# Supplementary material for: Systematic Functional Interrogation of Rare Cancer Variants Identifies Oncogenic Alleles
Source: Oxford University Press journal article supplement (doi:10.1158/2159-8290.cd-16-0160), 2016-05-05
Supplement: 21598290cd160160-sup-162070_1_supp_3443525_x5fwsm.xlsx [file 21598290cd160160-sup-162070_1_supp_3443525_x5fwsm.xlsx]

## Sheet: Supplementary Table S1 Genes an
Supplementary Table S1: Genes and alleles selected for the project
gene	cDNA_change	protein_change	chromosome	position	reference_allele	newbase	template_available	mutagenesis_successful	BarcodedVectorID	n_AML	n_BLAD	n_Breast	n_CLL	n_CRC	n_Carcinoid	n_Cervical	n_DLBCL	n_Esoph	n_GBM	n_HN	n_KIRC	n_KIRP	n_LGG	n_LUAD	n_LUSC	n_MED	n_MM	n_Melanoma	n_NB	n_OV	n_Pancreas	n_Prostate	n_Rhabdoid	n_STAD	n_Thyroid	n_UCEC	n_pancan
A4GALT	A4GALT_c.815C>T	p.A272V	22	43089143	G	A	TRUE	TRUE	BRDN0000552710	0	0	0	0	0	0	0	0	0	1	0	0	0	0	0	0	0	0	0	0	0	0	0	0	0	0	0	1
ACTG1	ACTG1_c.64G>C	p.A22P	17	79479317	C	G	TRUE	TRUE	BRDN0000552723	0	0	0	0	0	0	0	0	0	0	0	0	0	0	0	0	0	2	0	0	0	0	0	0	0	0	0	2
ACTG1	ACTG1_c.181A>G	p.K61E	17	79479111	T	C	TRUE	TRUE	BRDN0000552803	0	0	0	0	0	0	0	0	0	0	0	0	0	0	0	0	0	0	0	0	0	0	0	0	0	0	1	1
ACVR1B	ACVR1B_c.1003G>A	p.D335N	12	52378999	G	A	TRUE	TRUE	BRDN0000553063	0	0	0	0	1	0	0	0	0	0	0	0	0	0	0	0	0	0	0	0	0	0	0	0	0	0	0	1
ACVR1B	ACVR1B_c.1236G>C	p.E412D	12	52380701	G	C	TRUE	TRUE	BRDN0000553074	0	0	1	0	0	0	0	0	0	0	0	0	0	0	0	0	0	0	0	0	0	0	0	0	0	0	0	1
ACVR1B	ACVR1B_c.646G>A	p.G216S	12	52374818	G	A	TRUE	FALSE	failed_QC	0	0	0	0	1	0	0	0	0	0	0	0	0	0	0	0	0	0	0	0	0	0	0	0	0	0	0	1
ACVR2A	ACVR2A_c.1142C>T	p.A381V	2	148680606	C	T	TRUE	TRUE	BRDN0000553047	0	0	0	0	0	0	0	0	0	0	0	0	0	0	0	0	0	0	0	0	0	0	0	0	0	0	1	1
ACVR2A	ACVR2A_c.640G>A	p.E214K	2	148672871	G	A	TRUE	FALSE	failed_QC	0	0	0	0	0	0	0	0	0	0	0	0	0	0	0	0	0	0	0	0	0	0	0	0	0	0	1	1
ADORA2A	ADORA2A_c.658C>T	p.R220W	22	24836876	C	T	TRUE	TRUE	BRDN0000552881	0	0	0	0	0	0	0	0	0	0	0	0	0	0	0	0	0	0	0	0	0	0	0	0	0	0	2	2
AKT1	AKT1_c.1108C>T	p.R370C	14	105239279	G	A	TRUE	TRUE	BRDN0000552854	0	0	0	0	1	0	0	0	0	0	0	0	0	0	0	0	0	0	0	0	0	0	0	0	0	0	0	1
AKT1	AKT1_c.130G>A	p.D44N	14	105246470	C	T	TRUE	TRUE	BRDN0000553012	0	0	0	0	0	0	0	0	0	0	0	0	0	0	0	0	0	0	0	0	0	0	0	0	0	0	1	1
AKT1	AKT1_c.49G>A	p.E17K	14	105246551	C	T	TRUE	TRUE	BRDN0000553021	0	0	15	0	0	0	0	0	0	0	1	0	0	0	2	1	0	0	1	0	0	0	2	0	1	0	4	27
AKT1	AKT1_c.601G>A	p.V201I	14	105241307	C	T	TRUE	TRUE	BRDN0000553083	0	0	0	0	0	0	0	0	0	0	0	0	0	1	0	0	0	0	0	0	0	0	0	0	0	0	0	1
AKT1	AKT1_c.800A>G	p.E267G	14	105239820	T	C	TRUE	TRUE	BRDN0000553685	0	0	0	0	0	0	0	0	0	0	0	0	0	0	0	0	0	0	1	0	0	0	0	0	0	0	0	1
AKT1	AKT1_c.235C>A	p.Q79K	14	105243048	G	T	TRUE	TRUE	BRDN0000560857	0	0	0	0	0	0	0	0	0	0	0	0	0	0	0	0	0	0	0	0	0	0	0	0	0	0	1	1
AKT1	AKT1_c.155T>G	p.L52R	14	105246445	A	C	TRUE	TRUE	BRDN0000560921	0	0	1	0	0	0	0	0	0	0	0	1	0	0	0	0	0	0	0	0	0	0	0	0	0	0	0	2
AKT1	AKT1_c.661G>A	p.D221N	14	105240290	C	T	TRUE	FALSE	failed_QC	0	0	0	0	0	0	0	0	0	0	0	0	0	0	0	0	1	0	0	0	0	0	0	0	0	0	0	1
ALK	ALK_c.2236G>T	p.G746C	2	29462665	C	A	FALSE	FALSE	template_unavailable	0	0	0	0	0	0	0	0	0	0	0	0	0	0	0	0	0	0	0	0	0	0	0	0	0	0	1	1
ALK	ALK_c.2586G>T	p.E862D	2	29455216	C	A	FALSE	FALSE	template_unavailable	0	0	0	0	0	0	0	0	0	0	0	0	0	0	0	0	0	0	0	0	0	0	0	0	0	0	1	1
ALK	ALK_c.2764G>A	p.G922R	2	29451801	C	T	FALSE	FALSE	template_unavailable	0	0	0	0	0	0	0	0	0	0	0	0	0	0	0	0	0	0	1	0	0	0	0	0	0	0	0	1
ALK	ALK_c.3335C>A	p.P1112Q	2	29446232	G	T	FALSE	FALSE	template_unavailable	0	0	0	0	0	0	0	0	0	0	0	0	0	0	0	1	0	0	0	0	0	0	0	0	0	0	0	1
ALK	ALK_c.3415C>T	p.P1139S	2	29445418	G	A	FALSE	FALSE	template_unavailable	0	0	0	0	0	0	0	0	0	0	0	0	0	0	0	0	0	1	0	0	0	0	0	0	0	0	0	1
ALK	ALK_c.3522C>A	p.F1174L	2	29443695	G	T	FALSE	FALSE	template_unavailable	0	0	0	0	0	0	0	0	0	0	0	0	0	0	0	0	0	0	0	2	0	0	0	0	0	0	0	2
ALK	ALK_c.3806G>A	p.G1269E	2	29432682	C	T	FALSE	FALSE	template_unavailable	0	0	0	0	0	0	0	0	0	0	0	0	0	0	0	0	0	0	1	0	0	0	0	0	0	0	0	1
AMELX	AMELX_c.53C>T	p.P18L	23	11312961	C	T	FALSE	FALSE	template_unavailable	0	0	0	0	0	0	0	0	0	0	0	0	0	0	1	0	0	0	0	0	0	0	0	0	0	0	0	1
ANKRD45	ANKRD45_c.613C>T	p.R205C	1	173594043	G	A	FALSE	FALSE	template_unavailable	0	0	0	0	0	0	0	0	0	0	0	0	0	0	0	0	0	1	0	0	0	0	0	0	0	0	0	1
APC	APC_c.3473G>A	p.R1158K	5	112174764	G	A	FALSE	FALSE	template_unavailable	0	0	0	0	0	0	0	0	0	0	0	0	0	0	0	0	0	0	1	0	0	0	0	0	0	0	0	1
APC	APC_c.3857A>G	p.E1286G	5	112175148	A	G	FALSE	FALSE	template_unavailable	0	0	0	0	0	0	0	0	0	0	0	0	0	0	0	0	0	0	0	0	1	0	0	0	0	0	0	1
APC	APC_c.3934G>C	p.G1312R	5	112175225	G	C	FALSE	FALSE	template_unavailable	0	0	0	0	0	0	0	0	0	0	0	0	0	0	1	0	0	0	0	0	0	0	0	0	0	0	0	1
APC	APC_c.4039G>A	p.A1347T	5	112175330	G	A	FALSE	FALSE	template_unavailable	0	0	0	0	0	0	0	0	0	0	0	0	0	0	0	0	0	0	1	0	0	0	0	0	0	0	0	1
APC	APC_c.4229G>C	p.C1410S	5	112175520	G	C	FALSE	FALSE	template_unavailable	0	0	0	0	1	0	0	0	0	0	0	0	0	0	0	0	0	0	0	0	0	0	0	0	0	0	0	1
APC	APC_c.4286A>G	p.Q1429R	5	112175577	A	G	FALSE	FALSE	template_unavailable	0	0	0	0	0	0	0	0	0	0	0	0	0	0	0	0	0	0	0	0	1	0	0	0	0	0	0	1
APC	APC_c.4354G>A	p.V1452I	5	112175645	G	A	FALSE	FALSE	template_unavailable	0	0	0	0	0	0	0	0	0	0	0	0	0	0	0	0	0	0	0	0	0	0	0	0	0	0	1	1
APC	APC_c.641C>T	p.A214V	5	112116596	C	T	FALSE	FALSE	template_unavailable	0	0	0	0	0	0	0	0	0	0	0	0	0	0	0	0	0	0	0	0	0	0	0	0	0	0	1	1
ARID1A	ARID1A_c.1583A>T	p.Q528L	1	27057875	A	T	FALSE	FALSE	template_unavailable	0	0	0	0	0	0	0	0	0	0	0	0	0	0	0	1	0	0	0	0	0	0	0	0	0	0	0	1
ARID1A	ARID1A_c.3142C>T	p.P1048S	1	27094434	C	T	FALSE	FALSE	template_unavailable	0	0	0	0	0	0	0	0	0	0	0	0	0	0	0	0	0	0	0	0	0	0	0	0	1	0	0	1
ARID1A	ARID1A_c.3430C>T	p.P1144S	1	27099014	C	T	FALSE	FALSE	template_unavailable	0	0	0	0	0	0	0	0	0	0	0	0	0	0	0	0	0	0	0	0	0	0	0	0	0	0	1	1
ARID1A	ARID1A_c.3949G>T	p.G1317W	1	27100153	G	T	FALSE	FALSE	template_unavailable	0	0	0	0	0	0	0	0	0	0	0	0	0	0	0	0	0	0	0	0	0	0	0	0	0	0	1	1
ARID1A	ARID1A_c.5269G>T	p.A1757S	1	27105658	G	T	FALSE	FALSE	template_unavailable	0	0	0	0	0	0	0	0	0	0	0	0	0	1	0	0	0	0	0	0	0	0	0	0	0	0	0	1
ARID1A	ARID1A_c.6256G>A	p.D2086N	1	27106645	G	A	FALSE	FALSE	template_unavailable	0	0	0	0	0	0	0	0	0	0	0	0	0	0	0	0	0	0	1	0	0	0	0	0	0	0	0	1
ARID1A	ARID1A_c.6469G>A	p.D2157N	1	27106858	G	A	FALSE	FALSE	template_unavailable	0	0	0	0	1	0	0	0	0	0	0	0	0	0	0	0	0	0	0	0	0	0	0	0	0	0	0	1
ARID1A	ARID1A_c.6473G>A	p.R2158Q	1	27106862	G	A	FALSE	FALSE	template_unavailable	0	0	0	0	0	0	0	0	0	0	0	0	0	0	0	0	0	0	0	0	0	0	0	0	1	0	0	1
ARID2	ARID2_c.1119A>C	p.R373S	12	46231199	A	C	FALSE	FALSE	template_unavailable	0	0	0	0	0	0	0	0	0	0	0	0	0	0	0	1	0	0	0	0	0	0	0	0	0	0	0	1
ARID2	ARID2_c.4150C>T	p.H1384Y	12	46246056	C	T	FALSE	FALSE	template_unavailable	0	0	0	0	0	0	0	0	0	0	0	0	0	0	0	0	0	0	1	0	0	0	0	0	0	0	0	1
ARID2	ARID2_c.4390C>T	p.R1464C	12	46246296	C	T	FALSE	FALSE	template_unavailable	0	0	0	0	0	0	0	0	0	0	0	0	0	0	0	0	0	0	0	0	0	0	0	0	1	0	0	1
ARID2	ARID2_c.484G>T	p.V162L	12	46211518	G	T	FALSE	FALSE	template_unavailable	0	0	0	0	0	0	0	0	0	0	0	0	0	0	0	0	0	0	0	0	0	0	0	0	1	0	0	1
ARID2	ARID2_c.586G>T	p.D196Y	12	46211620	G	T	FALSE	FALSE	template_unavailable	0	0	0	0	0	0	0	0	0	0	0	0	0	0	0	0	0	0	0	0	0	0	0	0	0	0	1	1
ARID2	ARID2_c.853C>T	p.R285W	12	46230604	C	T	FALSE	FALSE	template_unavailable	0	0	0	0	1	0	0	0	0	0	0	0	0	0	0	0	0	0	0	0	0	0	0	0	0	0	1	2
ARID2	ARID2_c.859C>A	p.L287I	12	46230610	C	A	FALSE	FALSE	template_unavailable	0	0	0	0	0	0	0	0	0	0	0	0	0	0	1	0	0	0	0	0	0	0	0	0	0	0	0	1
ARID2	ARID2_c.940C>T	p.R314C	12	46230691	C	T	FALSE	FALSE	template_unavailable	0	0	0	0	1	0	0	0	0	0	0	0	0	0	0	0	0	0	2	0	0	0	0	0	0	0	0	3
ARL6IP1	ARL6IP1_c.223A>T	p.M75L	16	18809314	T	A	FALSE	FALSE	template_unavailable	0	0	0	0	0	0	0	0	0	0	0	0	0	0	0	0	0	2	0	0	0	0	0	0	0	0	0	2
ARSI	ARSI_c.1117G>A	p.V373M	5	149677370	C	T	TRUE	TRUE	BRDN0000553131	1	0	0	0	0	0	0	0	0	0	0	0	0	0	0	0	0	0	0	0	0	0	0	0	0	0	0	1
ARSI	ARSI_c.683C>T	p.P228L	5	149677804	G	A	TRUE	TRUE	BRDN0000553787	0	0	0	0	0	0	0	0	0	0	0	0	0	0	0	0	0	0	1	0	0	0	0	0	0	0	0	1
ASCL4	ASCL4_c.341C>T	p.T114M	12	108169333	C	T	TRUE	TRUE	BRDN0000553395	0	0	0	0	0	0	0	0	0	0	0	0	0	0	0	0	0	0	0	0	0	0	0	0	1	0	0	1
ATM	ATM_c.1010G>A	p.R337H	11	108117799	G	A	FALSE	FALSE	template_unavailable	0	1	0	0	0	0	0	0	0	0	0	0	0	0	0	0	0	0	0	0	0	0	0	0	0	0	0	1
ATM	ATM_c.1288T>A	p.C430S	11	108121480	T	A	FALSE	FALSE	template_unavailable	0	0	0	0	0	0	0	0	0	0	0	0	0	0	0	0	0	0	1	0	0	0	0	0	0	0	0	1
ATM	ATM_c.4397G>A	p.R1466Q	11	108160489	G	A	FALSE	FALSE	template_unavailable	0	0	0	0	0	0	0	0	0	0	0	0	0	0	0	0	0	0	0	0	0	0	0	0	1	0	0	1
ATM	ATM_c.6112C>T	p.H2038Y	11	108186754	C	T	FALSE	FALSE	template_unavailable	0	0	0	0	0	0	0	0	0	0	0	0	0	0	0	0	0	0	0	0	0	0	1	0	0	0	0	1
ATM	ATM_c.743G>A	p.R248Q	11	108115595	G	A	FALSE	FALSE	template_unavailable	0	0	0	0	0	0	0	0	0	0	0	0	0	0	0	0	0	0	0	0	0	0	0	0	0	0	1	1
ATM	ATM_c.8083G>A	p.G2695S	11	108205768	G	A	FALSE	FALSE	template_unavailable	0	0	0	0	0	0	0	0	0	0	0	0	0	0	1	0	0	0	0	0	0	0	1	0	0	0	0	2
ATM	ATM_c.8158G>A	p.D2720N	11	108206578	G	A	FALSE	FALSE	template_unavailable	0	0	1	0	0	0	0	0	0	0	0	0	0	0	0	0	0	0	0	0	0	0	0	0	0	0	0	1
ATM	ATM_c.9016G>A	p.A3006T	11	108236080	G	A	FALSE	FALSE	template_unavailable	0	0	0	1	0	0	0	0	0	0	0	0	0	0	0	0	0	0	0	0	0	0	0	0	0	0	0	1
ATP13A4	ATP13A4_c.1292T>G	p.V431G	3	193182898	A	C	FALSE	FALSE	template_unavailable	0	0	0	0	0	0	0	0	0	0	0	0	0	0	0	0	0	4	0	0	0	0	0	0	0	0	0	4
ATP13A4	ATP13A4_c.1483G>A	p.G495S	3	193180591	C	T	FALSE	FALSE	template_unavailable	0	0	0	0	1	0	0	0	0	0	0	0	0	0	0	0	0	0	0	0	0	0	0	0	0	0	0	1
ATP13A4	ATP13A4_c.1901G>T	p.C634F	3	193174803	C	A	FALSE	FALSE	template_unavailable	0	0	0	0	0	0	0	0	0	0	0	0	0	0	0	1	0	0	0	0	0	0	0	0	0	0	0	1
ATP13A4	ATP13A4_c.2011G>A	p.A671T	3	193171906	C	T	FALSE	FALSE	template_unavailable	0	0	0	0	1	0	0	0	0	0	0	0	0	0	0	0	0	0	0	0	0	0	0	0	0	0	0	1
ATP13A4	ATP13A4_c.2390G>A	p.G797E	3	193159304	C	T	FALSE	FALSE	template_unavailable	0	0	0	0	0	0	0	0	0	0	0	0	0	0	0	0	0	0	2	0	0	0	0	0	0	0	0	2
ATP13A4	ATP13A4_c.2500G>A	p.E834K	3	193158366	C	T	FALSE	FALSE	template_unavailable	0	0	0	0	0	0	0	0	0	0	0	0	0	0	0	0	0	0	1	0	0	0	0	0	0	0	0	1
ATP13A4	ATP13A4_c.799G>A	p.G267R	3	193201734	C	T	FALSE	FALSE	template_unavailable	0	0	0	0	0	0	0	0	0	0	0	0	0	0	0	0	0	0	1	0	0	0	0	0	0	0	0	1
ATPIF1	ATPIF1_c.246G>T	p.K82N	1	28564414	G	T	TRUE	FALSE	failed_QC	0	0	0	0	0	0	0	0	0	0	0	0	0	0	1	0	0	0	0	0	0	0	0	0	0	0	0	1
ATRX	ATRX_c.1025C>T	p.S342F	23	76939723	G	A	FALSE	FALSE	template_unavailable	0	0	0	0	0	0	0	0	0	0	0	0	0	0	0	0	0	0	1	0	0	0	0	0	0	0	0	1
ATRX	ATRX_c.2769G>T	p.K923N	23	76937979	C	A	FALSE	FALSE	template_unavailable	0	0	0	0	0	0	0	0	0	0	1	0	0	0	0	0	0	0	0	0	0	0	0	0	0	0	0	1
ATRX	ATRX_c.3899A>G	p.K1300R	23	76920178	T	C	FALSE	FALSE	template_unavailable	0	0	0	0	0	0	0	0	0	0	0	0	0	0	1	0	0	0	0	0	0	0	0	0	0	0	0	1
ATRX	ATRX_c.4148A>C	p.D1383A	23	76912116	T	G	FALSE	FALSE	template_unavailable	0	0	0	0	0	0	0	0	0	0	0	0	0	0	0	0	0	0	0	0	0	0	0	0	0	0	1	1
ATRX	ATRX_c.4387G>A	p.E1463K	23	76907774	C	T	FALSE	FALSE	template_unavailable	0	0	0	0	0	0	0	0	0	0	0	0	0	0	0	0	0	0	0	0	0	0	0	0	0	0	1	1
ATRX	ATRX_c.4844A>G	p.D1615G	23	76889166	T	C	FALSE	FALSE	template_unavailable	0	0	0	0	0	0	0	0	0	0	0	0	0	0	0	0	0	0	0	0	0	0	0	0	0	0	1	1
ATRX	ATRX_c.6406G>A	p.D2136N	23	76814238	C	T	FALSE	FALSE	template_unavailable	0	0	0	0	0	0	0	0	0	0	0	0	0	0	0	0	0	0	0	0	0	0	0	0	0	0	1	1
ATRX	ATRX_c.7054G>T	p.D2352Y	23	76776898	C	A	FALSE	FALSE	template_unavailable	0	0	0	0	0	0	0	0	0	0	0	0	0	0	1	0	0	0	0	0	0	0	0	0	0	0	0	1
ATXN3	ATXN3_c.176G>A	p.R59H	14	92563031	C	T	TRUE	FALSE	failed_QC	0	0	0	0	1	0	0	0	0	0	0	0	0	0	0	0	0	0	0	0	0	0	0	0	1	0	0	2
B2M	B2M_c.2T>G	p.M1R	15	45003746	T	G	TRUE	TRUE	BRDN0000552284	0	0	0	0	0	0	0	1	0	0	0	0	0	0	0	0	0	0	0	0	0	0	0	0	0	0	0	1
B2M	B2M_c.88T>C	p.Y30H	15	45007641	T	C	TRUE	TRUE	BRDN0000552342	0	0	0	0	1	0	0	0	0	0	0	0	0	0	0	0	0	0	0	0	0	0	0	0	0	0	0	1
B2M	B2M_c.17C>T	p.A6V	15	45003761	C	T	TRUE	TRUE	BRDN0000552354	0	0	0	0	0	0	0	0	0	0	0	0	0	0	0	0	0	0	0	0	0	0	0	0	0	0	1	1
B2M	B2M_c.1A>C	p.M1L	15	45003745	A	C	TRUE	TRUE	BRDN0000552366	0	0	0	0	1	0	0	0	0	0	0	0	0	0	0	0	0	0	0	0	0	0	0	0	0	0	0	1
B2M	B2M_c.1A>G	p.M1V	15	45003745	A	G	TRUE	TRUE	BRDN0000552378	0	0	0	0	0	0	0	0	0	0	0	0	0	0	1	0	0	0	0	0	2	0	0	0	0	0	0	3
B2M	B2M_c.3G>A	p.M1I	15	45003747	G	A	TRUE	TRUE	BRDN0000552390	0	0	0	0	0	0	0	0	0	0	0	0	0	0	0	1	0	0	0	0	0	0	0	0	1	0	0	2
B2M	B2M_c.160G>A	p.D54N	15	45007713	G	A	TRUE	TRUE	BRDN0000552412	0	1	0	0	0	0	0	0	0	1	0	0	0	0	0	0	0	0	0	0	0	0	0	0	0	0	0	2
B2M	B2M_c.298T>A	p.C100S	15	45007851	T	A	TRUE	TRUE	BRDN0000552423	0	0	0	0	0	0	0	1	0	0	0	0	0	0	0	0	0	0	0	0	0	0	0	0	0	0	0	1
BAP1	BAP1_c.224A>G	p.D75G	3	52442521	T	C	TRUE	TRUE	BRDN0000553311	0	0	0	0	0	0	0	0	0	0	0	1	0	0	0	0	0	0	0	0	0	0	0	0	0	0	0	1
BAP1	BAP1_c.896A>G	p.N299S	3	52439816	T	C	TRUE	TRUE	BRDN0000553705	0	0	0	0	1	0	0	0	0	0	0	0	0	0	0	0	0	0	0	0	0	0	0	0	0	0	0	1
BAP1	BAP1_c.141C>G	p.I47M	3	52442604	G	C	TRUE	FALSE	failed_QC	0	1	0	0	0	0	0	0	0	0	0	0	0	0	0	0	0	0	0	0	0	0	0	0	0	0	0	1
BAP1	BAP1_c.3G>A	p.M1I	3	52443892	C	T	TRUE	FALSE	failed_QC	0	0	0	0	0	0	0	0	0	0	0	2	0	0	0	0	0	0	0	0	0	0	0	0	0	0	0	2
BAP1	BAP1_c.680G>A	p.R227H	3	52440372	C	T	TRUE	FALSE	failed_QC	0	0	0	0	0	0	0	0	0	0	0	0	0	0	0	1	0	0	0	0	0	0	0	0	0	0	0	1
BCL2	BCL2_c.4G>C	p.A2P	18	60985896	C	G	FALSE	FALSE	template_unavailable	0	0	0	0	0	0	0	1	0	0	0	0	0	0	0	0	0	0	0	0	0	0	0	0	0	0	0	1
BCL3	BCL3_c.1331C>A	p.P444Q	19	45262838	C	A	FALSE	FALSE	template_unavailable	0	0	0	0	0	0	0	0	0	0	0	0	0	0	0	0	0	0	0	0	1	0	0	0	0	0	0	1
BCL6	BCL6_c.1757C>A	p.P586Q	3	187443369	G	T	TRUE	FALSE	failed_QC	0	0	0	0	1	0	0	0	0	0	0	1	0	0	0	0	0	0	0	0	0	0	0	0	0	0	0	2
BCL6	BCL6_c.2045G>T	p.G682V	3	187440322	C	A	TRUE	FALSE	failed_QC	0	0	0	0	0	0	0	0	0	0	0	0	0	0	1	0	0	0	0	0	0	0	0	0	0	0	0	1
BCL6	BCL6_c.794T>A	p.I265N	3	187447399	A	T	TRUE	FALSE	failed_QC	0	0	0	0	0	0	0	0	0	0	0	1	0	0	0	0	0	0	0	0	0	0	0	0	0	0	0	1
BCL9	BCL9_c.1642G>A	p.G548S	1	147091603	G	A	FALSE	FALSE	template_unavailable	0	0	0	1	0	0	0	0	0	0	0	0	0	0	0	0	0	0	0	0	0	0	0	0	0	0	0	1
BCL9	BCL9_c.2000G>A	p.R667H	1	147091961	G	A	FALSE	FALSE	template_unavailable	0	0	0	0	0	0	0	0	0	0	0	0	0	0	0	0	1	0	0	0	0	0	0	0	1	0	0	2
BCL9	BCL9_c.2361G>A	p.M787I	1	147092322	G	A	FALSE	FALSE	template_unavailable	0	0	0	0	0	0	0	0	0	0	0	0	0	0	0	0	0	0	0	0	0	0	0	0	0	0	1	1
BCL9	BCL9_c.2584C>A	p.P862T	1	147092545	C	A	FALSE	FALSE	template_unavailable	0	0	1	0	0	0	0	0	0	0	0	0	0	0	0	0	0	0	0	0	0	0	0	0	0	0	0	1
BCL9	BCL9_c.3439C>T	p.P1147S	1	147095918	C	T	FALSE	FALSE	template_unavailable	0	0	0	0	0	0	0	0	0	0	0	0	0	0	0	0	0	0	1	0	0	0	0	0	0	0	0	1
BCL9	BCL9_c.3477T>G	p.S1159R	1	147095956	T	G	FALSE	FALSE	template_unavailable	0	0	0	0	0	0	0	0	0	0	0	1	0	0	0	0	0	0	0	0	0	0	0	0	0	0	0	1
BCLAF1	BCLAF1_c.1257G>T	p.Q419H	6	136597406	C	A	FALSE	FALSE	template_unavailable	0	0	0	0	0	0	0	0	0	1	0	0	0	0	0	0	0	0	0	0	0	0	0	0	0	0	0	1
BCLAF1	BCLAF1_c.2334A>C	p.K778N	6	136589363	T	G	FALSE	FALSE	template_unavailable	0	0	0	0	0	0	0	0	0	0	0	0	0	0	0	0	0	0	0	0	0	0	0	0	0	0	1	1
BCLAF1	BCLAF1_c.2645G>T	p.G882V	6	136582515	C	A	FALSE	FALSE	template_unavailable	0	0	0	0	0	0	0	0	0	0	1	0	0	0	0	0	0	0	0	0	0	0	0	0	0	0	0	1
BCLAF1	BCLAF1_c.389G>A	p.R130H	6	136599630	C	T	FALSE	FALSE	template_unavailable	0	0	0	0	0	0	0	0	0	1	0	0	0	0	0	0	0	0	0	0	0	0	0	0	0	0	1	2
BCLAF1	BCLAF1_c.391C>T	p.R131W	6	136599628	G	A	FALSE	FALSE	template_unavailable	0	0	0	0	0	0	0	0	0	0	0	0	0	0	1	0	0	0	0	0	0	0	0	0	0	0	0	1
BCLAF1	BCLAF1_c.487G>A	p.E163K	6	136599532	C	T	FALSE	FALSE	template_unavailable	0	0	0	0	0	0	0	0	0	0	0	0	0	0	0	0	0	0	5	0	0	0	0	0	0	0	0	5
BCLAF1	BCLAF1_c.555G>C	p.E185D	6	136599464	C	G	FALSE	FALSE	template_unavailable	0	0	0	0	0	0	0	0	0	0	0	0	0	0	0	1	0	0	0	0	0	0	0	0	0	0	0	1
BCLAF1	BCLAF1_c.959C>T	p.S320L	6	136599060	G	A	FALSE	FALSE	template_unavailable	0	0	0	0	0	0	0	0	0	0	0	0	0	0	0	0	0	0	2	0	0	0	0	0	0	0	0	2
BCOR	BCOR_c.1312G>A	p.D438N	23	39933287	C	T	FALSE	FALSE	template_unavailable	0	1	0	0	0	0	0	0	0	0	0	0	0	0	0	0	0	0	0	0	0	0	0	0	0	0	0	1
BCOR	BCOR_c.1527G>T	p.W509C	23	39933072	C	A	FALSE	FALSE	template_unavailable	0	0	0	0	1	0	0	0	0	0	0	0	0	0	0	0	0	0	0	0	0	0	0	0	0	0	0	1
BCOR	BCOR_c.3391C>T	p.R1131W	23	39923700	G	A	FALSE	FALSE	template_unavailable	0	0	0	0	0	0	0	0	0	0	0	0	0	0	0	0	0	0	0	0	0	0	0	0	0	0	1	1
BCOR	BCOR_c.4156G>C	p.E1386Q	23	39922016	C	G	FALSE	FALSE	template_unavailable	0	0	0	0	0	0	0	0	0	0	0	0	0	0	0	1	0	0	0	0	0	0	0	0	0	0	0	1
BCOR	BCOR_c.4162G>T	p.A1388S	23	39922010	C	A	FALSE	FALSE	template_unavailable	0	0	0	0	0	0	0	0	0	0	0	0	0	0	1	0	0	0	0	0	0	0	0	0	0	0	0	1
BCOR	BCOR_c.4367T>C	p.L1456P	23	39921453	A	G	FALSE	FALSE	template_unavailable	0	0	0	0	0	0	0	0	0	0	0	0	0	0	0	0	0	0	0	0	0	0	0	0	0	0	1	1
BCOR	BCOR_c.4376A>G	p.N1459S	23	39921444	T	C	FALSE	FALSE	template_unavailable	0	0	0	0	0	0	0	1	0	0	0	0	0	0	2	0	0	0	0	0	0	0	0	0	0	0	13	16
BCOR	BCOR_c.797G>T	p.R266M	23	39933802	C	A	FALSE	FALSE	template_unavailable	0	0	0	0	0	0	0	0	0	0	0	0	0	0	0	1	0	0	0	0	0	0	0	0	0	0	0	1
BCR	BCR_c.1276G>T	p.A426S	22	23524423	G	T	TRUE	TRUE	BRDN0000554076	0	0	0	0	0	0	0	0	0	0	0	0	0	0	0	1	0	0	0	0	0	0	0	0	0	0	0	1
BCR	BCR_c.1735G>A	p.D579N	22	23603710	G	A	TRUE	FALSE	failed_QC	0	0	0	0	0	0	0	0	0	0	0	0	0	0	0	0	0	0	0	0	0	0	0	0	1	0	0	1
BCR	BCR_c.931T>C	p.W311R	22	23524078	T	C	TRUE	FALSE	failed_QC	0	0	0	0	0	0	0	1	0	0	0	0	0	0	0	0	0	0	0	0	0	0	0	0	0	0	0	1
BIRC6	BIRC6_c.11890G>T	p.V3964L	2	32750665	G	T	FALSE	FALSE	template_unavailable	0	0	0	0	0	0	0	0	0	0	0	0	0	0	0	1	0	0	0	0	0	0	0	0	0	0	0	1
BIRC6	BIRC6_c.12132G>T	p.E4044D	2	32756459	G	T	FALSE	FALSE	template_unavailable	0	0	0	0	0	0	0	0	0	1	0	0	0	0	0	0	0	0	0	0	0	0	0	0	0	0	0	1
BIRC6	BIRC6_c.14171C>T	p.S4724F	2	32832622	C	T	FALSE	FALSE	template_unavailable	0	0	0	0	0	0	0	0	0	0	0	0	0	0	0	1	0	0	0	0	0	0	0	0	0	0	0	1
BIRC6	BIRC6_c.1964A>C	p.K655T	2	32640323	A	C	FALSE	FALSE	template_unavailable	0	0	0	0	0	0	0	0	0	0	0	0	0	0	0	0	0	0	0	0	0	0	0	0	0	0	1	1
BIRC6	BIRC6_c.3224G>A	p.R1075Q	2	32656134	G	A	FALSE	FALSE	template_unavailable	0	0	0	0	0	0	0	0	0	0	0	0	0	0	0	0	0	0	0	0	0	0	0	0	0	0	2	2
BIRC6	BIRC6_c.5146G>A	p.V1716I	2	32689781	G	A	FALSE	FALSE	template_unavailable	0	0	0	0	1	0	0	0	0	0	0	0	0	0	0	0	0	0	0	0	0	0	0	0	0	0	0	1
BIRC6	BIRC6_c.826C>T	p.R276C	2	32613998	C	T	FALSE	FALSE	template_unavailable	0	0	0	0	0	0	0	0	0	0	0	1	0	0	1	0	0	0	0	0	0	0	0	0	0	0	0	2
BIRC6	BIRC6_c.8669G>T	p.R2890L	2	32724814	G	T	FALSE	FALSE	template_unavailable	0	0	0	0	0	0	0	0	0	0	0	0	0	0	1	0	0	0	0	0	0	0	0	0	0	0	0	1
BRAF	BRAF_c.1742A>G	p.N581S	7	140453193	T	C	TRUE	TRUE	BRDN0000553532	0	0	0	0	0	0	0	0	0	0	0	0	1	0	2	0	0	1	1	0	1	0	0	0	0	0	0	6
BRAF	BRAF_c.1790T>A	p.L597Q	7	140453145	A	T	TRUE	TRUE	BRDN0000553617	0	0	0	0	0	0	0	0	0	0	0	0	0	0	0	0	0	2	1	0	0	0	0	0	0	0	0	3
BRAF	BRAF_c.1799T>A	p.V600E	7	140453136	A	T	TRUE	TRUE	BRDN0000553655	0	0	0	0	20	0	0	0	0	5	0	0	1	0	3	0	0	6	147	0	0	0	0	0	0	100	0	282
BRAF	BRAF_c.1397G>C	p.G466A	7	140481411	C	G	TRUE	TRUE	BRDN0000553920	0	0	0	0	0	0	0	0	0	0	0	0	0	0	1	0	0	0	0	0	0	0	0	0	0	0	0	1
BRAF	BRAF_c.1397G>T	p.G466V	7	140481411	C	A	TRUE	TRUE	BRDN0000553929	0	0	0	0	0	0	0	0	0	0	0	0	0	0	2	1	0	1	0	0	0	0	0	0	0	0	0	4
BRAF	BRAF_c.1397G>A	p.G466E	7	140481411	C	T	TRUE	TRUE	BRDN0000553942	0	0	0	0	0	0	0	0	0	0	0	0	0	0	1	0	0	1	3	0	0	0	0	0	0	0	0	5
BRAF	BRAF_c.1801A>G	p.K601E	7	140453134	T	C	TRUE	FALSE	failed_QC	0	0	0	0	0	0	0	2	0	0	0	0	0	0	1	0	0	0	5	0	0	0	0	0	1	0	1	10
BRAF	BRAF_c.771G>T	p.Q257H	7	140501301	C	A	TRUE	FALSE	failed_QC	0	0	0	0	0	0	0	0	0	0	0	0	0	0	1	0	0	0	0	0	0	0	0	0	0	0	0	1
BRI3BP	BRI3BP_c.388G>A	p.G130S	12	125509608	G	A	FALSE	FALSE	template_unavailable	0	0	0	0	1	0	0	0	0	0	0	0	0	0	0	0	0	0	0	0	0	0	0	0	0	0	0	1
BRWD3	BRWD3_c.1160C>T	p.T387M	23	79985487	G	A	FALSE	FALSE	template_unavailable	0	0	0	0	0	0	0	0	0	1	0	0	0	0	0	0	0	0	0	0	0	1	0	0	0	0	0	2
BRWD3	BRWD3_c.1408G>A	p.V470I	23	79980545	C	T	FALSE	FALSE	template_unavailable	0	0	0	0	0	0	0	0	0	0	0	0	0	0	0	0	0	0	0	0	0	0	0	0	0	0	1	1
BRWD3	BRWD3_c.1672C>T	p.H558Y	23	79978265	G	A	FALSE	FALSE	template_unavailable	0	0	0	0	0	0	0	0	0	0	0	0	0	0	0	0	0	0	0	0	0	0	0	0	0	0	1	1
BRWD3	BRWD3_c.1746C>A	p.H582Q	23	79978191	G	T	FALSE	FALSE	template_unavailable	0	0	0	0	0	0	0	0	0	0	0	0	0	0	0	1	0	0	0	0	0	0	0	0	0	0	0	1
BRWD3	BRWD3_c.3425C>T	p.S1142F	23	79947378	G	A	FALSE	FALSE	template_unavailable	0	0	0	0	0	0	0	0	0	0	1	0	0	0	0	0	0	0	1	0	0	0	0	0	0	0	0	2
BRWD3	BRWD3_c.3728G>T	p.G1243V	23	79945466	C	A	FALSE	FALSE	template_unavailable	0	0	0	0	0	0	0	0	0	0	0	0	0	0	0	1	0	0	0	0	0	0	0	0	0	0	0	1
BRWD3	BRWD3_c.478C>A	p.H160N	23	80001181	G	T	FALSE	FALSE	template_unavailable	0	0	0	0	0	0	0	0	0	0	0	0	0	0	1	0	0	0	0	0	0	0	0	0	0	0	0	1
BRWD3	BRWD3_c.684G>T	p.M228I	23	79999660	C	A	FALSE	FALSE	template_unavailable	0	0	0	0	0	0	0	0	0	0	0	0	0	0	1	0	0	0	0	0	0	0	0	0	0	0	0	1
BTC	BTC_c.208C>T	p.P70S	4	75681142	G	A	TRUE	TRUE	BRDN0000552336	0	0	0	0	0	0	0	0	0	0	0	0	0	0	0	0	0	0	0	0	0	0	0	0	0	0	1	1
C13orf37	C13orf37_c.185C>T	p.S62L	13	73293130	G	A	TRUE	FALSE	failed_QC	0	0	0	0	0	0	0	0	0	0	0	0	0	0	0	0	0	0	0	0	0	0	0	0	0	0	1	1
C14orf101	C14orf101_c.1102G>A	p.A368T	14	57085357	G	A	TRUE	FALSE	failed_QC	0	0	0	0	0	0	0	0	0	0	0	0	0	0	0	0	0	0	0	0	0	0	0	0	0	0	1	1
C14orf101	C14orf101_c.883G>A	p.E295K	14	57082687	G	A	TRUE	FALSE	failed_QC	0	0	0	0	2	0	0	0	0	0	0	0	0	0	0	0	0	0	0	0	0	0	0	0	0	0	0	2
C14orf169	C14orf169_c.1411G>C	p.D471H	14	73959132	G	C	FALSE	FALSE	template_unavailable	0	0	0	0	0	0	0	0	1	0	0	0	0	0	0	0	0	0	0	0	0	0	0	0	0	0	0	1
C15orf2	C15orf2_c.1015C>T	p.P339S	15	24922029	C	T	FALSE	FALSE	template_unavailable	0	0	0	0	0	0	0	0	0	0	0	0	0	0	0	0	0	0	1	0	0	0	0	0	0	0	0	1
C15orf2	C15orf2_c.1330C>T	p.L444F	15	24922344	C	T	FALSE	FALSE	template_unavailable	0	0	0	0	0	0	0	0	0	0	0	0	0	0	0	0	0	0	1	0	0	0	0	0	0	0	0	1
C15orf2	C15orf2_c.157C>T	p.R53W	15	24921171	C	T	FALSE	FALSE	template_unavailable	0	0	0	0	0	0	0	0	0	0	0	0	0	0	0	1	0	0	0	0	0	0	0	0	0	0	0	1
C15orf2	C15orf2_c.187A>T	p.S63C	15	24921201	A	T	FALSE	FALSE	template_unavailable	0	0	0	0	0	0	0	0	0	0	0	0	0	0	1	0	0	0	0	0	0	0	0	0	0	0	0	1
C15orf2	C15orf2_c.230C>T	p.A77V	15	24921244	C	T	FALSE	FALSE	template_unavailable	0	0	0	0	0	0	0	0	0	0	0	0	0	0	0	0	0	0	1	0	0	0	0	0	0	0	0	1
C15orf2	C15orf2_c.335G>T	p.S112I	15	24921349	G	T	FALSE	FALSE	template_unavailable	0	0	0	0	0	0	0	0	0	0	0	0	0	0	1	0	0	0	0	0	0	0	0	0	0	0	0	1
C15orf2	C15orf2_c.511G>C	p.G171R	15	24921525	G	C	FALSE	FALSE	template_unavailable	0	0	0	0	0	0	0	0	0	0	0	0	0	0	1	0	0	0	0	0	0	0	0	0	0	0	0	1
C15orf2	C15orf2_c.877C>T	p.P293S	15	24921891	C	T	FALSE	FALSE	template_unavailable	0	0	0	0	0	0	0	0	0	0	0	0	0	0	0	0	0	0	1	0	0	0	0	0	0	0	0	1
C15orf23	C15orf23_c.77C>T	p.P26L	15	40675113	C	T	TRUE	TRUE	BRDN0000552531	0	0	0	0	0	0	0	0	0	0	1	0	0	0	0	0	0	0	0	0	0	0	0	0	0	0	0	1
C15orf23	C15orf23_c.76C>T	p.P26S	15	40675112	C	T	TRUE	TRUE	BRDN0000552617	0	0	0	0	0	0	0	0	0	0	0	0	0	0	0	0	0	0	1	0	0	0	0	0	0	0	0	1
C19orf48	C19orf48_c.208C>T	p.L70F	19	51301498	G	A	TRUE	TRUE	BRDN0000552298	0	0	0	0	0	0	0	0	0	0	0	0	0	0	0	0	0	0	0	0	0	0	0	0	0	0	1	1
C1orf150	C1orf150_c.5G>A	p.G2E	1	247712498	G	A	TRUE	TRUE	BRDN0000552333	0	0	0	0	0	0	0	0	0	0	0	0	0	0	0	0	0	0	4	0	0	0	0	0	0	0	0	4
C1orf150	C1orf150_c.265T>A	p.Y89N	1	247737541	T	A	TRUE	TRUE	BRDN0000552413	0	0	0	0	0	0	0	0	0	0	0	0	0	0	1	0	0	0	0	0	0	0	0	0	0	0	0	1
C20orf72	C20orf72_c.304C>T	p.P102S	20	17950806	C	T	TRUE	TRUE	BRDN0000552663	0	0	0	0	0	0	0	0	0	0	0	0	0	0	0	0	0	0	1	0	0	0	0	0	0	0	0	1
CASP8	CASP8_c.185T>C	p.L62P	2	202131394	T	C	TRUE	FALSE	failed_QC	0	0	0	0	1	0	0	0	0	0	1	0	0	0	0	0	0	0	0	0	0	0	0	0	0	0	0	2
CASP8	CASP8_c.296C>T	p.S99F	2	202131505	C	T	TRUE	FALSE	failed_QC	0	0	0	0	0	0	0	0	0	0	1	0	0	0	0	0	0	0	2	0	0	0	0	0	0	0	0	3
CASP8	CASP8_c.442A>G	p.K148E	2	202137391	A	G	TRUE	FALSE	failed_QC	0	0	0	0	0	0	0	0	0	0	0	1	0	0	0	0	0	0	0	0	0	0	0	0	0	0	0	1
CASP8	CASP8_c.1260G>C	p.W420C	2	202149996	G	C	FALSE	FALSE	template_unavailable	0	0	0	0	0	0	0	0	0	0	0	0	0	0	0	0	0	0	0	0	0	0	0	0	0	0	1	1
CASP8	CASP8_c.848C>T	p.P283L	2	202149584	C	T	FALSE	FALSE	template_unavailable	0	0	0	0	0	0	0	0	0	0	0	0	0	0	0	0	0	0	0	0	0	0	0	0	0	0	1	1
CASP8	CASP8_c.974G>A	p.G325D	2	202149710	G	A	FALSE	FALSE	template_unavailable	0	0	0	0	1	0	0	0	0	0	0	0	0	0	0	0	0	0	0	0	0	0	0	0	0	0	0	1
CBFB	CBFB_c.452G>A	p.R151H	16	67116168	G	A	TRUE	TRUE	BRDN0000552358	0	0	0	0	0	0	0	0	0	0	0	0	0	0	0	0	0	0	0	0	0	0	0	0	1	0	1	2
CCDC160	CCDC160_c.836G>T	p.S279I	23	133379666	G	T	FALSE	FALSE	template_unavailable	0	0	0	0	0	0	0	0	0	0	0	1	0	0	0	0	0	0	0	0	0	0	0	0	0	0	0	1
CCDC39	CCDC39_c.1709G>A	p.R570H	3	180359946	C	T	FALSE	FALSE	template_unavailable	0	0	0	0	0	0	0	0	0	0	0	0	0	0	0	0	0	0	0	0	0	0	0	0	1	0	0	1
CCDC39	CCDC39_c.1865A>T	p.E622V	3	180359790	T	A	FALSE	FALSE	template_unavailable	0	0	0	0	0	0	0	0	0	0	0	0	0	0	0	0	0	1	0	0	0	0	0	0	0	0	0	1
CCDC39	CCDC39_c.445G>A	p.E149K	3	180378429	C	T	FALSE	FALSE	template_unavailable	0	0	0	0	1	0	0	0	0	0	0	0	0	0	1	0	0	0	0	0	0	0	0	0	0	0	0	2
CCDC39	CCDC39_c.637T>G	p.F213V	3	180377341	A	C	FALSE	FALSE	template_unavailable	0	0	0	0	0	0	0	0	0	0	0	0	0	0	0	0	0	0	0	0	0	0	0	0	1	0	0	1
CCDC39	CCDC39_c.701T>C	p.M234T	3	180377277	A	G	FALSE	FALSE	template_unavailable	0	0	0	0	0	0	0	0	0	0	0	0	0	0	0	0	0	0	0	0	1	0	0	0	0	0	0	1
CCDC39	CCDC39_c.884C>T	p.T295M	3	180372596	G	A	FALSE	FALSE	template_unavailable	0	0	0	0	0	0	0	0	0	0	0	0	0	0	0	0	0	0	1	0	0	0	0	0	0	0	0	1
CCNG1	CCNG1_c.499G>A	p.E167K	5	162868318	G	A	TRUE	TRUE	BRDN0000552540	0	0	0	0	0	0	0	0	0	0	0	0	0	0	0	0	0	0	0	0	0	0	0	0	0	0	1	1
CD3E	CD3E_c.565G>C	p.E189Q	11	118185207	G	C	TRUE	TRUE	BRDN0000552429	0	1	0	0	0	0	0	0	0	0	0	0	0	0	0	0	0	0	0	0	0	0	0	0	0	0	0	1
CD70	CD70_c.493G>T	p.D165Y	19	6586120	C	A	TRUE	TRUE	BRDN0000554000	0	0	0	0	0	0	0	1	0	0	0	0	0	0	0	0	0	0	0	0	0	0	0	0	0	0	0	1
CD79B	CD79B_c.580C>A	p.H194N	17	62006805	G	T	TRUE	TRUE	BRDN0000552439	0	0	0	0	0	0	0	0	0	0	0	0	0	0	1	0	0	0	0	0	0	0	0	0	0	0	0	1
CDH1	CDH1_c.1006G>A	p.E336K	16	68845760	G	A	FALSE	FALSE	template_unavailable	0	0	0	0	0	0	0	0	0	0	0	0	0	0	0	0	0	0	0	0	0	0	0	0	1	0	0	1
CDH1	CDH1_c.1019C>T	p.T340M	16	68846048	C	T	FALSE	FALSE	template_unavailable	0	0	0	0	0	0	0	1	0	0	0	0	0	0	0	0	0	0	0	0	0	0	0	0	0	0	0	1
CDH1	CDH1_c.1205A>T	p.D402V	16	68847283	A	T	FALSE	FALSE	template_unavailable	0	0	0	0	0	0	0	0	0	0	0	0	0	0	0	0	0	0	0	0	0	0	0	0	1	0	0	1
CDH1	CDH1_c.2213A>G	p.K738R	16	68862125	A	G	FALSE	FALSE	template_unavailable	0	0	0	0	0	0	0	0	0	0	0	0	0	0	1	0	0	0	0	0	0	0	0	0	0	0	0	1
CDH1	CDH1_c.2471C>T	p.A824V	16	68867224	C	T	FALSE	FALSE	template_unavailable	0	0	0	0	0	0	0	0	0	0	0	0	0	0	0	0	0	0	0	0	0	0	0	0	0	0	1	1
CDH1	CDH1_c.727G>C	p.E243Q	16	68844139	G	C	FALSE	FALSE	template_unavailable	0	1	0	0	0	0	0	0	0	0	0	0	0	0	0	0	0	0	0	0	0	0	0	0	0	0	0	1
CDH10	CDH10_c.1234G>T	p.D412Y	5	24509697	C	A	FALSE	FALSE	template_unavailable	0	0	0	0	0	0	0	0	0	0	0	0	0	0	0	0	0	0	0	0	0	0	0	0	0	0	1	1
CDH10	CDH10_c.1417G>A	p.V473M	5	24498605	C	T	FALSE	FALSE	template_unavailable	0	0	0	0	0	0	0	0	0	0	0	0	0	0	0	0	0	0	0	0	0	0	0	0	0	0	1	1
CDH10	CDH10_c.152G>A	p.R51H	5	24593448	C	T	FALSE	FALSE	template_unavailable	0	0	0	1	0	0	0	0	0	0	0	0	0	0	0	0	0	0	0	0	0	0	0	0	0	0	0	1
CDH10	CDH10_c.2060G>A	p.R687Q	5	24488079	C	T	FALSE	FALSE	template_unavailable	0	0	0	0	1	0	0	0	0	0	0	0	0	0	0	0	0	0	0	0	0	0	0	0	0	0	0	1
CDH10	CDH10_c.2128G>A	p.V710I	5	24488011	C	T	FALSE	FALSE	template_unavailable	0	0	0	0	0	0	0	0	0	0	0	0	0	0	1	0	0	0	0	0	0	0	0	0	0	0	0	1
CDH10	CDH10_c.2293C>T	p.L765F	5	24487846	G	A	FALSE	FALSE	template_unavailable	0	0	0	0	0	0	0	0	0	0	0	0	0	0	0	0	0	0	1	0	0	0	0	0	0	0	0	1
CDH10	CDH10_c.341C>A	p.T114K	5	24537674	G	T	FALSE	FALSE	template_unavailable	0	0	0	0	0	0	0	0	0	0	0	0	0	0	1	0	0	0	0	0	0	0	0	0	0	0	0	1
CDH10	CDH10_c.958G>A	p.V320M	5	24511480	C	T	FALSE	FALSE	template_unavailable	0	0	0	0	0	0	0	0	0	0	0	0	0	0	0	0	0	0	0	0	0	0	0	0	0	0	1	1
CDH9	CDH9_c.1336C>T	p.L446F	5	26890591	G	A	TRUE	FALSE	failed_QC	0	0	0	0	0	0	0	0	0	0	0	0	0	0	0	0	0	0	1	0	0	0	0	0	0	0	0	1
CDH9	CDH9_c.146G>T	p.R49L	5	26988295	C	A	TRUE	FALSE	failed_QC	0	0	0	0	0	0	0	0	0	0	0	0	0	0	1	0	0	0	0	0	0	0	0	0	0	0	0	1
CDH9	CDH9_c.1561C>A	p.H521N	5	26886144	G	T	TRUE	FALSE	failed_QC	0	0	1	0	0	0	0	0	0	0	0	0	0	0	0	0	0	0	0	0	0	0	0	0	0	0	0	1
CDH9	CDH9_c.2102G>T	p.R701M	5	26881513	C	A	TRUE	FALSE	failed_QC	0	0	0	0	0	0	0	0	0	0	0	0	0	0	1	0	0	0	0	0	0	0	0	0	0	0	0	1
CDH9	CDH9_c.2201C>T	p.S734L	5	26881414	G	A	TRUE	FALSE	failed_QC	0	0	0	0	0	0	0	0	0	0	0	0	0	0	0	0	0	0	1	0	0	0	0	0	0	0	0	1
CDH9	CDH9_c.2342A>T	p.Y781F	5	26881273	T	A	TRUE	FALSE	failed_QC	0	0	0	0	0	0	0	0	0	0	0	0	0	0	1	0	0	0	0	0	0	0	0	0	0	0	0	1
CDH9	CDH9_c.428C>T	p.S143L	5	26915833	G	A	TRUE	FALSE	failed_QC	0	0	0	0	0	0	0	0	0	0	0	0	0	0	0	0	0	0	1	0	0	0	0	0	0	0	0	1
CDH9	CDH9_c.796C>T	p.P266S	5	26906083	G	A	TRUE	FALSE	failed_QC	0	0	0	0	0	0	0	0	0	0	0	0	0	0	0	0	0	0	1	0	0	0	0	0	0	0	0	1
CDK17	CDK17_c.530G>A	p.R177H	12	96704843	C	T	TRUE	TRUE	BRDN0000553028	0	0	0	0	0	0	0	0	0	0	0	0	0	0	0	0	0	0	0	0	0	0	0	0	0	0	1	1
CDK17	CDK17_c.255G>A	p.M85I	12	96717754	C	T	TRUE	TRUE	BRDN0000553115	0	0	0	0	0	0	0	0	0	0	0	0	0	0	0	0	0	0	0	0	1	0	0	0	0	0	0	1
CDK4	CDK4_c.67G>T	p.A23S	12	58145434	C	A	TRUE	TRUE	BRDN0000552449	0	0	0	0	0	0	0	0	0	0	0	0	0	0	1	0	0	0	0	0	0	0	0	0	0	0	0	1
CDKN1B	CDKN1B_c.86G>T	p.C29F	12	12870859	G	T	TRUE	TRUE	BRDN0000552327	0	0	0	0	0	0	0	0	0	0	1	0	0	0	0	0	0	0	0	0	0	0	0	0	0	0	0	1
CDKN2A	CDKN2A_c.150G>T	p.Q50H	9	21974677	C	A	FALSE	FALSE	template_unavailable	0	0	0	0	0	0	0	0	0	0	0	0	0	0	0	0	0	0	0	0	0	0	0	0	1	0	0	1
CDKN2A	CDKN2A_c.205C>T	p.P69S	9	21994249	G	A	FALSE	FALSE	template_unavailable	0	0	0	0	0	0	0	0	0	0	0	0	0	0	0	0	0	0	1	0	0	0	0	0	0	0	0	1
CDKN2A	CDKN2A_c.242C>T	p.P81L	9	21971116	G	A	FALSE	FALSE	template_unavailable	0	0	0	0	0	0	0	0	0	0	0	0	0	0	0	0	0	0	2	0	0	0	0	0	0	0	0	2
CDKN2A	CDKN2A_c.247C>T	p.H83Y	9	21971111	G	A	FALSE	FALSE	template_unavailable	0	0	0	0	0	0	0	0	0	0	2	0	0	0	1	0	0	0	0	0	0	1	0	0	1	0	0	5
CDKN2A	CDKN2A_c.248A>G	p.H83R	9	21971110	T	C	FALSE	FALSE	template_unavailable	0	0	0	0	0	0	0	0	0	0	1	0	0	0	0	0	0	0	2	0	0	0	0	0	0	0	0	3
CDKN2A	CDKN2A_c.322G>A	p.D108N	9	21971036	C	T	FALSE	FALSE	template_unavailable	0	1	0	0	0	0	0	0	0	0	0	0	0	0	0	1	0	0	0	0	0	0	0	0	0	0	0	2
CDKN2A	CDKN2A_c.322G>T	p.D108Y	9	21971036	C	A	FALSE	FALSE	template_unavailable	0	0	0	0	0	0	0	0	0	0	0	0	0	0	0	3	0	0	0	0	0	0	0	0	0	0	0	3
CDKN2A	CDKN2A_c.332G>A	p.G111D	9	21971026	C	T	FALSE	FALSE	template_unavailable	0	0	0	0	0	0	0	0	0	1	0	0	0	0	0	0	0	0	0	0	0	0	0	0	0	0	0	1
CHD2	CHD2_c.859G>C	p.E287Q	15	93486105	G	C	TRUE	TRUE	BRDN0000553034	0	1	0	0	0	0	0	0	0	0	0	0	0	0	0	0	0	0	0	0	0	0	0	0	0	0	0	1
CHD2	CHD2_c.1234G>A	p.E412K	15	93489303	G	A	TRUE	TRUE	BRDN0000553037	0	0	0	0	0	0	0	0	0	0	0	0	0	0	0	0	0	0	0	0	0	0	0	0	0	0	1	1
CHD2	CHD2_c.584C>T	p.P195L	15	93482840	C	T	TRUE	TRUE	BRDN0000553103	0	0	0	0	0	0	0	0	0	0	0	0	0	0	0	0	0	0	1	0	0	0	0	0	0	0	0	1
CHD2	CHD2_c.1421C>G	p.P474R	15	93492225	C	G	TRUE	TRUE	BRDN0000553120	0	0	0	0	0	0	0	0	0	0	0	0	0	0	1	0	0	0	0	0	0	0	0	0	0	0	0	1
CHD2	CHD2_c.2149C>G	p.L717V	15	93510703	C	G	FALSE	FALSE	template_unavailable	0	0	1	0	0	0	0	0	0	0	0	0	0	0	0	0	0	0	0	0	0	0	0	0	0	0	0	1
CHD2	CHD2_c.5185G>A	p.D1729N	15	93567633	G	A	FALSE	FALSE	template_unavailable	0	0	0	0	0	0	0	0	0	0	0	0	0	0	0	0	0	0	0	0	0	0	0	0	0	0	1	1
CHD4	CHD4_c.2630G>A	p.R877Q	12	6702279	C	T	FALSE	FALSE	template_unavailable	0	0	0	0	0	0	0	0	0	0	0	0	0	0	0	0	0	0	0	0	0	0	0	0	0	0	1	1
CHD4	CHD4_c.2924G>A	p.R975H	12	6701583	C	T	FALSE	FALSE	template_unavailable	0	0	0	0	2	0	0	0	0	0	0	0	0	0	0	0	0	0	0	0	0	0	0	0	0	0	4	6
CHD4	CHD4_c.3124G>T	p.G1042C	12	6700958	C	A	FALSE	FALSE	template_unavailable	0	0	0	0	0	0	0	0	0	0	0	0	0	0	0	0	0	0	0	0	1	0	0	0	0	0	0	1
CHD4	CHD4_c.3482A>G	p.H1161R	12	6697099	T	C	FALSE	FALSE	template_unavailable	0	0	0	0	0	0	0	0	0	0	0	0	0	0	1	0	0	0	0	0	0	0	0	0	0	0	0	1
CHD4	CHD4_c.3485G>A	p.R1162Q	12	6697096	C	T	FALSE	FALSE	template_unavailable	0	0	0	0	0	0	0	1	0	0	0	0	0	0	0	0	0	0	0	0	0	0	0	0	0	0	1	2
CHD4	CHD4_c.4013G>T	p.R1338I	12	6692411	C	A	FALSE	FALSE	template_unavailable	0	0	0	0	1	0	0	0	0	0	0	0	0	0	0	0	0	0	0	0	0	0	0	0	0	0	2	3
CHD4	CHD4_c.4217G>T	p.R1406L	12	6692033	C	A	FALSE	FALSE	template_unavailable	0	0	0	0	0	0	0	0	0	0	0	0	0	0	0	0	0	0	0	0	1	0	0	0	0	0	0	1
CHD4	CHD4_c.423T>G	p.D141E	12	6711141	A	C	FALSE	FALSE	template_unavailable	0	0	0	0	0	0	0	0	0	0	0	0	0	0	0	0	0	0	0	0	0	0	0	0	0	0	1	1
CHD8	CHD8_c.1439G>A	p.S480N	14	21878098	C	T	FALSE	FALSE	template_unavailable	0	0	0	0	0	0	0	0	0	0	0	0	0	0	0	0	0	0	0	0	0	0	0	0	0	0	1	1
CHD8	CHD8_c.2437C>T	p.R813C	14	21873401	G	A	FALSE	FALSE	template_unavailable	0	0	0	0	0	0	0	0	0	0	0	0	0	0	0	0	0	0	0	0	0	0	0	0	0	0	1	1
CHD8	CHD8_c.2708G>A	p.R903Q	14	21871345	C	T	FALSE	FALSE	template_unavailable	0	0	0	0	0	0	0	0	0	0	0	0	0	0	0	0	0	0	1	0	0	0	0	0	0	0	0	1
CHD8	CHD8_c.3221C>G	p.A1074G	14	21870120	G	C	FALSE	FALSE	template_unavailable	0	0	0	0	0	0	0	0	0	1	0	0	0	0	0	0	0	0	0	0	0	0	0	0	0	0	0	1
CHD8	CHD8_c.3342T>G	p.N1114K	14	21869225	A	C	FALSE	FALSE	template_unavailable	0	0	0	0	1	0	0	0	0	0	0	0	0	0	0	0	0	0	0	0	0	0	0	0	0	0	0	1
CHD8	CHD8_c.3971C>T	p.A1324V	14	21868149	G	A	FALSE	FALSE	template_unavailable	0	0	0	0	0	0	0	0	0	0	0	0	0	0	0	0	0	0	0	0	0	0	0	0	1	0	0	1
CHD8	CHD8_c.4130T>C	p.F1377S	14	21866066	A	G	FALSE	FALSE	template_unavailable	0	0	0	0	0	0	0	0	0	0	0	0	0	0	0	0	0	0	1	0	0	0	0	0	0	0	0	1
CHSY3	CHSY3_c.1884C>G	p.I628M	5	129520719	C	G	TRUE	TRUE	BRDN0000553678	0	0	0	0	0	0	0	0	0	0	0	1	0	0	0	0	0	0	0	0	0	0	0	0	0	0	0	1
CHSY3	CHSY3_c.1049G>A	p.R350H	5	129244016	G	A	TRUE	TRUE	BRDN0000553961	0	0	0	0	0	0	0	0	0	0	0	0	0	0	0	0	0	0	0	0	0	0	0	0	0	0	1	1
CHSY3	CHSY3_c.1864C>A	p.H622N	5	129520699	C	A	TRUE	FALSE	failed_QC	0	0	0	0	0	0	0	0	0	0	0	1	0	0	0	0	0	0	0	0	0	0	0	0	0	0	0	1
CIC	CIC_c.3302C>T	p.A1101V	19	42796844	C	T	FALSE	FALSE	template_unavailable	0	0	0	0	1	0	0	0	0	0	0	0	0	0	0	0	0	0	0	0	0	0	0	0	0	0	0	1
CIC	CIC_c.4166C>T	p.S1389F	19	42798212	C	T	FALSE	FALSE	template_unavailable	0	0	0	0	0	0	0	0	0	0	0	0	0	0	0	0	0	0	0	0	1	0	0	0	0	0	0	1
CIC	CIC_c.4249C>T	p.R1417C	19	42798378	C	T	FALSE	FALSE	template_unavailable	0	0	0	0	0	0	0	0	0	0	0	0	0	0	0	0	0	0	0	0	0	0	0	0	0	0	1	1
CIC	CIC_c.452C>T	p.A151V	19	42791392	C	T	FALSE	FALSE	template_unavailable	0	0	0	0	0	0	0	0	0	0	0	0	0	0	0	0	0	0	0	0	0	0	0	0	1	0	0	1
CIC	CIC_c.638G>A	p.R213Q	19	42791752	G	A	FALSE	FALSE	template_unavailable	0	0	0	0	0	0	0	0	0	0	0	0	0	0	0	0	0	0	0	0	0	0	0	0	0	0	1	1
CIC	CIC_c.644G>A	p.R215Q	19	42791758	G	A	FALSE	FALSE	template_unavailable	0	0	0	0	0	0	0	0	0	0	0	0	0	1	0	0	0	0	0	0	0	0	0	0	0	0	0	1
CMAS	CMAS_c.329G>A	p.R110Q	12	22208151	G	A	FALSE	FALSE	template_unavailable	0	0	0	0	2	0	0	0	0	0	0	0	0	0	0	0	0	0	0	0	0	0	0	0	0	0	1	3
CMAS	CMAS_c.820G>A	p.E274K	12	22214246	G	A	FALSE	FALSE	template_unavailable	0	0	0	0	1	0	0	0	0	0	0	0	0	0	0	0	0	0	0	0	0	0	0	0	0	0	0	1
CNBD1	CNBD1_c.1187T>G	p.L396R	8	88365898	T	G	TRUE	TRUE	BRDN0000552850	0	0	0	0	1	0	0	0	2	0	0	0	0	0	0	0	0	0	0	0	0	0	0	0	1	0	0	4
CNBD1	CNBD1_c.1276G>T	p.A426S	8	88365987	G	T	TRUE	TRUE	BRDN0000552883	0	0	0	0	0	0	0	0	0	0	0	0	0	0	0	0	0	0	0	0	0	0	0	0	0	0	1	1
CNBD1	CNBD1_c.1187T>C	p.L396P	8	88365898	T	C	TRUE	TRUE	BRDN0000552946	0	0	0	0	0	0	0	0	1	0	0	0	0	0	0	0	0	0	0	0	0	0	0	0	2	0	0	3
CNBD1	CNBD1_c.599A>T	p.Y200F	8	88249168	A	T	TRUE	TRUE	BRDN0000552950	0	0	0	0	0	0	0	0	0	0	0	0	0	0	1	0	0	0	0	0	0	0	0	0	0	0	0	1
CNBD1	CNBD1_c.1115G>A	p.S372N	8	88363985	G	A	TRUE	TRUE	BRDN0000552979	0	0	0	0	0	0	0	0	0	0	0	0	0	0	0	0	0	0	0	0	0	0	0	0	0	0	1	1
CNBD1	CNBD1_c.1028T>G	p.F343C	8	88298885	T	G	TRUE	TRUE	BRDN0000560760	0	0	0	0	0	0	0	0	0	0	0	0	0	0	0	0	0	0	0	0	0	0	0	0	0	0	1	1
COL11A1	COL11A1_c.1636C>G	p.P546A	1	103474066	G	C	FALSE	FALSE	template_unavailable	0	0	0	0	0	0	0	0	0	0	0	0	0	0	0	0	0	0	0	0	0	0	0	0	1	0	0	1
COL11A1	COL11A1_c.2126G>T	p.G709V	1	103467497	C	A	FALSE	FALSE	template_unavailable	0	0	0	0	1	0	0	0	0	0	0	0	0	0	0	0	0	0	0	0	0	0	0	0	0	0	0	1
COL11A1	COL11A1_c.2864G>A	p.G955E	1	103431095	C	T	FALSE	FALSE	template_unavailable	0	1	0	0	0	0	0	0	0	0	0	0	0	0	0	0	0	0	0	0	0	0	0	0	0	0	0	1
COL11A1	COL11A1_c.3193G>A	p.A1065T	1	103412488	C	T	FALSE	FALSE	template_unavailable	0	0	1	0	0	0	0	0	0	0	0	0	0	0	0	0	0	0	0	0	0	0	0	0	0	0	0	1
COL11A1	COL11A1_c.3371A>G	p.E1124G	1	103405896	T	C	FALSE	FALSE	template_unavailable	0	0	0	0	0	0	0	1	0	0	0	0	0	0	0	0	0	0	0	0	0	0	0	0	0	0	0	1
COL11A1	COL11A1_c.4111G>A	p.E1371K	1	103364526	C	T	FALSE	FALSE	template_unavailable	0	0	0	0	0	0	0	0	0	0	0	0	0	0	0	0	0	0	1	0	0	0	0	0	0	0	0	1
COL11A1	COL11A1_c.4678G>T	p.G1560C	1	103352543	C	A	FALSE	FALSE	template_unavailable	0	0	0	0	0	0	0	0	0	0	0	0	0	0	0	1	0	0	0	0	0	0	0	0	0	0	0	1
COL11A1	COL11A1_c.5387G>A	p.G1796E	1	103343609	C	T	FALSE	FALSE	template_unavailable	0	0	0	0	0	0	0	0	0	1	0	0	0	0	0	0	0	0	0	0	0	0	0	0	0	0	0	1
COL13A1	COL13A1_c.1102G>T	p.G368W	10	71681683	G	T	FALSE	FALSE	template_unavailable	0	0	0	0	0	0	0	0	0	0	0	0	0	0	0	0	0	0	0	0	0	0	0	0	0	0	1	1
COL13A1	COL13A1_c.1507G>A	p.G503S	10	71690165	G	A	FALSE	FALSE	template_unavailable	0	0	0	0	0	0	0	0	0	0	0	0	0	0	0	0	0	0	0	0	0	0	0	0	0	0	1	1
COL13A1	COL13A1_c.2018G>A	p.G673E	10	71707091	G	A	FALSE	FALSE	template_unavailable	0	0	0	0	0	0	0	0	0	0	0	0	0	0	0	0	0	0	1	0	0	0	0	0	0	0	0	1
COL13A1	COL13A1_c.675G>A	p.M225I	10	71657248	G	A	FALSE	FALSE	template_unavailable	0	0	0	0	0	0	0	0	0	0	0	0	0	0	0	0	0	0	0	0	0	0	0	0	1	0	0	1
COL19A1	COL19A1_c.1185A>G	p.I395M	6	70778329	A	G	FALSE	FALSE	template_unavailable	0	0	0	0	0	0	0	0	0	0	0	0	0	0	0	0	0	0	0	0	0	0	0	0	0	0	1	1
COL19A1	COL19A1_c.1190G>T	p.G397V	6	70778334	G	T	FALSE	FALSE	template_unavailable	0	0	0	0	0	0	0	0	1	0	0	0	0	0	0	0	0	0	0	0	0	0	0	0	0	0	0	1
COL19A1	COL19A1_c.1615C>A	p.P539T	6	70852701	C	A	FALSE	FALSE	template_unavailable	0	0	0	0	0	0	0	0	0	0	0	0	0	0	0	1	0	0	0	0	0	0	0	0	0	0	0	1
COL19A1	COL19A1_c.1922G>T	p.G641V	6	70859624	G	T	FALSE	FALSE	template_unavailable	0	0	0	0	0	0	0	0	0	0	1	0	0	0	0	0	0	0	0	0	0	0	0	0	0	0	0	1
COL19A1	COL19A1_c.2114G>T	p.G705V	6	70866053	G	T	FALSE	FALSE	template_unavailable	0	0	1	0	0	0	0	0	0	0	0	0	0	0	0	0	0	0	0	0	0	0	0	0	0	0	0	1
COL19A1	COL19A1_c.2746C>T	p.P916S	6	70890386	C	T	FALSE	FALSE	template_unavailable	0	0	0	0	0	0	0	0	0	0	0	0	0	0	0	0	0	0	1	0	0	0	0	0	0	0	0	1
COL19A1	COL19A1_c.2840G>T	p.G947V	6	70894791	G	T	FALSE	FALSE	template_unavailable	0	0	0	0	0	0	0	0	0	0	0	0	0	0	1	0	0	0	0	0	0	0	0	0	0	0	0	1
COL19A1	COL19A1_c.589A>C	p.T197P	6	70639515	A	C	FALSE	FALSE	template_unavailable	0	0	0	0	1	0	0	0	0	0	0	0	0	0	0	0	0	0	0	0	0	0	0	0	0	0	0	1
COL1A2	COL1A2_c.1419C>G	p.I473M	7	94041910	C	G	FALSE	FALSE	template_unavailable	0	0	1	0	0	0	0	0	0	0	0	0	0	0	0	0	0	0	0	0	0	0	0	0	0	0	0	1
COL1A2	COL1A2_c.1565C>T	p.P522L	7	94043009	C	T	FALSE	FALSE	template_unavailable	0	0	1	0	0	0	0	0	0	0	0	0	0	0	0	0	0	0	0	0	0	0	0	0	0	0	0	1
COL1A2	COL1A2_c.2081G>A	p.G694D	7	94049546	G	A	FALSE	FALSE	template_unavailable	0	0	0	0	0	0	0	0	0	0	0	0	0	0	0	0	0	0	1	0	0	0	0	0	0	0	0	1
COL1A2	COL1A2_c.2279G>A	p.G760E	7	94049944	G	A	FALSE	FALSE	template_unavailable	0	0	0	0	0	0	0	0	0	0	0	0	0	0	0	0	0	0	1	0	0	0	0	0	0	0	0	1
COL1A2	COL1A2_c.2539G>A	p.G847S	7	94052404	G	A	FALSE	FALSE	template_unavailable	0	0	0	0	0	0	0	0	0	0	0	0	0	0	1	0	0	0	0	0	0	0	0	0	0	0	0	1
COL1A2	COL1A2_c.2813G>A	p.R938H	7	94054953	G	A	FALSE	FALSE	template_unavailable	0	0	0	0	1	0	0	0	0	1	0	0	0	0	0	0	0	0	0	0	0	0	0	0	0	0	0	2
COL1A2	COL1A2_c.3392A>C	p.K1131T	7	94057063	A	C	FALSE	FALSE	template_unavailable	0	0	0	0	0	0	0	0	0	0	0	0	0	0	0	0	0	0	0	0	0	0	0	0	1	0	0	1
COL1A2	COL1A2_c.982G>A	p.G328S	7	94039080	G	A	FALSE	FALSE	template_unavailable	0	0	0	0	0	0	0	0	0	0	0	0	0	0	0	0	0	0	0	0	0	0	0	0	1	0	0	1
COL4A4	COL4A4_c.143G>C	p.G48A	2	228004926	C	G	FALSE	FALSE	template_unavailable	0	0	0	0	0	0	0	0	0	0	0	0	0	0	1	0	0	0	0	0	0	0	0	0	0	0	0	1
COL4A4	COL4A4_c.1768G>C	p.G590R	2	227945194	C	G	FALSE	FALSE	template_unavailable	0	0	0	0	0	0	0	0	0	0	0	0	0	0	1	0	0	0	0	0	0	0	0	0	0	0	0	1
COL4A4	COL4A4_c.2500G>A	p.G834R	2	227922200	C	T	FALSE	FALSE	template_unavailable	0	0	0	0	0	0	0	0	0	0	0	0	0	0	0	0	0	0	1	0	0	0	0	0	0	0	0	1
COL4A4	COL4A4_c.2681G>A	p.G894E	2	227920696	C	T	FALSE	FALSE	template_unavailable	0	0	0	0	0	0	0	0	0	0	0	0	0	0	0	0	0	0	1	0	0	0	0	0	0	0	0	1
COL4A4	COL4A4_c.2789G>A	p.G930D	2	227919381	C	T	FALSE	FALSE	template_unavailable	0	0	0	0	0	0	0	0	0	0	0	0	0	0	0	0	0	0	0	0	0	0	0	0	0	0	1	1
COL4A4	COL4A4_c.3215G>A	p.G1072E	2	227912265	C	T	FALSE	FALSE	template_unavailable	0	0	0	0	0	0	0	0	0	0	0	0	0	0	0	0	0	0	2	0	0	0	0	0	0	0	0	2
COL4A4	COL4A4_c.4226G>T	p.G1409V	2	227877004	C	A	FALSE	FALSE	template_unavailable	0	0	0	0	1	0	0	0	0	0	0	0	0	0	0	0	0	0	0	0	0	0	0	0	0	0	0	1
COL4A4	COL4A4_c.4314C>G	p.D1438E	2	227876916	G	C	FALSE	FALSE	template_unavailable	0	0	0	0	0	0	0	0	0	0	0	0	0	0	0	0	0	0	1	0	0	0	0	0	0	0	0	1
COPS2	COPS2_c.950C>A	p.A317D	15	49423011	G	T	TRUE	TRUE	BRDN0000553058	0	0	0	0	0	0	0	0	0	0	0	1	0	0	0	0	0	0	0	0	0	0	0	0	0	0	0	1
COPS2	COPS2_c.202G>A	p.G68R	15	49436468	C	T	TRUE	TRUE	BRDN0000560762	0	0	0	0	0	0	0	0	0	0	0	0	0	0	0	0	0	0	1	0	0	0	0	0	0	0	0	1
CPXCR1	CPXCR1_c.166G>T	p.A56S	23	88008581	G	T	TRUE	TRUE	BRDN0000552459	0	1	0	0	0	0	0	0	0	0	0	0	0	0	0	0	0	0	0	0	0	0	0	0	0	0	0	1
CPXCR1	CPXCR1_c.304T>C	p.S102P	23	88008719	T	C	TRUE	TRUE	BRDN0000552471	0	0	0	0	0	0	0	0	0	1	0	0	0	0	0	0	0	0	0	0	0	0	0	0	0	0	0	1
CPXCR1	CPXCR1_c.217G>A	p.E73K	23	88008632	G	A	TRUE	TRUE	BRDN0000552482	0	0	0	0	0	0	0	0	0	0	0	0	0	0	0	0	0	0	2	0	0	0	0	0	0	0	0	2
CPXCR1	CPXCR1_c.529T>C	p.Y177H	23	88008944	T	C	TRUE	FALSE	failed_QC	0	0	0	0	0	0	0	0	0	0	0	0	0	0	0	0	0	0	1	0	0	0	0	0	0	0	0	1
CPZ	CPZ_c.1424G>A	p.C475Y	4	8616146	G	A	TRUE	FALSE	failed_QC	0	0	0	0	0	0	0	0	0	0	0	0	0	0	0	0	0	0	0	0	0	0	0	0	0	0	1	1
CPZ	CPZ_c.1498G>A	p.E500K	4	8616220	G	A	TRUE	FALSE	failed_QC	0	0	0	0	0	0	0	0	0	0	0	0	0	0	0	0	0	0	2	0	0	0	0	0	0	0	0	2
CPZ	CPZ_c.613G>A	p.A205T	4	8605819	G	A	TRUE	FALSE	failed_QC	0	0	0	0	0	0	0	0	0	1	0	0	0	0	0	0	0	0	0	0	0	0	0	0	0	0	0	1
CPZ	CPZ_c.938G>A	p.R313K	4	8608495	G	A	TRUE	FALSE	failed_QC	0	0	0	0	0	0	0	0	0	0	0	0	0	0	0	0	0	0	1	0	0	0	0	0	0	0	0	1
CREBBP	CREBBP_c.3114A>G	p.I1038M	16	3817857	T	C	TRUE	FALSE	failed_QC	0	0	0	0	0	0	0	0	0	0	0	0	0	0	0	0	0	0	0	0	0	0	0	0	0	0	1	1
CREBBP	CREBBP_c.3419G>A	p.R1140Q	16	3808000	C	T	TRUE	FALSE	failed_QC	0	0	0	0	0	0	0	0	0	0	0	0	0	0	0	1	0	0	0	0	0	0	0	0	0	0	0	1
CREBBP	CREBBP_c.4193C>A	p.A1398D	16	3789666	G	T	TRUE	FALSE	failed_QC	0	0	0	0	0	0	0	1	0	0	0	0	0	0	0	0	0	0	0	0	0	0	0	0	0	0	0	1
CREBBP	CREBBP_c.4337G>A	p.R1446H	16	3788617	C	T	TRUE	FALSE	failed_QC	0	0	0	0	0	0	0	2	0	1	1	0	0	0	0	0	0	0	0	0	0	0	0	0	0	0	0	4
CREBBP	CREBBP_c.4337G>T	p.R1446L	16	3788617	C	A	TRUE	FALSE	failed_QC	0	0	0	0	0	0	0	0	0	0	0	0	0	0	0	0	1	0	0	0	0	0	0	0	0	0	0	1
CREBBP	CREBBP_c.4900G>T	p.V1634L	16	3781465	C	A	TRUE	FALSE	failed_QC	0	0	0	0	0	0	0	0	0	0	1	0	0	0	0	0	0	0	0	0	0	0	0	0	0	0	0	1
CREBBP	CREBBP_c.5048G>A	p.R1683H	16	3781317	C	T	TRUE	FALSE	failed_QC	0	0	0	0	1	0	0	0	0	0	0	0	0	0	0	0	0	0	0	0	0	0	0	0	0	0	0	1
CREBBP	CREBBP_c.6949C>A	p.Q2317K	16	3778099	G	T	TRUE	FALSE	failed_QC	0	0	0	0	0	0	0	0	0	0	0	0	0	0	0	0	0	0	0	0	0	0	0	0	0	0	1	1
CRNKL1	CRNKL1_c.1496G>A	p.R499H	20	20023120	C	T	FALSE	FALSE	template_unavailable	0	0	1	0	0	0	0	0	0	0	0	0	0	0	0	0	0	0	0	0	0	0	0	0	0	0	0	1
CRNKL1	CRNKL1_c.2146G>T	p.A716S	20	20018200	C	A	FALSE	FALSE	template_unavailable	0	0	0	0	0	0	0	0	0	0	0	0	0	0	1	0	0	0	0	0	0	0	0	0	0	0	0	1
CRNKL1	CRNKL1_c.376C>T	p.P126S	20	20033094	G	A	FALSE	FALSE	template_unavailable	0	0	0	0	0	0	0	0	0	0	0	0	0	0	0	0	0	0	1	0	0	0	0	0	0	0	0	1
CRNKL1	CRNKL1_c.422C>A	p.S141Y	20	20033048	G	T	FALSE	FALSE	template_unavailable	0	0	0	0	0	0	0	0	0	0	0	0	0	0	0	1	0	0	0	0	0	0	0	0	0	0	0	1
CSDE1	CSDE1_c.1968G>T	p.L656F	1	115263244	C	A	FALSE	FALSE	template_unavailable	0	0	0	0	0	0	0	0	0	0	0	0	0	0	0	0	0	0	0	0	1	0	0	0	0	0	0	1
CSDE1	CSDE1_c.2176C>T	p.R726C	1	115262240	G	A	FALSE	FALSE	template_unavailable	0	0	0	0	0	0	0	0	0	0	0	0	0	0	0	0	0	0	0	0	0	0	0	0	0	0	1	1
CSDE1	CSDE1_c.530T>G	p.M177R	1	115277115	A	C	FALSE	FALSE	template_unavailable	0	0	0	0	0	0	0	0	0	0	0	0	0	0	0	0	0	0	0	0	0	0	0	0	0	0	1	1
CSDE1	CSDE1_c.632T>A	p.F211Y	1	115276689	A	T	FALSE	FALSE	template_unavailable	0	0	0	0	0	0	0	0	0	0	0	1	0	0	0	0	0	0	0	0	0	0	0	0	0	0	0	1
CSMD1	CSMD1_c.2010A>G	p.I670M	8	3265485	T	C	FALSE	FALSE	template_unavailable	0	0	0	0	0	0	0	0	0	0	0	0	0	0	0	0	0	0	1	0	0	0	0	0	0	0	0	1
CSMD1	CSMD1_c.3230G>A	p.R1077H	8	3216751	C	T	FALSE	FALSE	template_unavailable	1	0	0	0	0	0	0	0	1	0	0	0	0	0	0	0	0	0	0	0	0	0	0	0	0	0	0	2
CSMD1	CSMD1_c.3658G>A	p.D1220N	8	3166002	C	T	FALSE	FALSE	template_unavailable	0	0	0	0	0	0	0	0	0	0	0	0	0	0	0	0	0	0	1	0	0	0	0	0	0	0	0	1
CSMD1	CSMD1_c.5429G>A	p.R1810Q	8	3046506	C	T	FALSE	FALSE	template_unavailable	0	0	0	0	0	0	0	0	0	0	0	0	0	0	0	0	0	0	1	0	0	0	0	0	0	0	0	1
CSMD1	CSMD1_c.6020T>C	p.L2007S	8	3008933	A	G	FALSE	FALSE	template_unavailable	0	0	0	0	0	0	0	0	0	0	0	0	0	0	0	0	0	0	1	0	0	0	0	0	0	0	0	1
CSMD1	CSMD1_c.8219G>A	p.G2740D	8	2855694	C	T	FALSE	FALSE	template_unavailable	0	0	0	0	0	0	0	0	0	0	0	0	0	0	0	0	0	0	0	0	0	0	0	0	1	0	0	1
CSMD1	CSMD1_c.941C>T	p.A314V	8	3566004	G	A	FALSE	FALSE	template_unavailable	0	0	0	0	0	0	0	0	0	0	0	1	0	0	0	0	0	0	0	0	0	0	0	0	0	0	0	1
CSMD1	CSMD1_c.9572C>T	p.S3191F	8	2820047	G	A	FALSE	FALSE	template_unavailable	0	0	0	0	0	0	0	0	0	0	0	0	0	0	0	0	0	0	2	0	0	0	0	0	0	0	0	2
CSMD3	CSMD3_c.10343C>A	p.T3448K	8	113256682	G	T	FALSE	FALSE	template_unavailable	0	0	0	0	0	0	0	0	0	0	0	0	0	0	1	0	0	0	0	0	0	0	0	0	0	0	0	1
CSMD3	CSMD3_c.10793G>T	p.G3598V	8	113243809	C	A	FALSE	FALSE	template_unavailable	0	0	0	0	0	0	0	0	0	0	0	0	0	0	1	0	0	0	0	0	0	0	0	0	0	0	0	1
CSMD3	CSMD3_c.11081T>C	p.V3694A	8	113237043	A	G	FALSE	FALSE	template_unavailable	0	0	0	0	0	0	0	0	0	0	0	0	0	0	0	1	0	0	0	0	0	0	0	0	0	0	0	1
CSMD3	CSMD3_c.1591G>A	p.E531K	8	113933898	C	T	FALSE	FALSE	template_unavailable	0	0	0	0	0	0	0	0	0	0	0	0	0	0	1	0	0	0	0	0	0	0	0	0	0	0	0	1
CSMD3	CSMD3_c.1661G>A	p.G554E	8	113871468	C	T	FALSE	FALSE	template_unavailable	0	0	0	0	0	0	0	0	0	0	0	0	0	0	0	0	0	0	2	0	0	0	0	0	0	0	1	3
CSMD3	CSMD3_c.305G>A	p.R102K	8	114326896	C	T	FALSE	FALSE	template_unavailable	0	0	0	0	0	0	0	0	0	1	0	0	0	0	0	0	0	0	0	0	0	0	0	0	0	0	0	1
CSMD3	CSMD3_c.3578G>A	p.R1193Q	8	113649183	C	T	FALSE	FALSE	template_unavailable	0	0	0	0	1	0	0	0	0	0	0	0	0	0	0	0	0	0	0	0	0	0	0	0	0	0	0	1
CSMD3	CSMD3_c.8361G>T	p.L2787F	8	113314101	C	A	FALSE	FALSE	template_unavailable	0	0	0	0	1	0	0	0	0	0	0	0	0	0	0	0	0	0	0	0	0	0	0	0	0	0	0	1
CSPP1	CSPP1_c.1861A>C	p.K621Q	8	68044259	A	C	FALSE	FALSE	template_unavailable	0	0	0	0	0	0	0	1	0	0	0	0	0	0	0	0	0	0	0	0	0	0	0	0	0	0	0	1
CSPP1	CSPP1_c.2035C>T	p.P679S	8	68049808	C	T	FALSE	FALSE	template_unavailable	0	0	0	0	0	0	0	0	0	0	0	0	0	0	0	0	0	0	1	0	0	0	0	0	0	0	0	1
CSPP1	CSPP1_c.2313G>T	p.K771N	8	68066353	G	T	FALSE	FALSE	template_unavailable	0	0	0	0	1	0	0	0	0	0	0	0	0	0	0	0	0	0	0	0	0	0	0	0	0	0	0	1
CSPP1	CSPP1_c.805G>A	p.E269K	8	68007717	G	A	FALSE	FALSE	template_unavailable	0	0	0	0	1	0	0	0	0	0	0	0	0	0	0	0	0	0	0	0	0	0	0	0	0	0	1	2
CSPP1	CSPP1_c.86C>T	p.A29V	8	67976719	C	T	FALSE	FALSE	template_unavailable	0	0	0	0	0	0	0	0	0	1	0	0	0	0	0	0	0	0	0	0	0	0	0	0	0	0	0	1
CT62	CT62_c.107C>T	p.S36F	15	71404515	G	A	FALSE	FALSE	template_unavailable	0	0	0	0	0	0	0	0	0	0	0	0	0	0	0	0	0	0	1	0	0	0	0	0	0	0	0	1
CTCF	CTCF_c.1654C>T	p.P552S	16	67662408	C	T	TRUE	TRUE	BRDN0000553198	0	0	0	0	0	0	0	0	0	0	0	0	0	0	0	1	0	0	0	0	0	0	0	0	0	0	0	1
CTCF	CTCF_c.1130G>A	p.R377H	16	67654643	G	A	TRUE	TRUE	BRDN0000553779	0	0	0	0	0	0	0	0	0	0	0	0	0	0	0	0	0	0	0	0	0	0	0	0	0	0	2	2
CTCF	CTCF_c.1129C>T	p.R377C	16	67654642	C	T	TRUE	TRUE	BRDN0000553834	0	0	0	0	0	0	0	0	0	0	0	0	0	0	0	0	0	0	0	0	0	0	0	0	0	0	2	2
CTCF	CTCF_c.1704T>A	p.N568K	16	67663303	T	A	TRUE	TRUE	BRDN0000554092	0	0	0	0	0	0	0	0	0	0	0	0	0	0	0	0	0	0	0	0	0	0	0	0	0	0	1	1
CTCF	CTCF_c.1024C>T	p.R342C	16	67650719	C	T	TRUE	FALSE	failed_QC	0	0	0	0	1	0	0	0	0	0	0	0	0	0	0	0	0	0	0	0	0	0	0	0	0	0	0	1
CTCF	CTCF_c.847C>T	p.R283C	16	67645919	C	T	TRUE	FALSE	failed_QC	0	0	1	0	0	0	0	0	0	0	0	0	0	0	0	0	0	0	0	0	0	0	0	0	0	0	0	1
CTNNB1	CTNNB1_c.104T>G	p.I35S	3	41266107	T	G	TRUE	TRUE	BRDN0000553500	0	0	0	0	0	0	0	0	0	0	0	0	0	0	0	0	0	0	0	0	0	0	0	0	0	0	2	2
CTNNB1	CTNNB1_c.106C>T	p.H36Y	3	41266109	C	T	TRUE	TRUE	BRDN0000553544	0	0	0	0	0	0	0	0	0	0	0	0	0	0	0	0	0	0	1	0	0	0	0	0	0	0	0	1
CTNNB1	CTNNB1_c.100G>A	p.G34R	3	41266103	G	A	TRUE	TRUE	BRDN0000553564	0	0	0	0	0	0	0	0	0	0	0	0	0	0	0	0	1	0	0	0	0	0	0	0	0	0	5	6
CTNNB1	CTNNB1_c.770C>T	p.T257I	3	41267186	C	T	TRUE	TRUE	BRDN0000553876	0	0	0	0	1	0	0	0	0	0	0	0	0	0	0	0	0	0	0	0	0	0	0	0	0	0	0	1
CTNNB1	CTNNB1_c.1604G>A	p.R535Q	3	41275709	G	A	TRUE	TRUE	BRDN0000553934	0	0	0	0	0	0	0	0	0	0	0	0	0	0	0	0	0	0	0	0	0	0	0	0	0	0	1	1
CTNNB1	CTNNB1_c.101G>A	p.G34E	3	41266104	G	A	TRUE	TRUE	BRDN0000554149	0	0	0	0	0	0	0	0	0	0	0	0	0	0	0	0	0	0	1	0	0	0	0	0	0	0	2	3
CTNNB1	CTNNB1_c.486C>A	p.D162E	3	41266689	C	A	TRUE	TRUE	BRDN0000554159	0	0	0	0	1	0	0	0	0	0	0	0	0	0	0	0	0	0	0	0	0	0	0	0	0	0	0	1
CTNNB1	CTNNB1_c.101G>T	p.G34V	3	41266104	G	T	TRUE	TRUE	BRDN0000560789	0	0	0	0	0	0	0	0	0	0	0	0	0	0	0	0	0	0	0	0	0	0	0	0	0	0	2	2
CYLC2	CYLC2_c.211C>T	p.R71C	9	105767007	C	T	TRUE	TRUE	BRDN0000552510	0	0	0	0	1	0	0	0	0	0	0	0	0	0	0	0	0	0	2	0	0	0	0	0	0	0	0	3
CYLC2	CYLC2_c.313G>T	p.V105F	9	105767109	G	T	TRUE	TRUE	BRDN0000552699	0	0	0	0	0	0	0	0	0	0	0	0	0	0	0	1	0	0	0	0	0	0	0	0	0	0	0	1
CYLC2	CYLC2_c.397G>A	p.E133K	9	105767310	G	A	TRUE	TRUE	BRDN0000552767	0	0	0	0	0	0	0	0	0	0	0	0	0	0	0	0	0	0	1	0	0	0	0	0	0	0	0	1
CYLC2	CYLC2_c.454G>A	p.E152K	9	105767367	G	A	TRUE	TRUE	BRDN0000552779	0	0	0	0	0	0	0	0	0	0	0	0	0	0	0	0	0	0	1	0	0	0	0	0	0	0	0	1
CYLC2	CYLC2_c.895G>T	p.D299Y	9	105767808	G	T	TRUE	TRUE	BRDN0000554082	0	0	0	0	0	0	0	0	0	0	0	0	0	0	1	0	0	0	0	0	0	0	0	0	0	0	0	1
CYLC2	CYLC2_c.5C>T	p.S2F	9	105757667	C	T	TRUE	FALSE	failed_QC	0	0	0	0	1	0	0	0	0	0	0	0	0	0	0	0	0	0	0	0	0	0	0	0	0	0	0	1
CYP3A5	CYP3A5_c.529G>A	p.G177R	7	99262930	C	T	TRUE	TRUE	BRDN0000552985	0	0	0	0	0	0	0	0	0	0	0	0	0	0	0	0	0	0	1	0	0	0	0	0	0	0	0	1
CYP3A5	CYP3A5_c.1006G>A	p.D336N	7	99258142	C	T	TRUE	TRUE	BRDN0000553054	0	0	0	0	0	0	0	0	0	0	0	0	0	0	0	0	0	0	1	0	0	0	0	0	0	0	0	1
DCAF4L2	DCAF4L2_c.1091C>T	p.P364L	8	88885109	G	A	TRUE	TRUE	BRDN0000552858	0	0	0	0	0	0	0	0	0	0	0	0	0	0	0	0	0	0	1	0	0	0	0	0	0	0	0	1
DCAF4L2	DCAF4L2_c.299G>T	p.G100V	8	88885901	C	A	TRUE	TRUE	BRDN0000552869	0	0	0	0	0	0	0	0	0	0	0	0	0	0	1	0	0	0	0	0	0	0	0	0	0	0	0	1
DCAF4L2	DCAF4L2_c.994G>T	p.V332L	8	88885206	C	A	TRUE	TRUE	BRDN0000552880	0	0	0	0	0	0	0	0	0	0	0	0	0	0	1	0	0	0	0	0	0	0	0	0	0	0	0	1
DCAF4L2	DCAF4L2_c.110T>A	p.L37H	8	88886090	A	T	TRUE	TRUE	BRDN0000552932	0	0	0	0	0	0	0	0	0	0	0	0	0	0	1	0	0	0	0	0	0	0	0	0	0	0	0	1
DCAF4L2	DCAF4L2_c.514C>T	p.R172C	8	88885686	G	A	TRUE	TRUE	BRDN0000554021	0	0	0	0	1	0	0	0	0	0	0	0	0	0	0	0	0	0	0	0	0	0	0	0	0	0	0	1
DCAF4L2	DCAF4L2_c.479C>T	p.P160L	8	88885721	G	A	TRUE	TRUE	BRDN0000560751	0	0	0	0	0	0	0	0	0	0	0	0	0	0	0	0	0	0	1	0	0	0	0	0	0	0	0	1
DCAF4L2	DCAF4L2_c.236C>T	p.A79V	8	88885964	G	A	TRUE	TRUE	BRDN0000560844	0	0	0	0	0	0	0	0	2	0	0	0	0	0	0	0	0	0	0	0	0	0	0	0	0	0	1	3
DDX3X	DDX3X_c.1060G>C	p.D354H	23	41204467	G	C	FALSE	FALSE	template_unavailable	0	0	0	0	0	0	0	0	0	0	0	0	0	0	0	0	1	0	0	0	0	0	0	0	0	0	0	1
DDX3X	DDX3X_c.1197A>C	p.E399D	23	41204683	A	C	FALSE	FALSE	template_unavailable	0	0	0	0	0	0	0	0	0	0	0	0	0	0	0	0	0	0	0	0	0	0	0	0	0	0	1	1
DDX3X	DDX3X_c.1583G>A	p.R528H	23	41205843	G	A	FALSE	FALSE	template_unavailable	0	0	0	0	0	0	0	0	0	0	0	0	0	0	0	0	1	0	0	0	0	0	0	0	0	0	1	2
DDX3X	DDX3X_c.1585A>C	p.I529L	23	41205845	A	C	FALSE	FALSE	template_unavailable	0	0	0	0	0	0	0	0	0	0	0	0	0	0	0	0	0	0	1	0	0	0	0	0	0	0	0	1
DIS3	DIS3_c.1145G>A	p.R382Q	13	73347916	C	T	FALSE	FALSE	template_unavailable	0	0	0	0	1	0	0	0	0	0	0	0	0	0	0	0	0	0	0	0	0	0	0	0	0	0	2	3
DIS3	DIS3_c.1462G>A	p.D488N	13	73346338	C	T	FALSE	FALSE	template_unavailable	0	0	0	0	0	0	0	0	0	0	0	0	0	0	1	0	0	1	0	0	0	0	0	0	0	0	0	2
DIS3	DIS3_c.2325T>A	p.F775L	13	73336078	A	T	FALSE	FALSE	template_unavailable	0	0	0	0	0	0	0	0	0	0	0	0	0	0	0	0	0	1	0	0	0	0	0	0	0	0	0	1
DIS3	DIS3_c.2333C>A	p.P778H	13	73336070	G	T	FALSE	FALSE	template_unavailable	0	0	0	0	0	0	0	0	0	0	0	0	0	0	0	0	0	0	0	0	0	0	0	0	0	0	1	1
DNAH10	DNAH10_c.1153G>A	p.E385K	12	124270398	G	A	FALSE	FALSE	template_unavailable	0	0	0	0	0	0	0	0	0	0	0	0	0	0	0	0	0	0	1	0	0	0	0	0	0	0	0	1
DNAH10	DNAH10_c.2939A>G	p.H980R	12	124297859	A	G	FALSE	FALSE	template_unavailable	0	0	0	0	0	0	0	0	0	0	0	0	0	0	0	0	0	0	0	0	0	0	0	0	0	0	1	1
DNAH10	DNAH10_c.3203C>T	p.S1068L	12	124298123	C	T	FALSE	FALSE	template_unavailable	0	0	0	0	0	0	0	0	0	0	0	0	0	0	0	0	0	0	0	0	0	0	0	0	1	0	0	1
DNAH10	DNAH10_c.3674G>A	p.R1225K	12	124305154	G	A	FALSE	FALSE	template_unavailable	0	0	0	0	0	0	0	0	0	0	0	0	0	0	0	0	0	0	1	0	0	0	0	0	0	0	0	1
DNAH10	DNAH10_c.4294G>A	p.E1432K	12	124317763	G	A	FALSE	FALSE	template_unavailable	0	0	0	0	1	0	0	0	0	1	0	1	0	0	0	0	0	0	0	0	0	0	0	0	0	0	2	5
DNAH10	DNAH10_c.5372C>T	p.T1791I	12	124330613	C	T	FALSE	FALSE	template_unavailable	0	0	0	0	0	0	0	0	0	0	0	0	0	0	0	0	0	0	1	0	0	0	0	0	0	0	0	1
DNAH10	DNAH10_c.5663G>A	p.R1888Q	12	124333344	G	A	FALSE	FALSE	template_unavailable	0	0	0	0	1	0	0	0	0	0	0	0	0	0	0	0	0	0	1	0	0	0	0	0	0	0	3	5
DNAH10	DNAH10_c.6850T>C	p.Y2284H	12	124352050	T	C	FALSE	FALSE	template_unavailable	0	0	0	0	0	0	0	0	0	0	0	0	0	0	0	0	0	0	0	0	0	0	0	0	1	0	0	1
DNAH12	DNAH12_c.1170C>G	p.H390Q	3	57488123	G	C	FALSE	FALSE	template_unavailable	0	0	0	0	0	0	0	0	0	1	0	0	0	0	0	0	0	0	0	0	0	0	0	0	0	0	0	1
DNAH12	DNAH12_c.1172G>T	p.W391L	3	57488121	C	A	FALSE	FALSE	template_unavailable	0	0	0	0	0	0	0	0	0	1	0	0	0	0	0	0	0	0	0	0	0	0	0	0	0	0	0	1
DNAH12	DNAH12_c.344G>T	p.W115L	3	57496642	C	A	FALSE	FALSE	template_unavailable	0	0	0	0	0	0	0	0	0	0	0	0	0	0	2	0	0	0	0	0	0	0	0	0	0	0	0	2
DNAJB5	DNAJB5_c.645C>G	p.I215M	9	34996695	C	G	TRUE	FALSE	failed_QC	0	1	0	0	0	0	0	0	0	1	0	0	0	0	0	0	0	0	0	0	0	0	0	0	0	0	0	2
DNAJC12	DNAJC12_c.532C>T	p.R178C	10	69556939	G	A	TRUE	TRUE	BRDN0000552406	0	0	0	0	0	0	0	0	0	0	1	0	0	0	0	0	0	0	1	0	0	0	0	0	0	0	0	2
DNASE2	DNASE2_c.544T>C	p.Y182H	19	12989361	A	G	TRUE	TRUE	BRDN0000552722	0	0	0	0	0	0	0	0	0	0	0	0	0	0	0	0	0	0	0	0	0	0	0	0	0	0	1	1
DNMT3A	DNMT3A_c.2237G>T	p.G746V	2	25463256	C	A	TRUE	TRUE	BRDN0000553363	0	0	0	0	0	0	0	0	0	0	0	0	0	0	1	0	0	0	0	0	0	0	0	0	0	0	0	1
DNMT3A	DNMT3A_c.1455G>C	p.Q485H	2	25468908	C	G	TRUE	TRUE	BRDN0000553976	0	0	0	0	0	0	0	0	0	0	0	0	0	0	0	1	0	0	0	0	0	0	0	0	0	0	0	1
DNMT3A	DNMT3A_c.2729C>T	p.A910V	2	25457158	G	A	TRUE	TRUE	BRDN0000554009	0	0	0	0	1	0	0	0	0	0	0	0	0	0	0	0	0	0	0	0	0	0	0	0	0	0	1	2
DNMT3A	DNMT3A_c.2162A>G	p.K721R	2	25463520	T	C	TRUE	FALSE	failed_QC	0	0	0	0	0	0	0	0	0	0	1	0	0	0	0	0	0	0	0	0	0	0	0	0	0	0	0	1
DNMT3A	DNMT3A_c.2645G>A	p.R882H	2	25457242	C	T	TRUE	FALSE	failed_QC	5	0	1	0	0	0	0	0	0	0	0	0	0	0	0	0	0	0	0	0	0	0	0	0	0	0	0	6
EDNRB	EDNRB_c.874T>C	p.F292L	13	78475270	A	G	TRUE	TRUE	BRDN0000552820	0	0	0	0	0	0	0	0	0	0	0	0	0	0	0	0	0	0	0	0	0	0	0	0	1	0	0	1
EDNRB	EDNRB_c.1045C>A	p.L349I	13	78474696	G	T	TRUE	TRUE	BRDN0000552916	0	0	0	0	1	0	0	0	0	0	0	0	0	0	0	0	0	0	0	0	0	0	0	0	0	0	0	1
EDNRB	EDNRB_c.781C>A	p.Q261K	13	78477311	G	T	TRUE	FALSE	failed_QC	0	0	0	0	0	0	0	0	1	0	0	0	0	0	0	0	0	0	0	0	0	0	0	0	0	0	0	1
EGFR	EGFR_c.2156G>A	p.G719D	7	55241708	G	A	TRUE	TRUE	BRDN0000553846	0	0	0	0	0	0	0	0	0	0	0	0	0	0	0	0	0	0	0	0	0	0	0	0	1	0	0	1
EGFR	EGFR_c.1864C>T	p.P622S	7	55233114	C	T	TRUE	TRUE	BRDN0000553960	0	0	0	0	0	0	0	0	0	0	0	0	0	0	0	0	0	0	1	0	0	0	0	0	0	0	0	1
EGFR	EGFR_c.866C>T	p.A289V	7	55221822	C	T	TRUE	TRUE	BRDN0000554353	0	0	0	0	0	0	0	0	0	13	0	0	0	1	0	0	0	0	0	0	0	0	0	0	0	0	0	14
EGFR	EGFR_c.1787C>G	p.P596R	7	55233037	C	G	TRUE	FALSE	failed_QC	0	0	0	0	0	0	0	0	0	1	0	0	0	0	0	0	0	0	0	0	0	0	0	0	0	0	0	1
EGFR	EGFR_c.1787C>T	p.P596L	7	55233037	C	T	TRUE	FALSE	failed_QC	0	0	0	0	1	0	0	0	0	0	0	0	0	0	0	0	0	0	0	0	0	0	0	0	0	0	0	1
EGFR	EGFR_c.2582T>A	p.L861Q	7	55259524	T	A	TRUE	FALSE	failed_QC	0	0	0	0	0	0	0	0	0	0	0	0	0	0	3	2	0	0	0	0	0	0	0	0	0	0	0	5
EGFR	EGFR_c.760T>A	p.F254I	7	55221716	T	A	TRUE	FALSE	failed_QC	0	0	0	0	0	0	0	0	0	1	0	0	0	0	0	0	0	0	0	0	0	0	0	0	0	0	0	1
EGFR	EGFR_c.866C>A	p.A289D	7	55221822	C	A	TRUE	FALSE	failed_QC	0	0	0	0	0	0	0	0	0	2	0	0	0	0	0	0	0	0	0	0	0	0	0	0	0	0	0	2
EIF1AX	EIF1AX_c.25G>C	p.G9R	23	20156732	C	G	TRUE	TRUE	BRDN0000552379	0	0	0	0	0	0	0	0	0	0	0	0	0	0	0	0	0	0	0	0	0	0	0	0	0	1	0	1
ELF1	ELF1_c.94C>T	p.P32S	13	41533131	G	A	TRUE	TRUE	BRDN0000553229	0	0	0	0	0	0	0	0	0	0	0	0	0	0	0	0	0	0	1	0	0	0	0	0	0	0	0	1
ELF1	ELF1_c.1460A>T	p.Q487L	13	41507961	T	A	TRUE	FALSE	failed_QC	0	0	0	0	0	0	0	0	0	0	0	0	0	0	1	0	0	0	0	0	0	0	0	0	0	0	0	1
ELF3	ELF3_c.995C>T	p.A332V	1	201983146	C	T	TRUE	TRUE	BRDN0000552452	0	0	0	0	0	0	0	0	0	0	0	0	0	0	0	0	0	0	0	0	0	0	0	0	1	0	0	1
ENDOG	ENDOG_c.802G>A	p.E268K	9	131584797	G	A	FALSE	FALSE	template_unavailable	0	0	0	0	0	0	0	0	0	0	0	0	0	0	0	0	0	0	0	0	0	0	0	0	0	0	1	1
EP300	EP300_c.1739G>A	p.R580Q	22	41533773	G	A	FALSE	FALSE	template_unavailable	0	0	0	0	1	0	0	0	0	0	0	0	0	0	0	0	0	0	0	0	0	0	0	0	1	0	1	3
EP300	EP300_c.3491G>A	p.C1164Y	22	41553402	G	A	FALSE	FALSE	template_unavailable	0	1	0	0	0	0	0	0	0	0	2	0	0	0	0	0	0	0	0	0	0	0	0	0	0	0	0	3
EP300	EP300_c.3602G>A	p.C1201Y	22	41556657	G	A	FALSE	FALSE	template_unavailable	0	0	0	0	0	0	0	0	0	1	0	0	0	0	0	0	0	0	0	0	0	0	0	0	0	0	0	1
EP300	EP300_c.4195G>A	p.D1399N	22	41565529	G	A	FALSE	FALSE	template_unavailable	0	0	0	0	0	0	0	0	0	0	4	0	0	0	0	2	1	0	0	0	0	0	0	0	0	0	0	8
EP300	EP300_c.4195G>T	p.D1399Y	22	41565529	G	T	FALSE	FALSE	template_unavailable	0	1	0	0	0	0	0	0	0	0	0	0	0	0	0	0	0	0	0	0	0	0	0	0	0	0	0	1
EP300	EP300_c.4581A>C	p.R1527S	22	41568631	A	C	FALSE	FALSE	template_unavailable	0	0	0	0	0	0	0	1	0	0	0	0	0	0	0	0	0	0	0	0	0	0	0	0	0	0	0	1
EP300	EP300_c.4880G>A	p.R1627Q	22	41572351	G	A	FALSE	FALSE	template_unavailable	0	0	0	0	0	0	0	0	0	0	0	0	0	0	1	0	0	0	0	0	0	0	0	0	0	0	0	1
EP300	EP300_c.4886C>T	p.A1629V	22	41572357	C	T	FALSE	FALSE	template_unavailable	0	0	0	0	1	0	0	0	0	0	0	0	0	0	0	0	0	0	0	0	0	0	0	0	0	0	2	3
ERBB2	ERBB2_c.545C>T	p.T182I	17	37865676	C	T	TRUE	TRUE	BRDN0000553579	0	0	0	0	0	0	0	0	0	0	1	0	0	0	0	0	0	0	0	0	0	0	0	0	0	0	0	1
ERBB2	ERBB2_c.2690G>A	p.R897Q	17	37881620	G	A	TRUE	TRUE	BRDN0000553856	0	0	0	0	0	0	0	0	0	0	0	0	0	0	0	0	0	0	0	0	0	0	0	0	0	0	1	1
ERBB2	ERBB2_c.2524G>A	p.V842I	17	37881332	G	A	TRUE	TRUE	BRDN0000553888	0	0	1	0	4	0	0	0	0	0	0	0	0	0	0	0	0	0	0	0	0	0	0	0	0	0	2	7
ERBB2	ERBB2_c.2264T>C	p.L755S	17	37880220	T	C	TRUE	FALSE	failed_QC	0	0	2	0	1	0	0	0	0	0	0	0	0	0	0	0	0	0	0	0	0	0	0	0	1	0	1	5
ERBB2	ERBB2_c.929C>T	p.S310F	17	37868208	C	T	TRUE	FALSE	failed_QC	0	1	2	0	0	0	0	0	0	0	0	0	0	0	1	0	0	0	0	0	1	0	0	0	2	0	0	8
ERBB2IP	ERBB2IP_c.2937C>G	p.I979M	5	65350083	C	G	TRUE	TRUE	BRDN0000553699	0	0	0	0	0	0	0	0	0	0	0	0	0	0	0	0	0	0	0	0	1	0	0	0	0	0	0	1
ERBB2IP	ERBB2IP_c.1387G>A	p.E463K	5	65338985	G	A	TRUE	TRUE	BRDN0000553838	0	0	0	0	0	0	0	0	0	0	0	0	0	0	0	0	0	0	1	0	0	0	0	0	0	0	0	1
ERBB2IP	ERBB2IP_c.3605G>A	p.R1202Q	5	65350751	G	A	TRUE	FALSE	failed_QC	0	0	0	0	1	0	0	0	0	0	0	0	0	0	0	0	0	0	0	0	0	0	0	0	0	0	0	1
ERO1L	ERO1L_c.613G>A	p.E205K	14	53133109	C	T	TRUE	FALSE	failed_QC	0	0	0	0	0	0	0	0	0	0	0	0	0	0	0	0	0	0	0	0	0	0	0	0	0	0	1	1
EYS	EYS_c.515A>T	p.Q172L	6	66204789	T	A	TRUE	TRUE	BRDN0000552999	0	0	0	0	0	0	0	0	0	0	0	0	0	0	1	0	0	0	0	0	0	0	0	0	0	0	0	1
EYS	EYS_c.77G>A	p.R26Q	6	66205227	C	T	TRUE	TRUE	BRDN0000553214	0	0	0	0	0	0	0	0	0	0	0	0	0	0	1	0	0	0	0	0	0	0	0	0	0	0	0	1
EYS	EYS_c.1760G>T	p.R587I	6	66044879	C	A	TRUE	TRUE	BRDN0000553225	0	0	0	0	1	0	0	0	0	0	0	0	0	0	0	0	0	0	0	0	0	0	0	0	0	0	0	1
EYS	EYS_c.1661G>C	p.C554S	6	66044978	C	G	TRUE	TRUE	BRDN0000553238	0	0	0	0	0	0	0	0	0	0	1	0	0	0	0	0	0	0	0	0	0	0	0	0	0	0	0	1
EYS	EYS_c.1396C>A	p.H466N	6	66063414	G	T	TRUE	TRUE	BRDN0000553293	0	0	0	0	0	0	0	0	0	0	0	1	0	0	0	0	0	0	0	0	0	0	0	0	0	0	0	1
EYS	EYS_c.805A>C	p.N269H	6	66200544	T	G	TRUE	TRUE	BRDN0000553679	0	0	0	0	0	0	0	0	2	0	0	0	0	0	0	0	0	0	0	0	0	0	0	0	0	0	0	2
EYS	EYS_c.1006T>C	p.F336L	6	66115117	A	G	TRUE	TRUE	BRDN0000553824	0	0	0	0	0	0	0	0	1	0	0	0	0	0	0	0	0	0	0	0	0	0	0	0	0	0	0	1
EYS	EYS_c.1205A>G	p.E402G	6	66094373	T	C	TRUE	FALSE	failed_QC	0	0	0	0	0	0	0	1	0	0	0	0	0	0	0	0	0	0	0	0	0	0	0	0	0	0	0	1
EZH2	EZH2_c.1590T>G	p.C530W	7	148512073	A	C	TRUE	FALSE	failed_QC	0	0	0	0	0	0	0	0	0	0	0	0	0	0	0	0	0	0	1	0	0	0	0	0	0	0	0	1
EZH2	EZH2_c.1921T>A	p.Y641N	7	148508728	A	T	TRUE	FALSE	failed_QC	0	0	0	0	0	0	0	1	0	0	0	0	0	0	0	0	0	0	2	0	0	0	0	0	0	0	0	3
EZH2	EZH2_c.1922A>T	p.Y641F	7	148508727	T	A	TRUE	FALSE	failed_QC	0	0	0	0	0	0	0	4	0	0	0	0	0	0	0	0	0	0	1	0	0	0	0	0	0	0	0	5
FAM116A	FAM116A_c.1280G>A	p.R427H	3	57619065	C	T	TRUE	TRUE	BRDN0000554133	0	0	0	0	1	0	0	0	0	0	0	0	0	0	0	0	0	0	0	0	0	0	0	0	0	0	0	1
FAM123B	FAM123B_c.1066A>G	p.T356A	23	63412101	T	C	FALSE	FALSE	template_unavailable	0	0	0	0	0	0	0	0	0	1	0	0	0	0	0	0	0	0	0	0	0	0	0	0	0	0	0	1
FAM123B	FAM123B_c.1118C>T	p.A373V	23	63412049	G	A	FALSE	FALSE	template_unavailable	0	0	1	0	0	0	0	0	0	0	0	0	0	0	0	0	0	0	0	0	0	0	0	0	0	0	0	1
FAM123B	FAM123B_c.1412A>G	p.Y471C	23	63411755	T	C	FALSE	FALSE	template_unavailable	0	0	0	0	0	0	0	0	0	0	0	0	0	0	1	0	0	0	0	0	0	0	0	0	0	0	0	1
FAM123B	FAM123B_c.1720C>T	p.R574W	23	63411447	G	A	FALSE	FALSE	template_unavailable	0	0	1	0	0	0	0	0	0	0	0	0	0	0	0	0	0	0	1	0	0	0	0	0	0	0	1	3
FAM123B	FAM123B_c.1895A>T	p.E632V	23	63411272	T	A	FALSE	FALSE	template_unavailable	0	0	0	0	0	0	0	0	0	0	0	0	0	0	0	0	0	0	0	0	0	0	0	0	0	0	1	1
FAM123B	FAM123B_c.428G>T	p.C143F	23	63412739	C	A	FALSE	FALSE	template_unavailable	0	0	0	0	0	0	0	0	0	0	0	0	0	0	0	1	0	0	0	0	0	0	0	0	0	0	0	1
FAM123B	FAM123B_c.526A>G	p.I176V	23	63412641	T	C	FALSE	FALSE	template_unavailable	0	0	0	0	1	0	0	0	0	0	0	0	0	0	0	0	0	0	0	0	0	0	0	0	0	0	0	1
FAM123B	FAM123B_c.592G>A	p.E198K	23	63412575	C	T	FALSE	FALSE	template_unavailable	0	1	0	0	0	0	0	0	0	0	0	0	0	0	0	0	0	0	0	0	0	0	0	0	0	0	0	1
FAM184A	FAM184A_c.1349A>G	p.K450R	6	119338093	T	C	FALSE	FALSE	template_unavailable	0	0	0	0	0	0	0	0	0	0	1	0	0	0	0	0	0	0	0	0	0	0	0	0	0	0	0	1
FAM184A	FAM184A_c.2016G>T	p.L672F	6	119324136	C	A	FALSE	FALSE	template_unavailable	0	0	0	0	0	0	0	0	0	0	0	0	0	0	0	1	0	0	0	0	0	0	0	0	0	0	0	1
FAM184A	FAM184A_c.2194G>A	p.E732K	6	119301410	C	T	FALSE	FALSE	template_unavailable	0	0	0	0	1	0	0	0	0	0	0	0	0	0	0	0	0	0	1	0	0	0	0	0	0	0	0	2
FAM184A	FAM184A_c.2864T>C	p.F955S	6	119295644	A	G	FALSE	FALSE	template_unavailable	0	0	0	0	0	0	0	0	0	0	0	0	0	0	0	0	0	0	0	0	0	0	0	0	0	0	1	1
FAM184A	FAM184A_c.896G>A	p.R299Q	6	119345242	C	T	FALSE	FALSE	template_unavailable	0	0	0	0	0	0	0	0	0	0	0	0	0	0	0	0	0	0	0	0	0	0	0	0	1	0	2	3
FAM196A	FAM196A_c.1196G>A	p.R399Q	10	128952176	C	T	TRUE	TRUE	BRDN0000552843	0	0	0	0	0	0	0	0	0	0	0	0	0	0	0	0	0	0	0	0	0	0	0	0	1	0	0	1
FAM196A	FAM196A_c.137A>G	p.Q46R	10	128974523	T	C	TRUE	TRUE	BRDN0000553003	0	0	0	0	0	0	0	0	0	0	0	0	0	0	0	0	0	0	0	0	0	0	0	0	1	0	0	1
FAM200A	FAM200A_c.1442G>A	p.S481N	7	99144589	C	T	TRUE	TRUE	BRDN0000553245	0	0	0	0	0	0	0	0	0	0	0	1	0	0	0	0	0	0	0	0	0	0	0	0	0	0	0	1
FAM47A	FAM47A_c.1073G>A	p.G358E	23	34149323	C	T	FALSE	FALSE	template_unavailable	0	0	0	0	0	0	0	0	0	0	0	0	0	0	0	0	0	1	0	0	0	0	0	0	0	0	0	1
FAM47A	FAM47A_c.1094C>T	p.A365V	23	34149302	G	A	FALSE	FALSE	template_unavailable	0	0	0	0	0	0	0	0	0	0	0	0	0	0	0	0	0	0	0	0	0	0	0	0	0	0	1	1
FAM47A	FAM47A_c.1132G>A	p.E378K	23	34149264	C	T	FALSE	FALSE	template_unavailable	0	0	0	0	0	0	0	0	0	0	1	0	0	0	0	0	0	0	2	0	0	0	0	0	0	0	0	3
FAM47A	FAM47A_c.1457G>T	p.R486L	23	34148939	C	A	FALSE	FALSE	template_unavailable	0	0	0	0	0	0	0	0	0	0	0	0	0	0	0	1	0	0	0	0	0	0	0	0	0	0	0	1
FAM47A	FAM47A_c.1707C>A	p.F569L	23	34148689	G	T	FALSE	FALSE	template_unavailable	0	0	0	0	0	0	0	0	0	0	0	0	0	0	0	0	0	0	0	0	0	0	0	0	0	0	1	1
FAM47A	FAM47A_c.215G>A	p.R72H	23	34150181	C	T	FALSE	FALSE	template_unavailable	0	0	0	0	0	0	0	0	0	0	1	0	0	0	0	0	0	0	0	0	1	0	0	0	0	0	0	2
FAM47A	FAM47A_c.2235C>A	p.S745R	23	34148161	G	T	FALSE	FALSE	template_unavailable	0	0	0	0	0	0	0	0	0	0	0	0	0	0	1	0	0	0	0	0	0	0	0	0	0	0	0	1
FAM47A	FAM47A_c.584C>T	p.P195L	23	34149812	G	A	FALSE	FALSE	template_unavailable	0	0	0	0	0	0	0	0	0	0	0	0	0	0	0	0	0	0	1	0	0	0	0	0	0	0	0	1
FAM5C	FAM5C_c.1274C>T	p.S425L	1	190068175	G	A	FALSE	FALSE	template_unavailable	0	0	0	0	0	0	0	0	0	0	0	0	0	0	0	0	0	0	1	0	0	0	0	0	0	0	1	2
FAM5C	FAM5C_c.1498C>A	p.L500M	1	190067951	G	T	FALSE	FALSE	template_unavailable	0	0	0	0	0	0	0	0	0	0	1	0	0	0	0	0	0	0	0	0	0	0	0	0	0	0	0	1
FAM5C	FAM5C_c.1804G>A	p.D602N	1	190067645	C	T	FALSE	FALSE	template_unavailable	0	0	0	0	0	0	0	0	0	0	0	0	0	0	1	0	0	0	0	0	0	0	0	0	0	0	0	1
FAM5C	FAM5C_c.1907A>G	p.N636S	1	190067542	T	C	FALSE	FALSE	template_unavailable	0	0	0	0	1	0	0	0	0	0	0	0	0	0	0	0	0	0	0	0	0	0	0	0	0	0	0	1
FAM5C	FAM5C_c.2120G>A	p.R707K	1	190067329	C	T	FALSE	FALSE	template_unavailable	0	0	0	0	0	0	0	0	0	0	0	0	0	0	0	0	0	0	1	0	0	0	0	0	0	0	0	1
FAM5C	FAM5C_c.2282C>T	p.T761M	1	190067167	G	A	FALSE	FALSE	template_unavailable	0	0	0	0	0	0	0	0	0	0	0	0	0	0	0	0	0	0	1	0	0	0	0	0	0	0	0	1
FAM5C	FAM5C_c.321C>A	p.F107L	1	190250796	G	T	FALSE	FALSE	template_unavailable	0	0	0	0	1	0	0	0	0	0	0	0	0	0	0	0	0	0	0	0	0	0	0	0	0	0	0	1
FAM5C	FAM5C_c.637G>A	p.G213S	1	190203589	C	T	FALSE	FALSE	template_unavailable	0	0	0	0	0	0	0	0	0	0	0	0	0	0	1	0	0	0	0	0	0	0	0	0	0	0	0	1
FAT1	FAT1_c.10681G>T	p.G3561C	4	187524999	C	A	FALSE	FALSE	template_unavailable	0	0	0	0	0	0	0	0	0	0	0	0	0	0	1	0	0	0	0	0	0	0	0	0	0	0	0	1
FAT1	FAT1_c.12037G>A	p.A4013T	4	187521118	C	T	FALSE	FALSE	template_unavailable	0	0	0	0	0	0	0	0	0	0	0	0	0	0	0	0	0	0	1	0	0	0	0	0	1	0	0	2
FAT1	FAT1_c.12434C>T	p.T4145M	4	187518260	G	A	FALSE	FALSE	template_unavailable	0	0	0	0	0	0	0	0	0	0	0	0	0	0	0	0	0	0	0	0	0	0	0	0	0	0	1	1
FAT1	FAT1_c.12980G>T	p.S4327I	4	187517714	C	A	FALSE	FALSE	template_unavailable	0	0	0	0	0	0	0	0	0	0	0	0	0	0	1	0	0	0	0	0	0	0	0	0	0	0	0	1
FAT1	FAT1_c.1582G>A	p.E528K	4	187629400	C	T	FALSE	FALSE	template_unavailable	0	0	0	0	0	0	0	0	0	0	0	0	0	0	0	0	0	0	0	0	0	0	0	0	0	0	1	1
FAT1	FAT1_c.517G>C	p.A173P	4	187630465	C	G	FALSE	FALSE	template_unavailable	0	0	0	0	0	0	0	0	0	0	1	0	0	0	0	0	0	0	0	0	0	0	0	0	0	0	0	1
FAT1	FAT1_c.742G>A	p.E248K	4	187630240	C	T	FALSE	FALSE	template_unavailable	0	0	0	0	0	0	0	0	0	0	0	0	0	0	0	0	0	0	0	0	0	0	0	0	0	0	1	1
FAT1	FAT1_c.7790G>T	p.R2597L	4	187539950	C	A	FALSE	FALSE	template_unavailable	0	0	0	0	0	0	0	0	0	0	0	0	0	0	0	1	0	0	0	0	0	0	0	0	0	0	0	1
FBXO15	FBXO15_c.1228G>A	p.E410K	18	71740773	C	T	TRUE	TRUE	BRDN0000552830	0	0	0	0	0	0	0	0	0	0	0	0	0	0	0	0	0	0	2	0	0	0	0	0	0	0	0	2
FBXO15	FBXO15_c.1096A>G	p.S366G	18	71740905	T	C	TRUE	TRUE	BRDN0000552925	0	0	0	0	0	0	0	1	0	0	0	0	0	0	0	0	0	0	0	0	0	0	0	0	0	0	0	1
FBXO16	FBXO16_c.149C>A	p.T50K	8	28321322	G	T	TRUE	TRUE	BRDN0000552621	0	0	0	0	0	0	0	0	0	1	0	0	0	0	0	0	0	0	0	0	0	0	0	0	0	0	0	1
FBXW7	FBXW7_c.1505C>T	p.A502V	4	153247297	G	A	TRUE	TRUE	BRDN0000553154	0	0	0	0	0	0	0	0	0	0	1	0	0	0	0	0	0	0	0	0	0	0	0	0	0	0	0	1
FBXW7	FBXW7_c.1973G>A	p.R658Q	4	153244184	C	T	TRUE	TRUE	BRDN0000553177	0	0	0	0	1	0	0	0	0	0	0	0	0	0	0	0	0	0	0	0	0	0	0	0	0	0	1	2
FBXW7	FBXW7_c.1393C>T	p.R465C	4	153249385	G	A	TRUE	TRUE	BRDN0000553255	0	0	0	0	4	0	0	0	1	0	0	0	0	0	0	0	0	0	0	0	0	0	0	0	3	0	3	11
FBXW7	FBXW7_c.1513C>T	p.R505C	4	153247289	G	A	TRUE	TRUE	BRDN0000553276	0	0	0	1	3	0	0	0	0	0	0	0	0	0	1	0	0	0	2	0	1	0	0	0	0	0	5	13
FBXW7	FBXW7_c.2066G>A	p.R689Q	4	153244091	C	T	TRUE	TRUE	BRDN0000553291	0	0	0	0	0	0	0	0	0	0	0	0	0	0	0	0	1	0	0	0	0	0	0	0	0	0	1	2
FBXW7	FBXW7_c.1385C>A	p.S462Y	4	153249393	G	T	TRUE	TRUE	BRDN0000553743	0	0	0	0	0	0	0	1	0	0	0	0	0	0	0	0	0	0	0	0	0	0	0	0	0	0	0	1
FBXW7	FBXW7_c.1394G>A	p.R465H	4	153249384	C	T	TRUE	TRUE	BRDN0000553789	0	0	0	1	8	0	0	1	0	0	0	0	0	0	0	1	0	0	0	0	1	0	0	0	0	0	5	17
FBXW7	FBXW7_c.1041A>G	p.I347M	4	153251965	T	C	TRUE	TRUE	BRDN0000553802	0	0	0	0	0	0	0	0	0	0	0	0	0	0	0	0	0	0	0	0	0	0	0	0	1	0	0	1
FERD3L	FERD3L_c.247G>A	p.G83R	7	19184739	C	T	FALSE	FALSE	template_unavailable	0	0	0	0	0	0	0	0	1	0	0	0	0	0	0	0	0	0	0	0	0	0	0	0	0	0	0	1
FERD3L	FERD3L_c.275C>A	p.P92H	7	19184711	G	T	FALSE	FALSE	template_unavailable	0	0	0	0	0	0	0	0	0	0	0	0	0	0	1	0	0	0	0	0	0	0	0	0	0	0	0	1
FERD3L	FERD3L_c.43G>C	p.D15H	7	19184943	C	G	FALSE	FALSE	template_unavailable	0	0	1	0	0	0	0	0	0	0	0	0	0	0	0	0	0	0	0	0	0	0	0	0	0	0	0	1
FGD6	FGD6_c.2740G>C	p.E914Q	12	95535261	C	G	FALSE	FALSE	template_unavailable	0	0	0	0	0	0	0	0	0	0	0	0	0	0	0	0	0	0	0	0	0	0	0	0	0	0	0	1
FGD6	FGD6_c.3512G>A	p.R1171K	12	95488456	C	T	FALSE	FALSE	template_unavailable	0	0	0	0	0	0	0	0	0	0	0	0	0	0	0	0	0	0	0	0	0	0	0	0	0	0	1	1
FGD6	FGD6_c.3824A>G	p.H1275R	12	95485509	T	C	FALSE	FALSE	template_unavailable	0	0	0	0	0	0	0	0	0	0	0	0	0	0	0	0	0	0	0	0	0	0	0	0	0	0	1	1
FGD6	FGD6_c.4006A>T	p.M1336L	12	95479657	T	A	FALSE	FALSE	template_unavailable	0	0	0	0	0	0	0	0	0	0	0	0	0	0	1	0	0	0	0	0	0	0	0	0	0	0	0	1
FGD6	FGD6_c.4168G>C	p.E1390Q	12	95478362	C	G	FALSE	FALSE	template_unavailable	0	0	0	0	0	0	0	0	0	0	1	0	0	0	0	0	0	0	0	0	0	0	0	0	0	0	0	1
FGF1	FGF1_c.130G>T	p.G44C	5	141993563	C	A	TRUE	TRUE	BRDN0000552300	0	0	0	0	0	0	0	0	0	0	0	0	0	0	1	0	0	0	0	0	0	0	0	0	0	0	0	1
FGFR2	FGFR2_c.493C>T	p.R165W	10	123310935	G	A	TRUE	TRUE	BRDN0000553317	0	0	0	0	0	0	0	0	0	0	0	0	0	0	0	0	0	0	0	0	0	0	0	0	0	0	1	1
FGFR2	FGFR2_c.758C>T	p.P253L	10	123279674	G	A	TRUE	TRUE	BRDN0000553329	0	0	0	0	0	0	0	0	0	0	0	0	0	0	1	0	0	0	0	0	0	0	0	0	0	0	0	1
FGFR2	FGFR2_c.752G>A	p.R251Q	10	123279680	C	T	TRUE	TRUE	BRDN0000553361	0	0	0	0	0	0	0	0	0	0	0	0	0	0	0	0	0	0	1	0	0	0	0	0	0	0	0	1
FGFR2	FGFR2_c.1151G>A	p.G384E	10	123274767	C	T	TRUE	TRUE	BRDN0000553675	0	0	0	0	0	0	0	0	0	0	0	0	0	0	0	0	0	0	1	0	0	0	0	0	0	0	0	1
FGFR2	FGFR2_c.758C>G	p.P253R	10	123279674	G	C	TRUE	TRUE	BRDN0000554112	0	0	0	0	0	0	0	0	0	0	0	0	0	0	0	0	0	0	0	0	0	0	0	0	0	0	1	1
FGFR2	FGFR2_c.1645A>C	p.N549H	10	123258036	T	G	TRUE	FALSE	failed_QC	0	0	0	0	0	0	0	0	0	0	0	0	0	0	0	0	0	0	0	0	0	0	0	0	0	0	2	2
FLG	FLG_c.11483C>T	p.S3828L	1	152275879	G	A	FALSE	FALSE	template_unavailable	0	0	0	0	0	0	0	0	0	0	0	0	0	0	0	0	0	0	0	0	0	0	0	0	1	0	0	1
FLG	FLG_c.11705C>A	p.P3902H	1	152275657	G	T	FALSE	FALSE	template_unavailable	0	0	0	0	0	0	0	0	0	1	0	0	0	0	0	0	0	0	0	0	0	0	0	0	0	0	0	1
FLG	FLG_c.2303C>T	p.A768V	1	152285059	G	A	FALSE	FALSE	template_unavailable	0	0	0	0	0	0	0	0	0	1	0	0	0	0	0	0	0	0	0	0	0	0	0	0	0	0	0	1
FLG	FLG_c.2663G>A	p.G888E	1	152284699	C	T	FALSE	FALSE	template_unavailable	0	0	0	0	0	0	0	0	0	0	0	0	0	0	0	0	0	0	2	0	0	0	0	0	0	0	0	2
FLG	FLG_c.4699C>T	p.R1567W	1	152282663	G	A	FALSE	FALSE	template_unavailable	0	0	0	0	0	0	0	0	0	0	0	0	0	0	0	0	0	0	0	0	1	0	0	0	0	0	0	1
FLG	FLG_c.5570G>A	p.G1857E	1	152281792	C	T	FALSE	FALSE	template_unavailable	0	0	0	0	0	0	0	0	0	0	0	0	0	0	0	0	0	0	1	0	0	0	0	0	0	0	0	1
FLG	FLG_c.7361C>T	p.T2454M	1	152280001	G	A	FALSE	FALSE	template_unavailable	0	0	0	0	0	0	0	0	0	0	0	0	0	0	0	0	0	0	0	0	0	0	0	0	0	0	1	1
FLG	FLG_c.9715C>A	p.H3239N	1	152277647	G	T	FALSE	FALSE	template_unavailable	0	0	0	0	0	0	0	0	0	0	0	0	0	0	1	0	0	0	0	0	0	0	0	0	0	0	0	1
FNDC3A	FNDC3A_c.1537G>A	p.G513S	13	49752710	G	A	TRUE	FALSE	failed_QC	0	1	0	0	0	0	0	0	0	0	0	0	0	0	0	0	0	0	0	0	0	0	0	0	0	0	0	1
FNDC3A	FNDC3A_c.745G>A	p.D249N	13	49710722	G	A	TRUE	FALSE	failed_QC	0	1	0	0	0	0	0	0	0	0	0	0	0	0	0	0	0	0	0	0	0	0	0	0	0	0	0	1
FNDC3A	FNDC3A_c.748A>G	p.T250A	13	49710725	A	G	TRUE	FALSE	failed_QC	0	0	0	0	0	0	0	0	0	0	0	0	0	0	0	1	0	0	0	0	0	0	0	0	0	0	0	1
FNIP1	FNIP1_c.1230G>A	p.M410I	5	131014841	C	T	FALSE	FALSE	template_unavailable	0	0	0	0	0	0	0	0	0	0	0	0	0	1	0	0	0	0	0	0	0	0	0	0	0	0	0	1
FNIP1	FNIP1_c.2953G>A	p.E985K	5	131006311	C	T	FALSE	FALSE	template_unavailable	0	0	0	0	0	0	0	0	0	0	0	0	0	0	0	0	0	0	1	0	0	0	0	0	0	0	2	3
FTH1	FTH1_c.481G>A	p.A161T	11	61732270	C	T	TRUE	TRUE	BRDN0000552279	0	0	0	0	0	0	0	0	0	0	0	0	0	0	0	0	0	0	1	0	0	0	0	0	0	0	0	1
GABRA6	GABRA6_c.713G>A	p.R238K	5	161117246	G	A	TRUE	TRUE	BRDN0000552874	0	0	0	0	0	0	0	0	0	0	0	0	0	0	0	0	0	0	1	0	0	0	0	0	0	0	0	1
GABRA6	GABRA6_c.523G>C	p.G175R	5	161116336	G	C	TRUE	TRUE	BRDN0000552885	0	0	0	0	0	0	0	0	0	0	0	0	0	0	1	0	0	0	0	0	0	0	0	0	0	0	0	1
GABRA6	GABRA6_c.634G>A	p.G212R	5	161116746	G	A	TRUE	TRUE	BRDN0000553040	0	0	0	0	0	0	0	0	0	0	0	0	0	0	0	0	0	0	1	0	0	0	0	0	0	0	0	1
GABRA6	GABRA6_c.964G>A	p.A322T	5	161119084	G	A	TRUE	TRUE	BRDN0000554072	0	0	0	0	0	0	0	0	0	0	0	0	0	0	0	0	0	0	0	1	0	0	0	0	0	0	0	1
GABRA6	GABRA6_c.1033C>T	p.P345S	5	161119153	C	T	TRUE	TRUE	BRDN0000560850	0	0	0	0	1	0	0	0	0	0	0	0	0	0	0	0	0	0	0	0	0	0	0	0	0	0	0	1
GABRA6	GABRA6_c.338C>T	p.T113M	5	161116067	C	T	TRUE	FALSE	failed_QC	0	0	0	0	0	0	0	0	0	1	0	0	0	0	0	0	0	0	0	0	0	0	0	0	0	0	0	1
GABRA6	GABRA6_c.467G>A	p.C156Y	5	161116280	G	A	TRUE	FALSE	failed_QC	0	0	0	0	0	0	0	0	0	0	0	0	0	0	0	0	0	0	0	0	0	0	0	0	0	0	1	1
GALNT14	GALNT14_c.1600G>T	p.V534F	2	31133826	C	A	TRUE	TRUE	BRDN0000553036	0	0	0	0	0	0	0	0	0	0	0	0	0	0	1	0	0	0	0	0	0	0	0	0	0	0	0	1
GALNT14	GALNT14_c.559G>A	p.A187T	2	31178579	C	T	TRUE	TRUE	BRDN0000553045	0	0	0	0	0	0	0	0	0	0	0	0	0	0	0	0	0	0	0	0	0	0	0	0	0	0	1	1
GALNT14	GALNT14_c.1450C>T	p.P484S	2	31135139	G	A	TRUE	TRUE	BRDN0000553235	0	0	0	0	0	0	0	0	0	0	0	0	0	0	0	0	0	0	2	0	0	0	0	0	0	0	0	2
GALNT14	GALNT14_c.855C>A	p.F285L	2	31165143	G	T	TRUE	TRUE	BRDN0000553668	0	0	0	0	0	0	0	0	0	0	0	0	0	0	1	0	0	0	0	0	0	0	0	0	0	0	0	1
GALNT14	GALNT14_c.1007G>A	p.R336Q	2	31154985	C	T	TRUE	TRUE	BRDN0000553727	0	0	0	0	0	0	0	0	0	0	0	0	0	0	0	0	0	0	0	0	0	0	0	0	1	0	0	1
GALNTL5	GALNTL5_c.926G>A	p.G309E	7	151704929	G	A	TRUE	TRUE	BRDN0000553001	0	0	0	0	0	0	0	0	0	0	0	0	0	0	0	0	0	0	1	0	0	0	0	0	0	0	0	1
GALNTL5	GALNTL5_c.663T>A	p.D221E	7	151699803	T	A	TRUE	TRUE	BRDN0000553690	0	0	0	0	0	0	0	0	0	0	1	0	0	0	0	0	0	0	0	0	0	0	0	0	0	0	0	1
GALNTL5	GALNTL5_c.691G>A	p.E231K	7	151699831	G	A	TRUE	FALSE	failed_QC	0	1	0	0	0	0	0	0	0	0	0	0	0	0	0	0	0	0	0	0	0	0	0	0	0	0	0	1
GATA3	GATA3_c.989G>A	p.R330K	10	8111503	G	A	TRUE	TRUE	BRDN0000552841	0	0	1	0	0	0	0	0	0	0	0	0	0	0	0	0	0	0	0	0	0	0	0	0	0	0	0	1
GATA3	GATA3_c.353C>T	p.S118F	10	8100379	C	T	TRUE	TRUE	BRDN0000553029	0	0	0	0	0	0	0	0	0	0	0	0	0	0	0	1	0	0	0	0	0	0	0	0	0	0	0	1
GATA3	GATA3_c.419C>T	p.S140F	10	8100445	C	T	TRUE	TRUE	BRDN0000554022	0	0	0	0	0	0	0	0	0	0	0	0	0	0	0	0	0	0	1	0	0	0	0	0	0	0	0	1
GATA3	GATA3_c.1092A>T	p.R364S	10	8115746	A	T	TRUE	FALSE	failed_QC	0	0	1	0	0	0	0	0	0	0	0	0	0	0	0	0	0	0	0	0	0	0	0	0	0	0	0	1
GATA3	GATA3_c.1223C>A	p.P408H	10	8115877	C	A	TRUE	FALSE	failed_QC	0	0	1	0	0	0	0	0	0	0	0	0	0	0	0	0	0	0	0	0	0	0	0	0	0	0	0	1
GATA3	GATA3_c.1326G>T	p.M442I	10	8115980	G	T	TRUE	FALSE	failed_QC	0	0	0	0	0	0	0	0	0	0	0	0	0	0	1	0	0	0	0	0	0	0	0	0	0	0	0	1
GCET2	GCET2_c.531T>G	p.H177Q	3	111842308	A	C	TRUE	TRUE	BRDN0000552346	0	0	0	0	0	0	0	0	0	0	0	0	0	0	0	0	0	0	0	0	0	0	0	0	0	0	1	1
GCNT7	GCNT7_c.1287C>A	p.N429K	20	55066619	G	T	FALSE	FALSE	template_unavailable	0	0	0	0	0	0	0	0	0	0	0	0	0	0	0	0	0	3	1	0	0	0	0	0	0	0	0	4
GDF6	GDF6_c.1150G>A	p.E384K	8	97157009	C	T	FALSE	FALSE	template_unavailable	0	0	0	0	0	0	0	0	0	0	0	0	0	0	0	0	0	0	0	0	0	0	0	0	0	0	1	1
GDF6	GDF6_c.1221G>A	p.M407I	8	97156938	C	T	FALSE	FALSE	template_unavailable	0	0	0	0	0	0	0	0	0	0	0	0	0	0	0	0	0	0	1	0	0	0	0	0	0	0	0	1
GEN1	GEN1_c.704T>G	p.L235R	2	17950072	T	G	TRUE	TRUE	BRDN0000553441	0	0	0	0	0	0	0	0	0	0	0	0	0	0	0	0	0	0	1	0	0	0	0	0	0	0	0	1
GEN1	GEN1_c.823C>T	p.R275C	2	17953921	C	T	TRUE	FALSE	failed_QC	0	0	0	0	0	0	0	0	0	1	0	0	0	0	0	0	0	0	0	0	0	0	0	0	0	0	0	1
GLB1L3	GLB1L3_c.1258C>A	p.L420M	11	134181035	C	A	FALSE	FALSE	template_unavailable	0	0	0	0	0	0	0	1	0	0	0	0	0	0	0	0	0	0	0	0	0	0	0	0	0	0	0	1
GLB1L3	GLB1L3_c.373T>A	p.W125R	11	134151281	T	A	FALSE	FALSE	template_unavailable	0	0	0	0	0	0	0	0	0	0	0	0	0	0	0	0	0	1	0	0	0	0	0	0	0	0	0	1
GLB1L3	GLB1L3_c.878G>T	p.R293I	11	134177019	G	T	FALSE	FALSE	template_unavailable	0	0	0	0	0	0	0	0	0	0	0	0	0	0	0	0	0	0	0	0	0	0	0	0	0	0	1	1
GLIPR1	GLIPR1_c.358G>A	p.E120K	12	75875797	G	A	TRUE	FALSE	failed_QC	0	0	0	0	0	0	0	0	0	0	0	0	0	0	0	0	0	0	2	0	0	0	0	0	0	0	0	2
GNA13	GNA13_c.1120C>A	p.L374I	17	63010389	G	T	TRUE	TRUE	BRDN0000552487	0	0	0	0	0	0	0	0	0	0	0	0	0	0	0	0	0	0	0	0	0	0	0	0	0	0	1	1
GPR141	GPR141_c.670C>A	p.Q224K	7	37780665	C	A	TRUE	TRUE	BRDN0000552501	0	0	0	0	0	0	0	0	0	0	0	0	0	0	0	1	0	0	0	0	0	0	0	0	0	0	0	1
GPR141	GPR141_c.17C>A	p.T6N	7	37780012	C	A	TRUE	TRUE	BRDN0000552513	0	0	0	0	0	0	0	0	0	0	0	0	0	0	0	1	0	0	0	0	0	0	0	0	0	0	0	1
GPR141	GPR141_c.799G>A	p.E267K	7	37780794	G	A	TRUE	TRUE	BRDN0000560731	0	0	0	0	0	0	0	0	0	0	0	0	0	0	0	0	0	0	4	0	0	0	0	0	0	0	2	6
GPR156	GPR156_c.2270G>T	p.R757L	3	119886054	C	A	TRUE	TRUE	BRDN0000553474	0	0	0	0	0	0	0	0	0	0	0	0	0	0	1	0	0	0	0	0	0	0	0	0	0	0	0	1
GPR156	GPR156_c.2288G>C	p.C763S	3	119886036	C	G	TRUE	TRUE	BRDN0000553482	0	0	1	0	0	0	0	0	0	0	0	0	0	0	0	0	0	0	0	0	0	0	0	0	0	0	0	1
GPR156	GPR156_c.1685C>A	p.A562D	3	119886639	G	T	TRUE	FALSE	failed_QC	0	0	0	0	0	0	0	0	0	0	0	0	0	0	0	0	0	0	0	0	0	0	0	0	0	0	1	1
GPR156	GPR156_c.1808G>T	p.R603L	3	119886516	C	A	TRUE	FALSE	failed_QC	0	0	0	0	0	0	0	0	0	0	0	0	0	0	1	0	0	0	0	0	0	0	0	0	0	0	0	1
GPS2	GPS2_c.305G>A	p.R102Q	17	7217622	C	T	TRUE	TRUE	BRDN0000552486	0	0	0	0	0	0	0	0	0	1	0	0	0	0	0	0	0	0	0	0	0	0	0	0	0	0	0	1
GPX5	GPX5_c.139G>A	p.A47T	6	28497279	G	A	FALSE	FALSE	template_unavailable	0	0	1	0	0	0	0	0	1	2	0	0	0	0	0	0	0	0	0	0	0	0	0	0	0	0	1	5
GPX5	GPX5_c.518C>T	p.P173L	6	28501796	C	T	FALSE	FALSE	template_unavailable	0	0	0	0	0	0	0	0	0	0	0	0	0	0	0	0	0	0	1	0	0	0	0	0	0	0	0	1
GZMA	GZMA_c.629G>A	p.G210E	5	54405850	G	A	TRUE	TRUE	BRDN0000552445	0	0	0	0	0	0	0	0	0	0	0	0	0	0	0	0	0	0	1	0	0	0	0	0	0	0	0	1
GZMA	GZMA_c.112C>A	p.H38N	5	54401343	C	A	TRUE	TRUE	BRDN0000552457	0	0	0	0	0	0	0	0	0	0	0	0	0	0	0	0	0	0	0	0	0	0	0	0	0	0	1	1
H2AFX	H2AFX_c.402G>C	p.K134N	11	118965703	C	G	TRUE	TRUE	BRDN0000552367	0	0	0	0	0	0	0	0	0	0	0	0	0	0	0	0	0	0	0	0	0	0	0	0	0	0	0	1
HAPLN1	HAPLN1_c.977G>A	p.S326N	5	82937403	C	T	TRUE	TRUE	BRDN0000553538	0	0	0	0	0	0	0	0	0	0	0	0	0	0	1	0	0	0	0	0	0	0	0	0	0	0	0	1
HAPLN1	HAPLN1_c.345G>C	p.K115N	5	82948399	C	G	TRUE	TRUE	BRDN0000554142	0	0	0	0	0	0	0	0	0	0	0	0	0	0	0	0	0	1	0	0	0	0	0	0	0	0	0	1
HAPLN1	HAPLN1_c.698C>A	p.P233H	5	82940259	G	T	TRUE	TRUE	BRDN0000554158	0	0	0	0	0	0	0	0	0	0	0	0	0	0	1	0	0	0	0	0	0	0	0	0	0	0	0	1
HAPLN1	HAPLN1_c.494C>A	p.P165Q	5	82940463	G	T	TRUE	FALSE	failed_QC	0	0	0	0	0	0	0	0	0	0	0	0	0	0	1	0	0	0	0	0	0	0	0	0	0	0	0	1
HAUS1	HAUS1_c.305C>T	p.A102V	18	43698246	C	T	TRUE	TRUE	BRDN0000552527	0	0	0	0	0	0	0	0	0	0	0	0	0	0	0	0	0	0	0	0	0	0	0	0	0	0	1	1
HERPUD2	HERPUD2_c.854G>A	p.R285Q	7	35674832	C	T	TRUE	TRUE	BRDN0000552751	0	0	0	0	0	0	0	0	0	0	0	0	0	0	0	0	0	0	0	0	1	0	0	0	0	0	0	1
HERPUD2	HERPUD2_c.137C>T	p.P46L	7	35733804	G	A	TRUE	TRUE	BRDN0000560753	0	0	0	0	0	0	0	0	0	0	0	0	0	0	1	0	0	0	0	0	0	0	0	0	0	0	0	1
HIST1H1E	HIST1H1E_c.179C>A	p.A60D	6	26156797	C	A	TRUE	TRUE	BRDN0000552360	0	0	0	0	0	0	0	0	0	0	0	0	0	0	1	0	0	0	0	0	0	0	0	0	0	0	0	1
HIST1H1E	HIST1H1E_c.295A>T	p.T99S	6	26156913	A	T	TRUE	FALSE	failed_QC	0	0	0	0	0	0	0	1	0	0	0	0	0	0	0	0	0	0	0	0	0	0	0	0	0	0	0	1
HIST1H3B	HIST1H3B_c.142G>T	p.A48S	6	26032147	C	A	TRUE	TRUE	BRDN0000552343	0	0	0	0	0	0	0	2	0	0	0	0	0	0	0	0	0	0	0	0	0	0	0	0	0	0	0	2
HIST1H3B	HIST1H3B_c.302T>G	p.L101W	6	26031987	A	C	TRUE	TRUE	BRDN0000554127	0	0	0	0	0	0	0	0	0	0	0	0	0	0	0	0	0	1	0	0	0	0	0	0	0	0	0	1
HLA-A	HLA-A_c.223T>C	p.W75R	6	29910683	T	C	TRUE	FALSE	failed_QC	0	0	0	0	0	0	0	0	0	0	1	0	0	0	0	0	0	0	0	0	0	0	0	0	0	0	0	1
HLA-A	HLA-A_c.490G>A	p.A164T	6	29911191	G	A	TRUE	FALSE	failed_QC	0	0	0	0	0	0	0	1	0	0	0	0	0	0	0	0	0	0	0	0	0	0	0	0	1	0	0	2
HMCN1	HMCN1_c.11201G>A	p.C3734Y	1	186083180	G	A	FALSE	FALSE	template_unavailable	0	0	0	0	0	0	0	0	0	0	0	0	0	0	0	0	0	0	0	0	0	0	0	0	0	0	1	1
HMCN1	HMCN1_c.11378G>A	p.R3793H	1	186084052	G	A	FALSE	FALSE	template_unavailable	0	0	0	0	0	0	0	0	0	1	0	0	0	0	0	0	0	0	0	0	0	0	0	0	0	0	0	1
HMCN1	HMCN1_c.14003G>A	p.R4668K	1	186113383	G	A	FALSE	FALSE	template_unavailable	0	1	0	0	0	0	0	0	0	0	0	0	0	0	0	0	0	0	0	0	0	0	0	0	0	0	0	1
HMCN1	HMCN1_c.14168G>A	p.R4723K	1	186113737	G	A	FALSE	FALSE	template_unavailable	0	0	0	0	0	0	0	0	0	1	0	0	0	0	0	0	0	0	0	0	0	0	0	0	0	0	0	1
HMCN1	HMCN1_c.15905G>C	p.R5302T	1	186143736	G	C	FALSE	FALSE	template_unavailable	0	0	0	0	0	0	0	0	0	0	0	0	0	0	0	1	0	0	0	0	0	0	0	0	0	0	0	1
HMCN1	HMCN1_c.398C>A	p.S133Y	1	185833660	C	A	FALSE	FALSE	template_unavailable	0	0	0	0	0	0	0	0	0	0	0	0	0	0	0	0	0	0	0	0	0	0	0	0	0	0	3	3
HMCN1	HMCN1_c.6317T>G	p.I2106S	1	186014832	T	G	FALSE	FALSE	template_unavailable	0	0	0	0	0	0	0	0	0	0	0	0	0	0	0	0	0	0	0	0	0	0	0	0	0	0	1	1
HMCN1	HMCN1_c.6756G>T	p.R2252S	1	186023012	G	T	FALSE	FALSE	template_unavailable	0	0	0	0	0	0	0	0	0	0	0	0	0	0	1	0	0	0	0	0	0	0	0	0	0	0	0	1
HRAS	HRAS_c.35G>A	p.G12D	11	534288	C	T	TRUE	TRUE	BRDN0000552290	0	1	0	0	0	0	0	0	0	0	3	0	0	0	0	0	0	0	0	0	0	0	0	0	0	0	0	4
HRAS	HRAS_c.175G>A	p.A59T	11	533881	C	T	TRUE	TRUE	BRDN0000552302	0	0	0	0	0	0	0	0	0	0	0	0	0	0	0	0	0	0	0	0	0	0	0	0	0	0	1	1
HRAS	HRAS_c.182A>T	p.Q61L	11	533874	T	A	TRUE	TRUE	BRDN0000552319	0	0	0	0	0	0	0	0	0	0	1	0	0	0	1	0	0	0	0	0	0	0	0	0	0	0	0	2
HRAS	HRAS_c.32C>A	p.A11D	11	534291	G	T	TRUE	TRUE	BRDN0000552324	0	0	0	0	0	0	0	0	0	0	1	0	0	0	0	0	0	0	0	0	0	0	0	0	0	0	0	1
HRAS	HRAS_c.181C>A	p.Q61K	11	533875	G	T	TRUE	TRUE	BRDN0000552345	0	1	0	0	0	0	0	0	0	0	1	0	0	0	0	1	0	0	1	0	0	0	0	0	0	2	0	6
HRAS	HRAS_c.34G>T	p.G12C	11	534289	C	A	TRUE	TRUE	BRDN0000552357	0	0	0	0	0	0	0	0	0	0	1	0	0	0	0	0	0	0	0	0	0	0	0	0	0	0	0	1
HRAS	HRAS_c.35G>C	p.G12A	11	534288	C	G	TRUE	TRUE	BRDN0000552369	0	0	0	0	0	0	0	0	0	0	2	0	0	0	0	0	0	0	0	0	0	0	0	0	0	0	0	2
HRAS	HRAS_c.182A>G	p.Q61R	11	533874	T	C	TRUE	TRUE	BRDN0000552426	0	0	0	0	0	0	0	0	0	0	0	0	0	0	0	0	0	0	0	0	0	0	0	0	0	9	0	9
HRH4	HRH4_c.509C>T	p.S170L	18	22056862	C	T	TRUE	TRUE	BRDN0000552511	0	0	0	0	0	0	0	0	0	0	0	0	0	0	0	0	0	0	2	0	0	0	0	0	0	0	0	2
HRH4	HRH4_c.344C>T	p.S115L	18	22048902	C	T	TRUE	TRUE	BRDN0000552804	0	0	0	0	0	0	0	0	0	0	1	0	0	0	0	0	0	0	0	0	0	0	0	0	0	0	0	1
HRNR	HRNR_c.1238G>A	p.R413H	1	152192867	C	T	FALSE	FALSE	template_unavailable	0	0	0	0	0	0	0	0	0	0	0	0	0	0	1	0	0	0	0	0	0	0	0	0	0	0	0	1
HRNR	HRNR_c.1284G>C	p.Q428H	1	152192821	C	G	FALSE	FALSE	template_unavailable	0	0	0	0	0	0	0	0	0	0	1	0	0	0	0	0	0	0	0	0	0	0	0	0	0	0	0	1
HRNR	HRNR_c.1448C>A	p.S483Y	1	152192657	G	T	FALSE	FALSE	template_unavailable	0	0	0	0	1	0	0	0	0	0	0	0	0	0	0	0	0	0	0	0	0	0	0	0	0	0	0	1
HRNR	HRNR_c.1697G>A	p.G566E	1	152192408	C	T	FALSE	FALSE	template_unavailable	0	0	0	0	0	0	0	0	0	0	0	0	0	0	0	0	0	0	1	0	0	0	0	0	0	0	0	1
HRNR	HRNR_c.2036G>A	p.G679E	1	152192069	C	T	FALSE	FALSE	template_unavailable	0	0	0	0	0	0	0	0	0	0	0	0	0	0	0	0	0	0	1	0	0	0	0	0	0	0	0	1
HRNR	HRNR_c.2687G>A	p.R896H	1	152191418	C	T	FALSE	FALSE	template_unavailable	0	0	0	0	0	0	0	0	0	1	0	0	0	0	0	0	0	0	0	0	0	0	0	0	0	0	0	1
HRNR	HRNR_c.6623C>A	p.S2208Y	1	152187482	G	T	FALSE	FALSE	template_unavailable	0	0	0	0	0	0	0	0	0	0	0	0	0	0	0	0	0	0	0	0	0	0	0	0	0	0	1	1
HRNR	HRNR_c.920C>T	p.P307L	1	152193185	G	A	FALSE	FALSE	template_unavailable	0	0	0	0	0	0	0	0	0	0	0	0	0	0	0	0	0	0	1	0	0	0	0	0	0	0	0	1
HTR3B	HTR3B_c.285G>T	p.W95C	11	113802506	G	T	TRUE	TRUE	BRDN0000553563	0	0	0	0	0	0	0	0	0	0	0	0	0	0	1	0	0	0	0	0	0	0	0	0	0	0	0	1
HTR3B	HTR3B_c.353T>C	p.I118T	11	113802574	T	C	TRUE	TRUE	BRDN0000554178	0	0	0	0	0	0	0	0	0	0	0	0	0	0	0	0	0	0	0	0	0	0	0	0	1	0	0	1
HTR4	HTR4_c.385T>C	p.Y129H	5	147902878	A	G	TRUE	TRUE	BRDN0000553355	0	0	0	0	0	0	0	0	0	0	0	0	0	0	0	0	0	0	0	0	0	0	0	0	1	0	0	1
HTR4	HTR4_c.314C>T	p.T105M	5	147928270	G	A	TRUE	TRUE	BRDN0000554179	0	0	0	0	0	0	0	0	1	0	0	0	0	0	0	0	0	0	0	0	0	0	0	0	0	0	1	2
IDH1	IDH1_c.97C>T	p.P33S	2	209116179	G	A	TRUE	TRUE	BRDN0000553497	0	0	0	0	1	0	0	0	0	0	0	0	0	0	0	0	0	0	2	0	0	0	0	0	0	0	0	3
IDH1	IDH1_c.395G>T	p.R132L	2	209113112	C	A	TRUE	TRUE	BRDN0000553509	0	0	0	0	0	0	0	0	0	0	0	0	0	0	0	0	0	0	1	0	0	0	0	0	0	0	0	1
IDH1	IDH1_c.395G>A	p.R132H	2	209113112	C	T	TRUE	TRUE	BRDN0000553531	4	1	0	0	0	1	0	0	0	18	0	0	0	75	0	0	0	0	0	0	0	0	1	0	0	0	0	100
IDH1	IDH1_c.568G>A	p.E190K	2	209108281	C	T	TRUE	TRUE	BRDN0000553575	0	0	0	0	0	0	0	0	0	0	1	0	0	0	0	0	0	0	0	0	0	0	0	0	0	0	0	1
IDH1	IDH1_c.394C>T	p.R132C	2	209113113	G	A	TRUE	TRUE	BRDN0000554145	3	0	0	0	1	0	0	0	0	1	0	0	0	3	0	0	1	2	8	0	0	0	0	0	0	0	0	19
IDH1	IDH1_c.394C>A	p.R132S	2	209113113	G	T	TRUE	TRUE	BRDN0000554175	0	0	0	0	0	0	0	0	0	0	0	0	0	2	0	0	0	1	0	0	0	0	0	0	0	0	0	3
IDH1	IDH1_c.394C>G	p.R132G	2	209113113	G	C	TRUE	FALSE	failed_QC	0	0	0	0	0	0	0	0	0	1	0	0	0	2	0	0	0	0	0	0	0	0	0	0	0	0	0	3
IDH1	IDH1_c.873G>A	p.M291I	2	209104705	C	T	TRUE	FALSE	failed_QC	0	1	0	0	0	0	0	0	0	0	0	0	0	0	0	0	0	0	0	0	0	0	0	0	0	0	0	1
IDH2	IDH2_c.410G>A	p.G137E	15	90631943	C	T	TRUE	TRUE	BRDN0000552832	0	0	0	0	0	0	0	0	0	0	0	0	0	0	0	0	0	0	1	0	0	0	0	0	0	0	0	1
IDH2	IDH2_c.515G>A	p.R172K	15	90631838	C	T	TRUE	TRUE	BRDN0000552895	2	0	0	0	0	0	0	0	0	0	0	0	0	4	0	0	0	0	0	0	0	0	0	0	0	0	0	6
IDH2	IDH2_c.804G>T	p.E268D	15	90630682	C	A	TRUE	TRUE	BRDN0000552906	0	0	0	0	0	0	0	0	0	0	0	0	0	0	0	0	0	0	0	0	0	0	0	0	0	0	1	1
IDH2	IDH2_c.1247C>T	p.A416V	15	90628072	G	A	TRUE	TRUE	BRDN0000552992	0	0	0	0	1	0	0	0	0	0	0	0	0	0	0	0	0	0	0	0	0	0	0	0	0	0	0	1
IDH2	IDH2_c.140C>T	p.A47V	15	90634852	G	A	TRUE	TRUE	BRDN0000553086	0	0	0	0	1	0	0	0	0	0	0	0	0	0	0	0	0	0	0	0	0	0	0	0	0	0	0	1
IDH2	IDH2_c.515G>T	p.R172M	15	90631838	C	A	TRUE	TRUE	BRDN0000554037	0	0	0	0	0	0	0	0	0	0	0	0	0	1	0	0	0	0	0	0	0	0	0	0	0	0	0	1
IDH2	IDH2_c.415A>T	p.I139F	15	90631938	T	A	TRUE	TRUE	BRDN0000554065	0	0	0	0	0	0	0	0	0	0	0	0	0	0	0	0	0	0	1	0	0	0	0	0	0	0	0	1
IDH2	IDH2_c.992C>T	p.T331M	15	90628595	G	A	TRUE	TRUE	BRDN0000560763	0	0	0	0	1	0	0	0	0	0	0	0	0	0	0	0	0	0	0	0	0	0	0	0	0	0	0	1
IER3	IER3_c.463G>A	p.A155T	6	30711721	C	T	TRUE	TRUE	BRDN0000552311	0	0	0	0	0	0	0	0	0	0	0	0	0	1	0	0	0	0	0	0	0	0	0	0	0	0	0	1
IFNAR2	IFNAR2_c.1544G>A	p.R515K	21	34635801	G	A	FALSE	FALSE	template_unavailable	0	0	0	0	0	0	0	0	1	0	0	0	0	0	0	0	0	0	0	0	0	0	0	0	0	0	0	1
IKZF5	IKZF5_c.403G>A	p.E135K	10	124754153	C	T	TRUE	TRUE	BRDN0000552763	0	0	0	0	0	0	0	0	0	0	0	0	0	0	0	0	0	0	0	0	0	0	0	0	0	0	1	1
ILKAP	ILKAP_c.182C>A	p.S61Y	2	239098610	G	T	TRUE	TRUE	BRDN0000552632	0	0	0	0	0	0	0	0	0	0	0	0	0	1	0	0	0	0	0	0	0	0	0	0	0	0	2	3
IRF4	IRF4_c.368A>G	p.K123R	6	394972	A	G	TRUE	TRUE	BRDN0000552969	0	0	0	0	0	0	0	0	0	0	0	0	0	0	0	0	0	3	0	0	0	0	0	0	0	0	0	3
IRF4	IRF4_c.287G>T	p.R96L	6	394891	G	T	TRUE	TRUE	BRDN0000552983	0	0	1	0	0	0	0	0	0	0	0	0	0	0	0	0	0	0	0	0	0	0	0	0	0	0	0	1
ISX	ISX_c.259A>G	p.T87A	22	35478540	A	G	TRUE	TRUE	BRDN0000552349	0	0	0	0	0	0	0	0	0	0	0	0	0	0	0	0	0	0	0	0	0	0	0	0	0	0	1	1
ISX	ISX_c.256C>T	p.R86C	22	35478537	C	T	TRUE	TRUE	BRDN0000552515	0	0	0	0	0	0	0	0	0	0	1	0	0	0	0	0	0	0	8	0	0	0	0	0	0	0	0	9
JAK2	JAK2_c.1211T>A	p.I404N	9	5065037	T	A	TRUE	FALSE	failed_QC	0	0	0	0	0	0	0	0	0	0	0	0	0	0	1	0	0	0	0	0	0	0	0	0	0	0	0	1
JAK2	JAK2_c.1687G>A	p.V563I	9	5072537	G	A	TRUE	FALSE	failed_QC	0	0	0	0	0	0	0	0	0	0	0	0	0	0	0	0	0	0	0	0	0	0	0	0	0	0	1	1
JAK2	JAK2_c.398G>A	p.R133Q	9	5044450	G	A	TRUE	FALSE	failed_QC	0	0	0	0	0	0	0	0	0	0	0	0	0	0	0	0	0	0	1	0	0	0	0	0	0	0	0	1
JAK2	JAK2_c.955G>A	p.D319N	9	5055687	G	A	TRUE	FALSE	failed_QC	0	0	0	0	1	0	0	0	0	1	0	0	0	0	0	0	0	0	0	0	0	0	0	0	0	0	1	3
JMJD5	JMJD5_c.688G>A	p.A230T	16	27226219	G	A	TRUE	TRUE	BRDN0000552976	0	0	0	0	0	0	0	0	0	0	0	0	0	0	0	0	0	0	0	0	0	0	0	0	1	0	0	1
JUB	JUB_c.1267C>T	p.H423Y	14	23444286	G	A	TRUE	FALSE	failed_QC	0	0	0	0	0	0	0	0	0	0	1	0	0	0	0	0	0	0	0	0	0	0	0	0	0	0	0	1
KDM5C	KDM5C_c.1009G>A	p.D337N	23	53243984	C	T	FALSE	FALSE	template_unavailable	0	0	0	0	0	0	0	0	0	0	1	0	0	0	0	0	0	0	0	0	0	0	0	0	0	0	0	1
KDM5C	KDM5C_c.1156G>C	p.E386Q	23	53241055	C	G	FALSE	FALSE	template_unavailable	0	0	0	0	0	0	0	0	0	0	0	0	0	0	0	1	0	0	0	0	0	0	0	0	0	0	1	2
KDM5C	KDM5C_c.1377A>C	p.K459N	23	53240703	T	G	FALSE	FALSE	template_unavailable	0	0	1	0	0	0	0	0	0	0	0	0	0	0	0	0	0	0	0	0	0	0	0	0	0	0	0	1
KDM5C	KDM5C_c.2042G>A	p.R681Q	23	53230751	C	T	FALSE	FALSE	template_unavailable	0	0	0	0	0	0	0	0	0	1	0	0	0	0	0	0	0	0	0	0	0	0	0	0	0	0	0	1
KDM5C	KDM5C_c.2189G>T	p.C730F	23	53228213	C	A	FALSE	FALSE	template_unavailable	0	0	0	0	0	0	0	0	0	0	0	1	0	0	0	0	0	0	0	0	0	0	0	0	0	0	0	1
KDM5C	KDM5C_c.476G>A	p.R159H	23	53247024	C	T	FALSE	FALSE	template_unavailable	0	0	0	0	0	0	0	0	0	0	0	0	0	0	0	0	0	0	0	0	0	0	0	0	1	0	0	1
KDM6A	KDM6A_c.1616C>G	p.S539C	23	44922755	C	G	FALSE	FALSE	template_unavailable	0	0	0	0	0	0	0	0	0	0	0	0	0	0	1	0	0	0	0	0	0	0	0	0	0	0	0	1
KDM6A	KDM6A_c.3571G>T	p.G1191C	23	44949010	G	T	FALSE	FALSE	template_unavailable	0	0	0	0	0	0	0	0	0	0	0	0	0	0	1	0	0	0	0	0	0	0	0	0	0	0	0	1
KDM6A	KDM6A_c.3646G>T	p.D1216Y	23	44949085	G	T	FALSE	FALSE	template_unavailable	0	0	0	0	0	0	0	0	0	0	0	0	0	0	0	0	1	0	0	0	0	0	0	0	0	0	0	1
KDM6A	KDM6A_c.389C>A	p.A130D	23	44870210	C	A	FALSE	FALSE	template_unavailable	0	0	0	0	0	0	0	0	0	0	0	0	0	0	0	0	0	0	0	0	0	0	0	0	0	0	1	1
KDM6A	KDM6A_c.952G>A	p.A318T	23	44918327	G	A	FALSE	FALSE	template_unavailable	0	0	0	0	0	0	0	0	0	1	0	0	0	0	0	0	0	0	0	0	0	0	0	0	0	0	0	1
KEAP1	KEAP1_c.134C>T	p.S45F	19	10610576	G	A	TRUE	TRUE	BRDN0000553161	0	0	0	0	0	0	0	0	0	0	0	0	0	0	0	0	0	0	0	0	0	0	0	0	1	0	0	1
KEAP1	KEAP1_c.1255G>T	p.G419W	19	10602323	C	A	TRUE	TRUE	BRDN0000553184	0	0	0	0	0	0	0	0	0	0	0	0	0	0	1	0	0	0	0	0	0	0	0	0	0	0	0	1
KEAP1	KEAP1_c.1833G>C	p.E611D	19	10597370	C	G	TRUE	TRUE	BRDN0000553205	0	0	0	0	0	0	0	0	0	0	0	0	0	0	1	0	0	0	0	0	0	0	0	0	0	0	0	1
KEAP1	KEAP1_c.1807G>T	p.G603W	19	10597396	C	A	TRUE	TRUE	BRDN0000553242	0	0	0	0	0	0	0	0	0	0	0	0	0	0	2	0	0	0	0	0	0	0	0	0	0	0	0	2
KEAP1	KEAP1_c.953C>T	p.P318L	19	10602625	G	A	TRUE	TRUE	BRDN0000553782	0	0	0	0	0	0	0	0	0	0	0	0	0	0	0	1	0	0	0	0	0	0	0	0	0	0	0	1
KEAP1	KEAP1_c.1409G>A	p.R470H	19	10600446	C	T	TRUE	TRUE	BRDN0000554114	0	0	0	0	0	0	0	0	0	0	1	0	0	0	1	0	0	0	0	0	0	0	0	0	0	0	0	2
KEAP1	KEAP1_c.425C>T	p.T142M	19	10610285	G	A	TRUE	TRUE	BRDN0000560861	0	0	0	0	0	0	0	0	0	0	0	0	0	0	1	0	0	0	0	0	0	0	0	0	0	0	0	1
KIF2B	KIF2B_c.1349G>T	p.G450V	17	51901743	G	T	TRUE	TRUE	BRDN0000553153	0	0	0	0	0	0	0	0	0	0	0	0	0	0	1	0	0	0	0	0	0	0	0	0	0	0	0	1
KIF2B	KIF2B_c.1511G>A	p.R504Q	17	51901905	G	A	TRUE	TRUE	BRDN0000553176	0	0	0	0	0	0	0	0	0	0	0	0	0	0	0	0	0	0	1	0	0	0	0	0	0	0	0	1
KIF2B	KIF2B_c.179G>T	p.W60L	17	51900573	G	T	TRUE	TRUE	BRDN0000553188	0	0	0	0	0	0	0	0	0	0	0	0	0	0	1	0	0	0	0	0	0	0	0	0	0	0	0	1
KIF2B	KIF2B_c.356T>C	p.I119T	17	51900750	T	C	TRUE	TRUE	BRDN0000553231	0	0	0	0	0	0	0	0	0	0	0	0	0	0	0	0	0	0	0	0	0	0	0	0	0	0	1	1
KIF2B	KIF2B_c.338C>T	p.T113M	17	51900732	C	T	TRUE	TRUE	BRDN0000553233	0	0	1	0	0	0	0	0	0	0	1	0	0	0	0	0	0	0	0	0	0	0	0	0	0	0	1	3
KIF2B	KIF2B_c.482A>G	p.E161G	17	51900876	A	G	TRUE	TRUE	BRDN0000553254	0	0	0	0	0	0	0	0	0	0	0	0	0	0	0	0	0	0	1	0	0	0	0	0	0	0	0	1
KIF2B	KIF2B_c.1290G>C	p.Q430H	17	51901684	G	C	TRUE	TRUE	BRDN0000553693	0	0	0	0	0	0	0	0	0	0	0	0	0	0	0	0	0	0	0	0	1	0	0	0	0	0	0	1
KIF2B	KIF2B_c.631G>A	p.E211K	17	51901025	G	A	TRUE	TRUE	BRDN0000553777	0	0	0	0	0	0	0	0	0	0	0	0	0	0	0	0	0	0	1	0	0	0	0	0	0	0	0	1
KIR3DL2	KIR3DL2_c.287G>A	p.R96Q	19	55363669	G	A	TRUE	TRUE	BRDN0000552993	0	0	0	0	0	0	0	0	0	0	1	0	0	0	0	0	0	0	0	0	0	0	0	0	0	0	0	1
KLF5	KLF5_c.1250C>T	p.S417L	13	73649900	C	T	FALSE	FALSE	template_unavailable	0	0	0	0	0	0	0	0	0	0	0	0	0	0	1	0	0	0	0	0	0	0	0	0	0	0	0	1
KLHDC1	KLHDC1_c.793G>T	p.G265C	14	50199504	G	T	TRUE	FALSE	failed_QC	0	0	0	0	0	0	0	0	0	0	0	0	0	0	1	0	0	0	0	0	0	0	0	0	0	0	0	1
KLHL8	KLHL8_c.1481G>T	p.G494V	4	88091287	C	A	FALSE	FALSE	template_unavailable	0	0	0	0	0	0	0	0	0	0	0	0	0	0	0	0	0	0	0	0	0	0	0	0	0	0	1	1
KLHL8	KLHL8_c.926G>A	p.R309Q	4	88104381	C	T	FALSE	FALSE	template_unavailable	0	0	0	0	0	0	0	0	0	0	0	0	0	0	0	0	0	0	0	0	0	0	0	0	0	0	1	1
KLRC2	KLRC2_c.520G>C	p.G174R	12	10584769	C	G	TRUE	TRUE	BRDN0000552361	0	0	0	0	0	0	0	0	0	0	0	1	0	0	0	0	0	0	0	0	0	0	0	0	0	0	0	1
KPNA3	KPNA3_c.461T>G	p.V154G	13	50299560	A	C	TRUE	TRUE	BRDN0000553016	0	0	0	0	0	0	0	0	0	0	1	0	0	0	0	0	0	0	0	0	0	0	0	0	0	0	0	1
KRAS	KRAS_c.34G>A	p.G12S	12	25398285	C	T	TRUE	TRUE	BRDN0000553331	0	0	0	0	3	0	0	0	2	0	0	0	0	0	2	0	0	0	0	0	0	0	0	0	0	0	1	8
KRAS	KRAS_c.99T>A	p.D33E	12	25398220	A	T	TRUE	TRUE	BRDN0000553346	0	0	0	0	0	0	0	0	0	0	0	0	0	0	1	0	0	0	0	0	0	0	0	0	0	0	0	1
KRAS	KRAS_c.35G>A	p.G12D	12	25398284	C	T	TRUE	TRUE	BRDN0000553411	2	0	0	0	31	0	0	0	1	1	0	0	1	0	8	0	0	3	1	0	0	6	0	0	3	0	16	74
KRAS	KRAS_c.184G>A	p.E62K	12	25380274	C	T	TRUE	TRUE	BRDN0000553423	0	0	0	0	0	0	0	0	0	0	0	0	0	0	0	0	0	0	1	0	0	0	0	0	0	0	0	1
KRAS	KRAS_c.176C>G	p.A59G	12	25380282	G	C	TRUE	TRUE	BRDN0000553443	0	0	0	0	0	0	0	0	0	0	0	1	0	0	0	0	0	2	0	0	0	0	0	0	0	0	0	3
KRAS	KRAS_c.35G>T	p.G12V	12	25398284	C	A	TRUE	TRUE	BRDN0000553456	2	0	2	0	23	0	0	0	0	0	0	0	0	0	19	0	0	1	0	0	2	6	0	0	0	1	12	68
KRAS	KRAS_c.34G>T	p.G12C	12	25398285	C	A	TRUE	TRUE	BRDN0000553468	0	0	1	0	6	0	0	0	0	0	0	0	0	0	50	0	0	0	0	0	0	1	0	0	3	0	3	64
KRAS	KRAS_c.35G>C	p.G12A	12	25398284	C	G	TRUE	TRUE	BRDN0000553487	0	0	0	0	3	0	0	1	0	0	0	0	0	0	9	0	0	4	0	0	0	0	0	0	0	0	5	22
KRT26	KRT26_c.5C>G	p.S2C	17	38928361	G	C	TRUE	TRUE	BRDN0000552981	0	1	0	0	0	0	0	0	0	0	0	0	0	0	0	0	0	0	0	0	0	0	0	0	0	0	0	1
KRT26	KRT26_c.923G>A	p.R308H	17	38926052	C	T	TRUE	FALSE	failed_QC	0	0	0	0	1	0	0	0	0	0	0	0	0	0	0	0	0	0	0	0	0	0	0	0	0	0	0	1
LCE1B	LCE1B_c.125C>T	p.S42F	1	152785047	C	T	TRUE	TRUE	BRDN0000552309	0	0	0	0	0	0	0	0	0	0	0	0	0	0	0	0	0	0	3	0	0	0	0	0	0	0	0	3
LCE1B	LCE1B_c.304G>T	p.G102C	1	152785226	G	T	TRUE	TRUE	BRDN0000554027	0	0	0	0	0	0	0	0	0	0	0	0	0	0	0	1	0	0	0	0	0	0	0	0	0	0	0	1
LNX1	LNX1_c.1690G>A	p.V564I	4	54343122	C	T	TRUE	TRUE	BRDN0000553300	0	0	0	0	0	0	0	0	0	0	0	0	0	0	0	0	0	0	0	0	0	0	0	0	0	0	1	1
LNX1	LNX1_c.1384C>T	p.R462C	4	54347988	G	A	TRUE	FALSE	failed_QC	0	0	0	0	1	0	0	0	0	0	0	0	0	0	0	0	0	0	0	0	0	0	0	0	0	0	0	1
LNX1	LNX1_c.680C>T	p.A227V	4	54373579	G	A	TRUE	FALSE	failed_QC	0	0	0	0	0	0	0	0	0	0	0	0	0	0	0	0	0	0	0	0	0	0	0	0	1	0	0	1
LONRF3	LONRF3_c.1402G>A	p.A468T	23	118124510	G	A	FALSE	FALSE	template_unavailable	0	0	0	0	0	0	0	0	0	0	0	0	0	0	0	1	0	0	0	0	0	0	0	0	0	0	0	1
LONRF3	LONRF3_c.1591C>T	p.L531F	23	118143149	C	T	FALSE	FALSE	template_unavailable	0	0	0	0	0	0	0	0	0	0	0	0	0	0	0	0	0	0	1	0	0	0	0	0	0	0	0	1
LONRF3	LONRF3_c.1760T>G	p.I587S	23	118145885	T	G	FALSE	FALSE	template_unavailable	0	0	0	0	0	0	0	0	0	0	0	0	0	0	0	0	0	0	0	0	0	0	0	0	0	0	1	1
LRP1B	LRP1B_c.12496C>T	p.R4166C	2	141081480	G	A	FALSE	FALSE	template_unavailable	0	0	0	0	1	0	0	0	0	0	0	0	0	0	0	1	0	0	1	0	0	0	0	0	0	0	0	3
LRP1B	LRP1B_c.13610C>T	p.A4537V	2	140992404	G	A	FALSE	FALSE	template_unavailable	0	0	0	0	0	0	0	0	0	1	0	0	0	0	0	0	0	0	0	0	0	0	0	0	0	0	2	3
LRP1B	LRP1B_c.2596G>T	p.G866C	2	141751612	C	A	FALSE	FALSE	template_unavailable	0	0	0	0	0	0	0	0	0	0	0	0	0	0	1	0	0	0	0	0	0	0	0	0	0	0	0	1
LRP1B	LRP1B_c.3770C>T	p.P1257L	2	141643901	G	A	FALSE	FALSE	template_unavailable	0	0	0	0	0	0	0	0	0	0	0	0	0	0	0	0	0	0	1	0	0	0	0	0	0	0	0	1
LRP1B	LRP1B_c.4009C>T	p.P1337S	2	141641546	G	A	FALSE	FALSE	template_unavailable	0	0	0	0	0	0	0	0	0	0	0	0	0	0	0	0	0	0	1	0	0	0	0	0	0	0	0	1
LRP1B	LRP1B_c.4354G>C	p.A1452P	2	141625384	C	G	FALSE	FALSE	template_unavailable	0	0	0	0	0	0	0	1	0	0	0	0	0	0	0	0	0	0	0	0	0	0	0	0	0	0	0	1
LRP1B	LRP1B_c.4844C>A	p.A1615E	2	141607766	G	T	FALSE	FALSE	template_unavailable	0	0	0	0	0	0	0	0	0	0	0	0	0	0	1	0	0	0	0	0	0	0	0	0	0	0	0	1
LRP1B	LRP1B_c.509G>A	p.R170K	2	142004878	C	T	FALSE	FALSE	template_unavailable	0	0	0	0	0	0	0	0	0	0	0	0	0	0	0	0	0	0	1	0	0	0	0	0	0	0	0	1
LRRC17	LRRC17_c.677T>G	p.V226G	7	102575037	T	G	FALSE	FALSE	template_unavailable	0	0	0	0	0	3	0	0	0	0	0	0	0	0	0	0	0	0	0	0	0	0	0	0	0	0	0	3
LRRC17	LRRC17_c.885G>T	p.K295N	7	102579989	G	T	FALSE	FALSE	template_unavailable	0	0	0	0	0	0	0	0	0	0	0	0	0	0	0	0	0	0	0	0	0	0	0	0	0	0	1	1
LRRFIP2	LRRFIP2_c.1618C>T	p.H540Y	3	37107382	G	A	FALSE	FALSE	template_unavailable	0	0	0	0	0	0	0	0	0	0	0	0	0	0	1	0	0	0	0	0	0	0	0	0	0	0	0	1
LRRFIP2	LRRFIP2_c.164G>A	p.R55Q	3	37170567	C	T	FALSE	FALSE	template_unavailable	0	0	0	0	0	0	0	0	0	0	0	0	0	0	0	0	0	0	0	0	0	0	0	0	1	0	0	1
MAGEC2	MAGEC2_c.254G>T	p.S85I	23	141291520	C	A	TRUE	TRUE	BRDN0000552464	0	0	0	0	0	0	0	0	0	0	0	0	0	0	1	0	0	0	0	0	0	0	0	0	0	0	0	1
MAGEC2	MAGEC2_c.805G>A	p.E269K	23	141290969	C	T	TRUE	TRUE	BRDN0000552688	0	0	0	0	0	0	0	0	0	0	0	0	0	0	0	0	0	0	1	0	0	0	0	0	0	0	0	1
MAGEC2	MAGEC2_c.221G>T	p.G74V	23	141291553	C	A	TRUE	TRUE	BRDN0000552700	0	0	0	0	0	0	0	0	0	0	0	0	0	0	0	1	0	0	0	0	0	0	0	0	0	0	0	1
MAGEC2	MAGEC2_c.859C>T	p.R287W	23	141290915	G	A	TRUE	TRUE	BRDN0000552768	0	0	0	0	0	0	0	0	0	1	0	0	0	0	0	0	0	0	1	0	0	0	0	0	0	0	0	2
MAGEC2	MAGEC2_c.43G>A	p.D15N	23	141291731	C	T	TRUE	TRUE	BRDN0000554056	0	0	0	0	0	0	0	0	0	0	0	0	0	0	0	0	0	0	0	0	0	0	0	0	0	0	1	1
MAGEC2	MAGEC2_c.460C>T	p.L154F	23	141291314	G	A	TRUE	FALSE	failed_QC	0	0	0	0	0	0	0	0	0	0	0	0	0	0	0	0	0	0	1	0	0	0	0	0	0	0	0	1
MAP2K1	MAP2K1_c.361T>A	p.C121S	15	66729153	T	A	TRUE	TRUE	BRDN0000553388	0	0	0	0	0	0	0	1	0	0	0	0	0	0	1	0	0	0	0	0	0	0	0	0	0	0	0	2
MAP2K1	MAP2K1_c.529C>A	p.L177M	15	66737006	C	A	TRUE	TRUE	BRDN0000553397	0	0	0	0	0	0	0	0	0	0	0	0	0	0	0	0	0	0	0	0	0	0	0	0	2	0	0	2
MAP2K1	MAP2K1_c.370C>T	p.P124S	15	66729162	C	T	TRUE	TRUE	BRDN0000553573	0	0	0	0	0	0	0	0	0	0	0	0	0	0	0	0	0	0	5	0	0	0	0	0	0	0	0	5
MAP2K1	MAP2K1_c.980G>C	p.S327T	15	66781572	G	C	TRUE	TRUE	BRDN0000553638	0	0	0	0	0	0	0	0	0	0	0	0	0	0	0	0	0	0	0	0	0	0	0	0	0	0	1	1
MAP2K1	MAP2K1_c.170A>C	p.K57T	15	66727454	A	C	TRUE	TRUE	BRDN0000553650	0	0	0	0	0	0	0	1	0	0	0	0	0	0	1	0	0	0	0	0	0	0	0	0	0	0	0	2
MAP2K1	MAP2K1_c.607G>A	p.E203K	15	66774131	G	A	TRUE	TRUE	BRDN0000554153	0	0	1	0	0	0	0	0	0	0	0	0	0	0	0	0	0	0	1	0	0	0	0	0	1	0	0	3
MAP2K1	MAP2K1_c.364A>G	p.N122D	15	66729156	A	G	TRUE	FALSE	failed_QC	0	0	0	0	0	0	0	1	0	0	0	0	0	0	0	0	0	0	0	0	0	0	0	0	1	0	0	2
MAP2K1	MAP2K1_c.880G>A	p.G294R	15	66777514	G	A	TRUE	FALSE	failed_QC	0	0	0	0	0	0	0	0	0	0	1	0	0	0	0	0	0	0	0	0	0	0	0	0	0	0	0	1
MAP2K4	MAP2K4_c.551C>T	p.S184L	17	12011144	C	T	TRUE	TRUE	BRDN0000553606	0	0	2	0	0	0	0	0	0	0	0	0	0	0	0	0	0	0	0	0	0	0	0	0	0	0	0	2
MAP2K4	MAP2K4_c.814C>T	p.P272S	17	12028611	C	T	TRUE	FALSE	failed_QC	0	0	0	0	0	0	0	0	0	0	0	0	0	0	0	0	0	0	0	0	0	0	0	0	1	0	0	1
MAP2K4	MAP2K4_c.868G>T	p.V290F	17	12028665	G	T	TRUE	FALSE	failed_QC	0	0	1	0	0	0	0	0	0	0	0	0	0	0	0	0	0	0	0	0	0	0	0	0	0	0	0	1
MAP2K5	MAP2K5_c.331C>T	p.P111S	15	67878236	C	T	TRUE	TRUE	BRDN0000553048	0	0	0	0	0	0	0	0	0	0	0	0	0	0	0	0	0	0	1	0	0	0	0	0	0	0	0	1
MAP3K1	MAP3K1_c.1363A>C	p.S455R	5	56167798	A	C	FALSE	FALSE	template_unavailable	0	0	0	0	0	0	0	0	0	0	0	0	0	0	0	0	0	0	0	0	0	0	0	0	0	0	1	1
MAP3K1	MAP3K1_c.1567G>A	p.V523I	5	56168713	G	A	FALSE	FALSE	template_unavailable	0	0	0	0	0	0	0	0	0	0	0	0	0	0	0	0	0	0	0	0	0	0	0	0	1	0	0	1
MAP3K1	MAP3K1_c.3989C>T	p.S1330L	5	56181765	C	T	FALSE	FALSE	template_unavailable	0	0	0	0	0	0	0	0	0	0	0	0	0	0	0	0	0	0	0	0	1	0	0	0	1	0	0	2
MAP3K1	MAP3K1_c.4310G>T	p.C1437F	5	56184105	G	T	FALSE	FALSE	template_unavailable	0	0	1	0	0	0	0	0	0	0	0	0	0	0	0	0	0	0	0	0	0	0	0	0	0	0	0	1
MAP3K1	MAP3K1_c.4472T>A	p.L1491H	5	56189440	T	A	FALSE	FALSE	template_unavailable	0	0	1	0	0	0	0	0	0	0	0	0	0	0	0	0	0	0	0	0	0	0	0	0	0	0	0	1
MAP3K1	MAP3K1_c.917G>A	p.R306H	5	56160643	G	A	FALSE	FALSE	template_unavailable	0	0	0	0	1	0	0	0	0	0	0	0	0	0	0	0	0	0	0	0	0	0	0	0	0	0	1	2
MAP4K3	MAP4K3_c.2258G>A	p.R753Q	2	39487797	C	T	TRUE	TRUE	BRDN0000553534	0	0	0	0	0	0	0	0	0	0	0	0	0	0	0	0	0	0	0	0	0	0	0	0	0	0	2	2
MAP4K3	MAP4K3_c.1419A>C	p.Q473H	2	39515317	T	G	TRUE	TRUE	BRDN0000553709	0	0	0	0	0	0	0	0	0	0	0	0	0	0	0	0	0	0	0	0	1	0	0	0	0	0	0	1
MAP4K3	MAP4K3_c.1606C>A	p.L536I	2	39509677	G	T	TRUE	TRUE	BRDN0000560893	0	0	0	0	1	0	0	0	0	0	0	0	0	0	0	0	0	0	0	0	0	0	0	0	0	0	0	1
MAP4K3	MAP4K3_c.1954C>T	p.P652S	2	39499443	G	A	TRUE	FALSE	failed_QC	0	0	0	0	0	0	0	0	0	0	0	0	0	0	0	0	0	0	1	0	0	0	0	0	0	0	0	1
MAPK1	MAPK1_c.955C>T	p.P319S	22	22127173	G	A	TRUE	FALSE	failed_QC	0	0	0	0	0	0	0	0	0	0	0	0	0	0	0	0	0	0	1	0	0	0	0	0	0	0	0	1
MAPK6	MAPK6_c.1159G>A	p.D387N	15	52356190	G	A	TRUE	TRUE	BRDN0000553933	0	0	0	0	0	0	0	0	0	0	0	0	0	0	0	0	0	0	1	0	0	0	0	0	0	0	0	1
MARCH11	MARCH11_c.900T>G	p.H300Q	5	16067889	A	C	FALSE	FALSE	template_unavailable	0	0	0	0	0	0	0	0	0	0	0	0	0	0	0	0	0	0	0	0	0	0	0	0	0	0	1	1
MARCH11	MARCH11_c.908C>A	p.A303D	5	16067881	G	T	FALSE	FALSE	template_unavailable	0	0	0	0	0	0	0	0	0	0	0	0	0	0	0	0	0	0	0	0	0	0	0	0	0	0	1	1
MARCH11	MARCH11_c.991G>A	p.E331K	5	16067798	C	T	FALSE	FALSE	template_unavailable	0	0	0	0	0	0	0	0	0	0	0	0	0	0	0	0	0	0	1	0	0	0	0	0	1	0	0	2
MED12	MED12_c.1240A>G	p.T414A	23	70342188	A	G	FALSE	FALSE	template_unavailable	0	0	0	0	0	0	0	0	0	0	0	1	0	0	0	0	0	0	0	0	0	0	0	0	0	0	0	1
MED12	MED12_c.1562G>A	p.R521H	23	70343021	G	A	FALSE	FALSE	template_unavailable	0	0	0	0	0	0	0	0	0	0	0	0	0	0	0	0	0	0	0	0	0	0	0	0	0	0	2	2
MED12	MED12_c.2047G>C	p.D683H	23	70344686	G	C	FALSE	FALSE	template_unavailable	0	0	0	0	0	0	0	0	0	0	0	0	0	0	0	0	0	0	0	0	0	0	0	0	1	0	0	1
MED12	MED12_c.3670C>T	p.L1224F	23	70349258	C	T	FALSE	FALSE	template_unavailable	0	0	1	0	0	0	0	0	0	0	0	0	0	0	0	0	0	0	0	0	0	0	4	0	1	0	0	6
MED12	MED12_c.3677C>A	p.A1226D	23	70349265	C	A	FALSE	FALSE	template_unavailable	0	0	0	0	0	0	0	0	0	0	0	0	0	1	0	0	0	0	0	0	0	0	0	0	0	0	0	1
MED12	MED12_c.4236G>C	p.K1412N	23	70352039	G	C	FALSE	FALSE	template_unavailable	0	0	1	0	0	0	0	0	0	0	0	0	0	0	0	0	0	0	0	0	0	0	0	0	0	0	0	1
MED12	MED12_c.514G>C	p.E172Q	23	70339981	G	C	FALSE	FALSE	template_unavailable	0	1	0	0	0	0	0	0	0	0	0	0	0	0	0	0	0	0	0	0	0	0	0	0	0	0	0	1
MED12	MED12_c.97G>A	p.E33K	23	70338701	G	A	FALSE	FALSE	template_unavailable	0	1	0	1	0	0	0	0	0	0	0	0	0	0	0	0	0	0	1	0	0	0	0	0	0	0	0	3
MEF2C	MEF2C_c.26C>T	p.T9M	5	88119580	G	A	TRUE	TRUE	BRDN0000553566	0	0	0	0	0	0	0	0	0	0	0	0	0	0	0	0	0	0	0	0	0	0	0	0	0	0	1	1
MEF2C	MEF2C_c.373G>T	p.D125Y	5	88057031	C	A	TRUE	FALSE	failed_QC	0	0	0	0	0	0	0	0	0	0	0	0	0	0	1	0	0	0	0	0	0	0	0	0	0	0	0	1
MET	MET_c.638C>T	p.S213L	7	116339776	C	T	TRUE	TRUE	BRDN0000553515	0	0	0	0	1	0	0	0	0	0	0	0	0	0	0	0	0	0	1	0	0	0	0	0	0	0	0	2
MET	MET_c.1406G>A	p.R469Q	7	116380017	G	A	TRUE	TRUE	BRDN0000553877	0	0	0	0	0	0	0	0	0	0	0	0	0	0	0	0	0	0	2	0	0	0	0	0	0	0	1	3
MET	MET_c.788C>T	p.T263M	7	116339926	C	T	TRUE	TRUE	BRDN0000553879	0	0	0	0	0	0	0	0	0	0	0	0	0	0	0	0	0	0	0	0	0	0	0	0	0	0	1	1
MET	MET_c.1640G>A	p.R547Q	7	116381018	G	A	TRUE	FALSE	failed_QC	0	0	0	0	0	0	0	0	0	0	0	0	0	0	0	0	0	0	1	0	0	0	0	0	0	0	0	1
MET	MET_c.2980G>A	p.E994K	7	116411995	G	A	FALSE	FALSE	template_unavailable	0	0	0	0	0	0	0	0	0	0	0	0	0	0	0	0	0	0	1	0	0	0	0	0	0	0	0	1
MET	MET_c.3418C>T	p.L1140F	7	116418907	C	T	FALSE	FALSE	template_unavailable	0	0	0	0	0	0	0	0	0	0	0	0	0	0	0	0	0	0	1	0	0	0	0	0	0	0	0	1
MFAP4	MFAP4_c.164A>C	p.Y55S	17	19289699	T	G	TRUE	TRUE	BRDN0000552526	0	0	0	0	0	0	0	0	0	0	0	0	0	0	0	0	0	0	0	0	0	0	0	0	0	0	1	1
MGA	MGA_c.1577C>T	p.S526L	15	41988785	C	T	FALSE	FALSE	template_unavailable	0	0	0	0	0	0	0	0	0	0	0	1	0	0	0	0	0	0	0	0	0	0	0	0	0	0	0	1
MGA	MGA_c.3154T>A	p.C1052S	15	42005418	T	A	FALSE	FALSE	template_unavailable	0	0	0	0	0	0	0	0	0	0	0	0	0	0	0	0	0	0	0	0	0	0	1	0	0	0	0	1
MGA	MGA_c.3719G>A	p.R1240Q	15	42021423	G	A	FALSE	FALSE	template_unavailable	0	0	0	0	1	0	0	0	0	0	0	0	0	0	0	0	0	0	0	0	0	0	0	0	0	0	0	1
MGA	MGA_c.4193C>G	p.S1398C	15	42028655	C	G	FALSE	FALSE	template_unavailable	0	1	0	0	0	0	0	0	0	0	0	0	0	0	0	0	0	0	0	0	0	0	0	0	0	0	0	1
MGA	MGA_c.5453G>A	p.R1818Q	15	42041075	G	A	FALSE	FALSE	template_unavailable	0	0	0	0	0	0	0	0	0	1	0	0	0	0	0	0	0	1	0	0	0	0	0	0	0	0	0	2
MGA	MGA_c.5978T>G	p.V1993G	15	42041783	T	G	FALSE	FALSE	template_unavailable	0	0	0	0	0	0	0	0	0	0	0	0	0	0	0	0	0	0	0	0	0	0	0	0	1	0	0	1
MGA	MGA_c.7304G>A	p.R2435Q	15	42052633	G	A	FALSE	FALSE	template_unavailable	0	0	0	0	1	0	0	0	0	0	0	0	0	0	0	0	0	0	0	0	2	0	0	0	0	0	0	3
MGA	MGA_c.7307G>A	p.R2436H	15	42052636	G	A	FALSE	FALSE	template_unavailable	0	0	0	0	0	0	0	0	0	0	0	0	0	0	0	0	0	0	1	0	0	0	0	0	0	0	0	1
MLL2	MLL2_c.13898C>T	p.S4633L	12	49424164	G	A	FALSE	FALSE	template_unavailable	0	0	0	0	0	0	0	0	0	0	0	0	0	0	0	0	0	0	1	0	0	0	0	0	0	0	0	1
MLL2	MLL2_c.15685C>A	p.R5229S	12	49420064	G	T	FALSE	FALSE	template_unavailable	0	0	0	0	0	0	0	0	0	0	0	0	0	0	0	1	0	0	0	0	0	0	0	0	0	0	0	1
MLL2	MLL2_c.16295G>A	p.R5432Q	12	49416416	C	T	FALSE	FALSE	template_unavailable	0	0	0	0	0	0	0	0	0	0	0	0	0	0	0	0	0	0	1	0	0	0	0	0	0	0	0	1
MLL2	MLL2_c.16400G>A	p.G5467D	12	49416075	C	T	FALSE	FALSE	template_unavailable	0	0	0	0	0	0	0	1	0	0	0	0	0	0	0	0	0	0	0	0	0	0	0	0	0	0	0	1
MLL2	MLL2_c.2576C>T	p.P859L	12	49444890	G	A	FALSE	FALSE	template_unavailable	0	0	0	0	0	0	0	0	0	0	0	0	0	0	0	0	0	0	1	0	0	0	0	0	0	0	0	1
MLL2	MLL2_c.2585C>T	p.P862L	12	49444881	G	A	FALSE	FALSE	template_unavailable	0	0	0	0	0	0	0	0	0	0	0	0	0	0	1	0	0	0	0	0	0	0	0	0	0	0	0	1
MLL2	MLL2_c.4154G>T	p.S1385I	12	49441830	C	A	FALSE	FALSE	template_unavailable	0	0	0	0	0	0	0	0	0	0	0	0	0	0	0	1	0	0	0	0	0	0	0	0	0	0	0	1
MLL2	MLL2_c.5044G>A	p.E1682K	12	49438225	C	T	FALSE	FALSE	template_unavailable	0	0	0	0	0	0	0	0	0	1	0	0	0	0	0	0	0	0	0	0	0	0	0	0	0	0	1	2
MLL3	MLL3_c.13273G>T	p.D4425Y	7	151845739	C	A	FALSE	FALSE	template_unavailable	0	0	1	0	0	0	0	0	0	0	0	0	1	0	0	0	0	0	0	0	0	0	0	0	0	0	0	2
MLL3	MLL3_c.14545C>T	p.H4849Y	7	151835979	G	A	FALSE	FALSE	template_unavailable	0	0	0	0	0	0	0	0	0	0	0	0	0	0	0	0	0	0	1	0	0	0	0	0	0	0	0	1
MLL3	MLL3_c.4114C>A	p.L1372I	7	151896523	G	T	FALSE	FALSE	template_unavailable	0	0	0	0	0	0	0	0	0	0	0	0	0	0	0	0	0	0	0	0	0	0	0	1	0	0	0	1
MLL3	MLL3_c.4430A>G	p.N1477S	7	151891602	T	C	FALSE	FALSE	template_unavailable	0	0	0	0	0	0	0	0	0	0	0	0	0	0	0	1	0	0	0	0	0	0	0	0	0	0	0	1
MLL3	MLL3_c.5209A>G	p.K1737E	7	151880115	T	C	FALSE	FALSE	template_unavailable	0	0	0	0	0	0	0	0	0	0	0	0	0	0	0	0	0	0	1	0	0	0	0	0	0	0	0	1
MLL3	MLL3_c.5717G>A	p.R1906Q	7	151879228	C	T	FALSE	FALSE	template_unavailable	0	0	0	0	0	0	0	0	0	0	0	0	0	0	0	0	0	0	0	0	0	0	0	0	0	0	1	1
MLL3	MLL3_c.6488C>A	p.P2163H	7	151878457	G	T	FALSE	FALSE	template_unavailable	0	0	0	0	0	0	0	0	0	0	0	1	0	0	0	0	0	0	0	0	0	0	0	0	0	0	0	1
MLL3	MLL3_c.7361G>C	p.R2454T	7	151877000	C	G	FALSE	FALSE	template_unavailable	0	1	0	0	0	0	0	0	0	0	0	0	0	0	0	0	0	0	0	0	0	0	0	0	0	0	0	1
MTM1	MTM1_c.676C>T	p.P226S	23	149809889	C	T	TRUE	TRUE	BRDN0000553595	0	0	0	0	0	0	0	0	0	0	0	0	0	0	0	0	0	0	0	0	1	0	0	0	0	0	0	1
MTM1	MTM1_c.894T>A	p.D298E	23	149818215	T	A	TRUE	TRUE	BRDN0000553851	0	0	0	0	0	0	0	0	0	0	0	0	0	0	0	0	1	0	0	0	0	0	0	0	0	0	0	1
MTM1	MTM1_c.758G>A	p.R253Q	23	149814235	G	A	TRUE	TRUE	BRDN0000553991	0	0	0	0	0	0	0	0	0	0	0	0	0	0	0	0	0	0	1	0	0	0	0	0	0	0	2	3
MTOR	MTOR_c.4375G>C	p.A1459P	1	11217303	C	G	FALSE	FALSE	template_unavailable	0	0	0	0	0	0	0	0	0	0	0	1	0	0	0	0	0	0	0	0	0	0	0	0	0	0	0	1
MTOR	MTOR_c.5395G>A	p.E1799K	1	11190804	C	T	FALSE	FALSE	template_unavailable	0	0	0	0	1	0	0	0	0	1	0	0	0	0	0	0	0	1	0	0	0	0	0	0	0	0	2	5
MTOR	MTOR_c.5662T>A	p.F1888I	1	11189847	A	T	FALSE	FALSE	template_unavailable	0	0	0	0	0	0	0	0	0	0	0	1	0	0	0	0	0	0	0	0	0	0	0	0	0	0	0	1
MTOR	MTOR_c.5662T>G	p.F1888V	1	11189847	A	C	FALSE	FALSE	template_unavailable	0	0	0	0	0	0	0	0	0	0	0	0	0	0	0	0	0	0	0	0	0	0	0	0	0	0	1	1
MTOR	MTOR_c.5921A>G	p.Y1974C	1	11188173	T	C	FALSE	FALSE	template_unavailable	0	0	0	0	0	0	0	0	0	0	0	0	0	0	0	0	0	0	0	0	0	0	0	0	0	0	1	1
MTOR	MTOR_c.6514T>A	p.L2172M	1	11186691	A	T	FALSE	FALSE	template_unavailable	0	0	0	0	0	0	0	0	0	0	1	0	0	0	0	0	0	0	0	0	0	0	0	0	0	0	0	1
MTOR	MTOR_c.6644C>A	p.S2215Y	1	11184573	G	T	FALSE	FALSE	template_unavailable	0	0	0	0	1	0	0	0	0	0	0	1	0	0	0	0	0	0	0	0	0	0	0	0	0	0	3	5
MTOR	MTOR_c.6644C>T	p.S2215F	1	11184573	G	A	FALSE	FALSE	template_unavailable	0	0	0	0	0	0	0	0	0	0	0	0	0	0	0	0	0	0	1	0	0	0	0	0	0	0	0	1
MTUS2	MTUS2_c.1102G>A	p.D368N	13	29599907	G	A	FALSE	FALSE	template_unavailable	0	0	0	0	0	0	0	0	0	0	0	0	0	0	0	0	0	0	0	0	0	0	0	0	0	0	1	1
MTUS2	MTUS2_c.1891G>A	p.E631K	13	29600696	G	A	FALSE	FALSE	template_unavailable	0	0	0	0	0	0	0	0	0	0	0	0	0	0	0	0	0	0	1	0	0	0	0	0	0	0	0	1
MTUS2	MTUS2_c.2012C>T	p.S671L	13	29600817	C	T	FALSE	FALSE	template_unavailable	0	0	0	0	0	0	0	0	0	0	0	0	0	0	0	0	0	0	2	0	0	0	0	0	0	0	0	2
MTUS2	MTUS2_c.2467G>T	p.D823Y	13	29608253	G	T	FALSE	FALSE	template_unavailable	0	0	0	0	0	0	0	0	0	0	0	1	0	0	0	0	0	0	0	0	0	0	0	0	0	0	0	1
MTUS2	MTUS2_c.3095C>T	p.A1032V	13	29933558	C	T	FALSE	FALSE	template_unavailable	0	0	0	0	0	0	0	0	0	0	0	0	0	0	0	0	0	0	0	0	0	0	0	0	0	0	2	2
MTUS2	MTUS2_c.3670G>C	p.E1224Q	13	30071435	G	C	FALSE	FALSE	template_unavailable	0	0	0	0	0	0	0	0	0	0	0	1	0	0	0	0	0	0	0	0	0	0	0	0	0	0	0	1
MTUS2	MTUS2_c.511G>A	p.D171N	13	29599316	G	A	FALSE	FALSE	template_unavailable	0	0	0	0	0	0	0	0	0	0	0	0	0	0	0	0	0	0	1	0	0	0	0	0	0	0	0	1
MTUS2	MTUS2_c.86G>T	p.R29I	13	29598891	G	T	FALSE	FALSE	template_unavailable	0	0	0	0	1	0	0	0	0	0	0	0	0	0	0	0	0	0	0	0	0	0	0	0	0	0	0	1
MUC16	MUC16_c.15346G>A	p.E5116K	19	9072100	C	T	FALSE	FALSE	template_unavailable	0	0	0	0	0	0	0	0	0	0	0	0	0	0	0	0	0	0	3	0	0	0	0	0	0	0	0	3
MUC16	MUC16_c.15351T>G	p.I5117M	19	9072095	A	C	FALSE	FALSE	template_unavailable	0	0	0	0	0	0	0	0	0	0	0	0	0	1	0	0	0	0	0	0	0	0	0	0	0	0	0	1
MUC16	MUC16_c.16375C>A	p.L5459M	19	9071071	G	T	FALSE	FALSE	template_unavailable	0	0	0	0	0	0	0	0	0	0	0	0	0	0	1	0	0	0	0	0	0	0	0	0	0	0	0	1
MUC16	MUC16_c.17756C>T	p.P5919L	19	9069690	G	A	FALSE	FALSE	template_unavailable	0	0	0	0	0	0	0	0	0	0	0	0	0	0	0	0	0	0	1	0	0	0	0	0	0	0	0	1
MUC16	MUC16_c.21725C>T	p.S7242F	19	9065721	G	A	FALSE	FALSE	template_unavailable	0	0	0	0	0	0	0	0	0	0	0	0	0	0	0	0	0	0	6	0	0	0	0	0	0	0	0	6
MUC16	MUC16_c.21911C>A	p.S7304Y	19	9065535	G	T	FALSE	FALSE	template_unavailable	0	0	0	0	0	0	0	0	0	0	0	0	0	0	1	0	0	0	0	0	0	0	0	0	0	0	0	1
MUC16	MUC16_c.23896G>A	p.E7966K	19	9063550	C	T	FALSE	FALSE	template_unavailable	0	0	0	0	0	0	0	0	0	0	0	0	0	0	0	1	0	0	2	0	0	0	0	0	0	0	0	3
MUC16	MUC16_c.6758C>T	p.S2253F	19	9085057	G	A	FALSE	FALSE	template_unavailable	0	0	0	0	0	0	0	0	0	0	0	0	0	0	0	0	0	0	3	0	0	0	0	0	0	0	0	3
MYD88	MYD88_c.719T>C	p.M240T	3	38182259	T	C	TRUE	FALSE	failed_QC	0	0	0	2	0	0	0	1	0	0	0	0	0	0	0	0	0	0	0	0	0	0	0	0	0	0	0	3
MYD88	MYD88_c.818T>C	p.L273P	3	38182641	T	C	TRUE	FALSE	failed_QC	0	0	0	9	0	0	0	4	0	0	0	0	0	0	0	0	0	1	0	0	0	0	0	0	0	0	0	14
MYH8	MYH8_c.1323G>T	p.W441C	17	10315780	C	A	FALSE	FALSE	template_unavailable	0	0	0	0	0	0	0	0	0	0	0	0	0	0	0	1	0	0	0	0	0	0	0	0	0	0	0	1
MYH8	MYH8_c.3046G>A	p.E1016K	17	10304654	C	T	FALSE	FALSE	template_unavailable	0	0	0	0	0	0	0	0	0	0	0	0	0	0	0	0	0	0	1	0	0	0	0	0	0	0	0	1
MYH8	MYH8_c.3126A>C	p.E1042D	17	10304491	T	G	FALSE	FALSE	template_unavailable	0	0	0	0	1	0	0	0	0	0	0	0	0	0	0	0	0	0	0	0	0	0	0	0	0	0	0	1
MYH8	MYH8_c.3211G>A	p.D1071N	17	10304406	C	T	FALSE	FALSE	template_unavailable	0	0	0	0	0	0	0	0	0	0	0	0	0	0	0	0	0	0	1	0	0	0	0	0	0	0	0	1
MYH8	MYH8_c.3370G>A	p.E1124K	17	10304072	C	T	FALSE	FALSE	template_unavailable	0	0	0	0	0	0	0	0	0	0	0	0	0	0	0	0	0	0	1	0	0	0	0	0	0	0	0	1
MYH8	MYH8_c.3854C>G	p.T1285R	17	10302868	G	C	FALSE	FALSE	template_unavailable	0	0	0	0	0	0	0	0	0	0	1	0	0	0	0	0	0	0	0	0	0	0	0	0	0	0	0	1
MYH8	MYH8_c.4000C>G	p.H1334D	17	10301939	G	C	FALSE	FALSE	template_unavailable	0	0	0	0	0	0	0	0	0	0	0	0	0	0	1	0	0	0	0	0	0	0	0	0	0	0	0	1
MYH8	MYH8_c.4252G>C	p.E1418Q	17	10300230	C	G	FALSE	FALSE	template_unavailable	0	0	0	0	0	0	0	0	0	0	0	0	0	0	1	0	0	0	0	0	0	0	0	0	0	0	0	1
NBPF15	NBPF15_c.1835A>G	p.Y612C	1	148594462	A	G	TRUE	TRUE	BRDN0000553222	0	0	0	0	0	0	0	0	0	0	0	0	0	0	0	0	0	0	0	0	0	0	0	0	1	0	0	1
NCOR1	NCOR1_c.1684G>A	p.E562K	17	16024534	C	T	FALSE	FALSE	template_unavailable	0	0	0	0	0	0	0	0	0	0	0	0	0	0	0	1	0	0	0	0	0	0	0	0	0	0	0	1
NCOR1	NCOR1_c.2063G>A	p.R688Q	17	16012219	C	T	FALSE	FALSE	template_unavailable	0	0	0	0	1	0	0	0	0	0	0	0	0	0	0	0	0	0	0	0	0	0	0	0	0	0	0	1
NCOR1	NCOR1_c.4556C>T	p.S1519L	17	15971393	G	A	FALSE	FALSE	template_unavailable	0	0	0	0	0	0	0	0	0	0	0	0	0	0	0	0	0	0	0	0	0	0	0	0	0	0	1	1
NCOR1	NCOR1_c.509A>G	p.N170S	17	16068402	T	C	FALSE	FALSE	template_unavailable	0	0	0	0	0	0	0	0	0	0	1	0	0	0	0	0	0	0	0	0	0	0	0	0	0	0	0	1
NCOR1	NCOR1_c.5152C>T	p.R1718W	17	15967451	G	A	FALSE	FALSE	template_unavailable	0	0	0	0	0	0	0	0	0	1	0	0	0	0	0	0	0	0	0	0	0	0	0	0	0	0	0	1
NCOR1	NCOR1_c.5263C>T	p.R1755C	17	15965543	G	A	FALSE	FALSE	template_unavailable	0	0	1	0	0	0	0	0	0	0	0	0	0	0	0	0	0	0	2	0	0	0	0	0	0	0	0	3
NCOR1	NCOR1_c.6211C>A	p.Q2071K	17	15961009	G	T	FALSE	FALSE	template_unavailable	0	0	0	0	0	0	0	0	0	0	0	1	0	0	0	0	0	0	0	0	0	0	0	0	0	0	0	1
NCOR1	NCOR1_c.6640C>T	p.R2214C	17	15950304	G	A	FALSE	FALSE	template_unavailable	0	0	0	0	0	0	0	0	0	0	0	0	0	0	0	0	0	0	1	0	0	0	0	0	0	0	1	2
NEFH	NEFH_c.1255C>T	p.P419S	22	29884884	C	T	FALSE	FALSE	template_unavailable	0	0	0	0	0	0	0	0	0	0	0	0	0	0	0	0	0	0	0	0	0	0	0	0	0	0	1	1
NEFH	NEFH_c.2692G>A	p.E898K	22	29886321	G	A	FALSE	FALSE	template_unavailable	0	0	0	0	0	0	0	0	0	0	0	0	0	0	0	0	0	0	0	0	0	0	0	0	0	0	0	1
NF1	NF1_c.1382G>A	p.R461Q	17	29533379	G	A	FALSE	FALSE	template_unavailable	0	0	0	0	0	0	0	0	0	0	0	0	0	0	0	0	0	0	0	0	0	0	0	0	0	0	1	1
NF1	NF1_c.151T>G	p.F51V	17	29483091	T	G	FALSE	FALSE	template_unavailable	0	0	0	0	0	0	0	0	0	0	0	0	0	0	0	0	0	1	0	0	0	0	0	0	0	0	0	1
NF1	NF1_c.2525G>A	p.G842D	17	29556158	G	A	FALSE	FALSE	template_unavailable	1	0	0	0	0	0	0	0	0	0	0	0	0	0	0	0	0	0	0	0	0	0	0	0	0	0	0	1
NF1	NF1_c.3624G>T	p.L1208F	17	29560147	G	T	FALSE	FALSE	template_unavailable	0	0	0	0	0	0	0	0	0	0	0	0	0	0	1	0	0	0	0	0	0	0	0	0	0	0	0	1
NF1	NF1_c.4339C>A	p.Q1447K	17	29586056	C	A	FALSE	FALSE	template_unavailable	0	0	0	0	0	0	0	0	0	1	0	0	0	0	0	0	0	0	0	0	0	0	0	0	0	0	0	1
NF1	NF1_c.5365G>A	p.E1789K	17	29654613	G	A	FALSE	FALSE	template_unavailable	0	0	0	0	0	0	0	0	0	0	0	0	0	0	0	0	0	0	0	0	0	0	0	0	0	0	1	1
NF1	NF1_c.5609G>A	p.R1870Q	17	29654857	G	A	FALSE	FALSE	template_unavailable	0	0	0	0	0	0	0	0	0	0	0	0	0	1	0	0	0	0	0	0	0	0	0	0	0	0	1	2
NF1	NF1_c.581T>C	p.L194P	17	29497010	T	C	FALSE	FALSE	template_unavailable	0	0	0	0	0	0	0	0	0	0	0	0	0	0	0	0	0	0	0	0	1	0	0	0	0	0	0	1
NF2	NF2_c.1013G>A	p.R338H	22	30067828	G	A	TRUE	FALSE	failed_QC	0	0	0	0	0	0	0	0	0	0	0	0	0	0	1	0	0	0	0	0	0	0	0	0	0	0	0	1
NF2	NF2_c.428C>T	p.S143F	22	30038255	C	T	TRUE	FALSE	failed_QC	0	0	0	0	0	0	0	0	0	0	1	0	0	0	0	0	0	0	0	0	0	0	0	0	0	0	0	1
NFE2L2	NFE2L2_c.239C>A	p.T80K	2	178098806	G	T	TRUE	TRUE	BRDN0000553192	0	0	0	0	0	0	0	0	0	0	0	0	0	0	1	1	0	0	0	0	0	0	0	0	0	0	0	2
NFE2L2	NFE2L2_c.92G>T	p.G31V	2	178098953	C	A	TRUE	TRUE	BRDN0000553204	0	0	0	0	0	0	0	0	1	0	0	0	0	0	0	0	0	0	0	0	0	0	0	0	0	0	0	1
NFE2L2	NFE2L2_c.91G>A	p.G31R	2	178098954	C	T	TRUE	TRUE	BRDN0000553207	0	1	0	0	0	0	0	0	0	0	0	0	0	0	0	0	0	0	0	0	0	0	0	0	0	0	0	1
NFE2L2	NFE2L2_c.92G>C	p.G31A	2	178098953	C	G	TRUE	TRUE	BRDN0000553218	0	1	0	0	0	0	0	0	0	0	0	0	0	0	0	2	0	0	0	0	0	0	0	0	0	0	0	3
NFE2L2	NFE2L2_c.479A>G	p.N160S	2	178097235	T	C	TRUE	TRUE	BRDN0000553681	0	0	0	0	0	0	0	0	0	0	0	0	0	0	0	0	0	0	0	0	0	0	0	0	0	0	1	1
NFE2L2	NFE2L2_c.239C>G	p.T80R	2	178098806	G	C	TRUE	FALSE	failed_QC	0	0	0	0	0	0	0	0	0	0	0	0	0	0	0	0	0	0	0	0	0	0	0	0	0	0	1	1
NFKBIA	NFKBIA_c.409C>T	p.P137S	14	35872494	G	A	TRUE	TRUE	BRDN0000552521	0	0	0	0	0	0	0	0	0	0	0	0	0	0	0	0	0	0	1	0	0	0	0	0	0	0	0	1
NMNAT3	NMNAT3_c.142C>T	p.P48S	3	139297865	G	A	TRUE	FALSE	failed_QC	0	0	0	0	0	0	0	0	0	0	0	0	0	0	0	0	0	0	1	0	0	0	0	0	0	0	0	1
NOTCH1	NOTCH1_c.1058G>A	p.R353H	9	139413084	C	T	TRUE	FALSE	failed_QC	0	0	0	0	0	0	0	0	0	0	1	0	0	0	0	0	0	0	0	0	0	0	0	0	0	0	0	1
NOTCH1	NOTCH1_c.1160G>A	p.C387Y	9	139412684	C	T	TRUE	FALSE	failed_QC	0	0	0	0	0	0	0	0	0	0	1	0	0	0	0	0	0	0	0	0	0	0	0	0	0	0	0	1
NOTCH1	NOTCH1_c.1318T>C	p.C440R	9	139412327	A	G	TRUE	FALSE	failed_QC	0	0	0	0	0	0	0	0	0	0	1	0	0	0	0	0	0	0	0	0	0	0	0	0	0	0	0	1
NOTCH1	NOTCH1_c.1441G>A	p.G481S	9	139412204	C	T	TRUE	FALSE	failed_QC	0	0	0	0	0	0	0	0	0	0	1	0	0	0	0	0	0	0	0	0	0	0	0	0	0	0	0	1
NOTCH1	NOTCH1_c.1864G>A	p.D622N	9	139409974	C	T	TRUE	FALSE	failed_QC	0	0	0	0	0	0	0	0	0	0	0	0	0	0	0	0	0	0	0	0	0	0	0	0	0	0	1	1
NOTCH1	NOTCH1_c.6058G>C	p.D2020H	9	139393588	C	G	TRUE	FALSE	failed_QC	0	0	0	0	0	0	0	0	0	0	0	0	0	0	0	1	0	0	0	0	0	0	0	0	0	0	0	1
NOTCH1	NOTCH1_c.6328G>A	p.V2110M	9	139391863	C	T	TRUE	FALSE	failed_QC	0	0	0	0	0	0	0	0	0	0	0	0	0	1	0	0	0	0	0	0	0	0	0	0	0	0	0	1
NOTCH1	NOTCH1_c.7460A>T	p.Q2487L	9	139390731	T	A	TRUE	FALSE	failed_QC	0	0	1	0	0	0	0	0	0	0	0	0	0	0	0	0	0	0	0	0	0	0	0	0	0	0	0	1
NRAS	NRAS_c.181C>A	p.Q61K	1	115256530	G	T	TRUE	TRUE	BRDN0000553335	1	0	0	0	6	0	0	0	0	0	0	0	0	1	1	0	0	10	26	0	0	0	0	0	0	3	1	49
NRAS	NRAS_c.35G>C	p.G12A	1	115258747	C	G	TRUE	TRUE	BRDN0000553358	0	0	0	0	1	0	0	0	0	0	0	0	0	0	0	0	0	0	1	0	0	0	0	0	0	0	0	2
NRAS	NRAS_c.190T>G	p.Y64D	1	115256521	A	C	TRUE	TRUE	BRDN0000553369	0	0	0	0	0	0	0	0	0	0	0	0	0	0	0	0	0	1	0	0	0	0	0	0	0	0	0	1
NRAS	NRAS_c.182A>G	p.Q61R	1	115256529	T	C	TRUE	TRUE	BRDN0000553412	1	1	0	2	1	0	0	0	0	0	0	0	0	0	0	0	0	12	34	0	2	0	0	0	0	11	3	67
NRAS	NRAS_c.34G>T	p.G12C	1	115258748	C	A	TRUE	TRUE	BRDN0000553436	1	0	0	0	3	0	0	0	0	0	0	0	0	0	0	0	0	0	0	0	0	0	0	0	1	0	0	5
NRAS	NRAS_c.183A>C	p.Q61H	1	115256528	T	G	TRUE	TRUE	BRDN0000553479	1	0	0	0	1	0	0	0	0	0	0	0	0	0	0	0	0	4	1	0	0	0	0	0	0	0	0	7
NRAS	NRAS_c.182A>T	p.Q61L	1	115256529	T	A	TRUE	TRUE	BRDN0000553488	0	0	0	0	2	0	0	0	0	1	0	0	0	0	1	0	0	2	11	0	0	0	0	0	0	0	0	17
NRAS	NRAS_c.35G>T	p.G12V	1	115258747	C	A	TRUE	FALSE	failed_QC	0	0	0	0	1	0	0	0	0	0	0	0	0	0	0	0	0	1	0	0	0	0	0	0	0	0	0	2
NSD1	NSD1_c.5027C>A	p.A1676D	5	176687050	C	A	FALSE	FALSE	template_unavailable	0	0	0	0	0	0	0	0	0	0	0	0	0	0	0	0	0	0	0	0	1	0	0	0	0	0	0	1
NSD1	NSD1_c.5448G>A	p.M1816I	5	176696747	G	A	FALSE	FALSE	template_unavailable	0	0	0	0	0	0	0	0	0	0	0	0	0	0	0	0	0	0	1	0	0	0	0	0	0	0	0	1
NSD1	NSD1_c.5951G>A	p.R1984Q	5	176709524	G	A	FALSE	FALSE	template_unavailable	0	0	0	0	0	0	0	0	0	0	1	0	0	0	0	0	0	0	0	0	0	0	0	0	0	0	0	1
NSD1	NSD1_c.5951G>T	p.R1984L	5	176709524	G	T	FALSE	FALSE	template_unavailable	0	1	0	0	0	0	0	0	0	0	0	0	0	0	0	0	0	0	0	0	0	0	0	0	0	0	0	1
NSD1	NSD1_c.6022G>A	p.D2008N	5	176710800	G	A	FALSE	FALSE	template_unavailable	0	0	0	0	0	0	0	0	0	0	0	0	0	0	0	1	0	0	0	0	0	0	0	0	0	0	0	1
NSD1	NSD1_c.6380C>T	p.A2127V	5	176719076	C	T	FALSE	FALSE	template_unavailable	0	0	0	0	0	0	0	0	0	0	0	0	0	0	0	0	0	0	0	0	0	0	0	0	0	0	1	1
NSD1	NSD1_c.6581C>T	p.S2194F	5	176720950	C	T	FALSE	FALSE	template_unavailable	0	0	0	0	0	0	0	0	0	0	0	0	0	0	0	0	0	0	2	0	0	0	0	0	0	0	0	2
NSD1	NSD1_c.7180A>G	p.I2394V	5	176721549	A	G	FALSE	FALSE	template_unavailable	0	0	0	0	0	0	0	0	0	0	0	0	0	0	0	0	0	0	0	0	0	0	0	0	1	0	0	1
ODAM	ODAM_c.91G>A	p.E31K	4	71062448	G	A	FALSE	FALSE	template_unavailable	0	0	0	0	0	0	0	0	0	0	0	0	0	0	1	0	0	0	0	0	0	0	0	0	0	0	0	1
OMA1	OMA1_c.529C>T	p.P177S	1	59002385	G	A	TRUE	TRUE	BRDN0000553066	0	0	0	0	0	0	0	0	0	0	0	0	0	0	0	0	0	0	1	0	0	0	0	0	0	0	0	1
OR2G6	OR2G6_c.447G>T	p.W149C	1	248685394	G	T	TRUE	TRUE	BRDN0000552497	0	0	0	0	0	0	0	0	0	0	0	0	0	0	1	0	0	0	0	0	0	0	0	0	0	0	0	1
OR2G6	OR2G6_c.125A>G	p.N42S	1	248685072	A	G	TRUE	TRUE	BRDN0000552543	0	0	0	0	0	0	0	0	0	0	0	0	0	0	0	0	0	0	0	0	0	0	0	0	1	0	0	1
OR2G6	OR2G6_c.529A>T	p.I177F	1	248685476	A	T	TRUE	TRUE	BRDN0000552555	0	0	0	0	0	0	0	0	0	0	0	0	0	0	0	1	0	0	0	0	0	0	0	0	0	0	0	1
OR2G6	OR2G6_c.707A>T	p.K236M	1	248685654	A	T	TRUE	TRUE	BRDN0000552567	0	0	0	0	0	0	0	0	0	0	0	0	0	0	1	0	0	0	0	0	0	0	0	0	0	0	0	1
OR2G6	OR2G6_c.880A>T	p.N294Y	1	248685827	A	T	TRUE	TRUE	BRDN0000560824	0	0	0	0	0	0	0	0	0	0	0	0	0	0	0	0	0	0	1	0	0	0	0	0	0	0	0	1
OR2G6	OR2G6_c.794G>A	p.R265K	1	248685741	G	A	TRUE	TRUE	BRDN0000560831	0	0	0	0	0	0	0	0	0	0	0	0	0	0	0	1	0	0	0	0	0	0	0	0	0	0	0	1
OR2M2	OR2M2_c.544C>T	p.P182S	1	248343831	C	T	TRUE	TRUE	BRDN0000553383	0	0	0	0	0	0	0	0	0	0	0	0	0	0	0	0	0	0	1	0	0	0	0	0	0	0	0	1
OR2M2	OR2M2_c.695A>T	p.E232V	1	248343982	A	T	TRUE	TRUE	BRDN0000553460	0	0	0	0	0	0	0	0	1	0	0	0	0	0	0	0	0	0	0	0	0	0	0	0	0	0	0	1
OR2M2	OR2M2_c.124A>T	p.N42Y	1	248343411	A	T	TRUE	TRUE	BRDN0000553504	0	0	0	0	0	0	0	0	0	0	0	0	0	0	1	0	0	0	0	0	0	0	0	0	0	0	0	1
OR2M2	OR2M2_c.349G>A	p.V117I	1	248343636	G	A	TRUE	TRUE	BRDN0000553526	0	0	0	0	0	0	0	0	0	0	0	0	0	0	1	0	0	0	0	0	0	0	0	0	0	0	0	1
OR2M2	OR2M2_c.446G>T	p.W149L	1	248343733	G	T	TRUE	FALSE	failed_QC	0	0	0	0	0	0	0	0	0	0	0	0	0	0	1	0	0	0	0	0	0	0	0	0	0	0	0	1
OR2M2	OR2M2_c.738G>A	p.M246I	1	248344025	G	A	TRUE	FALSE	failed_QC	0	0	0	0	0	0	0	0	0	0	0	0	0	0	0	0	0	0	1	0	0	0	0	0	0	0	0	1
OR2M5	OR2M5_c.236C>A	p.P79H	1	248308685	C	A	FALSE	FALSE	template_unavailable	0	0	0	0	0	0	0	0	0	0	0	0	0	0	1	0	0	0	0	0	0	0	0	0	0	0	0	1
OR2M5	OR2M5_c.3G>T	p.M1I	1	248308452	G	T	FALSE	FALSE	template_unavailable	0	0	0	0	0	0	0	0	0	0	0	0	0	0	1	0	0	0	0	0	0	0	0	0	0	0	0	1
OR2M5	OR2M5_c.451C>A	p.L151M	1	248308900	C	A	FALSE	FALSE	template_unavailable	0	0	0	0	0	0	0	0	0	0	0	0	0	0	0	0	0	0	0	0	0	0	0	0	0	0	1	1
OR2M5	OR2M5_c.517G>A	p.E173K	1	248308966	G	A	FALSE	FALSE	template_unavailable	0	0	0	0	0	0	0	0	0	0	0	0	0	0	0	0	0	0	1	0	0	0	0	0	0	0	0	1
OR2M5	OR2M5_c.679C>T	p.H227Y	1	248309128	C	T	FALSE	FALSE	template_unavailable	0	0	0	0	0	0	0	0	0	0	0	0	0	0	0	0	0	0	1	0	0	0	0	0	0	0	0	1
OR2M5	OR2M5_c.922G>T	p.G308C	1	248309371	G	T	FALSE	FALSE	template_unavailable	0	1	0	0	0	0	0	0	0	0	0	0	0	0	0	0	0	0	0	0	0	0	0	0	0	0	0	1
OR2T12	OR2T12_c.137T>A	p.L46Q	1	248458744	A	T	FALSE	FALSE	template_unavailable	0	0	0	0	0	0	0	0	0	0	0	0	0	0	0	1	0	0	0	0	0	0	0	0	0	0	0	1
OR2T12	OR2T12_c.437C>T	p.S146F	1	248458444	G	A	FALSE	FALSE	template_unavailable	0	0	0	0	0	0	0	0	0	0	0	0	0	0	0	0	0	0	1	0	0	0	0	0	0	0	0	1
OR2T12	OR2T12_c.532G>A	p.E178K	1	248458349	C	T	FALSE	FALSE	template_unavailable	0	0	0	0	0	0	0	0	0	0	1	0	0	0	0	0	0	0	0	0	0	0	0	0	0	0	0	1
OR2T12	OR2T12_c.629C>T	p.S210F	1	248458252	G	A	FALSE	FALSE	template_unavailable	0	0	0	0	0	0	0	0	0	0	0	0	0	0	0	0	0	0	3	0	0	0	0	0	0	0	0	3
OR2T12	OR2T12_c.653T>C	p.L218P	1	248458228	A	G	FALSE	FALSE	template_unavailable	0	0	0	0	1	0	0	0	0	0	0	0	0	0	0	0	0	0	0	0	0	0	0	0	0	0	0	1
OR2T12	OR2T12_c.703G>T	p.A235S	1	248458178	C	A	FALSE	FALSE	template_unavailable	0	0	0	0	0	0	0	0	0	0	0	0	0	0	1	0	0	0	0	0	0	0	0	0	0	0	0	1
OR2T33	OR2T33_c.146G>T	p.W49L	1	248436971	C	A	TRUE	TRUE	BRDN0000552443	0	0	0	0	0	0	0	0	0	0	1	0	0	0	0	0	0	0	0	0	0	0	0	0	0	0	0	1
OR2T33	OR2T33_c.854C>T	p.P285L	1	248436263	G	A	TRUE	TRUE	BRDN0000552451	0	0	0	0	0	0	0	0	0	0	0	0	0	0	0	0	0	0	0	0	0	0	0	0	0	0	1	1
OR2T33	OR2T33_c.179T>C	p.L60P	1	248436938	A	G	TRUE	TRUE	BRDN0000552455	0	0	0	0	0	0	0	0	0	0	0	0	0	0	0	1	0	0	0	0	0	0	0	0	0	0	0	1
OR2T33	OR2T33_c.441G>T	p.W147C	1	248436676	C	A	TRUE	TRUE	BRDN0000552463	0	0	0	0	0	0	0	0	0	0	0	0	0	0	1	0	0	0	0	0	0	0	0	0	0	0	0	1
OR2T33	OR2T33_c.358C>A	p.R120S	1	248436759	G	T	TRUE	TRUE	BRDN0000552475	0	0	0	0	0	0	0	0	0	0	1	0	0	0	0	0	0	0	0	0	0	0	0	0	0	0	0	1
OR2T33	OR2T33_c.490T>G	p.F164V	1	248436627	A	C	TRUE	TRUE	BRDN0000552625	0	0	0	0	0	0	0	0	1	0	0	0	0	0	0	0	0	0	0	0	0	0	0	0	0	0	0	1
OR4A15	OR4A15_c.1010C>G	p.A337G	11	55136369	C	G	FALSE	FALSE	template_unavailable	0	0	0	0	1	0	0	0	0	0	0	0	0	0	0	0	0	0	0	0	0	0	0	0	0	0	0	1
OR4A15	OR4A15_c.197C>T	p.T66M	11	55135556	C	T	FALSE	FALSE	template_unavailable	0	0	1	0	0	0	0	0	0	1	0	0	0	0	1	0	0	0	0	0	0	0	0	0	0	0	0	3
OR4A15	OR4A15_c.256C>T	p.P86S	11	55135615	C	T	FALSE	FALSE	template_unavailable	0	0	0	0	0	0	0	0	0	0	0	0	0	0	0	1	0	0	0	0	0	0	0	0	0	0	0	1
OR4A15	OR4A15_c.433G>A	p.V145I	11	55135792	G	A	FALSE	FALSE	template_unavailable	0	0	0	0	0	0	0	0	0	0	0	0	0	0	1	0	0	0	0	0	0	0	0	0	0	0	0	1
OR4A15	OR4A15_c.500G>A	p.R167Q	11	55135859	G	A	FALSE	FALSE	template_unavailable	0	0	0	0	0	0	0	0	0	0	1	0	0	0	0	0	0	0	0	0	0	0	0	0	0	0	1	2
OR4A15	OR4A15_c.704G>T	p.C235F	11	55136063	G	T	FALSE	FALSE	template_unavailable	0	0	0	0	0	0	0	0	0	0	0	0	0	0	0	0	0	0	0	0	0	0	0	0	0	0	1	1
OR4A15	OR4A15_c.803G>T	p.C268F	11	55136162	G	T	FALSE	FALSE	template_unavailable	0	0	0	0	0	0	0	0	0	0	0	0	0	0	1	0	0	0	0	0	0	0	0	0	0	0	0	1
OR4A5	OR4A5_c.115G>A	p.G39R	11	51412281	C	T	FALSE	FALSE	template_unavailable	0	0	0	0	0	0	0	0	0	0	0	0	0	0	0	0	0	0	1	0	0	0	0	0	0	0	0	1
OR4A5	OR4A5_c.280G>T	p.G94C	11	51412116	C	A	FALSE	FALSE	template_unavailable	0	0	0	0	0	0	0	0	0	0	0	0	0	0	1	0	0	0	0	0	0	0	0	0	0	0	0	1
OR4A5	OR4A5_c.402G>T	p.M134I	11	51411994	C	A	FALSE	FALSE	template_unavailable	0	0	0	0	0	0	0	0	0	0	0	0	0	0	0	0	0	0	0	0	0	0	0	0	0	0	1	1
OR4A5	OR4A5_c.718G>T	p.G240C	11	51411678	C	A	FALSE	FALSE	template_unavailable	0	0	0	0	0	0	0	0	0	0	0	0	0	0	1	0	0	0	0	0	0	0	0	0	0	0	0	1
OR4A5	OR4A5_c.759C>A	p.F253L	11	51411637	G	T	FALSE	FALSE	template_unavailable	0	0	0	0	0	0	0	0	0	0	0	0	0	0	0	0	0	0	0	0	0	0	0	0	0	0	1	1
OR4A5	OR4A5_c.801C>A	p.F267L	11	51411595	G	T	FALSE	FALSE	template_unavailable	0	0	0	0	0	0	0	0	0	0	0	0	0	0	0	0	0	0	1	0	0	0	0	0	0	0	0	1
OR4C15	OR4C15_c.165G>T	p.M55I	11	55321947	G	T	FALSE	FALSE	template_unavailable	0	0	0	0	0	0	0	0	0	0	0	0	0	0	0	1	0	0	0	0	0	0	0	0	0	0	0	1
OR4C15	OR4C15_c.355C>A	p.L119M	11	55322137	C	A	FALSE	FALSE	template_unavailable	0	0	0	0	0	0	0	0	0	0	0	0	0	0	1	0	0	0	0	0	0	0	0	0	0	0	0	1
OR4C15	OR4C15_c.513G>T	p.M171I	11	55322295	G	T	FALSE	FALSE	template_unavailable	0	0	0	0	0	0	0	0	0	0	0	0	0	0	1	0	0	0	0	0	0	0	0	0	0	0	0	1
OR4C15	OR4C15_c.685C>A	p.H229N	11	55322467	C	A	FALSE	FALSE	template_unavailable	0	0	0	0	0	0	0	0	0	0	1	0	0	0	0	0	0	0	0	0	0	0	0	0	0	0	0	1
OR4C15	OR4C15_c.90G>C	p.K30N	11	55321872	G	C	FALSE	FALSE	template_unavailable	0	0	0	0	0	0	0	0	0	0	0	0	0	0	1	0	0	0	0	0	0	0	0	0	0	0	0	1
OR4C15	OR4C15_c.950C>A	p.A317D	11	55322732	C	A	FALSE	FALSE	template_unavailable	0	0	0	0	1	0	0	0	0	0	0	0	0	0	0	0	0	0	0	0	0	0	0	0	0	0	0	1
OR4M1	OR4M1_c.122G>C	p.G41A	14	20248603	G	C	FALSE	FALSE	template_unavailable	0	0	0	0	0	0	0	0	0	0	0	0	0	0	1	0	0	0	0	0	0	0	0	0	0	0	0	1
OR4M1	OR4M1_c.329C>T	p.S110L	14	20248810	C	T	FALSE	FALSE	template_unavailable	0	0	0	0	1	0	0	0	0	0	0	0	0	1	0	0	0	0	0	0	0	0	0	0	0	0	0	2
OR4M1	OR4M1_c.408G>A	p.M136I	14	20248889	G	A	FALSE	FALSE	template_unavailable	0	0	0	0	0	0	0	0	0	0	0	0	0	0	1	0	0	0	1	0	0	0	0	0	0	0	0	2
OR4M1	OR4M1_c.460A>C	p.I154L	14	20248941	A	C	FALSE	FALSE	template_unavailable	0	0	0	0	0	0	0	0	1	0	0	0	0	0	0	0	0	0	0	0	0	0	0	0	0	0	0	1
OR4M1	OR4M1_c.579C>G	p.F193L	14	20249060	C	G	FALSE	FALSE	template_unavailable	0	1	0	0	0	0	0	0	0	0	0	0	0	0	0	0	0	0	0	0	0	0	0	0	0	0	0	1
OR4M1	OR4M1_c.803C>T	p.S268F	14	20249284	C	T	FALSE	FALSE	template_unavailable	0	0	0	0	0	0	0	0	0	0	0	0	0	0	0	0	0	0	5	0	0	0	0	0	0	0	0	5
OR4M2	OR4M2_c.175A>G	p.M59V	15	22368750	A	G	FALSE	FALSE	template_unavailable	0	0	0	0	0	0	0	0	0	0	1	0	0	0	0	0	0	0	0	0	0	0	0	0	0	0	0	1
OR4M2	OR4M2_c.34T>G	p.F12V	15	22368609	T	G	FALSE	FALSE	template_unavailable	0	0	0	0	0	0	0	0	1	0	0	0	0	0	0	0	0	0	0	0	0	0	0	0	0	0	0	1
OR4M2	OR4M2_c.484C>G	p.L162V	15	22369059	C	G	FALSE	FALSE	template_unavailable	0	0	0	0	0	0	0	0	0	0	1	0	0	0	0	0	0	0	0	0	0	0	0	0	0	0	0	1
OR4M2	OR4M2_c.580C>T	p.P194S	15	22369155	C	T	FALSE	FALSE	template_unavailable	0	0	0	0	0	0	0	0	0	0	0	0	0	0	0	0	0	0	2	0	0	0	0	0	0	0	0	2
OR4M2	OR4M2_c.585G>T	p.E195D	15	22369160	G	T	FALSE	FALSE	template_unavailable	0	0	0	0	0	0	0	0	0	0	0	0	0	0	0	0	0	0	0	0	0	0	0	0	0	0	1	1
OR4M2	OR4M2_c.803C>T	p.S268F	15	22369378	C	T	FALSE	FALSE	template_unavailable	0	0	0	0	0	0	0	0	0	0	0	0	0	0	0	0	0	0	6	0	0	0	0	0	0	0	0	6
OR51A4	OR51A4_c.476T>G	p.L159R	11	4967855	A	C	FALSE	FALSE	template_unavailable	0	0	0	0	0	0	0	0	0	0	0	0	0	0	0	0	0	0	0	0	0	0	0	0	1	0	0	1
OR51A4	OR51A4_c.542G>A	p.C181Y	11	4967789	C	T	FALSE	FALSE	template_unavailable	0	0	0	0	0	0	0	0	0	0	0	0	0	0	0	0	0	0	0	0	1	0	0	0	0	0	0	1
OR51A4	OR51A4_c.622C>A	p.L208I	11	4967709	G	T	FALSE	FALSE	template_unavailable	0	0	0	0	0	0	0	0	0	0	0	0	0	0	0	0	0	0	1	0	0	0	0	0	0	0	0	1
OTUD6A	OTUD6A_c.631G>A	p.V211M	23	69283005	G	A	TRUE	TRUE	BRDN0000552517	0	0	0	0	0	0	0	0	0	0	0	0	0	0	0	0	0	0	0	0	0	0	0	0	0	0	1	1
OTUD6A	OTUD6A_c.512G>C	p.R171P	23	69282886	G	C	TRUE	TRUE	BRDN0000560815	0	1	0	0	0	0	0	0	0	0	0	0	0	0	0	0	0	0	0	0	0	0	0	0	0	0	0	1
PACRGL	PACRGL_c.467T>A	p.L156Q	4	20714511	T	A	FALSE	FALSE	template_unavailable	0	0	0	0	0	0	0	0	1	0	0	0	0	0	0	0	0	0	0	0	0	0	0	0	0	0	0	1
PBRM1	PBRM1_c.1757T>C	p.M586T	3	52651339	A	G	FALSE	FALSE	template_unavailable	0	0	0	0	0	0	0	0	0	0	0	1	0	0	0	0	0	0	0	0	0	0	0	0	0	0	0	1
PBRM1	PBRM1_c.1803T>G	p.N601K	3	52651293	A	C	FALSE	FALSE	template_unavailable	0	0	0	0	0	0	0	0	0	0	0	1	0	0	0	0	0	0	0	0	0	0	0	0	0	0	0	1
PBRM1	PBRM1_c.182A>C	p.K61T	3	52712570	T	G	FALSE	FALSE	template_unavailable	0	0	0	0	0	0	0	0	0	0	0	0	0	0	0	0	0	0	0	0	0	0	0	0	1	0	0	1
PBRM1	PBRM1_c.2335C>G	p.Q779E	3	52643561	G	C	FALSE	FALSE	template_unavailable	0	1	0	0	0	0	0	0	0	0	0	0	0	0	0	0	0	0	0	0	0	0	0	0	0	0	0	1
PBRM1	PBRM1_c.2467G>C	p.D823H	3	52643429	C	G	FALSE	FALSE	template_unavailable	0	0	0	0	0	0	0	0	0	0	0	0	0	0	0	1	0	0	0	0	0	0	0	0	0	0	0	1
PBRM1	PBRM1_c.2578G>A	p.E860K	3	52637738	C	T	FALSE	FALSE	template_unavailable	0	0	0	0	0	0	0	0	0	0	0	1	0	0	0	0	0	0	0	0	0	0	0	0	0	0	0	1
PBRM1	PBRM1_c.3185G>A	p.R1062Q	3	52620643	C	T	FALSE	FALSE	template_unavailable	0	0	0	0	0	0	0	0	0	0	0	0	0	0	0	0	0	0	1	0	0	0	0	0	0	0	0	1
PBRM1	PBRM1_c.3394G>A	p.E1132K	3	52613209	C	T	FALSE	FALSE	template_unavailable	0	1	0	0	0	0	0	0	0	0	0	0	0	0	0	0	0	0	0	0	0	0	0	0	0	0	0	1
PCDHB9	PCDHB9_c.1030C>T	p.P344S	5	140567922	C	T	FALSE	FALSE	template_unavailable	0	0	0	0	0	0	0	0	0	0	0	0	0	0	0	0	0	0	1	0	0	0	0	0	0	0	0	1
PCDHB9	PCDHB9_c.1384G>A	p.E462K	5	140568275	G	A	FALSE	FALSE	template_unavailable	0	0	0	0	0	0	0	0	0	0	0	0	0	0	0	0	0	0	2	0	0	0	0	0	0	0	0	2
PCDHB9	PCDHB9_c.1613C>T	p.S538F	5	140568504	C	T	FALSE	FALSE	template_unavailable	0	0	0	0	0	0	0	0	0	0	0	0	0	0	0	0	0	0	2	0	0	0	0	0	0	0	0	2
PCDHB9	PCDHB9_c.1901A>G	p.D634G	5	140568792	A	G	FALSE	FALSE	template_unavailable	0	0	0	0	0	0	0	0	0	0	0	0	0	0	0	0	0	0	0	0	0	0	0	0	1	0	0	1
PCDHB9	PCDHB9_c.1990G>T	p.D664Y	5	140568881	G	T	FALSE	FALSE	template_unavailable	0	0	0	0	0	0	0	0	0	0	0	0	0	0	1	0	0	0	0	0	0	0	0	0	0	0	0	1
PCDHB9	PCDHB9_c.475G>T	p.D159Y	5	140567367	G	T	FALSE	FALSE	template_unavailable	0	0	0	0	0	0	0	0	0	0	1	0	0	0	0	0	0	0	0	0	0	0	0	0	0	0	0	1
PCDHB9	PCDHB9_c.605G>A	p.R202Q	5	140567497	G	A	FALSE	FALSE	template_unavailable	0	0	0	0	0	0	0	0	0	0	0	0	0	0	0	0	0	0	1	0	0	0	0	0	0	0	0	1
PCLO	PCLO_c.10345G>A	p.D3449N	7	82579559	C	T	FALSE	FALSE	template_unavailable	0	0	0	0	1	0	0	0	0	0	0	0	0	0	0	0	0	0	0	0	0	0	0	0	0	0	0	1
PCLO	PCLO_c.10864G>A	p.V3622I	7	82579040	C	T	FALSE	FALSE	template_unavailable	0	1	0	0	0	0	0	0	0	0	0	0	0	0	0	0	0	0	0	0	0	0	0	0	0	0	0	1
PCLO	PCLO_c.11488G>A	p.D3830N	7	82545814	C	T	FALSE	FALSE	template_unavailable	0	0	0	0	0	0	0	0	0	0	0	0	0	0	0	0	0	0	1	0	0	0	0	0	0	0	0	1
PCLO	PCLO_c.12404G>A	p.G4135E	7	82544898	C	T	FALSE	FALSE	template_unavailable	0	0	0	0	0	0	0	0	0	0	0	0	0	0	0	0	0	0	1	0	0	0	0	0	0	0	0	1
PCLO	PCLO_c.12692C>T	p.S4231F	7	82544610	G	A	FALSE	FALSE	template_unavailable	0	0	0	0	0	0	0	0	0	0	0	0	0	0	0	0	0	0	5	0	0	0	0	0	0	0	0	5
PCLO	PCLO_c.13385A>G	p.K4462R	7	82538245	T	C	FALSE	FALSE	template_unavailable	0	0	0	0	0	0	0	0	0	0	0	0	0	0	0	1	0	0	0	0	0	0	0	0	0	0	0	1
PCLO	PCLO_c.3976A>C	p.T1326P	7	82595128	T	G	FALSE	FALSE	template_unavailable	0	0	0	0	0	0	0	0	0	0	0	0	0	0	1	0	0	0	0	0	0	0	0	0	0	0	0	1
PCLO	PCLO_c.5453G>T	p.R1818I	7	82584816	C	A	FALSE	FALSE	template_unavailable	0	0	0	0	0	0	0	0	0	0	0	0	0	0	0	0	0	0	0	0	0	0	0	0	0	0	1	1
PDZD11	PDZD11_c.398G>A	p.R133H	23	69506957	C	T	TRUE	TRUE	BRDN0000552264	0	0	0	0	1	0	0	0	0	0	0	0	0	0	0	0	0	0	0	0	0	0	0	0	0	0	0	1
PEX3	PEX3_c.518G>A	p.G173E	6	143792581	G	A	TRUE	TRUE	BRDN0000554121	0	0	0	0	0	0	0	0	0	0	0	0	0	0	0	0	0	0	1	0	0	0	0	0	0	0	0	1
PIK3C2A	PIK3C2A_c.110A>G	p.E37G	11	17191179	T	C	FALSE	FALSE	template_unavailable	0	0	0	0	0	0	0	0	0	0	0	0	0	0	0	0	0	0	0	0	0	0	0	0	0	0	1	1
PIK3C2A	PIK3C2A_c.2744G>C	p.S915T	11	17141435	C	G	FALSE	FALSE	template_unavailable	0	0	0	0	0	0	0	0	1	0	0	0	0	0	0	0	0	0	0	0	0	0	0	0	0	0	0	1
PIK3C2A	PIK3C2A_c.406A>G	p.T136A	11	17190883	T	C	FALSE	FALSE	template_unavailable	0	0	0	0	0	0	0	0	0	0	0	0	0	0	1	0	0	0	0	0	0	0	0	0	0	0	0	1
PIK3C2A	PIK3C2A_c.4958G>A	p.R1653Q	11	17111388	C	T	FALSE	FALSE	template_unavailable	0	0	0	0	0	0	0	0	0	1	0	0	0	0	0	0	0	0	0	0	0	0	0	0	0	0	0	1
PIK3C2B	PIK3C2B_c.1934G>C	p.W645S	1	204424993	C	G	FALSE	FALSE	template_unavailable	0	0	0	0	0	0	0	0	0	0	0	0	0	0	0	0	0	0	0	0	0	0	0	0	1	0	0	1
PIK3C2B	PIK3C2B_c.2326C>T	p.P776S	1	204418333	G	A	FALSE	FALSE	template_unavailable	0	0	0	0	0	0	0	0	0	0	0	0	0	0	0	0	0	0	0	0	0	0	0	0	1	0	0	1
PIK3C2B	PIK3C2B_c.2628G>T	p.K876N	1	204415134	C	A	FALSE	FALSE	template_unavailable	0	0	0	0	0	0	0	0	0	1	0	0	0	0	0	0	0	0	0	0	0	0	0	0	0	0	0	1
PIK3C2B	PIK3C2B_c.2702G>A	p.R901H	1	204413529	C	T	FALSE	FALSE	template_unavailable	0	0	0	0	0	0	0	0	0	0	0	0	0	0	0	0	0	0	0	0	0	0	0	0	1	0	1	2
PIK3C2B	PIK3C2B_c.3559G>T	p.A1187S	1	204403694	C	A	FALSE	FALSE	template_unavailable	0	0	0	0	0	0	0	0	0	0	0	0	0	0	0	0	0	0	0	0	0	0	0	0	1	0	0	1
PIK3C2B	PIK3C2B_c.4067C>G	p.S1356C	1	204401416	G	C	FALSE	FALSE	template_unavailable	0	0	1	0	0	0	0	0	0	0	0	0	0	0	0	0	0	0	0	0	0	0	0	0	0	0	0	1
PIK3C2G	PIK3C2G_c.1918G>A	p.E640K	12	18544101	G	A	FALSE	FALSE	template_unavailable	0	0	0	0	0	0	0	0	0	0	0	0	0	0	1	0	0	0	0	0	0	0	0	0	0	0	0	1
PIK3C2G	PIK3C2G_c.2629C>T	p.P877S	12	18644451	C	T	FALSE	FALSE	template_unavailable	0	0	0	0	0	0	0	0	0	0	0	0	0	0	0	0	0	0	2	0	0	0	0	0	0	0	0	2
PIK3C2G	PIK3C2G_c.3097G>A	p.D1033N	12	18658292	G	A	FALSE	FALSE	template_unavailable	0	0	0	0	0	0	0	0	0	0	0	0	1	0	0	0	0	0	0	0	0	0	0	0	0	0	0	1
PIK3C2G	PIK3C2G_c.3206G>A	p.R1069Q	12	18691095	G	A	FALSE	FALSE	template_unavailable	0	0	0	0	0	0	0	0	0	0	0	0	0	0	0	0	0	0	2	0	0	0	0	0	0	0	0	2
PIK3C2G	PIK3C2G_c.3296G>T	p.C1099F	12	18691185	G	T	FALSE	FALSE	template_unavailable	0	0	0	0	0	0	0	0	0	0	0	0	0	0	0	1	0	0	0	0	0	0	0	0	0	0	0	1
PIK3C2G	PIK3C2G_c.3487G>A	p.E1163K	12	18715656	G	A	FALSE	FALSE	template_unavailable	0	0	0	0	0	0	0	1	0	0	0	0	0	0	0	0	0	0	0	0	0	0	0	0	0	0	0	1
PIK3C2G	PIK3C2G_c.3581A>G	p.Q1194R	12	18715750	A	G	FALSE	FALSE	template_unavailable	0	0	0	0	0	0	0	0	0	0	0	0	0	0	0	0	0	0	0	0	0	0	0	0	0	0	1	1
PIK3C2G	PIK3C2G_c.4312T>A	p.Y1438N	12	18800936	T	A	FALSE	FALSE	template_unavailable	0	0	0	0	0	0	0	1	0	0	0	0	0	0	0	0	0	0	0	0	0	0	0	0	0	0	0	1
PIK3CA	PIK3CA_c.3134A>T	p.D1045V	3	178952079	A	T	TRUE	TRUE	BRDN0000553570	0	0	0	0	0	0	0	0	0	0	0	0	0	0	0	1	0	0	0	0	0	0	0	0	0	0	0	1
PIK3CA	PIK3CA_c.3139C>T	p.H1047Y	3	178952084	C	T	TRUE	TRUE	BRDN0000553657	0	0	0	0	0	0	0	0	0	0	0	0	0	0	0	0	0	0	0	0	0	0	0	0	0	0	1	1
PIK3CA	PIK3CA_c.1030G>A	p.V344M	3	178921548	G	A	TRUE	FALSE	failed_QC	0	0	0	0	0	0	0	0	0	1	0	0	0	0	0	0	0	0	0	0	0	0	0	0	0	0	2	3
PIK3CA	PIK3CA_c.1624G>A	p.E542K	3	178936082	G	A	TRUE	FALSE	failed_QC	0	2	21	0	2	0	0	0	3	1	12	1	1	0	3	3	0	0	0	0	0	0	1	0	3	0	9	64
PIK3CA	PIK3CA_c.1633G>A	p.E545K	3	178936091	G	A	TRUE	FALSE	failed_QC	0	7	38	0	8	0	0	0	1	3	16	2	0	0	7	8	0	0	2	0	1	0	1	0	5	0	10	112
PIK3CA	PIK3CA_c.1633G>C	p.E545Q	3	178936091	G	C	TRUE	FALSE	failed_QC	0	1	0	0	1	0	0	0	1	0	0	0	0	0	0	0	0	0	0	0	0	0	0	0	0	0	0	3
PIK3CA	PIK3CA_c.1929A>C	p.Q643H	3	178937754	A	C	TRUE	FALSE	failed_QC	0	0	0	0	0	0	0	0	0	0	0	0	0	0	0	0	0	0	0	0	0	0	0	0	0	0	1	1
PIK3CA	PIK3CA_c.3145G>C	p.G1049R	3	178952090	G	C	TRUE	FALSE	failed_QC	0	0	1	0	0	0	0	0	0	0	0	1	0	0	0	0	0	0	0	0	0	0	0	0	0	0	1	3
PIK3CB	PIK3CB_c.3143C>T	p.A1048V	3	138374301	G	A	TRUE	TRUE	BRDN0000553328	0	0	0	0	0	0	0	0	0	0	0	0	0	0	0	0	0	0	0	0	0	0	0	0	0	0	1	1
PIK3CB	PIK3CB_c.1778C>T	p.A593V	3	138413742	G	A	TRUE	TRUE	BRDN0000553912	0	0	0	0	0	0	0	0	0	0	0	0	0	0	0	0	0	0	0	0	0	0	0	0	0	0	1	1
PIK3CB	PIK3CB_c.1491G>C	p.E497D	3	138426040	C	G	TRUE	TRUE	BRDN0000560905	0	0	1	0	0	0	0	0	0	0	0	0	0	0	0	0	0	0	0	0	0	0	0	0	0	0	0	1
PIK3CG	PIK3CG_c.502G>A	p.V168M	7	106508508	G	A	TRUE	TRUE	BRDN0000553353	0	0	0	0	0	0	0	0	1	0	0	0	0	0	0	0	0	0	0	0	0	0	0	0	0	0	0	1
PIK3CG	PIK3CG_c.2918A>G	p.K973R	7	106526625	A	G	TRUE	TRUE	BRDN0000554141	0	0	0	0	0	0	0	0	0	0	0	0	0	0	1	0	0	0	0	0	0	0	0	0	0	0	0	1
PIK3CG	PIK3CG_c.636G>T	p.W212C	7	106508642	G	T	TRUE	TRUE	BRDN0000554244	0	0	0	0	0	0	0	0	0	0	0	0	0	0	0	1	0	0	0	0	0	0	0	0	0	0	0	1
PIK3CG	PIK3CG_c.1132G>A	p.D378N	7	106509138	G	A	TRUE	FALSE	failed_QC	0	0	0	0	0	0	0	0	0	0	0	0	0	0	0	0	0	0	0	0	0	0	0	0	0	0	1	1
PIK3CG	PIK3CG_c.1337C>T	p.S446F	7	106509343	C	T	TRUE	FALSE	failed_QC	0	0	0	0	0	0	0	0	0	0	1	0	0	0	0	0	0	0	0	0	0	0	0	0	0	0	0	1
PIK3CG	PIK3CG_c.502G>T	p.V168L	7	106508508	G	T	TRUE	FALSE	failed_QC	0	0	0	0	0	0	0	0	0	0	0	0	0	0	0	1	0	0	0	0	0	0	0	0	0	0	0	1
PIK3CG	PIK3CG_c.572G>A	p.R191H	7	106508578	G	A	TRUE	FALSE	failed_QC	0	0	0	0	0	0	0	0	0	0	0	0	0	1	0	0	0	0	0	0	0	0	0	0	0	0	0	1
PIK3CG	PIK3CG_c.799G>A	p.E267K	7	106508805	G	A	TRUE	FALSE	failed_QC	0	0	0	0	0	0	0	0	0	0	0	0	0	0	0	0	0	0	3	0	0	0	0	0	0	0	0	3
PIK3IP1	PIK3IP1_c.554G>A	p.G185E	22	31685334	C	T	TRUE	TRUE	BRDN0000552469	0	0	1	0	0	0	0	0	0	0	0	0	0	0	0	0	0	0	0	0	0	0	0	0	0	0	0	1
PIK3R1	PIK3R1_c.1126G>A	p.G376R	5	67589138	G	A	TRUE	FALSE	failed_QC	0	0	0	0	0	0	0	0	0	4	0	0	0	1	0	0	0	0	0	0	0	0	0	0	0	0	0	5
PIK3R1	PIK3R1_c.1135A>G	p.K379E	5	67589147	A	G	TRUE	FALSE	failed_QC	0	0	0	0	0	0	0	0	0	1	0	0	0	0	0	0	0	0	0	0	0	0	0	0	0	0	0	1
PIK3R1	PIK3R1_c.1390G>A	p.D464N	5	67589627	G	A	TRUE	FALSE	failed_QC	0	0	1	0	0	0	0	0	0	0	0	0	0	0	0	0	0	0	0	0	0	0	0	0	0	0	0	1
PIK3R1	PIK3R1_c.1390G>T	p.D464Y	5	67589627	G	T	TRUE	FALSE	failed_QC	0	0	0	0	0	0	0	0	0	0	0	0	0	0	1	0	0	0	0	0	0	0	0	0	0	0	0	1
PIK3R1	PIK3R1_c.1699A>G	p.K567E	5	67591106	A	G	TRUE	FALSE	failed_QC	0	0	0	0	0	0	0	0	1	0	0	0	0	0	0	0	0	0	0	0	0	0	0	0	0	0	2	3
PIK3R1	PIK3R1_c.1721G>C	p.R574T	5	67591128	G	C	TRUE	FALSE	failed_QC	0	0	0	0	0	0	0	0	0	0	0	0	0	0	0	0	0	0	0	0	0	0	0	0	0	0	1	1
PIK3R1	PIK3R1_c.868A>G	p.I290V	5	67576786	A	G	TRUE	FALSE	failed_QC	0	0	0	0	0	0	0	0	0	0	1	0	0	0	0	0	0	0	0	0	0	0	0	0	0	0	0	1
PIK3R2	PIK3R2_c.1117G>A	p.G373R	19	18273784	G	A	FALSE	FALSE	template_unavailable	0	0	0	0	0	0	0	0	0	0	0	0	0	0	0	0	0	0	0	0	0	0	0	0	0	0	2	2
PIK3R2	PIK3R2_c.1705C>A	p.Q569K	19	18278085	C	A	FALSE	FALSE	template_unavailable	0	0	0	0	0	0	0	0	0	0	0	1	0	0	0	0	0	0	0	0	0	0	0	0	0	0	0	1
PIK3R3	PIK3R3_c.1147C>T	p.R383C	1	46511630	G	A	TRUE	TRUE	BRDN0000553096	0	0	0	0	1	0	0	0	0	0	0	0	0	0	0	0	0	0	0	0	0	0	0	0	1	0	0	2
PIK3R4	PIK3R4_c.3625G>A	p.E1209K	3	130400418	C	T	TRUE	TRUE	BRDN0000553434	0	0	0	0	1	0	0	0	0	0	0	0	0	0	0	0	0	0	0	0	0	0	0	0	0	0	0	1
PIK3R4	PIK3R4_c.2609A>C	p.N870T	3	130425904	T	G	TRUE	TRUE	BRDN0000553842	0	0	0	0	1	0	0	0	0	0	0	0	0	0	0	0	0	0	0	0	0	0	0	0	0	0	0	1
PIK3R4	PIK3R4_c.2993G>A	p.R998Q	3	130422672	C	T	TRUE	TRUE	BRDN0000553932	0	0	0	0	0	0	0	0	0	0	0	0	0	0	0	0	0	0	1	0	0	0	0	0	0	0	0	1
PIK3R4	PIK3R4_c.3566G>A	p.R1189H	3	130403135	C	T	TRUE	FALSE	failed_QC	0	0	0	0	0	0	0	0	0	0	0	0	0	0	0	0	0	0	0	0	0	0	0	0	0	0	1	1
PIK3R4	PIK3R4_c.572G>T	p.R191L	3	130463491	C	A	TRUE	FALSE	failed_QC	0	0	0	0	0	0	0	0	0	0	0	0	0	0	1	0	0	0	0	0	0	0	0	0	0	0	0	1
PLA2G4A	PLA2G4A_c.1318G>A	p.E440K	1	186919842	G	A	FALSE	FALSE	template_unavailable	0	0	0	0	0	0	0	0	0	0	0	0	0	0	0	0	0	0	1	0	0	0	0	0	0	0	0	1
PLA2G4A	PLA2G4A_c.1598G>A	p.R533Q	1	186934559	G	A	FALSE	FALSE	template_unavailable	0	0	0	0	1	0	0	0	0	0	0	0	0	0	0	0	0	0	0	0	0	0	0	0	0	0	0	1
PLA2G4A	PLA2G4A_c.1904C>T	p.P635L	1	186946864	C	T	FALSE	FALSE	template_unavailable	0	0	0	0	0	0	0	0	0	0	0	0	0	0	0	0	0	0	1	0	0	0	0	0	0	0	0	1
PLA2G4A	PLA2G4A_c.294G>A	p.M98I	1	186863259	G	A	FALSE	FALSE	template_unavailable	0	0	0	0	0	0	0	0	0	1	0	0	0	0	0	0	0	0	0	0	0	0	0	0	0	0	0	1
PLA2G4A	PLA2G4A_c.601G>A	p.A201T	1	186901937	G	A	FALSE	FALSE	template_unavailable	0	0	0	0	0	0	0	0	0	0	0	0	0	0	0	0	0	0	1	0	0	0	0	0	0	0	0	1
PNKP	PNKP_c.896C>T	p.P299L	19	50365835	G	A	TRUE	FALSE	failed_QC	0	0	0	0	1	0	0	0	0	0	0	0	0	0	0	0	0	0	0	0	0	0	0	0	0	0	0	1
POM121L12	POM121L12_c.234C>G	p.I78M	7	53103598	C	G	FALSE	FALSE	template_unavailable	0	0	0	0	0	0	0	0	0	0	1	0	0	0	0	0	0	0	0	0	0	0	0	0	0	0	0	1
POM121L12	POM121L12_c.269A>T	p.Q90L	7	53103633	A	T	FALSE	FALSE	template_unavailable	0	0	0	0	0	0	0	0	0	0	0	0	0	0	0	0	0	1	0	0	0	0	0	0	0	0	0	1
POM121L12	POM121L12_c.296G>A	p.R99H	7	53103660	G	A	FALSE	FALSE	template_unavailable	0	0	0	0	0	0	0	0	0	0	0	0	0	0	0	0	0	1	0	0	0	0	0	0	0	0	1	2
POM121L12	POM121L12_c.425C>T	p.A142V	7	53103789	C	T	FALSE	FALSE	template_unavailable	0	0	0	0	0	0	0	0	0	0	1	0	0	0	0	0	0	0	1	0	0	0	0	0	0	0	0	2
POM121L12	POM121L12_c.518G>T	p.C173F	7	53103882	G	T	FALSE	FALSE	template_unavailable	0	0	0	0	0	0	0	0	0	0	1	0	0	0	0	0	0	0	0	0	0	0	0	0	0	0	0	1
POM121L12	POM121L12_c.590G>T	p.W197L	7	53103954	G	T	FALSE	FALSE	template_unavailable	0	0	0	0	0	0	0	0	0	0	1	0	0	0	0	0	0	0	0	0	0	0	0	0	0	0	0	1
POM121L12	POM121L12_c.715A>T	p.S239C	7	53104079	A	T	FALSE	FALSE	template_unavailable	0	0	0	0	0	0	0	0	0	0	0	0	0	0	1	0	0	0	0	0	0	0	0	0	0	0	0	1
POM121L12	POM121L12_c.818C>T	p.P273L	7	53104182	C	T	FALSE	FALSE	template_unavailable	0	0	0	0	0	0	0	0	0	0	0	0	0	0	0	0	0	0	1	0	0	0	0	0	0	0	0	1
POT1	POT1_c.227G>T	p.G76V	7	124510993	C	A	TRUE	TRUE	BRDN0000553163	0	0	0	0	0	0	0	0	0	0	0	0	0	0	1	0	0	0	0	0	0	0	0	0	0	0	0	1
POT1	POT1_c.794T>A	p.L265H	7	124493101	A	T	TRUE	TRUE	BRDN0000553767	0	0	0	0	0	0	0	0	0	0	0	0	0	0	1	0	0	0	0	0	0	0	0	0	0	0	0	1
POT1	POT1_c.1162C>A	p.L388M	7	124482862	G	T	TRUE	TRUE	BRDN0000553788	0	0	0	0	0	0	0	0	0	0	0	0	0	0	0	0	0	0	0	0	0	0	0	0	0	0	1	1
POTED	POTED_c.384C>A	p.F128L	21	14982933	C	A	FALSE	FALSE	template_unavailable	0	0	0	0	0	0	0	0	0	1	0	0	0	0	0	0	0	0	0	0	0	0	0	0	0	0	0	1
POTED	POTED_c.724G>A	p.A242T	21	14987805	G	A	FALSE	FALSE	template_unavailable	0	0	0	0	0	0	0	0	0	1	0	0	0	0	0	0	0	0	0	0	0	0	0	0	0	0	0	1
POU2F2	POU2F2_c.715A>G	p.T239A	19	42600030	T	C	TRUE	FALSE	failed_QC	0	0	0	0	0	0	0	2	0	0	0	0	0	0	0	0	0	0	0	0	0	0	0	0	0	0	0	2
POU2F2	POU2F2_c.893G>A	p.R298H	19	42599758	C	T	TRUE	FALSE	failed_QC	0	0	0	0	0	0	0	0	0	0	1	0	0	0	0	0	0	0	0	0	0	0	0	0	0	0	0	1
PPIAL4G	PPIAL4G_c.103A>C	p.N35H	1	143767746	T	G	TRUE	TRUE	BRDN0000552334	0	0	0	0	0	0	0	0	0	0	0	0	0	0	0	0	0	0	1	0	0	0	0	0	0	0	0	1
PPP2R1A	PPP2R1A_c.428C>T	p.S143F	19	52714670	C	T	TRUE	TRUE	BRDN0000552989	0	0	0	0	0	0	0	0	0	0	0	0	0	0	0	0	0	0	1	0	0	0	0	0	0	0	0	1
PPP2R1A	PPP2R1A_c.773G>A	p.R258H	19	52716329	G	A	TRUE	TRUE	BRDN0000553736	0	0	0	0	1	0	0	0	0	0	0	0	0	0	1	0	0	0	0	0	0	0	0	0	0	0	1	3
PPP2R1A	PPP2R1A_c.548G>A	p.R183Q	19	52715983	G	A	TRUE	FALSE	failed_QC	0	0	0	0	1	0	0	0	0	0	1	0	0	0	0	0	0	0	0	0	0	0	0	0	1	0	0	3
PPP2R1A	PPP2R1A_c.771G>T	p.W257C	19	52716327	G	T	TRUE	FALSE	failed_QC	0	0	0	0	0	0	0	0	0	0	0	0	0	0	0	0	0	0	0	0	1	0	0	0	0	0	0	1
PPP6C	PPP6C_c.538G>A	p.E180K	9	127915943	C	T	TRUE	TRUE	BRDN0000552461	0	0	0	0	1	0	0	0	0	0	0	0	0	0	0	0	0	0	0	0	0	0	0	0	0	0	0	1
PPP6C	PPP6C_c.790C>T	p.R264C	9	127912080	G	A	TRUE	TRUE	BRDN0000560730	0	0	0	0	0	0	0	0	0	0	0	0	0	0	0	1	0	0	7	0	0	0	0	0	0	0	0	8
PRB3	PRB3_c.179G>A	p.R60Q	12	11421004	C	T	TRUE	FALSE	failed_QC	0	0	0	0	0	0	0	0	0	0	0	0	0	0	0	0	0	0	1	0	0	0	0	0	0	0	0	1
PRB3	PRB3_c.253G>A	p.G85R	12	11420930	C	T	TRUE	FALSE	failed_QC	0	0	0	0	0	0	0	0	0	0	0	0	0	0	0	0	0	0	1	0	0	0	0	0	0	0	0	1
PRB3	PRB3_c.604G>A	p.G202R	12	11420579	C	T	TRUE	FALSE	failed_QC	0	0	0	0	0	0	0	0	0	0	0	0	0	0	0	0	0	0	1	0	0	0	0	0	0	0	0	1
PRDM1	PRDM1_c.1076C>T	p.T359M	6	106553111	C	T	TRUE	FALSE	failed_QC	0	0	0	0	1	0	0	0	0	0	0	0	0	0	0	0	0	0	0	0	0	0	0	0	0	0	1	2
PRDM1	PRDM1_c.1629C>A	p.S543R	6	106553664	C	A	TRUE	FALSE	failed_QC	0	0	1	0	0	0	0	0	0	0	0	0	0	0	0	0	0	0	0	0	0	0	0	0	0	0	0	1
PRDM1	PRDM1_c.1916G>A	p.R639K	6	106554799	G	A	TRUE	FALSE	failed_QC	0	0	0	0	0	0	0	0	0	0	0	0	0	0	0	0	0	0	1	0	0	0	0	0	0	0	0	1
PRDM1	PRDM1_c.355G>A	p.E119K	6	106543553	G	A	FALSE	FALSE	template_unavailable	0	0	0	0	0	0	0	0	0	0	0	0	0	0	0	0	0	0	2	0	0	0	0	0	0	0	0	2
PRDM9	PRDM9_c.1766T>A	p.F589Y	5	23526963	T	A	FALSE	FALSE	template_unavailable	0	0	0	0	0	0	0	0	1	0	0	0	0	0	0	0	0	0	0	0	0	0	0	0	0	0	0	1
PRDM9	PRDM9_c.2294G>C	p.R765T	5	23527491	G	C	FALSE	FALSE	template_unavailable	0	0	1	0	0	0	0	0	0	0	0	0	0	0	0	0	0	0	0	0	0	0	0	0	0	0	0	1
PRDM9	PRDM9_c.2476C>A	p.H826N	5	23527673	C	A	FALSE	FALSE	template_unavailable	0	0	0	0	0	0	0	0	0	0	0	0	0	0	1	0	0	0	0	0	0	0	0	0	0	0	0	1
PRDM9	PRDM9_c.2560C>T	p.H854Y	5	23527757	C	T	FALSE	FALSE	template_unavailable	0	0	0	0	1	0	0	0	0	0	0	0	0	0	0	0	0	0	0	0	0	0	0	0	0	0	0	1
PRDM9	PRDM9_c.277G>A	p.E93K	5	23510112	G	A	FALSE	FALSE	template_unavailable	0	0	0	0	0	0	0	0	0	0	0	0	0	0	0	0	0	0	1	0	0	0	0	0	0	0	0	1
PRDM9	PRDM9_c.728C>T	p.P243L	5	23522840	C	T	FALSE	FALSE	template_unavailable	0	0	0	0	0	0	0	0	0	0	0	0	0	0	0	0	0	0	1	0	0	0	0	0	0	0	0	1
PRDM9	PRDM9_c.942C>A	p.N314K	5	23523459	C	A	FALSE	FALSE	template_unavailable	0	0	0	0	0	0	0	0	0	0	0	0	0	0	1	0	0	0	0	0	0	0	0	0	0	0	0	1
PRDM9	PRDM9_c.95C>T	p.S32F	5	23509604	C	T	FALSE	FALSE	template_unavailable	0	0	0	0	0	0	0	0	0	0	0	0	0	0	0	0	0	0	2	0	0	0	0	0	0	0	0	2
PROS1	PROS1_c.1070G>A	p.G357E	3	93611862	C	T	FALSE	FALSE	template_unavailable	0	0	0	0	0	0	0	0	0	0	0	0	0	0	0	0	0	0	1	0	0	0	0	0	0	0	0	1
PROS1	PROS1_c.1544G>A	p.R515H	3	93598107	C	T	FALSE	FALSE	template_unavailable	0	0	0	0	1	0	0	0	0	0	0	0	0	0	0	0	0	0	0	0	0	0	0	0	2	0	0	3
PROS1	PROS1_c.1697G>C	p.S566T	3	93595983	C	G	FALSE	FALSE	template_unavailable	0	0	0	0	0	0	0	0	0	0	0	0	0	0	0	0	0	0	1	0	0	0	0	0	0	0	0	1
PROS1	PROS1_c.592G>T	p.D198Y	3	93624637	C	A	FALSE	FALSE	template_unavailable	0	0	0	0	1	0	0	0	0	0	0	0	0	0	1	0	0	0	0	0	0	0	0	0	0	0	0	2
PROS1	PROS1_c.946C>T	p.R316C	3	93615439	G	A	FALSE	FALSE	template_unavailable	0	0	0	0	0	0	0	0	0	0	0	0	0	0	0	1	0	0	4	0	0	0	0	0	0	0	0	5
PRPF38B	PRPF38B_c.1030G>T	p.D344Y	1	109242031	G	T	FALSE	FALSE	template_unavailable	0	0	0	0	0	0	0	0	0	0	0	0	0	0	1	0	0	0	0	0	0	0	0	0	0	0	0	1
PRPF38B	PRPF38B_c.317C>T	p.T106I	1	109238364	C	T	FALSE	FALSE	template_unavailable	0	0	0	0	0	0	0	0	0	0	0	0	0	0	0	0	0	0	0	0	0	0	0	0	0	1	0	1
PRR23B	PRR23B_c.418G>A	p.E140K	3	138739086	C	T	TRUE	TRUE	BRDN0000552480	0	0	0	0	0	0	0	0	0	0	0	0	0	0	0	0	0	0	1	0	0	0	0	0	0	0	0	1
PRR23B	PRR23B_c.735C>A	p.H245Q	3	138738769	G	T	TRUE	TRUE	BRDN0000552492	0	0	0	0	0	0	0	0	0	0	0	0	0	0	1	0	0	0	0	0	0	0	0	0	0	0	0	1
PRR23B	PRR23B_c.736G>A	p.A246T	3	138738768	C	T	TRUE	TRUE	BRDN0000560829	0	0	0	0	0	0	0	0	0	0	0	0	0	0	0	0	0	0	0	0	0	0	0	0	0	0	1	1
PRUNE	PRUNE_c.819C>G	p.F273L	1	151001306	C	G	FALSE	FALSE	template_unavailable	0	1	0	0	0	0	0	0	0	0	0	0	0	0	0	0	0	0	0	0	0	0	0	0	0	0	0	1
PSG11	PSG11_c.600G>T	p.R200S	19	43523031	C	A	TRUE	FALSE	failed_QC	0	0	0	0	0	0	0	0	0	0	0	0	0	0	1	0	0	0	0	0	0	0	0	0	0	0	0	1
PSG11	PSG11_c.740C>T	p.S247L	19	43519492	G	A	TRUE	FALSE	failed_QC	0	0	0	0	0	0	0	0	0	0	0	0	0	0	0	0	0	0	1	0	0	0	0	0	0	0	0	1
PSG2	PSG2_c.794C>G	p.S265C	19	43576022	G	C	TRUE	TRUE	BRDN0000552467	0	0	0	0	0	0	0	0	0	0	0	0	0	0	0	1	0	0	0	0	0	0	0	0	0	0	0	1
PSG2	PSG2_c.733C>T	p.H245Y	19	43576083	G	A	TRUE	TRUE	BRDN0000552498	0	0	0	0	0	0	0	0	0	0	0	0	0	0	0	0	0	0	1	0	0	0	0	0	0	0	0	1
PSIP1	PSIP1_c.1211G>C	p.R404P	9	15468837	C	G	FALSE	FALSE	template_unavailable	0	0	0	0	0	0	0	0	0	0	0	0	0	0	0	1	0	0	0	0	0	0	0	0	0	0	0	1
PSIP1	PSIP1_c.896G>C	p.R299T	9	15472711	C	G	FALSE	FALSE	template_unavailable	0	0	0	0	0	0	0	0	0	0	1	0	0	0	0	0	0	0	0	0	0	0	0	0	0	0	0	1
PTEN	PTEN_c.379G>A	p.G127R	10	89692895	G	A	TRUE	TRUE	BRDN0000553321	0	0	0	0	0	0	0	0	0	0	0	0	0	0	0	0	0	0	0	0	0	0	0	0	0	0	2	2
PTEN	PTEN_c.698G>A	p.R233Q	10	89717673	G	A	TRUE	TRUE	BRDN0000553333	0	1	0	0	0	0	0	0	0	0	0	0	0	0	0	0	0	0	0	0	0	0	0	0	0	0	0	1
PTEN	PTEN_c.380G>T	p.G127V	10	89692896	G	T	TRUE	TRUE	BRDN0000553528	0	0	0	0	0	0	0	0	0	0	0	0	0	0	0	0	0	0	0	0	0	0	0	0	0	0	1	1
PTEN	PTEN_c.386G>T	p.G129V	10	89692902	G	T	TRUE	TRUE	BRDN0000553530	0	0	0	0	0	0	0	0	0	0	0	0	0	0	0	0	0	0	0	0	0	0	0	0	0	0	1	1
PTEN	PTEN_c.386G>A	p.G129E	10	89692902	G	A	TRUE	TRUE	BRDN0000553542	0	0	0	0	0	0	0	0	0	1	0	0	0	0	0	1	0	0	0	0	0	0	0	0	0	0	0	2
PTEN	PTEN_c.269T>C	p.F90S	10	89692785	T	C	TRUE	TRUE	BRDN0000553551	0	0	0	0	0	0	0	0	0	1	0	0	0	0	0	0	0	0	0	0	0	0	0	0	0	0	0	1
PTEN	PTEN_c.18A>T	p.K6N	10	89624244	A	T	TRUE	TRUE	BRDN0000553565	0	0	0	0	0	0	0	0	1	0	0	0	0	0	0	0	0	0	0	0	0	0	0	0	0	0	0	1
PTEN	PTEN_c.518G>A	p.R173H	10	89711900	G	A	TRUE	TRUE	BRDN0000553607	0	0	0	0	0	0	0	0	0	3	0	0	0	0	0	0	0	0	0	0	0	0	0	0	0	0	1	4
PTPN12	PTPN12_c.295G>A	p.G99R	7	77212881	G	A	TRUE	TRUE	BRDN0000553232	0	0	0	0	0	0	0	0	0	0	1	0	0	0	0	0	0	0	0	0	0	0	0	0	0	0	0	1
PTPN12	PTPN12_c.171A>C	p.E57D	7	77200466	A	C	TRUE	TRUE	BRDN0000553315	0	0	1	0	0	0	0	0	0	0	0	0	0	0	0	0	0	0	0	0	0	0	0	0	0	0	0	1
PTPN12	PTPN12_c.14A>G	p.E5G	7	77166877	A	G	TRUE	TRUE	BRDN0000560862	0	0	0	0	0	0	0	0	0	1	0	0	0	0	0	0	0	0	0	0	0	0	0	0	0	0	0	1
PXK	PXK_c.1180C>A	p.P394T	3	58385103	C	A	TRUE	FALSE	failed_QC	0	0	0	0	0	0	0	0	0	0	0	0	0	0	0	0	0	0	0	0	0	0	0	0	0	0	1	1
PXK	PXK_c.733G>T	p.D245Y	3	58381397	G	T	TRUE	FALSE	failed_QC	0	0	0	0	1	0	0	0	0	0	0	0	0	0	0	0	0	0	0	0	0	0	0	0	0	0	0	1
RAB42	RAB42_c.181G>A	p.A61T	1	28920492	G	A	TRUE	TRUE	BRDN0000552365	0	0	0	0	0	0	0	0	0	0	0	0	0	0	1	0	0	0	0	0	0	0	0	0	0	0	0	1
RAC1	RAC1_c.85C>T	p.P29S	7	6426892	C	T	TRUE	TRUE	BRDN0000560818	0	0	0	0	0	0	0	0	0	0	1	0	0	0	0	0	0	0	9	0	0	0	0	0	0	0	1	11
RARRES1	RARRES1_c.371G>A	p.G124E	3	158428691	C	T	FALSE	FALSE	template_unavailable	0	0	0	0	0	0	0	0	0	0	0	0	0	0	0	0	0	0	1	0	0	0	0	0	0	0	0	1
RASA1	RASA1_c.2738G>A	p.R913Q	5	86679577	G	A	TRUE	TRUE	BRDN0000553405	0	0	0	0	0	0	0	0	0	0	0	0	0	0	0	0	0	0	1	0	0	0	0	0	0	0	0	1
RASA1	RASA1_c.580C>T	p.R194C	5	86627205	C	T	TRUE	TRUE	BRDN0000553711	0	0	0	0	0	0	0	0	0	0	0	0	0	1	0	0	0	0	0	0	0	0	0	0	0	0	1	2
RASA1	RASA1_c.1528G>A	p.E510K	5	86659239	G	A	TRUE	TRUE	BRDN0000553990	0	0	0	0	0	0	0	0	0	0	0	0	0	0	0	0	0	0	1	0	0	0	0	0	0	0	0	1
RASA1	RASA1_c.437T>C	p.L146S	5	86564705	T	C	TRUE	TRUE	BRDN0000554073	0	0	0	0	1	0	0	0	0	0	0	0	0	0	0	0	0	0	0	0	0	0	0	0	0	0	0	1
RASA1	RASA1_c.854G>A	p.R285Q	5	86629109	G	A	TRUE	FALSE	failed_QC	0	0	0	0	1	0	0	0	0	0	0	0	0	0	0	0	0	0	0	0	0	0	0	0	0	0	0	1
RB1	RB1_c.2263T>A	p.F755I	13	49039185	T	A	TRUE	TRUE	BRDN0000553373	0	0	0	0	0	0	0	0	0	0	0	0	0	0	0	0	0	0	0	0	0	0	0	0	0	0	1	1
RB1	RB1_c.2346A>G	p.I782M	13	49039361	A	G	TRUE	TRUE	BRDN0000553464	0	0	0	0	0	0	0	0	0	0	0	0	0	0	0	0	0	0	0	0	0	0	0	0	1	0	0	1
RB1	RB1_c.1960G>C	p.V654L	13	49030485	G	C	TRUE	TRUE	BRDN0000553773	0	0	0	0	0	0	0	0	0	1	0	0	0	0	0	0	0	0	0	0	0	0	0	0	0	0	0	1
RB1	RB1_c.1648T>A	p.L550I	13	48955532	T	A	TRUE	TRUE	BRDN0000553892	0	0	1	0	0	0	0	0	0	0	0	0	0	0	0	0	0	0	0	0	0	0	0	0	0	0	0	1
RB1	RB1_c.1352G>A	p.R451H	13	48953749	G	A	TRUE	TRUE	BRDN0000560895	0	0	0	0	0	0	0	0	0	0	0	0	0	0	0	0	0	0	0	0	0	0	0	0	0	0	1	1
RB1	RB1_c.2104C>A	p.Q702K	13	49033967	C	A	TRUE	FALSE	failed_QC	0	0	0	0	0	0	0	0	0	0	0	0	0	0	0	0	0	0	0	0	1	0	0	0	0	0	0	1
RB1	RB1_c.2360G>A	p.R787Q	13	49039375	G	A	TRUE	FALSE	failed_QC	0	0	0	0	0	0	0	0	0	0	0	0	0	0	0	0	0	0	0	0	0	0	0	0	0	0	1	1
RB1	RB1_c.770A>G	p.Q257R	13	48937002	A	G	TRUE	FALSE	failed_QC	0	0	0	0	0	0	0	0	0	0	0	0	0	0	1	0	0	0	0	0	0	0	0	0	0	0	0	1
RBM10	RBM10_c.511C>T	p.R171W	23	47034426	C	T	TRUE	TRUE	BRDN0000553844	0	0	0	0	0	0	0	0	0	0	0	0	0	0	0	0	0	0	1	0	0	0	0	0	0	0	0	1
RBM10	RBM10_c.1094C>T	p.A365V	23	47039642	C	T	TRUE	FALSE	failed_QC	0	0	0	0	0	0	0	0	0	1	0	0	0	0	0	0	0	0	0	0	0	0	0	0	0	0	0	1
RBM10	RBM10_c.17G>A	p.R6H	23	47006897	G	A	TRUE	FALSE	failed_QC	0	0	0	0	0	0	0	0	0	0	0	0	0	0	1	0	0	0	0	0	0	0	0	0	0	0	0	1
RBM10	RBM10_c.997G>A	p.V333I	23	47039374	G	A	TRUE	FALSE	failed_QC	0	0	0	0	1	0	0	0	0	1	0	0	0	0	0	0	0	0	0	0	0	0	0	0	0	0	0	2
RBM11	RBM11_c.220C>T	p.R74C	21	15592007	C	T	TRUE	TRUE	BRDN0000552586	0	0	0	0	0	0	0	0	0	0	0	0	0	0	0	0	0	0	3	0	0	0	0	0	0	0	0	3
RBM11	RBM11_c.673G>A	p.G225R	21	15599441	G	A	TRUE	FALSE	failed_QC	0	0	0	0	0	0	0	0	0	0	0	0	0	0	0	0	0	0	1	0	0	0	0	0	0	0	0	1
REG1A	REG1A_c.392G>T	p.S131I	2	79350037	G	T	TRUE	TRUE	BRDN0000552265	0	0	0	0	0	0	0	0	0	0	0	0	0	0	1	0	0	0	0	0	0	0	0	0	0	0	0	1
REG1A	REG1A_c.313C>A	p.P105T	2	79349243	C	A	TRUE	TRUE	BRDN0000552399	0	0	0	0	0	0	0	0	0	0	0	0	0	0	1	0	0	0	0	0	0	0	0	0	0	0	0	1
REG1A	REG1A_c.238G>A	p.E80K	2	79349168	G	A	TRUE	TRUE	BRDN0000552435	0	0	0	0	0	0	0	0	0	0	0	0	0	0	0	1	0	0	0	0	0	0	0	0	0	0	0	1
REG1B	REG1B_c.192C>G	p.C64W	2	79313622	G	C	TRUE	TRUE	BRDN0000552312	0	0	0	0	0	0	0	0	0	0	0	0	0	0	1	0	0	0	0	0	0	0	0	0	0	0	0	1
REG1B	REG1B_c.244G>A	p.A82T	2	79313570	C	T	TRUE	TRUE	BRDN0000552368	0	0	0	0	0	0	0	1	0	0	0	0	0	0	0	0	0	0	0	0	0	0	0	0	0	0	0	1
REG1B	REG1B_c.88C>T	p.P30S	2	79314033	G	A	TRUE	TRUE	BRDN0000552392	0	0	0	0	1	0	0	0	0	0	0	0	0	0	0	0	0	0	0	0	0	0	0	0	0	0	0	1
REG1B	REG1B_c.470A>C	p.K157T	2	79312373	T	G	TRUE	TRUE	BRDN0000560813	0	0	0	0	0	0	0	0	1	0	0	0	0	0	0	0	0	0	0	0	0	0	0	0	0	0	0	1
REG3A	REG3A_c.253G>A	p.G85R	2	79385532	C	T	TRUE	TRUE	BRDN0000552404	0	0	0	0	0	0	0	0	0	0	0	0	0	0	1	0	0	0	0	0	0	0	0	0	0	0	0	1
REG3A	REG3A_c.325C>T	p.P109S	2	79385460	G	A	TRUE	TRUE	BRDN0000552431	0	0	0	0	0	0	0	0	0	0	0	0	0	0	0	0	0	0	1	0	0	0	0	0	0	0	0	1
REG3A	REG3A_c.287G>C	p.G96A	2	79385498	C	G	TRUE	FALSE	failed_QC	0	0	0	0	0	0	0	0	0	0	0	0	0	0	1	0	0	0	0	0	0	0	0	0	0	0	0	1
RGR	RGR_c.646C>T	p.P216S	10	86017664	C	T	TRUE	FALSE	failed_QC	0	0	0	0	0	0	0	0	0	0	0	0	0	0	0	0	0	0	0	0	0	0	0	0	0	0	1	1
RHOA	RHOA_c.125A>C	p.Y42S	3	49412898	T	G	TRUE	TRUE	BRDN0000552261	0	0	0	0	0	0	0	0	0	0	0	0	0	0	0	0	0	0	0	0	0	0	0	0	2	0	0	2
RHOA	RHOA_c.125A>G	p.Y42C	3	49412898	T	C	TRUE	TRUE	BRDN0000552326	0	0	0	0	0	0	0	0	0	0	0	0	0	0	0	0	0	0	0	0	0	0	0	0	2	0	0	2
RHOA	RHOA_c.118G>C	p.E40Q	3	49412905	C	G	TRUE	TRUE	BRDN0000552337	0	0	1	0	0	0	0	0	0	0	5	0	0	0	0	0	0	0	0	0	0	0	0	0	0	0	0	6
RHOA	RHOA_c.524C>T	p.T175M	3	49397700	G	A	TRUE	TRUE	BRDN0000552347	0	0	0	0	0	0	0	0	0	0	0	0	0	0	0	0	0	0	0	0	0	0	0	0	0	0	1	1
RHOA	RHOA_c.185G>A	p.G62E	3	49405953	C	T	TRUE	TRUE	BRDN0000552359	0	0	0	0	0	0	0	0	0	0	0	0	0	0	0	0	0	0	0	0	0	0	0	0	1	0	0	1
RHOA	RHOA_c.254C>T	p.S85F	3	49405884	G	A	TRUE	TRUE	BRDN0000552371	0	0	0	0	1	0	0	0	0	0	0	0	0	0	0	0	0	0	1	0	0	0	0	0	0	0	0	2
RHOA	RHOA_c.318C>G	p.F106L	3	49400019	G	C	TRUE	TRUE	BRDN0000552383	0	1	0	0	0	0	0	0	0	0	0	0	0	0	0	0	0	0	0	0	0	0	0	0	0	0	0	2
RHOA	RHOA_c.14G>A	p.R5Q	3	49413009	C	T	TRUE	TRUE	BRDN0000552395	0	0	0	0	1	0	0	0	0	0	0	0	0	0	0	0	0	0	0	0	0	0	0	0	0	0	0	1
RIMS2	RIMS2_c.1786C>G	p.P596A	8	104948855	C	G	TRUE	FALSE	failed_QC	0	0	0	0	0	0	0	1	0	0	0	0	0	0	0	0	0	0	0	0	0	0	0	0	0	0	0	1
RIMS2	RIMS2_c.2191G>T	p.G731W	8	104987664	G	T	TRUE	FALSE	failed_QC	0	0	0	0	0	0	0	0	0	0	0	0	0	0	0	1	0	0	0	0	0	0	0	0	0	0	0	1
RIMS2	RIMS2_c.2332G>T	p.D778Y	8	105001603	G	T	TRUE	FALSE	failed_QC	0	0	0	0	0	0	0	0	0	0	0	0	0	0	1	0	0	0	0	0	0	0	0	0	0	0	0	1
RIMS2	RIMS2_c.2347A>G	p.M783V	8	105001618	A	G	TRUE	FALSE	failed_QC	0	0	0	0	0	0	0	0	0	0	0	0	0	0	0	0	0	0	0	0	0	0	0	0	0	0	1	1
RIMS2	RIMS2_c.607G>A	p.A203T	8	104898100	G	A	TRUE	FALSE	failed_QC	0	0	0	0	0	0	0	0	0	0	0	0	0	0	1	0	0	0	0	0	0	0	0	0	0	0	0	1
RIMS2	RIMS2_c.866C>T	p.S289L	8	104898359	C	T	TRUE	FALSE	failed_QC	0	0	0	0	0	0	0	0	0	1	1	0	0	1	0	0	0	0	1	0	0	0	0	0	0	0	0	4
RIMS2	RIMS2_c.3613G>A	p.G1205R	8	105261011	G	A	FALSE	FALSE	template_unavailable	0	0	0	0	0	0	0	0	0	0	0	0	0	0	0	0	0	0	1	0	0	0	0	0	0	0	0	1
RIMS2	RIMS2_c.3821C>T	p.T1274M	8	105263327	C	T	FALSE	FALSE	template_unavailable	0	0	0	0	0	0	0	0	1	0	0	0	0	0	0	0	0	0	0	0	0	0	0	0	0	0	0	1
RIPK1	RIPK1_c.439G>A	p.D147N	6	3081330	G	A	FALSE	FALSE	template_unavailable	0	0	1	0	0	0	0	0	0	0	0	0	0	0	0	0	0	0	0	0	0	0	0	0	0	0	0	1
RIPK1	RIPK1_c.628G>A	p.D210N	6	3083487	G	A	FALSE	FALSE	template_unavailable	0	0	0	0	0	0	0	0	0	0	0	0	0	0	0	0	0	0	1	0	0	0	0	0	0	0	0	1
RNF212	RNF212_c.323C>A	p.S108Y	4	1079723	G	T	TRUE	FALSE	failed_QC	0	0	0	0	0	0	0	0	0	0	0	0	0	0	0	0	0	0	0	0	0	0	0	0	0	0	1	1
RNF213	RNF213_c.1829G>A	p.R610H	17	78319745	G	A	FALSE	FALSE	template_unavailable	0	0	0	0	1	0	0	0	0	0	0	0	0	0	0	0	0	0	0	0	0	0	0	0	0	0	0	1
RNF213	RNF213_c.290G>A	p.R97Q	17	78317013	G	A	FALSE	FALSE	template_unavailable	0	0	0	0	0	0	0	0	0	0	0	0	0	0	0	0	0	0	0	0	0	0	0	0	0	0	1	1
RNF213	RNF213_c.3562G>A	p.A1188T	17	78321478	G	A	FALSE	FALSE	template_unavailable	0	0	0	0	1	0	0	0	0	0	0	0	0	0	1	0	0	0	0	0	0	0	0	0	0	0	0	2
RNF213	RNF213_c.3631G>A	p.V1211I	17	78321547	G	A	FALSE	FALSE	template_unavailable	0	0	0	0	0	0	0	0	0	0	0	0	0	0	0	0	0	0	0	0	0	0	0	0	1	0	0	1
RNF213	RNF213_c.4022T>C	p.V1341A	17	78321938	T	C	FALSE	FALSE	template_unavailable	0	0	0	0	0	0	0	0	0	0	0	0	0	0	0	0	0	0	0	0	0	0	0	0	1	0	0	1
RNF213	RNF213_c.4084C>T	p.H1362Y	17	78322000	C	T	FALSE	FALSE	template_unavailable	0	0	0	0	0	0	0	0	0	0	0	0	0	0	0	1	0	0	0	0	0	0	0	0	0	0	0	1
RNF213	RNF213_c.5654C>A	p.P1885Q	17	78336981	C	A	FALSE	FALSE	template_unavailable	0	0	0	0	0	0	0	0	0	0	0	0	0	0	0	0	0	0	0	0	0	0	0	0	1	0	0	1
RNF213	RNF213_c.6269G>A	p.C2090Y	17	78341838	G	A	FALSE	FALSE	template_unavailable	0	0	0	0	0	0	0	0	0	0	0	0	0	0	0	0	0	0	0	0	0	0	0	0	1	0	0	1
ROGDI	ROGDI_c.668C>T	p.A223V	16	4847966	G	A	TRUE	FALSE	failed_QC	0	0	0	0	0	0	0	0	0	0	0	0	0	0	0	0	0	0	0	0	0	0	0	0	1	0	0	1
RPAP1	RPAP1_c.1166G>A	p.G389E	15	41820527	C	T	FALSE	FALSE	template_unavailable	0	0	0	0	0	0	0	0	0	0	0	0	0	0	0	1	0	0	0	0	0	0	0	0	0	0	0	1
RPAP1	RPAP1_c.134C>T	p.S45L	15	41829190	G	A	FALSE	FALSE	template_unavailable	0	0	0	0	1	0	0	0	0	0	0	0	0	0	0	0	0	0	0	0	0	0	0	0	0	0	0	1
RPAP1	RPAP1_c.1987C>T	p.P663S	15	41817277	G	A	FALSE	FALSE	template_unavailable	0	0	0	0	0	0	0	0	0	0	0	0	0	0	0	0	0	0	0	0	0	0	0	0	0	0	1	1
RPAP1	RPAP1_c.2455G>A	p.D819N	15	41815534	C	T	FALSE	FALSE	template_unavailable	0	0	0	0	0	0	0	0	0	0	0	0	0	0	0	0	0	0	0	1	0	0	0	0	0	0	0	1
RPS15	RPS15_c.409C>T	p.H137Y	19	1440432	C	T	FALSE	FALSE	template_unavailable	0	0	0	0	0	0	0	0	0	0	0	0	0	0	0	0	0	0	1	0	0	0	0	0	0	0	0	1
RTL1	RTL1_c.1751C>A	p.S584Y	14	101349375	G	T	FALSE	FALSE	template_unavailable	0	0	0	0	0	0	0	0	0	0	0	0	0	0	1	0	0	0	0	0	0	0	0	0	0	0	0	1
RTL1	RTL1_c.1832C>T	p.P611L	14	101349294	G	A	FALSE	FALSE	template_unavailable	0	0	0	0	0	0	0	0	0	0	0	0	0	0	0	0	0	0	1	0	0	0	0	0	0	0	0	1
RTL1	RTL1_c.1872A>T	p.Q624H	14	101349254	T	A	FALSE	FALSE	template_unavailable	0	0	0	0	0	0	0	0	0	0	1	0	0	0	0	0	0	0	0	0	0	0	0	0	0	0	0	1
RUNX1	RUNX1_c.256C>T	p.P86S	21	36259154	G	A	TRUE	FALSE	failed_QC	0	0	0	0	0	0	0	0	0	0	0	0	0	0	0	0	0	0	0	0	0	0	0	0	0	0	1	1
RUNX1	RUNX1_c.521G>A	p.R174Q	21	36231782	C	T	TRUE	FALSE	failed_QC	1	0	0	0	0	0	0	0	0	0	0	0	0	0	1	0	0	0	0	0	0	0	0	0	0	0	0	2
RYR1	RYR1_c.11209G>A	p.E3737K	19	39023326	G	A	FALSE	FALSE	template_unavailable	0	0	0	0	0	0	0	0	0	0	0	0	0	0	0	0	0	0	1	0	0	0	0	0	0	0	0	1
RYR1	RYR1_c.14707G>A	p.E4903K	19	39075643	G	A	FALSE	FALSE	template_unavailable	0	0	0	0	1	0	0	0	0	0	0	0	0	0	0	0	0	0	0	0	0	0	0	0	0	0	0	1
RYR1	RYR1_c.2479G>A	p.E827K	19	38951133	G	A	FALSE	FALSE	template_unavailable	0	0	0	0	0	0	0	0	0	0	0	0	0	0	0	0	0	0	1	0	0	0	0	0	0	0	0	1
RYR1	RYR1_c.3047G>A	p.R1016Q	19	38956907	G	A	FALSE	FALSE	template_unavailable	0	0	0	0	0	0	0	0	0	0	0	0	0	0	0	0	0	0	0	0	0	0	0	0	0	0	2	2
RYR1	RYR1_c.4339G>A	p.V1447M	19	38968395	G	A	FALSE	FALSE	template_unavailable	0	0	0	0	0	0	0	0	0	0	0	0	0	0	0	0	0	0	0	0	0	0	0	0	1	0	0	1
RYR1	RYR1_c.5480G>A	p.R1827H	19	38976775	G	A	FALSE	FALSE	template_unavailable	0	0	0	0	0	0	0	0	1	0	0	0	0	0	0	0	0	0	0	0	0	0	0	0	0	0	0	1
RYR1	RYR1_c.7778G>A	p.R2593H	19	38993310	G	A	FALSE	FALSE	template_unavailable	0	0	0	0	1	0	0	0	0	0	0	0	0	0	0	0	0	0	0	0	0	0	0	0	0	0	0	1
RYR1	RYR1_c.8112C>G	p.C2704W	19	38995432	C	G	FALSE	FALSE	template_unavailable	0	0	0	0	0	0	0	0	0	0	0	0	0	0	1	0	0	0	0	0	0	0	0	0	0	0	0	1
RYR2	RYR2_c.12400G>T	p.G4134C	1	237947412	G	T	FALSE	FALSE	template_unavailable	0	0	0	0	0	0	0	0	0	0	0	0	0	0	1	0	0	0	0	0	0	0	0	0	0	0	0	1
RYR2	RYR2_c.1244C>T	p.T415I	1	237608774	C	T	FALSE	FALSE	template_unavailable	0	0	0	0	0	0	0	0	0	0	0	0	0	0	1	0	0	0	0	0	0	0	0	0	0	0	0	1
RYR2	RYR2_c.3931G>A	p.A1311T	1	237754063	G	A	FALSE	FALSE	template_unavailable	0	0	0	0	0	0	0	0	0	0	0	0	0	0	0	0	0	0	0	0	0	0	0	0	0	0	1	1
RYR2	RYR2_c.4754G>A	p.R1585H	1	237774132	G	A	FALSE	FALSE	template_unavailable	0	0	0	0	0	0	0	0	0	0	0	0	0	0	1	0	0	0	0	0	0	0	0	0	0	0	1	2
RYR2	RYR2_c.5237A>G	p.H1746R	1	237777665	A	G	FALSE	FALSE	template_unavailable	0	0	1	0	0	0	0	0	0	0	0	0	0	0	0	0	0	0	0	0	0	0	0	0	0	0	0	1
RYR2	RYR2_c.6504C>A	p.H2168Q	1	237794790	C	A	FALSE	FALSE	template_unavailable	0	0	0	0	0	0	0	0	0	0	0	0	0	0	1	0	0	0	0	0	0	0	0	0	0	0	0	1
RYR2	RYR2_c.6614G>A	p.R2205H	1	237796936	G	A	FALSE	FALSE	template_unavailable	0	0	0	0	0	0	0	0	0	0	0	0	0	0	0	0	0	0	0	0	0	0	0	0	1	0	0	1
RYR2	RYR2_c.815G>T	p.R272L	1	237580390	G	T	FALSE	FALSE	template_unavailable	0	0	0	0	0	0	0	0	0	0	0	0	0	0	1	0	0	0	0	0	0	0	0	0	0	0	0	1
RYR3	RYR3_c.1124G>A	p.R375H	15	33855189	G	A	FALSE	FALSE	template_unavailable	0	0	0	0	0	0	0	0	0	0	0	0	0	0	0	0	0	0	1	0	0	0	0	0	0	0	1	2
RYR3	RYR3_c.14121G>A	p.M4707I	15	34150094	G	A	FALSE	FALSE	template_unavailable	0	0	0	0	0	0	0	0	0	0	0	0	0	0	0	0	0	0	1	0	0	0	0	0	0	0	0	1
RYR3	RYR3_c.1415G>T	p.R472I	15	33872323	G	T	FALSE	FALSE	template_unavailable	0	0	0	0	0	0	0	0	0	0	0	0	0	0	0	0	0	0	0	0	0	0	0	0	0	0	1	1
RYR3	RYR3_c.29A>T	p.D10V	15	33603275	A	T	FALSE	FALSE	template_unavailable	0	0	0	0	0	0	0	0	0	0	0	0	0	0	0	0	0	0	0	0	0	0	0	0	1	0	0	1
RYR3	RYR3_c.6715G>T	p.G2239W	15	34015011	G	T	FALSE	FALSE	template_unavailable	0	0	0	0	0	0	0	0	0	0	0	0	0	0	1	0	0	0	0	0	0	0	0	0	0	0	0	1
RYR3	RYR3_c.7851C>G	p.I2617M	15	34034597	C	G	FALSE	FALSE	template_unavailable	0	0	1	0	0	0	0	0	0	0	0	0	0	0	0	0	0	0	0	0	0	0	0	0	0	0	0	1
RYR3	RYR3_c.8024C>T	p.S2675F	15	34040349	C	T	FALSE	FALSE	template_unavailable	0	0	0	0	0	0	0	0	0	0	0	0	0	0	0	0	0	0	1	0	0	0	0	0	0	0	0	1
RYR3	RYR3_c.8105A>G	p.E2702G	15	34040430	A	G	FALSE	FALSE	template_unavailable	0	0	0	0	1	0	0	0	0	0	0	0	0	0	0	0	0	0	0	0	0	0	0	0	0	0	0	1
SAMHD1	SAMHD1_c.652G>C	p.D218H	20	35555629	C	G	TRUE	TRUE	BRDN0000553197	0	0	1	0	0	0	0	0	0	0	0	0	0	0	0	0	0	1	0	0	0	0	0	0	0	0	0	2
SAMHD1	SAMHD1_c.1544T>C	p.I515T	20	35526907	A	G	TRUE	TRUE	BRDN0000553275	0	0	0	0	0	0	0	0	0	0	0	0	0	0	0	0	0	0	0	0	0	0	0	0	1	0	0	1
SCEL	SCEL_c.29C>A	p.S10Y	13	78130039	C	A	TRUE	TRUE	BRDN0000553211	0	0	0	0	0	0	0	0	0	0	0	0	0	0	0	0	0	0	0	0	0	0	0	0	0	0	1	1
SCEL	SCEL_c.1081C>T	p.H361Y	13	78177254	C	T	TRUE	FALSE	failed_QC	0	0	0	0	0	0	0	0	0	0	0	0	0	0	0	0	0	0	0	0	1	0	0	0	0	0	0	1
SCEL	SCEL_c.1319G>A	p.R440K	13	78184223	G	A	TRUE	FALSE	failed_QC	0	0	0	0	0	0	0	0	0	0	0	0	0	0	0	0	0	0	1	0	0	0	0	0	0	0	0	1
SCEL	SCEL_c.959C>G	p.T320S	13	78176241	C	G	TRUE	FALSE	failed_QC	0	0	0	0	0	0	0	0	0	0	0	0	0	0	0	0	0	0	0	0	0	0	0	0	0	1	0	1
SEC61A1	SEC61A1_c.1244G>T	p.R415L	3	127786902	G	T	FALSE	FALSE	template_unavailable	0	0	0	0	0	0	0	0	0	0	0	0	0	0	1	0	0	0	0	0	0	0	0	0	0	0	0	1
SEPT7	SEPT7_c.536T>G	p.F179C	7	35919456	T	G	FALSE	FALSE	template_unavailable	0	0	0	0	0	0	0	0	0	2	0	0	0	0	0	0	0	0	0	0	0	0	0	0	0	0	0	2
SERINC5	SERINC5_c.280G>A	p.V94I	5	79473802	C	T	FALSE	FALSE	template_unavailable	0	0	0	0	0	0	0	1	0	0	0	0	0	0	0	0	0	0	0	0	0	0	0	0	0	0	0	1
SERPINB4	SERPINB4_c.410C>A	p.A137E	18	61308167	G	T	TRUE	TRUE	BRDN0000552592	0	0	0	0	0	0	0	0	0	0	0	0	0	0	1	0	0	0	0	0	0	0	0	0	0	0	0	1
SERPINB4	SERPINB4_c.1040C>A	p.T347N	18	61305086	G	T	TRUE	TRUE	BRDN0000552701	0	0	0	0	0	0	0	0	0	0	0	0	0	0	1	0	0	0	0	0	0	0	0	0	0	0	0	1
SERPINB4	SERPINB4_c.868G>A	p.E290K	18	61305258	C	T	TRUE	TRUE	BRDN0000552769	0	0	0	0	0	0	0	0	0	0	0	0	0	0	0	0	0	0	1	0	0	0	0	0	0	0	0	1
SERPINB4	SERPINB4_c.328G>A	p.E110K	18	61326656	C	T	TRUE	TRUE	BRDN0000552781	0	0	0	0	0	0	0	0	0	0	0	0	0	0	0	0	0	0	1	0	0	0	0	0	0	0	0	1
SERPINB4	SERPINB4_c.748G>A	p.E250K	18	61324085	C	T	TRUE	TRUE	BRDN0000554097	0	0	0	0	0	0	0	0	0	0	0	0	0	0	0	0	0	0	3	0	0	0	0	0	0	0	0	3
SERPINB4	SERPINB4_c.544T>A	p.F182I	18	61306936	A	T	TRUE	TRUE	BRDN0000560835	0	0	0	0	0	0	0	0	0	0	0	0	0	0	1	0	0	0	0	0	0	0	0	0	0	0	0	1
SERPINB7	SERPINB7_c.388G>A	p.D130N	18	61463551	G	A	FALSE	FALSE	template_unavailable	0	0	0	0	0	0	0	0	0	0	0	0	0	0	0	0	0	0	1	0	0	0	0	0	0	0	0	1
SERPINB7	SERPINB7_c.616G>A	p.A206T	18	61468118	G	A	FALSE	FALSE	template_unavailable	0	0	0	0	0	0	0	0	0	0	0	0	0	0	0	0	0	1	0	0	0	0	0	0	0	0	0	1
SERPINB7	SERPINB7_c.783G>C	p.W261C	18	61471509	G	C	FALSE	FALSE	template_unavailable	0	0	0	0	0	0	0	0	0	0	0	0	0	0	1	0	0	0	0	0	0	0	0	0	0	0	0	1
SERPINB7	SERPINB7_c.79A>T	p.N27Y	18	61449685	A	T	FALSE	FALSE	template_unavailable	0	0	0	0	0	0	0	0	0	0	0	0	0	1	0	0	0	0	0	0	0	0	0	0	0	0	0	1
SESN3	SESN3_c.1060T>C	p.Y354H	11	94911070	A	G	FALSE	FALSE	template_unavailable	0	0	0	0	0	0	0	0	0	0	0	0	0	0	0	0	0	0	0	0	0	0	0	0	0	0	1	1
SESN3	SESN3_c.299A>C	p.D100A	11	94924611	T	G	FALSE	FALSE	template_unavailable	0	0	0	0	0	0	0	0	0	0	0	0	0	0	0	0	0	1	0	0	0	0	0	0	0	0	0	1
SETD2	SETD2_c.3539C>T	p.P1180L	3	47162587	G	A	FALSE	FALSE	template_unavailable	0	0	0	0	1	0	0	0	0	0	0	0	0	0	0	0	0	0	0	0	0	0	0	0	0	0	0	1
SETD2	SETD2_c.4496G>A	p.C1499Y	3	47158203	C	T	FALSE	FALSE	template_unavailable	0	0	0	0	0	0	0	0	0	0	0	1	0	0	0	0	0	0	0	0	0	0	0	0	0	0	0	1
SETD2	SETD2_c.4550G>T	p.G1517V	3	47158149	C	A	FALSE	FALSE	template_unavailable	0	0	0	0	0	0	0	0	0	0	0	0	0	0	1	0	0	0	0	0	0	0	0	0	0	0	0	1
SETD2	SETD2_c.4618T>C	p.S1540P	3	47155463	A	G	FALSE	FALSE	template_unavailable	0	0	0	0	0	0	0	0	0	0	0	0	0	0	0	0	0	0	1	0	0	0	0	0	0	0	0	1
SETD2	SETD2_c.4880T>G	p.M1627R	3	47144873	A	C	FALSE	FALSE	template_unavailable	0	0	0	0	0	0	0	0	0	0	0	1	0	0	0	0	0	0	0	0	0	0	0	0	0	0	0	1
SETD2	SETD2_c.5093G>C	p.R1698T	3	47139494	C	G	FALSE	FALSE	template_unavailable	0	0	0	0	0	0	0	0	1	0	0	0	0	0	0	0	0	0	0	0	0	0	0	0	0	0	0	1
SETD2	SETD2_c.7246C>G	p.Q2416E	3	47079260	G	C	FALSE	FALSE	template_unavailable	0	0	0	0	0	0	0	0	0	0	0	0	0	0	1	0	0	0	0	0	0	0	0	0	0	0	0	1
SETD2	SETD2_c.7529G>A	p.R2510H	3	47059132	C	T	FALSE	FALSE	template_unavailable	0	0	0	0	0	0	0	0	0	0	0	1	0	0	0	0	0	0	0	0	0	0	0	0	0	0	0	1
SETDB1	SETDB1_c.1828C>T	p.R610W	1	150923181	C	T	FALSE	FALSE	template_unavailable	0	0	0	0	1	0	0	0	0	0	0	0	0	0	0	0	0	0	0	0	0	0	0	0	0	0	0	1
SETDB1	SETDB1_c.2086G>C	p.E696Q	1	150923439	G	C	FALSE	FALSE	template_unavailable	0	1	0	0	0	0	0	0	0	0	0	0	0	0	0	0	0	0	0	0	0	0	0	0	0	0	0	1
SETDB1	SETDB1_c.2288C>G	p.S763C	1	150923915	C	G	FALSE	FALSE	template_unavailable	0	0	1	0	0	0	0	0	0	0	0	0	0	0	0	0	0	0	0	0	0	0	0	0	0	0	0	1
SETDB1	SETDB1_c.2471C>T	p.A824V	1	150931794	C	T	FALSE	FALSE	template_unavailable	0	0	0	0	0	0	0	0	0	0	0	0	0	0	0	0	0	0	0	0	0	0	0	0	0	0	1	1
SETDB1	SETDB1_c.3728G>A	p.R1243H	1	150936529	G	A	FALSE	FALSE	template_unavailable	0	0	0	0	0	0	0	0	0	0	0	0	0	0	0	0	0	0	0	0	0	0	0	0	1	0	0	1
SF3B1	SF3B1_c.1866G>C	p.E622D	2	198267491	C	G	FALSE	FALSE	template_unavailable	0	0	0	1	0	0	0	0	0	0	0	0	0	0	0	0	0	0	0	0	0	0	0	0	0	0	0	1
SF3B1	SF3B1_c.1874G>T	p.R625L	2	198267483	C	A	FALSE	FALSE	template_unavailable	0	0	0	1	0	0	0	0	0	0	0	0	0	0	0	0	0	0	0	0	0	0	0	0	0	0	0	1
SF3B1	SF3B1_c.2098A>G	p.K700E	2	198266834	T	C	FALSE	FALSE	template_unavailable	0	0	7	9	0	0	0	0	0	0	0	0	0	0	0	0	0	0	0	0	0	0	0	0	0	0	0	16
SF3B1	SF3B1_c.2099A>G	p.K700R	2	198266833	T	C	FALSE	FALSE	template_unavailable	0	0	0	0	0	0	0	0	0	0	0	1	0	0	0	0	0	0	0	0	0	0	0	0	0	0	0	1
SF3B1	SF3B1_c.2219G>A	p.G740E	2	198266713	C	T	FALSE	FALSE	template_unavailable	0	0	0	1	0	0	0	0	0	0	0	0	0	0	0	0	0	0	0	0	0	0	0	0	0	0	0	1
SF3B1	SF3B1_c.2702A>G	p.Q901R	2	198265455	T	C	FALSE	FALSE	template_unavailable	0	0	0	0	0	0	0	0	0	0	0	0	0	0	0	0	0	1	0	0	0	0	0	0	0	0	0	1
SF3B1	SF3B1_c.2870G>A	p.R957Q	2	198265007	C	T	FALSE	FALSE	template_unavailable	0	0	0	0	0	0	0	0	0	0	0	0	0	0	0	0	0	0	0	0	0	0	0	0	0	0	4	4
SGCZ	SGCZ_c.119G>A	p.G40E	8	14412356	C	T	FALSE	FALSE	template_unavailable	0	0	0	0	0	0	0	0	0	0	0	0	0	0	0	0	0	0	3	0	0	0	0	0	0	0	0	3
SGCZ	SGCZ_c.238G>A	p.G80S	8	14181710	C	T	FALSE	FALSE	template_unavailable	0	0	0	0	0	0	0	0	0	0	0	0	0	0	0	0	0	0	1	0	0	0	0	0	0	0	0	1
SGCZ	SGCZ_c.656C>T	p.A219V	8	13959973	G	A	FALSE	FALSE	template_unavailable	0	0	0	0	0	0	0	0	0	0	0	0	0	0	0	0	0	0	1	0	0	0	0	0	0	0	0	1
SGCZ	SGCZ_c.848T>C	p.L283P	8	13948043	A	G	FALSE	FALSE	template_unavailable	0	0	0	0	0	0	0	0	0	0	0	0	0	0	1	0	0	0	0	0	0	0	0	0	0	0	0	1
SGCZ	SGCZ_c.96G>T	p.E32D	8	14412379	C	A	FALSE	FALSE	template_unavailable	0	0	0	0	0	0	0	0	0	0	0	0	0	0	0	0	0	0	0	0	0	0	0	0	0	0	1	1
SGK1	SGK1_c.79T>C	p.F27L	6	134495722	A	G	TRUE	TRUE	BRDN0000552695	0	0	0	0	0	0	0	1	0	0	0	0	0	0	0	0	0	0	0	0	0	0	0	0	0	0	0	1
SGK1	SGK1_c.143C>G	p.A48G	6	134495658	G	C	TRUE	TRUE	BRDN0000552977	0	0	0	0	0	0	0	1	0	0	0	0	0	0	0	0	0	0	0	0	0	0	0	0	0	0	0	1
SLC2A3	SLC2A3_c.147G>T	p.K49N	12	8085705	C	A	TRUE	TRUE	BRDN0000553023	0	0	0	0	0	0	0	0	0	0	0	0	0	0	1	0	0	0	0	0	0	0	0	0	0	0	0	1
SLC2A3	SLC2A3_c.263T>C	p.F88S	12	8085589	A	G	TRUE	TRUE	BRDN0000553042	0	0	0	0	0	0	0	0	0	0	0	0	0	0	0	0	0	0	0	0	0	0	0	0	0	0	1	1
SLC2A3	SLC2A3_c.326G>T	p.G109V	12	8084025	C	A	TRUE	TRUE	BRDN0000553051	0	0	0	0	0	0	0	0	0	0	0	0	0	0	0	0	0	0	0	0	1	0	0	0	0	0	0	1
SLC46A1	SLC46A1_c.896G>C	p.W299S	17	26731819	C	G	TRUE	TRUE	BRDN0000554049	0	0	0	1	0	0	0	0	0	0	0	0	0	0	0	0	0	0	0	0	0	0	0	0	0	0	0	1
SLC9A11	SLC9A11_c.1193G>A	p.R398Q	1	173526501	C	T	FALSE	FALSE	template_unavailable	0	0	0	0	0	0	0	0	0	0	0	1	0	0	0	0	0	0	3	0	0	0	0	0	0	0	0	4
SLC9A11	SLC9A11_c.1867C>T	p.P623S	1	173503730	G	A	FALSE	FALSE	template_unavailable	0	0	0	0	0	0	0	0	0	0	0	0	0	0	0	0	0	0	2	0	0	0	0	0	0	0	0	2
SLC9A11	SLC9A11_c.2255G>A	p.S752N	1	173499102	C	T	FALSE	FALSE	template_unavailable	0	0	0	0	0	0	0	0	0	0	0	0	0	0	0	0	0	0	0	0	0	0	0	0	0	0	1	1
SLC9A11	SLC9A11_c.2389G>A	p.D797N	1	173494043	C	T	FALSE	FALSE	template_unavailable	0	0	0	0	0	0	0	0	0	0	0	0	0	0	0	0	0	0	1	0	0	0	0	0	0	0	0	1
SLC9A11	SLC9A11_c.272C>T	p.S91L	1	173567128	G	A	FALSE	FALSE	template_unavailable	0	0	0	0	0	0	0	0	0	0	0	0	0	0	0	0	0	0	4	0	0	0	0	0	0	0	0	4
SLC9A11	SLC9A11_c.557G>A	p.G186E	1	173552728	C	T	FALSE	FALSE	template_unavailable	0	0	0	0	0	0	0	0	0	0	0	0	0	0	0	0	0	0	1	0	0	0	0	0	0	0	0	1
SLC9A11	SLC9A11_c.664A>G	p.S222G	1	173551124	T	C	FALSE	FALSE	template_unavailable	0	0	0	0	0	0	0	0	0	0	0	0	0	0	0	0	0	0	0	0	0	0	0	0	0	0	1	1
SLC9A11	SLC9A11_c.878C>T	p.P293L	1	173545824	G	A	FALSE	FALSE	template_unavailable	0	0	0	0	0	0	0	0	0	0	0	0	0	0	1	0	0	0	0	0	0	0	0	0	0	0	0	1
SLCO4C1	SLCO4C1_c.1402A>C	p.S468R	5	101592886	T	G	FALSE	FALSE	template_unavailable	0	0	0	0	0	0	0	0	1	0	0	0	0	0	0	0	0	0	0	0	0	0	0	0	0	0	0	1
SLCO4C1	SLCO4C1_c.221A>C	p.K74T	5	101631746	T	G	FALSE	FALSE	template_unavailable	0	0	0	0	1	0	0	0	0	0	0	0	0	0	0	0	0	0	0	0	0	0	0	0	0	0	0	1
SLCO4C1	SLCO4C1_c.265G>A	p.G89S	5	101631702	C	T	FALSE	FALSE	template_unavailable	0	0	0	0	0	0	0	0	0	0	0	0	0	0	0	0	0	0	0	0	0	0	0	0	0	0	1	1
SLCO4C1	SLCO4C1_c.514C>T	p.P172S	5	101627152	G	A	FALSE	FALSE	template_unavailable	0	0	0	0	0	0	0	0	0	0	0	0	0	0	0	0	0	0	1	0	0	0	0	0	0	0	0	1
SLCO4C1	SLCO4C1_c.830G>A	p.G277D	5	101599457	C	T	FALSE	FALSE	template_unavailable	0	0	0	0	0	0	0	0	0	0	0	0	0	0	0	0	0	0	0	0	0	0	0	0	0	0	1	1
SLCO4C1	SLCO4C1_c.959T>C	p.L320P	5	101597678	A	G	FALSE	FALSE	template_unavailable	0	0	0	0	0	0	0	0	0	0	0	1	0	0	0	0	0	0	0	0	0	0	0	0	0	0	0	1
SLIT1	SLIT1_c.1124G>A	p.G375D	10	98817000	C	T	FALSE	FALSE	template_unavailable	0	0	0	0	0	0	0	0	0	0	0	1	0	0	0	0	0	0	0	0	0	0	0	0	0	0	0	1
SLIT1	SLIT1_c.1422C>A	p.N474K	10	98808755	G	T	FALSE	FALSE	template_unavailable	0	0	0	0	0	0	0	0	0	0	0	0	0	0	1	0	0	0	0	0	0	0	0	0	0	0	0	1
SLIT1	SLIT1_c.1531G>A	p.V511M	10	98807550	C	T	FALSE	FALSE	template_unavailable	0	0	0	0	0	0	0	0	0	0	0	0	0	0	1	0	0	0	0	0	0	0	0	0	0	0	0	1
SLIT1	SLIT1_c.2522G>A	p.G841D	10	98790574	C	T	FALSE	FALSE	template_unavailable	0	0	0	0	0	0	0	0	0	0	0	0	0	0	0	0	0	0	1	0	0	0	0	0	0	0	0	1
SLIT1	SLIT1_c.4439C>T	p.T1480M	10	98761035	G	A	FALSE	FALSE	template_unavailable	0	0	0	0	0	0	0	0	0	0	0	0	0	0	0	0	0	0	0	0	0	0	1	0	0	0	0	1
SLIT1	SLIT1_c.814G>A	p.V272M	10	98820524	C	T	FALSE	FALSE	template_unavailable	0	0	0	0	0	0	0	0	0	0	0	0	0	0	1	0	0	0	0	0	0	0	0	0	0	0	0	1
SMAD2	SMAD2_c.911A>G	p.D304G	18	45374932	T	C	TRUE	TRUE	BRDN0000554029	0	0	0	0	1	0	0	0	0	0	0	0	0	0	0	0	0	0	0	0	0	0	0	0	0	0	0	1
SMAD2	SMAD2_c.962G>A	p.R321Q	18	45374881	C	T	TRUE	FALSE	failed_QC	0	0	0	0	2	0	0	0	0	0	0	0	0	0	0	0	0	0	0	0	0	0	0	0	1	0	0	3
SMAD4	SMAD4_c.1082G>C	p.R361P	18	48591919	G	C	TRUE	TRUE	BRDN0000552996	0	0	0	0	0	0	0	0	0	0	0	0	0	0	0	0	0	0	0	0	0	0	0	0	1	0	0	1
SMAD4	SMAD4_c.290G>A	p.R97H	18	48575096	G	A	TRUE	TRUE	BRDN0000553062	0	0	0	0	1	0	0	0	0	0	0	0	0	0	0	0	0	0	0	0	0	0	0	0	0	0	1	2
SMAD4	SMAD4_c.1609G>T	p.D537Y	18	48604787	G	T	TRUE	TRUE	BRDN0000553080	0	0	0	0	1	0	0	0	0	0	0	0	0	0	0	0	0	0	0	0	0	0	0	0	0	0	0	1
SMAD4	SMAD4_c.1557A>C	p.K519N	18	48604735	A	C	TRUE	TRUE	BRDN0000553134	0	0	0	0	0	0	0	0	0	0	0	0	0	0	0	0	0	0	0	0	0	0	0	0	0	0	1	1
SMAD4	SMAD4_c.400G>A	p.E134K	18	48575206	G	A	TRUE	TRUE	BRDN0000553178	0	0	0	0	1	0	0	0	0	0	0	0	0	0	0	0	0	0	0	0	0	0	0	0	0	0	0	1
SMAD4	SMAD4_c.1082G>A	p.R361H	18	48591919	G	A	TRUE	TRUE	BRDN0000553190	0	0	0	0	7	0	0	0	0	0	0	0	0	0	0	0	0	0	0	0	0	0	0	0	1	0	0	8
SMARCA4	SMARCA4_c.1142G>A	p.R381Q	19	11100016	G	A	FALSE	FALSE	template_unavailable	0	0	0	0	2	0	0	0	0	0	0	0	0	0	0	0	0	0	0	0	0	0	0	0	0	0	1	3
SMARCA4	SMARCA4_c.2300C>T	p.S767F	19	11123650	C	T	FALSE	FALSE	template_unavailable	0	0	0	0	0	0	0	0	1	0	0	0	0	0	0	0	0	0	0	0	0	0	0	0	0	0	0	1
SMARCA4	SMARCA4_c.2729C>T	p.T910M	19	11132513	C	T	FALSE	FALSE	template_unavailable	0	0	0	0	0	0	0	0	1	0	0	0	0	0	0	0	2	0	0	0	0	0	0	0	1	0	0	4
SMARCA4	SMARCA4_c.3528C>G	p.S1176R	19	11141551	C	G	FALSE	FALSE	template_unavailable	0	0	0	0	0	0	0	0	0	0	0	0	1	0	0	0	0	0	0	0	0	0	0	0	0	0	0	1
SMARCA4	SMARCA4_c.3574C>T	p.R1192C	19	11143993	C	T	FALSE	FALSE	template_unavailable	0	0	0	0	0	0	0	0	0	0	0	0	0	1	0	0	1	0	0	0	0	0	0	0	0	0	0	2
SMARCA4	SMARCA4_c.3575G>A	p.R1192H	19	11143994	G	A	FALSE	FALSE	template_unavailable	0	0	0	0	0	0	0	0	1	0	0	0	0	0	0	0	0	0	0	0	0	0	0	0	0	0	1	2
SMARCA4	SMARCA4_c.3694G>A	p.G1232S	19	11144113	G	A	FALSE	FALSE	template_unavailable	0	0	0	0	0	0	0	0	0	0	0	0	0	0	1	0	0	0	0	0	0	0	0	0	1	0	1	3
SMARCA4	SMARCA4_c.3694G>T	p.G1232C	19	11144113	G	T	FALSE	FALSE	template_unavailable	0	0	0	0	0	0	0	0	0	0	0	1	0	0	0	0	0	0	0	0	0	0	0	0	0	0	0	1
SMARCB1	SMARCB1_c.464G>A	p.R155H	22	24143232	G	A	TRUE	FALSE	failed_QC	0	0	0	0	0	0	0	0	0	0	0	0	0	0	0	0	0	0	0	0	0	0	0	0	1	0	1	2
SMARCB1	SMARCB1_c.775G>A	p.D259N	22	24159103	G	A	TRUE	FALSE	failed_QC	0	1	0	0	0	0	0	0	0	0	0	0	0	0	0	0	0	0	0	0	0	0	0	0	0	0	0	1
SMC3	SMC3_c.1709C>T	p.T570M	10	112350787	C	T	FALSE	FALSE	template_unavailable	0	0	0	0	0	0	0	0	0	0	0	0	0	0	0	0	0	0	0	0	0	0	0	0	0	0	1	1
SMC3	SMC3_c.2283G>T	p.Q761H	10	112359426	G	T	FALSE	FALSE	template_unavailable	0	0	0	0	0	0	0	0	0	0	0	0	0	1	0	0	0	0	0	0	0	0	0	0	0	0	0	1
SMC3	SMC3_c.2626A>C	p.T876P	10	112360870	A	C	FALSE	FALSE	template_unavailable	0	0	0	0	0	0	0	0	0	0	0	0	0	0	1	0	0	0	0	0	0	0	0	0	0	0	0	1
SMC3	SMC3_c.290C>T	p.S97L	10	112337612	C	T	FALSE	FALSE	template_unavailable	0	0	0	0	0	0	0	0	0	0	0	0	0	0	0	1	0	0	0	0	0	0	0	0	0	0	0	1
SMR3A	SMR3A_c.130C>T	p.P44S	4	71232436	C	T	TRUE	FALSE	failed_QC	0	0	0	0	0	0	0	0	0	0	0	0	0	0	0	0	0	0	1	0	0	0	0	0	0	0	0	1
SNURF	SNURF_c.3G>A	p.M1I	15	25200198	G	A	TRUE	TRUE	BRDN0000553356	0	0	0	0	0	0	0	0	0	0	0	0	0	0	0	0	0	0	1	0	0	0	0	0	0	0	0	1
SOS1	SOS1_c.1655G>T	p.R552M	2	39249914	C	A	FALSE	FALSE	template_unavailable	0	0	0	0	0	0	0	0	0	0	0	0	0	0	0	0	0	0	0	0	0	0	0	0	0	0	1	1
SOS1	SOS1_c.2539G>A	p.E847K	2	39234306	C	T	FALSE	FALSE	template_unavailable	0	0	0	0	0	0	0	0	0	0	0	0	0	0	1	0	0	0	0	0	0	0	0	0	0	0	0	1
SOS1	SOS1_c.265G>A	p.D89N	2	39285894	C	T	FALSE	FALSE	template_unavailable	0	0	0	0	0	0	0	0	0	0	0	0	0	0	1	0	0	0	0	0	0	0	0	0	0	0	0	1
SOS1	SOS1_c.268G>A	p.A90T	2	39285891	C	T	FALSE	FALSE	template_unavailable	0	0	0	0	0	0	0	0	0	0	0	0	0	0	0	1	0	0	0	0	0	0	0	0	0	0	0	1
SOS1	SOS1_c.697A>T	p.N233Y	2	39281778	T	A	FALSE	FALSE	template_unavailable	0	0	0	0	0	0	0	0	0	0	0	0	0	0	2	0	0	0	0	0	0	0	0	0	0	0	4	6
SOS1	SOS1_c.913C>T	p.P305S	2	39262593	G	A	FALSE	FALSE	template_unavailable	0	0	0	0	0	0	0	0	0	0	0	0	0	0	0	0	0	0	1	0	0	0	0	0	0	0	0	1
SOX9	SOX9_c.1442C>G	p.A481G	17	70120440	C	G	FALSE	FALSE	template_unavailable	0	0	0	0	0	0	0	0	0	0	0	0	0	0	1	0	0	0	0	0	0	0	0	0	0	0	0	1
SOX9	SOX9_c.223G>A	p.E75K	17	70117755	G	A	FALSE	FALSE	template_unavailable	0	0	0	0	0	0	0	0	0	0	0	0	0	0	2	0	0	0	0	0	0	0	0	0	0	0	0	2
SPAG8	SPAG8_c.1031C>T	p.P344L	9	35810888	G	A	TRUE	TRUE	BRDN0000553114	0	0	0	0	0	0	0	0	0	0	0	0	0	0	0	0	0	0	0	0	0	0	0	0	1	0	0	1
SPANXN2	SPANXN2_c.241G>A	p.V81I	23	142795437	C	T	FALSE	FALSE	template_unavailable	0	0	0	0	0	0	0	0	0	1	0	0	0	1	0	0	0	0	0	0	0	0	0	0	0	0	0	2
SPANXN2	SPANXN2_c.337G>A	p.E113K	23	142795341	C	T	FALSE	FALSE	template_unavailable	0	0	0	0	0	0	0	0	0	0	0	0	0	0	0	0	0	0	3	0	0	0	0	0	0	0	0	3
SPANXN2	SPANXN2_c.424G>T	p.D142Y	23	142795254	C	A	FALSE	FALSE	template_unavailable	0	0	0	0	0	0	0	0	0	0	0	0	0	0	1	0	0	0	0	0	0	0	0	0	0	0	0	1
SPANXN4	SPANXN4_c.11C>A	p.P4Q	23	142113811	C	A	TRUE	TRUE	BRDN0000552353	0	0	0	0	0	0	0	0	0	0	0	0	0	0	1	0	0	0	0	0	0	0	0	0	0	0	0	1
SPATA8	SPATA8_c.52G>A	p.E18K	15	97326937	G	A	TRUE	TRUE	BRDN0000552272	0	0	0	0	0	0	0	0	0	0	1	0	0	0	0	0	0	0	6	0	0	0	0	0	0	0	0	7
SPATA8	SPATA8_c.247C>A	p.P83T	15	97328276	C	A	TRUE	TRUE	BRDN0000552351	0	0	0	0	0	0	0	0	0	0	0	0	0	0	1	0	0	0	0	0	0	0	0	0	0	0	0	1
SPOP	SPOP_c.148G>A	p.E50K	17	47699360	C	T	TRUE	TRUE	BRDN0000553421	0	0	0	0	0	0	0	0	0	0	0	0	0	0	0	0	0	0	0	0	0	0	0	0	0	0	3	3
SPOP	SPOP_c.391T>G	p.W131G	17	47696432	A	C	TRUE	TRUE	BRDN0000553433	0	0	0	0	0	0	0	0	0	0	0	0	0	0	0	0	0	0	0	0	0	0	2	0	0	0	0	2
SPOP	SPOP_c.305T>G	p.F102C	17	47696643	A	C	TRUE	TRUE	BRDN0000553561	0	0	0	0	0	0	0	0	0	0	0	0	0	0	0	0	0	0	0	0	0	0	1	0	0	0	0	1
SPOP	SPOP_c.398T>C	p.F133S	17	47696425	A	G	TRUE	TRUE	BRDN0000553581	0	0	0	0	0	0	0	0	0	0	0	0	0	0	0	0	0	0	0	0	0	0	2	0	0	0	0	2
SPOP	SPOP_c.302A>T	p.K101I	17	47696646	T	A	TRUE	TRUE	BRDN0000553637	0	0	0	0	0	0	0	0	0	0	0	0	0	1	0	0	0	0	0	0	0	0	0	0	0	0	0	1
SPOP	SPOP_c.393G>T	p.W131C	17	47696430	C	A	TRUE	TRUE	BRDN0000553660	0	0	0	0	0	0	0	0	0	0	0	0	0	0	0	0	0	0	0	0	0	0	0	0	0	0	1	1
SPOP	SPOP_c.140A>C	p.E47A	17	47699368	T	G	TRUE	TRUE	BRDN0000554164	0	0	0	0	0	0	0	0	0	0	0	0	0	0	0	0	0	0	0	0	0	0	0	0	0	0	1	1
SPOP	SPOP_c.402G>C	p.K134N	17	47696421	C	G	TRUE	TRUE	BRDN0000554168	0	0	0	0	0	0	0	0	0	0	0	0	0	0	0	0	0	0	0	0	0	0	1	0	0	0	0	1
SPTA1	SPTA1_c.1403G>A	p.R468H	1	158641934	C	T	FALSE	FALSE	template_unavailable	0	0	0	0	0	0	0	0	0	1	0	0	0	0	0	1	0	0	0	0	0	0	0	0	0	0	0	2
SPTA1	SPTA1_c.1733T>C	p.L578P	1	158639298	A	G	FALSE	FALSE	template_unavailable	0	0	0	0	1	0	0	0	0	0	0	0	0	0	0	0	0	0	0	0	0	0	0	0	0	0	0	1
SPTA1	SPTA1_c.2898G>T	p.Q966H	1	158626354	C	A	FALSE	FALSE	template_unavailable	0	0	0	0	0	0	0	0	0	0	0	0	0	0	1	0	0	0	0	0	0	0	0	0	0	0	0	1
SPTA1	SPTA1_c.3668G>A	p.R1223Q	1	158618345	C	T	FALSE	FALSE	template_unavailable	0	0	0	0	0	0	0	0	0	0	0	1	0	0	0	0	0	0	1	0	0	1	0	0	0	0	0	3
SPTA1	SPTA1_c.3833C>A	p.T1278K	1	158617392	G	T	FALSE	FALSE	template_unavailable	0	0	0	0	0	0	0	0	0	0	0	0	0	0	1	0	0	0	0	0	0	0	0	0	0	0	0	1
SPTA1	SPTA1_c.6710G>C	p.G2237A	1	158585084	C	G	FALSE	FALSE	template_unavailable	0	0	0	0	0	0	0	0	0	0	0	0	0	0	0	0	0	0	0	0	0	0	0	0	1	0	0	1
SPTA1	SPTA1_c.6877C>G	p.H2293D	1	158583623	G	C	FALSE	FALSE	template_unavailable	0	0	0	0	0	0	0	0	0	0	1	0	0	0	0	0	0	0	0	0	0	0	0	0	0	0	0	1
SPTA1	SPTA1_c.730G>A	p.A244T	1	158648273	C	T	FALSE	FALSE	template_unavailable	0	0	1	0	0	0	0	0	0	0	0	0	0	0	0	0	0	0	0	0	0	0	0	0	0	0	0	1
SPTLC3	SPTLC3_c.1037C>T	p.P346L	20	13098257	C	T	FALSE	FALSE	template_unavailable	0	0	0	0	0	0	0	0	0	0	0	0	0	0	0	0	0	1	0	0	0	0	0	0	0	0	0	1
SPTLC3	SPTLC3_c.290G>A	p.R97Q	20	13029765	G	A	FALSE	FALSE	template_unavailable	0	0	0	0	0	0	0	0	0	0	0	0	0	0	0	0	0	0	8	0	0	0	0	0	0	0	0	8
SPTLC3	SPTLC3_c.93G>T	p.K31N	20	12990008	G	T	FALSE	FALSE	template_unavailable	0	0	0	0	0	0	0	0	0	0	0	0	0	0	0	0	0	0	0	0	0	0	0	0	0	0	1	1
ST6GAL2	ST6GAL2_c.1037C>T	p.S346L	2	107450509	G	A	FALSE	FALSE	template_unavailable	0	0	0	0	1	0	0	0	0	0	0	0	0	1	0	0	0	0	1	0	0	0	0	0	0	0	0	3
ST6GAL2	ST6GAL2_c.1092C>A	p.D364E	2	107449072	G	T	FALSE	FALSE	template_unavailable	0	0	0	0	0	0	0	0	0	0	0	0	0	0	1	0	0	0	0	0	0	0	0	0	0	0	0	1
ST6GAL2	ST6GAL2_c.1363G>A	p.E455K	2	107423361	C	T	FALSE	FALSE	template_unavailable	0	0	0	0	0	0	0	0	0	0	0	0	0	0	0	1	0	0	2	0	0	0	0	0	0	0	0	3
ST6GAL2	ST6GAL2_c.1481G>A	p.R494H	2	107423243	C	T	FALSE	FALSE	template_unavailable	0	0	0	0	1	0	0	0	0	0	0	0	0	0	0	0	0	0	0	0	0	0	0	0	0	0	0	1
ST6GAL2	ST6GAL2_c.263C>T	p.S88F	2	107460171	G	A	FALSE	FALSE	template_unavailable	0	0	0	0	0	0	0	0	0	0	0	0	0	0	0	0	0	0	1	0	0	0	0	0	0	0	0	1
ST6GAL2	ST6GAL2_c.52G>T	p.A18S	2	107460382	C	A	FALSE	FALSE	template_unavailable	0	0	0	0	0	0	0	0	0	0	0	0	0	0	1	0	0	0	0	0	0	0	0	0	0	0	0	1
ST6GAL2	ST6GAL2_c.715C>T	p.R239C	2	107459719	G	A	FALSE	FALSE	template_unavailable	0	0	1	0	0	0	0	0	0	0	0	0	0	0	0	0	0	0	0	0	0	0	0	0	0	0	0	1
ST6GAL2	ST6GAL2_c.937G>A	p.E313K	2	107459497	C	T	FALSE	FALSE	template_unavailable	0	0	0	0	0	0	0	0	0	0	0	0	0	0	0	0	0	0	4	0	0	0	0	0	0	0	0	4
STAG1	STAG1_c.1999G>C	p.D667H	3	136141290	C	G	FALSE	FALSE	template_unavailable	0	0	0	0	0	0	0	0	0	0	0	0	0	0	1	0	0	0	0	0	0	0	0	0	0	0	0	1
STAG1	STAG1_c.2873G>A	p.R958H	3	136078053	C	T	FALSE	FALSE	template_unavailable	0	0	0	0	0	0	0	0	0	0	0	0	0	0	0	0	0	0	0	0	0	0	0	0	0	0	1	1
STAG1	STAG1_c.3311C>G	p.T1104S	3	136062809	G	C	FALSE	FALSE	template_unavailable	0	0	0	0	0	0	0	0	0	0	0	0	0	0	1	0	0	0	0	0	0	0	0	0	0	0	0	1
STAG1	STAG1_c.3341C>T	p.A1114V	3	136062779	G	A	FALSE	FALSE	template_unavailable	0	0	0	0	0	0	0	0	0	0	0	0	0	0	1	0	0	0	0	0	0	0	0	0	0	0	0	1
STAG1	STAG1_c.346G>A	p.A116T	3	136287655	C	T	FALSE	FALSE	template_unavailable	0	0	0	0	1	0	0	0	0	0	0	0	0	0	1	0	0	0	0	0	0	0	0	0	0	0	1	3
STAG1	STAG1_c.661A>G	p.T221A	3	136240070	T	C	FALSE	FALSE	template_unavailable	0	0	0	0	0	0	0	0	0	0	0	0	0	0	1	0	0	0	0	0	0	0	0	0	0	0	0	1
STAG2	STAG2_c.1622G>A	p.R541K	23	123195708	G	A	TRUE	TRUE	BRDN0000553818	0	0	0	0	0	0	0	0	0	0	0	0	0	0	1	0	0	0	0	0	0	0	0	0	0	0	0	1
STAG2	STAG2_c.755G>A	p.R252Q	23	123181291	G	A	TRUE	TRUE	BRDN0000553841	0	0	0	0	0	0	0	0	1	0	0	0	0	0	0	0	0	0	1	0	0	0	0	0	0	0	0	2
STAG2	STAG2_c.2990T>G	p.L997W	23	123217336	T	G	TRUE	TRUE	BRDN0000553919	0	0	0	0	0	0	0	1	0	0	0	0	0	0	0	0	0	0	0	0	0	0	0	0	0	0	0	1
STAG2	STAG2_c.1714C>T	p.P572S	23	123196827	C	T	TRUE	TRUE	BRDN0000553982	0	0	0	0	0	0	0	0	0	0	0	0	0	0	0	1	0	0	0	0	0	0	0	0	0	0	0	1
STAG2	STAG2_c.402A>C	p.E134D	23	123176435	A	C	TRUE	TRUE	BRDN0000554174	0	0	0	0	1	0	0	0	0	0	0	0	0	0	0	0	0	0	0	0	0	0	0	0	0	0	0	1
STAG2	STAG2_c.457G>A	p.D153N	23	123176490	G	A	TRUE	FALSE	failed_QC	0	0	0	0	0	0	0	0	0	0	0	0	0	0	0	0	0	0	0	0	0	0	0	0	0	0	1	1
STAG2	STAG2_c.541G>T	p.V181L	23	123179092	G	T	TRUE	FALSE	failed_QC	0	0	0	0	0	0	0	0	0	0	0	0	0	0	1	0	0	0	0	0	0	0	0	0	0	0	0	1
STAT6	STAT6_c.136G>A	p.D46N	12	57501507	C	T	TRUE	TRUE	BRDN0000553341	0	0	0	0	0	0	0	0	0	0	0	0	0	0	0	0	0	0	0	0	1	0	0	0	0	0	0	1
STAT6	STAT6_c.1249A>T	p.N417Y	12	57496668	T	A	TRUE	TRUE	BRDN0000553843	0	0	0	0	0	0	0	1	0	0	0	0	0	0	0	0	0	0	0	0	0	0	0	0	0	0	0	1
STK11	STK11_c.580G>T	p.D194Y	19	1220487	G	T	TRUE	TRUE	BRDN0000552819	0	0	0	0	0	0	0	0	0	0	0	0	0	0	1	0	0	0	0	0	0	0	0	0	0	0	0	1
STK11	STK11_c.527A>C	p.D176A	19	1220434	A	C	TRUE	FALSE	failed_QC	0	0	0	0	0	0	0	0	0	0	0	0	0	0	1	0	0	0	0	0	0	0	0	0	0	0	0	1
STK11	STK11_c.662C>T	p.P221L	19	1220644	C	T	TRUE	FALSE	failed_QC	0	0	0	0	0	0	0	0	0	0	0	0	0	0	1	0	0	0	0	0	0	0	0	0	0	0	0	1
STK19	STK19_c.262G>A	p.E88K	6	31940120	G	A	TRUE	TRUE	BRDN0000553320	0	0	0	0	0	0	0	0	0	0	0	0	0	0	0	0	0	0	1	0	0	0	0	0	0	0	0	1
SV2C	SV2C_c.436G>A	p.G146S	5	75428011	G	A	TRUE	TRUE	BRDN0000553326	0	0	0	0	0	0	0	0	0	0	0	0	0	0	0	0	0	0	0	0	0	0	0	0	0	0	1	1
SV2C	SV2C_c.2181G>T	p.M727I	5	75621369	G	T	TRUE	TRUE	BRDN0000553349	0	0	0	0	0	0	0	0	0	0	0	0	0	0	1	0	0	0	0	0	0	0	0	0	0	0	0	1
SV2C	SV2C_c.1888G>A	p.G630S	5	75597258	G	A	TRUE	TRUE	BRDN0000553427	0	0	0	0	0	0	0	0	0	0	0	0	0	0	0	0	0	0	1	0	0	0	0	0	0	0	0	1
SV2C	SV2C_c.362G>A	p.R121Q	5	75427937	G	A	TRUE	TRUE	BRDN0000553449	0	0	0	0	0	0	0	0	0	0	1	0	0	0	0	0	0	0	0	0	0	0	0	0	0	0	0	1
SV2C	SV2C_c.1007C>A	p.A336D	5	75581080	C	A	TRUE	FALSE	failed_QC	0	0	0	0	0	0	0	0	0	0	0	0	0	0	1	0	0	0	0	0	0	0	0	0	0	0	0	1
SYCP1	SYCP1_c.2317G>A	p.E773K	1	115489936	G	A	TRUE	TRUE	BRDN0000553330	0	0	0	0	0	0	0	0	0	0	0	0	0	0	0	0	0	0	1	0	0	0	0	0	0	0	0	1
SYCP1	SYCP1_c.2665G>A	p.D889N	1	115527451	G	A	TRUE	TRUE	BRDN0000553431	0	0	0	0	0	0	0	0	0	0	0	0	0	0	0	0	0	0	1	0	0	0	0	0	0	0	0	1
SYCP1	SYCP1_c.1324G>A	p.E442K	1	115453021	G	A	TRUE	TRUE	BRDN0000553750	0	0	0	0	0	0	0	0	0	0	0	0	0	0	0	0	0	0	1	0	0	0	0	0	0	0	0	1
SYCP1	SYCP1_c.1525G>A	p.E509K	1	115454199	G	A	TRUE	TRUE	BRDN0000560889	0	0	0	0	0	0	0	0	0	0	0	0	0	0	0	0	0	0	2	0	0	0	0	0	0	0	0	2
SYCP1	SYCP1_c.1965G>T	p.Q655H	1	115486998	G	T	TRUE	FALSE	failed_QC	0	0	0	0	1	0	0	0	0	0	0	0	0	0	0	0	0	0	0	0	0	0	0	0	0	0	0	1
SYCP1	SYCP1_c.2098G>A	p.D700N	1	115487547	G	A	TRUE	FALSE	failed_QC	0	0	0	0	0	0	0	0	0	0	0	0	0	0	0	0	0	0	1	0	0	0	0	0	0	0	0	1
SYCP2	SYCP2_c.1904C>T	p.S635L	20	58467646	G	A	FALSE	FALSE	template_unavailable	0	0	1	0	0	0	0	0	0	0	0	0	0	0	0	0	0	0	1	0	0	0	0	0	0	0	2	4
SYCP2	SYCP2_c.2236T>C	p.S746P	20	58467173	A	G	FALSE	FALSE	template_unavailable	0	0	0	0	0	0	0	0	0	0	0	0	0	0	0	0	0	0	0	0	0	0	0	0	1	0	0	1
SYCP2	SYCP2_c.2535A>C	p.K845N	20	58457215	T	G	FALSE	FALSE	template_unavailable	0	0	0	0	0	0	0	0	1	0	0	0	0	0	0	0	0	0	0	0	0	0	0	0	0	0	0	1
SYCP2	SYCP2_c.4276G>C	p.E1426Q	20	58441392	C	G	FALSE	FALSE	template_unavailable	0	0	0	0	0	0	0	0	0	0	1	0	0	0	0	0	0	0	0	0	0	0	0	0	0	0	0	1
SYCP2	SYCP2_c.4540C>T	p.R1514C	20	58439419	G	A	FALSE	FALSE	template_unavailable	0	1	0	0	0	0	0	0	0	0	0	0	0	0	0	0	0	0	0	0	0	0	0	0	0	0	0	1
SYCP2	SYCP2_c.584A>C	p.E195A	20	58490535	T	G	FALSE	FALSE	template_unavailable	0	0	0	0	0	0	0	0	0	0	0	0	0	0	0	0	0	0	1	0	0	0	0	0	0	0	0	1
SYN1	SYN1_c.390C>A	p.F130L	23	47466585	G	T	FALSE	FALSE	template_unavailable	0	0	0	0	0	0	0	0	0	0	0	0	0	0	0	0	0	0	0	0	0	0	0	0	0	0	1	1
SYN1	SYN1_c.981G>A	p.M327I	23	47435805	C	T	FALSE	FALSE	template_unavailable	0	0	0	0	0	0	0	0	0	0	0	0	0	0	1	0	0	0	0	0	0	0	0	0	0	0	0	1
TATDN2	TATDN2_c.2102G>T	p.R701I	3	10320103	G	T	FALSE	FALSE	template_unavailable	0	0	0	0	0	0	0	0	0	0	0	0	0	0	0	0	0	0	0	0	0	0	0	0	0	0	1	1
TATDN2	TATDN2_c.962A>G	p.E321G	3	10311828	A	G	FALSE	FALSE	template_unavailable	0	0	0	0	0	0	0	0	0	0	0	0	0	0	0	0	0	0	1	0	0	0	0	0	0	0	0	1
TBL1XR1	TBL1XR1_c.241C>G	p.L81V	3	176769478	G	C	TRUE	TRUE	BRDN0000552988	0	0	0	0	0	0	0	0	0	0	0	0	0	0	0	0	0	0	0	0	0	0	0	0	0	0	0	1
TBL1XR1	TBL1XR1_c.497G>A	p.R166Q	3	176768329	C	T	TRUE	TRUE	BRDN0000553057	0	0	0	0	0	0	0	0	0	0	0	0	0	0	0	0	0	0	0	0	0	0	0	0	0	0	1	1
TBL1XR1	TBL1XR1_c.1046C>T	p.T349M	3	176756102	G	A	TRUE	TRUE	BRDN0000560766	0	0	0	0	0	0	0	1	0	0	0	0	0	0	0	0	0	0	0	0	0	0	0	0	0	0	1	2
TBX3	TBX3_c.1390C>A	p.P464T	12	115112350	G	T	FALSE	FALSE	template_unavailable	0	0	0	0	0	0	0	0	0	0	0	0	0	0	0	1	0	0	0	0	0	0	0	0	0	0	0	1
TBX3	TBX3_c.317A>T	p.H106L	12	115120689	T	A	FALSE	FALSE	template_unavailable	0	0	0	0	0	0	0	0	0	0	0	0	0	0	1	0	0	0	0	0	0	0	0	0	0	0	0	1
TBX3	TBX3_c.752G>A	p.R251Q	12	115117422	C	T	FALSE	FALSE	template_unavailable	0	0	0	0	0	0	0	0	0	0	0	0	0	0	0	0	0	0	0	0	0	0	0	0	1	0	0	1
TCF7L2	TCF7L2_c.1190C>T	p.A397V	10	114912120	C	T	TRUE	FALSE	failed_QC	0	0	0	0	1	0	0	0	0	1	0	0	0	0	0	0	0	0	0	0	0	0	0	0	0	0	0	2
TCF7L2	TCF7L2_c.667G>A	p.D223N	10	114901057	G	A	TRUE	FALSE	failed_QC	0	0	0	0	0	0	0	0	0	0	0	0	0	0	0	0	0	0	0	0	0	0	0	0	0	0	1	1
TCF7L2	TCF7L2_c.1759G>T	p.A587S	10	114925681	G	T	FALSE	FALSE	template_unavailable	0	0	0	0	0	0	0	0	0	0	0	0	0	0	1	0	0	0	0	0	0	0	0	0	0	0	0	1
THEMIS	THEMIS_c.587G>T	p.R196I	6	128150743	C	A	TRUE	TRUE	BRDN0000553199	0	0	0	0	0	0	0	0	0	0	0	0	0	0	0	0	0	0	0	0	0	0	0	0	0	0	1	1
THEMIS	THEMIS_c.1507G>A	p.E503K	6	128134279	C	T	TRUE	TRUE	BRDN0000553265	0	0	0	0	0	0	0	0	0	0	0	0	0	0	0	0	0	0	2	0	0	0	0	0	0	0	0	2
THEMIS	THEMIS_c.646C>T	p.P216S	6	128150684	G	A	TRUE	TRUE	BRDN0000553277	0	0	0	0	0	0	0	0	0	0	0	0	0	0	0	0	0	0	2	0	0	0	0	0	0	0	0	2
THEMIS	THEMIS_c.718G>A	p.D240N	6	128135068	C	T	TRUE	TRUE	BRDN0000553758	0	0	0	0	0	0	0	0	0	0	0	0	0	0	0	0	0	0	1	0	0	0	0	0	0	0	0	1
THEMIS	THEMIS_c.1098C>G	p.H366Q	6	128134688	G	C	TRUE	TRUE	BRDN0000553768	0	0	0	0	0	0	0	0	0	0	0	0	0	0	1	0	0	0	0	0	0	0	0	0	0	0	0	1
THEMIS	THEMIS_c.760G>T	p.D254Y	6	128135026	C	A	TRUE	FALSE	failed_QC	0	0	0	0	0	0	0	0	0	0	0	0	0	0	0	0	0	0	0	0	0	0	0	0	0	0	1	1
TIAL1	TIAL1_c.212G>T	p.R71I	10	121341987	C	A	FALSE	FALSE	template_unavailable	0	0	0	0	0	0	0	0	0	0	0	0	0	0	0	0	0	0	0	0	0	0	0	0	0	0	1	1
TMEM167A	TMEM167A_c.121G>A	p.G41S	5	82357723	C	T	FALSE	FALSE	template_unavailable	0	0	0	0	0	0	0	0	0	0	1	0	0	0	0	0	0	0	0	0	0	0	0	0	0	0	0	1
TMEM61	TMEM61_c.424G>A	p.E142K	1	55457567	G	A	FALSE	FALSE	template_unavailable	0	1	0	0	0	0	0	0	0	0	0	0	0	0	0	0	0	0	0	0	0	0	0	0	0	0	0	1
TMPO	TMPO_c.553G>C	p.D185H	12	98925604	G	C	TRUE	TRUE	BRDN0000554030	0	1	0	0	0	0	0	0	0	0	0	0	0	0	0	0	0	0	0	0	0	0	0	0	0	0	0	1
TNF	TNF_c.471C>G	p.S157R	6	31545083	C	G	TRUE	TRUE	BRDN0000552571	0	0	0	0	0	0	0	0	0	0	0	0	0	0	0	0	0	0	1	0	0	0	0	0	0	0	0	1
TNFRSF14	TNFRSF14_c.304G>C	p.A102P	1	2489907	G	C	TRUE	TRUE	BRDN0000552505	0	0	0	0	0	0	0	1	0	0	0	0	0	0	0	0	0	0	0	0	0	0	0	0	0	0	0	1
TNPO1	TNPO1_c.1049C>T	p.S350L	5	72178958	C	T	FALSE	FALSE	template_unavailable	0	0	0	0	0	0	0	0	0	0	0	0	0	0	0	0	0	0	0	0	0	0	0	0	0	0	1	1
TNPO1	TNPO1_c.2329G>A	p.E777K	5	72192969	G	A	FALSE	FALSE	template_unavailable	0	0	0	0	0	0	0	0	0	0	0	0	0	0	0	0	0	0	1	0	0	0	0	0	0	0	0	1
TP53	TP53_c.527G>T	p.C176F	17	7578403	C	A	TRUE	TRUE	BRDN0000552500	0	1	3	0	1	0	0	1	2	0	0	0	0	0	2	1	0	0	0	0	1	0	0	0	1	0	0	13
TP53	TP53_c.824G>C	p.C275S	17	7577114	C	G	TRUE	TRUE	BRDN0000552662	0	0	0	0	0	0	0	0	0	0	0	0	0	0	0	0	0	1	1	0	0	0	0	0	0	0	0	2
TP53	TP53_c.824G>T	p.C275F	17	7577114	C	A	TRUE	TRUE	BRDN0000552716	0	0	0	0	0	0	0	0	1	0	2	0	0	1	2	0	0	0	0	0	0	0	0	0	0	0	0	6
TP53	TP53_c.644G>T	p.S215I	17	7578205	C	A	TRUE	TRUE	BRDN0000552747	0	0	1	0	0	0	0	0	0	0	0	0	0	0	1	0	0	0	0	0	0	0	0	0	0	0	0	2
TP53	TP53_c.583A>T	p.I195F	17	7578266	T	A	TRUE	TRUE	BRDN0000552794	0	0	0	0	0	0	0	0	1	0	1	0	0	0	0	0	0	0	0	0	1	0	0	0	0	0	0	3
TP53	TP53_c.737T>G	p.M246R	17	7577544	A	C	TRUE	TRUE	BRDN0000552814	0	0	0	0	0	0	0	0	0	1	0	0	0	0	0	0	0	0	0	0	0	0	0	0	0	0	0	1
TP53	TP53_c.555C>A	p.S185R	17	7578375	G	T	TRUE	FALSE	failed_QC	0	0	0	0	0	0	0	0	0	0	0	1	0	0	0	0	0	0	0	0	0	0	0	0	0	0	0	1
TP53	TP53_c.738G>A	p.M246I	17	7577543	C	T	TRUE	FALSE	failed_QC	0	0	1	0	0	0	0	0	0	0	0	0	0	0	0	0	0	0	0	0	0	0	0	0	0	0	0	1
TPTE	TPTE_c.1003G>A	p.A335T	21	10933876	C	T	TRUE	FALSE	failed_QC	0	0	0	0	0	0	0	0	0	1	0	0	0	0	0	0	0	0	0	0	0	0	0	0	0	0	0	1
TPTE	TPTE_c.1145T>G	p.F382C	21	10920109	A	C	TRUE	FALSE	failed_QC	0	0	0	0	1	0	0	0	0	0	0	0	0	0	0	0	0	0	0	0	0	0	0	0	0	0	0	1
TPTE	TPTE_c.1268C>T	p.S423L	21	10916378	G	A	TRUE	FALSE	failed_QC	0	0	0	0	2	0	0	0	0	0	0	0	0	0	0	0	0	0	1	0	0	0	0	0	0	0	2	5
TPTE	TPTE_c.1571G>A	p.R524Q	21	10906990	C	T	TRUE	FALSE	failed_QC	0	0	0	0	0	0	0	0	0	0	0	0	0	0	0	0	0	0	1	0	0	0	0	0	0	0	0	1
TPTE	TPTE_c.340A>G	p.I114V	21	10951372	T	C	TRUE	FALSE	failed_QC	0	0	1	0	0	0	0	0	0	0	0	0	0	0	0	0	0	0	0	0	0	0	0	0	0	0	0	1
TPTE	TPTE_c.372G>T	p.L124F	21	10951340	C	A	TRUE	FALSE	failed_QC	0	0	0	0	0	0	0	0	0	0	0	0	0	0	1	0	0	0	0	0	0	0	0	0	0	0	0	1
TPTE	TPTE_c.593G>A	p.R198Q	21	10942994	C	T	TRUE	FALSE	failed_QC	0	0	0	0	0	0	0	0	0	0	0	0	0	0	0	0	0	0	0	0	0	0	0	0	0	0	1	1
TPTE	TPTE_c.833A>G	p.H278R	21	10934960	T	C	TRUE	FALSE	failed_QC	0	0	0	0	0	0	0	0	0	0	0	0	0	0	0	0	0	0	1	0	0	0	0	0	0	0	0	1
TRAF3	TRAF3_c.1387G>A	p.D463N	14	103371801	G	A	TRUE	TRUE	BRDN0000553022	0	0	0	0	0	0	0	0	0	0	0	0	0	0	0	0	0	0	0	0	0	0	0	0	0	0	1	1
TRAF3	TRAF3_c.935A>G	p.N312S	14	103363713	A	G	TRUE	TRUE	BRDN0000553797	0	0	1	0	0	0	0	0	0	0	0	0	0	0	0	0	0	0	0	0	0	0	0	0	0	0	0	1
TRAT1	TRAT1_c.226G>A	p.E76K	3	108568024	G	A	TRUE	TRUE	BRDN0000560814	0	0	0	0	0	0	0	0	0	0	0	0	0	0	0	0	0	0	4	0	0	0	0	0	0	0	0	4
TRAT1	TRAT1_c.118G>T	p.D40Y	3	108549627	G	T	TRUE	TRUE	BRDN0000560816	0	0	0	0	0	0	0	0	0	1	0	0	0	0	0	0	0	0	0	0	0	0	0	0	0	0	0	1
TRIM55	TRIM55_c.1106A>G	p.E369G	8	67064732	A	G	TRUE	TRUE	BRDN0000553030	0	0	0	0	0	0	0	0	0	0	0	0	0	0	0	0	0	0	1	0	0	0	0	0	0	0	0	1
TRIM55	TRIM55_c.965G>A	p.R322H	8	67062681	G	A	TRUE	TRUE	BRDN0000554089	0	0	0	0	0	0	0	0	0	0	0	0	0	0	0	0	0	0	1	0	0	0	0	0	0	0	0	1
TRIM55	TRIM55_c.771C>A	p.N257K	8	67062047	C	A	TRUE	FALSE	failed_QC	0	0	0	0	0	0	0	0	0	0	0	0	0	0	1	0	0	0	0	0	0	0	0	0	0	0	0	1
TRIM55	TRIM55_c.1438C>T	p.R480W	8	67066483	C	T	FALSE	FALSE	template_unavailable	0	0	0	0	1	0	0	0	0	0	0	0	0	0	0	0	0	0	0	0	0	0	0	0	0	0	0	1
TRIM58	TRIM58_c.1082G>A	p.G361E	1	248039412	G	A	FALSE	FALSE	template_unavailable	0	0	1	0	0	0	0	0	0	0	0	0	0	0	0	0	0	0	0	0	0	0	0	0	0	0	0	1
TRIM58	TRIM58_c.1239T>G	p.I413M	1	248039569	T	G	FALSE	FALSE	template_unavailable	0	0	1	0	0	0	0	0	0	0	0	0	0	0	0	0	0	0	0	0	0	0	0	0	0	0	0	1
TRIM58	TRIM58_c.1258G>C	p.G420R	1	248039588	G	C	FALSE	FALSE	template_unavailable	0	0	0	0	0	0	0	0	0	0	0	0	0	0	1	0	0	0	0	0	0	0	0	0	0	0	0	1
TRIM58	TRIM58_c.617C>A	p.A206E	1	248028107	C	A	FALSE	FALSE	template_unavailable	0	0	0	0	0	0	0	0	0	0	0	0	0	0	1	0	0	0	0	0	0	0	0	0	0	0	0	1
TRIM58	TRIM58_c.813G>A	p.M271I	1	248031307	G	A	FALSE	FALSE	template_unavailable	0	0	0	0	0	0	0	0	0	0	0	0	0	0	0	0	0	0	2	0	0	0	0	0	0	0	0	2
TRIM58	TRIM58_c.899C>T	p.A300V	1	248039229	C	T	FALSE	FALSE	template_unavailable	0	0	0	0	0	0	0	0	0	1	0	0	0	0	1	0	0	0	0	0	0	0	0	0	0	0	0	2
TRIM7	TRIM7_c.1010A>G	p.E337G	5	180625197	T	C	FALSE	FALSE	template_unavailable	0	0	0	0	0	0	0	0	0	0	0	0	0	0	0	0	0	0	0	0	0	0	0	0	0	0	1	1
TTN	TTN_c.13182A>C	p.E4394D	2	179613945	T	G	FALSE	FALSE	template_unavailable	0	0	0	0	0	0	0	0	0	0	0	0	0	0	0	0	0	0	1	0	0	0	0	0	0	0	0	1
TTN	TTN_c.13939G>A	p.G4647R	2	179595721	C	T	FALSE	FALSE	template_unavailable	0	0	0	0	0	0	0	0	0	0	0	0	0	0	0	0	0	0	1	0	0	0	0	0	0	0	0	1
TTN	TTN_c.16898T>C	p.I5633T	2	179590301	A	G	FALSE	FALSE	template_unavailable	0	0	0	0	0	0	0	0	0	0	0	0	0	0	0	1	0	0	0	0	0	0	0	0	0	0	0	1
TTN	TTN_c.201C>G	p.I67M	2	179666959	G	C	FALSE	FALSE	template_unavailable	0	0	0	0	0	0	0	0	0	0	0	0	0	0	0	1	0	0	0	0	0	0	0	0	0	0	0	1
TTN	TTN_c.21334C>T	p.R7112C	2	179582535	G	A	FALSE	FALSE	template_unavailable	0	0	0	0	0	0	0	0	0	0	0	0	0	0	0	0	0	0	0	0	0	0	0	0	1	0	0	1
TTN	TTN_c.3029G>A	p.S1010N	2	179647604	C	T	FALSE	FALSE	template_unavailable	0	0	0	0	0	0	0	0	0	0	0	0	0	0	0	0	0	0	3	0	0	0	0	0	0	0	0	3
TTN	TTN_c.36385G>A	p.E12129K	2	179495596	C	T	FALSE	FALSE	template_unavailable	0	0	0	0	0	0	0	0	0	0	0	0	0	0	0	0	0	0	5	0	0	0	0	0	0	0	0	5
TTN	TTN_c.6950G>T	p.R2317L	2	179639041	C	A	FALSE	FALSE	template_unavailable	0	0	0	0	0	0	0	0	0	0	1	0	0	0	0	0	0	0	0	0	0	0	0	0	0	0	0	1
TUBB	TUBB_c.1076G>C	p.R359P	6	30691915	G	C	TRUE	TRUE	BRDN0000554033	0	0	0	0	0	0	0	0	0	0	0	0	0	0	1	0	0	0	0	0	0	0	0	0	0	0	0	1
U2AF1	U2AF1_c.101C>T	p.S34F	21	44524456	G	A	TRUE	TRUE	BRDN0000552503	2	1	0	0	0	0	0	0	0	0	0	0	0	0	11	0	0	0	0	0	0	1	0	0	0	0	2	17
U2AF1	U2AF1_c.649G>A	p.G217S	21	44513286	C	T	TRUE	FALSE	failed_QC	0	0	0	0	0	0	0	0	0	0	0	0	0	1	0	0	0	0	0	0	0	0	0	0	0	0	0	1
UNC5D	UNC5D_c.1997G>T	p.C666F	8	35608161	G	T	FALSE	FALSE	template_unavailable	0	0	0	0	0	0	0	0	0	0	0	0	0	0	0	1	0	0	0	0	0	0	0	0	0	0	0	1
UNC5D	UNC5D_c.224G>C	p.C75S	8	35406930	G	C	FALSE	FALSE	template_unavailable	0	0	0	0	1	0	0	0	0	0	0	0	0	0	0	0	0	0	0	0	0	0	0	0	0	0	0	1
UNC5D	UNC5D_c.2566T>C	p.S856P	8	35631904	T	C	FALSE	FALSE	template_unavailable	0	0	0	0	0	0	0	0	0	0	0	0	0	0	0	0	0	0	0	0	0	0	0	0	0	0	1	1
UNC5D	UNC5D_c.2681A>T	p.Q894L	8	35647900	A	T	FALSE	FALSE	template_unavailable	0	0	0	0	0	0	0	1	0	0	0	0	0	0	0	0	0	0	0	0	0	0	0	0	0	0	0	1
UNC5D	UNC5D_c.2733T>A	p.H911Q	8	35647952	T	A	FALSE	FALSE	template_unavailable	0	0	0	0	0	0	0	0	0	0	1	0	0	0	0	0	0	0	0	0	0	0	0	0	0	0	0	1
UNC5D	UNC5D_c.2828C>A	p.A943D	8	35648047	C	A	FALSE	FALSE	template_unavailable	0	0	0	0	0	0	0	0	0	0	0	0	0	0	0	1	0	0	0	0	0	0	0	0	0	0	0	1
UNC5D	UNC5D_c.671C>T	p.S224L	8	35541165	C	T	FALSE	FALSE	template_unavailable	0	0	0	0	1	0	0	0	0	0	0	0	0	0	0	0	0	0	0	0	0	0	0	0	0	0	0	1
UNC5D	UNC5D_c.983G>A	p.R328Q	8	35544126	G	A	FALSE	FALSE	template_unavailable	0	0	1	0	0	0	0	0	0	0	0	0	0	0	0	0	0	0	0	0	0	0	0	0	0	0	1	2
UNC93B1	UNC93B1_c.1057G>A	p.E353K	11	67764105	C	T	TRUE	FALSE	failed_QC	0	0	0	0	0	0	0	0	0	0	0	0	0	0	0	0	0	0	0	0	0	0	0	0	0	0	2	2
USP20	USP20_c.163G>A	p.E55K	9	132620356	G	A	FALSE	FALSE	template_unavailable	0	0	0	0	0	0	0	0	0	0	0	0	0	0	1	0	0	0	0	0	0	0	0	0	0	0	0	1
USP20	USP20_c.1769G>T	p.R590L	9	132636883	G	T	FALSE	FALSE	template_unavailable	0	0	0	0	0	0	0	0	0	0	0	1	0	0	0	0	0	0	0	0	0	0	0	0	0	0	0	1
VHL	VHL_c.472C>G	p.L158V	3	10191479	C	G	TRUE	TRUE	BRDN0000553381	0	0	0	0	0	0	0	0	0	0	0	2	0	0	0	0	0	0	0	0	0	0	0	0	0	0	0	2
VHL	VHL_c.332G>A	p.S111N	3	10183863	G	A	TRUE	TRUE	BRDN0000553400	0	0	0	0	0	0	0	0	0	0	0	1	0	0	0	0	0	0	0	0	0	0	0	0	0	0	0	1
VHL	VHL_c.388G>T	p.V130F	3	10188245	G	T	TRUE	TRUE	BRDN0000553413	0	0	0	0	0	0	0	0	0	0	0	2	0	0	0	0	0	0	0	0	0	0	0	0	0	0	0	2
VHL	VHL_c.343C>T	p.H115Y	3	10188200	C	T	TRUE	TRUE	BRDN0000553425	0	0	0	0	0	0	0	0	0	0	0	1	0	0	0	0	0	0	0	0	0	0	0	0	0	0	0	1
VHL	VHL_c.556G>A	p.E186K	3	10191563	G	A	TRUE	TRUE	BRDN0000553437	0	0	0	0	1	0	0	0	0	0	0	0	0	0	0	0	0	0	0	0	0	0	0	0	0	0	0	1
VHL	VHL_c.482G>C	p.R161P	3	10191489	G	C	TRUE	TRUE	BRDN0000553480	0	0	0	0	0	0	0	0	0	0	0	1	0	0	0	0	0	0	0	0	0	0	0	0	0	0	0	1
VHL	VHL_c.343C>A	p.H115N	3	10188200	C	A	TRUE	FALSE	failed_QC	0	0	0	0	0	0	0	0	0	0	0	2	0	0	0	0	0	0	0	0	0	0	0	0	0	0	0	2
VPS13C	VPS13C_c.10385G>T	p.G3462V	15	62167104	C	A	FALSE	FALSE	template_unavailable	0	0	0	0	0	0	0	0	0	0	1	0	0	0	0	0	0	0	0	0	0	0	0	0	0	0	0	1
VPS13C	VPS13C_c.1070A>G	p.Y357C	15	62300902	T	C	FALSE	FALSE	template_unavailable	0	0	0	0	0	0	0	0	0	0	0	0	0	0	1	0	0	0	0	0	0	0	0	0	0	0	0	1
VPS13C	VPS13C_c.3298G>A	p.E1100K	15	62256067	C	T	FALSE	FALSE	template_unavailable	0	0	0	0	1	0	0	0	0	0	0	0	0	0	0	0	0	0	1	0	0	0	0	0	0	0	2	4
VPS13C	VPS13C_c.3929T>C	p.I1310T	15	62251774	A	G	FALSE	FALSE	template_unavailable	0	0	0	0	0	0	0	0	0	0	0	0	0	0	0	0	0	0	0	0	0	0	0	0	1	0	0	1
VPS13C	VPS13C_c.4546G>T	p.D1516Y	15	62242607	C	A	FALSE	FALSE	template_unavailable	0	0	0	0	0	0	0	0	0	0	1	0	0	0	0	0	0	0	0	0	0	0	0	0	0	0	0	1
VPS13C	VPS13C_c.6392C>T	p.S2131L	15	62219414	G	A	FALSE	FALSE	template_unavailable	0	0	0	0	0	0	0	0	0	0	0	0	0	0	0	0	0	0	1	0	0	0	0	0	0	0	0	1
VPS13C	VPS13C_c.6712C>A	p.L2238I	15	62214859	G	T	FALSE	FALSE	template_unavailable	0	0	0	0	0	0	0	0	0	1	0	0	0	0	0	0	0	0	0	0	0	0	0	0	0	0	0	1
VPS13C	VPS13C_c.6881G>A	p.R2294Q	15	62214690	C	T	FALSE	FALSE	template_unavailable	0	0	0	0	1	0	0	0	0	0	0	0	0	0	0	0	0	0	0	0	0	0	0	0	0	0	0	1
WBSCR17	WBSCR17_c.1193C>T	p.A398V	7	71130508	C	T	TRUE	TRUE	BRDN0000553195	0	0	0	0	1	0	0	0	0	0	0	0	0	0	0	0	0	0	0	0	0	0	0	0	0	0	0	1
WBSCR17	WBSCR17_c.582C>A	p.S194R	7	70853380	C	A	TRUE	TRUE	BRDN0000553270	0	0	0	0	0	0	0	0	0	0	0	0	0	0	1	0	0	0	0	0	0	0	0	0	0	0	0	1
WBSCR17	WBSCR17_c.865G>A	p.E289K	7	70885994	G	A	TRUE	TRUE	BRDN0000553713	0	0	0	0	0	0	0	0	0	0	0	0	0	0	0	0	0	0	4	0	0	0	0	0	0	0	0	4
WBSCR17	WBSCR17_c.1042G>A	p.D348N	7	71036349	G	A	TRUE	TRUE	BRDN0000553734	0	0	0	0	0	0	0	0	0	0	0	0	0	0	0	0	0	0	2	0	0	0	0	0	0	0	0	2
WBSCR17	WBSCR17_c.1519G>A	p.E507K	7	71175764	G	A	TRUE	TRUE	BRDN0000554040	0	0	0	0	0	0	0	0	0	0	0	0	0	0	0	0	0	0	1	0	0	0	0	0	0	0	0	1
WBSCR17	WBSCR17_c.404C>T	p.P135L	7	70800701	C	T	TRUE	FALSE	failed_QC	0	0	0	0	0	0	0	0	0	0	0	0	0	0	1	0	0	0	0	0	0	0	0	0	0	0	0	1
WBSCR17	WBSCR17_c.682C>T	p.R228C	7	70880967	C	T	TRUE	FALSE	failed_QC	0	0	0	0	2	0	0	0	0	0	0	0	0	0	0	0	0	0	0	0	0	0	0	0	0	0	0	2
WBSCR17	WBSCR17_c.930G>T	p.W310C	7	70886059	G	T	TRUE	FALSE	failed_QC	0	0	0	0	0	0	0	0	0	0	0	1	0	0	0	0	0	0	0	0	0	0	0	0	0	0	0	1
WDR17	WDR17_c.1070C>T	p.A357V	4	177052789	C	T	FALSE	FALSE	template_unavailable	0	0	0	0	0	0	0	0	0	0	0	0	0	1	0	0	0	0	0	0	0	0	0	0	0	0	0	1
WDR17	WDR17_c.1298C>T	p.P433L	4	177056386	C	T	FALSE	FALSE	template_unavailable	0	0	0	0	0	0	0	0	0	0	1	0	0	0	0	0	0	0	0	0	0	0	0	0	0	0	0	1
WDR17	WDR17_c.170C>T	p.A57V	4	177032829	C	T	FALSE	FALSE	template_unavailable	0	0	0	0	1	0	0	0	0	0	0	0	0	0	0	0	0	0	0	0	0	0	0	0	0	0	0	1
WDR17	WDR17_c.1960G>T	p.D654Y	4	177069477	G	T	FALSE	FALSE	template_unavailable	0	0	0	0	0	0	0	0	0	0	0	0	0	0	1	0	0	0	0	0	0	0	0	0	0	0	0	1
WDR17	WDR17_c.2535G>T	p.W845C	4	177077232	G	T	FALSE	FALSE	template_unavailable	0	0	1	0	0	0	0	0	0	0	0	0	0	0	0	0	0	0	0	0	0	0	0	0	0	0	0	1
WDR17	WDR17_c.3677A>T	p.D1226V	4	177098633	A	T	FALSE	FALSE	template_unavailable	0	0	0	0	0	0	0	0	0	0	0	0	0	0	0	1	0	0	0	0	0	0	0	0	0	0	0	1
WDR17	WDR17_c.421G>T	p.V141L	4	177041059	G	T	FALSE	FALSE	template_unavailable	0	0	0	0	0	0	0	0	0	0	1	0	0	0	0	0	0	0	0	0	0	0	0	0	0	0	0	1
WDR24	WDR24_c.538G>A	p.A180T	16	737683	C	T	FALSE	FALSE	template_unavailable	0	0	0	0	0	0	0	0	0	1	0	0	0	0	0	0	0	0	0	0	0	0	0	0	0	0	0	1
WIPI1	WIPI1_c.415C>T	p.P139S	17	66440649	G	A	TRUE	TRUE	BRDN0000560847	0	0	0	0	0	0	0	0	0	0	0	0	0	0	0	0	0	0	1	0	0	0	0	0	0	0	0	1
WISP2	WISP2_c.689G>T	p.R230L	20	43355884	G	T	TRUE	TRUE	BRDN0000552362	0	0	0	0	0	0	0	0	0	0	0	0	0	0	0	0	0	0	0	0	0	0	0	0	0	0	1	1
WNK3	WNK3_c.710C>T	p.T237M	23	54337552	G	A	TRUE	TRUE	BRDN0000553636	0	0	1	0	0	0	0	0	0	0	0	0	0	0	0	0	0	0	0	0	0	0	0	0	0	0	0	1
WNK3	WNK3_c.1850C>T	p.S617F	23	54319604	G	A	TRUE	TRUE	BRDN0000553847	0	0	0	0	0	0	0	0	0	0	0	0	0	1	0	0	0	0	0	0	0	0	0	0	0	0	0	1
WNK3	WNK3_c.1610A>G	p.E537G	23	54321069	T	C	TRUE	TRUE	BRDN0000553915	0	0	0	0	0	0	0	0	0	0	0	1	0	0	0	0	0	0	0	0	0	0	0	0	0	0	0	1
WNK3	WNK3_c.1249G>C	p.E417Q	23	54324757	C	G	TRUE	TRUE	BRDN0000553947	0	0	0	0	0	0	0	0	0	0	0	0	0	0	0	0	0	0	0	0	0	0	0	0	1	0	0	1
WNK3	WNK3_c.1463T>C	p.V488A	23	54321216	A	G	TRUE	TRUE	BRDN0000553969	0	0	0	0	0	0	0	0	0	0	0	0	0	0	0	1	0	0	0	0	0	0	0	0	0	0	0	1
WNK3	WNK3_c.108A>C	p.E36D	23	54359999	T	G	TRUE	FALSE	failed_QC	0	0	0	0	0	0	0	0	1	0	0	0	0	0	0	0	0	0	0	0	0	0	0	0	0	0	0	1
WNK3	WNK3_c.1184C>T	p.S395F	23	54324822	G	A	TRUE	FALSE	failed_QC	0	0	0	0	1	0	0	0	0	0	0	0	0	0	0	0	0	0	0	0	0	0	0	0	0	0	0	1
WNK3	WNK3_c.610C>A	p.P204T	23	54337652	G	T	TRUE	FALSE	failed_QC	0	0	0	0	0	0	0	0	0	0	0	0	0	0	1	0	0	0	0	0	0	0	0	0	0	0	0	1
WNT2	WNT2_c.1000G>A	p.V334M	7	116918292	C	T	TRUE	TRUE	BRDN0000552734	0	0	0	0	0	0	0	0	0	1	0	0	0	0	0	0	0	0	0	0	0	0	0	0	0	0	0	1
WNT2	WNT2_c.511T>C	p.F171L	7	116955202	A	G	TRUE	FALSE	failed_QC	0	0	0	0	0	0	0	0	0	0	0	0	0	0	0	0	0	0	0	0	0	0	0	0	0	0	1	1
XIRP2	XIRP2_c.2209G>A	p.E737K	2	168100111	G	A	FALSE	FALSE	template_unavailable	0	0	0	0	0	0	0	0	0	1	0	1	0	0	0	0	0	0	2	0	0	0	0	0	0	0	1	5
XIRP2	XIRP2_c.2491G>A	p.E831K	2	168100393	G	A	FALSE	FALSE	template_unavailable	0	0	0	0	0	0	0	0	0	0	0	0	0	0	0	0	0	0	5	0	0	0	0	0	0	0	0	5
XIRP2	XIRP2_c.3026T>G	p.I1009S	2	168100928	T	G	FALSE	FALSE	template_unavailable	0	0	0	0	0	0	0	0	0	0	0	0	0	0	0	0	0	0	0	0	0	0	0	0	0	0	1	1
XIRP2	XIRP2_c.314G>A	p.R105H	2	167760306	G	A	FALSE	FALSE	template_unavailable	0	0	1	0	0	0	0	0	0	0	0	0	0	0	0	0	0	0	0	0	0	0	0	0	0	0	0	1
XIRP2	XIRP2_c.3332C>T	p.S1111L	2	168101234	C	T	FALSE	FALSE	template_unavailable	0	0	0	0	0	0	0	1	0	0	0	0	0	0	0	0	0	0	4	0	0	0	0	0	0	0	0	5
XIRP2	XIRP2_c.3481G>A	p.D1161N	2	168101383	G	A	FALSE	FALSE	template_unavailable	0	0	0	0	0	0	0	0	0	0	0	0	0	0	0	0	0	0	1	0	0	0	0	0	0	0	0	1
XIRP2	XIRP2_c.5640T>A	p.H1880Q	2	168103542	T	A	FALSE	FALSE	template_unavailable	0	0	0	0	0	0	0	0	0	0	0	0	1	0	0	0	0	0	0	0	0	0	0	0	0	0	0	1
XIRP2	XIRP2_c.9779A>G	p.E3260G	2	168107681	A	G	FALSE	FALSE	template_unavailable	0	0	0	0	0	0	0	0	0	0	0	0	0	0	0	0	0	0	0	0	1	0	0	0	0	0	0	1
XPO1	XPO1_c.1711G>A	p.E571K	2	61719472	C	T	TRUE	TRUE	BRDN0000553761	0	0	1	3	1	0	0	1	0	0	0	0	0	0	0	0	0	0	0	0	0	0	1	0	0	0	2	9
XPO1	XPO1_c.1657C>T	p.R553C	2	61719526	G	A	TRUE	TRUE	BRDN0000553762	0	0	0	0	0	0	0	0	0	0	0	0	0	0	0	0	0	0	0	0	0	0	0	0	0	0	1	1
XPO1	XPO1_c.1712A>C	p.E571A	2	61719471	T	G	TRUE	TRUE	BRDN0000553985	0	0	0	1	0	0	0	0	0	0	0	0	0	0	0	0	0	0	0	0	0	0	0	0	0	0	0	1
YTHDC1	YTHDC1_c.1447G>C	p.E483Q	4	69188621	C	G	TRUE	TRUE	BRDN0000553669	0	0	0	0	0	0	0	0	0	0	0	0	0	0	0	0	0	0	1	0	0	0	0	0	0	0	0	1
YTHDC1	YTHDC1_c.800G>A	p.R267Q	4	69202828	C	T	TRUE	TRUE	BRDN0000553820	0	0	0	0	2	0	0	0	0	0	0	0	0	0	0	0	0	0	0	0	0	0	0	0	0	0	0	2
YTHDC1	YTHDC1_c.2084G>A	p.R695Q	4	69179917	C	T	TRUE	FALSE	failed_QC	0	0	0	0	0	0	0	0	0	0	0	0	0	0	0	0	0	0	0	0	0	0	0	0	1	0	1	2
YTHDC1	YTHDC1_c.900A>C	p.E300D	4	69199099	T	G	TRUE	FALSE	failed_QC	0	0	0	0	0	0	0	0	0	0	0	0	0	0	0	0	0	0	0	0	0	0	0	0	0	0	1	1
ZC3H13	ZC3H13_c.1529G>A	p.R510H	13	46559623	C	T	FALSE	FALSE	template_unavailable	0	0	0	0	0	0	0	0	1	0	0	0	0	0	0	0	0	0	0	0	0	0	0	0	0	0	0	1
ZC3H13	ZC3H13_c.1619G>A	p.R540H	13	46559533	C	T	FALSE	FALSE	template_unavailable	0	0	0	0	0	0	0	0	0	0	0	0	0	0	0	0	0	0	0	0	0	0	0	0	1	0	0	1
ZC3H13	ZC3H13_c.292A>G	p.T98A	13	46616346	T	C	FALSE	FALSE	template_unavailable	0	0	0	0	0	0	0	0	0	0	0	0	0	0	0	0	0	0	0	0	0	0	0	0	1	0	0	1
ZC3H13	ZC3H13_c.308G>A	p.R103Q	13	46616330	C	T	FALSE	FALSE	template_unavailable	0	0	0	0	2	0	0	0	0	0	0	0	0	0	0	0	0	0	0	0	0	0	0	0	0	0	0	2
ZC3H13	ZC3H13_c.3782G>A	p.R1261Q	13	46542897	C	T	FALSE	FALSE	template_unavailable	0	0	0	0	0	0	0	0	0	0	0	0	0	0	0	0	0	0	0	0	0	0	0	0	1	0	1	2
ZC3H13	ZC3H13_c.44C>T	p.T15I	13	46619599	G	A	FALSE	FALSE	template_unavailable	0	0	0	0	0	0	0	0	0	1	0	0	0	0	0	0	0	0	0	0	0	0	0	0	0	0	0	1
ZDHHC4	ZDHHC4_c.521G>A	p.R174H	7	6624671	G	A	TRUE	TRUE	BRDN0000552743	0	0	1	0	0	0	0	0	0	0	0	0	0	0	0	0	0	0	0	0	0	0	0	0	0	0	0	1
ZFP42	ZFP42_c.125C>A	p.P42H	4	188924086	C	A	FALSE	FALSE	template_unavailable	0	0	0	0	0	0	0	0	0	0	0	0	0	0	1	0	0	0	0	0	0	0	0	0	0	0	1	2
ZFP42	ZFP42_c.415A>T	p.N139Y	4	188924376	A	T	FALSE	FALSE	template_unavailable	0	0	0	0	0	0	0	0	0	0	0	0	0	0	0	0	0	0	1	0	0	0	0	0	0	0	0	1
ZFP42	ZFP42_c.633T>G	p.I211M	4	188924594	T	G	FALSE	FALSE	template_unavailable	0	0	0	0	0	0	0	0	0	1	0	0	0	0	0	0	0	0	0	0	0	0	0	0	0	0	0	1
ZFP42	ZFP42_c.641C>T	p.P214L	4	188924602	C	T	FALSE	FALSE	template_unavailable	0	0	0	0	0	0	0	0	0	0	0	0	0	0	0	0	0	0	1	0	0	0	0	0	0	0	0	1
ZFP42	ZFP42_c.791C>T	p.T264M	4	188924752	C	T	FALSE	FALSE	template_unavailable	0	0	0	0	0	0	0	0	0	2	0	0	0	0	0	0	0	0	0	0	0	0	0	0	0	0	0	2
ZIC4	ZIC4_c.320T>C	p.L107P	3	147114007	A	G	FALSE	FALSE	template_unavailable	0	0	0	0	0	0	0	0	0	0	0	0	0	0	0	1	0	0	0	0	0	0	0	0	0	0	0	1
ZIC4	ZIC4_c.50G>A	p.R17Q	3	147120535	C	T	FALSE	FALSE	template_unavailable	0	0	0	0	0	0	0	0	0	0	0	0	0	0	0	0	0	0	2	0	0	0	0	0	0	0	1	3
ZIC4	ZIC4_c.723C>G	p.C241W	3	147108999	G	C	FALSE	FALSE	template_unavailable	0	0	0	0	0	0	0	0	0	0	1	0	0	0	0	0	0	0	0	0	0	0	0	0	0	0	0	1
ZIC4	ZIC4_c.768C>A	p.H256Q	3	147108954	G	T	FALSE	FALSE	template_unavailable	0	0	0	0	0	0	0	0	0	0	0	0	0	0	0	0	0	0	0	0	0	0	0	0	0	0	1	1
ZIC4	ZIC4_c.869G>T	p.R290L	3	147108853	C	A	FALSE	FALSE	template_unavailable	0	0	0	0	0	0	0	0	0	0	0	0	0	0	1	0	0	0	0	0	0	0	0	0	0	0	0	1
ZMYM1	ZMYM1_c.1351G>T	p.G451C	1	35578782	G	T	TRUE	FALSE	failed_QC	0	0	0	0	0	0	0	0	0	1	0	0	0	0	0	0	0	0	0	0	0	0	0	0	0	0	0	1
ZMYM1	ZMYM1_c.1798G>A	p.E600K	1	35579229	G	A	TRUE	FALSE	failed_QC	0	0	0	0	0	0	0	0	0	0	0	0	0	0	0	1	0	0	0	0	0	0	0	0	0	0	0	1
ZMYM1	ZMYM1_c.3263C>A	p.S1088Y	1	35580694	C	A	FALSE	FALSE	template_unavailable	0	1	0	0	0	0	0	0	0	0	0	0	0	0	0	0	0	0	0	0	0	0	0	0	0	0	0	1
ZNF292	ZNF292_c.1243C>G	p.Q415E	6	87964590	C	G	FALSE	FALSE	template_unavailable	0	0	0	0	0	0	0	0	0	0	0	0	0	0	0	0	0	0	0	0	0	0	0	0	1	0	0	1
ZNF292	ZNF292_c.1289G>A	p.C430Y	6	87964636	G	A	FALSE	FALSE	template_unavailable	0	0	0	0	0	0	0	0	0	0	1	0	0	0	0	0	0	0	0	0	0	0	0	0	0	0	0	1
ZNF292	ZNF292_c.2495G>A	p.S832N	6	87965842	G	A	FALSE	FALSE	template_unavailable	0	0	0	0	0	0	0	0	0	0	0	0	0	0	0	0	0	0	0	0	0	0	0	0	0	0	1	1
ZNF292	ZNF292_c.4519G>A	p.E1507K	6	87967866	G	A	FALSE	FALSE	template_unavailable	0	0	0	0	1	0	0	0	0	0	0	0	0	0	0	0	0	0	0	0	0	0	0	0	0	0	2	3
ZNF292	ZNF292_c.6382C>G	p.Q2128E	6	87969729	C	G	FALSE	FALSE	template_unavailable	0	0	0	0	0	0	0	0	0	0	0	0	0	0	1	0	0	0	0	0	0	0	0	0	0	0	0	1
ZNF292	ZNF292_c.6511G>C	p.E2171Q	6	87969858	G	C	FALSE	FALSE	template_unavailable	0	1	0	0	0	0	0	0	0	0	0	0	0	0	0	0	0	0	0	0	0	0	0	0	0	0	0	1
ZNF292	ZNF292_c.6725G>A	p.G2242E	6	87970072	G	A	FALSE	FALSE	template_unavailable	0	0	0	0	0	0	0	0	0	0	0	0	0	0	1	0	0	0	0	0	0	0	0	0	0	0	0	1
ZNF292	ZNF292_c.8032A>G	p.T2678A	6	87971379	A	G	FALSE	FALSE	template_unavailable	0	1	0	0	0	0	0	0	0	0	0	0	0	0	0	0	0	0	0	0	0	0	0	0	0	0	0	1
ZNF433	ZNF433_c.873C>G	p.F291L	19	12126809	G	C	FALSE	FALSE	template_unavailable	0	0	0	0	0	0	0	0	0	0	1	0	0	0	0	0	0	0	0	0	0	0	0	0	0	0	0	1
ZNF451	ZNF451_c.1043A>T	p.E348V	6	57011926	A	T	TRUE	FALSE	failed_QC	0	0	0	0	0	0	0	0	0	0	0	0	0	0	0	0	0	0	0	0	0	0	0	0	1	0	0	1
ZNF451	ZNF451_c.1546C>T	p.H516Y	6	57012429	C	T	TRUE	FALSE	failed_QC	0	0	0	0	0	0	0	0	0	0	0	0	0	0	0	0	0	0	0	0	0	0	0	0	1	0	0	1
ZNF451	ZNF451_c.2067C>A	p.H689Q	6	57012950	C	A	TRUE	FALSE	failed_QC	0	0	0	0	0	0	0	0	0	0	0	1	0	0	0	0	0	0	0	0	0	0	0	0	0	0	0	1
ZNF451	ZNF451_c.2648G>T	p.R883L	6	57015556	G	T	TRUE	FALSE	failed_QC	0	0	0	0	0	0	0	0	0	0	1	0	0	0	0	0	0	0	0	0	0	0	0	0	0	0	0	1
ZNF451	ZNF451_c.367G>A	p.G123R	6	56993581	G	A	TRUE	FALSE	failed_QC	0	0	0	0	0	0	0	0	0	0	0	0	0	0	0	0	0	1	0	0	0	0	0	0	0	0	0	1
ZNF454	ZNF454_c.1384C>T	p.H462Y	5	178392789	C	T	TRUE	TRUE	BRDN0000552995	0	0	0	0	0	0	0	0	0	0	0	0	0	0	0	0	0	0	1	0	0	0	0	0	0	0	0	1
ZNF454	ZNF454_c.1127G>T	p.R376I	5	178392532	G	T	TRUE	TRUE	BRDN0000553025	0	0	0	0	0	0	0	0	0	0	0	0	0	0	0	0	0	0	0	0	0	0	0	0	0	0	3	3
ZNF454	ZNF454_c.896C>T	p.P299L	5	178392301	C	T	TRUE	TRUE	BRDN0000553085	0	0	0	0	0	0	0	0	0	0	0	0	0	0	0	0	0	0	1	0	0	0	0	0	0	0	0	1
ZNF454	ZNF454_c.991A>C	p.N331H	5	178392396	A	C	TRUE	FALSE	failed_QC	0	0	0	0	0	0	0	0	0	0	0	0	0	0	0	1	0	0	0	0	0	0	0	0	0	0	0	1
