# Supplementary material for: Systematic Functional Interrogation of Rare Cancer Variants Identifies Oncogenic Alleles
Source: Oxford University Press journal article supplement (doi:10.1158/2159-8290.cd-16-0160), 2016-05-05
Supplement: 21598290cd160160-sup-162070_1_supp_3443527_q5sqx4.xlsx [file 21598290cd160160-sup-162070_1_supp_3443527_q5sqx4.xlsx]

## Sheet: pre-expansion
Supplementary Table S4A: Composition of Pre-expansion cell culture
Mutation	Pool1	Pool2	Pool3	Pool4	Pool5	Pool6	Pool7	Pool8	Pool9	Pool10	Pool11	Pool12	Pool13	Pool14
A4GALT_p.A272V	0	0	0	0	0.00237915	0	0	0	0	0	0	0	0	0.0248581
ACTG1_p.A22P	0	0	0	0	1.58514	0	0	0	0	0	0	0	1.72426	0
ACTG1_p.K61E	0	0	0	0	0.0611692	0	0	0	0	0	0	0	0.0747653	0
ACVR1B_p.D335N	0	0	0	0.0863691	0	0	0	0	0.106427	0	0	0	0	0
ACVR1B_p.E412D	0	0.928599	0	0	0	0	0	0	0	0	0.885166	0	0	0
ACVR2A_p.A381V	0	0	0	2.32761	0	0	0	0	2.15073	0	0	0	0	0
ADORA2A_p.R220W	0	0	0.107366	0	0	0	0	0	0.148392	0	0	0	0	0
AKT1_p.D44N	0	0.878322	0	0	0	0	0	0	0	0	1.36885	0	0	0
AKT1_p.E17K	1.42543	0	0	0	0	0	0	1.3845	0	0	0	0	0	0
AKT1_p.E267G	0	0.757634	0	0	0	0	0	0	0.959706	0	0	0	0	0
AKT1_p.L52R	0	0.967998	0	0	0	0	0	0	0	0	1.24098	0	0	0
AKT1_p.Q79K	0	0	1.0376	0	0	0	0	0	0	0.981459	0	0	0	0
AKT1_p.R370C	0	3.63572	0	0	0	0	0	0	3.58905	0	0	0	0	0
AKT1_p.V201I	0	0	0	1.36169	0	0	0	0	0	1.38897	0	0	0	0
ARSI_p.P228L	0	0	0	0.146585	0	0	0	0	0	0	0.0835401	0	0	0
ARSI_p.V373M	0	0	0.373157	0	0	0	0	0	0.334159	0	0	0	0	0
ASCL4_p.T114M	0	0	0	0	3.19294	0	0	0	0	0	0	0	2.88109	0
B2M_p.A6V	0	0	0	1.4236	0	0	0	0	0	0	1.19402	0	0	0
B2M_p.C100S	0	1.75357	0	0	0	0	0	0	2.44736	0	0	0	0	0
B2M_p.D54N	0	0	0	1.27064	0	0	0	0	1.61244	0	0	0	0	0
B2M_p.M1I	0	0	1.21785	0	0	0	0	0	0	0	1.22561	0	0	0
B2M_p.M1L	0	0	2.71403	0	0	0	0	0	0	1.93888	0	0	0	0
B2M_p.M1R	0	2.05805	0	0	0	0	0	0	0	0	2.66083	0	0	0
B2M_p.M1V	0	0	1.75429	0	0	0	0	0	1.66121	0	0	0	0	0
B2M_p.Y30H	0	0	2.54145	0	0	0	0	0	0	2.41354	0	0	0	0
BAP1_p.D75G	0	0	0.815693	0	0	0	0	0	0.776612	0	0	0	0	0
BAP1_p.N299S	0	0.30141	0	0	0	0	0	0	0	0.383326	0	0	0	0
BCR_p.A426S	0	0	1.08912	0	0	0	0	0	0.972568	0	0	0	0	0
BFP	2.09154	1.3228	2.25529	1.94048	1.66922	2.50527	2.55232	2.36926	0	6.52444	0	2.16564	5.18445	0
BRAF_p.G466A	1.00617	0	0	0	0	0	0	0.752053	0	0	0	0	0	0
BRAF_p.G466E	1.73753	0	0	0	0	0	0	1.46356	0	0	0	0	0	0
BRAF_p.G466V	1.83606	0	0	0	0	0	0	1.60542	0	0	0	0	0	0
BRAF_p.L597Q	0.388616	0	0	0	0	0	0	0.320114	0	0	0	0	0	0
BRAF_p.N581S	1.14819	0	0	0	0	0	0	0.930575	0	0	0	0	0	0
BRAF_p.V600E	0.207346	0	0	0	0	0	0	0.0933039	0	0	0	0	0	0
BTC_p.P70S	0	0	0	0	1.25506	0	0	0	0	0	0	0	1.81621	0
C15orf23_p.P26L	0	0	0	0	1.9164	0	0	0	0	0	0	0	2.14524	0
C15orf23_p.P26S	0	0	0	0	3.63778	0	0	0	0	0	0	3.45199	0	0
C19orf48_p.L70F	0	0	0	0	1.06129	0	0	0	0	0	0	0.970565	0	0
C1orf150_p.G2E	0	0	0	0	3.30257	0	0	0	0	0	0	0	2.94877	0
C1orf150_p.Y89N	0	0	0	0	0.33571	0	0	0	0	0	0	0	0.746407	0
C20orf72_p.P102S	0	0	0	0	2.17886	0	0	0	0	0	0	0	2.27805	0
CBFB_p.R151H	0	0	0.218549	0	0	0	0	0	0.205792	0	0	0	0	0
CCNG1_p.E167K	0	0	1.2005	0	0	0	0	0	0	1.52372	0	0	0	0
CD3E_p.E189Q	0	0	0	0.0525883	0	0	0	0	0	0.0503618	0	0	0	0
CD70_p.D165Y	0	0	0	0	0.282054	0	0	0	0	0	0	0	0.384123	0
CD79B_p.H194N	0	0	0.850132	0	0	0	0	0	0	0.673229	0	0	0	0
CDK17_p.M85I	0	0	0	0	1.85937	0	0	0	0	0	0	1.92387	0	0
CDK17_p.R177H	0	0	0	0	1.79601	0	0	0	0	0	0	0	1.96652	0
CDK4_p.A23S	0	0	1.24176	0	0	0	0	0	0	0	1.25204	0	0	0
CDKN1B_p.C29F	0	0	0	0.548161	0	0	0	0	0.604816	0	0	0	0	0
CHD2_p.E287Q	0	0	3.69551	0	0	0	0	0	0	0	2.50104	0	0	0
CHD2_p.E412K	0	1.12082	0	0	0	0	0	0	0	0	1.51264	0	0	0
CHD2_p.P195L	0	0	1.85603	0	0	0	0	0	0	1.66398	0	0	0	0
CHD2_p.P474R	0	2.75989	0	0	0	0	0	0	3.13979	0	0	0	0	0
CHSY3_p.I628M	0	0	0	0	0.479085	0	0	0	0	0	0	0.628967	0	0
CHSY3_p.R350H	0	0	0	0	0.740416	0	0	0	0	0	0	0.794224	0	0
CNBD1_p.A426S	0	0	0	0	0.714496	0	0	0	0	0	0	0	1.2434	0
CNBD1_p.F343C	0	0	0	0	2.27409	0	0	0	0	0	0	2.88849	0	0
CNBD1_p.L396P	0	0	0	0	2.36613	0	0	0	0	0	0	0	3.2498	0
CNBD1_p.L396R	0	0	0	0	3.54424	0	0	0	0	0	0	0	0	3.36813
CNBD1_p.S372N	0	0	0	0	3.3849	0	0	0	0	0	0	3.43435	0	0
CNBD1_p.Y200F	0	0	0	0	2.93981	0	0	0	0	0	0	3.33134	0	0
COPS2_p.A317D	0	0	0	0	1.74498	0	0	0	0	0	0	0	0	1.66521
COPS2_p.G68R	0	0	0	0	1.63854	0	0	0	0	0	0	1.91355	0	0
CPXCR1_p.A56S	0	0	0	0	1.56197	0	0	0	0	0	0	1.611	0	0
CPXCR1_p.E73K	0	0	0	0	0.152391	0	0	0	0	0	0	0	0.17537	0
CPXCR1_p.S102P	0	0	0	0	1.02472	0	0	0	0	0	0	0	0	1.80594
CTCF_p.N568K	0	0.0422222	0	0	0	0	0	0	0	0	0.0527947	0	0	0
CTCF_p.P552S	0	0	0	0	0.177622	0	0	0	0	0	0	0	0	0.976838
CTCF_p.R377C	0	0.613987	0	0	0	0	0	0	0.696716	0	0	0	0	0
CTCF_p.R377H	0	0	0	0.963177	0	0	0	0	0	1.06763	0	0	0	0
CTNNB1_p.D162E	0	0	0.482875	0	0	0	0	0	0	0	0.299544	0	0	0
CTNNB1_p.G34E	0.102668	0	0	0	0	0	0	0.117718	0	0	0	0	0	0
CTNNB1_p.G34R	0.18194	0	0	0	0	0	0	0.20694	0	0	0	0	0	0
CTNNB1_p.G34V	0.0483834	0	0	0	0	0	0	0.0289192	0	0	0	0	0	0
CTNNB1_p.H36Y	0.120415	0	0	0	0	0	0	0.115138	0	0	0	0	0	0
CTNNB1_p.I35S	0.145778	0	0	0	0	0	0	0.160615	0	0	0	0	0	0
CTNNB1_p.R535Q	0	0	0	1.66777	0	0	0	0	0	0	1.29782	0	0	0
CTNNB1_p.T257I	0	0.618056	0	0	0	0	0	0	0.644411	0	0	0	0	0
CYLC2_p.D299Y	0	0	0	0	0.382354	0	0	0	0	0	0	0	0	0.892906
CYLC2_p.E133K	0	0	0	0	0.196781	0	0	0	0	0	0	0.316209	0	0
CYLC2_p.E152K	0	0	0	0	0.266465	0	0	0	0	0	0	0	0.276566	0
CYLC2_p.R71C	0	0	0	0	0.138617	0	0	0	0	0	0	0	0.239118	0
CYLC2_p.V105F	0	0	0	0	0.170109	0	0	0	0	0	0	0	0	0.403873
CYP3A5_p.D336N	0	0	1.41091	0	0	0	0	0	0	0	1.36015	0	0	0
CYP3A5_p.G177R	0	0	0	0	2.20416	0	0	0	0	0	0	0	0	2.47437
DCAF4L2_p.A79V	0	0	0	0	0.757634	0	0	0	0	0	0	0	0	1.36502
DCAF4L2_p.G100V	0	0	0	0	0.756131	0	0	0	0	0	0	0	0	1.75065
DCAF4L2_p.L37H	0	0	0	0	1.07187	0	0	0	0	0	0	0	1.30262	0
DCAF4L2_p.P160L	0	0	0	0	1.26727	0	0	0	0	0	0	0	1.40841	0
DCAF4L2_p.P364L	0	0	0	0	1.07882	0	0	0	0	0	0	0	0	1.31039
DCAF4L2_p.R172C	0	0	0	0	1.9216	0	0	0	0	0	0	0	1.49865	0
DCAF4L2_p.V332L	0	0	0	0	1.00995	0	0	0	0	0	0	1.15799	0	0
DNAJC12_p.R178C	0	2.54247	0	0	0	0	0	0	2.64276	0	0	0	0	0
DNASE2_p.Y182H	0	0	0	0	0.375905	0	0	0	0	0	0	0.51978	0	0
DNMT3A	1.11345	1.36257	1.77805	1.23459	1.3605	2.02774	2.36012	1.14371	5.11867	0	0	6.87261	0	0
DNMT3A_p.A910V	0	0.560348	0	0	0	0	0	0	0.875422	0	0	0	0	0
DNMT3A_p.G746V	0	0	0.984995	0	0	0	0	0	0	0	0.831362	0	0	0
DNMT3A_p.Q485H	0	0	1.81762	0	0	0	0	0	0	0	1.53318	0	0	0
EDNRB_p.F292L	0	0	0	0.145657	0	0	0	0	0.0828211	0	0	0	0	0
EDNRB_p.L349I	0	0	0.0693017	0	0	0	0	0	0.0460005	0	0	0	0	0
eGFP	1.56643	2.63953	2.72301	2.96121	2.28868	2.90376	1.04292	1.52371	0	0	6.5448	0	0	6.80922
EGFR_p.A289V	0.371874	0	0	0	0	0	0	0.320961	0	0	0	0	0	0
EGFR_p.G719D	0.326337	0	0	0	0	0	0	0.362472	0	0	0	0	0	0
EGFR_p.P622S	0	1.27069	0	0	0	0	0	0	0	1.1608	0	0	0	0
EIF1AX_p.G9R	0	0	0	0	0.625215	0	0	0	0	0	0	0	0	0.929484
ELF1_p.P32S	0	0	0	0.375706	0	0	0	0	0.323517	0	0	0	0	0
ELF3_p.A332V	0	0	0	0	2.2205	0	0	0	0	0	0	0	2.62111	0
ERBB2_p.R897Q	0	0	0	0.378006	0	0	0	0	0	0	0.210842	0	0	0
ERBB2_p.T182I	0	0	0	0.217376	0	0	0	0	0	0.231694	0	0	0	0
ERBB2_p.V842I	0.262217	0	0	0	0	0	0	0.354578	0	0	0	0	0	0
ERBB2IP_p.E463K	0	0	0	0	0.624777	0	0	0	0	0	0	0	0	1.30264
ERBB2IP_p.I979M	0	0	0	0	0	0.831064	0	0	0	0	0	0	0.778149	0
EYS_p.C554S	0	0	0	0	0	2.20045	0	0	0	0	0	0	1.29488	0
EYS_p.F336L	0	0	0	0	0	2.59497	0	0	0	0	0	2.10968	0	0
EYS_p.H466N	0	0	0	0	0	1.56829	0	0	0	0	0	0	0	1.65112
EYS_p.N269H	0	0	0	0	0	1.79438	0	0	0	0	0	1.78849	0	0
EYS_p.Q172L	0	0	0	0	0	2.21258	0	0	0	0	0	0	0	2.21634
EYS_p.R26Q	0	0	0	0	0	3.74407	0	0	0	0	0	0	0	4.06264
EYS_p.R587I	0	0	0	0	0	1.9132	0	0	0	0	0	0	1.26766	0
FAM116A_p.R427H	0	0	0	0	0	4.77237	0	0	0	0	0	0	0	3.93542
FAM196A_p.Q46R	0	0	0	0	0	0.434194	0	0	0	0	0	0	0	0.913322
FAM196A_p.R399Q	0	0	0	0	0	0.840787	0	0	0	0	0	0	0.916596	0
FAM200A_p.S481N	0	0	0	0	0	0.951766	0	0	0	0	0	0	0.919154	0
FBXO15_p.E410K	0	0	0.441919	0	0	0	0	0	0	0	0.389087	0	0	0
FBXO15_p.S366G	0	1.53042	0	0	0	0	0	0	1.98599	0	0	0	0	0
FBXO16_p.T50K	0	0	0	0	0	1.12778	0	0	0	0	0	1.288	0	0
FBXW7_p.A502V	0	0	0.56741	0	0	0	0	0	0	0	0.474479	0	0	0
FBXW7_p.I347M	0	0	0.468645	0	0	0	0	0	0.500962	0	0	0	0	0
FBXW7_p.R465C	2.54645	0	0	0	0	0	0	2.35855	0	0	0	0	0	0
FBXW7_p.R465H	0	3.27021	0	0	0	0	0	0	0	0	3.47104	0	0	0
FBXW7_p.R505C	0	3.24439	0	0	0	0	0	0	0	4.56003	0	0	0	0
FBXW7_p.R658Q	0	0	0	0.229282	0	0	0	0	0	0	0.242934	0	0	0
FBXW7_p.R689Q	0	0	0	0.0447586	0	0	0	0	0	0.0595004	0	0	0	0
FBXW7_p.S462Y	0	0	0	0.123338	0	0	0	0	0	0.129133	0	0	0	0
FGF1_p.G44C	0	3.38837	0	0	0	0	0	0	0	0	3.09368	0	0	0
FGFR2_p.G384E	0	0	0	1.29703	0	0	0	0	0	1.05869	0	0	0	0
FGFR2_p.P253L	0	0.458342	0	0	0	0	0	0	0	0	0.631685	0	0	0
FGFR2_p.P253R	0.291431	0	0	0	0	0	0	0.298164	0	0	0	0	0	0
FGFR2_p.R165W	0	0	0	3.53896	0	0	0	0	0	0	3.02714	0	0	0
FGFR2_p.R251Q	0.341698	0	0	0	0	0	0	0.277678	0	0	0	0	0	0
FTH1_p.A161T	0	0	1.18337	0	0	0	0	0	1.2294	0	0	0	0	0
GABRA6_p.A322T	0	0	0	0	0	0.0105072	0	0	0	0	0	0.0138833	0	0
GABRA6_p.G175R	0	0	0	0	0	0.0128073	0	0	0	0	0	0	0	0.0900751
GABRA6_p.G212R	0	0	0	0	0	0.0250919	0	0	0	0	0	0.0210167	0	0
GABRA6_p.P345S	0	0	0	0	0	0.0212758	0	0	0	0	0	0.0375079	0	0
GABRA6_p.R238K	0	0	0	0	0	0.0351286	0	0	0	0	0	0	0.0293814	0
GALNT14_p.A187T	0	0	0	0	0	0.676069	0	0	0	0	0	0	0	1.30595
GALNT14_p.F285L	0	0	0	0	0	0.0686367	0	0	0	0	0	0	0.131298	0
GALNT14_p.P484S	0	0	0	0	0	0.379671	0	0	0	0	0	0	0.274598	0
GALNT14_p.R336Q	0	0	0	0	0	0.0448517	0	0	0	0	0	0	0.034497	0
GALNT14_p.V534F	0	0	0	0	0	0.409363	0	0	0	0	0	0	0.497976	0
GALNTL5_p.D221E	0	0	0	0	0	0.944814	0	0	0	0	0	0	0.983688	0
GALNTL5_p.G309E	0	0	0	0	0	0.562424	0	0	0	0	0	0	0.628619	0
GATA3_p.R330K	0	1.99553	0	0	0	0	0	0	0	0	2.95392	0	0	0
GATA3_p.S118F	0	0	0	0.788502	0	0	0	0	0	0	0.694522	0	0	0
GATA3_p.S140F	0	0.426955	0	0	0	0	0	0	0	0	0.529798	0	0	0
GCET2_p.H177Q	0	0	0	0	0	0.114011	0	0	0	0	0	0.147807	0	0
GEN1_p.L235R	0	0	0	0	0	1.50431	0	0	0	0	0	1.34327	0	0
GNA13_p.L374I	0	0	0	0.15942	0	0	0	0	0	0	0.0907215	0	0	0
GPR141_p.E267K	0	0	0	0	0	0.0924217	0	0	0	0	0	0	0.068666	0
GPR141_p.Q224K	0	0	0	0	0	0.0473086	0	0	0	0	0	0	0	0.178354
GPR141_p.T6N	0	0	0	0	0	0.544494	0	0	0	0	0	0	0	0.905855
GPR156_p.C763S	0	0	0	0	0	1.95999	0	0	0	0	0	0	1.65251	0
GPR156_p.R757L	0	0	0	0	0	2.65587	0	0	0	0	0	0	1.56679	0
GPS2_p.R102Q	0	3.76218	0	0	0	0	0	0	3.33574	0	0	0	0	0
GZMA_p.G210E	0	0	0	0	0	1.66741	0	0	0	0	0	0	0	1.6136
GZMA_p.H38N	0	0	0	0	0	1.43123	0	0	0	0	0	0	1.33869	0
H2AFX_p.K134N	0	0	2.14916	0	0	0	0	0	1.89187	0	0	0	0	0
HAPLN1_p.K115N	0	0	0	0	0	0.198069	0	0	0	0	0	0	0	0.583456
HAPLN1_p.P233H	0	0	0	0	0	0.240046	0	0	0	0	0	0	0	0.690639
HAPLN1_p.S326N	0	0	0	0	0	0.251755	0	0	0	0	0	0	0	0.784589
HAUS1_p.A102V	0	0	0	0	0	3.76195	0	0	0	0	0	3.48497	0	0
HcRed	1.86306	2.0466	2.49957	2.49736	3.55564	3.16947	2.93103	1.771	2.74515	5.34337	0	0	0	8.9664
HERPUD2_p.P46L	0	0	0	0	0	4.379	0	0	0	0	0	4.2973	0	0
HERPUD2_p.R285Q	0	0	0	0	0	1.38011	0	0	0	0	0	0	1.16706	0
HIST1H1E_p.A60D	0	0	0	0	0	2.38953	0	0	0	0	0	2.71123	0	0
HIST1H3B_p.A48S	0	0	2.22097	0	0	0	0	0	2.20535	0	0	0	0	0
HIST1H3B_p.L101W	0	2.22939	0	0	0	0	0	0	0	2.48273	0	0	0	0
HRAS_p.A11D	0	0	0	1.76258	0	0	0	0	0	0	1.35213	0	0	0
HRAS_p.A59T	1.3156	0	0	0	0	0	0	1.49078	0	0	0	0	0	0
HRAS_p.G12A	2.34764	0	0	0	0	0	0	2.16775	0	0	0	0	0	0
HRAS_p.G12C	2.4357	0	0	0	0	0	0	2.88172	0	0	0	0	0	0
HRAS_p.G12D	2.63141	0	0	0	0	0	0	2.89219	0	0	0	0	0	0
HRAS_p.Q61K	1.99665	0	0	0	0	0	0	2.07452	0	0	0	0	0	0
HRAS_p.Q61L	1.89955	0	0	0	0	0	0	2.04391	0	0	0	0	0	0
HRAS_p.Q61R	2.21279	0	0	0	0	0	0	2.63142	0	0	0	0	0	0
HRH4_p.S115L	0	0	0	0	1.73227	0	0	0	0	0	0	2.31943	0	0
HRH4_p.S170L	0	2.04049	0	0	0	0	0	0	2.93349	0	0	0	0	0
HTR3B_p.I118T	0	0	0	0	0	0.0273397	0	0	0	0	0	0	0.0302996	0
HTR3B_p.W95C	0	0	0	0	0	0.0055934	0	0	0	0	0	0.00797714	0	0
HTR4_p.T105M	0	0	0.426724	0	0	0	0	0	0	0.489761	0	0	0	0
HTR4_p.Y129H	0	0	0.132973	0	0	0	0	0	0	0	0.0690651	0	0	0
IDH1_p.E190K	0	0	0	3.2206	0	0	0	0	0	2.9328	0	0	0	0
IDH1_p.P33S	0.967334	0	0	0	0	0	0	0.803384	0	0	0	0	0	0
IDH1_p.R132C	0.460396	0	0	0	0	0	0	0.543073	0	0	0	0	0	0
IDH1_p.R132H	1.99033	0	0	0	0	0	0	2.20094	0	0	0	0	0	0
IDH1_p.R132L	0.599771	0	0	0	0	0	0	0.712814	0	0	0	0	0	0
IDH1_p.R132S	0.355007	0	0	0	0	0	0	0.349919	0	0	0	0	0	0
IDH2_p.A416V	0	0	0	0.993003	0	0	0	0	1.03985	0	0	0	0	0
IDH2_p.A47V	0	0	0	1.53781	0	0	0	0	0	0	1.40571	0	0	0
IDH2_p.E268D	0	0	0	0	1.77203	0	0	0	0	0	0	0	0	2.35074
IDH2_p.G137E	0	0	2.49212	0	0	0	0	0	0	2.70861	0	0	0	0
IDH2_p.I139F	0	1.47325	0	0	0	0	0	0	0	0	1.51786	0	0	0
IDH2_p.R172K	0.24221	0	0	0	0	0	0	0.225616	0	0	0	0	0	0
IDH2_p.R172M	0.143183	0	0	0	0	0	0	0.127537	0	0	0	0	0	0
IDH2_p.T331M	0	0	0.293636	0	0	0	0	0	0	0.309869	0	0	0	0
IER3_p.A155T	0	3.94074	0	0	0	0	0	0	3.4002	0	0	0	0	0
IKZF5_p.E135K	0	0	0	0	0	3.2035	0	0	0	0	0	0	1.67894	0
ILKAP_p.S61Y	0	0	1.34288	0	0	0	0	0	0	1.11079	0	0	0	0
IRF4_p.K123R	0	0	0	0	0.0459551	0	0	0	0	0	0	0	0	0.372399
IRF4_p.R96L	0	0	0.223293	0	0	0	0	0	0	0	0.164275	0	0	0
ISX_p.R86C	0	0	0	0	0	2.82404	0	0	0	0	0	0	0	2.43231
ISX_p.T87A	0	0	0	0	0	2.36977	0	0	0	0	0	0	1.79745	0
JMJD5_p.A230T	0	0	0	0	5.5138	0	0	0	0	0	0	3.61901	0	0
KEAP1_p.E611D	0	0	0	2.75893	0	0	0	0	0	2.90102	0	0	0	0
KEAP1_p.G419W	0	0	0	2.03311	0	0	0	0	2.05141	0	0	0	0	0
KEAP1_p.G603W	0	0	2.36413	0	0	0	0	0	2.03401	0	0	0	0	0
KEAP1_p.P318L	0	2.46184	0	0	0	0	0	0	2.07678	0	0	0	0	0
KEAP1_p.R470H	0	0	2.10046	0	0	0	0	0	0	0	1.75103	0	0	0
KEAP1_p.S45F	0	0.741775	0	0	0	0	0	0	0	1.07215	0	0	0	0
KEAP1_p.T142M	0	0	1.10574	0	0	0	0	0	0	0	1.06296	0	0	0
KIF2B_p.E161G	0	0	0.442305	0	0	0	0	0	0.454053	0	0	0	0	0
KIF2B_p.E211K	0	0	0	0.594252	0	0	0	0	0	0.662402	0	0	0	0
KIF2B_p.G450V	0	1.25484	0	0	0	0	0	0	1.79765	0	0	0	0	0
KIF2B_p.I119T	0	0	0	1.0462	0	0	0	0	0.719161	0	0	0	0	0
KIF2B_p.Q430H	0	0	0	1.08773	0	0	0	0	0	1.33896	0	0	0	0
KIF2B_p.R504Q	0	0	0	0	1.2751	0	0	0	0	0	0	0	1.31207	0
KIF2B_p.T113M	0	0	0.832778	0	0	0	0	0	0	0	0.744063	0	0	0
KIF2B_p.W60L	0	0	1.66775	0	0	0	0	0	1.37573	0	0	0	0	0
KIR3DL2_p.R96Q	0	0	0	0	0	0.181864	0	0	0	0	0	0	0	0.915874
KLRC2_p.G174R	0	0	0	0	0	1.64362	0	0	0	0	0	1.233	0	0
KPNA3_p.V154G	0	0	0	0	0	1.90609	0	0	0	0	0	1.66718	0	0
KRAS_p.A59G	0	1.39101	0	0	0	0	0	0	0	1.64128	0	0	0	0
KRAS_p.D33E	0	0	0	0	3.57718	0	0	0	0	0	0	0	3.20979	0
KRAS_p.E62K	0	1.71164	0	0	0	0	0	0	0	1.87377	0	0	0	0
KRAS_p.G12A	1.06335	0	0	0	0	0	0	0.893877	0	0	0	0	0	0
KRAS_p.G12C	2.57353	0	0	0	0	0	0	2.74671	0	0	0	0	0	0
KRAS_p.G12D	1.96953	0	0	0	0	0	0	1.88241	0	0	0	0	0	0
KRAS_p.G12S	2.98303	0	0	0	0	0	0	2.62595	0	0	0	0	0	0
KRAS_p.G12V	1.5746	0	0	0	0	0	0	1.56822	0	0	0	0	0	0
KRT26_p.S2C	0	0	0	0	0	3.98391	0	0	0	0	0	0	0	3.22087
LacZ	0.0927489	0.0823271	0.0726183	0.313229	0.248308	0.231159	0.31295	0.0487121	0.131797	0	0.295616	0.728297	0.316965	0
LCE1B_p.G102C	0	0	0	0	0	1.93986	0	0	0	0	0	1.7995	0	0
LCE1B_p.S42F	0	0	0	0	0	1.69208	0	0	0	0	0	0	1.52547	0
LNX1_p.V564I	0	0	0	0	0	4.35961	0	0	0	0	0	3.49341	0	0
LUCIFERASE	0.0421053	0.810318	0	0.787089	0.808222	0.770896	0.854279	0.0951523	0	2.56334	0	0.864484	0	2.38458
MAGEC2_p.D15N	0	0	0	2.9309	0	0	0	0	0	0	2.89512	0	0	0
MAGEC2_p.E269K	0	0	0	2.75953	0	0	0	0	0	0	1.8642	0	0	0
MAGEC2_p.G74V	0	0	0	0.0827771	0	0	0	0	0	0.102065	0	0	0	0
MAGEC2_p.R287W	0	1.6071	0	0	0	0	0	0	0	1.64575	0	0	0	0
MAGEC2_p.S85I	0	0	1.66559	0	0	0	0	0	1.80375	0	0	0	0	0
MAP2K1_p.C121S	0	0	0.780406	0	0	0	0	0	0	0.714303	0	0	0	0
MAP2K1_p.E203K	0.90765	0	0	0	0	0	0	1.2644	0	0	0	0	0	0
MAP2K1_p.K57T	0	0	0	2.07282	0	0	0	0	0	2.01954	0	0	0	0
MAP2K1_p.L177M	0	0	3.44584	0	0	0	0	0	0	0	2.55844	0	0	0
MAP2K1_p.P124S	1.41484	0	0	0	0	0	0	1.43957	0	0	0	0	0	0
MAP2K1_p.S327T	0	0.150746	0	0	0	0	0	0	0	0.285036	0	0	0	0
MAP2K4_p.S184L	0.648196	0	0	0	0	0	0	0.567987	0	0	0	0	0	0
MAP2K5_p.P111S	0	0	0	0	0	3.79332	0	0	0	0	0	0	3.63759	0
MAP4K3_p.L536I	0	0.00058123	0	0	0	0	0	0	0	0.00114233	0	0	0	0
MAP4K3_p.Q473H	0	0	0	0.00347091	0	0	0	0	0	0.00297999	0	0	0	0
MAP4K3_p.R753Q	0	0	0	0	0.00106436	0	0	0	0	0	0	0.00260791	0	0
MAPK6_p.D387N	0	0	2.76663	0	0	0	0	0	0	0	2.08575	0	0	0
MEF2C_p.T9M	0	0	0	0.289256	0	0	0	0	0	0.285235	0	0	0	0
MET_p.R469Q	0	0	0	0	0.120335	0	0	0	0	0	0	0	0	0.373816
MET_p.S213L	0	0	0	0	0.0468317	0	0	0	0	0	0	0	0	0.320698
MET_p.T263M	0	0.0266121	0	0	0	0	0	0	0	0	0.0250228	0	0	0
MFAP4_p.Y55S	0	0	0	0	0	0.111868	0	0	0	0	0	0	0	0.31635
MTM1_p.D298E	0	0	0	0	0	1.90081	0	0	0	0	0	0	2.29215	0
MTM1_p.P226S	0	0	0	0	0	1.80426	0	0	0	0	0	0	1.49353	0
MTM1_p.R253Q	0	0	0	0	0	2.29648	0	0	0	0	0	2.16901	0	0
NBPF15_p.Y612C	0	0	0	1.32786	0	0	0	0	0	0.881629	0	0	0	0
NFE2L2	0.334875	0.246359	0.339567	0.37958	0.229963	0.229643	0.258127	0.335401	0.766221	0.422662	0	0.446298	0.812187	0
NFE2L2_p.G31A	0.0657529	0	0	0	0	0	0	0.045439	0	0	0	0	0	0
NFE2L2_p.G31R	0	0	0	0.0988806	0	0	0	0	0.123122	0	0	0	0	0
NFE2L2_p.G31V	0	0	0	0	0.0508386	0	0	0	0	0	0	0	0.0962767	0
NFE2L2_p.N160S	0	0	0	0	0.261769	0	0	0	0	0	0	0	0.299717	0
NFE2L2_p.T80K	0.127404	0	0	0	0	0	0	0.0633065	0	0	0	0	0	0
NFKBIA	0.370912	0.62146	0.990124	0.477371	0.293574	0.731376	0.770237	0.364128	0	0.953894	1.23347	1.02744	0.53831	0
NFKBIA_p.P137S	0	0	0.665327	0	0	0	0	0	0.598864	0	0	0	0	0
NRAS_p.G12A	2.62828	0	0	0	0	0	0	2.54474	0	0	0	0	0	0
NRAS_p.G12C	3.53149	0	0	0	0	0	0	3.85569	0	0	0	0	0	0
NRAS_p.Q61H	1.77596	0	0	0	0	0	0	1.72187	0	0	0	0	0	0
NRAS_p.Q61K	6.48292	0	0	0	0	0	0	5.32599	0	0	0	0	0	0
NRAS_p.Q61L	4.84379	0	0	0	0	0	0	4.47566	0	0	0	0	0	0
NRAS_p.Q61R	5.88236	0	0	0	0	0	0	5.68761	0	0	0	0	0	0
NRAS_p.Y64D	0	0	0.972962	0	0	0	0	0	0	0.853916	0	0	0	0
OMA1_p.P177S	0	0	0	0	0	0.0982765	0	0	0	0	0	0	0	0.611244
OR2G6_p.I177F	0	0	0	0	0	0.0281761	0	0	0	0	0	0.0382366	0	0
OR2G6_p.K236M	0	0	0	0	0	0.0703618	0	0	0	0	0	0	0.0563363	0
OR2G6_p.N294Y	0	0	0	0	0	0.0880307	0	0	0	0	0	0	0.054959	0
OR2G6_p.N42S	0	0	0	0	0	0.131157	0	0	0	0	0	0	0	0.702264
OR2G6_p.R265K	0	0	0	0	0	0.123212	0	0	0	0	0	0	0	0.339129
OR2G6_p.W149C	0	0	0	0	0	0.108052	0	0	0	0	0	0.254693	0	0
OR2M2_p.E232V	0	0	0	0	0	0.000418198	0	0	0	0	0	0.0024545	0	0
OR2M2_p.N42Y	0	0	0	0	0	0.00480928	0	0	0	0	0	0	0	0.0419657
OR2M2_p.P182S	0	0	0	0	0	0.00820713	0	0	0	0	0	0.0104316	0	0
OR2M2_p.V117I	0	0	0	0	0	0.000679572	0	0	0	0	0	0	0.00406618	0
OR2T33_p.F164V	0	0	0	0	0	0	0.223544	0	0	0	0	0.197511	0	0
OR2T33_p.L60P	0	0	0	0	0	0.294725	0	0	0	0	0	0.300332	0	0
OR2T33_p.P285L	0	0	0	0	0	0	0.0882381	0	0	0	0	0	0.100277	0
OR2T33_p.R120S	0	0	0	0	0	0.100472	0	0	0	0	0	0	0	0.400848
OR2T33_p.W147C	0	0	0	0	0	0	0.231512	0	0	0	0	0.176034	0	0
OR2T33_p.W49L	0	0	0	0	0	0.237484	0	0	0	0	0	0	0	0.467956
OTUD6A_p.R171P	0	0	0	0	0	0	1.77528	0	0	0	0	1.55159	0	0
OTUD6A_p.V211M	0	0	0	0	0	0	0	0	0	0	0	0	0	0.0289223
PDZD11_p.R133H	0	0	0	0	0	0	1.7255	0	0	0	0	0	1.56902	0
PEX3_p.G173E	0	0	0	0	0	0	0.0328834	0	0	0	0	0	0.0348249	0
PIK3CA_p.D1045V	0	1.62761	0	0	0	0	0	0	0	2.54004	0	0	0	0
PIK3CA_p.H1047Y	0.860773	0	0	0	0	0	0	0.903042	0	0	0	0	0	0
PIK3CB_p.A1048V	0	0	0	3.03809	0	0	0	0	0	2.56786	0	0	0	0
PIK3CB_p.A593V	0	1.6257	0	0	0	0	0	0	0	1.64853	0	0	0	0
PIK3CB_p.E497D	0	0	1.99039	0	0	0	0	0	1.95083	0	0	0	0	0
PIK3CG_p.K973R	0	2.37146	0	0	0	0	0	0	0	0	2.44067	0	0	0
PIK3CG_p.V168M	0	0	3.10897	0	0	0	0	0	2.50642	0	0	0	0	0
PIK3CG_p.W212C	0	0	2.36659	0	0	0	0	0	2.34592	0	0	0	0	0
PIK3IP1_p.G185E	0	0	0	2.76874	0	0	0	0	2.89662	0	0	0	0	0
PIK3R3_p.R383C	0	0	0	1.61635	0	0	0	0	1.70545	0	0	0	0	0
PIK3R4_p.E1209K	0	0	0	0	0	0	2.83998	0	0	0	0	2.85551	0	0
PIK3R4_p.N870T	0	0	0	0	0	0	0.869738	0	0	0	0	0	0.924466	0
PIK3R4_p.R998Q	0	0	0	0	0	0	2.64751	0	0	0	0	0	0	2.29082
POT1_p.G76V	0	0	0	3.5101	0	0	0	0	3.52262	0	0	0	0	0
POT1_p.L265H	0	0	2.0814	0	0	0	0	0	0	1.71086	0	0	0	0
POT1_p.L388M	0	0	0	2.80659	0	0	0	0	0	0	2.46873	0	0	0
PPIAL4G_p.N35H	0	0	0	0	0	0	1.24266	0	0	0	0	0	1.69081	0
PPP2R1A_p.R258H	0.863159	0	0	0	0	0	0	0.736766	0	0	0	0	0	0
PPP2R1A_p.S143F	0	0	0	0	2.59446	0	0	0	0	0	0	3.05183	0	0
PPP6C_p.E180K	0	0	0	0	3.76801	0	0	0	0	0	0	3.06426	0	0
PPP6C_p.R264C	0	0	0	1.80358	0	0	0	0	1.95255	0	0	0	0	0
PRR23B_p.A246T	0	0	0	0	0	0	0.00106247	0	0	0	0	0.000575274	0	0
PRR23B_p.E140K	0	0	0	0	0	0	0.00738416	0	0	0	0	0.0261558	0	0
PRR23B_p.H245Q	0	0	0	0	0	0	0.0027093	0	0	0	0	0	0.00603369	0
PSG2_p.H245Y	0	0	0	0	0	0	0.294942	0	0	0	0	0.255997	0	0
PSG2_p.S265C	0	0	0	0	0	0	4.2094	0	0	0	0	3.17283	0	0
PTEN_p.F90S	0	0.604314	0	0	0	0	0	0	0	1.17382	0	0	0	0
PTEN_p.G127R	1.81852	0	0	0	0	0	0	1.47827	0	0	0	0	0	0
PTEN_p.G127V	0	0	0	2.83719	0	0	0	0	0	0	2.18837	0	0	0
PTEN_p.G129E	1.246	0	0	0	0	0	0	1.60892	0	0	0	0	0	0
PTEN_p.G129V	0	1.51867	0	0	0	0	0	0	1.4932	0	0	0	0	0
PTEN_p.K6N	0	0	0.0874274	0	0	0	0	0	0.0685972	0	0	0	0	0
PTEN_p.R173H	0.783217	0	0	0	0	0	0	0.731529	0	0	0	0	0	0
PTEN_p.R233Q	0	0	0.88353	0	0	0	0	0	0.634726	0	0	0	0	0
PTPN12_p.E57D	0	0	0.634244	0	0	0	0	0	0	0.769334	0	0	0	0
PTPN12_p.E5G	0	0.395776	0	0	0	0	0	0	0	0	0.419664	0	0	0
PTPN12_p.G99R	0	0.538302	0	0	0	0	0	0	0.296027	0	0	0	0	0
RAB42_p.A61T	0	0	0	0	0	0	0.826229	0	0	0	0	0	0	0.939976
RAC1_p.P29S	0.206592	0	0	0	0	0	0	0.162772	0	0	0	0	0	0
RASA1_p.E510K	0	0	0	0.385311	0	0	0	0	0	0	0.320695	0	0	0
RASA1_p.L146S	0	0.558687	0	0	0	0	0	0	0.582824	0	0	0	0	0
RASA1_p.R194C	0	0.935574	0	0	0	0	0	0	0	0	1.00439	0	0	0
RASA1_p.R913Q	0	0	1.41176	0	0	0	0	0	0	0	1.45323	0	0	0
RB1_p.F755I	0	0	0	0.614432	0	0	0	0	0.466865	0	0	0	0	0
RB1_p.I782M	0	0.168515	0	0	0	0	0	0	0.30097	0	0	0	0	0
RB1_p.L550I	0	0	0	0.371024	0	0	0	0	0	0.459911	0	0	0	0
RB1_p.R451H	0	0	0.458695	0	0	0	0	0	0.355445	0	0	0	0	0
RB1_p.V654L	0	0.126002	0	0	0	0	0	0	0	0.234922	0	0	0	0
RBM10_p.R171W	0	0.00220037	0	0	0	0	0	0	0	0	0.0011221	0	0	0
RBM11_p.R74C	0	0	0	0	0	0	2.82468	0	0	0	0	0	1.70865	0
REG1A_p.E80K	0	0	0	4.76088	0	0	0	0	0	4.41311	0	0	0	0
REG1A_p.P105T	0	0	1.04674	0	0	0	0	0	1.04792	0	0	0	0	0
REG1A_p.S131I	0	2.50108	0	0	0	0	0	0	0	0	3.16516	0	0	0
REG1B_p.A82T	0	0	0	0	0	0	1.56661	0	0	0	0	1.66032	0	0
REG1B_p.C64W	0	0	0	0	0	0	1.31757	0	0	0	0	0	1.91904	0
REG1B_p.K157T	0	0	0	0	0	0	5.7529	0	0	0	0	0	3.92734	0
REG1B_p.P30S	0	0	0	0	0	0	1.33011	0	0	0	0	0	1.13276	0
REG3A_p.G85R	0	0	0	0	0	0	3.31836	0	0	0	0	0	2.81419	0
REG3A_p.P109S	0	0	0	0	0	0	5.32972	0	0	0	0	0	0	3.55121
RHEB	0.35371	0.503097	0.475432	0.699953	0.794135	1.29856	1.35709	0.475453	0.561539	1.41232	0	0.724232	1.00238	1.21077
RHOA_p.E40Q	0	1.10326	0	0	0	0	0	0	0	0	1.83098	0	0	0
RHOA_p.F106L	0	0.948236	0	0	0	0	0	0	0	1.4078	0	0	0	0
RHOA_p.G62E	0	0	0.107481	0	0	0	0	0	0	0.122974	0	0	0	0
RHOA_p.R5Q	0	1.45133	0	0	0	0	0	0	0	0	1.89758	0	0	0
RHOA_p.S85F	0	1.68503	0	0	0	0	0	0	2.30351	0	0	0	0	0
RHOA_p.T175M	0	0	0.0625914	0	0	0	0	0	0.0743473	0	0	0	0	0
RHOA_p.Y42C	0	2.38583	0	0	0	0	0	0	1.757	0	0	0	0	0
RHOA_p.Y42S	0	0	0	1.14415	0	0	0	0	0.971256	0	0	0	0	0
SAMHD1_p.D218H	0	0	0	1.03356	0	0	0	0	0.771416	0	0	0	0	0
SAMHD1_p.I515T	0	0	1.23953	0	0	0	0	0	1.31424	0	0	0	0	0
SCEL_p.S10Y	0	0	0	0	3.57561	0	0	0	0	0	0	3.10993	0	0
SERPINB4_p.A137E	0	0	0	0.834633	0	0	0	0	0	0	0.604923	0	0	0
SERPINB4_p.E110K	0	0.260184	0	0	0	0	0	0	0	0.265269	0	0	0	0
SERPINB4_p.E250K	0	0.405076	0	0	0	0	0	0	0	0.794316	0	0	0	0
SERPINB4_p.E290K	0	0	0	0	0.568742	0	0	0	0	0	0	0.543174	0	0
SERPINB4_p.F182I	0	0	0	1.76387	0	0	0	0	0	1.61724	0	0	0	0
SERPINB4_p.T347N	0	0.521737	0	0	0	0	0	0	0	1.65315	0	0	0	0
SGK1_p.A48G	0	0	3.22814	0	0	0	0	0	1.90408	0	0	0	0	0
SGK1_p.F27L	0	0	1.68175	0	0	0	0	0	0	0	0.981947	0	0	0
SLC2A3_p.F88S	0	1.29697	0	0	0	0	0	0	0	0	2.00799	0	0	0
SLC2A3_p.G109V	0	0	0	1.49374	0	0	0	0	0	0	1.8206	0	0	0
SLC2A3_p.K49N	0	1.56542	0	0	0	0	0	0	0	2.11619	0	0	0	0
SLC46A1_p.W299S	0	0	0	0	0	0	1.79127	0	0	0	0	1.64528	0	0
SMAD2_p.D304G	0	0	0	2.50959	0	0	0	0	0	0	1.96316	0	0	0
SMAD4_p.D537Y	1.12211	0	0	0	0	0	0	0.812549	0	0	0	0	0	0
SMAD4_p.E134K	0	0	0	1.2911	0	0	0	0	1.15082	0	0	0	0	0
SMAD4_p.K519N	0	0	0	2.12658	0	0	0	0	0	0	1.6506	0	0	0
SMAD4_p.R361H	1.81681	0	0	0	0	0	0	1.82572	0	0	0	0	0	0
SMAD4_p.R361P	0	0	0	0	0.773349	0	0	0	0	0	0	0	0	1.33837
SMAD4_p.R97H	0	0	1.9202	0	0	0	0	0	0	0	1.32402	0	0	0
SNURF_p.M1I	0	0	2.66447	0	0	0	0	0	0	0	1.69212	0	0	0
SPAG8_p.P344L	0	0	0	0	0	0	4.97145	0	0	0	0	0	0	3.54847
SPANXN4_p.P4Q	0	0	0	0	0	0	1.59424	0	0	0	0	0	0	2.74346
SPATA8_p.E18K	0	0	0	0	0	0	2.39061	0	0	0	0	0	1.46783	0
SPATA8_p.P83T	0	0	0	0	0	0	1.4975	0	0	0	0	0	0	1.93931
SPOP_p.E47A	0	0	0.180678	0	0	0	0	0	0	0.116617	0	0	0	0
SPOP_p.E50K	0	0.0452529	0	0	0	0	0	0	0.0927072	0	0	0	0	0
SPOP_p.F102C	0	0	0	0.669119	0	0	0	0	0	0.594508	0	0	0	0
SPOP_p.F133S	0	0.201064	0	0	0	0	0	0	0.212954	0	0	0	0	0
SPOP_p.K101I	0	0	0	0.974276	0	0	0	0	0	0.767943	0	0	0	0
SPOP_p.K134N	0	0	0.117585	0	0	0	0	0	0	0.157939	0	0	0	0
SPOP_p.W131C	0	0	1.04014	0	0	0	0	0	0	1.10553	0	0	0	0
SPOP_p.W131G	0	0	0.141843	0	0	0	0	0	0	0.197623	0	0	0	0
STAG2_p.E134D	0	0.759793	0	0	0	0	0	0	1.33815	0	0	0	0	0
STAG2_p.L997W	0	0.808243	0	0	0	0	0	0	0	0	1.06762	0	0	0
STAG2_p.P572S	0	0	0.0151176	0	0	0	0	0	0	0.0149496	0	0	0	0
STAG2_p.R252Q	0	0	0	1.20029	0	0	0	0	0.737017	0	0	0	0	0
STAG2_p.R541K	0	0	0	0	1.42774	0	0	0	0	0	0	0	1.49662	0
STAT6_p.D46N	0	0	0	0	0	0	0	0	0	0	0	0	0	0
STAT6_p.N417Y	0	0	1.89378	0	0	0	0	0	0	1.97578	0	0	0	0
STK11_p.D194Y	2.11175	0	0	0	0	0	0	2.44681	0	0	0	0	0	0
STK19_p.E88K	0	0	0	0	0	0	0.645025	0	0	0	0	0	0.773821	0
SV2C_p.G146S	0	0	0	0	0	0	0.136421	0	0	0	0	0	0	0.599902
SV2C_p.G630S	0	0	0	0	0	0	0.0800571	0	0	0	0	0.0928109	0	0
SV2C_p.M727I	0	0	0	0	0	0	0.171961	0	0	0	0	0	0.124871	0
SV2C_p.R121Q	0	0	0	0	0	0	0.055514	0	0	0	0	0	0	0.180717
SYCP1_p.D889N	0	0	0	0	0	0	1.84774	0	0	0	0	1.47351	0	0
SYCP1_p.E442K	0	0	0	0	0	0	2.99101	0	0	0	0	0	0	2.6273
SYCP1_p.E509K	0	0	0	0	0	0	1.89794	0	0	0	0	2.1113	0	0
SYCP1_p.E773K	0	0	0	0	0	0	2.40548	0	0	0	0	0	2.07677	0
TBL1XR1_p.L81V	0	0	1.14527	0	0	0	0	0	0	1.0874	0	0	0	0
TBL1XR1_p.R166Q	0	0	0	1.91522	0	0	0	0	0	0	2.41582	0	0	0
TBL1XR1_p.T349M	0	0	3.04719	0	0	0	0	0	0	2.05262	0	0	0	0
THEMIS_p.D240N	0	0	0	0	0	0	0.146568	0	0	0	0	0	0	0.349903
THEMIS_p.E503K	0	0	0	0	0	0	1.55227	0	0	0	0	0	0	1.60037
THEMIS_p.H366Q	0	0	0	0	0	0	2.64411	0	0	0	0	0	0	2.13335
THEMIS_p.P216S	0	0	0	0	0	0	1.24814	0	0	0	0	0	1.15355	0
THEMIS_p.R196I	0	0	0	0	0	0	4.64868	0	0	0	0	0	3.32607	0
TMPO_p.D185H	0	0	0	0	0	0	0.51397	0	0	0	0	0	0	1.06285
TNF_p.S157R	0	1.24292	0	0	0	0	0	0	0	0	2.40881	0	0	0
TNFRSF14_p.A102P	0	0	0	2.87528	0	0	0	0	0	2.8064	0	0	0	0
TP53_p.C176F	0.839302	0	0	0	0	0	0	0.814012	0	0	0	0	0	0
TP53_p.C275F	0.266067	0	0	0	0	0	0	0.289269	0	0	0	0	0	0
TP53_p.C275S	0.260124	0	0	0	0	0	0	0.247989	0	0	0	0	0	0
TP53_p.I195F	0.6212	0	0	0	0	0	0	0.647775	0	0	0	0	0	0
TP53_p.M246R	2.05508	0	0	0	0	0	0	2.53546	0	0	0	0	0	0
TP53_p.S215I	0.470148	0	0	0	0	0	0	0.605763	0	0	0	0	0	0
TRAF3_p.D463N	0	0.644045	0	0	0	0	0	0	0	0	0.757977	0	0	0
TRAF3_p.N312S	0	1.66606	0	0	0	0	0	0	0	0	1.54008	0	0	0
TRAT1_p.D40Y	0	0	0	0	0	0	0.011634	0	0	0	0	0	0	0.0101134
TRAT1_p.E76K	0	0	0	0	0	0	2.73942	0	0	0	0	2.13964	0	0
TRIM55_p.E369G	0	0	0	0	0	0	1.41303	0	0	0	0	1.0623	0	0
TRIM55_p.R322H	0	0	0	0	0	0	3.46641	0	0	0	0	0	3.43127	0
TUBB_p.R359P	0	0	0	0	0	0	1.34785	0	0	0	0	1.44497	0	0
U2AF1_p.S34F	0.0223501	0	0	0	0	0	0	0.00901078	0	0	0	0	0	0
VHL_p.E186K	0	0	0	0	1.04971	0	0	0	0	0	0	0	0.918695	0
VHL_p.H115Y	1.36872	0	0	0	0	0	0	1.62537	0	0	0	0	0	0
VHL_p.L158V	0	2.1381	0	0	0	0	0	0	0	2.54372	0	0	0	0
VHL_p.R161P	1.91742	0	0	0	0	0	0	1.98222	0	0	0	0	0	0
VHL_p.S111N	0.983615	0	0	0	0	0	0	0.903273	0	0	0	0	0	0
VHL_p.V130F	1.97941	0	0	0	0	0	0	2.50072	0	0	0	0	0	0
WBSCR17_p.A398V	0	0	0	0	0	0	0.0667762	0	0	0	0	0.0551496	0	0
WBSCR17_p.D348N	0	0	0	0	0	0	0.0466955	0	0	0	0	0	0.0203965	0
WBSCR17_p.E289K	0	0	0	0	0	0	0.0197619	0	0	0	0	0	0.0322015	0
WBSCR17_p.E507K	0	0	0	0	0	0	0.0385145	0	0	0	0	0	0	0.215783
WBSCR17_p.S194R	0	0	0	0	0	0	0.475455	0	0	0	0	0	0	0.562284
WIPI1_p.P139S	0	0.0566285	0	0	0	0	0	0	0.0939177	0	0	0	0	0
WISP2_p.R230L	0	0	0	2.33128	0	0	0	0	0	0	1.68909	0	0	0
WNK3_p.E417Q	0	0	0	0	0.315989	0	0	0	0	0	0	0.362423	0	0
WNK3_p.E537G	0	0	0	0.129634	0	0	0	0	0	0	0.156084	0	0	0
WNK3_p.S617F	0	0.0622747	0	0	0	0	0	0	0	0.100525	0	0	0	0
WNK3_p.T237M	0	0	0.0761278	0	0	0	0	0	0	0	0.0472403	0	0	0
WNK3_p.V488A	0	0	0	0.154819	0	0	0	0	0	0.162459	0	0	0	0
WNT2_p.V334M	0	0.227386	0	0	0	0	0	0	0.247001	0	0	0	0	0
XPO1_p.E571A	0	0	0	0.00379378	0	0	0	0	0.00312723	0	0	0	0	0
XPO1_p.E571K	0	0	0	0	0.0026922	0	0	0	0	0	0	0.00724846	0	0
XPO1_p.R553C	0	0	0.00289239	0	0	0	0	0	0	0	0.00241251	0	0	0
YTHDC1_p.E483Q	0	0	0	0	0	0	0.00111559	0	0	0	0	0.00130396	0	0
YTHDC1_p.R267Q	0	0	0	0	0	0	0.00239056	0	0	0	0	0.00655813	0	0
ZDHHC4_p.R174H	0	0	0	0	0	0	0.263917	0	0	0	0	0	0	0.546027
ZNF454_p.H462Y	0	0	0	0	0	0	3.58647	0	0	0	0	0	0	2.70906
ZNF454_p.P299L	0	0	0	0	0	0	0.912024	0	0	0	0	0	0	1.58269
ZNF454_p.R376I	0	0	0	0	0	0	1.48098	0	0	0	0	0	1.47688	0

## Sheet: pre-injection
Supplementary Table S4B: Composition of Pre-injection cell culture
Mutation	Pool1	Pool2	Pool3	Pool4	Pool5	Pool6	Pool7	Pool8	Pool9	Pool10	Pool11	Pool12	Pool13	Pool14
A4GALT_p.A272V	0	0	0	0	0.00309854	0	0	0	0	0	0	0	0	0
ACTG1_p.A22P	0	0	0	0	2.13395	0	0	0	0	0	0	0	1.58563	0
ACTG1_p.K61E	0	0	0	0	0.0969402	0	0	0	0	0	0	0	0.0859681	0
ACVR1B_p.D335N	0	0	0	0.102493	0	0	0	0	0.0697924	0	0	0	0	0
ACVR1B_p.E412D	0	1.22557	0	0	0	0	0	0	0	0	1.0759	0	0	0
ACVR2A_p.A381V	0	0	0	2.09085	0	0	0	0	1.9466	0	0	0	0	0
ADORA2A_p.R220W	0	0	0.0796751	0	0	0	0	0	0.0827892	0	0	0	0	0
AKT1_p.D44N	0	1.32042	0	0	0	0	0	0	0	0	2.06654	0	0	0
AKT1_p.E17K	3.0734	0	0	0	0	0	0	3.67357	0	0	0	0	0	0
AKT1_p.E267G	0	1.13596	0	0	0	0	0	0	1.5754	0	0	0	0	0
AKT1_p.L52R	0	0.80817	0	0	0	0	0	0	0	0	1.16223	0	0	0
AKT1_p.Q79K	0	0	1.84344	0	0	0	0	0	0	1.48517	0	0	0	0
AKT1_p.R370C	0	5.67534	0	0	0	0	0	0	5.27267	0	0	0	0	0
AKT1_p.V201I	0	0	0	1.79056	0	0	0	0	0	2.05254	0	0	0	0
ARSI_p.P228L	0	0	0	0.160615	0	0	0	0	0	0	0.0969571	0	0	0
ARSI_p.V373M	0	0	0.493171	0	0	0	0	0	0.36872	0	0	0	0	0
ASCL4_p.T114M	0	0	0	0	1.7797	0	0	0	0	0	0	0	0.379692	0
B2M_p.A6V	0	0	0	1.31512	0	0	0	0	0	0	1.16924	0	0	0
B2M_p.C100S	0	1.53732	0	0	0	0	0	0	2.14914	0	0	0	0	0
B2M_p.D54N	0	0	0	0.988174	0	0	0	0	1.14673	0	0	0	0	0
B2M_p.M1I	0	0	1.16288	0	0	0	0	0	0	0	1.08662	0	0	0
B2M_p.M1L	0	0	2.83171	0	0	0	0	0	0	1.57811	0	0	0	0
B2M_p.M1R	0	2.06858	0	0	0	0	0	0	0	0	2.24666	0	0	0
B2M_p.M1V	0	0	1.60814	0	0	0	0	0	1.44986	0	0	0	0	0
B2M_p.Y30H	0	0	2.45937	0	0	0	0	0	0	2.20149	0	0	0	0
BAP1_p.D75G	0	0	0.760849	0	0	0	0	0	0.752766	0	0	0	0	0
BAP1_p.N299S	0	0.118941	0	0	0	0	0	0	0	0.221922	0	0	0	0
BCR_p.A426S	0	0	0.930694	0	0	0	0	0	0.717682	0	0	0	0	0
BFP	2.44178	1.50954	2.53918	1.82636	1.84028	2.2271	2.78142	2.46349	0	6.54904	0	1.96373	4.49422	0
BRAF_p.G466A	0.486463	0	0	0	0	0	0	0.342165	0	0	0	0	0	0
BRAF_p.G466E	3.08019	0	0	0	0	0	0	2.25147	0	0	0	0	0	0
BRAF_p.G466V	2.21392	0	0	0	0	0	0	1.91389	0	0	0	0	0	0
BRAF_p.L597Q	0.0555166	0	0	0	0	0	0	0.0643216	0	0	0	0	0	0
BRAF_p.N581S	0.51027	0	0	0	0	0	0	0.361505	0	0	0	0	0	0
BRAF_p.V600E	0.00634188	0	0	0	0	0	0	0.00580184	0	0	0	0	0	0
BTC_p.P70S	0	0	0	0	1.52303	0	0	0	0	0	0	0	2.0895	0
C15orf23_p.P26L	0	0	0	0	2.12117	0	0	0	0	0	0	0	4.11453	0
C15orf23_p.P26S	0	0	0	0	3.91839	0	0	0	0	0	0	3.88585	0	0
C19orf48_p.L70F	0	0	0	0	0.729865	0	0	0	0	0	0	0.614894	0	0
C1orf150_p.G2E	0	0	0	0	3.32271	0	0	0	0	0	0	0	1.04356	0
C1orf150_p.Y89N	0	0	0	0	0.51322	0	0	0	0	0	0	0	1.08893	0
C20orf72_p.P102S	0	0	0	0	2.21091	0	0	0	0	0	0	0	1.65966	0
CBFB_p.R151H	0	0	0.302614	0	0	0	0	0	0.22568	0	0	0	0	0
CCNG1_p.E167K	0	0	1.17234	0	0	0	0	0	0	1.153	0	0	0	0
CD3E_p.E189Q	0	0	0	0.0291402	0	0	0	0	0	0.0259496	0	0	0	0
CD70_p.D165Y	0	0	0	0	0.417987	0	0	0	0	0	0	0	0.470437	0
CD79B_p.H194N	0	0	0.901074	0	0	0	0	0	0	0.755356	0	0	0	0
CDK17_p.M85I	0	0	0	0	1.71312	0	0	0	0	0	0	2.20549	0	0
CDK17_p.R177H	0	0	0	0	1.71659	0	0	0	0	0	0	0	1.28952	0
CDK4_p.A23S	0	0	1.74326	0	0	0	0	0	0	0	1.6389	0	0	0
CDKN1B_p.C29F	0	0	0	0.155115	0	0	0	0	0.169335	0	0	0	0	0
CHD2_p.E287Q	0	0	4.38517	0	0	0	0	0	0	0	2.46116	0	0	0
CHD2_p.E412K	0	1.1521	0	0	0	0	0	0	0	0	1.39637	0	0	0
CHD2_p.P195L	0	0	2.12389	0	0	0	0	0	0	1.42846	0	0	0	0
CHD2_p.P474R	0	2.64045	0	0	0	0	0	0	3.48203	0	0	0	0	0
CHSY3_p.I628M	0	0	0	0	0.700461	0	0	0	0	0	0	0.465291	0	0
CHSY3_p.R350H	0	0	0	0	0.97933	0	0	0	0	0	0	0.718017	0	0
CNBD1_p.A426S	0	0	0	0	0.963837	0	0	0	0	0	0	0	2.10144	0
CNBD1_p.F343C	0	0	0	0	2.24164	0	0	0	0	0	0	2.7151	0	0
CNBD1_p.L396P	0	0	0	0	2.87893	0	0	0	0	0	0	0	2.8465	0
CNBD1_p.L396R	0	0	0	0	4.0061	0	0	0	0	0	0	0	0	5.61674
CNBD1_p.S372N	0	0	0	0	3.96961	0	0	0	0	0	0	4.23866	0	0
CNBD1_p.Y200F	0	0	0	0	2.97176	0	0	0	0	0	0	3.70065	0	0
COPS2_p.A317D	0	0	0	0	1.86134	0	0	0	0	0	0	0	0	2.02413
COPS2_p.G68R	0	0	0	0	1.28988	0	0	0	0	0	0	1.08419	0	0
CPXCR1_p.A56S	0	0	0	0	1.58683	0	0	0	0	0	0	1.46083	0	0
CPXCR1_p.E73K	0	0	0	0	0.00967505	0	0	0	0	0	0	0	0.03582	0
CPXCR1_p.S102P	0	0	0	0	1.06324	0	0	0	0	0	0	0	0	1.33943
CTCF_p.N568K	0	0.00411747	0	0	0	0	0	0	0	0	0.00459787	0	0	0
CTCF_p.P552S	0	0	0	0	0.0236501	0	0	0	0	0	0	0	0	0.0500182
CTCF_p.R377C	0	0.176013	0	0	0	0	0	0	0.421233	0	0	0	0	0
CTCF_p.R377H	0	0	0	0.515162	0	0	0	0	0	0.665178	0	0	0	0
CTNNB1_p.D162E	0	0	0.61006	0	0	0	0	0	0	0	0.321583	0	0	0
CTNNB1_p.G34E	0.054812	0	0	0	0	0	0	0.0472742	0	0	0	0	0	0
CTNNB1_p.G34R	0.104893	0	0	0	0	0	0	0.0961243	0	0	0	0	0	0
CTNNB1_p.G34V	0.019378	0	0	0	0	0	0	0.0156148	0	0	0	0	0	0
CTNNB1_p.H36Y	0.147977	0	0	0	0	0	0	0.145261	0	0	0	0	0	0
CTNNB1_p.I35S	0.0754986	0	0	0	0	0	0	0.0629607	0	0	0	0	0	0
CTNNB1_p.R535Q	0	0	0	2.0085	0	0	0	0	0	0	1.81254	0	0	0
CTNNB1_p.T257I	0	0.926682	0	0	0	0	0	0	0.650744	0	0	0	0	0
CYLC2_p.D299Y	0	0	0	0	0.482677	0	0	0	0	0	0	0	0	0.808497
CYLC2_p.E133K	0	0	0	0	0.214242	0	0	0	0	0	0	0.312327	0	0
CYLC2_p.E152K	0	0	0	0	0.279185	0	0	0	0	0	0	0	0.573121	0
CYLC2_p.R71C	0	0	0	0	0.107627	0	0	0	0	0	0	0	0.0907441	0
CYLC2_p.V105F	0	0	0	0	0.204504	0	0	0	0	0	0	0	0	0.243241
CYP3A5_p.D336N	0	0	1.80443	0	0	0	0	0	0	0	1.48096	0	0	0
CYP3A5_p.G177R	0	0	0	0	3.02076	0	0	0	0	0	0	0	0	4.63442
DCAF4L2_p.A79V	0	0	0	0	0.781212	0	0	0	0	0	0	0	0	1.17204
DCAF4L2_p.G100V	0	0	0	0	0.999502	0	0	0	0	0	0	0	0	1.5988
DCAF4L2_p.L37H	0	0	0	0	0.980405	0	0	0	0	0	0	0	0.730729	0
DCAF4L2_p.P160L	0	0	0	0	1.338	0	0	0	0	0	0	0	2.58382	0
DCAF4L2_p.P364L	0	0	0	0	0.988183	0	0	0	0	0	0	0	0	1.16376
DCAF4L2_p.R172C	0	0	0	0	1.82239	0	0	0	0	0	0	0	0.905053	0
DCAF4L2_p.V332L	0	0	0	0	1.06033	0	0	0	0	0	0	0.948902	0	0
DNAJC12_p.R178C	0	2.25509	0	0	0	0	0	0	2.4214	0	0	0	0	0
DNASE2_p.Y182H	0	0	0	0	0.522769	0	0	0	0	0	0	0.649295	0	0
DNMT3A	0.916704	0.81773	1.62934	1.06089	1.15203	1.44515	1.88207	0.823002	4.74167	0	0	5.40029	0	0
DNMT3A_p.A910V	0	0.287507	0	0	0	0	0	0	0.555334	0	0	0	0	0
DNMT3A_p.G746V	0	0	0.891478	0	0	0	0	0	0	0	0.431664	0	0	0
DNMT3A_p.Q485H	0	0	1.71143	0	0	0	0	0	0	0	0.897701	0	0	0
EDNRB_p.F292L	0	0	0	0.155749	0	0	0	0	0.108482	0	0	0	0	0
EDNRB_p.L349I	0	0	0.0507463	0	0	0	0	0	0.0120953	0	0	0	0	0
eGFP	1.89335	3.00278	2.78594	2.47189	2.7505	2.90757	1.27511	1.61442	0	0	6.60245	0	0	8.4149
EGFR_p.A289V	0.686635	0	0	0	0	0	0	0.533626	0	0	0	0	0	0
EGFR_p.G719D	0.708831	0	0	0	0	0	0	0.783606	0	0	0	0	0	0
EGFR_p.P622S	0	1.12385	0	0	0	0	0	0	0	1.4975	0	0	0	0
EIF1AX_p.G9R	0	0	0	0	0.41413	0	0	0	0	0	0	0	0	0.375243
ELF1_p.P32S	0	0	0	0.144326	0	0	0	0	0.107731	0	0	0	0	0
ELF3_p.A332V	0	0	0	0	2.85983	0	0	0	0	0	0	0	2.06562	0
ERBB2_p.R897Q	0	0	0	0.588092	0	0	0	0	0	0	0.330154	0	0	0
ERBB2_p.T182I	0	0	0	0.291455	0	0	0	0	0	0.352081	0	0	0	0
ERBB2_p.V842I	0.464165	0	0	0	0	0	0	0.678457	0	0	0	0	0	0
ERBB2IP_p.E463K	0	0	0	0	0.464971	0	0	0	0	0	0	0	0	0.583094
ERBB2IP_p.I979M	0	0	0	0	0	0.633415	0	0	0	0	0	0	0.642373	0
EYS_p.C554S	0	0	0	0	0	1.97468	0	0	0	0	0	0	1.32534	0
EYS_p.F336L	0	0	0	0	0	2.1336	0	0	0	0	0	1.64676	0	0
EYS_p.H466N	0	0	0	0	0	1.48657	0	0	0	0	0	0	0	1.92616
EYS_p.N269H	0	0	0	0	0	1.57057	0	0	0	0	0	1.22659	0	0
EYS_p.Q172L	0	0	0	0	0	1.52571	0	0	0	0	0	0	0	1.77875
EYS_p.R26Q	0	0	0	0	0	3.60318	0	0	0	0	0	0	0	4.04362
EYS_p.R587I	0	0	0	0	0	2.03935	0	0	0	0	0	0	1.86503	0
FAM116A_p.R427H	0	0	0	0	0	4.9807	0	0	0	0	0	0	0	5.2213
FAM196A_p.Q46R	0	0	0	0	0	0.500361	0	0	0	0	0	0	0	0.795011
FAM196A_p.R399Q	0	0	0	0	0	0.856455	0	0	0	0	0	0	0.838189	0
FAM200A_p.S481N	0	0	0	0	0	0.942933	0	0	0	0	0	0	2.79874	0
FBXO15_p.E410K	0	0	0.463068	0	0	0	0	0	0	0	0.345064	0	0	0
FBXO15_p.S366G	0	1.26707	0	0	0	0	0	0	1.88913	0	0	0	0	0
FBXO16_p.T50K	0	0	0	0	0	1.00347	0	0	0	0	0	1.11523	0	0
FBXW7_p.A502V	0	0	0.258012	0	0	0	0	0	0	0	0.147668	0	0	0
FBXW7_p.I347M	0	0	0.106809	0	0	0	0	0	0.105778	0	0	0	0	0
FBXW7_p.R465C	4.25178	0	0	0	0	0	0	3.93358	0	0	0	0	0	0
FBXW7_p.R465H	0	5.7186	0	0	0	0	0	0	0	0	6.17369	0	0	0
FBXW7_p.R505C	0	4.9106	0	0	0	0	0	0	0	9.70667	0	0	0	0
FBXW7_p.R658Q	0	0	0	0.0253853	0	0	0	0	0	0	0.031828	0	0	0
FBXW7_p.R689Q	0	0	0	0.000423088	0	0	0	0	0	0.000763223	0	0	0	0
FBXW7_p.S462Y	0	0	0	0.000687517	0	0	0	0	0	0.00135032	0	0	0	0
FGF1_p.G44C	0	3.29788	0	0	0	0	0	0	0	0	2.82483	0	0	0
FGFR2_p.G384E	0	0	0	1.10362	0	0	0	0	0	0.84477	0	0	0	0
FGFR2_p.P253L	0	0.30258	0	0	0	0	0	0	0	0	0.410952	0	0	0
FGFR2_p.P253R	0.238425	0	0	0	0	0	0	0.221544	0	0	0	0	0	0
FGFR2_p.R165W	0	0	0	4.78925	0	0	0	0	0	0	3.22954	0	0	0
FGFR2_p.R251Q	0.284177	0	0	0	0	0	0	0.202062	0	0	0	0	0	0
FTH1_p.A161T	0	0	1.14272	0	0	0	0	0	0.886566	0	0	0	0	0
GABRA6_p.A322T	0	0	0	0	0	0.00866843	0	0	0	0	0	0.00728017	0	0
GABRA6_p.G175R	0	0	0	0	0	0.00976919	0	0	0	0	0	0	0	0.0133429
GABRA6_p.G212R	0	0	0	0	0	0.0229782	0	0	0	0	0	0.0151204	0	0
GABRA6_p.P345S	0	0	0	0	0	0.0284132	0	0	0	0	0	0.0245606	0	0
GABRA6_p.R238K	0	0	0	0	0	0.023391	0	0	0	0	0	0	0.026268	0
GALNT14_p.A187T	0	0	0	0	0	0.656118	0	0	0	0	0	0	0	0.507103
GALNT14_p.F285L	0	0	0	0	0	0.0629493	0	0	0	0	0	0	0.255516	0
GALNT14_p.P484S	0	0	0	0	0	0.338688	0	0	0	0	0	0	0.212532	0
GALNT14_p.R336Q	0	0	0	0	0	0.0196072	0	0	0	0	0	0	0.01194	0
GALNT14_p.V534F	0	0	0	0	0	0.37921	0	0	0	0	0	0	0.245964	0
GALNTL5_p.D221E	0	0	0	0	0	0.756768	0	0	0	0	0	0	1.02923	0
GALNTL5_p.G309E	0	0	0	0	0	0.471948	0	0	0	0	0	0	1.19161	0
GATA3_p.R330K	0	2.8833	0	0	0	0	0	0	0	0	4.15545	0	0	0
GATA3_p.S118F	0	0	0	0.430016	0	0	0	0	0	0	0.343814	0	0	0
GATA3_p.S140F	0	0.27204	0	0	0	0	0	0	0	0	0.271944	0	0	0
GCET2_p.H177Q	0	0	0	0	0	0.107323	0	0	0	0	0	0.0508812	0	0
GEN1_p.L235R	0	0	0	0	0	1.46669	0	0	0	0	0	1.08699	0	0
GNA13_p.L374I	0	0	0	0.0550014	0	0	0	0	0	0	0.0435682	0	0	0
GPR141_p.E267K	0	0	0	0	0	0.119501	0	0	0	0	0	0	0.040596	0
GPR141_p.Q224K	0	0	0	0	0	0.0500155	0	0	0	0	0	0	0	0.0303962
GPR141_p.T6N	0	0	0	0	0	0.666506	0	0	0	0	0	0	0	0.762403
GPR156_p.C763S	0	0	0	0	0	2.60163	0	0	0	0	0	0	1.84831	0
GPR156_p.R757L	0	0	0	0	0	3.40449	0	0	0	0	0	0	2.18741	0
GPS2_p.R102Q	0	5.69976	0	0	0	0	0	0	5.43802	0	0	0	0	0
GZMA_p.G210E	0	0	0	0	0	1.53645	0	0	0	0	0	0	0	1.97911
GZMA_p.H38N	0	0	0	0	0	1.36576	0	0	0	0	0	0	3.27156	0
H2AFX_p.K134N	0	0	1.35296	0	0	0	0	0	1.28474	0	0	0	0	0
HAPLN1_p.K115N	0	0	0	0	0	0.217261	0	0	0	0	0	0	0	0.221693
HAPLN1_p.P233H	0	0	0	0	0	0.268171	0	0	0	0	0	0	0	0.287194
HAPLN1_p.S326N	0	0	0	0	0	0.305046	0	0	0	0	0	0	0	0.259581
HAUS1_p.A102V	0	0	0	0	0	4.16422	0	0	0	0	0	4.57507	0	0
HcRed	1.79667	1.72561	2.62521	2.517	3.26561	2.62454	2.31905	1.5733	2.49254	5.81188	0	0	0	9.51009
HERPUD2_p.P46L	0	0	0	0	0	4.91899	0	0	0	0	0	5.66349	0	0
HERPUD2_p.R285Q	0	0	0	0	0	1.19225	0	0	0	0	0	0	2.19457	0
HIST1H1E_p.A60D	0	0	0	0	0	2.10918	0	0	0	0	0	2.36173	0	0
HIST1H3B_p.A48S	0	0	1.89177	0	0	0	0	0	1.87974	0	0	0	0	0
HIST1H3B_p.L101W	0	2.04291	0	0	0	0	0	0	0	2.66788	0	0	0	0
HRAS_p.A11D	0	0	0	1.69103	0	0	0	0	0	0	1.03189	0	0	0
HRAS_p.A59T	1.38968	0	0	0	0	0	0	1.41307	0	0	0	0	0	0
HRAS_p.G12A	1.99039	0	0	0	0	0	0	2.14854	0	0	0	0	0	0
HRAS_p.G12C	3.01239	0	0	0	0	0	0	2.64184	0	0	0	0	0	0
HRAS_p.G12D	3.04612	0	0	0	0	0	0	2.4478	0	0	0	0	0	0
HRAS_p.Q61K	2.13379	0	0	0	0	0	0	1.76003	0	0	0	0	0	0
HRAS_p.Q61L	2.49256	0	0	0	0	0	0	1.91454	0	0	0	0	0	0
HRAS_p.Q61R	2.6126	0	0	0	0	0	0	2.66025	0	0	0	0	0	0
HRH4_p.S115L	0	0	0	0	1.88151	0	0	0	0	0	0	2.41454	0	0
HRH4_p.S170L	0	2.51814	0	0	0	0	0	0	3.63589	0	0	0	0	0
HTR3B_p.I118T	0	0	0	0	0	0.0176809	0	0	0	0	0	0	0	0
HTR3B_p.W95C	0	0	0	0	0	0.00509098	0	0	0	0	0	0.000640015	0	0
HTR4_p.T105M	0	0	0.247241	0	0	0	0	0	0	0.25703	0	0	0	0
HTR4_p.Y129H	0	0	0.0473632	0	0	0	0	0	0	0	0.0208913	0	0	0
IDH1_p.E190K	0	0	0	4.44977	0	0	0	0	0	4.08653	0	0	0	0
IDH1_p.P33S	0.956467	0	0	0	0	0	0	0.867697	0	0	0	0	0	0
IDH1_p.R132C	0.144202	0	0	0	0	0	0	0.141608	0	0	0	0	0	0
IDH1_p.R132H	1.37745	0	0	0	0	0	0	1.43556	0	0	0	0	0	0
IDH1_p.R132L	0.157389	0	0	0	0	0	0	0.164744	0	0	0	0	0	0
IDH1_p.R132S	0.0863201	0	0	0	0	0	0	0.088675	0	0	0	0	0	0
IDH2_p.A416V	0	0	0	0.52648	0	0	0	0	0.592146	0	0	0	0	0
IDH2_p.A47V	0	0	0	1.29978	0	0	0	0	0	0	1.18991	0	0	0
IDH2_p.E268D	0	0	0	0	2.22482	0	0	0	0	0	0	0	0	3.02692
IDH2_p.G137E	0	0	2.46655	0	0	0	0	0	0	2.65173	0	0	0	0
IDH2_p.I139F	0	0.956113	0	0	0	0	0	0	0	0	1.23053	0	0	0
IDH2_p.R172K	0.121704	0	0	0	0	0	0	0.106725	0	0	0	0	0	0
IDH2_p.R172M	0.0205859	0	0	0	0	0	0	0.017692	0	0	0	0	0	0
IDH2_p.T331M	0	0	0.186415	0	0	0	0	0	0	0.143721	0	0	0	0
IER3_p.A155T	0	3.4836	0	0	0	0	0	0	4.64093	0	0	0	0	0
IKZF5_p.E135K	0	0	0	0	0	3.73967	0	0	0	0	0	0	1.71936	0
ILKAP_p.S61Y	0	0	0.556414	0	0	0	0	0	0	0.486349	0	0	0	0
IRF4_p.K123R	0	0	0	0	0.0285825	0	0	0	0	0	0	0	0	0.0317519
IRF4_p.R96L	0	0	0.204642	0	0	0	0	0	0	0	0.144409	0	0	0
ISX_p.R86C	0	0	0	0	0	2.18493	0	0	0	0	0	0	0	1.86081
ISX_p.T87A	0	0	0	0	0	2.19724	0	0	0	0	0	0	1.5522	0
JMJD5_p.A230T	0	0	0	0	4.46323	0	0	0	0	0	0	3.59536	0	0
KEAP1_p.E611D	0	0	0	2.43413	0	0	0	0	0	2.34286	0	0	0	0
KEAP1_p.G419W	0	0	0	2.57285	0	0	0	0	2.71416	0	0	0	0	0
KEAP1_p.G603W	0	0	2.95136	0	0	0	0	0	1.96042	0	0	0	0	0
KEAP1_p.P318L	0	1.26442	0	0	0	0	0	0	1.05252	0	0	0	0	0
KEAP1_p.R470H	0	0	1.75285	0	0	0	0	0	0	0	1.79201	0	0	0
KEAP1_p.S45F	0	0.569142	0	0	0	0	0	0	0	0.638054	0	0	0	0
KEAP1_p.T142M	0	0	0.832101	0	0	0	0	0	0	0	0.859891	0	0	0
KIF2B_p.E161G	0	0	0.194079	0	0	0	0	0	0.152131	0	0	0	0	0
KIF2B_p.E211K	0	0	0	0.401034	0	0	0	0	0	0.329067	0	0	0	0
KIF2B_p.G450V	0	0.778274	0	0	0	0	0	0	1.38278	0	0	0	0	0
KIF2B_p.I119T	0	0	0	0.880604	0	0	0	0	0.635419	0	0	0	0	0
KIF2B_p.Q430H	0	0	0	0.648699	0	0	0	0	0	0.802558	0	0	0	0
KIF2B_p.R504Q	0	0	0	0	1.15746	0	0	0	0	0	0	0	1.61429	0
KIF2B_p.T113M	0	0	0.669022	0	0	0	0	0	0	0	0.504873	0	0	0
KIF2B_p.W60L	0	0	1.48227	0	0	0	0	0	1.56886	0	0	0	0	0
KIR3DL2_p.R96Q	0	0	0	0	0	0.169378	0	0	0	0	0	0	0	0.166038
KLRC2_p.G174R	0	0	0	0	0	2.05669	0	0	0	0	0	1.78756	0	0
KPNA3_p.V154G	0	0	0	0	0	1.55942	0	0	0	0	0	1.31475	0	0
KRAS_p.A59G	0	0.80527	0	0	0	0	0	0	0	1.39482	0	0	0	0
KRAS_p.D33E	0	0	0	0	4.04347	0	0	0	0	0	0	0	1.98204	0
KRAS_p.E62K	0	0.738997	0	0	0	0	0	0	0	0.700228	0	0	0	0
KRAS_p.G12A	0.353333	0	0	0	0	0	0	0.408492	0	0	0	0	0	0
KRAS_p.G12C	1.26012	0	0	0	0	0	0	1.6551	0	0	0	0	0	0
KRAS_p.G12D	1.04183	0	0	0	0	0	0	1.24718	0	0	0	0	0	0
KRAS_p.G12S	1.67889	0	0	0	0	0	0	1.63519	0	0	0	0	0	0
KRAS_p.G12V	0.939152	0	0	0	0	0	0	1.29531	0	0	0	0	0	0
KRT26_p.S2C	0	0	0	0	0	3.85621	0	0	0	0	0	0	0	3.77298
LacZ	0.112392	0.0697822	0.056753	0.24904	0.265906	0.206804	0.364854	0.0427617	0.0931567	0	0.251901	0.496332	0.39402	0
LCE1B_p.G102C	0	0	0	0	0	1.449	0	0	0	0	0	1.44315	0	0
LCE1B_p.S42F	0	0	0	0	0	1.01262	0	0	0	0	0	0	0.647149	0
LNX1_p.V564I	0	0	0	0	0	6.64807	0	0	0	0	0	5.89518	0	0
LUCIFERASE	0.0672441	0.71866	0	0.732523	0.910972	0.749544	0.978761	0.0828016	0	2.20783	0	0.676656	0	2.06637
MAGEC2_p.D15N	0	0	0	2.90254	0	0	0	0	0	0	2.34264	0	0	0
MAGEC2_p.E269K	0	0	0	2.38844	0	0	0	0	0	0	0.902701	0	0	0
MAGEC2_p.G74V	0	0	0	0.0679585	0	0	0	0	0	0.0806081	0	0	0	0
MAGEC2_p.R287W	0	0.868715	0	0	0	0	0	0	0	1.48594	0	0	0	0
MAGEC2_p.S85I	0	0	1.29434	0	0	0	0	0	1.44611	0	0	0	0	0
MAP2K1_p.C121S	0	0	0.817533	0	0	0	0	0	0	0.561967	0	0	0	0
MAP2K1_p.E203K	1.31101	0	0	0	0	0	0	1.52395	0	0	0	0	0	0
MAP2K1_p.K57T	0	0	0	1.861	0	0	0	0	0	1.98538	0	0	0	0
MAP2K1_p.L177M	0	0	5.10514	0	0	0	0	0	0	0	3.27757	0	0	0
MAP2K1_p.P124S	1.29933	0	0	0	0	0	0	1.10744	0	0	0	0	0	0
MAP2K1_p.S327T	0	0.159292	0	0	0	0	0	0	0	0.342335	0	0	0	0
MAP2K4_p.S184L	0.734702	0	0	0	0	0	0	0.537136	0	0	0	0	0	0
MAP2K5_p.P111S	0	0	0	0	0	4.1129	0	0	0	0	0	0	2.99694	0
MAP4K3_p.L536I	0	0	0	0	0	0	0	0	0	0	0	0	0	0
MAP4K3_p.Q473H	0	0	0	0	0	0	0	0	0	0	0	0	0	0
MAP4K3_p.R753Q	0	0	0	0	0	0	0	0	0	0	0	0	0	0
MAPK6_p.D387N	0	0	3.48085	0	0	0	0	0	0	0	1.87682	0	0	0
MEF2C_p.T9M	0	0	0	0.163841	0	0	0	0	0	0.163154	0	0	0	0
MET_p.R469Q	0	0	0	0	0.106678	0	0	0	0	0	0	0	0	0.179238
MET_p.S213L	0	0	0	0	0.0252942	0	0	0	0	0	0	0	0	0.0636465
MET_p.T263M	0	0.0225566	0	0	0	0	0	0	0	0	0.0240161	0	0	0
MFAP4_p.Y55S	0	0	0	0	0	0.107048	0	0	0	0	0	0	0	0.11552
MTM1_p.D298E	0	0	0	0	0	2.08125	0	0	0	0	0	0	0	0
MTM1_p.P226S	0	0	0	0	0	2.18101	0	0	0	0	0	0	2.67695	0
MTM1_p.R253Q	0	0	0	0	0	2.62509	0	0	0	0	0	2.77702	0	0
NBPF15_p.Y612C	0	0	0	1.65961	0	0	0	0	0	1.03129	0	0	0	0
NFE2L2	0.603435	0.217725	0.341139	0.278392	0.2826	0.167934	0.235618	0.699301	0.614684	0.3057	0	0.242086	1.79817	0
NFE2L2_p.G31A	0.0158044	0	0	0	0	0	0	0.0251413	0	0	0	0	0	0
NFE2L2_p.G31R	0	0	0	0.00893773	0	0	0	0	0.0140486	0	0	0	0	0
NFE2L2_p.G31V	0	0	0	0	0.00202354	0	0	0	0	0	0	0	0.004776	0
NFE2L2_p.N160S	0	0	0	0	0.0613385	0	0	0	0	0	0	0	0.1194	0
NFE2L2_p.T80K	0.0145461	0	0	0	0	0	0	0.01232	0	0	0	0	0	0
NFKBIA	0.343166	1.15153	0.785704	0.382365	0.246745	0.466651	0.577917	0.269893	0	0.843303	2.38589	0.748257	0.26268	0
NFKBIA_p.P137S	0	0	0.52065	0	0	0	0	0	0.376533	0	0	0	0	0
NRAS_p.G12A	0.989334	0	0	0	0	0	0	1.12169	0	0	0	0	0	0
NRAS_p.G12C	2.32601	0	0	0	0	0	0	2.99969	0	0	0	0	0	0
NRAS_p.Q61H	1.08894	0	0	0	0	0	0	1.39523	0	0	0	0	0	0
NRAS_p.Q61K	6.52152	0	0	0	0	0	0	7.08175	0	0	0	0	0	0
NRAS_p.Q61L	5.38396	0	0	0	0	0	0	6.41956	0	0	0	0	0	0
NRAS_p.Q61R	6.284	0	0	0	0	0	0	7.85111	0	0	0	0	0	0
NRAS_p.Y64D	0	0	0.276999	0	0	0	0	0	0	0.205424	0	0	0	0
OMA1_p.P177S	0	0	0	0	0	0.0445805	0	0	0	0	0	0	0	0.0696402
OR2G6_p.I177F	0	0	0	0	0	0.00116955	0	0	0	0	0	0.00312007	0	0
OR2G6_p.K236M	0	0	0	0	0	0.0974167	0	0	0	0	0	0	0.0620881	0
OR2G6_p.N294Y	0	0	0	0	0	0.103677	0	0	0	0	0	0	0.03582	0
OR2G6_p.N42S	0	0	0	0	0	0.136425	0	0	0	0	0	0	0	0.120443
OR2G6_p.R265K	0	0	0	0	0	0.129545	0	0	0	0	0	0	0	0.157547
OR2G6_p.W149C	0	0	0	0	0	0.129476	0	0	0	0	0	0.302727	0	0
OR2M2_p.E232V	0	0	0	0	0	0.00103196	0	0	0	0	0	8e-05	0	0
OR2M2_p.N42Y	0	0	0	0	0	0.00288948	0	0	0	0	0	0	0	0.00627903
OR2M2_p.P182S	0	0	0	0	0	0.00818685	0	0	0	0	0	0.00088002	0	0
OR2M2_p.V117I	0	0	0	0	0	0.00392143	0	0	0	0	0	0	0	0
OR2T33_p.F164V	0	0	0	0	0	0	0.304524	0	0	0	0	0.258486	0	0
OR2T33_p.L60P	0	0	0	0	0	0.314403	0	0	0	0	0	0.345928	0	0
OR2T33_p.P285L	0	0	0	0	0	0	0.118776	0	0	0	0	0	0.0883561	0
OR2T33_p.R120S	0	0	0	0	0	0.104984	0	0	0	0	0	0	0	0.158617
OR2T33_p.W147C	0	0	0	0	0	0	0.211576	0	0	0	0	0.284647	0	0
OR2T33_p.W49L	0	0	0	0	0	0.285439	0	0	0	0	0	0	0	0.328936
OTUD6A_p.R171P	0	0	0	0	0	0	2.11491	0	0	0	0	1.84556	0	0
OTUD6A_p.V211M	0	0	0	0	0	0	0.00039658	0	0	0	0	0	0	0
PDZD11_p.R133H	0	0	0	0	0	0	1.14448	0	0	0	0	0	0.496705	0
PEX3_p.G173E	0	0	0	0	0	0	0.0431281	0	0	0	0	0	1.04595	0
PIK3CA_p.D1045V	0	1.55504	0	0	0	0	0	0	0	3.15781	0	0	0	0
PIK3CA_p.H1047Y	0.924908	0	0	0	0	0	0	1.10421	0	0	0	0	0	0
PIK3CB_p.A1048V	0	0	0	4.70881	0	0	0	0	0	4.22297	0	0	0	0
PIK3CB_p.A593V	0	1.48974	0	0	0	0	0	0	0	2.29906	0	0	0	0
PIK3CB_p.E497D	0	0	3.27669	0	0	0	0	0	3.08033	0	0	0	0	0
PIK3CG_p.K973R	0	2.40006	0	0	0	0	0	0	0	0	2.20859	0	0	0
PIK3CG_p.V168M	0	0	4.93882	0	0	0	0	0	3.41036	0	0	0	0	0
PIK3CG_p.W212C	0	0	2.85001	0	0	0	0	0	2.65654	0	0	0	0	0
PIK3IP1_p.G185E	0	0	0	3.86945	0	0	0	0	4.0726	0	0	0	0	0
PIK3R3_p.R383C	0	0	0	1.22442	0	0	0	0	1.19834	0	0	0	0	0
PIK3R4_p.E1209K	0	0	0	0	0	0	2.54991	0	0	0	0	3.60408	0	0
PIK3R4_p.N870T	0	0	0	0	0	0	1.2121	0	0	0	0	0	3.46977	0
PIK3R4_p.R998Q	0	0	0	0	0	0	3.19877	0	0	0	0	0	0	2.66866
POT1_p.G76V	0	0	0	4.7399	0	0	0	0	4.87405	0	0	0	0	0
POT1_p.L265H	0	0	2.37009	0	0	0	0	0	0	1.8315	0	0	0	0
POT1_p.L388M	0	0	0	3.0109	0	0	0	0	0	0	2.21265	0	0	0
PPIAL4G_p.N35H	0	0	0	0	0	0	1.12098	0	0	0	0	0	1.27997	0
PPP2R1A_p.R258H	0.311608	0	0	0	0	0	0	0.119976	0	0	0	0	0	0
PPP2R1A_p.S143F	0	0	0	0	0.922165	0	0	0	0	0	0	1.62444	0	0
PPP6C_p.E180K	0	0	0	0	3.00837	0	0	0	0	0	0	2.47254	0	0
PPP6C_p.R264C	0	0	0	1.18338	0	0	0	0	1.22741	0	0	0	0	0
PRR23B_p.A246T	0	0	0	0	0	0	0	0	0	0	0	0	0	0
PRR23B_p.E140K	0	0	0	0	0	0	0.000793161	0	0	0	0	0.00216005	0	0
PRR23B_p.H245Q	0	0	0	0	0	0	0.0010906	0	0	0	0	0	0	0
PSG2_p.H245Y	0	0	0	0	0	0	0.316868	0	0	0	0	0.42137	0	0
PSG2_p.S265C	0	0	0	0	0	0	5.41803	0	0	0	0	4.53451	0	0
PTEN_p.F90S	0	0.248051	0	0	0	0	0	0	0	0.442493	0	0	0	0
PTEN_p.G127R	2.63168	0	0	0	0	0	0	1.79943	0	0	0	0	0	0
PTEN_p.G127V	0	0	0	3.42759	0	0	0	0	0	0	2.15546	0	0	0
PTEN_p.G129E	1.46492	0	0	0	0	0	0	1.78553	0	0	0	0	0	0
PTEN_p.G129V	0	1.21483	0	0	0	0	0	0	1.25972	0	0	0	0	0
PTEN_p.K6N	0	0	0.0500559	0	0	0	0	0	0.0372627	0	0	0	0	0
PTEN_p.R173H	0.458981	0	0	0	0	0	0	0.348683	0	0	0	0	0	0
PTEN_p.R233Q	0	0	0.243375	0	0	0	0	0	0.1933	0	0	0	0	0
PTPN12_p.E57D	0	0	0.269266	0	0	0	0	0	0	0.321376	0	0	0	0
PTPN12_p.E5G	0	0.119514	0	0	0	0	0	0	0	0	0.124767	0	0	0
PTPN12_p.G99R	0	0.173542	0	0	0	0	0	0	0.0401926	0	0	0	0	0
RAB42_p.A61T	0	0	0	0	0	0	1.02714	0	0	0	0	0	0	0.46265
RAC1_p.P29S	0.00523457	0	0	0	0	0	0	0.0320892	0	0	0	0	0	0
RASA1_p.E510K	0	0	0	0.20451	0	0	0	0	0	0	0.187129	0	0	0
RASA1_p.L146S	0	0.31769	0	0	0	0	0	0	0.296449	0	0	0	0	0
RASA1_p.R194C	0	0.629042	0	0	0	0	0	0	0	0	0.707046	0	0	0
RASA1_p.R913Q	0	0	1.12595	0	0	0	0	0	0	0	1.23495	0	0	0
RB1_p.F755I	0	0	0	0.563764	0	0	0	0	0.439189	0	0	0	0	0
RB1_p.I782M	0	0.0909424	0	0	0	0	0	0	0.190971	0	0	0	0	0
RB1_p.L550I	0	0	0	0.284526	0	0	0	0	0	0.38848	0	0	0	0
RB1_p.R451H	0	0	0.491997	0	0	0	0	0	0.374655	0	0	0	0	0
RB1_p.V654L	0	0.0328682	0	0	0	0	0	0	0	0.0683965	0	0	0	0
RBM10_p.R171W	0	0.000966711	0	0	0	0	0	0	0	0	0.00263373	0	0	0
RBM11_p.R74C	0	0	0	0	0	0	1.82685	0	0	0	0	0	0.331932	0
REG1A_p.E80K	0	0	0	5.69619	0	0	0	0	0	5.1099	0	0	0	0
REG1A_p.P105T	0	0	1.0094	0	0	0	0	0	0.965148	0	0	0	0	0
REG1A_p.S131I	0	2.58917	0	0	0	0	0	0	0	0	3.14186	0	0	0
REG1B_p.A82T	0	0	0	0	0	0	2.30825	0	0	0	0	2.27245	0	0
REG1B_p.C64W	0	0	0	0	0	0	2.0648	0	0	0	0	0	4.00468	0
REG1B_p.K157T	0	0	0	0	0	0	6.5697	0	0	0	0	0	3.17604	0
REG1B_p.P30S	0	0	0	0	0	0	1.02784	0	0	0	0	0	0.556405	0
REG3A_p.G85R	0	0	0	0	0	0	3.52952	0	0	0	0	0	1.77667	0
REG3A_p.P109S	0	0	0	0	0	0	4.94164	0	0	0	0	0	0	6.55017
RHEB	0.2801	0.319587	0.429859	0.518758	0.76123	1.31526	1.34927	0.378337	0.420332	1.02049	0	0.523052	0.637597	0.6177
RHOA_p.E40Q	0	1.05687	0	0	0	0	0	0	0	0	1.68612	0	0	0
RHOA_p.F106L	0	0.768857	0	0	0	0	0	0	0	1.23807	0	0	0	0
RHOA_p.G62E	0	0	0.0419088	0	0	0	0	0	0	0.0267715	0	0	0	0
RHOA_p.R5Q	0	1.32174	0	0	0	0	0	0	0	0	1.84018	0	0	0
RHOA_p.S85F	0	1.42085	0	0	0	0	0	0	2.9708	0	0	0	0	0
RHOA_p.T175M	0	0	0.0660047	0	0	0	0	0	0.0477804	0	0	0	0	0
RHOA_p.Y42C	0	2.15824	0	0	0	0	0	0	1.97041	0	0	0	0	0
RHOA_p.Y42S	0	0	0	0.979289	0	0	0	0	0.772224	0	0	0	0	0
SAMHD1_p.D218H	0	0	0	0.589678	0	0	0	0	0.407035	0	0	0	0	0
SAMHD1_p.I515T	0	0	0.813252	0	0	0	0	0	0.795588	0	0	0	0	0
SCEL_p.S10Y	0	0	0	0	3.37558	0	0	0	0	0	0	2.95167	0	0
SERPINB4_p.A137E	0	0	0	0.677099	0	0	0	0	0	0	0.433628	0	0	0
SERPINB4_p.E110K	0	0.137488	0	0	0	0	0	0	0	0.165385	0	0	0	0
SERPINB4_p.E250K	0	0.220589	0	0	0	0	0	0	0	0.662889	0	0	0	0
SERPINB4_p.E290K	0	0	0	0	0.55407	0	0	0	0	0	0	0.376089	0	0
SERPINB4_p.F182I	0	0	0	2.07757	0	0	0	0	0	1.76381	0	0	0	0
SERPINB4_p.T347N	0	0.396924	0	0	0	0	0	0	0	1.29548	0	0	0	0
SGK1_p.A48G	0	0	3.68977	0	0	0	0	0	2.15605	0	0	0	0	0
SGK1_p.F27L	0	0	1.87457	0	0	0	0	0	0	0	0.639104	0	0	0
SLC2A3_p.F88S	0	1.45866	0	0	0	0	0	0	0	0	2.35246	0	0	0
SLC2A3_p.G109V	0	0	0	1.55717	0	0	0	0	0	0	2.21997	0	0	0
SLC2A3_p.K49N	0	2.11112	0	0	0	0	0	0	0	3.04162	0	0	0	0
SLC46A1_p.W299S	0	0	0	0	0	0	2.42747	0	0	0	0	1.94573	0	0
SMAD2_p.D304G	0	0	0	3.74216	0	0	0	0	0	0	1.74549	0	0	0
SMAD4_p.D537Y	0.987723	0	0	0	0	0	0	0.754884	0	0	0	0	0	0
SMAD4_p.E134K	0	0	0	0.672498	0	0	0	0	0.576069	0	0	0	0	0
SMAD4_p.K519N	0	0	0	1.4706	0	0	0	0	0	0	0.834491	0	0	0
SMAD4_p.R361H	1.21407	0	0	0	0	0	0	1.19919	0	0	0	0	0	0
SMAD4_p.R361P	0	0	0	0	0.531052	0	0	0	0	0	0	0	0	0.951559
SMAD4_p.R97H	0	0	1.10137	0	0	0	0	0	0	0	0.630489	0	0	0
SNURF_p.M1I	0	0	2.88826	0	0	0	0	0	0	0	1.61608	0	0	0
SPAG8_p.P344L	0	0	0	0	0	0	4.85241	0	0	0	0	0	0	5.14931
SPANXN4_p.P4Q	0	0	0	0	0	0	0.803819	0	0	0	0	0	0	1.14628
SPATA8_p.E18K	0	0	0	0	0	0	1.55355	0	0	0	0	0	0.37014	0
SPATA8_p.P83T	0	0	0	0	0	0	1.28309	0	0	0	0	0	0	1.3445
SPOP_p.E47A	0	0	0.0647619	0	0	0	0	0	0	0.0316444	0	0	0	0
SPOP_p.E50K	0	0.00465453	0	0	0	0	0	0	0.0153258	0	0	0	0	0
SPOP_p.F102C	0	0	0	0.299705	0	0	0	0	0	0.354018	0	0	0	0
SPOP_p.F133S	0	0.115719	0	0	0	0	0	0	0.0872968	0	0	0	0	0
SPOP_p.K101I	0	0	0	1.01948	0	0	0	0	0	0.716432	0	0	0	0
SPOP_p.K134N	0	0	0.0295502	0	0	0	0	0	0	0.041214	0	0	0	0
SPOP_p.W131C	0	0	0.377594	0	0	0	0	0	0	0.423647	0	0	0	0
SPOP_p.W131G	0	0	0.0724256	0	0	0	0	0	0	0.0806081	0	0	0	0
STAG2_p.E134D	0	0.500112	0	0	0	0	0	0	1.11946	0	0	0	0	0
STAG2_p.L997W	0	0.488619	0	0	0	0	0	0	0	0	0.610624	0	0	0
STAG2_p.P572S	0	0	0.0169845	0	0	0	0	0	0	0.0161451	0	0	0	0
STAG2_p.R252Q	0	0	0	0.96427	0	0	0	0	0.628807	0	0	0	0	0
STAG2_p.R541K	0	0	0	0	1.47971	0	0	0	0	0	0	0	2.06085	0
STAT6_p.D46N	0	0	0	0	0	0	0	0	0	0	0	0	0	0
STAT6_p.N417Y	0	0	2.32059	0	0	0	0	0	0	2.29014	0	0	0	0
STK11_p.D194Y	3.46705	0	0	0	0	0	0	3.39759	0	0	0	0	0	0
STK19_p.E88K	0	0	0	0	0	0	0.834009	0	0	0	0	0	1.30863	0
SV2C_p.G146S	0	0	0	0	0	0	0.184013	0	0	0	0	0	0	0.245025
SV2C_p.G630S	0	0	0	0	0	0	0.128443	0	0	0	0	0.123123	0	0
SV2C_p.M727I	0	0	0	0	0	0	0.236065	0	0	0	0	0	0.140892	0
SV2C_p.R121Q	0	0	0	0	0	0	0.0658819	0	0	0	0	0	0	0.0520874
SYCP1_p.D889N	0	0	0	0	0	0	1.96411	0	0	0	0	1.5682	0	0
SYCP1_p.E442K	0	0	0	0	0	0	3.47742	0	0	0	0	0	0	2.70512
SYCP1_p.E509K	0	0	0	0	0	0	2.15958	0	0	0	0	1.85332	0	0
SYCP1_p.E773K	0	0	0	0	0	0	2.64009	0	0	0	0	0	3.86618	0
TBL1XR1_p.L81V	0	0	0.658045	0	0	0	0	0	0	0.585275	0	0	0	0
TBL1XR1_p.R166Q	0	0	0	1.24858	0	0	0	0	0	0	2.04132	0	0	0
TBL1XR1_p.T349M	0	0	1.96688	0	0	0	0	0	0	1.35543	0	0	0	0
THEMIS_p.D240N	0	0	0	0	0	0	0.100285	0	0	0	0	0	0	0.075277
THEMIS_p.E503K	0	0	0	0	0	0	1.56565	0	0	0	0	0	0	1.73151
THEMIS_p.H366Q	0	0	0	0	0	0	1.5477	0	0	0	0	0	0	1.73722
THEMIS_p.P216S	0	0	0	0	0	0	0.68886	0	0	0	0	0	0.811921	0
THEMIS_p.R196I	0	0	0	0	0	0	4.3494	0	0	0	0	0	2.97306	0
TMPO_p.D185H	0	0	0	0	0	0	0.333425	0	0	0	0	0	0	0.386803
TNF_p.S157R	0	2.18931	0	0	0	0	0	0	0	0	5.39344	0	0	0
TNFRSF14_p.A102P	0	0	0	2.70512	0	0	0	0	0	2.31221	0	0	0	0
TP53_p.C176F	0.931904	0	0	0	0	0	0	0.779166	0	0	0	0	0	0
TP53_p.C275F	0.31347	0	0	0	0	0	0	0.249121	0	0	0	0	0	0
TP53_p.C275S	0.489785	0	0	0	0	0	0	0.432631	0	0	0	0	0	0
TP53_p.I195F	0.68739	0	0	0	0	0	0	0.732751	0	0	0	0	0	0
TP53_p.M246R	1.9234	0	0	0	0	0	0	2.01625	0	0	0	0	0	0
TP53_p.S215I	0.615968	0	0	0	0	0	0	0.698083	0	0	0	0	0	0
TRAF3_p.D463N	0	0.109382	0	0	0	0	0	0	0	0	0.142445	0	0	0
TRAF3_p.N312S	0	1.71348	0	0	0	0	0	0	0	0	2.04382	0	0	0
TRAT1_p.D40Y	0	0	0	0	0	0	0.0138803	0	0	0	0	0	0	0.0140565
TRAT1_p.E76K	0	0	0	0	0	0	1.46492	0	0	0	0	1.31651	0	0
TRIM55_p.E369G	0	0	0	0	0	0	2.10946	0	0	0	0	1.19811	0	0
TRIM55_p.R322H	0	0	0	0	0	0	4.56776	0	0	0	0	0	2.92292	0
TUBB_p.R359P	0	0	0	0	0	0	0.53112	0	0	0	0	0.41601	0	0
U2AF1_p.S34F	0.00739886	0	0	0	0	0	0	0.00487068	0	0	0	0	0	0
VHL_p.E186K	0	0	0	0	1.15399	0	0	0	0	0	0	0	0.628045	0
VHL_p.H115Y	1.88057	0	0	0	0	0	0	1.70015	0	0	0	0	0	0
VHL_p.L158V	0	2.04946	0	0	0	0	0	0	0	2.58322	0	0	0	0
VHL_p.R161P	2.42215	0	0	0	0	0	0	2.00135	0	0	0	0	0	0
VHL_p.S111N	1.06267	0	0	0	0	0	0	0.943193	0	0	0	0	0	0
VHL_p.V130F	2.49749	0	0	0	0	0	0	2.49565	0	0	0	0	0	0
WBSCR17_p.A398V	0	0	0	0	0	0	0.0511589	0	0	0	0	0.0816019	0	0
WBSCR17_p.D348N	0	0	0	0	0	0	0.0215145	0	0	0	0	0	0.00716401	0
WBSCR17_p.E289K	0	0	0	0	0	0	0.0121453	0	0	0	0	0	0	0
WBSCR17_p.E507K	0	0	0	0	0	0	0.0425333	0	0	0	0	0	0	0.0281129
WBSCR17_p.S194R	0	0	0	0	0	0	0.378189	0	0	0	0	0	0	0.403785
WIPI1_p.P139S	0	0.00415328	0	0	0	0	0	0	0.0302759	0	0	0	0	0
WISP2_p.R230L	0	0	0	2.15246	0	0	0	0	0	0	1.56399	0	0	0
WNK3_p.E417Q	0	0	0	0	0.217088	0	0	0	0	0	0	0.144883	0	0
WNK3_p.E537G	0	0	0	0.104873	0	0	0	0	0	0	0.10526	0	0	0
WNK3_p.S617F	0	0.0323669	0	0	0	0	0	0	0	0.0501379	0	0	0	0
WNK3_p.T237M	0	0	0.030862	0	0	0	0	0	0	0	0.0294621	0	0	0
WNK3_p.V488A	0	0	0	0.0923389	0	0	0	0	0	0.0584159	0	0	0	0
WNT2_p.V334M	0	0.331618	0	0	0	0	0	0	0.401851	0	0	0	0	0
XPO1_p.E571A	0	0	0	0	0	0	0	0	0	0	0	0	0	0
XPO1_p.E571K	0	0	0	0	0	0	0	0	0	0	0	0	0	0
XPO1_p.R553C	0	0	0.000828511	0	0	0	0	0	0	0	0	0	0	0
YTHDC1_p.E483Q	0	0	0	0	0	0	0	0	0	0	0	0	0	0
YTHDC1_p.R267Q	0	0	0	0	0	0	0	0	0	0	0	0	0	0
ZDHHC4_p.R174H	0	0	0	0	0	0	0.373529	0	0	0	0	0	0	0.400502
ZNF454_p.H462Y	0	0	0	0	0	0	3.91945	0	0	0	0	0	0	4.15279
ZNF454_p.P299L	0	0	0	0	0	0	1.09307	0	0	0	0	0	0	1.69206
ZNF454_p.R376I	0	0	0	0	0	0	1.40984	0	0	0	0	0	1.96055	0

## Sheet: pool1
Supplementary Table S4C: Tumor composition of Pool1
Mutation	P1M1_L	P1M1_T	P1M2_L	P1M2_R	P1M2_T	P1M3_R	P1M3_T	P1M4_L	P1M4_R	P1M4_T
AKT1_p.E17K	0.00145385	0	0.00261981	0	0.000547881	0.002749	0.0073843	0	0.00088179	0
BFP	0	0	0	9.089e-05	0.00087661	7.04872e-05	0.000194324	0.000117967	0.00013566	0
BRAF_p.G466A	0	0.214646	0.534753	0	0	0.00267851	0	0	6.783e-05	0
BRAF_p.G466E	0	0	0.00068614	0.00081801	0.000383517	0.000352436	0.00148982	0	0.00183141	0
BRAF_p.G466V	0	0.00191946	0.00162179	0.000590785	0.00164364	0.0011278	0.00220234	0	0	0
BRAF_p.L597Q	0	0	0	0	0	0.00190315	0	0.00294917	0.00169575	0
BRAF_p.N581S	0	8.3455e-05	0.00748517	0	0	0.0011278	6.47746e-05	0	0	0
BRAF_p.V600E	0	0	0	0	0	0	0	0	0	0
CTNNB1_p.G34E	0	0	0	0	0	0	0	0	0	0
CTNNB1_p.G34R	0	0	0	0.000318115	0	0	0	0	0	0
CTNNB1_p.G34V	0	0	0	0	0	0	0	0	0	0
CTNNB1_p.H36Y	0.00172309	0	0	0.00027267	0	0	0.00103639	0	0	0
CTNNB1_p.I35S	0	0	0	0	0	0	0	0	0	0
DNMT3A	0.000215386	0.00191946	0.000124753	4.5445e-05	0.000109576	7.04872e-05	0.00265576	0.00017695	0.00013566	0
eGFP	0.00500772	8.3455e-05	0.000249506	0.00072712	5.47881e-05	0.000281949	0.00168414	0.00053085	0.00081396	0.000724079
EGFR_p.A289V	0	0	0.00143466	0	5.47881e-05	0.00704872	0.00699566	0	0	0
EGFR_p.G719D	5.38465e-05	8.3455e-05	0.00773467	0.00618052	0	0.00359485	0.00718998	0.000589833	0.00149226	0
ERBB2_p.V842I	0	0	0	0	5.47881e-05	0.000211462	0.004599	0	0	0
FBXW7_p.R465C	0.00376925	0.00225328	0.00417922	0.00227225	5.47881e-05	0.00486362	0.0141856	0	0.00162792	0
FGFR2_p.P253R	5.38465e-05	0	0	0	0	0	6.47746e-05	0	0	0
FGFR2_p.R251Q	0	0	0	0	0	0	0	0	0	0
HcRed	0.000161539	0	0.00118515	4.5445e-05	0	0.000211462	6.47746e-05	0	0.00013566	0
HRAS_p.A59T	0	0	0	0	0.000383517	0	0	0	0	0
HRAS_p.G12A	0.241501	0.680158	0.768914	0.363378	0.312785	0.547051	1.39304	0.609828	0.279527	1.97529
HRAS_p.G12C	0.00242309	0	0	0.000590785	5.47881e-05	0	0.000453422	0.00112068	6.783e-05	0
HRAS_p.G12D	0	0	0	0.00231769	0.000328729	0.000775359	0.00446945	0.00312612	6.783e-05	0
HRAS_p.Q61K	0	0	0	0	0	0.0021851	0	0	0	0.000362039
HRAS_p.Q61L	5.38465e-05	0	0.0013099	0.00063623	0	0.000281949	0.000453422	0	6.783e-05	0
HRAS_p.Q61R	0.000753851	0.00033382	0.00224555	4.5445e-05	0	0.00260803	0.00194324	0.000117967	0	0.000362039
IDH1_p.P33S	5.38465e-05	0	0	0	0	7.04872e-05	6.47746e-05	0.00188747	0	0
IDH1_p.R132C	0	0	0	4.5445e-05	0	0	0	0	0	0
IDH1_p.R132H	0	0	0.000187129	0.00149968	5.47881e-05	0	0.000388648	0	0	0
IDH1_p.R132L	0	0	0	0	0	0	0	0	6.783e-05	0
IDH1_p.R132S	0	0	0	0	0	0	0	0	0	0
IDH2_p.R172K	0.0845928	0.0341331	0.100301	0.0715758	0.0585685	0.0869812	0.132594	0.0946092	0.0691866	0.123093
IDH2_p.R172M	0	0	0	0	0	0	0	0	0	0
KRAS_p.G12A	0.0658542	0.0433966	0.0129119	0.016133	0.00953313	0.0523015	0.0411319	0.0974404	0.0539927	0.0231705
KRAS_p.G12C	1.31811	1.16754	0.735043	0.909672	0.756021	1.34905	0.653835	1.05132	0.733039	0.590124
KRAS_p.G12D	19.4936	12.9699	14.7339	14.7158	7.84045	12.8342	10.7815	9.11646	10.3971	6.87151
KRAS_p.G12S	0.510465	0.488629	0.328848	0.274624	0.336344	0.545853	0.844078	0.514688	0.541962	0.321129
KRAS_p.G12V	2.22558	4.19829	2.12485	1.89665	1.97917	2.10144	2.23608	2.15324	2.26878	1.73996
LacZ	0.000269232	0	0	0	0	0	0	0	0	0
LUCIFERASE	5.38465e-05	0	0	0	0	0	0.00148982	5.89833e-05	6.783e-05	0
MAP2K1_p.E203K	0	0	0	0	0	0.000140974	0	0	0	0
MAP2K1_p.P124S	0	0	0.015407	0	0	0	0	0	6.783e-05	0
MAP2K4_p.S184L	0	0	0	0.00227225	0	0.000140974	0.000647746	0	0	0
NFE2L2	0.00129232	0.00175255	0.00243268	0.0143152	0.00158885	0.00422923	0.00200801	0.00171052	0.00318801	0.00398243
NFE2L2_p.G31A	5.38465e-05	0.0195285	0	0.00045445	0.000986186	0.00239657	0.00472855	0.00430578	0	0
NFE2L2_p.T80K	0	0	0	0	0	0	0	0	0	0
NFKBIA	0.00118462	0	0	0	0	0.000140974	0.00136027	0	6.783e-05	0
NRAS_p.G12A	0.0182001	0.0124348	0.0175901	0.0113612	0.0118342	0.0238247	0.0159993	0.0150407	0.00556206	0
NRAS_p.G12C	3.71223	3.00513	1.82326	21.6237	1.48465	3.93565	1.45756	1.8437	4.84727	1.69434
NRAS_p.Q61H	0.624834	0.614562	0.440939	0.283758	0.343686	0.399169	0.785975	0.654066	0.500585	0.47753
NRAS_p.Q61K	36.1882	43.6205	33.7293	26.1758	49.016	39.4799	39.3935	39.0572	33.0228	43.7021
NRAS_p.Q61L	11.0504	12.0916	16.7071	17.9638	14.9952	16.5195	16.4371	16.6526	16.3194	14.6427
NRAS_p.Q61R	24.4085	20.8127	27.8528	15.6538	22.8432	22.071	25.7252	28.0367	30.9468	27.8028
PIK3CA_p.H1047Y	0.000969236	0	0	0.00204502	0.00087661	0	0.0033035	0.0750857	0	0
PPP2R1A_p.R258H	0	0	0	0	0	0	0	0	0	0
PTEN_p.G127R	0	0	0.000436635	0.00309026	0	0.000563898	0.00582971	5.89833e-05	0	0.000362039
PTEN_p.G129E	0	0	0.00180891	0	0.00312292	0	0	0	6.783e-05	0
PTEN_p.R173H	0	0	0	0	0	0	0	0	0	0
RAC1_p.P29S	0	0.0171917	0.032311	0	0	0	0	0	0	0
RHEB	0	0	0	9.089e-05	5.47881e-05	0	0	0.00182848	0.00013566	0
SMAD4_p.D537Y	0	8.3455e-05	0.00149703	0.00036356	0	0.00676677	0	0.00330307	0	0
SMAD4_p.R361H	0.0344079	0	0.00305644	0	5.47881e-05	0.00317192	0.00252621	0.000117967	0	0
STK11_p.D194Y	0.00166924	0	0.000810893	4.5445e-05	0	0.0011278	0.00544107	0.00312612	6.783e-05	0
TP53_p.C176F	0.000969236	0	0	0	0	0.000422923	0.00278531	0.00241832	0	0
TP53_p.C275F	0	0	0	0	5.47881e-05	0	0	0	0	0.0304113
TP53_p.C275S	0	0	0	0	0	0	0	0.000471866	0.00128877	0
TP53_p.I195F	0.000376925	0.00108491	0	0	0	0.000352436	0	0	0	0
TP53_p.M246R	0	0	0	0.000681675	0.00120534	0.00155072	0.00466377	0	0	0
TP53_p.S215I	0	0	0	0	0	0	0	0	0	0
U2AF1_p.S34F	0	0	0	0	0	0	0	0	0	0
VHL_p.H115Y	0.00091539	0	0	0	0	7.04872e-05	6.47746e-05	0	0	0
VHL_p.R161P	0	0	6.23764e-05	0	0	0	0.00200801	0	6.783e-05	0
VHL_p.S111N	0	0	0.000623764	0	0	0	0.00647746	0	0	0
VHL_p.V130F	5.38465e-05	8.3455e-05	0	4.5445e-05	0.000109576	0.000775359	0.00136027	0	0	0

## Sheet: pool2
Supplementary Table S4D: Tumor composition of Pool2
Mutation	P2M1_R	P2M2_L	P2M3_R
ACVR1B_p.E412D	0	0	0
AKT1_p.D44N	9.20767e-05	0	0
AKT1_p.E267G	0	0	8.63029e-05
AKT1_p.L52R	0.466369	0.00343266	99.8401
AKT1_p.R370C	0.0039593	5.36353e-05	0.000517817
B2M_p.C100S	0	0	0
B2M_p.M1R	0	0	8.63029e-05
BAP1_p.N299S	0	0	0
BFP	0	0	0.000172606
CHD2_p.E412K	0.000184153	0	8.63029e-05
CHD2_p.P474R	9.20767e-05	0	0.00483296
CTCF_p.N568K	0	0	0
CTCF_p.R377C	0	0	0
CTNNB1_p.T257I	0	0	0
DNAJC12_p.R178C	0	0	0
DNMT3A	0	0	8.63029e-05
DNMT3A_p.A910V	0	0	0
eGFP	9.20767e-05	0.000160906	0
EGFR_p.P622S	0.00423553	0	0
FBXO15_p.S366G	0	0	0.000172606
FBXW7_p.R465H	0.0039593	0.000107271	0.00345211
FBXW7_p.R505C	0.000368307	0.000160906	0.137998
FGF1_p.G44C	0	0.000107271	0
FGFR2_p.P253L	0	0	0
GATA3_p.R330K	0	0	0
GATA3_p.S140F	0.000184153	0	0.00103563
GPS2_p.R102Q	0	5.36353e-05	0
HcRed	9.20767e-05	0	8.63029e-05
HIST1H3B_p.L101W	0	0	0
HRH4_p.S170L	0	0	8.63029e-05
IDH2_p.I139F	9.20767e-05	0	0
IER3_p.A155T	0	5.36353e-05	0
KEAP1_p.P318L	0	0.000214541	8.63029e-05
KEAP1_p.S45F	0	0	0
KIF2B_p.G450V	0	0	0
KRAS_p.A59G	99.5173	99.9938	0.0091481
KRAS_p.E62K	0	5.36353e-05	0
LacZ	0	0	0
LUCIFERASE	0	0	0
MAGEC2_p.R287W	0	0.000107271	0
MAP2K1_p.S327T	0	0	0
MAP4K3_p.L536I	0	0	0
MET_p.T263M	0	0	0
NFE2L2	0.00285438	0.00123361	0.00155345
NFKBIA	0	0	8.63029e-05
PIK3CA_p.D1045V	0	5.36353e-05	8.63029e-05
PIK3CB_p.A593V	0	0	0
PIK3CG_p.K973R	0	5.36353e-05	0
PTEN_p.F90S	0	0	0
PTEN_p.G129V	0	0	0
PTPN12_p.E5G	0	0	0
PTPN12_p.G99R	0	0	0
RASA1_p.L146S	0	0	0
RASA1_p.R194C	9.20767e-05	0	0
RB1_p.I782M	0	0	0
RB1_p.V654L	0	0	0
RBM10_p.R171W	0	0	0
REG1A_p.S131I	0	0	0
RHEB	0	0	0
RHOA_p.E40Q	0	0	8.63029e-05
RHOA_p.F106L	0	0	0
RHOA_p.R5Q	0	0	0
RHOA_p.S85F	0	0	0
RHOA_p.Y42C	0	0	0
SERPINB4_p.E110K	0	0	0
SERPINB4_p.E250K	0	0	0
SERPINB4_p.T347N	0	0	0
SLC2A3_p.F88S	0	0	0
SLC2A3_p.K49N	0	5.36353e-05	0
SPOP_p.E50K	0	0	0
SPOP_p.F133S	0	0	0
STAG2_p.E134D	0	0	0
STAG2_p.L997W	0	5.36353e-05	8.63029e-05
STAT6_p.D46N	0	0	0
TNF_p.S157R	0	0.000107271	8.63029e-05
TRAF3_p.D463N	0	0	0
TRAF3_p.N312S	0	0.000107271	0
VHL_p.L158V	0	0	0
WIPI1_p.P139S	0	0	0
WNK3_p.S617F	0	0	0
WNT2_p.V334M	0	5.36353e-05	0

## Sheet: pool3
Supplementary Table S4E: Tumor composition of Pool3
Mutation	P3M1_L	P3M2_R	P3M3_L
ADORA2A_p.R220W	0	0	0
AKT1_p.Q79K	99.9905	4.95628	99.9567
ARSI_p.V373M	0	0	0
B2M_p.M1I	0	0	5.60933e-05
B2M_p.M1L	0	0	0
B2M_p.M1V	0	0	0
B2M_p.Y30H	0	0.0951183	0
BAP1_p.D75G	0	0.00598107	0
BCR_p.A426S	0	0	0
BFP	5.50548e-05	0.000192938	5.60933e-05
CBFB_p.R151H	0	0	0
CCNG1_p.E167K	0	4.3355	0
CD79B_p.H194N	0	0	0
CDK4_p.A23S	0.00137637	0.0222843	0
CHD2_p.E287Q	0	0	0
CHD2_p.P195L	0	0.0313524	0
CTNNB1_p.D162E	0	0	0
CYP3A5_p.D336N	0	9.64689e-05	0
DNMT3A	5.50548e-05	4.1416	5.60933e-05
DNMT3A_p.G746V	0	0	0
DNMT3A_p.Q485H	0	10.7368	0
EDNRB_p.L349I	0	0.261527	0
eGFP	0.00011011	4.80646	5.60933e-05
FBXO15_p.E410K	0	0	0
FBXW7_p.A502V	0	0	0
FBXW7_p.I347M	0	0	0
FTH1_p.A161T	0	0	5.60933e-05
H2AFX_p.K134N	0	0	0
HcRed	0	9.64689e-05	0.000112187
HIST1H3B_p.A48S	0	0	0
HTR4_p.T105M	0	0	0
HTR4_p.Y129H	0	0	0
IDH2_p.G137E	0	0	0
IDH2_p.T331M	0	9.64689e-05	0
ILKAP_p.S61Y	0	0	0
IRF4_p.R96L	0	0	0
KEAP1_p.G603W	0	0.00482344	0
KEAP1_p.R470H	0	0	0
KEAP1_p.T142M	0	0.0385875	0
KIF2B_p.E161G	0	0	0
KIF2B_p.T113M	0	0.044858	0
KIF2B_p.W60L	5.50548e-05	0.00665635	0
LacZ	0	0	0
MAGEC2_p.S85I	0	0	5.60933e-05
MAP2K1_p.C121S	0	0	0
MAP2K1_p.L177M	0.000165164	70.3669	0.000280466
MAPK6_p.D387N	5.50548e-05	0	5.60933e-05
NFE2L2	0.00715712	0.0825773	0.0178377
NFKBIA	0	0	5.60933e-05
NFKBIA_p.P137S	0	0	0
NRAS_p.Y64D	0	0	0
PIK3CB_p.E497D	0.000330329	0.0389734	0.000448746
PIK3CG_p.V168M	0	0.00684929	0
PIK3CG_p.W212C	0	0	0
POT1_p.L265H	5.50548e-05	0.000192938	5.60933e-05
PTEN_p.K6N	0	0	0
PTEN_p.R233Q	0	0	0
PTPN12_p.E57D	0	0	0
RASA1_p.R913Q	0	0	0
RB1_p.R451H	0	0	0
REG1A_p.P105T	0	0.00598107	0
RHEB	0	9.64689e-05	5.60933e-05
RHOA_p.G62E	0	0	0
RHOA_p.T175M	0	0	0
SAMHD1_p.I515T	0	0	0
SGK1_p.A48G	0	0	0
SGK1_p.F27L	0	9.64689e-05	5.60933e-05
SMAD4_p.R97H	0	0	0
SNURF_p.M1I	0	0	0
SPOP_p.E47A	0	0	0
SPOP_p.K134N	0	0	0
SPOP_p.W131C	0	0.0100328	0
SPOP_p.W131G	0	0	0
STAG2_p.P572S	0	0	0
STAT6_p.N417Y	5.50548e-05	0	0.0240079
TBL1XR1_p.L81V	0	0	0
TBL1XR1_p.T349M	0	0	0
WNK3_p.T237M	0	0	0
XPO1_p.R553C	0	0	0

## Sheet: pool4
Supplementary Table S4F: Tumor composition of Pool4
Mutation	P4M1_L	P4M1_R	P4M2_L	P4M2_R	P4M3_L	P4M3_T
ACVR1B_p.D335N	0	0	0	0	0	0
ACVR2A_p.A381V	0	0	0	0	0	0
AKT1_p.V201I	0	0	0	0	0	0
ARSI_p.P228L	0	0	0	0	0	0
B2M_p.A6V	0	0.00604439	0	0	0	0
B2M_p.D54N	0	4.25661e-05	0	0	0	0
BFP	0	8.51322e-05	8.10216e-05	4.84358e-05	0.000160925	6.08545e-05
CD3E_p.E189Q	0	0	0	0	0	0
CDKN1B_p.C29F	0	0	0	0	0	0
CTCF_p.R377H	0	0	0	0	8.04626e-05	0
CTNNB1_p.R535Q	0	0	0	0	0	0
DNMT3A	0	4.25661e-05	8.10216e-05	4.84358e-05	0	0.000121709
EDNRB_p.F292L	0	0	0	0	0	0
eGFP	0	8.51322e-05	0.000121532	0.000145307	8.04626e-05	6.08545e-05
ELF1_p.P32S	0	0	4.05108e-05	0	0	0
ERBB2_p.R897Q	26.209	0.000638492	0	0	0	6.08545e-05
ERBB2_p.T182I	0	41.0308	0.0183514	0.000290615	0.000241388	0.000182564
FBXW7_p.R658Q	0	0	0	0	0	0
FBXW7_p.R689Q	0	0	0	0	0	0
FBXW7_p.S462Y	0	0	0	0	0	0
FGFR2_p.G384E	0	0	0	0	0	0
FGFR2_p.R165W	0	0	0	0	8.04626e-05	6.08545e-05
GATA3_p.S118F	0.00275039	0	0	0	0	0
GNA13_p.L374I	0	0	0	0	0	0
HcRed	0.000250036	4.25661e-05	0	4.84358e-05	0.000321851	6.08545e-05
HRAS_p.A11D	0	0.0395439	0	0	0	0
IDH1_p.E190K	0	0	4.05108e-05	0	0	0
IDH2_p.A416V	0	0.000936454	0	0	0	6.08545e-05
IDH2_p.A47V	0	0	4.05108e-05	0	0	0
KEAP1_p.E611D	0	0	4.05108e-05	0	0	0
KEAP1_p.G419W	0.00125018	0	0	0	0	0
KIF2B_p.E211K	0	0.0136212	0.000931748	0	0	0
KIF2B_p.I119T	0	0	0	0	0	0
KIF2B_p.Q430H	0	0	0	0	0	0
LacZ	0	0	0	0	0	0
LUCIFERASE	0	4.25661e-05	0	0	0	0
MAGEC2_p.D15N	0	0	0	0	0	0
MAGEC2_p.E269K	0	0	4.05108e-05	0	0	0
MAGEC2_p.G74V	0	0	0	4.84358e-05	0	0
MAP2K1_p.K57T	0	26.1454	0.0120722	0.928272	8.04626e-05	0.000182564
MAP4K3_p.Q473H	0	0	0	0	0	0
MEF2C_p.T9M	0	0	0	0	0	0
NBPF15_p.Y612C	0	0.0145576	0	0	0	0
NFE2L2	0.00275039	0.803222	0.00202554	0.0109465	11.7477	0.00115624
NFE2L2_p.G31R	73.7688	29.0477	0.0600775	99.0543	88.1985	99.997
NFKBIA	0	4.25661e-05	0	4.84358e-05	0	0
PIK3CB_p.A1048V	0	2.53473	0.000931748	0	0	0
PIK3IP1_p.G185E	0	0	4.05108e-05	0	0	0
PIK3R3_p.R383C	0	0	0	0	0	6.08545e-05
POT1_p.G76V	0.000250036	0.000510793	99.9048	0.00566699	0.0329092	0.000851963
POT1_p.L388M	0	0	0	0	0	0
PPP6C_p.R264C	0	0	0	0	0	0
PTEN_p.G127V	0	4.25661e-05	0	0	0	0
RASA1_p.E510K	0	0	0	0	0	0
RB1_p.F755I	0	0	0	0	0	0
RB1_p.L550I	0	0	0	0	0	0
REG1A_p.E80K	0	0	0	0	8.04626e-05	6.08545e-05
RHEB	0	4.25661e-05	4.05108e-05	0	0	0
RHOA_p.Y42S	0	0	0	0	0	0
SAMHD1_p.D218H	0	0	0	0	0	0
SERPINB4_p.A137E	0	0.0940285	0.000162043	0	0	0
SERPINB4_p.F182I	0	0	0	0	8.04626e-05	0
SLC2A3_p.G109V	0	0	4.05108e-05	0	0	0
SMAD2_p.D304G	0.00825118	0.264123	4.05108e-05	0	0.0197133	0
SMAD4_p.E134K	0	0.00374582	0	0	0	0
SMAD4_p.K519N	0.00675096	0	4.05108e-05	0	0	0
SPOP_p.F102C	0	0	0	0	0	0
SPOP_p.K101I	0	0	0	0	0	0
STAG2_p.R252Q	0	0	0	0	0	0
TBL1XR1_p.R166Q	0	0	0	0	0	0
TNFRSF14_p.A102P	0	0	0	9.68716e-05	0	0
WISP2_p.R230L	0	0	0	0	0	0
WNK3_p.E537G	0	0	0	0	0	0
WNK3_p.V488A	0	0	0	0	0	0
XPO1_p.E571A	0	0	0	0	0	0

## Sheet: pool5
Supplementary Table S4G: Tumor composition of Pool5
Mutation	P5M1_L	P5M1_R	P5M1_T	P5M2_L	P5M2_R	P5M3_L	P5M3_R	P5M3_T	P5M4_T
A4GALT_p.A272V	0	0	0	0	0	0	0	0	0
ACTG1_p.A22P	0	0	0	0	0	0	0	0	0
ACTG1_p.K61E	0	0	0	0	0	0	0	0	0
ASCL4_p.T114M	0	2.90312e-05	8.21891e-05	0	0	0	0	0	0
BFP	0.000156321	8.70935e-05	4.10946e-05	5.16988e-05	0	0.000182115	0	0	0
BTC_p.P70S	0	2.90312e-05	8.21891e-05	0	0.00351088	0	0	0.000650984	2.539e-05
C15orf23_p.P26L	0	0	0	0	0	0	0	0.00488238	0
C15orf23_p.P26S	0	0	0	0	0.00263316	3.6423e-05	0	0.000325492	0
C19orf48_p.L70F	0	0	0	0	0	0	0	0	0
C1orf150_p.G2E	0	0	0	0	0	0	0	0	0
C1orf150_p.Y89N	0	0	0	0	0	3.6423e-05	9.32428e-05	0	0
C20orf72_p.P102S	0	0	0	0	0	0	0	0	0
CD70_p.D165Y	0	0	0	0	0	0	0	0	0
CDK17_p.M85I	0	0	0	5.16988e-05	0.00196196	0	0	0	0
CDK17_p.R177H	0	0	0	0	5.16305e-05	0	0	0.0126942	0
CHSY3_p.I628M	0	0	0	0	0	3.6423e-05	0	0	0
CHSY3_p.R350H	0	2.90312e-05	0	0	0	0	0	0	0
CNBD1_p.A426S	0	0	0	0	0	0	0	0	0
CNBD1_p.F343C	0	0	4.10946e-05	0	0	3.6423e-05	0	0.00553337	2.539e-05
CNBD1_p.L396P	0	0	0	0	0	0	0	0	0
CNBD1_p.L396R	0	5.80624e-05	0	5.16988e-05	0	0	0	0	2.539e-05
CNBD1_p.S372N	0	0	0	0	0	0	0	0	2.539e-05
CNBD1_p.Y200F	0	0	4.10946e-05	0	0.00320109	0	0	0	2.539e-05
COPS2_p.A317D	0	0	0	0	0.000258153	0	0	0.00162746	0
COPS2_p.G68R	0	0	0	5.16988e-05	0	0	0	0.00162746	0
CPXCR1_p.A56S	0	0	0	0	0	0	0	0.000325492	0
CPXCR1_p.E73K	0	0	0	0	0	0	0	0	0
CPXCR1_p.S102P	0	0	0	0	0	3.6423e-05	0	0.000325492	2.539e-05
CTCF_p.P552S	5.21069e-05	0	0	0	0	0	0	0	0
CYLC2_p.D299Y	0	0	0	5.16988e-05	0	0	0	0	0
CYLC2_p.E133K	0	0	0	0	0	0	0	0	0
CYLC2_p.E152K	0	0	0	0	0	0	0	0	0
CYLC2_p.R71C	0	0	0	0	0	0	0	0	0
CYLC2_p.V105F	0	0	0	0	0	0	0	0	0
CYP3A5_p.G177R	0	2.90312e-05	0	0	0	7.2846e-05	0	0	0
DCAF4L2_p.A79V	0	0	0	0	0	0	0	0	0
DCAF4L2_p.G100V	5.21069e-05	0	0	0	0	0	0	0	0
DCAF4L2_p.L37H	0	0	0	0	0	0	0	0	0
DCAF4L2_p.P160L	5.21069e-05	0	0	0	0	0	0	0	0
DCAF4L2_p.P364L	0	0	0	0	0	0	0	0	0
DCAF4L2_p.R172C	0	0	0	0	0	0	0	0	0
DCAF4L2_p.V332L	0	0	0	0	0	0	0	0.000650984	0
DNASE2_p.Y182H	0	0	0	0	0.000619566	0	0	0	0
DNMT3A	0.000104214	2.90312e-05	8.21891e-05	5.16988e-05	5.16305e-05	7.2846e-05	0	0	0.00010156
eGFP	0	8.70935e-05	0	5.16988e-05	0.000103261	0.000145692	0.000279728	0.00585886	2.539e-05
EIF1AX_p.G9R	0	0	0	0	0	0	0	0	2.539e-05
ELF3_p.A332V	0	0	0	0	5.16305e-05	0	0	0	0
ERBB2IP_p.E463K	0	0	0	0	0	0	0	0	0
HcRed	5.21069e-05	0.000174187	4.10946e-05	0	0	0.000145692	0	0	0.00012695
HRH4_p.S115L	0	0	0	0	0	0	0	0	0
IDH2_p.E268D	0	0	0	0	0	0	0	0	0
IRF4_p.K123R	0	0	0	0	0	0	0	0	0
JMJD5_p.A230T	5.21069e-05	2.90312e-05	0	0	0	0	0	0.000325492	0
KIF2B_p.R504Q	5.21069e-05	0	0	0	0	0	0	0	0
KRAS_p.D33E	99.9981	99.9983	99.9976	99.9981	99.9765	99.998	99.9745	99.9626	99.9985
LacZ	0	0	0	0	0	0	0	0	0
LUCIFERASE	0	0	4.10946e-05	5.16988e-05	5.16305e-05	0	0	0	0
MAP4K3_p.R753Q	0	0	0	0	0	0	0	0	0
MET_p.R469Q	0	0	0	0	0	0	0	0	0
MET_p.S213L	0	0	0	0	0	0	0	0	0
NFE2L2	0.00119846	0.00098706	0.00193144	0.00144757	0.00139402	0.000983421	0.0150121	0.00227845	0.000939429
NFE2L2_p.G31V	0	0	0	0	0	0	0	0	0
NFE2L2_p.N160S	0	0	0	0	0	3.6423e-05	0.0100702	0	0
NFKBIA	5.21069e-05	2.90312e-05	0	0	5.16305e-05	3.6423e-05	0	0.000325492	0
PPP2R1A_p.S143F	0	5.80624e-05	0	0	0	0	0	0	0
PPP6C_p.E180K	0	2.90312e-05	0	0	0	0	0	0	0
RHEB	5.21069e-05	0	0	0	5.16305e-05	3.6423e-05	0	0	7.617e-05
SCEL_p.S10Y	0	0	0	0	0.00950002	3.6423e-05	0	0	2.539e-05
SERPINB4_p.E290K	0	0	0	0	0	0	0	0	0
SMAD4_p.R361P	0	0	4.10946e-05	0	5.16305e-05	0	0	0	2.539e-05
STAG2_p.R541K	0	0	0	0	0	3.6423e-05	0	0	2.539e-05
VHL_p.E186K	0	0	0	0	0	0	0	0	0
WNK3_p.E417Q	0	0	0	0	0	0	0	0	0
XPO1_p.E571K	0	0	0	0	0	0	0	0	0

## Sheet: pool6
Supplementary Table S4H: Tumor composition of Pool6
Mutation	P6M1_R	P6M1_T	P6M2_L
BFP	0	0	0.000212709
DNMT3A	0	0	7.09031e-05
eGFP	0.000208948	0	0.000212709
ERBB2IP_p.I979M	0	0	7.09031e-05
EYS_p.C554S	0	0	0
EYS_p.F336L	0	0	7.09031e-05
EYS_p.H466N	0	0	7.09031e-05
EYS_p.N269H	0	0	7.09031e-05
EYS_p.Q172L	0	0	0
EYS_p.R26Q	0	0	0
EYS_p.R587I	0.0162979	0	0
FAM116A_p.R427H	0	3.21132	0
FAM196A_p.Q46R	0	0	0
FAM196A_p.R399Q	0	0	0
FAM200A_p.S481N	95.1365	91.4664	7.09031e-05
FBXO16_p.T50K	0	0	0
GABRA6_p.A322T	0	0	0
GABRA6_p.G175R	0	0	0
GABRA6_p.G212R	0	0	0
GABRA6_p.P345S	0	0	0
GABRA6_p.R238K	0	0	0
GALNT14_p.A187T	0	0	0
GALNT14_p.F285L	0	0	0
GALNT14_p.P484S	0	0	0
GALNT14_p.R336Q	0	0	0
GALNT14_p.V534F	0	0	0
GALNTL5_p.D221E	0	0	0
GALNTL5_p.G309E	0	0	0
GCET2_p.H177Q	0	0	0
GEN1_p.L235R	0	0	7.09031e-05
GPR141_p.E267K	0	0	0
GPR141_p.Q224K	0	0	0
GPR141_p.T6N	2.16888	0.943184	0
GPR156_p.C763S	0	0	0
GPR156_p.R757L	0	0	0
GZMA_p.G210E	0	0	0
GZMA_p.H38N	0	0	0
HAPLN1_p.K115N	0	0	0
HAPLN1_p.P233H	0	0	0
HAPLN1_p.S326N	0	0	0
HAUS1_p.A102V	0	0	0
HcRed	0	0	0
HERPUD2_p.P46L	0	0	0
HERPUD2_p.R285Q	0	0	0
HIST1H1E_p.A60D	0	0	0
HTR3B_p.I118T	0	0	0
HTR3B_p.W95C	0	0	0
IKZF5_p.E135K	0	0	0
ISX_p.R86C	0	0	0
ISX_p.T87A	0	0	0
KIR3DL2_p.R96Q	0	0	0
KLRC2_p.G174R	0	0	0
KPNA3_p.V154G	0	0	0
KRT26_p.S2C	0.0670722	0.0673703	0
LacZ	0	0	7.09031e-05
LCE1B_p.G102C	0	0	0
LCE1B_p.S42F	0	0	0
LNX1_p.V564I	2.60996	4.3117	0
LUCIFERASE	0	0	0
MAP2K5_p.P111S	0	0	0
MFAP4_p.Y55S	0	0	0
MTM1_p.D298E	0	0	0
MTM1_p.P226S	0	0	0
MTM1_p.R253Q	0	0	0
NFE2L2	0.00083579	0	99.9989
NFKBIA	0.000208948	0	0
OMA1_p.P177S	0	0	0
OR2G6_p.I177F	0	0	0
OR2G6_p.K236M	0	0	0
OR2G6_p.N294Y	0	0	0
OR2G6_p.N42S	0	0	0
OR2G6_p.R265K	0	0	0
OR2G6_p.W149C	0	0	0
OR2M2_p.E232V	0	0	0
OR2M2_p.N42Y	0	0	0
OR2M2_p.P182S	0	0	0
OR2M2_p.V117I	0	0	0
OR2T33_p.L60P	0	0	0
OR2T33_p.R120S	0	0	0
OR2T33_p.W49L	0	0	0
RHEB	0	0	0.000141806

## Sheet: pool8
Supplementary Table S4I: Tumor composition of Pool8
Mutation	P8M1_L	P8M1_R	P8M1_T	P8M2_L	P8M2_R	P8M2_T	P8M3_L	P8M3_R	P8M3_T
AKT1_p.E17K	0.00104002	0.00171176	0.00480967	0	0.00114691	0.00037968	0	0	0.000616443
BFP	0	0	4.71536e-05	0.000330902	7.16818e-05	9.49201e-05	0.000130191	0.000120163	0
BRAF_p.G466A	0	0	0.000801612	0	0	0	0	0	6.16443e-05
BRAF_p.G466E	0	0	0.00471536	0.00137876	0.0101071	9.49201e-05	0.000846241	0	0
BRAF_p.G466V	0	0	0.00315929	0.000220602	0	0.00056952	0.000195286	0	0.00129453
BRAF_p.L597Q	0	0	0.000707305	0.000441203	0.000573455	0	0	0.00114155	0
BRAF_p.N581S	0	0	0	5.51504e-05	0	0	0	0.000360489	0
BRAF_p.V600E	0	0	0	0	0	0	0	0	0
CTNNB1_p.G34E	0	0	0	0	0	0	0	0	0
CTNNB1_p.G34R	0	0	0	0	0	0	0	0	0
CTNNB1_p.G34V	0	0	0	0	0	0	0	0	0
CTNNB1_p.H36Y	0	0	0	0	0	0	0	0	0
CTNNB1_p.I35S	0	0	0	0	0	0	0	0	0
DNMT3A	0	0	0	0.000110301	0.000286727	9.49201e-05	0.000195286	6.00815e-05	0.000123289
eGFP	0	0.000320954	0.000565844	0.000110301	0.00129027	0	0.000130191	0.00168228	0.000184933
EGFR_p.A289V	0.00748812	0	0.00216907	0.00270237	0.000430091	0.00180348	0.00104153	0.00180244	0.000369866
EGFR_p.G719D	0.00610143	0	0.00051869	0.000220602	0.000716818	0.00018984	0.00325477	0.000480652	0
ERBB2_p.V842I	0	0.00117683	0	0	0	0	0.00273401	0	0.000739732
FBXW7_p.R465C	0	0	0.00429098	0.000661805	0	0.0190789	0.0042963	0	0.00147946
FGFR2_p.P253R	0	0	0.000235768	0	0	0	0	0.00042057	0
FGFR2_p.R251Q	0	0	0	0	0	0	0	0	0
HcRed	0.000346672	0	0.000141461	5.51504e-05	0.000215045	0.00018984	6.50955e-05	0.00138187	0.000246577
HRAS_p.A59T	0	0	0.000471536	0	0	0	0	6.00815e-05	0.000863021
HRAS_p.G12A	1.19061	1.12462	1.98757	1.65142	1.30683	1.49841	1.22868	1.13512	1.71026
HRAS_p.G12C	0.00374406	0	0.000943073	0.000110301	0	0	0	0	0
HRAS_p.G12D	6.93345e-05	0	4.71536e-05	5.51504e-05	0	0	0	0	0
HRAS_p.Q61K	0.000832014	0	0.000943073	0	7.16818e-05	0	0	0	0
HRAS_p.Q61L	0	0	0	0	7.16818e-05	0	0	0.000540733	0.000308222
HRAS_p.Q61R	0.00526942	0	0.0167395	0.000606654	0.00573455	0.00151872	0.0057935	0	0
IDH1_p.P33S	0	0.000106985	0.000141461	0	0	0	0.000976432	0.000120163	0
IDH1_p.R132C	0	0	0	0	0	0	0	0	0
IDH1_p.R132H	0	0	0	0	0.00107523	0	0.00130191	0.000120163	0
IDH1_p.R132L	0	0	0	0	0	0	0	0	0
IDH1_p.R132S	0	0	0	0	0	0	0	0	0
IDH2_p.R172K	0.115511	0.0577717	0.0762946	0.128776	0.10867	0.102039	0.0820854	0.114696	0.153125
IDH2_p.R172M	0	0	0	0	0	9.49201e-05	0	0	0
KRAS_p.G12A	0.0270404	0.027816	0.0580933	0.0917702	0.0470233	0.0247741	0.0254523	0.0770244	0.0232399
KRAS_p.G12C	2.01784	1.8641	1.88341	2.31069	1.67499	2.3152	1.69177	3.92831	3.18362
KRAS_p.G12D	16.8528	23.0938	15.4348	12.6329	15.0529	15.5418	21.7492	17.5644	22.4681
KRAS_p.G12S	0.48236	0.283616	0.293484	0.232955	0.603991	0.215374	0.1975	0.328045	0.197385
KRAS_p.G12V	3.98264	4.73332	3.52605	4.53325	3.62359	2.06071	2.75549	3.07142	3.17142
LacZ	0	0	0	0	0	9.49201e-05	0	0	0
LUCIFERASE	6.93345e-05	0	0	0.000165451	0.000143364	0	6.50955e-05	0.000360489	0
MAP2K1_p.E203K	0	0.00299557	0	0	0	0	0	0	0
MAP2K1_p.P124S	0	0	0	5.51504e-05	7.16818e-05	0.00018984	0	0	0
MAP2K4_p.S184L	0	0.000534924	0	0	0	0.000759361	0	0	0
NFE2L2	0.00173336	0.00181874	0.0143347	0.00275752	0.0140496	0.00398664	0.00240853	0.0168228	0.00184933
NFE2L2_p.G31A	0.0103308	0.00149779	0.000612997	0.00110301	0.00759827	0	0.000390573	0	0
NFE2L2_p.T80K	0	0	0	0	0	0	0	0	0
NFKBIA	0	0.000106985	9.43073e-05	0	7.16818e-05	0	0	0.000120163	6.16443e-05
NRAS_p.G12A	0.0279418	0.02803	0.0556885	0.0258104	0.0237267	0.0296151	0.0363233	0.0638065	0.0332263
NRAS_p.G12C	2.98887	7.02023	3.23007	3.31608	3.881	5.98158	2.34611	3.74962	3.4138
NRAS_p.Q61H	0.853785	0.526686	0.638413	0.771885	0.79488	0.506778	0.689361	1.16955	0.750088
NRAS_p.Q61K	29.9526	30.8739	35.5754	34.2243	33.1174	33.8268	37.0084	28.7699	27.4318
NRAS_p.Q61L	16.5741	13.6387	15.8704	16.4861	17.4615	15.8411	12.6868	17.3134	18.2822
NRAS_p.Q61R	24.8693	16.6857	21.3051	23.5772	22.2578	22.0029	19.4583	22.6842	19.167
PIK3CA_p.H1047Y	0.00242671	0	9.43073e-05	0	0.000501773	0.00645456	0.00266891	0.00084114	0.00215755
PPP2R1A_p.R258H	0	0	0	0	0	0	0	0	0
PTEN_p.G127R	0	0	0.000377229	0	7.16818e-05	0	6.50955e-05	0.000300407	0.00271235
PTEN_p.G129E	0	0	0.00127315	0.00143391	0.00129027	0	0.00104153	0	0.000308222
PTEN_p.R173H	0	0	0	0	0	0	0	0	0
RAC1_p.P29S	0.0149762	0.0296348	0.00348937	0	0	0	0	0	0.000308222
RHEB	0.000970683	0	0	0	0	0	6.50955e-05	0.000120163	0
SMAD4_p.D537Y	0	0	0	0	0	0.00104412	0.000325477	0	0
SMAD4_p.R361H	0	0	9.43073e-05	0	0	0	0	0	0
STK11_p.D194Y	0.000832014	0.00181874	0.00136746	0.000827256	0	0	0.00735579	0.00222301	0.000308222
TP53_p.C176F	0.000762679	0	0.000188615	0	0	0	0.00162739	0	0
TP53_p.C275F	0	0	0	0	0	0.00161364	0	0	0
TP53_p.C275S	0	0	0	0	0	0	0	0.000180244	0
TP53_p.I195F	0.00117869	0	0	0	0	0.00218316	0.000260382	0.000360489	0.000369866
TP53_p.M246R	0.00374406	0	0.0013203	0.00231632	0	0.00170856	0.0014321	0	0
TP53_p.S215I	0	0	0	0.00115816	7.16818e-05	0	0.000260382	0	0
U2AF1_p.S34F	0	0	0	0	0	0	0	0	0
VHL_p.H115Y	0.00263471	0	0	0	0	0	0.00169248	0.000120163	0
VHL_p.R161P	0	0	0.000330075	0	0	0.010726	0.00104153	0.000781059	0.000308222
VHL_p.S111N	0	0	0.000188615	0	0	0	0	0	0
VHL_p.V130F	0	0	0	0	0	9.49201e-05	0.0028642	0	0

## Sheet: pool9
Supplementary Table S4J: Tumor composition of Pool9
Mutation	P9M1_R	P9M1_T	P9M2_L	P9M2_R	P9M2_T	P9M3_L	P9M3_R	P9M4_L
ACVR1B_p.D335N	0	0	0	0	0	0	0	0
ACVR2A_p.A381V	0	0	0	0	0	0	0	0
ADORA2A_p.R220W	0	0	0	0	0	0	0	0
AKT1_p.E267G	0	0	0	0	0	0	0	0
AKT1_p.R370C	0	0.0208664	0	0	0	0.000152468	0	1.58237
ARSI_p.V373M	0	0	0	0	0	0	0	0
B2M_p.C100S	0	0	0	0	0	0	0	0
B2M_p.D54N	0	0	0	0	0.000380794	0	0	0
B2M_p.M1V	0.000244991	0	0	0.00516635	0	0.00396417	0.00321731	0
BAP1_p.D75G	0	0	0	0	0	0	0	0
BCR_p.A426S	0	0	0	0	0	0.000152468	0	0
CBFB_p.R151H	0	0	0	0	0	0	0	0
CDKN1B_p.C29F	0	0	0	0	0	0	0	0
CHD2_p.P474R	0	0.000117227	0	0	0	0	0	0
CTCF_p.R377C	0	0	0	0	0	0	0	0
CTNNB1_p.T257I	8.16636e-05	0	0	0	0	0	0.000110942	0
DNAJC12_p.R178C	0	0.000117227	0.000150646	0	0	0	0.000110942	0
DNMT3A	0	0	0.000150646	0.409389	0	0.000152468	0	0.000192362
DNMT3A_p.A910V	0.0053898	0	0.00670373	0.00481005	0	0.0246998	0.000332826	0
EDNRB_p.F292L	0	0	0	0	0	0	0	0
EDNRB_p.L349I	0	0	0	0.0014252	0	0	0	0
ELF1_p.P32S	0	0	0	0	0	0	0	0
FBXO15_p.S366G	0	0	0	0	0	0	0.000998477	0
FBXW7_p.I347M	8.16636e-05	0	0	0	0	0	0.000110942	0
FTH1_p.A161T	0	0.000117227	0	0	0	0	0.00155319	0
GPS2_p.R102Q	0	0	0	0	0	0	0	0
H2AFX_p.K134N	8.16636e-05	0	0	0	0	0	0	0
HcRed	0.000244991	0	0	0.00017815	0	0	0.000110942	0.000192362
HIST1H3B_p.A48S	0	0	0	0	0	0	0	0
HRH4_p.S170L	0.0133112	0.000117227	0.00233501	0.683205	0	0	0	0
IDH2_p.A416V	0	0	0	0	0	0	0	0
IER3_p.A155T	8.16636e-05	0	0	0	0	0	0.000110942	0
KEAP1_p.G419W	0	0	0	0	0	0	0	0
KEAP1_p.G603W	0	0	0.0026363	0	0	0	0	0.000192362
KEAP1_p.P318L	0	0	7.53228e-05	0	0	0	0	0
KIF2B_p.E161G	0	0	0	0	0	0	0	0
KIF2B_p.G450V	0	0	0	0	0	0	0	0
KIF2B_p.I119T	0	0	0	0	0	0	0	0
KIF2B_p.W60L	0	0	7.53228e-05	0	0	0	0	0
LacZ	0	0	0	0	0	0	0	0
MAGEC2_p.S85I	0	0	0	0	0	0	0	0
NFE2L2	0.00138828	0.00164118	0.00120516	0.00124705	0.00114238	0.0128073	0.00710028	0.00134653
NFE2L2_p.G31R	23.9543	0.0133639	99.6218	34.8759	99.997	99.9485	4.45776	98.4142
NFKBIA_p.P137S	0	0	0	0	0	0	0	0
PIK3CB_p.E497D	76.0243	99.963	0.348292	63.7078	0.000380794	0.00213455	95.528	0.000769448
PIK3CG_p.V168M	0	0	0	0.0172805	0	0.000152468	0	0
PIK3CG_p.W212C	0	0	0	0	0	0	0	0
PIK3IP1_p.G185E	0	0	0.00640243	0.292878	0	0	0	0
PIK3R3_p.R383C	0	0	0	0	0	0	0	0
POT1_p.G76V	0.000408318	0.000703361	0.000451937	0.00053445	0.00114238	0.000152468	0.000332826	0.000769448
PPP6C_p.R264C	0	0	0	0	0	0	0	0
PTEN_p.G129V	0	0	0.00964131	0	0	0	0	0
PTEN_p.K6N	0	0	0	0	0	0	0	0
PTEN_p.R233Q	0	0	0	0	0	0	0	0
PTPN12_p.G99R	0	0	0	0	0	0	0	0
RASA1_p.L146S	0	0	0	0	0	0	0	0
RB1_p.F755I	0	0	0	0	0	0	0	0
RB1_p.I782M	0	0	0	0	0	0	0	0
RB1_p.R451H	0	0	0	0	0	0	0	0
REG1A_p.P105T	0	0	0	0	0	0	0	0
RHEB	0	0	0	0	0	0	0	0
RHOA_p.S85F	0	0	0	0	0	0.000152468	0.000110942	0
RHOA_p.T175M	0	0	0	0	0	0.00274443	0	0
RHOA_p.Y42C	0	0	0	0	0	0	0	0
RHOA_p.Y42S	0	0	0	0	0	0	0	0
SAMHD1_p.D218H	0	0	0	0	0	0	0	0
SAMHD1_p.I515T	0	0	0	0	0	0	0	0
SGK1_p.A48G	0	0	0	0	0	0	0	0
SMAD4_p.E134K	0	0	0	0	0	0.00426911	0	0
SPOP_p.E50K	0	0	0	0	0	0	0	0
SPOP_p.F133S	0	0	0	0	0	0	0	0
STAG2_p.E134D	8.16636e-05	0	7.53228e-05	0.00017815	0	0	0	0
STAG2_p.R252Q	0	0	0	0	0	0	0	0
WIPI1_p.P139S	0	0	0	0	0	0	0	0
WNT2_p.V334M	0	0	0	0	0	0	0	0
XPO1_p.E571A	0	0	0	0	0	0	0	0

[truncated: 4 more sheets: pool10, pool11, pool12, pool13]
