# Supplementary material for: Systematic Functional Interrogation of Rare Cancer Variants Identifies Oncogenic Alleles
Source: Oxford University Press journal article supplement (doi:10.1158/2159-8290.cd-16-0160), 2016-05-05
Supplement: 21598290cd160160-sup-162070_1_supp_3443528_25fwsn.xlsx [file 21598290cd160160-sup-162070_1_supp_3443528_25fwsn.xlsx]

## Sheet: Sheet1
Supplementary Table S6: Comparison to in silico methods
Mutation	This Study	Concordance to Polyphen2	Concordance to Mutation Assessor	Concordance to CHASM	Concordance to VEST	Polyphen2 score	Polyphen2 call	Mutation Assessor score	Mutation Assessor call	CHASM cancer driver p-value (missense)	CHASM FDR (red<0.05)	VEST pathogenicity p-value (non-silent)	VEST FDR (red<0.05)
AKT1_p.D44N	neutral	0	1	1	1	0.607	possibly damaging	0.69	neutral	0.146	>0.05	0.491622	>0.05
AKT1_p.E17K	functional	1	1	1	1	1	probably damaging	2.175	medium	0.0164	<0.05	0.00982147	<0.05
AKT1_p.E267G	functional	0	0	1	1	0.001	benign	0.785	neutral	0.0134	<0.05	0.0171515	<0.05
AKT1_p.L52R	functional	1	1	1	1	0.999	probably damaging	1.955	medium	0.0134	<0.05	0.00830007	<0.05
AKT1_p.Q79K	functional	1	0	0	1	0.996	probably damaging	1.825	low	0.0776	>0.05	0.0190541	<0.05
AKT1_p.R370C	functional	0	1	1	1	0.182	benign	1.985	medium	0.0008	<0.05	0.0389619	<0.05
AKT1_p.V201I	neutral	1	1	0	1	0.398	benign	-0.7	neutral	0.0024	<0.05	0.197908	>0.05
FBXW7_p.A502V	neutral	0	0	0	0	1	probably damaging	2.51	medium	0.014	<0.05	0.0133951	<0.05
FBXW7_p.I347M	neutral	1	1	1	0	0.003	benign	-0.345	neutral	0.0986	>0.05	0.0269616	<0.05
FBXW7_p.R465C	functional	1	1	1	1	1	probably damaging	2.165	medium	0.0266	<0.05	0.00874831	<0.05
FBXW7_p.R465H	functional	1	0	1	1	1	probably damaging	1.755	low	0.0298	<0.05	0.0100832	<0.05
FBXW7_p.R505C	functional	1	1	1	1	1	probably damaging	2.285	medium	0.0204	<0.05	0.00771086	<0.05
FBXW7_p.R658Q	neutral	0	0	0	1	1	probably damaging	2.27	medium	0.0008	<0.05	0.681165	>0.05
FBXW7_p.R689Q	neutral	0	0	0	1	1	probably damaging	2.615	medium	0.0008	<0.05	0.681165	>0.05
FBXW7_p.S462Y	neutral	0	0	1	0	1	probably damaging	1.96	medium	0.0484	>0.05	0.00987327	<0.05
IDH1_p.E190K	neutral	1	1	1	1	0	benign	-0.185	neutral	0.4262	>0.05	0.55193	>0.05
IDH1_p.P33S	neutral	0	0	0	1	1	probably damaging	3.215	medium	0.0008	<0.05	0.0465912	>0.05
IDH1_p.R132C	functional	0	1	1	1	0.259	benign	4.54	high	0.0034	<0.05	0.00580437	<0.05
IDH1_p.R132H	functional	0	1	0	1	0.127	benign	4.54	high	0.0552	>0.05	0.0163586	<0.05
IDH1_p.R132L	functional	0	1	1	1	0.027	benign	4.54	high	0.0012	<0.05	0.00634727	<0.05
IDH1_p.R132S	functional	1	1	1	1	0.981	probably damaging	4.54	high	0.0148	<0.05	0.00651641	<0.05
IDH2_p.A416V	neutral	0	0	1	0	0.986	probably damaging	2.945	medium	0.0444	>0.05	0.0115001	<0.05
IDH2_p.A47V	neutral	1	1	1	1	0.219	benign	1.655	low	0.0666	>0.05	0.258796	>0.05
IDH2_p.E268D	neutral	1	1	1	1	0	benign	1.21	low	0.288	>0.05	0.311103	>0.05
IDH2_p.G137E	neutral	0	0	1	0	1	probably damaging	4.175	high	0.0584	>0.05	0.00571351	<0.05
IDH2_p.I139F	neutral	0	0	0	0	0.924	possibly damaging	4.2	high	0.0078	<0.05	0.00821322	<0.05
IDH2_p.R172K	functional	1	1	1	1	1	probably damaging	3.9	high	0.0042	<0.05	0.00672533	<0.05
IDH2_p.R172M	functional	1	1	1	1	1	probably damaging	4.245	high	0.005	<0.05	0.00716348	<0.05
IDH2_p.T331M	neutral	0	0	0	0	1	probably damaging	4.135	high	0.0198	<0.05	0.00658531	<0.05
KRAS_p.A59G	functional	1	1	0	1	0.474	possibly damaging	3.55	high	0.0524	>0.05	0.0242695	<0.05
KRAS_p.D33E	functional	1	0	1	1	0.997	probably damaging	1.25	low	0.0164	<0.05	0.0113201	<0.05
KRAS_p.E62K	functional	1	1	0	1	0.942	possibly damaging	4.26	high	0.19	>0.05	0.0236396	<0.05
KRAS_p.G12A	functional	1	1	1	1	0.956	possibly damaging	2.27	medium	0.004	<0.05	0.0113798	<0.05
KRAS_p.G12C	functional	1	1	1	1	1	probably damaging	3.135	medium	0.004	<0.05	0.0101364	<0.05
KRAS_p.G12D	functional	1	1	1	1	0.517	possibly damaging	3.245	medium	0.0034	<0.05	0.00884082	<0.05
KRAS_p.G12S	functional	1	0	1	1	0.682	possibly damaging	0.845	low	0.0042	<0.05	0.00922075	<0.05
KRAS_p.G12V	functional	1	1	1	1	0.999	probably damaging	3.135	medium	0.004	<0.05	0.00830007	<0.05
NFE2L2_p.G31A	functional	1	1	1	1	1	probably damaging	2.865	medium	0.014	<0.05	0.010572	<0.05
NFE2L2_p.G31R	functional	1	1	1	1	1	probably damaging	2.865	medium	0.0106	<0.05	0.00898142	<0.05
NFE2L2_p.G31V	functional	1	1	1	1	1	probably damaging	2.865	medium	0.0024	<0.05	0.00628085	<0.05
NFE2L2_p.N160S	neutral	1	1	1	1	0	benign	0.55	neutral	0.1246	>0.05	0.984345	>0.05
NFE2L2_p.T80K	functional	1	1	1	1	1	probably damaging	2.865	medium	0.0048	<0.05	0.0122494	<0.05
NRAS_p.G12A	functional	1	1	1	1	0.775	possibly damaging	2.15	medium	0.004	<0.05	0.0121851	<0.05
NRAS_p.G12C	functional	1	1	1	1	0.675	possibly damaging	3.07	medium	0.007	<0.05	0.0107401	<0.05
NRAS_p.Q61H	functional	0	1	1	1	0.294	benign	3.53	high	0.0024	<0.05	0.0157672	<0.05
NRAS_p.Q61K	functional	1	1	1	1	0.948	possibly damaging	3.73	high	0.004	<0.05	0.0119944	<0.05
NRAS_p.Q61L	functional	1	1	1	1	0.973	probably damaging	3.875	high	0.0072	<0.05	0.0107401	<0.05
NRAS_p.Q61R	functional	0	1	1	1	0.214	benign	3.325	medium	0.0022	<0.05	0.0109109	<0.05
NRAS_p.Y64D	neutral	0	0	1	0	0.999	probably damaging	3.27	medium	0.0552	>0.05	0.00547809	<0.05
PIK3CB_p.A1048V	functional	1	1	1	1	1	probably damaging	2.845	medium	0.0008	<0.05	0.00763017	<0.05
PIK3CB_p.A593V	neutral	1	1	0	0	0.056	benign	1.185	low	0.0242	<0.05	0.0155204	<0.05
PIK3CB_p.E497D	neutral	1	1	1	1	0.009	benign	0.345	neutral	0.4342	>0.05	0.597238	>0.05
POT1_p.G76V	functional	1	1	0	1	1	probably damaging	2.8	medium	0.063	>0.05	0.00638074	<0.05
POT1_p.L265H	neutral	0	0	1	0	1	probably damaging	2.425	medium	0.3364	>0.05	0.00856618	<0.05
POT1_p.L388M	neutral	1	1	1	1	0.349	benign	1.87	low	0.567	>0.05	0.299858	>0.05
PTEN_p.F90S	neutral	0	0	0	0	1	probably damaging	4.095	high	0.0008	<0.05	0.00586575	<0.05
PTEN_p.G127R	functional	1	1	1	1	1	probably damaging	4.47	high	0	<0.05	0.00556521	<0.05
PTEN_p.G127V	functional	1	1	1	1	1	probably damaging	4.47	high	0	<0.05	0.0053359	<0.05
PTEN_p.G129E	functional	1	1	1	1	1	probably damaging	3.865	high	0	<0.05	0.00553602	<0.05
PTEN_p.G129V	functional	1	1	1	1	1	probably damaging	3.865	high	0	<0.05	0.00559456	<0.05
PTEN_p.K6N	neutral	1	0	0	1	0.392	benign	2.3	medium	0.0024	<0.05	0.29672	>0.05
PTEN_p.R173H	neutral	0	0	0	0	1	probably damaging	2.675	medium	0.0022	<0.05	0.00672533	<0.05
PTEN_p.R233Q	neutral	0	0	0	0	0.574	possibly damaging	1.975	medium	0.0008	<0.05	0.0229052	<0.05
SPOP_p.E47A	functional	1	0	0	1	0.998	probably damaging	0.895	low	0.283	>0.05	0.0272467	<0.05
SPOP_p.E50K	functional	0	0	1	0	0.011	benign	1.06	low	0.0008	<0.05	0.00997767	<0.05
SPOP_p.F102C	functional	1	1	1	1	1	probably damaging	2.52	medium	0.0028	<0.05	0.00874831	<0.05
SPOP_p.F133S	functional	1	1	1	1	1	probably damaging	2.39	medium	0.0002	<0.05	0.00665495	<0.05
SPOP_p.K101I	neutral	0	0	1	0	0.997	probably damaging	2.53	medium	0.1008	>0.05	0.0148028	<0.05
SPOP_p.K134N	functional	1	0	1	0	0.997	probably damaging	1.87	low	0.0048	<0.05	0.101477	>0.05
SPOP_p.W131C	functional	1	1	0	1	1	probably damaging	2.86	medium	0.0528	>0.05	0.00672533	<0.05
SPOP_p.W131G	funcitonal	1	1	1	1	0.798	possibly damaging	3.665	high	0.0056	<0.05	0.00720125	<0.05
	Sum	47	47	52	55
	Percent Concordant	66.1972	66.1972	73.2394	77.4648
