# Supplementary material for: Systematic Functional Interrogation of Rare Cancer Variants Identifies Oncogenic Alleles
Source: Oxford University Press journal article supplement (doi:10.1158/2159-8290.cd-16-0160), 2016-05-05
Supplement: 21598290cd160160-sup-162070_1_supp_3443536_w5fx2c.xlsx [file 21598290cd160160-sup-162070_1_supp_3443536_w5fx2c.xlsx]

## Sheet: Supplementary Table S4 L1000 ge
Supplementary Table S5: L1000 gene expression data of 1036 ORFs
landmark	TA.OE007_A03	TA.OE007_A04	TA.OE007_A06	TA.OE007_A07	TA.OE007_A09	TA.OE007_A10	TA.OE007_A11	TA.OE007_A14	TA.OE007_A15	TA.OE007_A16	TA.OE007_A17	TA.OE007_A18	TA.OE007_A19	TA.OE007_A21	TA.OE007_A23	TA.OE007_B03	TA.OE007_B04	TA.OE007_B05	TA.OE007_B07	TA.OE007_B09	TA.OE007_B11	TA.OE007_B12	TA.OE007_B13	TA.OE007_B14	TA.OE007_B16	TA.OE007_B17	TA.OE007_B18	TA.OE007_B19	TA.OE007_B20	TA.OE007_B24	TA.OE007_C01	TA.OE007_C04	TA.OE007_C05	TA.OE007_C07	TA.OE007_C13	TA.OE007_C15	TA.OE007_C17	TA.OE007_C19	TA.OE007_C22	TA.OE007_C23	TA.OE007_C24	TA.OE007_D01	TA.OE007_D03	TA.OE007_D04	TA.OE007_D07	TA.OE007_D09	TA.OE007_D12	TA.OE007_D13	TA.OE007_D15
PSME1	-0.8062	0.3613	-0.0685	-0.7804	-0.07125	-0.01242	-0.6376	-0.7444	-0.6296	0.1126	-0.3596	0.2761	-0.8701	-0.6501	-0.2119	-3.1281	-0.6563	0.9034	-0.8335	-0.1237	0.9416	-3.292	-0.213	-1.0381	-0.5454	0.9911	-0.6891	-0.2472	2.0318	-0.7607	-0.9461	0.1337	0.2024	0.2093	0.8232	-1.0372	0.1263	0.1049	-0.1253	0.2485	1.2155	0.4179	-0.4128	-0.7841	-0.393	-0.1158	-3.6442	1.0849	0.1564
CISD1	0.6436	0.9113	0.9179	0.462	0.5355	0.2773	0.6464	-0.07913	0.1558	1.6549	0.8077	1.9431	0.9605	-0.1728	1.1885	2.3726	1.9881	0.4222	-1.3112	0.2414	0.0903	1.3864	0.1245	0.6666	1.5727	0.8854	0.1949	0.6296	0.3837	2.007	1.0957	-0.2935	0.9537	0.5231	0.3696	2.3397	0.3708	0.1387	0.274	0.2793	0.247	-0.1268	0.003638	-1.0158	-0.8584	-0.9887	-0.03138	0.05179	0.007845
VDAC1	-1.4536	-5.3718	-0.3712	0.2907	0.3868	0.2935	-0.5285	-2.2992	-1.7459	0.2119	-0.439	-0.6745	-0.07901	-0.1478	-1.0149	-4.1273	-2.5659	-0.5452	-2.7075	-0.2513	-5.067	1.2696	0.4628	-0.8084	-0.426	1.1459	0.2774	-1.0787	-7.2522	-0.8084	-0.001867	-0.2801	-1.1643	0.1511	-6.6883	1.1161	-2.2533	0.4114	-0.2794	-0.4601	0.06205	0.1008	0.2325	-1.9532	0.9865	-4.9471	3.3482	0.1972	-0.06706
SORBS3	-0.4971	0.01775	-1.739	1.1884	-0.2989	-0.3121	-4.005	-1.8813	-0.9329	-5.7195	-4.3031	0.4948	-2.3503	-0.3306	-3.3331	-3.4859	-0.5469	-0.2117	-0.4633	-2.6117	0.6113	-3.3755	-3.6533	-0.3468	-7.0486	-4.9433	-0.09726	-3.9242	-2.1606	-1.8935	-0.9204	0.3451	0.02958	-0.3909	-0.1469	0.09126	-4.7464	-1.6877	-1.9415	-1.7837	-6.3535	0.325	0.2664	-4.0149	0.7299	-1.8663	-5.1566	0.197	-1.9602
SPDEF	0.627	1.0949	1.2279	0.9414	0.7508	0.4189	2.2016	1.7369	0.527	3.7635	2.3118	1.4329	1.8487	1.4251	2.7786	3.2818	1.2124	0.7303	0.4593	0.8304	-0.3709	2.6569	2.7507	0.1637	5.1838	2.7527	0.9213	3.0932	2.2262	2.3339	2.1075	1.1488	0.4994	0.6148	1.2623	0.8766	3.1073	0.9221	2.0652	2.618	3.529	0.8056	1.183	1.1819	0.6916	1.1874	2.3847	0.1442	1.3849
ATF1	1.6895	1.3181	0.9032	-0.08855	0.4415	0.1957	-0.3578	0.0509	0.8939	0.2146	1.1394	0.4177	0.9888	-0.9539	0.9072	-2.1893	0.9139	0.6666	-1.3389	-1.4176	-0.01955	-2.4819	0.5774	-0.8904	0.569	0.2101	-1.0887	-0.2747	0.4095	-0.09432	0.2356	0.4584	0.05979	0.1969	-0.9531	0.04848	0.1674	0.6711	0.2706	1.1159	0.9394	-0.6612	0.09966	0.5664	-0.1672	-0.7516	-1.1862	-0.06432	-0.528
SPAG4	2.5042	3.4443	1.7787	4.412	-0.912	-0.2834	2.407	-0.4372	-0.407	-0.8676	2.4667	-0.8481	1.7049	0.7789	-1.0038	0.6578	1.8511	-0.9929	0.6538	-0.5202	2.9669	-0.2874	-0.8659	1.0843	-0.5716	-0.951	1.0357	-0.9459	-0.2237	-1.152	0.7282	-0.07462	-0.9666	4.1865	-0.8914	0.9033	1.8366	1.1515	-0.5755	-1.0348	-0.2797	-0.7158	1.0185	3.9984	2.0184	2.3245	3.4206	-0.3127	0.4961
E2F2	7.1403	5.6979	8.2607	5.0862	0.7561	2.7163	5.0554	-0.8533	0.3481	0.3603	-0.3139	10	7.2156	3.3258	-0.0483	5.7411	0.6674	-0.2352	-0.4731	0.00561	4.8512	4.9745	0.2365	0.5043	2.9505	0.1671	3.5953	2.3532	3.1836	3.2079	-0.5989	-0.1357	4.999	3.4555	3.7369	-0.5758	3.1057	1.257	6.3266	3.355	0.3201	-0.2978	-0.2595	-0.7754	-0.05077	5.4044	4.8247	5.9961	0.04808
RHEB	-0.2638	-0.3867	-1.1636	0.4536	-0.246	-1.4184	-0.5559	0.3504	-0.8215	-0.5559	0.3128	0.3845	0.3043	-1.5652	0.5552	-3.6446	-0.3889	0.7879	-0.1169	-0.7156	-0.3025	0.2021	0.3128	0.8409	0.2595	-0.1507	0.58	-0.6409	-0.982	0.265	-1.7327	-0.4001	-0.08636	-1.3344	0.2605	1.7092	0.1944	-0.447	-0.3684	0.802	-0.0152	-0.05317	0.02433	-2.9514	-0.4205	0.2336	-0.4523	-0.6882	-0.05135
IGF1R	-1.2968	-0.1078	-0.2147	0.4092	-0.4262	-0.2117	-0.9577	0.2467	-0.07292	-0.7382	-0.1222	0.4636	-0.1651	-1.1272	-0.6147	0.07017	-0.4805	-0.1413	-1.1021	0.2428	-0.0773	-0.8372	0.2352	0.1664	-1.0451	0.3237	-0.561	-0.9082	-0.06269	-0.6041	0.5953	-0.1784	-0.7276	-0.3501	0.2706	-0.05727	-1.0828	-0.3066	-1.0671	0.17	0.3856	0.4343	0.7347	-1.115	0.1222	-1.024	-0.9207	0.08299	-0.3925
SLC5A6	0.1622	0.5493	0.4162	-0.2199	0.6345	0.2128	1.2528	-0.3383	0.09566	0.2354	-0.4145	-0.521	0.1149	-0.5637	0.305	-0.2653	0.001199	0.4591	-1.2298	-0.1769	0.9104	-0.2694	-0.2652	-0.3091	-1.2384	-0.2085	0.6902	0.7249	-0.7016	-0.9802	0.414	0.5202	0.5116	0.8083	0.6968	0.2893	0.5816	0.3156	0.7925	-0.7126	-0.06895	0.1347	-0.09762	-0.7269	0.3889	1.9318	-1.6553	-0.06812	0.03363
FOXO3	-0.382	0.6237	-1.0364	0.4532	-0.03275	-0.08209	-0.1565	-0.2798	0.1345	-0.3467	0.01095	1.0785	-0.09967	-1.3681	-0.6269	0.05105	1.6543	-0.5971	-0.9749	0.04377	-0.8115	-0.4701	0.5127	-0.05593	-1.8015	-0.7081	-0.3064	-0.41	-0.2919	-1.416	-0.3665	0.04054	-0.9683	-0.1353	-0.7771	-0.891	-0.2471	-0.1739	-1.4804	0.01303	-0.1763	0.7239	0.1589	-2.2431	0.09563	0.1446	-1.2443	-1.0903	-0.1783
RGS2	-0.8349	0.1113	1.7306	0.2872	-0.0916	-1.0997	-1.972	1.3935	-0.288	-1.0061	-1.7499	1.6901	1.2587	0.3358	0.1927	0.2333	1.5058	1.0086	0.9262	-1.4077	1.7515	-1.9591	-0.2163	0.8335	1.606	1.7679	-0.556	-1.5434	1.888	-0.1286	2.0137	0.1719	-0.01437	0.5986	2.0089	0.865	-0.5264	0.1133	-0.5548	0.09959	0.9051	1.3469	-0.5199	4.268	-0.7223	-0.5552	1.5507	0.08287	-0.3215
GSTM2	-0.7486	-0.0969	-1.3675	0.575	-0.2211	0.7375	-0.7133	0.2395	-0.4204	-0.7137	0.3735	-1.3802	-0.5984	0.03212	-0.1119	1.5905	-0.1548	-0.394	-0.6044	-1.3238	-1.2553	-1.5376	-0.1771	-0.1135	-0.3077	-0.6158	-1.3043	-0.3466	0.1579	-0.4569	-1.006	-0.5887	-1.0614	-1.2921	-0.07867	-0.05895	0.05294	0.282	-0.5376	-1.201	-2.1432	-0.3174	-0.3692	0.07527	0.4	-1.0559	-0.5941	-0.05575	-1.0714
SCYL3	0.05336	2.1677	1.4349	-0.5149	1.4961	0.4042	0.9039	-0.3783	0.5156	-0.7005	-0.2713	1.729	0.7156	0.2094	-0.295	1.3644	0.6527	0.02378	-0.0574	1.5199	-0.1979	0.8198	-0.1788	1.0387	0.8209	0.5171	0.9859	-0.2341	-0.3097	0.4153	2.4161	0.5623	1.4491	1.7095	0.5739	0.1257	-0.4635	0.2382	0.156	1.8371	0.7879	0.3468	0.2717	0.149	-0.2127	1.9334	-0.2466	-0.3959	1.7337
RHOA	-0.3069	0.09145	-0.5792	-0.6942	0.3115	-0.1724	0.1904	-0.7867	0.1024	-0.5638	-0.9254	-1.3736	0.8283	-2.0685	0.1609	-3.3541	-0.718	-0.7455	3.8139	0.8339	-0.7973	-1.3343	-0.6959	0.2014	-1.7726	-0.3269	-0.4385	-0.7272	-1.4185	-1.4283	-0.7422	1.0514	-1.1762	-0.6906	-0.04018	-0.07747	0.2037	0.3888	-1.236	0.0814	-1.2317	-0.2738	-0.7647	-1.1331	0.7751	0.8989	-2.0594	0.3558	-0.5115
TBX2	0.4181	0.4315	-1.2768	0.3688	0.3347	0.4555	4.0252	1.8197	1.5503	4.8029	-0.7796	-3.8431	1.453	-0.222	0.2938	2.0165	3.7831	-1.056	1.9945	-0.3496	0.04245	-0.2404	5.1627	0.5524	-1.4126	2.3912	-0.3589	0.07305	-1.779	0.2786	-0.6648	-0.9011	0.4732	5.9911	2.7914	-1.2603	2.9098	-0.6464	0.2074	-0.2248	4.1065	0.814	-1.3561	-1.4225	0.2499	2.4397	0.2201	4.0151	0.06768
DNAJA3	-0.34	-0.5861	-4.1091	-5.3925	-0.166	0.2232	1.2683	-2.7714	0.2217	0.7946	0.9346	-10	-6.7385	0.8268	0.3783	0.7451	0.8271	1.313	-0.4717	0.2396	-10	0.7125	0.3828	-1.2161	0.6779	0.4438	-2.4897	1.4697	-3.5573	1.5457	-2.6183	0.06221	0.1659	0.2096	0.5883	1.6719	0.5744	-0.316	-2.4422	-2.7998	-5.5504	0.3508	-0.1248	0.03848	-0.2184	-0.3828	-0.8646	-0.2407	0.9115
IL1B	3.2412	-1.0536	2.1932	2.3138	-0.1433	-0.5455	-0.2398	0.9375	-0.1024	0.072	-0.4521	5.143	2.4111	2.906	4.4487	1.4023	-0.2679	1.1712	8.8982	-0.3067	2.7631	2.9841	0.5427	-0.1678	7.2457	0.00343	2.5362	0.274	1.4747	4.1925	2.5407	-0.7973	0.1015	-0.2588	0.1805	0.9787	-0.7681	-0.1715	2.5196	1.5353	-0.5709	0.8561	0.2585	9.1782	-0.802	-1.1674	6.4222	0.7028	-1.0947
ASAH1	0.02734	0.5423	0.3063	0.4166	0.4777	0.6386	-1.568	0.505	-0.3607	0.5153	0.3074	1.4999	0.7282	1.1053	0.7844	0.784	-0.1236	0.1041	-0.9532	0.2984	0.6881	0.0449	0.4401	-0.5029	0.07996	0.8855	0.4182	0.7549	0.8206	0.5435	-0.2832	0.1658	0.5176	0.4192	1.5215	0.2421	0.2339	0.3869	0.4948	0.2378	0.8122	0.5641	0.8349	-0.5997	-0.2067	0.9616	1.0391	-0.1842	-0.4829
DCUN1D4	0.706	-0.1475	0.4733	-1.3864	-0.2303	0.05353	1.0878	-0.07379	0.01826	-0.5572	-0.2903	-3.2225	-0.2671	-1.1499	0.5586	0.7403	-0.7375	-0.6813	0.03888	-1.5393	-1.7558	-0.7827	-0.3961	0.1303	0.03924	-0.7341	0.08603	-0.913	-0.4796	-0.4133	0.1441	-0.6492	-2.7432	-0.7547	-0.6331	-0.09668	-0.2169	-0.2923	0.1893	0.4423	0.1094	-1.6152	-0.8988	0.1588	0.5369	-1.6292	-1.9322	0.2713	0.2621
DYRK3	0.2106	-0.9111	1.2335	-0.6256	-0.5394	1.4052	-0.7534	1.8674	0.5818	-0.1575	2.1514	-1.7371	1.0096	0.3733	3.5789	2.2832	-0.2154	0.4971	1.6093	-0.5053	3.1803	1.6655	2.7835	0.9882	3.0172	-0.6432	-0.5181	-0.08057	-0.3846	0.3348	2.5575	0.1636	-0.2913	-0.4811	0.4218	2.0059	3.6529	-0.03258	1.56	-1.1756	4.3691	0.2565	0.2604	2.0028	2.5643	2.9704	3.4083	-0.4124	-0.3396
RALA	-0.6052	0.2354	-0.2643	-0.3033	0.4604	-0.2127	0.1127	-0.0923	-0.4687	0.1978	-0.6605	0.2498	-0.2552	1.8242	2.3377	0.6149	-1.1615	0.8915	9.7564	-0.2683	-5.6017	4.2801	0.0314	0.3183	0.8607	0.2248	1.38	-0.3285	-1.6037	2.8914	-0.695	-0.7648	0.2437	-1.3069	0.0991	0.1033	-3.229	-0.1509	0.02058	0.3014	0.08655	0.0797	0.6372	4.4069	-2.9815	-0.9291	5.2175	-0.03562	-0.9484
ARHGEF12	0.6427	0.1747	0.9722	1.0939	-0.0017	0.6524	1.3015	0.3151	0.7012	0.05795	-0.0643	1.8139	0.6635	0.776	-0.2087	1.8027	0.3756	-1.2555	-0.1059	0.2146	0.5676	-0.4388	-0.6363	0.6082	1.2073	0.6686	-2.0377	0.4264	0.02538	-0.7882	0.3692	-0.2474	0.7648	0.6279	0.05887	-0.6681	-0.4628	0.3388	-0.7264	-0.1294	-0.2396	-0.9	-0.9242	1.163	0.3134	-0.1116	0.8889	0.2288	-0.1275
POLG2	1.1797	1.1894	-0.7493	0.4358	-0.7121	1.3416	0.1635	-0.4126	0.9056	-0.2521	1.1837	1.2624	-0.677	-0.04327	-0.06485	0.475	-0.1423	0.3039	-1.2873	1.0415	1.8446	0.0583	0.4307	0.104	-0.4422	-0.1192	0.7225	-0.6519	-0.6686	-0.09093	0.134	0.5527	0.5671	-0.3569	-0.02976	0.4572	0.5914	0.3464	-0.007802	0.3321	0.7012	0.3229	0.4432	-0.3782	-0.3962	-0.0593	-0.7715	1.5858	-0.6126
SOX2	0.3211	0.06765	0.3936	0.0419	0.0596	0.04166	-0.0174	-0.2767	-0.1724	0.9452	1.0764	0.1232	-0.5179	0.9054	1.0899	3.2992	0.9023	1.6719	0.5067	0.7745	-0.9518	0.2577	0.0889	-0.2337	0.4782	-0.4698	2.7511	0.4995	0.4327	1.2504	1.5086	1.1182	0.003809	0.4906	0.3029	0.3111	3.518	-0.8928	1.2963	0.7136	0.2912	1.0579	0.5729	0.238	0.0331	0.4648	0.4761	-0.6597	0.3798
TRAPPC3	0.1	-0.0766	-0.713	-0.2412	0.07	-1.0338	-0.6787	-0.4889	0.04059	0.2673	0.1486	0.3628	-0.09702	0.04705	1.0096	-3.2339	0.6791	0.1845	0.08776	-0.2267	-5.0978	0.7889	-0.3651	-0.5101	-0.4911	-0.7713	-2.8667	-0.4253	-0.6733	0.6115	0.04641	0.3937	0.06836	-1.1158	-0.4395	-0.0647	-3.4148	-0.4505	0.2542	0.5062	0.9554	1.0103	0.7862	-3.7485	-0.06625	-0.406	-1.1737	-0.7582	0.2194
SERPINE1	-1.1059	-0.2087	-0.05725	-0.9394	-0.2542	0.7454	0.1932	0.4751	0.08421	-0.1681	-0.8275	0.4769	-0.4505	0.8549	-2.7369	-3.8235	-0.3202	0.6104	-1.4982	-0.1062	0.9613	0.804	-0.354	-0.1552	-6.3089	0.807	0.6653	0.8612	-2.2616	-3.7214	-0.8766	-0.1376	-0.1152	0.722	-1.5818	-1.5569	0.06212	0.8407	0.139	-0.04162	-0.6745	-0.4697	-0.2384	-5.8842	0.1717	0.7317	-3.6607	2.2	0.2585
TCFL5	-0.04027	1.3806	4.0855	-0.252	-0.5837	-0.5535	-0.4391	0.04847	2.8393	0.1394	-0.0851	10	-0.6704	-1.0312	-0.7043	4.4027	-0.182	0.2317	3.3459	-0.2672	0.09255	0.146	0.5459	2.0351	-0.5044	1.8019	-0.6384	10	-0.2749	-0.7422	6.537	-0.2924	-0.3979	0.007796	1.1187	3.6562	3.3551	0.2122	-0.00101	0.5095	0.7926	-0.567	-0.3737	0.2231	3.1402	1.0463	-0.5423	1.085	-1.3824
CRK	-3.9456	-0.7057	-0.6635	-4.7099	0.6579	-0.3209	0.7109	0.1616	-0.3275	-0.3841	-1.4026	-0.2908	1.0011	1.2719	-0.219	-4.2386	0.1965	-1.9321	1.4188	-0.3384	-5.3315	1.5617	-0.1918	0.5175	-1.1919	0.1299	-0.02863	-0.06065	-0.8966	-3.0444	-0.1061	-3.6992	-0.2118	0.4322	1.163	-3.256	-3.0761	-2.4177	0.3962	-3.4092	0.1496	-0.05587	-2.1605	-3.561	1.7228	-4.9903	-5.4453	-1.7518	-0.06705
HLA-DMA	3.1811	-1.8616	-1.2486	3.9886	-0.155	-0.8877	0.1305	-0.7033	-0.09797	-0.2519	-1.3949	0.8903	-1.0482	0.2094	0.7128	4.0046	-0.4762	-0.09857	-0.7561	-0.5574	5.3671	-0.5965	-0.2174	0.0751	0.1934	-0.3852	0.2812	-0.5122	1.2353	2.8215	-1.0771	2.7008	-0.4562	-0.4067	-0.6706	2.6729	3.659	2.7497	-0.6954	3.4412	0.09265	0.5347	1.8747	3.0889	-0.7977	4.9141	6.0354	1.7063	0.2256
EGF	0.9024	0.3566	-0.387	-0.4913	0.2842	-0.1694	-0.2599	-0.102	0.1653	0.1778	-0.6508	0.0487	-0.489	1.1613	-2.0972	0.9071	0.03801	-0.9642	-4.0626	-0.6327	-1.0088	-1.5131	-0.3371	-0.4148	-4.1819	-0.6081	0.3377	-0.1832	-2.3399	-3.4752	-0.6391	0.2743	0.04555	-0.5777	4.1787	-3.2282	0.4992	0.1689	0.4739	0.3854	0.5835	0.9133	1.1993	-5.7739	0.375	0.4874	-1.0446	0.3664	-0.6446
RBM34	-1.3135	-0.7296	-0.4078	-0.8155	-0.1293	0.1532	-0.7512	-0.5786	-0.8652	-0.3872	-0.7169	-1.4241	-0.7177	-0.4814	-0.463	-1.4516	-0.5254	-1.6075	0.8763	-0.5661	-1.2141	-1.0911	0.3852	0.1147	-0.6097	-0.3049	-0.3051	-1.0577	0.3137	-0.946	-0.5131	-0.05069	0.1455	1.1312	-5.5465	-2.2845	0.007111	-0.2335	-1.1303	-0.3658	0.1633	0.3343	0.9167	0.6351	-0.3098	0.3633	-0.5075	0.232	-0.4655
ITGB1BP1	-0.1971	0.5591	0.1915	-0.5595	0.357	0.1261	-1.808	0.05765	-0.6046	0.06075	1.0675	-0.9766	0.4058	0.8045	1.3639	-0.3293	-0.09413	-0.1439	3.1613	0.128	-1.3359	1.6768	0.4963	-2.2203	0.4528	-0.9561	1.4029	-0.01306	-1.2997	1.1745	-3.4387	-3.7848	-1.0792	-0.7838	-6.0352	-1.8788	0.166	-1.0251	-3.4842	0.2763	0.01795	0.06187	-2.5548	1.2194	0.175	0.2589	3.038	-4.994	-0.8021
SPTLC2	-2.1057	0.1565	-0.8928	-0.339	-0.4383	0.4777	0.136	0.02668	0.05671	-1.0834	-1.4045	-0.1558	-0.2975	-1.5508	-2.3147	-2.6868	-0.3118	-1.0959	-1.4763	0.009511	0.4701	-0.2108	-0.8395	1.4783	-3.7137	0.8121	-0.9084	-0.6538	-0.5411	-3.6138	0.9117	3.6134	-0.7673	0.01239	1.5323	-1.5698	0.6834	0.6836	-0.3187	-0.5365	-0.4632	-0.1735	-0.5623	-3.4136	0.6134	0.1581	-3.5588	1.222	0.2203
ACLY	-0.6777	0.2148	0.9191	0.3584	-1.1504	0.7071	0.0084	0.9532	0.1046	-0.248	-0.1148	-1.0248	-0.2221	-0.2416	-1.5535	-3.3778	-0.3774	-0.8864	-1.194	0.8356	-0.2578	-1.6857	-0.3185	-0.1548	-2.0558	-0.993	3.2421	0.3516	-1.2827	-2.5302	-1.3923	0.2834	-0.6769	0.3425	1.7654	0.1517	0.1078	0.5612	0.1729	-0.4472	-0.8817	-0.04498	2.6881	-1.8246	0.7717	0.4083	3.0414	-0.02654	0.01753
APP	0.4649	-0.696	-0.4365	-0.6026	-0.7302	0.2048	0	-0.5888	-0.4716	-0.2514	0.1703	-0.576	-0.552	0.7973	0.9834	1.0837	-0.3732	0.926	0.3227	-0.5429	-0.0054	1.2259	0.4823	-0.01824	2.8716	0.1472	0.09727	-1.0337	0.9177	2.7585	-0.9345	-0.5275	0.02179	0.555	2.4609	3.0182	-0.5937	-0.2446	-0.4703	-0.697	-0.3372	-1.115	-1.0253	1.548	-0.2916	0.2751	-3.7182	0.2997	-0.4874
RAD51C	-0.926	0.9863	0.6954	-3.7636	0.8838	-1.4184	-1.6451	0.4473	-0.03042	1.2275	1.0084	-0.2958	-1.673	0.7951	1.3593	2.2921	0.8151	0.9228	0.9606	-0.3033	-2.4771	-2.7702	0.465	-0.7408	-0.7689	-1.3324	0.5727	-0.8268	-0.4872	1.3343	1.7674	-1.8129	0.3983	-1.35	0.2436	0.2749	-1.0147	-1.3982	0.3591	-2.1538	-1.2938	1.329	0.9877	-0.8885	-0.4422	-0.159	0.9779	-0.681	-0.2106
TSKU	0.5056	0.04555	0.3446	1.7469	0.01255	1.175	1.0919	0.3524	0.3715	-0.4866	0.1072	0.6868	1.016	-0.346	-1.5296	-0.7186	0.4215	-1.3675	0.5268	0.5575	1.4248	-1.0518	-0.9936	0.162	-1.0818	2.4071	-0.4892	0.4207	0.8282	-1.1297	-1.4175	1.1249	0.1713	0.606	-0.4188	-1.6591	0.6404	1.2267	0.3297	1.1604	1.2408	-1.1732	-0.5705	0.00816	0.6343	-0.147	-1.7851	1.0714	-0.06252
SMC1A	-0.2876	-0.5324	-0.2361	-1.7165	-0.5267	-0.177	-0.9389	-0.6952	-0.39	0.966	0.03945	-0.0918	-1.063	0.05466	-0.3435	0.1544	0.936	-0.06782	-0.5351	-0.6324	2.2866	-0.2556	0.7236	0.7512	-0.5131	-0.2377	-0.2716	-1.0019	0.5303	-0.1437	-0.6806	-0.1809	-0.1336	0.2158	0.584	0.3485	-0.6067	0.2295	-0.009105	-0.3339	-0.3679	-0.4275	0.3826	-1.1164	0.07415	0.3662	0.2114	-0.2022	0.2961
TMEM2	1.9105	0.587	0.1521	-0.2569	-0.08675	0.9559	0.3885	0.4768	0.5032	-0.1659	-1.5602	0.9187	-0.1723	2.0118	-0.4977	-2.9059	-0.9533	-0.9946	-3.6008	0.2848	1.008	-2.1027	-0.8176	-0.2476	-1.4209	-0.5538	-0.2637	0.07523	0.3194	-1.8638	0.8821	0.3725	-0.04279	0.2977	-1.7656	-2.184	-0.007773	0.08951	-0.5797	0.209	0.1822	0.488	-0.4273	0.4985	0.652	0.274	-1.7501	-0.2818	0.3722
NOS3	0.06781	0.2826	-0.1331	5.7472	0.07035	0.0812	-0.01375	2.2586	1.7848	0.0149	-0.0271	0.1132	-0.1489	0.2602	0.2264	3.8407	-0.1185	0.3465	2.7563	2.6589	4.7951	1.2102	0.115	-0.104	4.2288	-0.9741	3.0977	-0.4298	4.7934	3.4248	0.2017	0.3807	4.7166	-0.3938	1.3456	3.3146	0.2332	0.2625	2.6041	-0.2785	0.1151	0.1877	0.03035	-0.02008	-0.2405	5.6253	1.6558	-1.6516	-0.9823
YME1L1	0.215	0.7609	0.9167	-5.1342	0.7225	0.1404	0.0103	-2.1115	-1.4466	-0.03725	0.132	0.7308	1.0522	-0.009253	-0.0591	-7.7078	0.1389	-0.5668	-3.7687	-3.0345	-3.4275	-2.1574	0.0679	0.203	-8.1985	0.4702	-2.7644	-0.04526	-3.5662	-5.0556	-0.2877	0.1333	-5.1865	-0.3145	0.7091	-4.9845	0.6728	-0.9672	-2.5182	0.1408	-0.22	0.5598	-0.5424	-2.2539	-0.2526	-4.8773	-0.01246	0.9447	0.4239
ACAA1	0.3413	-0.6539	-0.6014	-1.0108	-0.5793	-0.7415	-0.102	-1.0968	-0.7986	0.3378	-1.4718	-0.721	-1.3156	1.6186	0.0427	-1.7533	-0.8889	1.0668	0.3999	1.3244	-0.437	0.3798	0.4482	-0.5046	0.07384	-0.786	1.5437	0.5694	0.5297	-0.4828	-0.2008	-0.05175	-0.3382	-1.399	0.3793	0.1826	-0.1118	-0.7742	-1.5908	0.1283	-0.5235	1.149	0.5963	0.08191	-0.7531	0.1293	0.7496	-0.9815	-0.2005
CSNK1A1	-0.2123	-0.2868	-2.1349	-0.9126	-0.3372	-0.5877	-0.6359	-0.7165	-0.7464	-1.2558	-2.3503	-0.347	-0.2988	-3.3096	-1.4362	-0.7166	-0.989	-2.0616	0.3848	-2.986	0.6967	0.1758	-0.02645	-0.2221	-0.5389	0.4456	-1.3086	-1.3643	-1.0439	-0.5648	-0.9881	0.09888	-2.0912	-1.0407	-0.359	0.5505	-0.2118	0.6298	-0.8073	-0.854	-0.5455	-0.7801	-0.3163	0.6588	1.6198	-0.08101	0.2109	0.7972	-0.4672
HSPA8	0.7511	0.4861	-0.05797	1.3614	0.6423	0.818	0.3109	1.0517	-0.8303	-0.05165	0.4718	0.3541	1.6399	-2.0211	-0.5766	-7.8514	0.2622	-0.6614	-0.5301	0.751	1.5196	-0.1645	-0.1394	-0.1718	-1.3614	0.7094	-0.2446	0.333	-0.7439	-4.071	-1.0302	-3.483	-0.2133	-2.3073	-1.3714	0.5639	0.2091	-0.2166	-0.5766	-0.1322	0.1913	-0.2683	0.02227	-4.7085	0.9491	-2.6498	0.3746	0.7004	0.2233
NFATC4	-0.8583	0.2585	0.7878	0.3892	0.6084	0.03862	1.4455	0.4495	0.5007	1.6709	0.2995	0.1249	-0.2873	0.3565	-0.4437	4.1486	1.0151	-0.6102	-2.2656	0.09659	-1.4222	0.4592	-0.542	0.4625	-2.3527	0.5455	0.0153	0.5926	-0.9247	-1.2104	2.0585	0.9599	0.2873	0.2489	-0.4176	0.315	-0.0987	0.4789	-0.01526	-0.3422	-2.3312	0.6101	0.08792	-3.3018	-0.5164	0.7136	-1.3312	0.7908	0.5039
CCNB1	0.1574	-5	0.4515	-0.103	-0.104	0.02858	0.003	0.6765	0.448	1.2238	0.5459	0.228	-3.4604	-4.8161	0.6814	-1.3309	0.3132	0.8762	-3.5428	0.9311	-0.7418	0.1277	0.9113	0.1615	-0.4684	0.1587	0.1758	0.1645	-0.01291	0.6966	0.818	0.386	0.6758	0.7541	-1.6063	2.0896	0.6849	-0.1793	1.0107	0.7322	0.228	0.1764	0.8648	-3.5661	0.02363	0.5269	0.8277	-1.0493	-2.729
TBP	-0.9432	0.5297	-0.3828	1.2247	-0.09255	-0.1509	-2.6754	-1.0196	-0.5996	-0.7076	-1.0013	-1.1306	-0.4737	-0.8701	0.8266	-1.6721	0.2339	0.1249	-0.2412	-0.8668	-1.0427	-1.4632	-0.8286	-0.2101	0.3506	0.03102	0.1106	-1.0479	-0.4928	-0.8192	-0.3841	0.3795	-1.2894	0.4288	0.2625	-1.0123	-0.07271	0.7066	-0.9134	0.2993	-0.0117	-0.08158	-0.01234	-0.1164	0.2502	-0.8312	1.3846	0.8845	-1.5633
SLC2A6	0.4014	1.6231	1.0747	0.8022	0.7272	0.2268	1.01	0.7019	1.0961	0.283	0.6071	-1.0301	0.4341	2.6309	0.8613	1.4558	-0.1749	-0.9734	4.2965	1.3328	-0.2548	-1.6914	0.2806	-0.4514	-2.4761	-0.33	0.7463	0.9191	-0.4762	0.2859	0.4608	0.7858	0.324	0.8573	-1.1996	-0.216	-0.3307	0.254	1.24	1.046	1.8644	0.2715	-0.7989	-2.5203	-2.9	-0.0549	-4.1227	0.002251	0.2326
WFS1	-0.2083	0.3331	2.892	-0.2722	0.4665	-0.4124	-1.5162	0.2292	0.146	0.5995	-0.00125	-0.6354	-0.4866	3.0333	0.9476	2.6685	0.2591	-0.2389	-0.9112	0.2211	1.1385	-0.6857	0.1422	1.6327	-0.463	-1.3386	-0.1033	-1.1279	-0.01327	-0.05139	2.4912	0.05455	3.7992	-0.9705	5.1738	2.2924	2.7203	1.4825	-0.3223	0.418	0.2698	0.4641	-0.3637	0.1349	1.8858	0.6654	0.5957	3.1531	2.508
EZH2	0.09142	0.01065	-1.1127	-0.4216	0.0334	-0.1169	-0.4437	-0.5384	0.221	-0.4234	0.6221	-3.4223	0.4891	0.4154	-0.0853	-3.1694	0.1847	-0.09329	-2.2812	-0.2916	-1.5335	-1.1114	0.7306	0.5998	-1.9099	-1.4004	-2.4307	-0.9791	0.2809	-1.3573	-0.1801	0.672	-2.2624	-0.4404	1.5593	-0.201	-1.7914	-0.2025	0.05372	0.6899	0.2036	0.007425	0.3321	-1.1593	-0.8958	0.2082	-2.1314	-1.2061	-0.8032
UBE3B	0.4344	-0.4268	0.6026	0.4393	-0.05275	-0.5841	2.1449	-0.8558	0.06693	-0.1637	-0.0709	5.0467	0.7042	0.9803	1.7752	4.2387	0.9982	1.2596	-1.2123	-0.09395	-0.413	-0.106	1.0761	0.4288	-0.7965	1.0008	0.9567	0.7568	2.0326	0.5435	0.35	0.4241	2.0434	0.4579	1.6811	-0.5701	1.4618	-0.4175	-1.1201	0.4919	-1.3616	-0.3479	-0.7049	-0.3268	1.2704	-0.04676	-1.6445	1.4274	1.211
ICAM3	1.4327	0.8674	1.2874	2.0004	1.9464	0.7984	-0.3839	1.8131	1.3738	-0.3506	1.2096	1.2577	0.7515	-1.1251	1.1862	-0.06951	-0.3259	-1.3709	0.3983	-0.08512	1.081	3.0496	4.1437	0.2566	0.8245	1.4548	0.2541	1.3572	0.4397	-0.8036	-0.02512	0.3215	0.7633	1.9196	-1.1293	0.4324	1.483	0.9593	1.538	3.1207	3.1265	0.01959	1.9432	1.4077	0.6347	1.0644	2.2754	1.2507	1.2347
NPDC1	-1.0319	-2.7283	-2.3155	-4.4353	-2.7246	-2.8119	-0.3769	-5.4454	-2.4392	-0.1527	-3.0709	-4.0401	-1.5008	1.4171	-3.6193	1.6965	0.3271	1.0806	1.3486	-1.0988	-1.9196	-2.228	-4.8335	-1.7554	-0.1353	-3.3706	-0.6246	-1.8208	-3.5458	-0.008789	-1.3444	-1.2894	-2.2563	-2.7069	0.8063	-1.906	-2.5747	-1.6768	-1.6625	-4.4044	-5.3583	-1.2259	-1.2521	1.0815	-1.7574	-1.9426	-1.511	-1.4623	-1.2704
ALDH7A1	-2.1001	-0.8058	-4.6628	-3.4197	-0.1781	-0.9501	0.9328	-1.3522	-1.2116	-0.156	-0.9948	0.3928	-3.5463	1.4253	-0.4452	2.105	-1.0502	-0.6639	-5.3721	-2.0165	-3.0789	-10	0.2622	-0.8207	-1.0301	-4.6983	-1.9011	-3.8316	0.7063	-4.5769	-0.7516	-0.5112	-5.6971	-2.3316	-1.3697	-2.2043	-1.7532	-1.6378	-3.0446	-1.2082	-1.6271	-2.0156	0.2255	-1.3461	0.06316	-3.0337	-4.8198	-0.6096	0.5926
BRCA1	0.7167	-0.8096	0.1799	1.582	-0.605	-2.2031	-2.4024	0.4143	-0.2395	-1.8369	-0.5666	-0.2201	0.8634	-0.556	-2.1974	-0.1451	-1.4262	-0.03835	0.6643	-0.2991	1.1969	0.7098	-0.1733	0.3138	-0.1641	2.4983	-0.5093	1.5553	0.03	1.4658	-1.47	-0.9961	3.1408	0.5054	2.2401	-0.3	0.6283	0.7584	-1.8613	0.5916	-1.6946	1.3128	-0.2195	-1.7975	-0.1776	1.5151	1.1681	-1.6685	-0.7188
NFATC3	0.1153	-0.4147	-0.6095	-0.2125	0.4831	1.896	0.8831	2.841	0.4691	0.3793	0.8222	-0.5092	0.04126	0.6723	4.9197	2.5762	0.8122	1.4151	3.0707	0.7413	-1.0568	10	0.5114	0.9087	2.46	0.2983	-0.1108	0.1346	-0.5824	1.308	3.0653	-0.09702	-0.1736	-0.292	1.6436	1.2133	-0.2982	1.3372	0.06542	-1.0116	-0.5663	0.2444	-0.6446	-2.1501	0.1867	-0.2952	3.2652	0.0007856	0.8468
PSMD4	-0.6456	-0.2709	-0.8666	-0.5049	-0.209	-0.4022	-0.4279	-0.175	-0.7552	-0.7788	-1.055	-1.6258	0.5084	-2.7442	-2.7491	-0.4099	-0.2384	-1.326	0.5612	-0.465	0.028	-1.9495	-0.1586	1.7891	0.3491	0.08679	-1.6559	-1.0209	-0.1417	-1.541	-1.1434	-0.06128	-0.002083	-0.1923	0.1218	-0.2191	0.1773	0.4518	-0.5276	-0.5347	-1.7083	-1.3286	0.4522	1.4321	0.9275	-0.8297	1.2538	0.3386	0.1833
PCNA	0.4783	0.5686	-0.3932	0.3885	-0.0931	-0.1591	-0.6398	-0.5236	-0.8517	0.376	2.1	-0.9982	0.05444	0.12	1.6181	-3.2758	0.5162	0.1614	-4.3597	0.2534	-5.4967	-1.2498	0.5811	0.4183	-0.6641	-0.09726	-2.0193	-1.0064	-1.2624	0.8014	0.4026	-0.06287	0.2254	-0.09727	-1.5263	-4.1791	0.0144	0.1488	0.2529	1.9195	2.1985	-0.6237	-0.05227	-2.8849	-0.6759	-0.5659	-1.6973	-2.5824	0.1027
PHKG2	-1.2531	1.1178	-0.3271	0.1187	0.8841	-1.1311	-0.79	-0.05755	-0.08166	-0.6604	-0.07745	-1.0947	0.1617	-0.5428	0.4145	3.5927	0.1764	-2.489	-1.7461	0.07534	0.9075	-0.9989	1.3596	0.2437	-2.2995	-1.6872	-0.615	-0.5773	-0.716	-0.5503	0.576	0.3638	-0.237	-1.3209	0.5245	-0.03552	-0.2952	-0.3579	-1.1776	0.2165	0.0952	1.0098	-0.0743	-2.1586	-2.2882	-1.1551	0.4738	-0.3253	-0.7522
ETV1	-0.06485	-0.3868	-0.5696	0.2455	-0.0985	-0.06217	-0.1547	-0.1997	2.561	0.7636	-0.0156	-0.1041	2.7069	2.9772	2.4106	3.7048	-0.4541	0.2688	-0.978	-0.03041	3.5346	0.3149	-0.02385	0.1528	6.1234	-0.08215	3.7159	2.3436	0.4174	1.5817	-0.08777	-0.7725	-0.3587	4.0571	-0.08799	-0.1861	3.2481	0.3726	-0.3191	3.82	-0.4277	0.3566	-0.4481	8.9515	3.482	-0.5574	3.1509	-1.1531	-0.3477
POLR2I	1.837	0.7631	0.5504	0.422	1.0221	-3.3637	-0.7551	0.655	-2.5002	1.0886	0.9546	-0.142	-2.6803	-3.1522	0.8735	-2.8102	1.1463	0.5265	0.5594	0.5898	-4.2506	-0.5393	-0.5997	-0.2161	1.0436	-1.1725	-2.9554	-3.2084	-0.0267	0.6148	0.373	0.391	-0.08762	-4.3877	-0.3022	0.825	-3.9586	-1.0095	-0.2635	-3.1732	-0.275	-0.3147	0.101	-2.7334	-3.6048	0.2981	0.7203	-0.2772	-0.6274
KDM5B	-0.6216	4.688	0.6839	0.451	-0.8483	1.0044	-0.1951	0.006062	0.5547	0.01125	-0.1615	-0.4234	3.0085	-0.9458	0.1166	2.9333	1.4294	0.4147	-0.6099	0.7181	-0.506	-0.8586	-0.6208	0.2747	-1.2781	-0.577	-0.5237	0.06481	-1.2594	-2.4625	0.7845	-0.06111	-0.1743	0.2678	-0.6112	0.1098	0.2067	1.3994	-1.4058	0.005023	0.4448	-0.06009	0.07665	3.1545	-0.08339	0.686	0.6762	-0.09817	-0.7023
PSMB8	-0.7346	-3.4179	-0.42	-1.2847	-0.2706	-0.1577	0.012	-1.0126	-0.8757	0.0216	-1.3014	0.5864	-2.9671	-0.4581	-0.507	-2.307	-3.6362	-1.3508	0.05413	-0.6457	0.5849	-1.3031	-0.0191	-0.577	-0.1573	1.1726	-0.1529	-0.3588	1.8804	0.2538	-0.8518	-0.2231	-0.1147	-0.003182	1.2027	-1.0447	-0.005443	-1.5149	-0.8351	-0.597	0.4299	0.595	0.1867	-2.764	-0.4683	-0.26	-1.852	0.7974	-0.1046
AKAP8L	-0.6851	-1.5454	1.5637	-1.4371	2.0578	1.9508	-0.2341	1.5654	0.3628	1.8255	-0.03185	-2.7136	-0.9674	-1.1775	-2.0506	2.5522	0.8769	0.3341	-1.0776	1.7405	-1.9033	-0.0453	-1.1681	0.4324	-0.2556	0.3148	0.3524	0.0122	0.05657	-1.1802	-0.0939	-0.6599	-0.4058	2.7935	2.5693	1.3516	0.5924	0.3901	-1.7172	-0.4336	1.4058	-0.8089	-0.2814	0.2847	1.464	-1.0591	-1.023	0.1632	1.188
COG4	-0.4782	-0.9873	-2.2251	-1.9555	0.0526	-2.5201	-0.8868	-1.6689	-1.2061	-3.6086	-0.7227	-2.4772	-0.2556	-2.2604	-0.5147	-2.2314	-2.8349	-0.06014	-0.7339	-0.2363	0.1724	-0.6028	0.7107	0.2394	1.5648	-1.5299	-0.2885	-0.7015	1.2989	-0.8392	-0.842	0.1473	-1.6659	-2.0106	1.0475	-0.2967	0.0213	-0.3683	-0.8438	-0.2939	-0.716	-0.6638	0.332	1.8507	-1.1324	-0.4247	1.0465	-0.376	-1.1684
MCM3	-0.9083	-0.5057	-0.8814	-1.0445	-0.2726	-0.2528	-0.6725	-0.1693	-0.16	-0.3799	-0.4471	-0.4874	-0.1191	-1.3631	-0.6684	-0.02267	0.6454	-0.5911	-5.2055	-1.02	-0.0932	-3.1832	-0.02125	-0.4744	-0.6466	-0.6708	-1.776	-1.1809	1.969	-1.103	-1.0015	-0.6386	-0.8921	0.07348	-2.2824	-3.337	-0.2326	-0.3622	-0.7418	-0.02753	-0.5533	-0.1192	-0.1522	-1.3204	0.02105	0.001524	-3.9948	-0.9589	0.1834
PLEKHJ1	-0.9369	-0.2202	-0.5685	0.4776	0.5039	2.7205	1.0526	0.03585	0.1044	-0.5655	1.1193	-0.5215	1.2499	1.3475	1.1818	4.0296	0.2219	-1.6739	2.2271	0.4126	0.174	0.5106	0.6492	0.5033	0.7732	0.08812	-0.3414	-0.2168	2.3746	0.9009	0.5308	0.4611	-0.9222	-1.1037	2.1621	-0.3301	0.3106	0.002653	-0.1739	0.5083	-0.5468	1.6586	0.08308	0.645	0.1258	-0.25	2.0036	-0.5379	-0.2985
HAT1	0.6352	0.3929	0.7576	0.08085	0.1548	0.6618	0.2817	0.2924	0.4656	-4.7747	-0.5181	0.7242	1.0332	0.4539	-0.0474	-1.3159	0.3298	-1.3557	-4.0835	-0.3386	0.3451	-0.9644	-0.9151	0.5037	-1.6837	0.8126	-1.2344	0.1032	0.2194	-1.8611	0.08432	0.9239	0.5059	0.363	-1.5141	-4.0408	0.4002	0.8354	0.004043	0.2504	-0.06815	-0.2404	0.3235	-2.7874	-0.1706	-0.9297	-1.3247	1.0908	-0.1964
TERT	-0.154	-0.9003	-0.7084	-2.386	-0.5884	-0.4922	-1.307	-0.4846	0.6849	1.3375	-1.0538	0.6714	-1.4008	0.9106	-0.6073	3.4048	-0.4221	0.2668	-0.4564	0.6291	-0.8978	0.2575	0.1727	-0.3457	0.4866	-0.8124	0.4325	-0.2184	0.1409	0.8621	0.291	-0.3912	-0.3112	-0.412	0.199	-0.03397	-0.8955	-0.5271	0.3472	0.9388	0.3928	-0.2564	-0.1915	-1.2052	-0.7298	-0.8207	1.122	-1.403	-0.1579
G3BP1	1.5494	0.3951	0.8569	0.4776	0.5382	0.94	-0.6165	0.812	0.3141	0.5224	-4.7499	0.7373	0.3922	-1.2705	0.0916	-3.7806	-0.4612	-0.4447	-2.5901	-0.9724	-1.8429	-1.2942	0.01015	-1.5032	-1.6319	1.3176	0.0008399	-0.1118	-1.0309	-3.6936	-1.0094	0.1396	-5.4161	0.8347	-1.9606	-2.7677	0.2345	0.2566	-0.154	0.4936	0.5865	-0.002052	0.194	-2.9866	0.3672	0.05789	-6.0391	0.4749	-0.8408
SNX13	0.428	0.1999	0.4614	0.03285	-0.4171	0.6875	1.1279	-0.179	0.6332	0.283	1.2576	-0.1752	1.3592	-0.9481	-0.03365	3.5794	0.4705	-1.0391	-1.0722	0.338	0.3428	-0.6082	-0.825	0.9533	0.153	0.2876	-0.4819	1.532	-0.01964	3.3833	0.5785	-0.01491	-0.09948	0.1854	-1.0685	2.6306	0.7947	0.6697	1.5065	0.2719	-0.1222	-0.2017	-0.2541	0.04738	0.7336	-0.7907	-1.1638	-0.3704	0.9117
PAK4	-0.1861	-0.09425	-0.3042	0.08925	0.9701	-0.7803	-0.3541	-0.306	0.1201	-0.2616	-0.552	1.8022	0.2681	-0.997	0.1702	0.1978	-0.2094	0.1189	-0.1758	0.1767	0.2532	-0.3009	0.9911	0.3305	0.6883	0.04039	-0.15	-0.2368	0.06325	-0.1213	-0.6296	-0.3873	-0.09406	-0.5563	0.4707	0.569	0.2702	0.5625	-0.3551	1.5921	-0.2995	-0.5975	0.04895	1.0155	0.3963	0.3238	0.9586	-0.3661	0.8152
TPD52L2	0.8767	0.5717	0.7344	0.9172	-0.5699	0.1141	0.2238	0.5985	-0.3024	0.4584	0.7171	-2.9969	-0.4439	1.1202	-0.6766	0.5489	0.5995	0.9821	1.3573	0.6406	-2.0164	1.8581	-2.0596	-0.88	0.4427	-0.5556	1.0263	-0.955	-0.1888	0.8792	1.431	0.287	0.2362	0.3803	-0.3261	-0.8412	-0.8612	-1.3967	-0.7577	-2.1814	0.3704	0.5341	-0.5346	0.06717	-0.6951	-1.3586	0.4159	-0.1391	-1.7588
DPH2	-0.5632	-0.1435	0.4292	0.5174	-0.3208	0.1406	-0.3961	-0.4659	-0.921	0.1436	-1.4146	0.5884	0.4989	-0.7678	0.563	-1.1236	0.1781	0.01406	0.2585	-1.8778	-2.0588	-0.4201	-0.8941	-0.6057	0.06157	-0.2471	0.2701	-0.688	-1.1856	-0.7185	0.6432	-0.6887	-0.7432	0.4219	0.285	-2.8158	-0.2974	-0.6557	-0.403	-0.7469	0.2878	1.0318	-0.1621	-3.2348	-0.01424	-0.575	-0.1825	0.00351	-0.8429
PIH1D1	0.5816	0.1434	-0.3125	-0.5454	1.041	-0.7402	-0.115	0.7569	0.5537	0.4336	0.9484	-0.4203	-0.7743	-0.4669	0.2966	1.5638	0.9449	0.9023	-0.6422	0.9369	2.0539	1.0292	1.0433	0.05564	-1.0456	-0.5343	0.09321	-0.1882	0.1169	0.7317	0.6859	0.36	0.9829	-0.4018	-0.3628	0.2283	0.04617	-0.3915	-0.217	-0.2745	-0.447	0.5902	0.5757	-0.1015	0.7317	-0.3853	0.6723	-1.0046	-0.1904
PRKCQ	2.8331	-0.4784	-0.1082	4.8171	-0.669	2.6141	5.042	0.3181	0.8011	-0.2704	-0.7406	0.3048	2.5864	3.0256	-0.09955	2.9951	-0.3257	0.8106	2.3136	3.4703	0.05185	4.9823	0.3534	1.7616	0.2802	-0.4928	2.6349	3.922	3.9336	0.2599	-1.527	-0.5422	4.7589	3.4985	3.8594	4.1547	0.6192	3.7242	0.2913	-0.7756	0.3524	-0.4935	2.5325	6.5651	3.3334	-0.4407	0.4621	4.3095	2.5694
SNX6	0.362	0.9821	0.9201	0.4252	0.6126	0.993	-0.3994	1.102	0.5571	0.4789	0.7358	0.8316	1.2836	0.2848	-0.207	-1.9914	0.3214	-0.7172	1.122	0.7257	-0.4682	1.9465	-0.6586	0.4184	0.6252	0.7208	0.3161	0.2635	0.1533	-0.1447	0.3479	0.6295	0.8688	0.3159	-1.616	1.7136	0.9144	0.3478	0.9213	0.9334	0.2526	0.09059	0.4404	0.5751	-0.4728	-0.5264	-0.5551	-0.464	0.3964
EED	-0.2281	0.538	-0.6083	-0.3195	-0.2619	-1.7246	-0.5375	-1.0368	0.2751	0.8583	1.0483	1.181	-0.1223	0.2354	0.5297	-2.6976	0.005667	0.8969	-1.7197	-1.7727	-0.1461	-1.4158	-0.2546	-0.8298	-0.8925	0.4049	-0.08942	0.4737	1.0162	-0.9517	-0.7447	0.2778	0.1188	-0.2018	-3.2155	0.3635	-0.06603	-0.3203	-0.9044	0.3774	1.4709	-0.2671	0.1303	-2.5	-0.8166	-1.1921	-1.8552	-1.0738	0.1168
SHB	0.2449	-0.8475	0.8586	-0.5454	-0.2153	1.343	0.7349	0.1572	0.04371	0.409	0.3183	-0.7989	-0.4891	0.6447	-0.1999	1.8671	0.3127	0.9407	1.315	0.6563	0.07035	0.922	-0.3423	-0.122	0.6982	0.09668	0.6841	-0.1479	0.07977	0.6198	0.8849	-0.05713	-0.09187	-0.4801	2.0309	-0.2832	0.8848	0.003495	1.1023	-0.1599	-0.4236	0.5955	-0.3938	-0.04897	-0.87	-0.541	-0.3771	0.2642	0.7171
UTP14A	0.0279	-0.1755	0.4449	0.4913	1.4325	0.2359	0.0538	-0.1144	-0.2734	0.5227	-0.6888	-0.2807	-0.97	0.08229	-0.02155	0.2895	0.1551	1.1722	0.2358	-0.5454	-0.7711	0.2243	0.2238	0.5231	0.6447	0.6052	0.08265	-1.1185	-0.4636	-0.4421	-0.1439	0.7704	1.1655	1.0631	1.1203	-0.2405	-0.4637	0.3838	-0.0506	-0.3063	0.1336	-0.3394	0.4045	-0.2366	1.9168	-0.02253	-0.4839	0.5121	-0.798
WIPF2	-0.946	0.4555	-0.5672	-0.924	-1.1094	-0.6315	-0.7555	-0.2609	-0.03199	-0.316	-0.1823	1.2845	0.07502	-2.1872	-0.8975	-0.458	-0.3546	-1.4848	-0.5002	0.284	0.8271	-1.2622	-0.3986	0.242	-0.5371	-1.3673	-0.03816	-0.2995	0.0733	-0.4262	-0.6813	-0.7445	-1.9001	-0.5591	0.225	-0.2946	0.3224	-0.002473	-0.9652	-0.7106	-1.2969	-0.5225	0.004223	-0.8296	-1.2789	0.3054	0.6407	-1.2666	-0.03752
NENF	0.9671	0.6144	0.3194	0.48	0.5979	-0.1409	-1.1216	1.0845	0.3155	1.1377	1.2343	0.8574	0.2657	3.0959	0.0782	-2.0271	0.04855	-0.1394	1.0636	0.6762	-0.7595	-0.0149	-0.728	-0.92	-1.9598	0.4602	0.09102	0.4025	1.1246	-1.1716	-0.2642	0.9127	0.9559	-0.1212	0.1785	2.6753	0.4927	0.1375	0.7964	1.0173	0.4255	-1.2344	0.5458	-2.7822	-0.5867	0.2837	-2.0348	0.3342	0.6475
TSEN2	1.4886	0.605	-0.2652	-0.1528	0.77	-0.653	-0.0833	1.7517	0.155	-0.4495	0.4849	0.2964	-0.2519	-1.4379	0.9684	1.76	-0.8201	0.1569	-1.7541	-0.1612	-0.6559	0.0115	1.0322	0.1018	0.6889	0.02398	-0.2391	0.685	-0.07018	5.2818	-0.4639	3.4326	-0.1362	-0.02834	0.9221	1.3052	-0.5776	-0.2233	-0.2861	0.486	0.1752	-1.0811	0.6236	-1.8024	0.24	1.2016	2.203	-0.596	-0.05563
RPN1	-1.8539	-0.6121	-0.2223	-1.1051	0.3881	0.07008	-0.4893	0.4586	-0.7045	-0.3363	0.4168	-0.2455	-0.6169	0.1666	0	-3.2386	0.662	-0.7071	-0.7045	-0.6075	3.2601	-0.7467	0.00675	-0.5675	-0.4436	0.2056	-0.4986	-0.4489	0.7483	0.2031	-0.7147	0.4869	-0.7746	0.5634	0.09632	0.4043	-0.09791	-0.2646	-0.4724	0.1977	0.2546	0.1843	-0.4594	-1.0879	-0.2359	0.3785	-0.4774	0.3214	1.6068
SUV39H1	0.7916	0.3611	0.128	0.2834	0.2864	0.1602	1.2749	0.2471	1.1926	0.03145	0.8418	0.8527	1.8251	-3.0676	-0.0302	-2.8502	0.4392	-2.3819	-2.1092	-0.7705	0.2534	0.05105	-0.3894	0.7309	-0.185	1.1364	0.3581	-0.2515	-0.835	-1.0056	-0.1146	-0.6654	0.6104	1.0299	0.537	0.889	0.4009	1.2559	0.08294	0.5355	-0.08825	0.4344	0.2599	-1.9472	1.1603	-0.2482	-0.9474	0.2145	-0.1927
C2CD2L	0.9392	-0.4324	-0.3388	0.1325	-0.4049	-0.9587	-1.021	0.651	-1.279	-0.8074	-0.8528	0.2016	-1.4965	0.07426	-0.3189	3.3935	-0.2095	0.509	0.1584	0.231	5.1666	1.4691	-0.5225	-0.4356	3.8047	-1.1353	0.04647	-0.5771	-0.3098	0.6599	0.9919	-1.1143	-0.7597	-0.4789	1.317	-0.3263	-1.3343	-0.5435	-1.2947	-1.7943	-0.6146	0.3423	0.2244	0.4043	0.3752	-0.2717	2.1887	-1.0039	-0.123
LYPLA1	1.5042	0.9634	0.1862	0.3048	0.3664	0.2123	-0.6435	0.4571	0.5787	-0.024	0.2657	0.4065	0.9654	-0.002856	1.2959	-2.3558	0.2916	-1.5137	3.1505	-0.5244	-5.1399	0.8814	-0.5465	-0.7975	0.4707	0.9337	0.04583	0.4399	-1.2605	1.22	-0.6924	0.2076	0.02244	0.9676	-1.6271	0.1492	-0.5403	0.6612	0.2831	0.683	-0.0654	-1.062	-0.07196	4.7585	0.5441	-1.068	0.7564	0.4164	-0.5302
BIRC2	-0.4124	0.1738	-0.871	-0.8489	0.0616	-0.6607	-0.6103	-0.4219	-0.7012	-0.3837	-0.4733	0.0922	-0.3437	-0.3011	-0.5615	-1.0988	-0.7215	0.7263	0.8413	-0.8908	-1.6154	0.9231	0.2984	-0.2359	0.3949	0.3846	-0.4553	-0.1604	-0.4146	0.931	-0.2213	-0.5722	-0.1555	-0.5827	0.1663	-0.4044	-0.8176	-0.217	-0.5977	-0.8831	0.04165	-0.3188	0.0649	-0.1484	-0.3203	-0.3277	0.1823	-0.1557	-0.4715
GABPB1	-0.2914	-0.6173	-0.3174	0.9111	-1.0883	-0.2687	-0.8346	-0.414	0.02297	-0.2238	-0.4013	-1.2173	-0.3686	-1.6802	-0.2476	-0.4245	0.7626	-0.5053	-1.1575	-0.0133	0.658	0.104	-0.3343	0.3307	-1.7727	-1.0163	0.5952	-1.3131	-0.3662	-0.9835	-0.3375	0.2759	-1.2791	0.2608	-0.3391	0.6539	-0.01925	-0.02357	-0.636	0.1801	0.2032	0.137	0.4777	-0.951	0.7632	0.07239	0.007708	0.07997	0.5005
MAP2K5	-0.2662	-1.0839	-0.7441	-0.7721	-0.1996	-1.2823	-1.2778	-0.342	0.1994	0.5232	0.03695	-0.7885	-0.8326	1.9067	-0.633	3.4987	-0.1984	0.5811	-0.8649	-0.04151	-2.2572	0.07835	0.583	0.4895	0.8147	-1.4796	-1.2178	-0.9658	-0.03707	0.763	-1.8301	0.03716	0.8605	0.09681	1.5855	-1.6914	-0.3899	-0.1951	0.1361	0.07787	-0.6881	-0.5722	0.6598	0.5047	-0.3227	-0.1606	-0.6525	-1.0697	0.7336
POLR2K	0.4906	0.794	0.3308	-0.4557	0.3488	-0.3215	-1.8294	-0.4513	0.3436	0.6324	0.3594	0.5895	0.07807	-0.712	0.8855	-4.1093	0.06877	-0.02534	-1.9609	-1.0976	-0.8418	-1.0253	-0.2678	-0.08323	-1.22	0.621	-0.5857	-0.3096	0.06866	-1.0411	-0.6219	0.238	-0.07395	0.5361	-1.8092	-1.7086	0.09478	0.4915	0.04415	0.7291	0.6458	-2.0861	-0.07693	-1.8037	-0.1652	-0.9626	-2.1051	0.4051	-0.2233
PTK2B	1.5352	-0.9809	0.5914	-0.9078	-0.453	0.3934	1.1763	0.05152	1.6143	0.8391	0.9563	0.0253	0.6007	1.3633	1.2864	4.3459	0.3514	0.8937	1.5281	1.0302	-0.2902	0.9718	-0.0485	0.4786	1.4341	-0.01666	-0.1578	0.04797	1.025	2.176	1.0366	0.2848	0.3436	-0.0268	-0.1629	-0.823	0.06469	0.2579	1.1699	-0.1002	-1.0692	0.6076	-0.1487	1.075	-0.6569	-0.9169	0.4822	-0.2083	0.8215
PUF60	-0.7347	-0.3828	-0.2437	0.7618	-0.1295	-0.5654	0.1248	0.4129	-2.0227	-1.2653	-0.1295	-0.4006	-0.2602	-1.8397	-0.09915	-3.6981	1.0133	0.06427	-0.1613	0.2792	-5	0.3676	0.2182	-1.0161	-0.2966	-0.4774	-0.5232	-0.9864	0.3035	0.2458	-0.09099	0.07105	-0.0006765	0.2862	0.9814	-2.8368	-0.5656	-0.545	-1.549	-0.5071	-0.0216	0.2598	0.4606	-0.2615	-2.5046	-0.959	1.4219	0.07827	-0.4611
DHRS7	-0.48	-0.4674	0.04005	0.8699	0.7153	0.2401	-1.5029	-0.6567	-0.4346	-0.7017	-0.8246	-0.8833	-0.9254	1.2407	-0.828	-0.9131	-0.5748	-0.3576	0.8355	0.922	-0.00485	1.1625	0.0086	0.2499	-0.2712	-0.5777	0.4556	-0.6813	0.2526	-0.9368	-0.5146	1.3696	0.7313	1.2427	0.4586	-0.9699	-0.5514	-0.07329	1.5565	-0.1918	0.7134	1.3443	0.6543	0.2254	-0.09759	-0.3095	2.1396	0.4335	0.8771
PAF1	-0.9615	-0.04185	-1.1431	-0.247	-0.7254	-1.0455	0.2889	0.3515	-0.3992	-0.1101	0.4111	-1.1556	0.2495	-1.0405	-0.03795	2.9096	0.02931	-1.314	-0.06875	-0.349	-0.6307	-0.02065	0.05525	0.6006	-0.3249	-0.1859	-0.2296	0.1645	-1.0211	0.02183	0.8367	-0.522	-0.5735	-0.9395	0.07497	0.07651	0.1266	0.0003668	0.08843	0.2088	-0.4029	-0.202	-0.2237	0.1371	-0.1756	-0.8484	-2.4706	-0.4407	-0.1696
ARID5B	0.02284	0.00565	1.0442	0.7019	0.4449	-0.2472	1.0904	-0.2868	0.4029	-0.4335	-0.5992	-0.1528	-0.4564	-0.9436	-0.5293	0.7926	0.2124	-0.1087	-1.4777	0.8274	0.4776	0.8262	0.6931	0.7376	-0.8483	1.2716	0.4914	-0.5676	-0.3044	-0.6976	1.5876	0.9447	0.3593	1.009	-0.812	-1.479	-0.3657	-0.07858	-0.3838	0.2356	0.6399	0.6051	0.8484	0.6017	0.7856	0.07727	-1.717	-0.5157	-0.3287
POLR1C	0.7066	0.5081	-0.003159	0.09565	0.8851	0.6249	-0.1646	0.3087	-0.1047	0.2013	0.233	0.5709	0.4819	-0.4602	0.2118	1.2336	1.1327	0.3305	-1.5516	-0.5515	-0.7458	0.4142	-0.2008	-0.5848	-0.1109	-1.0494	0.3149	0.09471	-1.2292	-0.4929	0.4192	-0.3621	-0.3967	-0.197	0.7682	1.7606	0.4043	-0.9893	0.2743	-0.005617	-0.5236	0.3888	0.4828	-3.393	0.4071	-0.4589	-0.464	0.2946	-0.8007
PAK1	-0.9785	-0.7419	-0.7704	-1.3737	4.4563	-0.575	-1.6273	2.2094	-0.4646	-0.6062	5.3681	-0.8298	-0.9136	-0.7799	-0.1107	3.0552	-0.5602	-1.2004	0.6712	-0.6005	-1.2571	-0.461	-0.4628	-0.1672	0.08496	-0.7665	0.2558	-1.7813	-0.04995	-0.4168	-0.09808	-0.7881	-0.4091	-1.4624	1.2467	1.0785	-0.8473	-0.8215	-0.5339	-1.0568	0.2939	-0.1764	-0.1714	-0.3581	0.3379	0.725	3.1654	-0.00221	-0.8833
RUVBL1	1.1957	0.1173	0.9587	0.8632	0.6586	0.0212	-0.5748	0.5246	-0.3969	-0.372	0.9898	-0.6447	0.02179	-1.8087	0.5129	-0.4667	1.3603	0.2944	-1.7606	0.6538	-0.1294	-0.3232	-0.6316	-0.1979	-0.1535	-0.06931	0.4736	0.5301	-0.2288	-0.7781	-0.1313	-0.007414	0.4764	0.1008	0.5877	-3.1245	0.04032	-0.3845	-0.9982	-0.285	-0.1856	0.8266	1.0286	-1.4302	0.02145	-1.1872	2.2036	-0.9199	-0.7355
AKT1	-0.3112	-1.1374	-1.2239	-0.9595	-0.2304	0.2073	-0.4039	-0.007895	-0.3749	-0.6344	0.3521	-0.5383	-1.2481	0.1391	-0.3728	-3.3995	-0.5301	0.5426	0.1996	0.1072	-0.07085	-0.5061	-0.3061	-0.5505	0.6157	-0.1352	0.1036	-0.7882	-0.5973	-0.3863	-0.759	-1.218	0.2077	-0.2609	1.1446	-0.2959	0.2385	-0.5988	-0.4799	-0.2545	-0.2756	0.6453	-0.4299	-0.2008	0.07352	0.6351	-0.3578	-0.004829	-0.8281
CDC42	-0.6693	1.1804	0.3986	0.9812	0.5168	-0.603	0.3923	-0.2492	0.4884	0.1977	-0.4543	0.142	0.8242	0.5673	1.7818	-3.3672	0.4732	-0.3483	0.5996	-0.3991	-0.4347	5.8814	0.3727	-0.2904	-0.793	-0.3956	0.271	0.8885	0.5644	0.298	1.1503	0.8765	-0.2427	-0.5253	-0.9056	-1.2271	-0.7003	-0.05593	-0.02944	0.6395	0.6181	0.1582	4.5689	-0.6372	-0.2202	-0.4341	0.9607	-0.3889	0.05761
IGHMBP2	0.04605	-0.249	0.7222	-0.8923	0.2782	0.00332	-0.5546	1.5673	-0.8229	0.2504	0.1077	0.0519	0.1984	1.5467	1.6205	3.1268	1.0976	1.0093	2.1308	0.9195	0.2652	0.8359	2.793	0.9041	0.4579	0.2581	0.9277	1.1387	-0.4365	2.3204	0.5566	0.4204	5.6152	0.07587	2.8544	1.7188	-0.2511	-0.4703	0.5559	-0.056	0.4637	1.1578	-0.1805	1.1602	-0.08117	5.7222	2.0755	-0.6723	-0.06163
SENP6	0.9045	0.6098	0.8804	1.209	0.7012	0.9544	1.0044	0.8796	0.8221	0.2085	1.2622	-0.1739	1.2226	0.4003	-0.3214	2.324	0.7542	-0.2067	-0.4783	0.8606	1.3479	0.3523	-0.3507	0.2222	-0.3364	1.0836	-0.4984	0.8571	-0.213	-0.9264	0.6073	0.2794	0.9974	1.0933	-0.7913	0.8335	0.1543	0.6838	0.6579	-0.09239	-0.4018	-0.6905	-0.1184	-0.5627	0.6212	-0.7696	-0.03124	1.1258	-0.2139
ADO	0.9192	-0.7298	-0.7443	-1.0122	-0.4453	-0.3808	-1.2204	-1.2979	-0.2864	-0.4863	-1.2915	1.1173	6.9675	0.08858	-0.4654	-3.9108	-0.09251	-1.1199	-0.1396	-1.6377	-1.0187	-2.2123	1.3077	-1.2867	0.3095	-0.5389	-0.03113	-0.4192	0.5225	-0.2331	-1.2665	-0.8657	-0.672	-1.3677	1.4967	0.0284	4.0353	0.259	-0.5293	-0.6177	0.5134	-0.8213	0.1263	3.1776	0.2524	-0.2664	1.396	-0.1172	-0.7144
HSPB1	-2.3966	-0.5737	-0.3416	1.6303	0	-1.0499	0.07825	-0.2861	0.02529	-0.6687	0.2066	-1.4389	0.3663	-1.6015	-1.986	-3.4747	-0.07598	0.04982	4.6456	1.3221	-0.6212	-0.3541	-0.6003	0.7597	-1.3433	-1.788	0.1118	-1.0536	-1.3928	-2.3732	-0.9477	0.154	-0.4681	-0.422	-0.8866	-3.1391	-0.4991	0.128	-0.2447	0.3743	1.1881	-0.689	-0.2849	-4.0801	-2.714	-0.277	-2.6518	-0.1531	0.6791
EBP	-0.7236	1.1481	0.3159	0.4663	0.8312	0.4109	-0.3045	0.7509	0.7428	-0.2691	0.6842	0.2045	0.6402	-0.3807	-0.6472	-2.8488	-0.1496	-1.9802	-1.6198	0.8122	0.4703	-2.3802	-0.3354	-0.2726	-4.0164	-1.1173	-0.4865	0.2291	-1.3347	-3.3721	0.266	0.7559	-0.7058	-0.5107	-3.2924	-0.1692	0.4347	0.5208	0.9403	0.6514	0.32	-0.2874	-0.5286	-4.6059	0.2106	-0.4913	-1.1432	0.1965	0.5407
TCTN1	-0.7588	-1.1676	-1.591	-0.9546	-0.3792	-1.3762	-0.4837	-0.5397	-0.8584	-0.1425	-1.9855	-1.0208	-1.6278	-0.7669	-0.8971	-1.6663	-0.6034	0.7998	-0.8691	-0.2125	-2.4499	-0.8773	2.7562	-0.3583	-0.1472	-0.6502	-1.3146	-1.1492	0.2674	-0.03982	-1.1813	0.5084	-0.914	-0.6234	2.7713	1.211	-0.3095	-0.3217	-0.4685	-1.1587	0.2123	-0.7804	0.2981	-1.1908	2.8828	-0.7224	0.262	-0.4413	-1.4151
AKR7A2	-0.4911	0.1241	-0.04206	-0.1566	0.1804	0.438	0.04235	-3.2071	0.3782	-0.3067	0.2921	0.8856	0.1287	2.3864	-1.3259	-3.2133	0.7049	-0.9445	-1.0749	0.5031	-0.3164	-1.1971	-0.1398	-0.5984	-2.2254	-0.548	-1.9601	-0.4102	0.4841	-1.7652	-0.01786	0.4804	-0.545	0.3044	-0.6102	-0.215	0.6709	0.6425	-0.1284	-0.1431	-0.9791	-1.0458	0.007281	-3.6634	0.008755	-0.2923	-4.867	-3.8946	0.4755
CASK	-2.6921	-0.0474	-0.4285	0.918	-0.8529	-0.4238	-0.9758	-0.02588	-0.4746	-0.4133	-1.4382	-0.6201	-1.4637	-0.6465	0.7475	-3.5208	0.6416	-0.7434	1.1744	-0.8529	0.2078	-1.2938	1.0773	-0.2197	3.6924	0.02968	-0.0007253	-1.1903	-0.02067	0.2005	-0.3162	-0.1553	-0.3074	-0.8137	1.0759	0.4814	-0.7727	-0.02858	-2.0119	-0.2061	0.8191	0.8099	0.307	4.993	0.3603	0.7365	-0.1583	0.5965	-0.2803
PPP2R5E	0.1324	-0.03965	0.4882	0.5297	0.5954	0.2194	1.3104	0.6783	0.4567	-0.1573	1.3363	1.7029	1.0633	0.1251	0.6534	3.6319	1.1947	-2.7197	0.2509	1.3194	-0.6896	1.9302	-0.7305	0.9308	0.3828	0.5022	0.4375	0.614	1.7271	-0.7301	2.1438	0.6275	-0.3459	0.489	-0.09305	1.4417	-0.2301	0.1332	0.1774	0.05311	-1.0399	-2.9585	-3.2459	-0.2144	-4.0064	-0.7901	-0.7833	-0.5357	0.5478
RRP8	-1.0562	0.8624	0.1318	1.1733	0.8228	-0.5724	-0.7782	-0.4191	-0.2457	-1.577	-0.7562	-0.5882	-0.495	-2.1439	-0.3663	1.9888	0.2975	2.9532	-0.197	-0.5341	-0.6739	1.7881	-0.9477	-0.3069	-1.0222	-1.1613	0.546	-0.7553	-2.1464	1.4441	0.7935	0.01129	-0.895	-1.2815	0.7673	0.6037	0.2032	-0.49	-0.7818	0.1084	0.6794	4.242	3.154	-2.7162	0.6572	-0.1495	2.9939	-0.9834	-1.2161
LAMA3	4.7946	-0.8476	-0.5609	4.4946	0.3788	1.308	3.6789	6.1164	2.9687	4.5526	3.7905	0.5989	8.3006	-0.4126	-0.5547	1.1934	2.0345	-0.3373	1.235	2.7805	-0.6304	-1.3853	-0.7457	1.8654	0.4113	5.1757	-0.9364	1.6327	-0.2528	-0.3516	-0.7423	-0.9484	6.7625	2.3175	-0.5382	1.2631	-0.1851	2.7046	7.5552	2.6243	-0.6884	1.389	-0.1632	6.6006	2.0929	5.8163	3.2573	0.3779	-0.471
PIK3C3	1.1025	-0.6287	-0.6003	0.9125	-0.2202	0.1818	-0.2671	-0.1139	-0.1557	-0.8995	-0.2012	-0.277	-1.5469	-0.5467	-0.6275	0.8596	0.05751	-0.3107	-0.5864	0.3364	-0.2715	0.3853	-0.3199	0.6556	2.6185	0.3203	-0.0338	-0.3235	-0.04919	-1.1183	-0.2182	-0.4329	-0.3496	0.2456	-0.5037	-1.3136	-0.05934	0.05276	-0.2287	-0.2593	-1.28	-1.2147	-0.2847	2.635	0.6789	0.2077	1.5494	1.304	0.1449
BHLHE40	-0.4088	0.186	-0.4937	0.2151	-0.6044	0.4354	0.08375	-0.364	0.4394	0.4403	-0.08965	0.4672	0.3516	-2.8035	-1.4866	-1.2617	0.7119	-2.9398	-1.0628	-0.1719	0.1832	-1.3642	-1.4481	-0.03761	-0.8511	0.1862	-1.2663	0.08743	0.3248	-3.4651	-1.7788	0.1822	-1.047	0.5904	-0.9116	-0.9463	0.4451	0.7177	0.3183	0.3358	-0.00125	-1.5315	-1.7296	1.6502	-0.7678	0.4983	-0.5847	0.7617	0.2719
CCNE2	-0.6434	0.3796	0.6043	-0.9726	0.3716	0.009956	-1.2078	0.2989	0.05169	-1.2733	-0.3524	-1.1626	-0.669	2.0268	0.9306	1.1212	-0.6672	0.6906	0.1011	0.02203	0.2897	-1.493	0.4163	-0.3689	-0.8895	-1.1367	-0.1285	-1.5723	-0.2923	0.7349	0.5032	-0.2137	0.4809	-0.9114	-0.9827	-1.1153	-0.8382	-0.5293	0.3854	0.04913	-0.0043	0.3321	0.6719	-0.4143	-0.1261	0.07979	-0.8918	-0.6402	-0.2446
BDH1	0.659	1.1909	-0.6806	1.1506	1.5013	0.2177	1.1984	0.7969	0.1316	-0.3661	0.1377	0.4675	0.6768	-0.6142	0.9161	-0.0985	1.1174	-0.7359	-1.3064	-1.4238	-0.9577	-0.04195	1.0136	0.343	0.7008	-1.8467	0.3509	0.2224	-0.5603	0.07423	0.4299	-0.3345	-0.7949	-0.09135	-0.0008157	0.8686	-0.4343	-0.1543	-1.4753	0.2056	-2.2832	0.2807	0.8544	0.3472	-0.6355	-1.1797	0.7646	-0.6425	-0.6115
FEZ2	-0.002421	0.496	1.9776	0.9383	0.2218	-0.3079	0.3222	0.01866	-0.1882	0.727	-1.5561	-0.643	0.8069	-0.1131	-0.9919	0.9518	0.8558	-0.7293	0.8726	1.0586	0.8915	1.5904	-1.4707	0.1141	0.09793	2.6496	1.0773	-0.6015	-0.1882	0.2138	1.1278	0.6964	1.0288	0.7812	0.548	2.2053	0.6392	0.4817	0.1943	0.6544	2.6507	-0.4986	0.4394	1.3654	2.0732	-0.656	-0.2573	0.1408	0.3821
IKBKAP	0.08933	-0.8474	-0.5641	-0.2731	-0.626	-2.0923	0.267	-1.4006	-1.1653	-0.4699	-0.5196	-8.9978	-1.8927	-0.37	-0.4269	-3.5156	-0.2892	1.0757	-1.6838	-0.212	-0.4703	-0.4071	-1.4433	0.5749	-0.3196	-0.2131	0.3738	-2.8553	-0.2166	0.3302	-0.1758	-1.3951	-0.6869	0.3834	-0.05445	1.3816	-2.2309	-0.7288	-3.5111	-0.3021	-0.1681	0.2284	-1.6197	-2.8331	-3.195	0.7264	-2.3233	-1.4796	-0.3415
SH3BP5	-1.5144	-0.1321	-0.9788	-1.7873	-0.4264	0.3705	-0.8382	0.695	0.7888	-0.2691	-0.6634	0.0289	0.587	-0.9922	-1.0889	2.5951	-0.8554	-1.3995	-1.7589	-0.6312	-0.966	-0.2514	1.3863	0.453	-0.4591	-1.0218	-1.1147	0.4885	-2.116	-1.2198	-0.7423	1.0393	-0.4993	-0.33	-1.5179	-0.0553	0.9945	0.8442	1.499	0.3472	-1.0659	-0.8523	0.3914	0.5969	1.9428	0.8648	2.3833	0.708	0.4855
PPP2R5A	-0.1319	1.3454	-0.08357	0.4579	-0.01375	0.4101	0.7715	-0.268	0.1571	0.2488	0.4112	0.5195	1.0694	-0.2973	0.2213	1.8879	-0.3525	-1.0175	-0.2852	-0.06528	1.1927	0.3553	0.109	0.7691	-0.9413	-1.0782	0.1016	-0.06987	-1.1829	-0.5758	0.2423	0.3578	-0.6911	0.002912	-0.127	-1.0056	-0.07799	-0.5393	-0.8951	0.7711	0.6293	0.5493	-0.3726	-0.4759	-0.4452	-0.6062	-0.2555	-0.4584	0.8053
SGCB	-0.7356	0.1244	-0.01655	-0.1204	0.7812	0.7188	0.1662	0.6902	0.5217	-0.3126	-0.124	-0.7634	-0.2001	0.9542	-0.4543	-1.7282	0.1423	-0.2963	0.6068	0.3024	-0.8503	0.318	-0.0756	0.9119	0.8858	0.4851	1.4881	1.0168	0.2474	-0.9841	1.4448	0.4157	0.3488	-0.3423	-0.05991	1.1793	0.2853	1.0161	1.0382	-0.4059	-0.1275	0.1838	0.1497	1.7369	0.298	0.4631	0.3444	0.5606	-0.1347
EML3	0.4814	-0.1025	-0.3461	-0.639	-0.371	-0.252	-0.5623	-0.2645	-0.1657	-0.432	-0.2066	0.5505	-1.4849	-2.4413	0.3005	0.2693	-0.1239	-0.08182	0.1345	-0.8617	4.0834	-0.07155	-0.321	0.6499	4.6722	-1.0315	-0.5488	-1.373	0.0002213	0.9241	-1.6609	-0.2958	-0.486	-0.6522	1.4787	-2.0438	-0.587	-0.3831	-2.3804	0.1969	-1.8738	-0.4452	0.6592	2.6747	-0.9858	-0.8101	2.5307	3.4158	-1.1852
ENOPH1	-0.1639	-0.0393	-0.6756	-0.3463	-0.1512	-0.4474	-1.0513	0.1174	-0.7147	-0.0334	-0.358	-0.3785	-0.2096	0.961	0.7232	-0.1125	0.4464	-3.2506	-0.5422	-0.4603	-5.252	1.2037	0.6172	-0.2362	-2.9918	-0.4081	0.9591	-0.7215	-0.9186	1.9679	0.1813	0.1676	0.1817	-0.5665	-4.352	0.9431	-0.2172	-0.7866	-1.2836	-0.4926	0.09015	0.597	0.6079	-0.6032	0.2152	0.6128	-2.2619	-4.2704	0.08038
BIRC5	-1.3272	0.521	0.08845	1.5745	0.6375	0.248	0.1775	1.3064	0.3694	0.196	0.7155	-0.8108	1.5477	-4.9642	0.2928	-2.9521	0.471	-1.4906	-6.199	0.569	-0.631	-0.6581	0.0693	-0.5478	-2.5962	-0.3678	-0.7158	0.4387	-0.3298	-2.2214	1.6657	0.8886	0.5286	-0.5037	-1.8482	1.6619	0.9489	0.5683	0.6435	0.5199	0.1636	0.172	0.1234	-6.625	0.184	-1.1346	-2.2647	0.104	0.5611
CNOT4	0.4876	0.02955	-0.7641	0.9356	-0.1795	-0.2318	-0.3273	-0.02956	0.2303	0.6435	-0.3424	1.121	-0.2125	-0.07239	0.7708	2.2003	-0.1561	0.4343	-0.1337	0.01749	4.9679	5.3232	0.322	0.3953	1.6389	0.1032	1.3611	2.7352	-0.1863	0.8467	-0.1035	0.2257	-0.0464	2.9892	2.2359	1.5659	-0.1639	-0.209	-0.891	0.4453	0.7329	0.5146	0.8395	0.8492	0.292	-0.1616	2.2943	-0.436	2.9122
EPRS	4.9105	-0.224	0.6767	-1.6296	0.3081	0.5653	-0.6183	0.1476	-0.2777	-0.2672	-0.9858	-0.6017	-0.05546	-1.2966	-0.156	-3.4218	-0.6184	0.7342	-2.34	-0.476	1.0027	-0.5494	1.5741	0.2197	-0.7972	-0.0683	-0.1401	-1.5393	0.1039	-1.0633	-0.7952	-0.02661	-0.2551	-0.2279	1.0201	1.8743	-0.6457	0.07833	-0.8178	-0.483	-0.3609	0.3835	0.537	-2.8184	0.7573	1.3759	-1.6347	-0.1646	-0.1549
SNAP25	4.8749	-0.3379	4.7569	-0.2537	-0.3997	5.1955	4.876	3.5702	3.8219	9.4127	-0.6026	3.3492	7.7424	-0.05739	-0.3058	2.2906	2.6474	-0.2525	-1.0196	3.2471	6.7029	-0.3257	4.2957	0.6098	0.3156	4.671	3.9472	0.6805	3.0878	0.8665	0.8721	3.0765	1.3536	-0.1335	2.6965	3.231	3.9791	2.0582	-0.1865	4.0024	-0.6158	1.7221	2.9379	-0.6091	-0.02062	3.3405	0.5838	-0.2216	0.9631
JMJD6	-2.0692	0.05225	0.4115	0.9391	0.7125	0.1123	0.4251	0.3396	-0.4859	-2.8059	0.098	0.4793	-1.7603	0.9997	-0.3663	-2.0652	-0.8443	-2.2517	1.7199	0.3067	1.1557	1.2133	-0.9693	-0.3174	-0.3517	-0.7881	0.4926	-1.7974	-1.1454	-0.07245	0.2175	-0.509	0.2678	0.28	-1.2868	-2.7889	-0.6599	-0.06007	-1.1081	-1.3503	0.7326	0.6746	0.08579	-0.5641	0.296	0.8317	0.006411	-0.4144	0.1153
PAX8	0.2734	-0.3074	-0.2373	0.5671	0.1796	0.2367	0.1546	0.1306	-0.2743	0.4328	-0.2354	-0.6871	0.4957	-0.6907	1.1418	-3.6275	0.8533	-1.712	2.0956	0.1375	-1.208	0.9567	0.3775	0.4078	2.5939	-0.9701	0.2307	-0.3028	-0.4396	2.1187	1.0401	0.1103	-0.6197	-0.7773	-0.2071	1.0363	0.07335	-0.4169	-0.1892	0.3433	0.3245	0.7395	0.1075	3.5329	0.7827	-0.4889	1.9248	-0.4531	-0.8502
CBLB	-0.5179	-0.3593	-0.8291	0.1053	-0.6343	2.6405	-0.05975	0.9361	1.5642	-0.8629	-1.1605	0.4451	-0.9481	-2.0644	0.6049	1.9136	0.1584	-0.144	3.1749	0.1953	-3.0999	1.7042	5.3893	-0.03454	1.1938	-1.6389	-0.4518	-0.8786	-0.303	0.03794	-0.2127	-0.942	-0.7893	-0.2211	0.3491	-1.1668	-0.1618	0.1495	-0.9903	-1.0311	0.1348	0.2088	1.0179	0.3304	0.5668	0.2807	1.9653	-0.4044	-0.1509
SLC35F2	0.5164	0.3759	-0.4448	0.3832	0.2473	-2.7767	0.173	-2.1637	-1.45	-0.4851	0.5933	0.8921	-0.1716	-0.2243	-0.2619	0.1719	-0.3103	-1.8104	0.1585	-0.3103	-1.923	1.4014	-5.1198	-1.5185	-0.9724	-0.4622	0.9599	0.05919	-2.0997	-0.1582	0.1266	-1.1169	0.4061	-0.3654	1.3984	0.7762	0.02244	-0.1464	-0.1499	0.0269	0.3059	0.662	-3.1468	2.5955	0.7412	0.07055	0.2027	-0.1841	-0.866
ANO10	0.4478	-0.2521	0.07336	0.09575	0.0462	-0.7482	-0.4936	0.1614	-0.3504	1.6162	-0.8037	-0.6987	-0.7144	0.952	-1.4038	1.5815	-0.9952	-1.2672	1.4766	0.812	-1.2413	2.1036	-0.3727	-0.2132	-1.0742	-0.9933	2.0015	1.0021	-1.4887	0.6747	3.402	0.5518	-0.5937	-0.3743	-0.041	0.07485	1.3125	0.244	-0.9484	-0.0956	3.1123	1.1472	1.5242	0.4798	1.0906	0.2945	-0.4627	1.4062	0.003952
PDS5A	-0.7001	0.4583	0.3485	0.6701	0.5537	0.8368	0.5989	0.8644	0.4047	-1.1159	0.4554	0.0997	0.5435	-0.7927	-0.74	-0.2436	0.6806	-0.6148	-0.7303	0.4564	0.4236	-0.382	0.5121	-0.1629	-0.3917	0.857	-0.8952	-0.5066	0.4402	-1.2145	-1.2189	0.6195	-0.3012	1.0949	1.7301	0.5183	0.03964	0.5466	-0.05114	0.2909	-1.4477	-0.6537	-0.6104	-1.2124	0.4615	-0.3726	-1.6071	-0.8101	0.04458
DFFB	0.1693	0.4178	0.5223	0.05615	0.3345	-0.4013	-0.0976	-0.7344	-0.1922	0.2446	-0.5743	1.0215	-0.7661	-1.2501	1.147	4.5629	1.869	1.1209	-1.0841	1.6352	-1.2162	-0.8217	-0.2285	-0.443	-0.3743	-0.4863	0.3639	0.3593	0.8465	1.5438	0.7118	0.2376	0.4708	0.6972	0.8473	1.0479	-0.1876	-0.432	0.281	-0.1609	-0.4304	1.4932	0.6195	-0.3188	0.3546	0.1899	-1.0977	-0.8356	1.0249
STUB1	0.01563	0.2725	0.3501	0.338	0.784	-0.1036	0.636	0.1566	-0.4631	-0.6235	0.3613	-1.1885	1.0015	1.238	0.2725	-3.3509	-3.2784	-0.7921	2.8234	-3.6065	-1.5301	0.8727	0.7053	-0.09795	0.8213	0.2926	-0.1488	-0.5853	-0.2594	0.8467	-0.1029	-0.1145	-0.1699	-0.5896	-1.2656	-4.4435	-0.0383	-0.1365	-0.4823	0.6456	-0.23	0.8457	-2.4232	0.8808	0.3234	-1.0207	0.5404	-0.1112	-0.1955
PGAM1	-2.3478	-0.7533	-0.8771	0	-0.4829	-0.006168	0.2243	0.4415	-0.7031	0.2243	-0.3372	-0.4506	0.2864	-0.1861	0.6021	-3.3201	0.04578	-1.3422	0.3952	0.2618	-4.8569	-0.1489	0.4005	-0.6426	-0.3491	1.4322	0.5141	0.03759	1.2178	-0.6259	-0.6658	0.2235	0.3504	0.1859	-1.3241	1.881	0.7034	0.4105	0.6551	0.3937	-5	0.2827	-0.2256	-1.4348	0.04514	0.3179	0.5921	0.6778	0.0837
TGFB3	0.631	-0.5589	0.5089	0.6141	0.7265	0.7387	1.7177	0.615	0.4262	0.7831	1.4436	1.1498	0.6714	0.9833	0.6351	3.5023	1.1003	0.8136	0.3469	1.0598	4.9373	1.478	0.2126	0.1953	0.407	0.9269	-0.1374	0.4141	-0.5007	1.0223	1.3476	0.8758	-0.258	0.04548	0.4382	0.9807	-0.1764	0.2544	1.3902	0.3983	-1.2231	0.6209	-0.1915	0.1411	0.7164	-0.5965	-0.9576	0.232	1.6672
BAD	-0.05554	0.7511	0.9762	1.9993	0.5882	-0.3883	0.1657	0.1372	0.4863	0.7482	-0.0044	-0.9183	0.8298	-0.01057	0.2581	0.9088	0.03873	-0.4224	0.4831	1.2448	-0.9771	-0.0653	0.548	0.9224	-0.2039	-0.3778	0.4595	0.8053	-0.6695	-0.8653	0.8129	1.883	0.5958	0.03201	-1.2009	0.2479	0.03042	0.5143	0.7333	0.3378	1.6635	0.5165	0.8533	0.1178	0.3747	-0.1471	-0.7485	0.5542	0.6756
XBP1	3.8047	0.1081	0.09703	-0.7931	-0.2924	0.5859	0.7596	0.07291	0.04555	-0.5045	0.406	1.0276	-0.3622	-0.618	-0.4057	-1.3638	0.6936	0.3586	-0.09046	-0.3924	2.7046	0.7508	-0.332	-0.3361	-1.682	0.8216	0.2153	-0.4666	0.2289	0.02456	0.6755	-0.3792	-0.1636	-0.3854	0.3822	-1.0428	-0.1011	-0.002398	0.3016	0.1222	-0.7526	0.6845	-0.4979	-1.4738	0.5184	0.1202	-1.5032	0.2046	0.3895
NMT1	0.3685	-1.0816	-0.405	0.4255	-1.1774	-0.4848	0.1027	-0.419	-0.4879	0.0779	-0.1724	-0.0097	-0.5057	-0.8651	-1.3634	1.0123	1.0776	0.8034	-0.3493	0.5328	-0.7193	-0.1557	-0.3389	1.3368	-0.03252	-0.5514	0.139	-0.299	0.557	-0.4549	0.08847	-0.1908	0.09615	-0.9451	1.4173	0.393	0.03898	-0.9126	-0.1795	-0.272	0.4313	0.2317	1.0659	0.2864	-0.7842	-1.0624	0.7531	-0.7858	0.3428
PSMD10	-0.6912	1.2964	0.9063	0.8582	0.6284	0.8629	0.3166	0.8746	0.524	0.1016	0.842	0.5368	1.2343	0.2783	0.3331	-0.7622	-0.7803	-0.4635	-0.8247	-0.2627	0.8628	0.2628	-0.06555	-0.3792	-1.3861	0.942	-0.4496	0.1435	0.2293	-0.9452	-0.1211	0.1852	0.6951	0.7328	-2.0369	0.3837	0.3568	1.1166	0.4182	0.337	-0.7829	-0.3259	-0.8609	-0.51	0.8875	0.2128	-0.4891	0.9778	0.3503
ARFIP2	-1.2101	1.6251	1.5136	1.6474	0.902	1.0019	1.2055	1.012	0.6848	0.1815	-1.6753	-0.0177	1.0078	1.2542	0.3673	-3.2413	0.2549	-2.1894	-1.8809	0.5559	-4.8651	-0.9543	-4.885	0.05026	-2.8785	0.2637	-0.2661	-0.07411	-0.198	-0.9225	1.2048	0.9853	-0.1226	-0.1187	-3.3734	-2.031	-0.2019	0.3098	-0.05638	0.1531	2.1895	0.2842	-0.09646	-1.6889	0.3698	-0.09703	-1.4899	0.2112	-0.5059
RAB11FIP2	0.92	-0.6077	-0.8207	0.2009	-0.7019	3.6295	4.951	-0.2806	-0.09792	-0.2052	5.1558	0.5926	0.3767	-0.1054	0.305	1.9316	-0.5074	0.9438	0.8342	-1.4491	4.898	1.0034	6.2641	0.9858	0.7658	0.4036	0.6684	-0.4071	0.7792	1.7511	-0.3175	-0.3042	0.128	-0.5531	3.6187	0.6187	3.5417	-0.9466	0.8901	0.009889	5.3372	0.03083	0.2101	0.3926	1.9456	-0.3585	2.1794	-2.2015	-0.7036
FPGS	0.6334	-0.138	0.04833	-0.9286	-0.7587	-1.3985	0.205	-0.3641	0.3122	-1.2293	0.7361	0.2484	-1.21	-0.1622	-0.0791	-1.3786	-0.4572	-0.246	-0.06431	-1.2068	-0.4595	0.3148	0.8358	-0.9816	0.2243	0.3869	-0.2879	-1.456	-0.9143	0.9128	-1.4716	-0.7943	-0.4423	-1.593	0.4869	-1.6031	0.1489	-0.5081	-1.1652	-1.6542	-1.3741	-0.3264	-0.1472	-0.324	-0.05908	-1.5815	0.3316	-0.7576	-0.07371
STAMBP	-0.4404	-0.5885	0.4403	0.3611	0.4365	-0.06562	-1.1218	-0.398	-0.5335	1.101	-0.512	-0.5601	0.09644	0.02563	0.4803	-0.5082	-0.3472	-0.04759	1.1864	1.4147	-0.05955	-1.8096	-0.4204	0.2336	0.5708	0.3099	0.03619	0.789	0.7584	-1.4127	-0.1544	0.7756	0.3585	1.1163	0.5274	-4.6106	0.385	0.7102	0.2736	1.2506	1.2789	-0.3497	0.1035	2.4336	-0.1394	0.6999	0.972	0.4284	-0.01047
PRKX	0.4877	-0.7928	0.1444	0.1559	0.2491	0.2697	1.028	-0.4026	-0.1219	1.0781	0.7536	-1.3544	0.3739	0.4908	0.2296	3.6827	1.2086	0.864	-0.6958	0.4701	-1.1222	1.5065	0.133	-0.4051	1.2204	0.01075	0.0687	1.3269	-0.1576	1.4113	1.1554	0.228	-0.2813	-0.6091	-0.7098	0.8698	-0.00434	0.2437	1.9373	-1.2667	-1.4208	0.3344	-0.3749	0.6882	-0.03799	-1.1147	-0.469	-0.04968	0.8017
RNH1	-1.0465	-0.7861	-0.4277	-5.023	-0.0555	-3.4226	-0.5151	-0.07558	-1.3217	-0.2	-0.5142	-0.9662	-0.5784	-0.8186	-0.02185	-0.01232	0.1301	0.3331	0.2026	-3.3022	-0.7438	-0.2671	0.9852	0.1143	0.7587	-1.062	0.2445	-1.1427	0.08309	0.8356	-0.03245	-0.366	-0.1996	-0.6042	1.8839	1.2431	-0.1716	-1.4783	-1.1669	-0.6059	-1.4825	0.3023	-0.1523	-0.2475	-0.1649	-1.0066	0.5719	-0.1136	0.2515
ATG3	-0.6077	-0.5272	-1.2912	-0.4235	-0.3047	-0.5328	-1.7118	-0.5581	-2.3943	-4.3365	-0.8238	-5.315	-1.7753	-1.4372	-0.3846	-0.6441	-0.3901	0.08943	-0.5302	-0.6045	-3.7438	-0.2383	0.05375	0.213	-0.3475	-0.6674	0.498	-0.9733	-0.9398	0.143	-2.2909	0.2593	-3.2461	0.05218	-1.2195	-1.4194	0.3838	-0.9064	-0.7025	-0.2131	-4.8297	0.5295	0.1834	-1.2129	-2.5158	-0.703	2.2746	-0.6953	-0.2251
FAH	-1.2421	-0.8623	-0.5139	0.5342	-0.2349	0.1549	-0.2291	-0.9042	0.2529	-0.7531	-0.9191	2.6127	1.4435	-1.7088	-1.2541	1.602	-2.2178	-3.0591	0.09307	-0.6856	0.6601	-1.1327	-0.6018	1.2822	1.8792	0.01271	-1.359	0.3178	0.4752	-0.3916	-2.3397	-0.5799	1.6225	0.3059	0.7579	1.7433	0.2946	0.5161	-0.3909	-0.6944	-0.6493	-0.938	-0.3642	2.7523	1.2601	-1.3047	2.3434	0.3587	-0.2387
NCK1	-0.6866	0.6614	-0.2659	-0.9247	-0.1016	0.07841	-2.3746	-0.0002789	-0.1762	-0.8491	-0.6296	-1.8701	0.3407	-0.6731	0.7844	-0.8299	-0.03125	-3.6365	-1.851	-1.6141	-2.3328	-3.9821	-0.2853	-0.4576	-3.872	-0.2665	-3.5382	-0.7245	-0.765	-0.9788	-0.2719	0.5404	-1.82	0.4293	-6.5505	-0.02009	0.08052	0.3355	-0.4487	0.2616	1.2361	0.3495	0.3191	-3.4074	-0.06617	-0.5749	0.02297	-0.4121	-0.04358
PLP2	-0.156	-0.7922	-1.3859	-0.3495	-0.6985	-1.261	-0.3295	-1.7361	-0.4251	-0.9014	-0.8636	-1.4987	-0.4597	-1.1767	-0.9995	2.7403	-0.8674	1.8703	1.7547	0.461	-1.2894	2.2837	0.3701	-1.1818	2.1517	-0.575	1.3962	-0.04106	-0.1095	-0.01523	0.9795	-0.009842	-0.1638	-1.7524	3.2731	0.82	0.03357	-0.2831	-0.2707	-0.2729	-0.5655	-0.03075	-0.4153	1.5175	0.2074	-0.1388	1.1076	-0.675	-2.2181
CFLAR	-0.3758	0.6012	-0.1234	-0.3785	0.8031	-1.2663	-1.9637	-0.7398	-0.4007	0.1142	-0.4022	-0.1534	-0.0006878	-0.6423	-0.8506	0.9839	-1.1999	0.4924	0.2432	-0.7221	0.15	1.1195	-0.1983	-0.3258	-2.62	0.7864	1.9643	-0.4208	-3.4914	-1.1853	-0.2534	-0.02721	-4.5994	-1.7207	-2.108	-5.495	-1.457	-0.1026	0.2192	0.3966	0.6525	0.8476	1.171	-2.348	-4.1773	0.6401	-5.1602	1.3625	-0.5515
SOX4	-2.0319	1.0646	-0.8631	-1.0991	0.1147	0.5481	1.776	-0.1656	0.1573	0.1965	-0.599	0.1639	-0.9418	-0.4653	-0.3125	1.0975	3.2384	-1.204	1.03	1.6958	-1.3214	-2.1713	0.4131	-1.0262	1.8021	-0.7125	-0.6667	-0.5751	1.3295	-1.2366	-1.1073	0.7005	0.3962	1.3802	-0.1279	-0.9945	1.2222	0.6293	-0.06753	0.3097	-0.5457	-0.112	0.5199	5.4032	3.2587	0.3107	1.1376	-0.1098	0.199
HEATR1	-0.5301	-0.6775	-4.5013	-1.0868	-0.3765	-0.609	-0.4781	-0.5257	-1.019	-1.0483	-1.2768	-0.3452	-0.8764	-3.1609	-2.5575	-3.741	-0.5576	-0.3945	-1.678	-3.6543	-0.2221	0.3564	0.2423	-0.3108	-0.2252	-4.5466	0.4462	-1.8091	-0.02641	0.5659	-0.9956	-0.7035	-1.4052	-3.9905	-0.8203	1.1387	-0.2898	-0.212	-3.1168	-0.9486	-0.957	0.5372	0.6554	-1.0192	0.6325	0.2067	0.6949	0.1894	-0.1486
TESK1	0.1663	-0.6571	1.3066	-0.1375	0.1132	-0.02953	1.1686	-0.2522	0.3075	0.6978	0.5336	-0.5955	-0.2715	1.4213	1.7638	3.819	0.9276	1.4858	1.8722	0.6857	-0.7314	1.4549	0.3868	0.6592	1.08	0.4858	0.9946	1.4641	0.0797	2.2838	1.2845	0.4876	0.8905	0.3071	0.753	0.8105	0.5017	0.03228	2.1598	-0.02938	-0.8568	0.4865	-0.09895	0.7292	-0.8008	-0.4821	-0.1612	-0.2884	0.614
HN1L	-1.533	0.4631	-0.3514	-0.06505	0.0951	0.5017	-1.4114	-0.08984	-0.1564	-0.3356	-0.343	-1.378	-0.7559	0.2034	-0.3764	-3.6807	0.3321	-0.2518	0.7167	0.04147	-0.3571	-1.3122	-0.6553	-0.3802	-3.542	-1.1695	-0.7019	-0.8457	-0.7074	-1.3244	0.3605	0.3638	-1.26	0.4522	-0.8376	-0.2946	-0.05241	-0.137	-0.7304	-0.1227	-1.007	-0.1881	0.2357	-3.6618	0.8905	0.5493	-2.4263	-0.6428	0.944
WDR7	0.005508	-1.2025	-0.5814	0.0032	-0.7905	-0.1978	0.0051	3.9367	-0.1954	-0.2966	-0.5037	0.2791	-0.5739	-2.162	-0.161	3.0269	-0.4845	0.2148	-1.1841	-0.0009524	-1.1165	-0.296	1.2433	0.1654	0.3114	3.2202	-0.2258	3.1526	-0.4815	-0.1466	-0.9051	0.3533	-1.4805	-0.09966	2.4399	1.4937	-0.1811	0.1327	3.2795	-0.3455	-0.3075	0.1962	-0.5513	-0.4971	0.02145	-0.6015	5.6732	-1.8071	0.4081
AKAP8	-0.4684	0.6153	-0.2899	1.3182	-0.06385	2.1069	0.2017	-0.2318	0.4608	0.1876	-0.7968	1.8888	-0.1977	-1.2608	-0.7503	1.0722	-0.259	-0.76	0.6612	-0.02166	1.7085	-0.6802	0.3615	0.1727	-0.1802	0.6525	0.05438	0.5707	-0.05299	-0.4646	0.7409	-0.9973	4.4888	0.2958	0.1902	-0.07183	-0.594	0.03984	-0.927	-0.05836	-0.08945	0.9513	-1.052	2.4403	-0.1214	-0.1823	-1.0245	1.7755	-0.7362
RRAGA	-0.6459	0.6132	0.2558	1.244	0.2979	0.8999	-0.4179	0.2308	0.1502	-0.0218	0.6296	0.5333	0.3417	-1.473	-1.0625	-2.9107	0.02334	-1.4874	0.5191	0.3207	0.0099	-2.0461	-0.7552	-1.1689	0.3075	0.5097	-0.01047	1.0175	0.982	-1.8775	-0.7595	0.1165	-0.9607	-0.4878	-2.1437	-4.663	0.2595	-0.06201	0.2996	0.4273	0.5328	-0.3934	-0.4046	-1.2223	-0.4056	2.3775	-1.5363	-0.1939	0.168
ELOVL6	-0.7644	0.0749	-0.6634	-0.7265	-0.428	-1.2693	-0.205	-1.4075	-1.1905	0.1784	-0.8263	1.3994	-0.5874	0.0245	0.8059	2.9427	-4.0828	-0.09093	-0.04409	-1.0199	-2.39	0.9112	0.0264	-1.7896	0.5462	1.0158	1.2818	-0.3315	-0.3878	0.2781	-2.8139	-0.4067	-0.9626	-0.696	-1.9155	-1.6782	-0.4299	0.1084	-0.04206	-0.1342	0.7334	-0.04702	-0.8316	-0.365	0.1893	-1.5692	5.5236	0.02908	-0.6062
SLC1A4	3.6167	-0.3188	0.515	3.563	-0.1802	1.3274	4.5892	-0.7974	0.9266	-0.1158	0.6783	0.9831	2.3205	1.2234	0.4981	1.9813	0.7809	0.4515	0.793	0.1517	3.5511	-0.6787	0.9525	0.5001	2.2899	0.3364	1.7204	0.06508	-0.5175	0.1124	2.0322	0.5274	0.3335	0.834	2.9634	0.4986	0.756	0.7249	0.6577	0.5171	0.3887	-0.2375	-0.4724	-0.1616	1.6909	-0.002463	1.5552	-0.64	0.5562
ACBD3	0.1701	1.3334	0.5034	-0.1965	1.0927	0.05136	0.2365	0.1102	0.03267	-0.9132	0.6108	1.9308	0.5063	0.8813	0.1366	-2.2729	-0.09898	0.6186	-0.1295	-0.0121	0.9641	-0.6983	-1.0119	-0.2431	-0.6267	1.1995	0.6956	0.5311	-0.107	-0.9611	-0.5522	0.2468	0.7675	0.2464	0.5097	-0.2426	-0.254	0.4285	0.7466	0.346	0.4337	0.691	-0.5589	0.2075	-0.2965	-0.8016	-0.4594	0.5715	-1.0761
GRWD1	0.2546	0.3033	0.01256	0.644	-0.04085	1.4583	0.7936	1.3442	1.1888	1.2925	-0.4597	0.6867	0.264	0.6913	0.8101	1.1539	1.0347	-0.1112	1.1221	0.7665	-0.1009	1.1339	1.2057	0.6313	-0.1942	0.3626	-0.01374	0.3938	-0.1471	0.934	0.3331	-0.3464	1.3386	0.06482	-0.9072	-1.3767	0.2951	0.1567	-0.4865	0.08076	1.9238	-0.02687	1.558	-0.238	1.1876	1.1882	1.4249	0.8107	0.6103
PMAIP1	1.4539	-1.0957	-0.7104	-0.7434	-1.247	-1.382	-0.6486	-0.7283	-1.2656	-0.3712	0.2585	0.0368	-0.8903	0.9474	0.7725	0.2818	0.1755	1.5826	1.5447	-1.2909	0.1054	0.7944	2.1202	-0.1482	2.3371	0.7558	0.2064	-0.4627	1.5541	1.4796	-0.6412	-0.8667	-0.802	-0.1423	0.8831	0.2463	-0.6486	-0.4425	-1.2445	-1.4141	0.01285	0.4657	-0.5258	4.3222	0.462	-1.016	0.7367	0.3899	-0.9937
STAT1	-0.2083	0.05335	0.115	-1.6553	-0.03745	0.01206	0.4464	-1.258	-0.6193	0.3545	-1.872	0.8969	-1.1273	-0.4389	-1.525	-0.9159	-1.4337	1.4936	0.4707	-0.929	-0.2395	-1.5029	-1.3684	-0.9194	-0.2345	1.2067	-0.3369	0.008613	1.6861	-0.0611	-1.2761	-0.7206	-0.1002	-0.09131	0.5505	-0.7829	0.2585	-0.03429	-0.4265	-0.3231	-0.521	0.574	-0.4441	0.0898	-0.7383	0.2857	-1.0902	0.8849	0.2386
FOXJ3	-0.6968	0.1779	-1.1315	-2.2756	-0.7559	-0.6894	-0.3471	1.5473	-0.5387	2.1053	-0.8212	0.222	-0.5691	-1.5007	-0.3881	-4.0515	0.3639	0.6039	-1.3379	-0.9817	4.1071	-0.8004	2.2994	0.1498	0.4131	-0.4818	-0.408	-1.0181	0.3947	-0.3166	-0.6128	-0.8077	-0.9376	-0.3954	0.3983	0.04597	-0.7784	-0.8122	-1.2714	-1.1824	1.5749	0.04067	2.0423	1.7734	0.6244	0.1255	0.7934	0.5174	-0.4883
TWF2	0.8431	-0.6207	-0.1291	0.6884	-0.6695	-0.9142	-0.4553	-1.8213	-0.5421	-0.1259	0.0413	-0.495	-0.7819	0.5858	-0.5047	-3.7725	-0.8517	1.3874	0.819	0.3515	-1.3715	-0.6503	-4.4335	0.9705	4.0645	-0.3711	0.4297	-0.3702	-3.0661	0.7741	-0.5002	-0.7021	-0.3044	0.08511	0.601	-3.5509	-0.5037	-0.3292	-1.2999	-0.8115	-4.524	-0.06221	0.1076	5.4799	-0.2645	0.1665	1.7653	-2.2946	-0.8946
HDAC6	-1.854	0.8168	0.1209	1.0211	-0.7307	1.1608	-0.7169	0.4894	0.4372	-0.4866	-0.1797	4.919	-0.3315	-4.4235	-0.6733	0.03201	-0.5633	-0.01901	-1.4743	1.2361	0.5303	-2.8802	0.1787	-0.3667	-1.1052	0.1598	-1.467	-1.1011	2.7675	-2.1911	-0.7304	0.6687	0.2098	-0.00416	1.5038	-0.6169	0.2972	0.6559	-0.5206	0.08249	3.4927	-0.4171	0.08978	-1.6873	-0.465	-0.07564	1.771	0.4913	0.03468
MTERFD1	-0.07422	-0.7431	-0.3643	-0.5368	0.09245	-2.3038	-0.6827	-2.6918	-0.4517	-0.7398	0.09015	-5.2175	0.5698	0.1404	0.5821	2.2927	0.5726	0.4397	-0.291	-0.5458	-1.3069	1.2438	0.3382	-0.6743	0.4848	0.2266	0.1864	0.05637	-1.4845	2.1527	0.2485	0.3509	-0.7691	-3.2489	-1.5678	1.9989	-0.2149	-0.1649	1.1233	-0.08048	-4.6725	0.4122	-2.5426	0.3675	-0.7388	-0.7354	-3.8117	-2.1677	0.1829
CCND1	0.4589	-0.04215	-0.1739	9.7916	2.2027	-0.2711	2.3126	0.311	-0.6978	-0.608	-1.2842	0.2928	-0.2906	0.5971	-0.335	1.762	1.1488	0.2429	1.2637	-0.3153	-0.3076	2.5479	-0.169	-0.1442	1.1004	0.5431	0.8739	-0.08601	-0.8893	1.3416	0.4759	-0.6308	0.2328	1.2183	0.2044	2.4094	-0.3972	0.8908	-1.4661	-1.088	-1.6475	0.4959	0.05418	0.9051	0.7779	-0.6077	3.3302	0.72	-1.296
CHIC2	0.8564	0.1255	0.01298	0.4459	0.6202	-0.1062	-3.3173	-1.5139	0.04172	0.8857	0.4194	0.2277	0.2509	2.5753	1.2587	-3.2273	-1.7541	2.6227	3.2154	-1.2511	-2.1162	3.4962	0.5029	-0.4364	1.174	1.1159	1.5884	0.1322	-0.9408	1.9809	1.7356	0.02719	0.333	-0.02648	-2.7464	-1.5349	-0.3802	-1.7924	-0.3753	-0.5529	0.274	0.7196	0.245	5.7238	0.3552	0.1372	-1.8191	0.865	-1.0505
PXN	-0.9145	-0.4228	-0.05022	0.4276	0.0047	0.1995	1.1008	0.1573	-0.5146	-0.291	-0.4809	-0.067	-0.1594	1.0608	0.6675	-2.0174	-1.4089	1.7023	2.3068	0.4383	-0.4693	3.1345	0.6004	0.1645	5.1236	-0.232	0.5964	0.4704	0.376	1.6933	0.6625	-0.46	0.7102	0.1743	1.5372	1.8555	-0.8294	-0.551	-1.0863	-0.7116	-0.9157	0.455	-0.3299	4.9065	0.77	0.461	3.5405	0.2744	-0.6004
USP7	4.0403	0.4113	-0.5086	0.0604	0.4505	2.0956	-1.0599	0.1184	-0.02974	-1.2819	-0.8685	0.1469	-0.3465	2.6275	-0.6912	-1.5932	-0.2133	-0.8161	-1.8474	2.8425	-0.0548	-1.0331	-0.7353	0.2504	-1.325	-0.353	-0.5422	-1.1409	-0.5284	-2.433	0.4369	-0.7126	0.002988	-0.04738	2.1844	4.1483	4.0257	0.1065	-0.8659	-0.6309	0.2387	-0.2462	0.3464	-1.3934	3.1568	-0.621	1.0118	-0.1371	-1.3756
NOSIP	-1.2736	-1.4037	-0.007751	1.1502	0.1821	-0.8442	-1.6992	-0.657	-2.2838	-0.1594	0.2142	-1.1631	-3.6527	-1.4525	0.09715	-3.6398	-0.4643	1.0883	0.1953	0.4594	-1.8138	-4.0834	-0.568	-0.2065	1.2063	-0.4553	-6.3796	-3.4649	-0.4129	0.3309	-2.2953	-0.2327	-0.4827	-3.8403	-5.7444	-3.0861	-0.1716	-1.908	-1.5362	-0.6398	0.0902	0.6399	0.7809	1.2838	-0.07327	-0.9272	-0.7037	-1.9141	-0.7753
PHKB	-1.3736	-0.1872	-0.2867	0.3784	-0.2215	-0.4372	-1.2344	-0.9156	0.3756	-0.8866	-2.0494	-1.087	0.1342	-0.5668	-0.8875	-0.5451	-1.1473	-0.5443	-1.7771	-0.6844	-0.9451	-0.8548	0.1321	1.3539	-0.7898	-0.8216	-0.6447	-0.7051	-0.3736	-1.192	2.0662	-0.4994	-0.4048	2.4953	2.017	0.461	0.3724	-0.3168	-1.4503	0.009164	-0.373	-0.07834	-0.003506	-4.7794	-0.2374	0.946	0.9512	-0.416	-0.4032
DLD	-3.4517	-0.2755	-1.1278	-2.6529	-0.3206	-1.3813	-0.8876	-0.6501	-0.5558	0.4418	-0.5627	-1.4074	-0.6354	-0.5192	0.6975	-2.4449	-0.2815	-0.5967	-0.4805	-1.008	-10	-1.2008	-4.8324	-0.5344	-1.4144	-0.5514	-0.4984	-4.5054	-1.1201	0.4371	-0.6778	-0.4745	-9.4643	-0.1473	-0.07072	2.9549	-0.3849	-0.2164	-0.2473	0.7929	0.816	0.1855	0.2104	-0.869	-0.2092	-0.2159	-0.3793	-0.5647	-0.4241
NFKBIB	3.0009	0.2596	0.5168	0.6306	0.7296	-1.8964	-0.6493	-0.8174	-0.5368	-0.1617	0.04035	0.1561	0.4713	-1.9893	-0.01785	0.5906	-0.2935	-1.3286	0.3197	0.04226	0.8453	0.8757	1.3183	0.7264	-0.648	-0.5169	1.3784	0.09953	-0.7705	0.03311	-0.02781	-0.9486	9.2091	3.6935	1.7291	2.2167	-0.4084	0.286	-0.6298	-0.4029	0.5871	0.04205	0.2699	-2.5387	0.2258	-0.8029	1.4681	0.3244	-0.4153
CASC3	-0.1137	-0.3419	0.6058	1.0063	-0.7099	0.7534	0.4968	-0.06508	0.2574	-0.3403	1.7538	1.6501	0.9366	-2.2678	-0.9561	-3.6378	0.6648	0.8126	-0.761	1.1566	0.5742	-1.7773	0.3278	1.1126	-0.9535	-0.1063	-0.3158	-0.1079	0.2839	-3.2941	-1.4049	0.19	0.02267	-0.3398	2.708	2.1633	0.5507	0.3068	-0.5715	-0.3025	-0.01755	-0.593	-0.1824	-1.0692	-0.4277	0.2116	-0.246	-0.713	0.007342
IDE	-1.2669	0.5245	-0.708	-1.6492	0.5914	0.1665	-1.4582	0.4154	0.784	0.3256	-0.2149	-2.3185	3.1515	-1.1582	0.04585	-0.4747	-0.1102	0.1042	0.3283	-0.4804	5.7979	-1.7031	0.6544	0.2898	1.2801	3.2583	0.5562	-0.4891	-0.6414	-0.6385	-0.6456	3.5966	-0.2831	-0.9521	2.7451	4.3885	3.2138	2.2444	2.596	-0.709	-0.6614	0.4202	0.3154	-0.551	1.5078	0.2177	-0.02101	5.1264	3.203
CD40	0.04385	-0.8362	-0.06485	-0.7136	0.1849	-0.1953	0.4587	-0.02631	-0.1035	0.5477	0.185	0.3552	-0.1308	0.539	0.4837	2.1541	0.5056	0.3813	0.5275	0.03707	4.1964	1.0899	-0.1464	0.0331	1.443	0.06435	0.4436	0.8188	0.1116	1.5309	0.7352	0.2237	-0.4339	0.002563	1.2084	0.9083	0.1115	-0.2685	1.4855	0.01254	-0.8302	0.4552	-0.6599	2.1559	-0.3615	-0.6233	0.5086	-0.2632	2.0263
MLEC	-1.8374	0.04865	0.1742	-0.2119	-0.0631	0.6344	0.9475	0.6343	0.4142	-0.7083	-0.3863	-0.643	0.1526	0.1383	-1.6265	-4.0652	0.156	-2.6473	-2.2569	0.1689	0.04005	-0.9928	0.1652	-1.0236	-0.5044	-0.7673	-0.556	-0.04057	0.4141	0.1118	-1.2781	0.1455	0.09055	0.003892	-1.6007	-0.5629	0.1954	0.4959	-2.4526	0.09526	-0.9925	-0.4822	0.215	-3.04	0.2216	1.0654	-2.2493	0.04461	2.1134
GLI2	-1.4561	-0.9479	-0.9296	-0.6577	0.2348	0.04837	-0.4215	0.01277	0.1618	0.2342	-0.6161	-1.0351	-1.6714	-1.8826	-0.2494	3.4707	1.6596	0.04354	-2.3768	-0.5356	-1.0069	-0.867	0.1362	1.166	-1.51	-1.0078	-0.2688	-0.9028	-1.1476	-0.6467	-0.1529	-0.04396	-0.8003	-0.4245	0.3872	-0.7221	-1.1332	-0.2423	-1.8534	-0.4913	-0.4398	3.6095	0.2868	-2.4585	0.4042	-0.1413	0.3234	-0.3893	-0.8824
PRPF4	-1.2131	-1.1281	-0.7525	-0.7887	-0.06955	0.06724	-0.8417	0.244	-0.975	0.2	-0.5265	-0.928	-0.4446	0.1044	0.9412	-2.1234	-0.3092	-0.05875	0.835	-1.1492	-1.2805	-0.6303	-0.3468	-1.9944	-0.1325	-0.8074	0.5303	-0.554	-0.424	0.5461	1.6064	-0.2757	-0.3141	-1.882	-0.1904	1.8076	-0.1328	-0.1087	-0.4454	-0.4694	0.6966	-3.6388	0.2857	-1.359	-3.0067	-0.5043	1.4979	-0.6199	-0.8113
MELK	1.5076	1.4656	-0.1129	-0.0646	0.7037	0.9664	-0.7642	-0.7875	0.01297	0.9414	-0.8136	-1.0219	-0.5953	3.3296	1.0611	-3.5682	0.02756	-0.242	0.5633	-0.5028	0.1899	-0.7843	0.7042	0.2072	-1.3578	-0.3184	-0.6424	-0.9853	0.3004	0.5033	-1.0662	0.05508	-1.5619	-0.5383	0.5642	-3.4068	0.2786	-0.2523	-0.7167	1.5983	0.722	-0.03569	1.8375	-1.4142	-0.7617	0.01103	-0.8605	-1.0783	-0.73
USP22	-1.2511	0.8031	0.6667	0.4887	-1.0084	0.619	-1.3904	0.1919	0.2731	-0.5129	0.1642	0	-0.1739	-2.4125	-0.3834	-4.0271	1.0903	-0.7554	-1.4034	-0.1757	-1.5896	-0.6033	0.1605	-0.4341	0.3396	-1.0562	-0.7258	-1.0665	-0.2915	-2.408	-0.495	0.3052	-0.001354	0.5121	-0.4518	0.2274	-0.2112	-0.1107	-0.6408	-0.1472	-0.3834	-0.5731	-0.3541	-1.4613	0.4018	0.5466	-2.1904	0.03636	-0.145
DAXX	-0.978	-0.774	-0.9237	-0.8459	-0.5347	-1.3666	-0.9434	-0.09247	-1.2245	-0.8832	-1.3597	-1.0833	-1.2505	-1.4901	-0.4286	-0.4145	-1.143	-0.6883	1.5603	-0.632	-1.5289	-0.3318	0.0561	-0.2066	0.5111	-1.5494	0.26	-1.0795	1.5997	-0.5499	1.7355	0.1099	-0.02636	-1.5059	1.4635	-2.3672	1.4496	-0.9641	-0.9451	-1.0499	-0.3625	0.9409	0.7094	1.6322	-0.8014	0.08465	-0.05568	-0.786	-0.132
TMED10	-0.7938	-0.2641	-1.477	-1.4221	-0.913	-0.2846	-1.3902	-0.4025	-1.0934	-0.2713	-2.6336	-1.6087	-1.0416	-2.309	0.2849	-1.5362	-0.5552	-1.1236	-0.004202	-0.8712	3.0372	-0.854	0.0134	-0.9985	-0.2813	-0.202	-0.1529	-0.7184	0.8631	0.02302	-4.9472	0.4488	-1.0934	-1.8371	-3.5202	-1.0783	-0.3217	-0.04935	-0.2565	-0.325	-0.5138	-0.01807	-0.473	2.8754	-0.2786	0.3105	2.2722	-0.3071	4.4512
CHERP	-0.4884	0.7484	-0.3917	0.01195	-0.3978	-0.4991	-0.2078	0.2114	-0.1951	0.07575	-1.4342	0.1277	0.07163	-1.2566	-0.8164	-3.784	0.2403	-0.1374	-0.7801	-0.4788	0.4958	0.1811	-0.7529	0.3035	-0.5125	-0.9226	0.01274	-0.1356	0.1795	-0.01712	0.2668	0.1059	-1.4002	-0.6153	-0.0539	0.5897	0.1653	0.1817	-1.7254	0.2489	0.7436	0.6886	-0.4668	-0.6946	0.745	-0.02049	0.3953	-0.5302	-0.336
SMAD3	-0.3717	-0.491	-0.9442	-0.8414	0.3354	-0.1088	0.2013	-6.62e-05	-0.2955	0.3798	0.9512	-0.8305	-1.0347	0.2036	1.3005	-0.3524	0.3334	0.5152	0.7339	-0.2024	-0.4669	-0.6549	1.6588	-0.6549	0.5229	1.0004	-0.4878	-0.8638	-0.9649	1.0276	0.01618	0.1185	0.9565	0.5617	1.1317	0.1448	0.01384	-0.0454	0.5138	-0.6827	-0.294	-0.1805	0.6878	-0.6892	-0.1717	-0.1075	-1.3726	0.01635	-0.09948
OXA1L	-1.4614	-0.8717	-1.0391	-0.5486	-0.3638	-0.2351	-1.1264	-0.3096	-1.6969	-0.5232	-1.1285	-0.3638	-0.0737	-3.2313	0.3265	-4.2225	-0.4969	-1.9368	-1.6542	-0.5683	0.2597	0.5226	0.7308	0.2039	2.286	-3.3491	-0.3109	-1.6665	-0.7503	-3.5442	-1.6555	0.001372	-1.5924	0.7197	0.3469	-0.1463	-1.205	-0.1177	-5.5437	-0.8191	-1.1543	-0.6472	-2.8372	3.0271	0.2239	-0.5351	3.4538	-0.03005	-0.2518
PIK3CA	-0.2777	-1.0674	0.09473	-0.3435	-0.5432	-0.2474	-0.0738	-0.6976	-0.05113	0.0642	-0.2751	-0.3863	-1.0696	0.6792	1.3623	3.1873	0.434	2.1233	1.0167	0.1484	-1.6427	0.7375	-0.1697	-0.115	1.934	-1.1799	1.6624	-0.08321	0.605	3.4331	-0.1487	-0.5785	-0.2562	0.08262	1.4412	1.0224	0.04249	-0.4622	0.2658	0.1215	0.2361	0.8472	0.3109	0.9619	-0.749	-0.0874	1.3978	-0.9612	-0.208
SNX7	-0.09046	-0.4641	-3.8063	-0.6338	0.7782	0.8494	-0.8074	0.6311	-0.277	1.0767	1.2325	-8.0138	0.2264	-1.0904	0.7959	2.0117	0.08839	1.243	0.6739	1.104	-0.09425	1.4651	0.7728	-0.6859	0.899	0.8297	-2.7	-0.7722	-0.002735	1.2732	0.2155	0.4084	-0.2124	-2.6734	-3.2984	-1.9565	-1.1404	-1.5786	-0.9742	-0.07313	-1.1265	0.3988	-0.3247	0.09913	-0.1033	-4.5426	-0.9396	0.906	-0.5417
TRAPPC6A	-0.06216	0.3442	4.8629	-0.1136	0.3362	-0.5058	0.5452	0.3729	0.5559	0.5738	0.4639	3.604	-0.1168	2.7751	1.9272	4.0104	0.346	1.6308	-1.4235	0.5468	0.365	0.5082	0.8988	0.02785	1.3056	-0.1917	4.9459	1.849	3.9899	1.8643	1.0766	0.6609	-0.3307	1.2175	3.8667	1.3507	0.2175	1.9578	1.1839	0.2414	0.6889	0.4322	0.5474	-1.0029	-4.7255	1.855	0.09243	-1.2166	4.3151
ATP2C1	0.5385	-0.5209	0.1273	1.1625	-1.3515	0.8443	-0.1522	0.2337	0.5779	-1.995	-1.6388	0.761	0.4099	-0.5309	-0.3249	0.5823	-0.5986	-0.7742	-0.4541	1.0578	-1.4513	-1.0619	0.2538	0.8926	0.7892	-0.137	-0.897	-0.1142	1.4034	0.3935	0.8488	-0.9779	-0.06146	0.5265	-0.7032	-0.6645	-1.4028	0.06077	-0.4836	0.4176	0.4346	-0.699	0.09036	0.3503	-0.9159	-1.3168	-0.9276	-0.543	-0.08243
CDCA4	-0.3715	2.6697	1.0581	-0.7603	1.7879	-0.475	0.6462	0.2236	-0.386	1.9764	1.97	-0.7826	-0.214	0.8093	0.6061	-1.4443	0.915	2.1019	1.2275	-0.1089	1.0612	0.4838	-0.0409	-0.8759	0.1664	0.7973	0.5877	1.018	0.05957	0.2358	-0.4593	1.497	-0.2394	-0.04112	0.03853	-1.0672	1.9787	-0.1187	0.4936	-0.4808	-0.8033	0.3493	-0.1232	-1.2411	0.7725	1.5139	0.2739	0.02886	-0.642
TBC1D9B	0.53	-0.3545	0.1656	-0.4129	0.3919	0.2663	0.9072	-0.5218	0.4478	-0.388	-0.5085	-1.0823	-1.0642	-0.3991	-0.46	0.2365	-0.01864	0.3766	0.2313	0.5559	-0.2991	0.635	-0.0146	0.3089	-0.04679	0.1789	0.06409	0.5093	0.298	0.02191	-0.7056	-0.229	-0.971	0.2949	0.7782	0.2816	0.04982	-0.1151	-0.2556	-0.4762	1.0099	0.9667	-0.5008	-0.3675	0.9736	1.6012	-0.203	-0.613	0.231
USP14	-0.9181	0.4197	-0.6835	0.2278	-0.361	-0.03661	-1.6252	0.2175	-0.1657	0.4796	0.273	-0.0329	0.1455	0.7901	0.4668	2.5527	-0.1882	0.1626	-0.09748	-0.3113	-1.2376	0.4547	0.08875	0.2088	-0.1716	-0.1996	-0.07526	-1.1936	0.1154	1.3466	-0.8766	0.3465	0.3943	-1.5048	1.1841	0.2456	-0.2723	-0.2487	0.5642	0.2651	-1.5967	-0.3092	0.1887	-0.7657	-1.5669	-1.0973	1.5295	-0.4823	-0.1546
APPBP2	-0.3118	1.0272	-0.1687	-1.1315	-0.3573	0.1735	-1.1641	-0.2895	0.9081	0.03175	-0.5646	-0.9656	0.2716	0.7808	-1.6229	2.1598	0.9316	-0.9248	-2.5661	0.2228	-0.4815	-3.2143	-0.6995	0.5984	0.1279	0.4122	-1.2853	-0.2345	0.5323	-1.0423	-2.0631	-0.1471	1.4661	1.0238	-1.3982	-0.9719	0.6003	1.2814	0.2979	0.2571	-0.8275	-1.2058	-0.4909	0.3539	-0.6426	0.2566	-2.5157	-0.06329	0.5403
CDC20	0.423	-0.295	0.2463	0.8425	-0.5898	-0.4078	0.2711	1.2069	-0.2096	-0.5898	-0.295	-1.724	1.104	-7.6388	0.6471	-3.5412	-4.3485	-0.1931	-6.0631	1.168	0.2766	0.9182	-0.5663	-0.07783	-1.6871	0.2801	0.2297	-1.2593	-0.7506	1.5602	-1.1632	0.4808	-0.1197	-3.0919	0.8367	0.1555	0.8226	-0.4512	-3.6852	0.2274	-0.5946	0.1609	-0.1781	-5.2175	0.4857	-0.845	2.063	-0.1893	0.03962
NARFL	0.17	-0.7587	0.8128	-0.7035	5.2007	-0.6772	0.6652	-0.2342	0.2541	0.6396	-0.2086	-1.7324	0.5086	-0.1967	-0.0211	3.5312	0.8655	0.937	0.2542	0.5475	2.1418	0.7398	1.2166	-0.1244	0.5803	0.8151	0.4978	3.5071	0.2389	1.1155	-0.0919	0.7388	-0.02998	-0.08977	1.3968	1.717	-0.00201	-0.01662	1.2583	0.1801	-0.4809	0.4504	-0.2922	-0.4235	-0.3012	-0.5112	-0.2885	-1.4669	0.6181
RPS6	0	0	-0.2857	0	-1.0165	0	0	0	0.02018	0	0	0	0	-0.2167	0	-3.6834	0	1.0987	0.6411	0	0	0.4424	0.8849	0	0.27	0	0.3135	-0.7651	-0.2943	0.3178	0	0	-0.3396	0.2476	0.212	0	0	-0.1117	0	0	0	0.3429	0.7458	-0.9987	0	-0.5521	-0.09279	0	0
DDX42	0.3066	0.733	-0.06397	0.3987	-0.3225	1	1.343	-0.4544	-0.2615	0.6643	0.5979	-0.4245	-0.8623	-0.3917	-1.6213	0.1021	0.9702	0.1048	-1.1322	-0.09226	0.0034	-1.1359	-0.2817	0.7156	-0.1063	-0.7733	0.1881	-0.6556	0.2653	-1.1296	-0.4621	-0.08322	-0.2088	0.4931	1.276	1.016	0.1254	-0.5423	-0.972	-0.2387	-0.08695	0.335	1.555	0.4659	1.3228	-0.2899	-0.9432	-0.1384	-0.5493
ECH1	-0.8972	-1.2278	-0.1886	-1.0831	-0.308	-0.7496	-1.2727	-0.06489	-0.05267	0.699	-0.4177	0.2885	-0.2856	0.234	-0.0441	2.747	-0.165	1.3546	-0.2665	0.3126	0.1997	-0.1463	0.7308	-0.4437	0.5975	0.01463	-0.5629	0.7034	1.3612	1.197	-0.1292	0.05388	-0.1409	-0.1627	-0.1494	-0.5112	-0.3087	0.0406	1.4015	0.5194	-0.0304	-0.02835	-0.7351	0.1143	-1.0827	0.2225	-1.7626	-0.02762	0.6171
HDAC2	-0.2799	1.6588	1.9661	1.1809	0.471	0.227	0.2682	1.2652	1.1062	-0.0819	1.0859	-0.4992	1.2743	-1.3989	0.8386	-1.2759	1.4974	-0.1751	-1.704	0.1493	0.00695	-1.7285	-0.6712	-0.3274	-1.0022	0.8201	-0.0006087	0.6522	0.05624	-1.5219	1.6533	1.2034	0.9186	0.06299	-1.2596	0.3581	0.6376	0.6357	1.4854	1.7187	1.7524	-0.2016	0.05666	-1.1304	-0.814	-0.01896	-0.0156	0.04258	-0.2073
IKBKE	0.392	-1.0203	3.2547	-1.5901	-0.5395	-1.3141	-1.0391	2.2571	-1.0137	-1.1709	-0.8602	-0.7	-0.3205	-0.8439	-0.743	2.5089	-1.5982	0.5932	0.3134	3.0565	-0.09825	-0.4206	-0.5365	0.1343	-0.3701	-0.4034	-0.3222	-0.4633	2.9221	2.3405	2.0091	-0.543	-0.4373	-0.2171	-0.4988	2.2853	-0.9484	-0.2458	-0.5799	-1.054	4.4864	0.2121	-1.1214	0.7607	-0.8448	-0.1876	0.8996	3.1002	-0.8486
CCL2	0.1917	1.0919	0.5214	-0.4614	-0.0968	-0.1091	0.3061	0.1233	0.7236	0.6924	0.0014	-0.4416	-0.01642	0.06159	0.6041	0.1408	2.5902	-1.0229	0.5178	-0.3207	-1.1208	-1.3837	0.0053	-1.0513	-1.7385	0.02221	1.4127	0.2145	-0.3067	-0.5004	0.1992	0.04769	-0.1046	0.424	-1.3119	-1.5459	-0.3973	-0.218	0.8889	-0.07814	2.1805	-0.2185	0.1278	-2.2217	-0.4391	0.1263	-3.0089	0.08778	0.1723
DFFA	0.2788	-0.1799	-0.1951	0.6539	0.9615	0.08727	1.2481	-0.2353	0.2077	0.3569	1.2025	1.4332	0.5685	0.9163	-0.3409	2.1516	0.3187	0.2032	-0.2468	0.6743	-1.0713	0.7171	0.1023	-0.6961	-0.3165	0.6311	0.2106	0.9037	-0.2588	0.3045	0.9295	1.1237	0.8379	-0.06959	1.6735	-0.5229	0.6224	0.2615	0.9242	0.8505	-1.2038	1.3584	-0.5112	-1.7323	0.8725	-0.7109	-1.5916	0.6502	0.08665
MRPL19	0.9334	0.3926	-0.6029	0.0988	0.6475	-0.6722	-0.9164	0.06633	-0.1215	0.9324	0.5036	-0.1998	-3.4674	-2.1345	1.4821	1.0691	0.841	1.4185	-0.4542	-0.8608	-1.4089	0.05925	0.4529	-0.663	-0.5811	-0.2029	0.497	-0.5207	0.04161	1.514	-0.3054	0.3272	1.2955	-0.2178	1.1038	1.9105	-0.7047	-1.1497	-0.06361	0.5582	0.8001	0.8979	0.983	-0.7726	0.3748	-0.5806	0.6947	-2.7656	0.4822
WDTC1	0.5249	0.0262	-0.6828	4.4066	-1.1798	-0.9269	0.2156	-0.2436	-0.1112	-0.4156	0.03685	0.268	2.2699	-1.0535	-1.0172	0.4756	0.1419	1.5803	-0.383	-0.5505	-2.4078	-0.6091	-0.07	-0.2068	1.1025	-1.0515	-0.3214	-1.0249	0.2447	-0.7663	0.5406	-0.07247	-0.8087	-0.0571	1.1747	2.0045	-0.3867	0.2782	-0.4703	-0.2431	-1.345	-0.8831	0.1665	2.0035	-0.03305	1.2499	0.115	1.1278	0.3543
PLSCR3	-0.4757	0.108	2.1978	0.1396	-0.0023	0.9075	-0.02935	0.664	1.1005	-0.2732	-0.1366	4.8291	-0.795	0.06572	-0.02565	-1.2737	0.6233	0.2521	1.9639	2.1847	1.3479	2.2965	-0.8531	-0.4862	-0.5222	1.1747	1.2117	1.6038	1.2414	-0.2593	-0.1821	0.09583	0.4791	1.5047	4.699	-1.1229	-0.2332	1.0859	-0.1535	0.4708	2.4871	-0.2617	2.1912	1.4891	-0.5529	1.0007	0.4166	1.0189	-0.5103
SUZ12	-0.2584	0.5527	-2.308	-0.0479	0.4358	-2.6074	-0.2199	0.06585	-1.6682	0.3808	0.9416	-3.1376	-0.4034	0.4319	-0.349	1.5928	0.6702	-0.5337	-3.4313	-1.337	-4.2873	-5.3491	-0.6485	0.1035	-0.6516	-2.8157	-2.9317	-2.3051	-1.1967	0.409	-0.0476	-0.1735	-1.4312	-2.6524	-6.1784	-0.01656	0.169	-1.451	0.3531	0.9665	-0.4839	-0.2251	-2.5434	-3.8342	0.05569	-0.8685	-3.3574	-1.6441	0.627
CSNK2A2	0.03139	-0.9162	-0.4932	0.1699	-0.7867	2.9477	-0.1533	-0.1386	1.1752	-0.7753	-0.9101	-0.3637	2.9655	-0.1347	-1.7387	2.5585	0.2079	-0.5421	0.8968	-1.128	-1.229	1.987	-1.0968	0.435	0.428	0.531	0.7447	1.8755	1.1536	0.1662	0.5968	-0.394	0.5286	-0.6382	0.9498	0.8665	-0.2812	0.2191	-1.2289	-1.2532	-0.4225	0.04194	1.2336	1.4738	1.3581	0.8155	1.7807	0.7048	0.4415
H2AFV	-0.01286	-0.1696	0.4289	-1.4002	0.2162	-1.5269	-1.3448	-0.459	-0.9816	-0.3305	0.9443	0.408	-3.6208	-0.8781	0.7898	0.9064	-0.5983	-0.484	-3.7387	0.5333	0.9596	-3.3793	0.2977	-0.6484	-0.1553	-1.2835	-0.5219	-1.5369	-1.4732	-1.4006	-0.2208	0.6417	-0.8328	0.6374	-0.2844	-0.6813	0.5884	-0.8238	0.6574	0.8116	-0.2291	-0.1937	-1.4026	-3.553	-1.6852	-1.8176	-1.4889	-0.7574	-0.365
NUSAP1	-0.8363	-0.0094	0.1376	0.22	-0.0117	0.002163	-1.3226	-0.03633	-0.5616	0.2224	0.7864	0.5492	0.1835	-0.4965	-0.1901	0.08453	0.4937	0.4969	-4.8103	-0.2479	-2.0942	-2.635	-0.8094	-0.8332	-5.2414	-0.003541	-3.8027	-0.2478	1.1758	-1.224	-1.8202	0.3079	-0.5506	0.1253	-1.3096	-0.9894	0.4094	-0.9967	0.4526	0.7989	-5.1625	-0.7918	0.4973	-4.7394	-0.5522	-0.1119	-2.1973	-2.2261	-2.2502
TICAM1	-0.3306	0.472	0.04125	0.0293	0.252	-0.4274	0.9912	-0.6248	0.2326	-0.903	-0.7566	-0.1482	-0.5338	3.1237	-0.2864	1.5974	0.3448	-1.013	3.5549	0.4749	5.1073	2.0007	-0.2864	-0.1377	-2.1094	0.7518	0.4658	-0.01965	-1.4282	0.539	-1.2093	-0.5438	1.8136	-0.1682	0.6486	0.8135	-0.3379	0.4135	-0.0656	-0.78	1.2221	-0.06802	0.2276	-0.6806	0.1359	-0.2097	-1.8314	0.529	-1.2318
FAM69A	1.5672	0.3591	0.4272	1.7832	-0.3058	1.0679	0.6937	1.7086	-0.2444	1.2392	0.8166	0.3245	1.1869	1.1351	0.1762	2.4659	0.588	-0.9514	-0.3574	0.357	0.605	0.1007	-0.822	0.622	-0.2412	1.1999	-0.3464	0.7017	-0.1165	1.3306	0.8161	0.528	-0.1034	0.06657	0.4423	0.9584	0.3127	-0.04527	1.9242	-0.4393	0.07525	0.09356	-0.5176	-0.7049	0.501	0.6439	-0.7554	0.3834	0.8855
KIAA0100	-1.6893	-0.3196	1.0166	-0.6226	0.4771	-0.04368	0.3639	-0.05471	0.7392	-0.9684	0.2761	0.4394	-0.2716	-0.1478	0.05445	-2.9253	0.929	-0.3548	-0.215	0.6546	-1.6209	1.5141	0.15	-0.832	0.7231	-0.9478	0.5485	-0.8171	-0.3856	-1.0711	0.03929	-0.3384	-0.3232	0.6031	-1.0486	1.5138	-0.1881	0.5976	-0.4665	0.5414	-0.9766	0.4763	0.3442	0.004795	0.7165	0.01537	-0.2653	0.3895	-0.1785
PAICS	-0.5852	0.5899	0.6804	0.5595	0.2341	0.6642	0.08785	0.318	0.7147	0.0439	-0.1237	0.0119	1.3932	-0.3198	-0.1009	-3.9611	0.2604	-2.3366	-2.8787	0.3014	1.0288	-1.1368	-0.8393	-0.1641	-2.4977	1.1029	-0.2293	0.4114	-1.4583	-2.434	-0.5204	-0.02538	0.4452	-0.2434	0.4737	0.3588	0.3586	0.8227	-0.2114	0.7454	0.2806	-0.5886	-0.2285	-4.1388	-2.0977	0.2373	-1.4722	0.8384	-0.1292
SRC	0.5734	0.1723	-0.3441	-0.476	0.0039	3.438	0.1799	3.0486	1.0399	-1.1704	-0.0795	1.0509	3.3794	2.1013	-1.1671	2.5406	-0.1002	2.1597	0.7845	-0.4103	5.5054	-2.0835	-0.2141	1.7748	-1.9243	3.022	-0.2616	-0.09017	-0.4411	-2.6289	2.0616	2.7436	0.09013	1.9043	3.8973	2.4679	0.0007412	1.4429	-0.2151	2.0037	0.0665	-0.5414	-0.2185	-0.2792	0.326	-0.3237	-0.9738	2.7526	-0.6001
BMP4	-0.6263	-0.3953	0.006306	-1.133	0.1725	1.6746	0.7851	-0.1976	-0.006094	0.4017	0.7354	0.1216	-0.1354	0.5416	-0.01765	3.3288	1.8782	0.6775	-0.5816	-0.02937	4.1195	0.7479	0.4486	-0.3971	0.6617	-0.5573	0.6134	2.5957	0.9111	3.77	0.4742	-0.1782	-1.4711	-0.5279	1.8708	-0.1017	0.5429	-0.317	0.4772	-0.8161	-0.714	0.3996	-0.1944	0.1053	-0.04026	-0.7365	-0.9084	0.9108	0.2632
CDK2	-2.887	-1.0709	-1.4504	-1.409	-0.396	-0.9411	-0.5914	-1.0723	-0.5501	-1.086	-1.3984	-2.1928	-1.5893	1.6781	-0.7633	-1.0926	-0.4617	0.6732	-0.08392	-0.5221	-0.8063	-1.489	-0.8194	-0.7576	-0.8814	-0.6929	-0.01518	-1.1949	0.3156	-0.4795	-1.1711	-0.3362	-1.889	-1.0584	-1.6358	-0.9976	-0.1558	-0.6436	-1.0819	-0.3762	0.2173	0.3893	0.1011	-1.6154	-0.6686	0.009628	-0.4074	-0.6632	-0.4334
EDN1	0.178	0.4368	-0.1478	-0.3444	0.7895	-0.1205	0.6622	0.2742	-0.1092	0.345	-0.7315	0.0707	0.2813	1.622	-0.1627	0.9876	1.2203	1.873	-4.0701	-0.5576	0.4905	-0.0776	0.5915	-1.8621	-4.1331	0.8882	1.9242	0.3641	-1.5565	-2.047	0.4122	-1.2756	0.6095	0.8277	0.3859	-3.7871	-0.08848	0.2139	1.3195	-0.1843	-0.102	0.4384	-0.9713	-6.3162	0.8684	0.9914	-5.1712	1.303	-1.0785
XPO7	-0.4003	-0.0895	-0.8262	-0.4545	-0.9694	-0.9279	-0.846	-0.7677	0.0878	-0.3284	-0.6617	-0.8005	-0.07948	-2.0991	-0.3229	-3.6214	-0.1264	-0.1636	-1.8461	-0.8736	-1.1293	-0.08355	-1.1011	1.2613	-2.9763	-0.3683	-0.6487	-1.0858	-0.817	-1.0626	-1.2345	1.6597	-1.8641	0.2235	2.3476	1.5015	-0.2074	0.09182	-1.1704	-0.4423	-0.3781	-1.006	1.8368	-0.6329	0.6644	0.1957	0.5248	-0.6397	-0.3815
FAIM	0.2331	0.4464	0.3553	1.9222	0.4785	0.8193	2.3389	1.9039	0.39	1.117	0.3558	-0.2981	0.5687	1.0237	-0.4911	3.8242	0.4354	0.3952	0.2842	0.8676	0.1629	0.6226	0.4742	0.3572	0.9403	0.203	-0.08081	3.5872	1.4396	1.0446	0.2747	0.413	0.9391	1.5678	1.2717	1.4964	-0.1031	-0.3069	3.7493	1.0144	0.2443	-0.4681	-0.3708	-0.6878	-0.1974	-0.817	-1.337	-0.3269	0.9758
KIAA0494	0.2962	-0.7247	-1.385	-1.3127	-0.9212	-0.1242	-2.0719	-1.3524	-0.7418	-0.8101	-2.3489	-0.0621	-1.1313	0.6202	-2.3484	0.2973	-2.0451	-1.9436	0.6449	-0.09589	0.0851	0.906	-0.1181	-0.1261	-0.05823	0.744	-0.6048	-4.6128	0.1555	-0.09413	-2.3439	-1.0443	-0.7535	-1.0513	-1.8222	0.9017	-0.1774	0.2661	-1.7866	0.2394	0.3918	-0.6904	-0.03856	-3.216	0.5364	0.05501	-1.923	0.02152	-0.3118
PXMP2	-0.1402	0.2891	0.1852	0.8116	-0.3672	-1.2863	-1.0757	-0.4765	0.4962	0.1429	0.5132	-0.4741	0.2088	0.8311	-0.8985	-1.3193	1.8634	1.2648	-3.4099	-0.5646	1.2732	-2.8661	-0.4911	-0.5178	-1.9961	-1.071	-1.3589	-0.1392	0.8283	-2.8999	0.03207	0.4559	-0.07995	0.2673	2.218	-3.6953	0.3865	0.6867	0.0213	0.03134	2.741	-0.4888	0.2891	-3.6556	-0.3074	-0.1017	-3.0024	-0.6786	0.5777
SQSTM1	0.5702	-1.1359	0.03078	0.4211	-0.306	-0.658	-0.2921	0.1666	-1.0578	-0.3564	0.04705	0.1502	-0.6897	0.8542	-0.1697	-3.2788	-2.1292	-2.4613	3.5992	-0.2429	0.7609	3.957	0.1746	3.6785	1.5747	-0.2198	0.6569	-0.1335	-0.1637	2.57	0.9046	-0.411	-0.2394	0.3582	0.9126	2.4182	-0.09917	-0.6357	-0.9727	-0.8317	-3.7564	0.2606	1.2765	4.4492	1.006	-0.8386	2.1808	0.1828	-0.3061
HIF1A	0.6007	0	0.46	0.0234	0.5053	0.6477	-0.1391	0.5958	0.1968	0.5023	0.3758	0	0.06731	1.347	1.0189	1.843	1.1231	-0.947	2.4669	-0.1018	-0.1256	1.1365	-0.6045	0.5455	2.7163	-0.07385	-0.4535	-0.09887	-0.517	2.7399	0.8362	-0.06838	-0.3602	0.6762	-0.8255	1.2586	-0.2114	-0.497	0.4696	0.1125	-0.1391	-0.1082	-0.1697	0.6616	0.9372	-1.5364	2.5684	-0.3925	-0.6165
TIMM17B	0.6022	-0.5212	-0.6606	-0.2868	0.3661	-1.7453	-0.412	-0.4105	-0.7993	0.1674	-0.6754	-1.4418	-0.7092	2.5694	-0.4334	-4.0465	-0.03875	1.3248	-0.2818	-0.03657	-1.2077	-0.1994	1.0156	0.005456	1.2445	1.9919	-0.0575	-0.3443	1.4821	0.2462	-2.9098	-0.04833	0.2313	-0.6549	1.3238	-0.4374	-0.4152	0.3591	-0.6847	-0.1308	-0.5455	-0.5289	0.7573	-0.01582	-0.1972	-0.8664	-1.0058	-0.5848	-0.06186
STXBP2	0.076	-0.01885	0.03078	-0.4541	-0.0867	-0.1474	-0.139	0.3981	0.2364	-0.4414	-0.4083	0.2385	-0.72	-0.2285	1.5903	0.8785	-0.02002	-0.621	-0.427	0.3519	-0.9442	-0.2846	0.2748	-0.04977	-0.4168	0.1685	-0.1003	-0.3621	-0.6637	0.7759	0.5315	0.07618	-0.6572	0.504	0.671	-0.1743	-0.203	0.524	-0.1013	-0.3321	0.7921	-0.1272	0.004416	-0.016	0.0589	0.02802	-0.4178	-0.9534	0.089
WRB	-0.03155	0.6865	0.3564	0.7527	0.8794	-0.2014	-1.1864	-0.2205	0.2444	0.457	0.3306	-0.1309	0.5848	-0.04464	-0.2854	-0.795	0.334	0.2392	0.8796	-0.07497	1.7658	0.2642	-0.1297	-0.1758	0.694	-0.3775	0.1556	0.2707	0.4153	-1.0061	0.07491	0.355	0.5698	-0.2708	-0.2821	0.2077	-0.0899	-0.6099	-0.03734	0.8268	0.1833	0.071	0.5505	0.7055	0.3163	-0.1755	0.3449	-0.179	0.1488
ETFB	-0.8191	-1.6547	-0.38	-0.6913	-0.03975	-0.7892	-0.07945	-0.9891	0.4517	-0.6263	-0.7373	-5.7846	0.6979	2.8062	0.1741	-0.4582	-1.5613	-2.2927	0.346	-4.2823	0.3005	-2.2429	-0.7079	-0.941	1.0019	-0.9472	-1.0984	-0.2831	0.5786	-1.1688	-3.5007	-0.2141	0.1169	-0.6286	0.7246	1.2037	0.7018	0.3525	-0.3587	-1.412	-0.6192	-2.0779	0.5328	0.5332	0.01364	-0.2362	1.7469	0.9438	-1.2525
MNAT1	0.2799	2.801	0.6996	0.4538	0.2431	2.1978	-0.4737	1.1562	0.6858	0.8744	0.05365	4.1953	0.8218	-0.3503	0.6435	0.3818	1.3966	0.8931	-0.7595	1.8187	1.4785	1.2513	-0.3737	0.5061	0.2859	1.7894	0.1989	0.1833	0.6051	0.4251	0.3855	0.3209	-0.4185	-0.4125	-0.7326	0.9935	0.4121	-0.5176	-0.1793	1.49	0.9925	-0.6338	0.3553	1.056	0.1599	-1.0681	0.9955	0.2797	1.0523
CAMSAP2	-0.01282	-0.6604	0.03849	-0.0145	0.07425	0.3623	0.6358	-0.04209	0.04406	0.7568	0.8461	-0.2229	-0.1612	1.3862	1.027	3.7803	1.1639	1.5396	0.5954	1.6124	-1.1554	1.7449	1.023	0.2187	1.1547	-0.01011	0.4166	0.4574	-0.1728	3.2696	1.3434	0.5231	-0.01989	-0.2088	-0.08048	1.2979	-0.238	-0.1262	1.4302	0.3293	0.132	1.3907	0.01637	1.8416	-0.8408	-0.7313	0.4425	0.6068	-0.1461
HPRT1	-0.01243	1.0205	1.1465	0.1051	-0.0331	0.368	-0.9489	-2.4186	0.6316	0.3518	1.0965	-0.5969	0.5094	1.1135	0.182	-3.2563	0.296	-0.3303	-1.3735	-1.5291	-1.6882	-2.469	-2.6845	-0.3658	-0.8796	0.9215	-0.3683	0.7896	-1.6433	-2.3466	-1.1674	-2.6668	0.593	0.4777	-4.3909	-0.4141	1.0822	0.9153	0.9847	0.601	-3.3999	-2.1675	-0.3146	-3.7157	0.7608	0.5136	-0.5728	-1.6613	0.2291
ARNT2	-0.005128	-0.9801	0.5774	-0.439	-0.1836	0.3207	0.8726	-0.03677	-0.04014	0.9447	0.8872	-0.8429	0.07078	0.7142	0.2356	1.7922	0.7747	0.946	-0.09636	0.3876	-0.8183	0.691	0.2087	-0.3171	0.515	0.1764	0.3485	0.9981	0.3894	1.0577	1.0597	0.1633	0.3685	0.1266	0.222	0.6657	0.6902	-0.1896	0.9376	0.1937	0.0472	0.3278	-0.06208	-0.2475	-0.5772	-0.07509	-0.5753	-0.4007	1.1246
RRS1	0.9788	0.5058	0.8833	0.8793	0.2228	-0.5018	0.2745	3.1404	-0.5811	-0.1267	-0.6428	1.8455	-0.6773	-2.2088	0.0783	-0.1905	0.5481	0.2003	-0.6014	-1.2789	4.1219	0.6472	0.2028	-0.5211	-0.05867	-0.07521	1.4819	-0.2532	-1.1519	-0.02022	0.08374	-0.5994	-0.02489	-0.6514	1.373	-1.5123	-0.8619	-0.5043	-0.2715	0.09087	0.1511	0.873	0.8942	-1.5115	0.08123	-0.04901	1.2521	-0.2798	-0.853
ADAT1	-0.299	-0.6499	-0.04964	-1.2278	-0.9337	-0.4622	0.1499	-0.4257	1.556	0.3243	-0.2349	-1.0109	-0.3472	0.9938	0.2298	3.1736	-0.02507	1.4278	-0.7399	-0.107	-0.4728	1.2666	-0.1548	-0.8026	0.08512	-0.6864	-0.4659	-0.8543	-0.5973	1.3677	-0.1317	-0.1831	-1.1823	0.02035	0.4492	-1.1909	0.4088	-0.1818	0.2087	-0.2188	-1.5689	0.3384	0.05851	-0.5281	-0.007314	-1.6197	-0.5712	-0.4413	-0.4071
SPAG7	0.09747	1.0664	1.199	1.9116	1.0027	0.8255	0.7113	0.3541	0.05484	0.7561	1.8359	-0.0072	0.03918	1.0049	1.3915	1.4855	1.0132	1.1064	1.1417	1.13	-0.1974	0.0799	-0.3047	0.1156	2.2724	1.2343	0.1739	0.5396	1.5444	1.1666	0.5291	0.2396	0.8303	0.7133	0.259	0.8982	-0.7543	0.1383	1.0238	-0.041	0.501	0.1678	-0.3093	2.5616	-0.5965	-0.3431	-1.1256	0.1235	0.5419
MAPK1IP1L	0.6496	0.5155	-0.7575	0.1014	-0.2116	0.2918	-0.5422	-0.2598	0.2782	-0.9352	-0.5236	0.7367	0.2557	0.6766	0.9004	-0.1072	0.338	-0.5082	-0.5202	0.1935	0.6697	-0.1305	-0.1651	0.5335	-0.3663	0.7445	-0.1662	0.1165	-0.7336	-0.07862	-1.1719	0.1901	0.6189	-0.2798	-0.09937	-1.265	0.3092	0.1455	-0.3187	-0.3869	0.02725	-0.35	0.7619	-0.4387	0.2409	0.5399	2.8264	0.4194	-0.3559
SCAND1	-0.7943	-0.3365	0.5603	0.09975	0.7821	-0.8101	0.0144	-0.04556	-0.03595	0.09935	0.7713	-1.3765	0.2476	-0.7621	-0.1142	-1.0435	0.1784	0.2653	0.8277	-0.4273	-0.4684	-0.4615	-1.7731	-0.6073	0.1577	-1.0636	-0.2545	-0.4224	0.6734	-0.1314	0.637	-0.333	-0.3808	-0.03096	0.3501	-0.9428	-0.05938	-0.7887	-0.7843	0.5598	0.4568	-0.01289	-0.3586	0.5518	-0.7828	-0.9193	-1.6195	-0.8118	-0.1733
MFSD10	-0.3924	-0.1614	0.8775	0.06255	-0.6037	-0.382	-0.3752	0.05673	-0.3149	-0.3017	0.072	1.228	1.0216	0.661	-0.5629	0.1463	1.5516	-0.4424	1.6846	0.4961	-0.4836	-0.3575	0.3033	-0.02212	0.4008	0.1913	0.2351	0.3066	-0.4429	0.2389	0.5456	0.5326	-0.03797	0.7934	-0.6687	-0.8163	-0.4778	0.05156	-0.3159	-0.5365	-0.248	0.4115	0.004348	-0.9278	0.7797	-0.1789	0.01063	-0.02873	-0.1112
MSH6	-0.3819	0.8059	-0.5775	-0.2748	0.5249	0.8636	1.0057	0.5582	0.3032	0.7244	-0.4911	-0.2273	-0.1716	0.002866	0.4555	-0.5308	-0.6056	-0.4523	-2.4743	-0.2414	0.6538	-1.7867	-0.375	0.4288	-1.1452	0.385	-0.9299	-0.6381	0.7061	-1.4038	-0.5756	-0.2207	0.2154	-0.5366	0.06566	0.2454	0.6211	0.4045	0.006235	0.6078	0.3059	-0.7175	0.2338	-0.968	-0.04412	0.4763	-1.4627	0.04322	0.2391
COPS7A	-0.9443	-0.4505	3.5001	-0.5148	-0.702	-1.0333	-0.5097	-0.2681	-1.042	-0.5504	-1.2145	0.0724	-1.1277	-1.8769	0.9171	-1.0398	0.4533	1.044	0.8549	-0.04882	-5.3188	-0.1209	-0.4453	-0.08951	1.7219	-0.2228	0.5815	-0.6444	0.182	0.5274	-1.3835	-0.6306	-0.0889	-0.9128	3.5918	-2.469	-0.5649	-0.8607	-1.017	-0.6633	-0.6105	1.7047	0.4949	-0.4233	-0.3402	0.7571	2.475	-0.3198	-0.7116
UBE2C	0.1774	0.399	1.1934	0.5917	0.4409	0.2225	-0.02515	0.8622	0.4928	0.2754	0.6229	0.2908	1.029	-3.914	-0.5724	-3.1964	0.5635	-0.3481	-4.3067	1.1942	-0.3678	-2.0901	-0.7143	-0.985	-0.55	0.3867	-0.8274	0.2549	0.8964	-1.45	-0.7823	0.3765	0.2242	-0.2441	-1.8542	0.5123	0.2123	0.6792	0.7567	0.7688	0.1271	-2.145	0.3222	-3.3092	0.003426	-1.4068	-3.1309	-3.587	1.0538
FIS1	0.781	0.4551	0.3326	-0.7093	-3.525	0.6639	-0.2009	0.06932	-1.4331	0.457	-2.4365	0.3001	-1.7961	-0.4494	1.0028	-1.2157	0.4424	-1.2653	1.0424	-2.6255	0.6596	-0.196	-2.7227	-1.2358	-0.08531	-0.6489	-1.9263	-3.5616	-1.1454	-3.1551	-2.9004	-1.8479	-0.338	-2.1375	-1.2792	-4.069	0.1993	-1.5944	-0.8143	-1.346	-2.1482	0.6374	-0.9176	-0.6722	-0.5543	0.1099	0.5137	-1.5524	-2.4813
HS2ST1	-0.5589	-0.4187	-0.9972	-0.7678	3.1207	-0.594	-0.3792	-0.8424	0.8343	-0.7154	2.3358	-0.2991	1.592	-0.6539	-0.9323	3.3691	-0.009366	1.5106	-1.209	3.0247	-1.6255	-1.0296	3.1768	0.8216	2.4412	-1.9664	1.3404	2.4626	1.2223	3.8335	-0.2763	1.9273	-0.8016	1.1071	1.7764	0.844	-1.5353	0.8676	1.046	1.3796	2.6788	-0.218	0.9483	1.2089	-0.9721	-0.1183	0.3551	0.4896	1.3612
NUDT9	0.02944	0.2891	-0.4833	-1.0776	0.372	-1.4777	-1.473	-0.6147	-0.4722	0.1768	0.4614	0.9052	-0.07984	-0.9942	0.8174	1.7727	-0.1618	-0.2453	0.1395	-0.005499	-2.2299	0.0664	1.3404	-0.03271	0.9384	-0.8026	0.5969	-0.2929	0.2369	0.7714	0.6417	0.5539	-0.3013	0.3524	2.0554	2.8877	-0.02607	-0.7641	0.4667	1.2972	0.9286	0.6994	6.6917	2.5995	0.3545	5.1689	1.1865	-0.3848	0.9163
TXLNA	0.9832	0.2988	0.1302	-0.3225	0.1205	0.4691	0.3043	0.7411	-0.2442	-0.1816	0.073	0.2981	0.7143	2.0856	-2.3507	-3.7061	0.7187	-1.9385	-0.2139	-0.1238	1.0303	-1.7687	-0.4288	-0.3233	-0.8579	0.3092	-1.9786	0.2522	0.3456	-2.6199	-2.1526	0.2577	-1.1127	1.2121	-1.9911	0.3586	-0.08033	0.6129	-0.6596	-0.2269	-0.1144	-0.4062	-2.4221	-0.3543	0.943	0.4345	-3.3922	0.9431	-0.2418
CSRP1	2.23	-3.9505	0.3831	-0.2253	-0.6461	-3.0729	0	-3.2833	-0.5308	-0.257	-4.8565	0	1.4261	2.747	-0.9031	-5.3455	-2.7645	-2.1078	-0.8756	-3.2134	-4.6685	-3.8594	-0.8515	-2.0577	-1.4886	0.02253	2.0919	0.09286	-0.7973	0.7683	-2.1626	-2.8946	1.7356	-4.3111	-0.3124	-6.8718	-2.6389	-0.5891	-3.2308	-3.2575	-0.6461	-0.2081	0.1995	-5.6156	0.295	0.7132	-1.2652	-1.9129	1.034
DNAJB1	0.4069	4.9282	-1.1186	3.6151	-0.5132	-0.1013	-1.1236	-0.4242	-0.6315	-1.145	-0.3847	-0.0423	0.5558	0.1569	0.07205	-3.6387	0.577	-1.7425	5.0108	-0.1359	-0.0634	0.4516	-0.4979	1.0203	0.908	-1.1944	-0.1002	-0.8757	-0.7068	-0.6327	-0.06438	0.1121	-0.5445	-1.7903	-0.7884	-0.4931	0.1391	-0.4557	-0.4173	-0.4723	2.7939	-0.2646	-0.5668	3.7623	-0.7317	-0.2748	1.4909	-0.6273	-0.5827
METRN	2.0159	-0.1253	1.9683	1.1837	1.3567	0.6556	2.3068	1.1307	1.0639	-0.0847	-0.3017	3.149	1.5418	0.0454	1.8212	0.4307	0.4772	0.1157	-0.5892	1.4166	-1.2467	0.1418	0.7125	-0.5731	-0.584	1.019	1.391	-0.6577	0.9864	0.9129	1.5875	1.1219	0.02941	0.06054	0.09015	-0.5734	-1.3279	0.4418	0.2427	2.0193	2.2754	-1.2188	0.8417	-0.452	1.1854	0.2406	0.1697	0.7208	1.8318
TOPBP1	-1.5552	-0.4854	-1.2387	-1.4846	0.3894	-1.3134	-0.4893	-1.5547	-0.8768	-0.2741	-0.3472	-2.5661	-1.3797	-0.5064	-1.0674	2.9214	0.4459	0.5817	-0.9161	-1.7701	-0.8896	-0.6829	0.4862	-0.05966	-0.456	-0.2267	-1.0818	-0.4046	-0.515	0.2833	-0.6082	-0.4381	-1.0061	-0.04121	-1.0267	-1.8764	-1.1509	-0.3022	0.393	-1.9637	-0.455	0.3704	0.7006	-2.5397	-0.8754	-0.0009916	-0.3346	-0.6723	-2.0372
ABCF1	-1.4984	0.1651	-1.4116	0.0147	-0.7064	-1.0239	0.3853	-1.1679	-0.8164	0.5429	-2.0391	0.4998	-0.3433	0.0673	-1.0568	0.3765	0.1715	-0.978	-0.08784	-0.2472	0.6899	0.8872	0.1425	-0.1625	-0.4518	0.4361	0.8052	-1.416	0.3513	1.2646	-0.3552	-1.0361	-0.4802	-1.0867	1.3526	-0.5141	-0.1308	-0.2131	-0.5599	-1.1282	0.859	0.9485	-0.9084	-1.2449	-0.7014	0.3658	-1.2593	0.09639	-0.3142
TCTA	0.4097	-0.35	1.9979	0.2657	1.3607	2.6994	0.3521	1.2385	1.1494	-0.286	2.3572	0.1475	0.4532	2.6295	0.8165	0.2394	-0.2233	0.5689	1.5669	0.9757	-1.4511	0.2178	-2.3535	0.8752	0.7722	-0.246	-0.2521	0.5096	0.1001	0.6958	2.2524	0.5924	-0.2273	1.2767	0.1721	-0.2226	-0.6413	-0.07313	-0.8874	1.8141	-0.7	-0.7044	0.5358	0.05068	0.8989	0.4732	2.9815	-0.9529	-0.1833
LGMN	-3.2774	-0.1229	-0.3868	-0.9753	-0.4319	0.3162	0.3322	-0.1216	-0.1638	-1.6386	-0.9804	-0.0973	-0.5262	2.0911	-1.696	-3.7397	-0.9197	-0.203	-0.2962	-0.09676	2.0942	-1.9766	-0.7727	-0.2775	-3.8069	1.4134	-0.3079	-0.1416	0.9249	-2.646	-1.8606	-0.133	-0.3213	0.1978	-0.3575	-0.5189	0.1349	-0.1142	0.6507	0.1122	0.2292	-0.4616	-0.3307	-2.9308	-0.5055	-0.01106	-2.7413	1.4328	-1.2096
TLK2	1.8099	-0.2116	-0.3826	0.5666	-0.4011	-0.2479	0.5124	-0.7099	-0.2305	2.9831	-0.1461	-0.1944	-0.2219	-0.1097	-0.3796	2.1418	0.204	1.9551	0.00398	0.403	-0.8967	-0.2289	-0.3849	-0.05522	-0.1454	0.9931	0.1137	-0.3969	1.8324	0.5959	-0.5092	-0.8076	0.9842	0.03783	2.2394	0.203	-0.4227	0.5502	0.833	-0.1561	0.3903	0.4135	0.08926	-1.6256	0.5374	-0.598	-1.2117	0.3192	1.2246
KIAA1033	1.2439	-2.4997	-1.2567	-1.3142	-1.8455	-2.7008	-4.5342	-2.047	-1.0541	-1.9796	-3.9981	-0.3073	-2.0406	-1.5553	-2.4404	0.6509	0.9111	-1.9386	1.0346	-0.5724	-2.8134	-1.692	-1.8044	-1.9264	-0.2496	-3.357	-3.0171	-1.2191	0.307	-0.4249	0.4536	-0.588	-2.1974	-0.4012	-3.2562	-1.6889	-0.638	-1.8807	-1.9831	0.04993	-1.6926	1.2462	-1.713	1.5198	-1.8971	-0.9844	1.2841	-3.5519	-3.4124
PTGS2	-2.3667	1.441	0.9526	-1.764	0.9349	1.749	2.782	0.1943	-0.2809	0.826	2.7622	0.684	1.0642	0.4569	1.403	-1.729	-2.6478	-0.5235	-1.8103	-1.1871	1.6567	0.9004	0.9251	0.8037	-1.0822	2.4342	2.2655	-0.847	-1.9798	-0.9565	-2.7736	-1.8052	1.2788	-1.8149	2.3359	0.7746	-1.0856	1.0757	0.1139	-0.06976	1.0915	-2.9055	0.8569	-1.0965	-1.1519	0.4227	-2.5191	2.1463	2.0716
DNAJB6	1.4256	-0.3397	-1.9405	-3.3837	-1.1787	-0.274	-0.7645	-0.9312	-0.2401	0.6552	-1.058	-1.1996	0.7815	-1.6265	1.3906	2.0967	0.1157	1.9372	0.5446	0.2752	0.3755	1.9152	-3.6528	-0.1789	0.7617	-0.8799	0.5859	-0.7308	-1.0022	1.4912	2.3568	-2.0626	-0.7722	-2.1184	0.411	1.042	-0.09212	-0.6147	0.8034	-0.4741	-0.255	-0.3923	-0.1019	0.347	0.2493	-0.2259	0.3708	-0.1518	-0.1135
PLA2G4A	0.6064	-1.0826	1.0768	0.9004	0.3882	0.03092	1.0559	-0.2682	0.03777	0.7359	0.9183	-0.2893	-0.2009	0.8546	0.393	1.8196	0.7579	1.2341	-0.1743	0.4183	-1.2294	0.8015	0.9909	-0.2753	0.792	0.1113	0.4954	0.6593	0.1393	1.6964	0.7928	0.7912	0.5328	0.4418	0.229	0.7751	0.2703	-0.2344	0.9764	0.05558	-0.4774	0.4967	-0.2798	0.5589	-0.8566	-0.7697	-0.348	-0.6538	0.4952
MAT2A	1.2326	-1.0076	0.1479	0.2399	0.0544	-0.1676	-0.6745	0.2443	-0.9186	-0.5496	0.2266	-0.6429	-0.4292	-1.0852	1.461	0.1029	0.4425	1.0429	0.0124	-0.2331	-1.3267	0.037	0.566	-0.3308	1.6232	-0.8141	-0.1108	0.1202	1.1129	1.7648	0.1733	-0.334	-0.6116	-0.02463	1.078	-0.5171	-0.7383	-1.3481	-0.1697	-0.1363	-0.3092	0.375	0.0246	0.8816	-0.4385	-0.2539	1.9847	-1.5291	-0.5122
TLR4	2.5829	0.3458	4.0485	-0.7752	0.0374	3.2867	-0.6558	-0.4333	1.0429	4.646	3.8666	0.1456	0.0115	1.3659	0.3722	0.164	1.374	2.9594	-0.981	-1.53	0.4999	-0.3033	-0.4472	0.5371	-0.3328	0.2937	0.8801	-0.2239	-0.5963	4.1957	3.0046	-1.2842	0.482	0.4628	-0.7581	-2.5821	-0.2805	0.3646	-0.6591	-0.8566	1.2942	-0.07633	2.9009	1.0725	0.2853	4.6865	-0.6567	1.7324	-1.3149
HMGCS1	-1.2449	0.8652	0.0264	-0.1205	0.0361	0.1332	0.09615	0.1676	-0.003704	-0.1922	0.0594	0	0.06256	-1.7378	0.1937	-1.4138	-1.137	-0.3629	-1.0593	-2.0868	-0.3716	-2.3179	-0.5332	-0.07461	-4.7606	-0.4448	0.04757	-0.03636	-0.7436	-3.0223	-0.7875	0.3558	-0.935	-0.2056	-3.1958	-1.0896	0.06914	0.1246	0.9782	1.0435	0.8672	-0.1871	-0.4895	-3.5581	0.01543	0.1393	0.6138	-2.3949	-0.05485
MBTPS1	1.0668	0.2859	0.4201	-1.125	0.09065	0.1171	-0.4746	0.2437	0.2486	0.7765	-0.4295	0.1824	-0.1292	0.6002	-1.5561	2.0544	-0.4432	1.0057	-0.7065	0.1299	1.3019	-0.8778	-0.8434	0.0007108	0.4048	0.8175	-1.4014	-0.1767	0.4771	-2.5077	-1.1236	0.0796	-0.6132	-1.145	1.1132	0.7037	-0.9965	0.7955	-0.1264	0.49	0.138	-0.04393	0.05443	-0.7258	-0.9671	0.36	-2.2479	3.7353	0.3034
SPRED2	1.7344	0.1078	0.2286	-0.3001	-3.5171	-0.08005	0.1052	-2.2809	-0.7167	0.5515	-0.0875	-5.2442	-2.2032	0.6807	-4.9074	2.3705	0.2481	0.4633	0.9079	-0.3522	-2.634	1.8376	0.6725	-0.876	4.0502	0.3836	0.738	-1.3197	0.1173	2.0368	0.4892	0.07495	0.3759	-2.0375	-3.9247	1.2344	-2.4722	-0.8976	-0.8277	-1.8459	0.2276	-0.1002	-1.1687	5.6587	-0.7368	-4.3888	3.4355	-0.352	-0.06944
ZNF274	-1.5779	0.4175	0.276	-1.1073	-0.6775	-0.07241	-1.1134	0.314	-0.3054	0.0363	-1.7093	2.1294	1.1627	0.6602	2.1732	1.4274	-0.4555	0.7498	0.1695	-0.008268	1.4905	-0.3773	-0.0947	0.3216	-0.4855	0.155	-0.3988	-0.09998	0.2223	-1.8537	-0.4784	-0.6232	0.7578	0.789	1.722	-1.4045	0.5713	0.9327	-0.04461	0.7675	0.4373	-0.3918	-0.07146	-0.565	-0.3564	1.9437	0.9064	-0.5828	-0.2054
CLIC4	1.2988	-1.1886	-0.3339	-2.01	-0.8346	0.3917	-0.2704	0.3662	-0.1485	0.7798	-0.8346	-0.6637	0.3538	1.3023	1.2334	-3.6497	-0.4965	0.7446	0.6843	-0.695	0.4991	1.8675	0.818	0.3113	2.1187	-0.9547	1.3865	-0.6048	-1.1244	2.9307	0.7513	-0.5659	-1.2898	-0.1828	0.07662	-2.8062	-0.118	-0.07723	-0.2561	0.2132	-1.4005	-0.2534	-0.9968	0.123	-0.3185	0.7787	2.1012	-0.4037	0.1467
MAP7	0.6555	-0.4233	-4.1175	-0.6496	-5.1252	3.0556	-0.2587	-2.8337	-0.162	0.1028	-0.2048	0.2605	0.8811	-2.97	0	-1.9133	-3.2898	-6.809	-6.71	-2.725	0.2009	-0.01215	-5.3372	-1.2401	-3.8977	-6.3365	-2.7769	-0.3505	-6.9643	-6.3838	0.3142	-0.2856	4.3346	0.1126	-2.3253	2.8046	0.7708	-0.1327	0.5588	-3.3409	5.1852	0.1203	-3.6616	4.1351	-3.5389	-2.3617	-0.05588	0.6924	-3.437
CHAC1	5.463	0.6729	-0.06549	0.19	-0.0567	0.4949	1.0547	-0.3244	-0.1817	0.353	0.3769	-0.7129	0.3604	0.569	0.01915	1.9363	2.1156	1.1381	0.6594	0.486	-0.0462	0.4998	1.6372	-0.1898	-0.6367	0.6564	0.452	0.9693	0.672	1.4439	0.5426	0.1412	0.1443	0.1101	-0.4924	2.2182	0.6076	0.8544	0.7799	0.2141	-0.6553	0.1399	0.3264	-0.6812	1.8232	-0.5206	0.09278	0.4363	-0.1873
EIF4G1	-0.8821	-1.3846	-0.3238	-0.3483	-0.6285	-0.7543	-0.05045	0.1501	-0.05642	0.2167	0.0515	-0.2215	-0.7731	-1.5308	-0.5877	-0.05319	-1.8581	-0.6804	-0.4268	-0.2828	0.835	0.505	-0.7243	0.06977	-1.1524	-0.5844	0.2331	-0.7656	-1.4281	-1.6222	-1.2721	-0.3939	-1.5119	0.2555	1.3879	-1.673	-0.6814	-1.0124	-0.7585	-2.2915	-1.3144	-0.1084	0.05007	-0.4745	0.2739	-0.3248	-0.6236	0.4276	-0.6783
BTK	-0.6756	0.5083	-0.5572	-0.8403	-0.4338	-1.4124	0.4533	0.1917	0.06453	0.2385	1.1938	-2.7502	-1.6551	0.7143	0.5394	2.9409	-1.3636	-1.3614	-0.2764	-0.5959	-1.1748	0.0685	1.2591	-0.01483	-1.6225	-0.7597	0.4531	0.514	0.2549	1.3699	1.1612	-0.7605	0.2477	0.1668	-0.5259	-0.3128	-0.9291	0.4512	-0.009408	1.3292	0.4072	0.6465	0.6952	-0.8898	1.4287	0.4933	0.254	-1.426	-0.06393
GNAS	-0.04525	0.304	0.5953	0.224	-0.5611	0.1789	0.304	0.5412	0.6021	0.304	0.5992	1.1224	-0.2257	-3.003	0.5992	-3.0283	0.8333	-1.0846	-1.199	0.57	0.2614	-1.691	-4.696	-0.1405	-1.2103	-0.4222	-0.6514	0.3127	0.149	-1.4033	0.4245	0.9453	-0.8643	-0.3388	-0.6402	-0.8593	0.3691	0.006701	0.5553	-3.1995	-0.3372	-0.2356	-0.09488	-1.578	0.01152	-0.04516	-1.2822	-1.1993	-0.3882
MYL9	0.3301	0.09195	-0.1795	-1.0039	-0.1347	-0.1902	-0.5469	0.007389	0.1128	-0.3451	-0.2623	-1.4401	-0.6921	0.5153	-3.3835	-2.446	0.3529	-0.5267	-4.0185	0.4164	0.2506	-1.7362	-0.08115	-0.445	-8.8923	-0.66	0.09783	-0.3459	-1.7578	-4.1804	-1.5528	0.7444	-0.6203	0.1763	0.7607	-5.6142	0.239	0.4193	0.6065	-0.3114	-0.5019	-0.443	0.02565	-8.6031	0.7448	0.1243	-5.1104	0.1736	0.4573
TEX10	0.4557	-0.2196	0.04234	-0.3988	-0.2706	0.2341	-0.8184	0.6181	-0.8493	0.7634	-0.7744	-0.1955	-0.6415	0.4435	1.068	-1.8755	0.6217	0.8254	-0.4035	-0.257	-1.686	0.5388	-0.1868	-0.03899	-0.1922	-0.8564	0.4288	0.05484	-0.3088	0.4158	0.7908	-0.5337	0.2306	-0.8565	0.7739	0.9187	-0.4885	-1.1729	-1.8019	-0.8233	0.3764	1.4214	0.9061	0.3149	0.5186	-0.9775	1.7539	-0.3241	-0.883
PSMD2	-0.7917	-0.8663	-0.4414	0.5523	0.1736	-0.4004	0.118	0.5715	-0.6032	-0.4941	0.5893	-0.5245	-0.7564	1.1002	0.3145	-1.2046	-0.2834	0.5811	0.6181	0.3808	-0.2261	3.9872	-0.5197	1.1609	1.8054	-0.5318	1.055	-0.612	-1.9009	1.8207	2.3762	-0.2638	0.3729	-0.2856	-0.6502	3.3666	-0.4119	-1.0171	-1.2559	-0.647	-0.6112	1.2554	0.3546	-0.206	0.742	-0.7011	1.2136	-1.081	-0.5573
ZNF586	-1.4671	0.6941	-0.4334	-0.2802	0.0782	0.5406	-0.6409	-1.4091	0.2522	-0.3995	-0.5367	0.2647	0.06767	2.5498	-0.471	3.5746	0.2266	0.4954	-0.6199	3.1532	1.1681	1.7163	1.0364	-0.1956	-1.3535	-0.6675	3.8684	-1.4599	-0.6655	0.3813	0.4089	0.1628	-0.0204	0.124	-1.4689	-0.2329	0.006214	0.305	3.2673	2.7761	-1.0751	0.235	0.2297	-0.7471	0.5835	-0.7115	-0.478	0.3596	0.2498
CLTC	-0.32	1.0597	0.7306	0.6443	0.0403	1.4936	0.9209	0.6129	0.6777	0.00325	0.4971	0.7493	1.5886	0.1397	-0.04145	-3.8869	0.6632	-0.5646	-0.969	0.1313	0.02455	-0.4469	0.3517	1.788	-0.3497	-0.1646	-0.1021	0.4509	-0.3423	-0.5445	-0.4313	-0.1589	0.2148	1.3131	-0.8335	-1.3926	0.05966	0.5104	-0.6794	-0.04281	0.5063	-0.7008	-0.3351	-0.4708	0.1972	0.4429	1.6223	0.02589	0.1934
IKZF1	3.223	0.4979	-0.4523	4.7252	-0.5642	3.1329	5.1614	0.506	2.9403	-0.5022	-0.8016	-0.5723	9.7548	6.0923	0.4124	3.0737	0.468	0.1358	0.2024	-0.3984	0.3901	0.2461	5.0256	4.2395	0.1099	4.2533	-0.3817	3.5311	2.949	-0.01635	3.372	0.04573	0.7772	6.7517	-0.2781	-0.05263	0.2277	1.8559	-0.1924	0.5926	1.3785	-0.4222	-0.7586	6.1993	-0.1789	6.4303	5.7361	10	3.0166
APBB2	0.2437	-0.9079	-1.0861	-0.5173	-0.3424	-1.2692	-0.2699	-0.04171	-0.3583	-0.1965	0.047	-0.7308	-0.6444	-0.6129	1.1373	3.6164	-0.2101	0.8704	0.748	0.1698	-1.0443	0.8723	0.6208	-0.193	2.516	-0.2298	0.8141	0.1788	0.3175	2.2653	0.2594	-0.172	3.9811	0.2458	1.9555	0.7562	-0.2925	0.05919	1.5831	-0.08191	-1.4003	0.6099	-0.1678	4.0906	-0.371	-0.08431	0.605	1.6566	-0.341
HSD17B10	-0.546	0.3296	-0.1663	-0.1549	1.1328	0.1601	0.96	0.5322	0.6693	-1.1539	0.2884	1.4585	0.7879	-0.2107	-0.3188	-2.9343	-0.125	-2.2219	-1.2951	0.4262	0.7918	-1.0005	0.0119	0.2469	-1.8292	0.2899	-0.3762	0.4529	-0.09644	-1.2833	0.6147	0.2623	1.3078	-0.4354	-1.5906	0.8821	1.1307	0.8075	1.2127	0.8729	1.2004	0.1231	-0.2393	-2.7467	0.4203	-0.7377	-3.0566	0.482	0.8773
RNF167	0.625	-5.0814	-7.746	0.2558	-4.9068	0.1006	-0.2664	-0.2195	-1.4365	0.03395	1.2515	0.4731	-0.1969	1.9423	0.4329	0.0493	0.3544	0.8052	0.06769	0.836	-0.3656	-1.5747	-0.3022	0.8672	0.4041	-4.6124	-1.1662	-0.05736	1.6654	-1.1506	0.9497	0.4965	0.6031	-0.2304	-7.5489	-2.8281	-0.5709	-0.02642	0.1277	-0.4903	-0.6734	-0.262	0.4624	-0.8274	0.05241	-0.6681	-0.6364	-0.6016	-1.9392
STX1A	0.3167	0.2603	2.0872	0.7894	0.1278	-0.01389	0.193	0.313	0.349	-0.0701	-0.1865	-0.6306	0.2009	0.003111	2.6378	-0.1906	1.0742	0.3625	4.1999	-0.3908	-2.2222	3.2477	0.3979	-0.4999	6.227	0.849	0.3626	-0.01235	0.7779	2.6383	-0.3833	-0.7596	-0.1463	0.00847	0.7713	3.6863	-0.4467	-0.1594	-1.4426	0.1999	-0.3307	0.08117	0.1363	9.0773	0.3406	-0.7633	6.6813	0.08639	-1.2608
ALDOA	-1.2276	0.4733	0.4894	0.1966	-0.03	0.1615	-0.2349	0.0261	0.1075	-0.6098	0.00395	0.9503	0.2705	0.332	-1.0101	-3.405	0.3054	-2.5628	-0.7168	0.449	0.6949	-0.4857	-0.68	0.4983	-0.8638	0.4938	-0.5427	0.6066	-0.1134	-2.61	-0.9778	0.2423	-0.2107	0.1318	-1.3081	-0.7677	0.5927	0.631	-0.0207	-0.1819	-0.3002	-0.9678	-0.3877	-0.8382	0.734	0.7654	-0.9643	0.8014	0.751
EPHA3	-1.08	10	4.403	-0.3714	-0.352	3.4897	-0.3415	-0.351	1.5254	0.2027	-0.2398	-0.3242	-1.1685	-0.2006	4.831	3.0599	-0.6688	-0.6588	5.9135	0.00206	4.8787	-1.1198	5.0543	1.4571	5.3736	-0.09868	-0.7471	0.1309	0.7624	0.09723	-0.3636	-0.05295	5.2186	-0.799	3.0663	-1.0133	-0.3531	1.4697	4.4247	-0.008229	5.1248	-0.1148	-0.6158	2.7744	-0.8219	2.1388	3.7939	2.4982	4.2213
STAT5B	0.04099	-0.517	0.02612	-0.09375	-0.4728	-1.8389	-0.799	0.004749	0.0237	-0.6745	0.09075	0.2473	0.5079	-1.6456	-1.1593	-0.8032	0.3782	-0.08527	-0.2299	0.4681	-0.5591	-0.4563	-0.2427	0.2345	-2.0274	-0.8767	-0.136	-0.4199	-2.2029	-1.1189	-0.8165	-0.561	-0.9834	0.1507	0.7942	0.8619	0.5819	0.4291	-0.2959	0.3064	-0.8062	-0.4866	-0.08295	-1.5019	-0.2252	-0.1333	-0.7973	0.2941	-0.1902
TXNDC9	0.759	0.1889	-0.1321	-0.7154	0.205	-3.0932	-0.6147	-0.5	-0.4581	0.1312	-0.8558	0.1989	0.4173	-0.5598	0.5803	0.8713	-0.1528	-0.3767	0.5373	-1.3157	-0.5804	-0.6769	-0.2938	0.4076	0.5417	0.6558	-0.3258	-0.07602	-0.659	0.008238	-0.7445	0.4398	0.3035	-0.4414	-1.2543	-1.3486	0.2704	-0.1422	-1.9446	1.2745	1.6694	-0.05546	-0.1204	0.9288	-0.2131	-0.7382	1.1789	0.4024	0.8019
CCNA2	-0.2648	0.7771	0.7823	1.163	-0.3389	0.5216	-0.3761	0.6169	0.7757	-0.2377	1.2608	-0.1204	1.2666	-6.0119	-1.3858	-3.1392	-0.5327	-3.5757	-5.9316	0.6155	-5.0875	-2.6532	-0.5957	0.4312	-4.1852	0.1288	-0.09208	-0.1889	-0.7801	-3.8551	-2.9011	0.9766	0.1403	0.1367	-2.3304	-0.2044	0.4428	0.5515	0.3711	0.8767	0.3747	-0.8101	0.4822	-9.3793	-0.04285	-0.3538	-3.1294	0.3859	0.0896
VGLL4	-0.01581	0.04945	-0.6325	-0.02115	-1.5026	2.1352	-0.9424	1.9344	-0.8607	-0.3516	-0.28	-0.3852	-0.7629	3.5538	-0.3304	-2.0992	0.09772	1.931	0.6154	-0.843	4.5077	-0.05035	-0.1732	1.0557	1.9356	-0.1342	1.0915	-0.5707	1.7044	0.7008	1.7523	0.004249	-1.0114	1.6189	-0.8009	2.2784	-0.5725	-0.2398	-1.2649	4.0553	0.7444	-0.8867	0.1846	5.5767	-0.4855	0.8976	1.4431	0.2829	-0.6797
CASP10	3.1596	-0.2755	-0.2978	3.2938	2.762	1.9244	0.04935	2.0225	0.9244	0.1006	3.2929	7.4755	-0.6378	1.9376	-0.1551	2.2317	0.0375	3.5859	4.9099	2.0805	0.03435	0.6603	0.00525	1.1144	0.4965	3.7293	-0.1263	0.243	2.4225	5.2929	0.3288	-0.1859	3.9067	0.145	0.2148	0.4861	-0.1536	2.7549	0.4608	0.3179	2.5815	-0.02908	-0.4788	-0.3896	-0.5308	-0.5685	3.3852	1.2938	1.9893
SDHB	-0.2566	0.3748	-0.02727	0.033	0.3799	-0.8124	-0.5433	0.6127	-0.003506	0.3737	-0.2193	-1.2773	0.3761	-0.8539	1.578	-3.3092	0.883	0.01734	-0.8251	0.2388	-1.3786	0.5026	0.04535	-0.6886	-1.025	0.06459	0.4883	-1.4114	-0.0144	0.3034	-0.6909	0.6158	0.561	-0.8367	-0.2685	2.2857	-0.3968	-0.2021	-0.478	0.07971	0.3722	1.1718	0.12	-0.9306	0.3201	-0.6257	1.6362	-1.132	0.146
ETS1	1.465	-0.3729	-1.5714	0.2685	0.2367	-0.2591	0.7814	0.4038	-0.4665	-0.3447	-1.1707	-0.9268	0.1848	-0.9788	0.178	1.9482	-0.01469	0.1128	1.0597	-0.2253	-0.09335	1.9037	-0.03965	-0.9632	-3.2849	-0.2525	1.2969	0.1152	-2.1183	0.807	0.4174	-0.3738	-3.4597	0.6621	-0.05405	-0.005154	-0.2884	0.08223	-1.1963	-1.218	-1.7424	0.3404	0.4992	-5.5473	1.9443	0.5127	1.9281	-0.5492	-0.9201
YTHDF1	0.212	0.0218	1.6534	0.6955	1.0376	1.073	-0.1165	-0.3535	1.043	-0.1739	3.0638	0.1713	1.2314	4.1434	-0.1865	-1.6832	0.4856	-0.6108	-0.3299	0.3212	-1.005	0.00015	2.8266	0.7807	1.1036	1.7314	-0.3935	-0.8896	-1.0333	-2.0834	-0.2295	-0.6149	2.6788	0.4484	3.5685	2.8878	1.8856	0.3125	1.2527	0.4519	0.3681	-0.1188	0.06094	2.7198	1.9413	-0.2799	-0.8661	1.5564	-0.8527
FOXO4	-0.8295	1.1884	-0.2893	-0.3809	0.0492	0.6673	0.9726	-0.8147	1.0361	0.1426	-0.7294	0.2034	0.1277	2.4904	-0.982	1.1985	-0.4418	-0.4055	-0.0577	-1.1328	2.7789	0.8938	-1.1724	0.2139	0.2403	0.7353	-0.955	-1.0092	-1.2159	-0.709	0.8497	0.07141	-0.3331	0.07082	-0.7072	3.0898	-1.4964	0.5466	-1.6539	-0.4677	-2.1025	-0.5727	-0.007055	-0.2265	0.6513	0.1653	-1.2776	0.6805	0.02046
LSM5	0.785	0.2576	-0.1532	-0.1054	0.2925	-0.6385	-1.6267	-0.1867	-2.2076	0.1907	-0.04475	0.41	-0.1735	-4.7364	0.834	-3.1359	0.532	-3.1214	-0.9888	-0.8657	-1.1363	0.4252	-0.07555	-0.3424	0.8599	-3.0135	-3.2106	-0.9539	-0.2575	0.6648	0.6082	0.2046	-0.2186	-0.1133	-0.3418	-0.389	-0.1966	-0.7098	0.01575	0.2403	0.5118	0.002143	1.0125	-1.165	-0.2119	-0.3641	0.6552	-1.3723	-3.5715
TOMM34	0.2633	0.1605	0.172	0.4121	0.449	-0.5111	-0.0468	0.3006	-0.1156	-0.2559	-0.3008	0.3299	0.09401	0.3202	-0.1124	-2.0898	-0.7403	-0.6743	0.396	-0.1143	-0.09875	2.3558	-0.1486	-1.0534	2.6012	0.2852	0.8114	0.5035	-0.928	0.7279	1.115	-0.1648	0.9958	-0.6018	-0.5873	0.1058	-0.1258	0.317	-0.5548	-0.8542	-0.2538	0.2935	0.1453	3.9171	-0.1549	-0.7868	2.8975	0.1786	-0.3288
ZMYM2	-1.3993	-0.1746	-0.2233	0.2806	-0.6653	-0.1909	-0.8375	-0.1054	0.4228	1.3084	-0.4684	0.0438	-0.2675	-0.9504	-0.8364	-0.9067	2.609	-0.05647	-1.8974	-0.554	-0.9733	-2.2723	-0.5562	0.7624	-1.5624	0.4852	-1.0333	-0.341	0.8355	-1.4638	-0.7104	0.7404	-0.03694	1.9876	-0.6729	0.2586	0.1923	0.1298	1.1992	1.2983	-0.3436	-0.3405	0.2911	0.06804	0.6252	1.4047	-1.7231	0.9895	0.2906
CHMP6	1.1278	0.2929	-1.0681	-0.4088	-0.6307	5.5076	-1.0519	-0.1045	0.4638	-0.6263	-0.7002	6.8822	-1.654	3.8751	-0.9794	-0.019	-1.224	2.743	0.0426	-0.306	7.1196	-0.8965	-0.9338	0.03878	-0.9061	1.8987	-0.4258	-1.111	0.7122	-0.4365	-0.2877	1.9147	3.5666	0.2173	1.2434	2.6337	2.6982	-0.09045	3.9193	1.1573	-0.7791	-0.1515	0.5689	-0.415	2.4171	-0.6787	-1.8481	0.4587	-0.2187
KIAA0907	-0.9598	-0.7293	0.04148	1.7682	-0.1892	-0.6704	-1.2143	0.6003	-1.0922	-0.364	-0.00585	1.7966	-1.3484	0.8817	-0.6192	0.03873	0.5145	-0.1272	-1.3145	0.03904	-2.204	1.4626	-0.5303	0.1203	-0.254	-0.425	0.4265	-0.3572	-0.9963	-1.1135	1.6093	-0.7701	-0.6442	-0.6528	2.9139	0.04248	-3.6453	-0.7633	-0.4743	-1.2477	0.4389	0.5086	1.1399	-0.7438	0.3854	-0.6042	-0.5285	-0.2033	-0.7087
CASP7	-1.2056	-0.04575	-0.5993	-1.1375	-0.2675	-0.8738	-0.4598	-0.5818	-0.5107	-0.6265	-1.7187	-0.8195	-0.8621	-0.3432	0.2523	-2.1971	-0.1621	0.03983	-0.2151	-0.5961	0.1296	-1.0453	-0.1161	-0.2342	-1.4296	-0.21	-0.6286	-0.7594	0.8091	-1.1464	-0.9286	-0.197	-0.03814	-0.2517	-0.6412	-0.4244	-1.0278	-0.008263	-0.8235	-0.1409	0.6758	0.637	-0.3918	-0.8691	-0.7627	-0.000468	-1.3352	-0.4701	-0.7254
HK1	0.3572	0.7123	0.2587	0.7978	0.605	1.1311	0.7209	0.6274	0.3595	-0.00675	0.3658	1.1852	1.1244	0.3303	-1.006	-3.6481	-0.6419	-1.6778	2.2705	0.6592	1.747	1.4304	-0.9833	0.1892	0.5562	0.8594	1.3642	0.03351	-1.0352	-0.3021	-0.1882	-0.07417	-0.1399	0.3842	0.09786	-0.4285	1.0369	0.4142	-0.5422	0.2214	-0.3087	-0.5917	0.4501	1.2025	1.0665	1.2881	1.5863	1.6045	1.0317
PAPD7	-0.7654	-0.6242	-0.4391	-0.1145	0.1026	0.2061	1.0561	0.3008	-0.01425	1.0641	1.1834	-0.0561	0.3403	0.9248	0.5908	1.6967	1.0199	1.0251	0.4312	0.6347	0.2228	1.0453	0.5557	-0.1639	-0.2804	0.4317	0.6222	1.1926	0.7717	1.1702	0.7655	-0.08744	-0.1017	-0.6381	-0.005647	-0.1545	0.2697	-0.3202	0.9059	0.5104	-0.8124	-0.09464	-0.6502	-0.1506	-0.595	0.2744	-0.1581	0.3699	0.8214
PIGB	0.9963	-0.0359	0.2247	0.2906	-0.4237	0.3484	-1.1455	0.06029	-0.3435	-0.018	-0.4207	-1.4025	-0.4517	-0.895	0.5602	0.1465	-0.2543	0.8398	-0.5844	-0.1666	-0.5879	-0.5979	0.2183	-0.02144	3.3574	-0.8848	0.1979	-0.6182	0.8102	0.7474	0.9517	0.5552	-0.6752	1.895	2.1669	-0.3636	-0.6018	-0.3671	0.08979	0.6247	1.0559	0.4838	0.5968	0.733	-0.06439	-0.3107	0.1184	-0.6241	-0.7101
CHEK2	-0.533	0.1473	-0.8	-2.2301	0.06955	-0.6369	-0.9521	0.03261	-0.211	0.0554	0.1339	-1.0468	0.9145	-0.6467	-0.7588	-3.422	-1.1397	2.2466	-3.5558	-0.3117	0.117	-4.4194	-0.6074	0.07659	-1.6368	0.4923	-1.5939	3.6894	2.1032	-2.7767	-2.1695	0.03718	-0.3519	0.09743	0.4559	-2.1775	1.1501	0.7909	-0.7453	0.3088	0.401	-0.048	2.0624	-0.679	-0.6417	-0.8865	-3.3813	-0.3497	0.0936
PLOD3	0.1784	-0.9744	-0.7628	-0.5553	-0.1385	-0.152	1.0699	-0.03921	-0.6444	-0.1908	-0.5944	-1.1543	-0.7037	0.3956	-1.1085	-0.1288	-0.1794	0.2907	1.811	0.3916	1.6535	0.7757	0.0329	-0.9375	0.1931	1.0715	0.6343	0.03978	-0.2575	-0.07122	-2.4328	-0.436	-0.1142	0.5036	0.4014	1.5084	-0.1408	0.1459	0.1282	-0.9053	-0.71	-0.4489	0.03753	-1.1899	0.8264	0.7557	0.7652	0.6538	-2.2719
ACD	-0.4653	-0.7173	-0.3191	-1.1158	-0.8184	-0.8383	0.7908	-1.1279	-0.5482	-1.2996	0.6758	-0.6745	0.3553	-0.03236	-1.4578	1.6547	0.7344	0.2201	-0.6573	-0.1515	1.3861	-0.1762	0.4999	-0.5624	0.482	0.6068	-0.6738	0.3523	-1.0548	1.1301	0.8491	-0.03595	0.7063	-0.7629	0.294	-1.1147	-0.5108	-0.2623	0.5827	-0.2417	-0.9836	0.5731	-0.9298	0.02132	0.3328	-0.3741	-2.4342	-0.4445	0.581
TRAK2	0.4898	0.5403	1.0536	1.1256	0.2722	0.1885	-0.8751	1.4949	0.5757	0.06835	-0.1617	1.134	-0.3539	0.5223	-0.3582	0.8306	0.5704	-0.5903	0.4693	0.6521	-1.4886	0.825	-0.4679	0.1922	0.08999	-1.3647	0.433	-0.3728	-0.05216	-0.174	0.1148	-0.4769	-1.1305	0.585	-0.8345	0.01383	0.1369	0.384	-0.1359	0.5862	-0.1655	-0.8503	0.4378	0.3131	-0.2161	-0.1785	0.5963	0.3741	-0.1899
SUPV3L1	0.452	-0.4304	-0.509	0.3171	0.2601	0.2043	1.297	-0.0991	-0.4039	0.6283	1.2376	-0.679	0.08665	0.8005	0.6708	1.3283	0.5142	0.361	0.1887	0.6089	0.2858	1.1099	0.456	0.04497	0.4757	-1.384	0.1919	1.375	0.1714	1.3072	1.485	0.687	-0.231	0.5636	-0.8008	1.283	0.08016	-0.1157	0.9661	0.5962	-1.3483	0.4294	-0.384	-0.2031	0.1747	-0.2786	-0.244	0.06142	0.2697
VAPB	-1.8533	-0.5738	0.0003447	0.1785	-0.9807	0.0108	-1.7928	-0.04085	-0.4577	-0.8665	-1.0122	0	-0.857	0.9172	-0.9327	-1.5736	0.06842	-0.8619	-0.1803	-0.1961	-2.231	-0.9039	-0.4263	0.8023	-0.8422	-0.09291	0.2658	-0.46	-0.8955	-2.0494	-1.9718	-0.1535	-0.5834	-1.1929	1.6118	-0.2328	0.3672	-0.1278	0.02466	-0.8353	1.2673	-0.3083	-0.05912	-0.6988	-0.1497	0.2501	-1.0924	-0.4322	-0.09087
GPATCH8	0.1511	-0.131	-0.2596	0.6027	-0.3258	0.01917	-1.1199	-0.1416	0.05158	4.5392	-0.04165	-2.2488	3.4248	2.9507	4.969	-1.7719	0.6602	3.4723	6.2126	-0.2634	4.8983	-1.5883	0.9028	1.258	3.2522	-0.1999	-0.5197	-0.9069	2.787	-0.2193	-0.719	-0.8159	-0.7582	3.9309	0.3814	-1.0173	-0.9013	-0.39	-1.1388	-0.9023	-0.4096	-0.8374	-0.4319	-0.4088	0.1031	-0.638	3.8971	-0.3259	-0.3569
HSPD1	0.2172	-0.5601	0.036	1.5044	-0.3571	-0.3692	-1.0598	-0.3389	-0.5307	-0.1898	-1.6532	-1.0746	0.2654	-0.948	-0.2479	-3.9669	0.9309	-2.1009	-2.1426	-0.3613	-4.7745	-0.5081	-1.0668	0.07996	-2.779	0.06552	-0.2579	-1.145	-2.6237	-0.8889	-1.101	-0.2875	-0.2708	0.3786	-0.9854	0.3556	-0.1831	-0.1037	-1.5751	-1.2301	0.289	0.03594	0.1685	-3.3631	0.1214	-0.3506	0.8567	-0.1155	-0.8281
BUB1B	0.2369	-0.2318	-0.2204	0.6727	0.5366	0.05598	1.4684	0.7649	0.356	0.6574	-0.1597	-0.6337	0.613	-3.2146	-4.1397	3.7736	1.4829	0.3271	-2.7742	1.128	-1.5131	0.7212	0.6999	0.1982	-1.1181	-2.8508	0.1567	-0.2404	-1.5224	1.3351	0.9027	0.2765	-0.273	-0.2131	-0.8048	-0.3364	0.7321	-0.138	1.3748	0.1623	-0.1957	0.3025	-0.04838	-0.06262	0.07873	-0.1334	2.5743	-0.9655	0.4741
TGFBR2	0.9124	-0.4871	-0.5863	0.1246	-0.5785	-0.5846	1.0723	-0.522	-0.6913	-0.7749	-0.7586	-0.1233	-1.0047	0.4662	2.0822	0.05364	-0.6549	0.00959	1.3949	-0.2125	-0.6222	1.1812	0.6741	-0.1506	4.0684	0.642	0.1251	-0.2658	1.1997	1.9486	-0.7047	-0.4375	-1.4689	0.428	1.1762	2.4823	-0.6351	-0.3964	-1.3156	-0.5435	-0.6016	-0.02106	0.4206	3.0006	-0.01203	-0.3468	2.7987	-0.3329	-0.5468
MRPL12	0.5206	0.2632	0.3397	1.0355	0.7953	0.2676	0.4049	1.0358	0.3269	-0.4691	0.7125	-1.2917	1.3132	-2.1878	0.7196	0.1979	1.1235	-0.9152	-0.5546	0.9244	-1.7435	1.1657	0.4964	0.5921	-0.8199	0.4172	0.01928	-0.2986	-1.06	1.1744	0.4544	0.114	0.8404	0.7533	0.8248	1.6144	-0.06513	0.4708	-1.1418	-0.04981	0.2012	-0.2071	-0.1254	-2.9717	1.1074	-0.7315	0.2312	1.3345	-0.1763
NOTCH1	0.442	-0.0755	0.6243	-0.9993	0.3708	0.5392	1.0576	-0.2165	-0.05009	0.8551	0.935	1.2294	-0.2638	1.7318	1.4026	2.6664	0.817	1.4024	0.7638	0.2976	5.5459	2.1688	0.2446	-0.432	1.7484	-0.02344	0.3858	0.8295	0.6635	1.6946	0.6884	0.1965	0.6905	0.4251	4.5216	1.1908	2.5926	-0.1948	1.4179	5.5158	-0.3884	0.5615	-0.5053	0.6996	0.1873	-0.3016	0.03736	0.07202	0.4646
PNP	0.4344	0.1296	-0.1663	-0.03495	0.6435	-0.409	0.0145	-0.3174	-0.7698	-0.2213	-1.256	0.2267	-0.3162	-0.7245	1.1163	0.4597	-0.06596	0.09415	4.2546	-0.4714	0.0586	3.4402	-0.1573	-0.6991	3.2449	0.6833	1.9739	-0.1035	-1.1401	1.8201	0.3631	0.04682	-2.8645	0.03834	-0.35	-0.5318	-0.1124	-0.7794	-2.2703	-0.2566	0.8148	0.8364	0.4092	5.3366	-0.7142	-1.0051	3.4326	0.8419	-1.4153
SHC1	0.06235	-1.3677	-0.7964	-0.392	0.1009	-0.6491	-0.0071	0.1677	0.08051	-0.0305	-1.0026	-1.0637	-0.9992	3.4542	-0.2322	-3.4612	-1.1733	-0.2757	0.3155	-0.3271	0.394	0.7477	3.055	0.9539	1.0058	-0.6281	0.5619	-0.722	-0.4168	0.5199	-0.8712	-0.791	1.633	-0.4015	2.0791	2.2209	-0.8964	-0.4648	1.1845	-0.9996	-1.2411	0.4326	-0.6347	1.1408	0.1703	-0.5178	2.1638	0.2794	-0.4405
ARPP19	-0.342	-0.5712	0.8883	0.9796	-0.4726	0.2437	1.1609	1.04	0.447	-0.51	1.2258	1.676	-0.2251	0.4947	1.3463	0.5107	-0.8586	0.8007	-0.1237	0.5584	5.7348	2.3278	-0.4878	1.1598	-0.3447	0.07288	-0.2461	0.6352	0.121	-0.03325	0.0538	0.9429	0.362	0.5703	1.6728	-0.3873	0.1776	0.9801	-0.2727	-0.01868	-0.2013	1.2385	1.6405	0.2902	1.1477	0.4448	1.2078	-0.1216	0.8664
CEBPA	0.0129	0.3552	-5.5006	-1.3713	0.3146	-0.07493	-4.523	-4.5704	-0.581	0.4171	-4.4065	0.2885	0.146	-0.888	-3.7426	-2.4879	0.3863	-3.0016	0.6456	-1.682	-3.766	-6.7657	0.1653	-3.5159	-1.4337	0.1977	0.9604	-1.3607	-1.7419	-0.9927	-0.2487	-6.5545	-0.7217	-1.2989	-3.5825	0.2702	0.1746	-2.3538	0.09973	-0.2947	0.4692	-3.2143	-4.5971	-2.659	-4.3794	-2.1046	-1.4564	2.0112	-3.1119
PSMF1	0.4723	0.0381	0.8805	0.285	0.0239	2.0028	1.6774	0.5907	1.048	0.4859	1.0308	1.082	0.7454	1.3969	-0.2363	2.7423	0.7968	0.0577	0.688	0.8727	-0.3128	0.9274	-0.3685	0.07867	0.3044	0.7208	0.3476	1.4689	0.08773	0.2675	1.1146	-0.2044	1.4383	1.7276	0.6128	0.5973	0.5428	0.6898	1.3041	0.2855	1.0788	-0.1481	0.1359	-0.53	-0.2666	-0.5967	0.3882	0.2033	0.4223
RTN2	0.1476	-0.5179	0.8134	-0.02535	0.2803	-0.6367	1.3758	-0.01566	0.004847	0.6947	0.7543	-0.516	0.07356	0.8063	0.8138	1.6815	0.561	1.2585	0.475	0.5155	0.5868	1.2215	0.6385	-0.2092	1.1503	0.2482	0.2113	0.6076	-0.1565	1.9717	1.2629	0.3561	-0.09781	-0.6046	-0.9847	0.4212	-0.03694	-0.339	0.9477	-0.2802	-1.8109	-1.1643	-1.7191	-0.0711	-1.3022	0.2986	-0.3631	-0.1577	0.649
NPEPL1	-0.8139	-1.3824	-0.9878	-1.1802	0.0805	-1.0142	0.3053	-0.7344	-0.1544	-0.6504	-0.4007	-0.3569	-0.9705	1.5077	0.0664	3.3639	-0.4774	0.6469	3.4906	-0.6381	0.1503	2.2354	-0.5922	-0.1416	1.5533	-0.3513	0.1668	0.2558	-0.07188	0.2218	-1.2118	-0.6144	0.4841	-0.08991	2.3332	1.4159	-0.7228	-0.6457	-0.2576	0.9596	-1.0497	-0.4765	0.4779	1.8624	-1.3394	-0.2472	0.775	0.7686	-0.1809
USP1	-0.3719	0.8253	1.1273	0.4977	-0.2129	0.3155	-1.646	-0.2785	-0.2277	0.0243	0.9735	-0.4428	-0.08714	0.372	0.4819	-3.743	0.2582	-0.1238	-5.1235	-0.6541	-0.6777	-4.7552	-0.2047	0.2965	-0.02581	-0.2561	-0.9038	-0.4944	0.8355	-1.6584	-0.2349	-0.09996	-0.2121	-0.8307	-1.1521	-0.4396	-0.5893	-0.2972	-0.3361	0.686	0.2843	0.1194	0.6688	-2.9388	-1.3358	-0.5163	-4.0731	-0.8846	-0.7945
RPA1	-0.5124	-0.3242	-0.773	-0.3395	-0.1304	0.1399	-0.325	0.04239	0.509	0.195	-0.2121	-1.0157	-0.6571	3.2551	-0.4945	-3.4019	0.01571	0.1052	-0.9407	-0.05542	-1.0952	-2.3434	0.4365	0.3719	-1.0637	-0.917	-1.1762	-1.2073	0.4618	-0.6397	-0.5133	0.2927	-1.7491	-0.06055	0.3665	0.58	-0.1501	0.0564	-1.0214	0.8327	-0.4294	-0.1144	0.6113	-1.9021	-0.04952	0.4498	-1.4842	-1.0772	-0.2135
SIRT3	0.5387	-0.405	-0.4039	0.05565	0.6888	0.3113	1.8171	-0.6192	0.9221	0.5889	1.3146	0.5077	1.4642	-0.3556	0.2369	3.4713	0.9345	-0.2588	3.101	0.1795	0.304	1.1326	1.9971	0.9068	2.2143	-0.03383	-0.6328	0.7002	-0.4525	0.2831	3.3944	4.309	5.6009	0.172	0.3002	0.5382	0.4118	0.8096	0.5243	-0.9792	-0.2872	-0.5419	-0.1639	0.3357	-0.5471	-1.4309	-0.1773	2.6263	-0.1542
KLHDC2	0.4819	1.2526	-0.1655	0.5229	-0.5303	-0.3838	-0.5704	0.4035	0.4953	-0.0153	0.3501	-0.6686	0.7483	-3.4297	1.0928	2.2113	-0.6181	1.5267	0.0607	-0.9178	0.1708	-1.9125	1.2234	1.2139	3.0338	-0.1211	-0.5714	0.04501	1.4178	1.0403	-0.9521	0.2907	-0.2928	-0.2316	-1.7692	-3.9966	-0.265	0.1894	0.8898	1.1073	0.3731	-2.4545	-2.2658	2.2857	-2.0583	-1.1	-2.6727	-0.235	0.8704
UBQLN2	2.2981	0.2311	-0.09009	-0.6933	-1.4645	0.3238	-1.4052	-0.2031	-0.3903	-0.3309	0.5869	0.4367	-0.8374	1.1408	-1.4429	2.7667	-0.4081	-0.08122	0.1236	-1.1861	-0.6623	2.9341	-1.2322	0.4778	0.03385	-0.1848	-0.08973	0.04719	-0.1492	-0.2538	0.334	-0.2898	-0.3587	-0.1403	1.1629	1.0286	-1.0275	-0.2452	-0.3019	0.006493	-0.6237	1.6328	5.0417	3.1035	2.6064	-0.006115	5.8392	1.1988	-0.02063
DMTF1	0.1891	0.2521	0.3757	1.6909	1.9001	0.07728	1.4014	0.03693	0.9961	1.0021	1.5275	0.1613	0.5305	0.3379	2.001	0.7297	1.1139	1.3739	0.2619	0.1104	0.219	1.5142	0.4229	-0.165	0.05232	1.915	2.616	0.6514	1.5526	2.7142	0.6559	0.2468	3.3397	0.4931	0.06806	-0.8647	0.5406	0.7911	1.8246	2.9182	0.6838	-0.03604	0.6144	-0.3232	3.3247	2.7591	2.762	1.8954	0.6059
SCARB1	-1.1235	0.7955	-0.2878	-0.1651	-0.1308	0.4199	0.0639	0.6663	-0.01478	1.3224	-0.1519	0.3821	0.6437	1.0876	0.4589	1.9861	-0.1584	-1.1928	-0.5428	0.5255	2.1114	-0.2276	-0.6798	-0.432	-1.8884	0.1764	-0.3246	0.9254	0.601	-1.4984	-0.5927	0.622	-1.509	0.3497	0.8447	-0.2646	0.2975	-0.02691	0.7346	-0.2041	1.1329	0.8023	0.7997	-1.3388	-0.7709	-0.4115	-0.6438	-1.2778	1.1577
CLPX	-1.4822	-0.3201	-1.7326	-0.3556	0.3204	-0.08265	-0.4496	-0.621	-0.8307	-0.9106	-0.7519	-0.1806	0.01157	-2.0268	0.545	-0.8398	-0.6235	0.0189	-1.5604	-0.815	-1.0443	-1.1233	-0.6795	0.3781	-1.1607	-0.8129	-0.216	-1.231	-0.9082	-0.4575	0.2124	-0.7585	-0.6217	-0.7827	0.1597	2.0853	-0.5152	-0.5437	-1.143	-0.5521	0.2618	1.1074	0.42	-1.6896	0.3765	-0.1127	4.8288	-0.1455	-0.2475
TPM1	1.1724	-0.2485	1.2212	0.05835	-0.7588	0.6087	0.286	0.7453	0.6187	-0.4877	0.1926	1.0239	-0.1481	-0.2856	-2.0475	-3.4979	-1.3274	0.6078	-5.1706	1.1495	0	-3.2686	-0.4536	0.3377	-9.414	0.2396	-0.3793	0.3551	-0.5088	-5.6601	1.1555	0.1486	0.3848	0.4147	1.0568	-4.2997	-0.1603	0.09316	0.5897	-0.6515	0.0091	0.8008	0.5701	-10	0	-0.4306	-9.4275	0.407	-0.2847
TM9SF2	-0.3675	0.2889	0.1404	-0.1949	-0.5295	0.7311	-0.8341	0.3037	0.4145	0.03215	-0.5031	1.0905	0.299	-0.2253	-0.873	-3.5502	-0.4718	-0.1612	-0.8907	0.1174	-4.643	-1.0667	-0.3919	-0.5007	-0.5851	1.22	-0.443	0.4561	0.6035	-1.505	-0.5624	-0.2643	-0.4957	0.9202	-4.0792	0.5048	-0.3221	0.379	-1.5643	-0.1775	0.7038	-0.3178	-0.4414	-0.4055	-0.6511	0.4527	-0.7666	0.384	0.4653
TXNL4B	-1.229	-0.5344	-0.251	-0.6128	-0.3037	-0.4318	-1.1223	0.1013	0.2006	-1.2431	0.2431	0.441	0.152	-0.05749	0.01585	2.3412	2.1853	0.5449	1.68	-0.3367	4.0827	0.0519	-0.03165	-0.4556	0.2844	0.4221	-0.2819	-1.1347	0.5338	2.4378	-0.1564	-0.2075	-0.7346	1.7648	0.6355	-0.6919	-0.7928	-0.8545	2.3661	-0.5398	-0.414	0.8553	0.1407	-1.0026	-0.06252	-0.3037	-1.8238	0.4983	-0.7663
ATF6	0.4966	-0.7772	-1.3139	-1.9269	-0.1107	-1.0082	-0.5539	-0.7616	-0.8107	-1.7486	-1.7598	0.0635	-0.7863	-2.4482	-2.2118	1.0778	-1.4719	1.4453	-0.8674	0.3158	-0.2104	-0.2385	-0.2725	-0.3316	-0.1197	1.0109	0.2869	-0.8097	-0.7613	-0.8594	-1.975	-0.441	-1.127	0.6823	-1.5254	0.1782	0.3054	0.3338	-0.2467	-1.081	-2.157	-0.5768	0.1073	-1.0258	0.8418	-0.8131	-1.508	0.5101	0.442
PRR15L	-0.284	-1.0463	0.182	-0.4576	3.516	-0.3345	0.3544	3.6668	1.48	4.4347	0.7191	5.4054	1.3341	-0.7847	0.02555	3.2257	-0.007963	3.22	-0.5761	4.593	-0.7546	0.8164	-0.3295	0.8295	0.09781	3.8028	2.4655	1.7297	0.2056	3.4289	0.1473	-0.475	1.2708	-0.1306	2.8666	-0.04209	-0.4493	0.982	0.171	1.1695	-0.5293	-0.07075	-0.3802	2.8663	0.2833	3.4605	0.2511	2.9029	1.893
NUP88	1.7129	1.4665	0.2618	1.8788	0.4907	-0.4098	0.1642	0.2463	0.5497	-0.4352	0.2896	0.6779	0.3604	-4.771	0.8821	-0.7042	-0.5452	0.923	-2.104	-0.7901	0.6745	0.0532	0.2095	0.8999	-1.309	0.3246	-0.7316	-1.6363	-0.5314	0.5637	0.8199	0.5607	-0.3865	-0.2879	-0.8603	0.7636	-0.4589	-0.2204	-0.6903	-0.5739	-0.0103	0.7893	0.03912	-2.0347	0.4902	-0.2431	1.106	0.2646	0.01387
ST6GALNAC2	0.5447	1.3084	0.6039	5.5193	0.8248	3.2633	-0.3657	0.7061	1.668	0.4837	1.1578	-0.6418	0.6535	1.2107	1.5857	3.0275	0.8656	0.6546	1.0009	1.0107	4.6663	5.3218	0.2201	0.7236	3.5352	0.2646	1.1691	0.8747	1.0785	1.7296	0.5697	0.2665	0.1972	-0.2497	4.4381	-0.2035	0.4498	1.0404	0.925	1.0344	0.3925	0.4406	0.6855	0.0576	1.0944	0.01132	4.5157	1.5025	0.2751
ADH5	0.0335	0.7545	0.05348	0.5178	0.07145	-2.7466	-0.2297	-3.6244	-0.7291	0.1044	-0.2946	0.8814	-2.1213	-0.8991	0.07885	0.2276	0.4438	-1.5667	-0.9901	-3.2865	1.1576	-0.8375	0.195	-0.6211	-0.2574	-1.66	-3.6141	-0.01188	-4.5045	-1.3119	-0.07404	0.7894	0.2334	-0.1231	-1.19	-0.242	0.9208	-1.7573	0.4656	-2.8552	-0.1707	-0.7672	0.1135	-3.257	-3.2197	-5.2592	-3.5563	-1.3924	0.7567
FUT1	0.2263	-0.919	0.474	-1.3382	0.0189	3.1023	1.3745	-0.3194	0.3812	0.8906	1.1552	-0.2908	2.1724	0.7098	0.2369	2.0345	0.3731	0.8841	0.1203	3.151	-0.5011	1.2516	-0.1343	0.4847	0.4895	1.3402	2.9968	1.3424	3.4911	1.8504	1.0442	0.009486	0.3456	-0.1036	-0.2563	0.4714	0.6366	1.9722	0.775	-0.61	-0.9382	0.3828	-0.2462	3.1187	2.1383	3.7298	3.6825	-0.3539	0.1334
GOLT1B	-0.9875	0.6503	-0.1558	-0.3087	-0.9273	-0.2067	-2.0206	-0.7694	-1.4133	-0.5702	-1.7618	0.057	-0.4611	-1.57	1.5195	-0.9966	0.4985	-0.4707	2.0362	-0.4812	-5.0223	1.0689	-0.7073	-0.4739	-1.9537	-0.154	0.5535	-0.7205	-3.9726	0.2026	0.7622	0.4787	-1.2573	-1.5112	-1.5494	-0.1869	-0.1058	-1.2728	0.6779	0.6579	0.9262	-0.3372	-0.2149	0.196	0.372	0.03547	0.4498	-2.4746	0.3203
PRUNE	-0.4646	0.2028	0.9402	0.04955	0.4636	-0.7768	-1.6114	0.4331	0.7782	-0.691	-0.3661	-0.886	-0.1169	0.3679	-0.7918	-0.7434	-0.6335	0.1246	0.07516	0.1415	-1.0029	-1.4013	-0.577	0.2055	-1.1179	-0.2777	-1.3968	0.05433	1.4947	-1.4803	0.3734	0.2478	-0.6178	-1.01	-0.3041	-1.1596	-0.9233	0.6522	-0.03629	1.0121	-0.4863	0.05763	-0.659	-1.9265	-1.1789	-0.8219	-1.6258	-0.1168	-0.526
PPOX	0.2954	-1.0677	0.4703	0.0012	0.1654	0.9133	0.8636	2.9737	-0.05943	1.1077	0.8842	-1.1611	0.1057	0.02797	0.7035	3.6464	0.9038	1.3972	0.2296	0.8643	-1.2479	0.4192	0.6283	-0.2923	1.2649	0.09223	-0.0123	1.3864	0.5366	2.2483	1.7665	0.5072	-0.4534	0.04414	3.8032	0.4968	-0.7204	-0.1238	1.6146	-0.007245	-1.1301	-0.09047	-0.4991	0.2931	-1.1258	-0.923	-0.7892	-0.8975	0.2254
SYPL1	1.1735	1.2891	0.3752	0.6445	0.2687	0.3079	-0.524	0.5053	0.8493	-0.2693	0.9613	-0.7669	0.6691	-2.27	0.841	-3.2957	0.4877	0.4615	0.2383	-0.5282	-0.2258	0.4381	0.2413	-0.2642	0.4015	0.4379	-0.1357	-0.04096	0.7336	1.0792	0.5208	-0.672	0.1473	0.2352	-1.0743	0.1396	-0.7259	0.2273	-0.0145	0.5539	0.6628	-0.8351	-0.239	-0.1643	0.02013	-0.3448	-0.8376	0.1188	-0.5601
CANT1	-2.4041	-0.5289	-1.1879	-0.5131	-0.02745	-0.7636	-0.5497	-0.1943	-0.49	0.4922	-1.2775	-0.5729	-1.0174	-3.4988	0.4797	-4.652	0.08348	0.573	-1.3532	-0.3697	-5.1578	0.8356	-4.4377	-0.3634	1.3361	-0.9857	0.418	-0.9108	-0.6075	1.3373	-3.3962	-0.08405	-0.8265	-0.5509	-2.8417	1.7461	-0.5766	-1.831	-0.7762	-0.6442	0.05875	-0.06036	0.8443	-1.0237	0.564	0.4095	1.3493	-1.1426	1.3258
ZNF451	-1.6415	-0.03935	-1.784	0.4924	-1.0646	-0.7938	-1.5338	-1.2914	-0.6164	-0.4063	-0.8602	-1.2979	-1.3205	1.8168	-0.3577	0.7646	0.5823	1.2804	-1.2153	-0.1222	-1.0544	-1.1978	1.578	-0.504	1.776	-0.03264	-0.5416	-0.9798	0.3069	-1.0201	-1.0732	0.4657	-0.7371	-1.4424	3.2332	4.7003	0.1882	1.1191	-1.1165	0.1786	-0.2657	-0.0794	-0.1529	3.5659	-0.2499	-0.3761	-0.1536	0.06313	-0.6282
HOMER2	1.1664	-0.1163	-0.5487	1.3307	0.8331	0.9334	-0.7864	0.8091	0.4901	0.317	-0.4101	-0.4977	-0.3075	-1.2489	-0.2622	-0.6756	0.0178	-1.0784	2.5649	0.3705	-3.2879	3.1107	0.9353	0.457	-0.9222	-1.8467	2.1665	-0.5572	-1.1364	-0.4101	0.9396	-0.04067	-0.3725	-0.5491	1.6609	0.624	-0.7049	-0.01488	0.6324	-0.3912	-0.4598	1.0425	1.7693	-0.4267	1.0458	0.4609	3.7525	-1.2452	0.7658
RALB	-0.6675	0.3228	0.1492	-0.3246	-0.4874	-0.6119	-0.2354	-0.1501	-0.7259	-1.2429	0.2471	0.0431	0.07639	1.6556	0.3015	-2.988	-0.3702	-0.697	2.4323	0.4828	-0.1193	0.8475	-0.2835	0.1427	2.1842	0.07937	-0.1433	0.2274	-1.8087	0.118	0.15	0.2057	-0.4391	0.3183	-2.7774	0.7857	0.1712	-0.2571	-1.5891	0.1061	0.1134	0.7749	-1.1356	2.4512	-0.05513	-0.6055	0.1826	0.3719	-1.8298
CLTB	-0.5399	-0.3812	-0.1978	0.01535	0.3415	-0.5919	1.154	0.4973	-1.1433	-0.5039	-0.5992	-0.4581	0.105	2.8897	-0.2797	-1.5804	-0.2738	-0.6496	0.5659	0.6654	-5.2826	3.2432	-0.6272	-0.304	-1.0137	-0.5925	1.6509	-0.1666	-1.6699	-0.7161	2.8476	-0.02185	0.6427	-1.1024	-0.6024	1.0827	0.5269	-0.6816	-1.0808	-0.2241	-1.1479	0.8974	1.0979	-0.1583	0.3114	-0.1975	-3.9239	-0.2109	-0.2871
TRIM13	0.09404	-0.06615	0.3776	0.0242	-0.1807	0.4902	0.596	-0.2936	0.2603	0.9866	0.9037	0.8826	0.8153	2.4516	0.9795	3.8393	0.8878	0.2422	-0.2383	-0.08395	-1.8496	0.6098	-0.01805	0.9423	1.7439	-0.5543	0.4377	1.0607	0.2839	1.3661	0.8109	0.08344	0.392	-0.03423	-0.04901	-0.2209	-0.03128	0.5547	1.729	-0.1457	0.1352	0.51	-0.6071	1.3091	-0.6061	-0.8834	-0.0271	-0.08368	0.5598
FBXO7	-0.6636	0.8536	0.7008	1.4545	0.3198	-0.1333	0.04505	0.6036	0.1954	-0.3903	0.232	1.6844	0.9517	-0.6648	-0.5293	-2.2871	-0.1302	-1.0405	1.7247	0.1872	1.3886	0.2704	-0.374	0.6062	-0.5722	-0.05309	-0.2909	-0.1327	-0.4019	-1.0424	-0.5508	0.4897	-0.6637	0.2848	-0.5607	-0.1919	-0.006143	0.3607	-0.6461	0.1381	0.4621	-0.4642	0.8646	-1.5559	0.3154	0.1864	-0.9495	0.9816	0.2356
PHKA1	0.4684	0.189	0.03202	3.7954	-1.0415	-0.4927	3.6874	2.4846	1.8752	0.047	0.8561	5.5919	-0.7794	0.1881	-0.1162	6.4231	-0.7462	-0.2522	-0.3581	1.3068	-1.0991	-0.1053	6.7157	-0.4182	0.959	3.798	-0.04981	2.7062	-1.076	0.4625	-0.6875	1.3088	3.1969	2.2026	0.2878	1.9019	-0.4136	-0.6475	1.5101	-1.1279	-0.2577	-0.06117	3.614	2.5204	2.0822	-0.428	-0.1138	0.6024	1.7248
CYCS	0.4996	1.0074	-3.6866	0.1737	0.2186	0.15	-1.4529	0.4262	0.5311	1.7342	0.5158	0.9996	0.5993	-3.4813	0.9652	-0.9189	0.2174	-0.748	-1.5691	-0.157	-0.8546	-0.3113	0.1332	-0.7222	-2.3736	0.4469	-0.03597	0.5271	-1.2926	-0.8005	-0.346	0.8075	1.5573	0.4455	-1.2538	1.1689	0.1775	0.3822	0.4209	0.9487	0.3623	-0.2584	0.3895	-2.7862	0.1892	-0.3503	0.1859	0.8384	-0.3004
PPARD	2.3053	-1.702	-0.03904	-0.1793	-0.3345	-0.8248	0.2937	-0.4072	-0.4881	-0.3173	0.4852	-0.5278	-0.1679	0.9557	-0.4006	3.855	0.0436	0.4095	-1.6405	-1.0232	-2.2652	1.8949	0.6175	0.1786	1.2997	-0.2769	0.9813	-0.5719	-1.1946	0.7663	0.06562	-0.1247	0.4182	-0.5842	-0.02811	0.5086	-0.2749	0.02834	-1.5838	-0.695	-1.1948	0.5249	-0.09668	-0.06575	0.2431	-0.4736	-0.1762	-0.6605	0.03045
ENOSF1	-0.1079	0.9196	-0.1467	3.3504	-0.5762	0.7438	-0.4622	-1.1171	0.2179	0.4984	-0.4629	-3.511	1.4678	0.5203	-0.8846	2.2725	-0.636	-1.4848	0.1615	-0.616	-0.3354	-1.928	-0.5013	-0.4351	-0.5994	1.4044	-1.1028	-0.6999	-0.2614	-1.607	-1.9035	-0.7947	3.4662	-0.324	-0.7825	-2.4069	-1.0289	0.6493	-0.4922	-1.732	-1.904	-0.4859	0.1253	-0.3527	2.9644	0.1521	-0.5532	2.01	-1.5609
MAP4K4	-1.0895	-0.07865	-0.4507	-3.8518	-0.4572	1.3953	-0.6883	-0.03722	-1.7077	-0.8405	-0.5493	-0.6893	-3.8436	-0.2435	0.2269	-3.6697	-0.3152	-0.2473	2.8635	-0.818	4.261	0.08485	-1.0388	0.04386	7.047	-3.2452	-0.3073	-0.1742	0.4086	1.3129	-0.8514	-1.4102	-3.2243	-0.2672	0.4385	1.6092	-0.3558	-1.0884	-2.8659	-0.4136	-0.1588	0.7819	0.3941	9.8606	-2.0404	-0.1254	6.0283	-4.1844	-1.528
PAN2	-0.1264	1.1509	-0.4518	-1.2663	-0.3002	1.0443	-0.8385	0.6253	-0.2231	0.5124	1.1459	-0.3076	1.6589	-0.5808	0.4369	2.9723	1.6277	-0.3455	-0.2791	0.5085	4.76	0.6543	2.0864	0.3123	0.9949	-0.798	-0.5949	-0.8611	-0.3952	0.1875	1.0146	1.1411	2.6174	1.3333	1.9927	0.352	2.7526	1.0321	0.3434	-0.4483	1.4816	0.4596	0.7481	-0.7034	0.2343	0.787	-0.2007	1.7944	0.8779
STAT3	-0.7943	-0.5301	0.2764	-0.5425	0.1682	-0.06417	-0.2451	-0.513	0.2741	-1.3846	-0.9336	1.7283	-1.1092	0.02699	-2.0077	-2.1022	-2.1773	-0.5847	-0.0004499	-0.8242	-1.1989	-1.2409	-1.7819	-0.4009	-1.5015	0.2866	-0.1423	0.0862	0.2806	-0.7435	-1.3725	-0.2275	-1.4466	-1.1311	-0.8321	-1.1811	-2.5575	-0.4207	-0.8949	0.3844	-1.3547	-0.6423	-0.64	-0.3685	-0.3868	-0.6225	-1.3142	-0.5603	-0.1996
LIG1	0.08831	0.4751	0.3667	0.0969	0.00505	-0.85	-0.6876	-0.3742	-0.1057	0.1864	-0.7886	-0.4731	0.5327	0.4723	-0.9557	-1.4561	0.4247	-1.1891	-2.7235	-0.5586	-0.0334	-1.3957	-0.4786	0.4175	-1.5	-0.4755	-1.602	0.1624	0.7046	-1.6846	-0.9525	0.6147	0.1659	-0.4886	0.5799	-1.1025	0.2197	0.4025	-0.7224	-0.4669	-1.1295	-0.6623	0.02293	-1.3111	0.4528	0.8118	-1.7853	-0.3485	0.4339
PPIC	-1.5673	0.4063	-0.8907	-0.5334	0.01725	0.6646	0.0864	-0.1684	0.1423	-1.044	0.2395	0.6924	-0.8838	0.02321	-0.5198	-0.7073	-0.8861	-0.07326	-0.1906	0.4281	0.6071	-1.8828	-0.0489	-0.8264	-0.9614	0.6206	-0.2497	-1.2722	0.3229	-0.8613	-0.4384	-0.3789	-0.3562	0.4585	-0.6417	-0.5434	-0.4178	-0.1058	1.0158	0.3051	1.299	-0.6913	-0.5952	-1.8045	-0.6098	-0.1798	-2.865	1.2061	0.3499
EIF5	-0.6004	-0.9776	-0.844	-0.2968	-0.5931	-0.2566	-1.8053	0.3799	-2.2055	-0.5068	-0.2039	-1.4054	-0.2713	-4.0394	-0.3451	-0.1628	-3.0516	-1.4745	-2.8583	-0.5368	-6.0766	0.7976	-0.3196	1.3265	-3.7178	-1.1314	-3.0562	-0.7728	-2.1944	-1.3651	0.5304	-3.3013	-1.4623	-0.6984	1.1839	2.362	-0.6227	-0.5931	-1.1529	-0.4034	-0.1768	0.05116	0.04263	2.1755	0.412	-0.5159	0.9438	-0.7046	0.1125
GNB5	-0.9285	-0.2025	-1.0465	0.2706	-0.6716	-0.864	-0.4691	-0.566	-0.1476	0.1782	-0.8574	-0.5309	-0.8354	1.8788	-1.4091	0.4637	-0.1778	-0.351	-1.2932	0.2169	3.787	0.8756	0.627	-0.09087	2.0549	-0.5992	0.6218	-0.2604	1.463	0.3462	0.1111	0.2888	0.5716	-0.3309	1.4029	-2.2621	0.2691	0.05904	0.1847	0.06647	-1.9018	0.7448	-0.1809	0.5751	0.05098	0.4683	-0.957	-1.2437	-0.174
GNAI1	-0.08064	4.4639	-0.6616	5.2527	-0.7251	3.0467	-1.1086	3.1895	0.7614	-0.2256	-0.2082	10	-0.5721	0.01679	4.2997	1.2298	-0.6236	-0.2248	-0.3946	0.299	5.1634	0.0009	4.3952	0.2718	-1.4806	-0.04558	2.705	4.066	-1.0219	2.8625	-0.8701	-0.5152	-0.5054	-0.5684	3.1259	-0.4641	3.5377	1.7859	0.8452	0.4023	-1.0635	-0.785	-0.0258	-1.2349	3.7844	0.7643	0.7749	0.4016	-0.433
INSIG1	-0.5265	1.2328	0.6296	0.5272	0.5976	0.1667	0.2405	0.9744	1.5126	0.8171	1.0566	0.5961	1.0248	-1.04	1.1355	0.7927	-0.09108	-1.4953	-0.7919	0.5353	0.2632	-1.1231	0.8381	-0.4219	-2.8368	-0.09364	0.6447	0.7897	-1.173	-1.3883	0.6099	1.0826	-0.3812	0.2917	-2.3951	-1.8572	0.3209	0.7926	1.7459	1.4783	1.8336	0.08419	-0.2492	-2.3439	-0.1334	0.4348	0.404	0.1194	0.6601
DNMT3A	1.1895	-0.1666	0.8906	0.05425	0.2038	0.4464	1.643	-0.1833	0.3669	1.2745	0.6723	-1.4888	0.5839	1.181	0.7411	3.765	1.4253	1.2489	0.8513	0.9061	-0.9236	1.8644	0.2286	-0.1964	0.5102	0.7436	0.5701	1.7578	0.5056	1.7901	1.2428	0.4811	0.7589	0.3965	3.5235	0.9464	0.5792	0.3929	1.3844	-0.1103	-0.6595	0.5276	-0.5277	0.2105	-0.2756	0.05725	-0.02809	-0.08324	0.4613
TM9SF3	-1.4346	-0.21	-0.751	-0.6488	-1.31	-0.338	-0.3299	-0.3859	-1.2974	-1.5244	-0.7757	-0.5567	-1.6755	-0.1305	-0.19	-5.163	-0.4427	0.2562	0.05412	-1.9969	-0.3164	-2.6349	-0.06565	-0.127	0.9128	-2.8871	0.042	-2.9426	-0.1305	-0.5879	-0.9515	-0.3516	-1.2436	-0.5356	-3.6086	-1.1286	-2.4737	-1.4942	-1.2362	-0.8415	-0.3427	-0.1344	0.5513	0.1758	0.2037	0.2297	0.04624	-0.1708	-0.06199
CCDC86	-0.6386	-0.6897	0.3009	0.2856	0.1761	-0.7151	1.2131	-0.4615	-0.7404	0.2489	0.7726	0.3863	0.6389	-1.4289	0.6398	1.8437	-3.144	-3.1617	0.5756	-3.1359	-5.1678	3.2821	-0.0662	-0.3746	1.6384	0.161	1.8013	0.3255	-4.3175	2.9241	2.2908	-0.5175	-0.4343	0.2121	1.3004	2.7208	0.401	-1.536	-3.9174	-0.856	-0.1492	1.73	0.07247	0.07946	-3.689	-0.7398	3.1533	-0.2143	-0.4365
HIST2H2BE	0.09884	-0.7322	0.03044	-0.8224	0.5256	0.2609	1.1618	0.3615	0.7097	1.3927	1.2948	0.8994	0.1739	1.1643	0.7771	3.9285	3.956	3.7102	1.1255	3.2185	5.1343	1.8261	-0.2049	0.9035	0.8771	0.452	0.4155	0.8696	4.163	2.1543	1.7106	0.6269	-0.4066	-0.1836	0.5972	0.7269	-0.006252	0.6862	3.5066	-0.01864	-0.8756	0.8947	0.2082	-0.039	-0.1346	-0.4711	0.1394	-0.4333	0.9321
S100A4	-1.2452	0.673	1.0319	1.1151	-0.4217	-0.776	0.3928	-0.2598	0.2565	0.2134	0.846	0.832	0.01744	-0.4044	1.3401	1.9096	0.08237	-0.2854	2.7413	-1.1455	-1.3141	0.2801	-0.7426	0.5278	1.2567	-1.0806	-0.7659	0.5792	-1.1002	1.0405	0.7111	-0.329	-0.06128	0.831	-2.8107	-0.8921	-0.1518	-0.2268	-0.3379	-0.4048	1.3771	-0.004021	-0.0836	2.0701	-0.7903	-0.8747	0.89	-0.3642	-0.6096
SLC25A14	0.1556	0.0105	-0.08074	-0.09735	1.1797	1.3442	-0.2697	-0.3383	-0.211	0.08545	0.2415	-0.3561	0.2704	0.4085	0.869	3.3471	0.7321	-0.353	1.4893	1.455	2.4249	-0.3262	-0.3648	0.3455	0.194	0.6134	1.0093	-0.9102	1.0685	1.2594	1.2934	0.766	-0.3456	-0.6463	0.8607	-0.8091	-0.5507	0.4325	-0.6948	0.5221	0.725	0.6531	-0.6127	0.5785	0.07162	-0.6326	-0.176	-0.7574	0.7299
KTN1	0.01377	0.3956	0.6949	1.0157	0.09585	1.2098	0.8712	1.1861	0.7155	0.06635	1.3374	0.136	1.3737	-0.2289	0.3577	-1.7648	0.2961	-0.9965	-0.09328	1.5643	0.7733	-0.5558	0.4562	1.6317	0.5343	0.03525	-0.4821	0.5897	0.3203	-0.7437	0.9054	0.3782	0.3643	0.8636	-0.5798	-0.375	0.5196	0.3782	0.2753	0.2526	-0.4655	0.05349	-0.04853	-0.6005	0.837	-0.01307	-0.8849	0.46	-0.4782
TBXA2R	-1.0598	1.0751	0.243	-0.1836	0.49	0.335	0.1003	3.4843	0.6058	-0.5897	1.4632	1.257	0.4339	1.3087	-0.6942	3.5281	-0.1892	-1.3048	2.2027	0.7618	-0.3589	2.4701	0.9665	0.2378	-0.824	0.2523	1.0499	-0.2381	-0.7104	0.5134	0.2591	0.5995	-0.6912	0.3257	-0.2181	4.8	0.3828	0.1628	1.5032	1.5912	1.4468	-0.9497	3.6414	-1.1695	-0.1961	0.4002	0.5743	0.1105	-0.5741
ARHGAP1	-1.5696	-0.6	-0.06743	-0.5805	0.3902	-0.1067	0.6881	-0.5011	0.2355	0.3698	0.2914	0.2877	-1.1489	-1.2792	-2.067	-1.753	0.06372	-0.2248	2.2317	-0.02892	-0.2787	0.6243	-0.0566	0.514	0.695	-0.2336	0.1308	-0.3685	-0.1541	-1.2221	-1.221	0.3531	-0.3082	0.01726	0.1904	-7.7396	0.002567	0.1492	-0.2754	-0.4679	-0.9279	0.2582	0.5515	0.6653	0.5329	0.2175	-1.0842	0.6057	-0.8883
FBXO11	-0.2494	-0.5421	-0.01854	0.124	-0.6758	1.938	-2.4945	7.3336	-0.6732	-0.2775	5.3119	-2.388	-0.5833	4.2936	-0.5979	1.9729	3.2009	0.1264	-0.2023	-0.8035	-0.8039	4.1105	-1.5812	0.6595	-0.8752	-0.3389	-1.6352	-0.7395	-0.4569	-1.334	2.8082	0.09624	4.3393	-0.2258	-1.0146	-0.5056	2.6637	0.3791	-0.8859	-0.5048	-0.7512	-1.1747	-0.7431	-1.1739	-0.03572	-0.546	0.1341	0.9642	-0.2744
HERPUD1	4.4929	0.5723	-0.1051	-0.2571	-0.1348	-0.09512	-0.5323	-0.01554	-0.7034	-0.03205	-0.8079	0	-0.687	-1.0975	-0.3832	1.6942	-2.6694	0.6529	-3.4381	-0.1393	3.237	0.9064	0.5324	-2.8209	-3.721	-0.5343	0.5713	-0.2437	-1.3613	-4.3318	-1.6363	2.2494	-1.119	-0.6643	-2.3465	-3.7268	-0.5075	-0.4507	-1.7948	-4.6043	0.2991	-0.1263	-0.6454	-6.0345	-0.3984	-0.5331	-0.8319	-0.5054	1.6374
LPAR2	1.1279	-0.3674	-0.357	0.3972	0.4747	-0.209	-0.2235	0.2488	0.9926	0.4074	-0.0816	-0.7919	-0.3802	0.8137	1.6315	3.8097	3.9294	1.6765	1.8497	0.5636	-1.4026	0.4226	0.7477	2.229	0.2417	-0.4577	0.9646	-0.3277	0.8315	4.0968	2.6468	0.9917	-0.2803	0.394	0.152	3.1952	-0.5234	-0.5088	3.3521	4.4016	1.4044	1.2745	0.6225	4.813	-0.5213	0.5901	0.4888	-1.0324	0.3154
COASY	1.0013	0.0186	0.6073	1.2002	1.505	-0.243	-1.5066	-1.1506	-0.4963	-0.8895	-0.9762	1.2486	0.978	-3.2631	-0.1362	-3.7997	-0.4988	-0.7817	-1.598	-0.8309	0.3465	-0.0682	-0.6535	1.7437	-0.7413	0.4483	0.1553	0.06687	-0.5582	-0.2996	0.9876	-0.1721	-1.0202	-0.3048	-2.6437	-3.2915	0.001792	0.332	-1.5473	-0.7413	0.3558	1.4725	0.02673	-1.0353	-1.0624	-0.3128	-0.7836	-0.7668	-1.0077
RPL39L	-0.552	0.186	0.3315	0.2855	0.3611	-0.6485	-0.4554	1.9619	0.9327	-0.5678	-0.909	-0.304	-0.5623	-1.1078	-0.7499	-0.4785	-0.4929	-0.4523	-0.4886	0.06353	-0.2455	1.5299	0.2465	0.4652	-0.2673	1.2948	-0.2257	0.5917	-0.05882	0.8641	-1.8251	0.08549	-0.4428	-0.8723	1.7135	-0.4808	0.2929	0.7814	2.4449	1.089	1.1528	0.04536	0.5367	-0.2257	-0.5303	-0.4143	0.7042	-1.0011	-0.185
BPHL	-1.6892	-0.01455	-0.7263	-1.1558	-0.9724	0.4221	-1.0803	-0.3522	0.153	0.3193	-0.6235	-1.1178	-0.3038	-1.2004	-0.2359	-0.4006	2.9755	-0.6999	-0.8908	0.9979	2.1272	2.688	-0.1375	-0.048	0.6052	-1.232	-0.1228	0.9164	1.3181	-0.2813	-0.3091	1.1073	-0.983	-0.8194	-0.3067	0.5985	-0.9579	0.04449	0.8066	1.6406	-0.7143	-0.4219	-0.1037	0.3209	-0.7229	1.2426	-1.5781	-1.2497	1.5116
RASA1	-0.1207	0.4257	-0.2314	0.2063	-0.4204	-0.06704	-0.2774	-0.2238	-0.3818	-0.364	-0.1828	0.0551	0.1067	-0.528	0.8537	0.0452	-4.106	1.3221	-0.3589	-1.4005	-5.2189	-1.1524	-0.822	-0.8736	2.6923	0.5769	-0.2691	-1.914	0.0997	0.6225	-2.008	0.3217	0.1721	-0.2946	-0.2919	-1.4542	-0.09143	0.5311	-0.3005	-0.5384	-1.2673	-0.5636	0.05767	2.5278	-0.1819	-0.325	0.1961	-0.07709	-0.8221
ATMIN	1.2534	-0.7418	-1.7658	-0.1979	-0.7003	-0.5688	-0.8832	0.497	-0.7623	-0.3166	-0.1459	0.5366	-0.764	-2.2959	-0.9303	-4.3054	0.7256	-0.2139	0.2285	-0.6345	-2.3253	0.5078	0.5518	-0.3541	1.4686	-0.3988	-0.4752	-1.2878	-1.1999	-0.06515	-0.9063	-0.4076	0.1391	0.4234	1.344	-1.434	-0.3996	-0.3826	-0.7913	0.1419	-0.09255	-0.9392	0.6533	1.8465	0.5867	-0.02395	1.4198	-1.233	-0.4627
MAPKAPK3	0.3258	1.3726	2.4481	0.4383	1.381	-0.2241	-0.9855	-0.422	0.3207	-0.9864	0.07595	-0.228	0.0298	0.7185	1.2181	1.6294	0.2092	-0.4129	1.1538	0.5866	-0.7648	0.0762	-0.1424	-0.659	1.8024	0.9647	-0.493	0.6926	1.2991	0.7325	0.02885	-0.4442	-0.1946	-0.4265	-0.5933	0.7069	-0.4833	0.3152	-1.6958	1.1601	-0.4189	0.4452	0.1221	3.4517	0.1221	0.4246	3.0924	0.308	-1.8066
CASP3	1.3936	-0.3877	0.3625	-0.901	1.1736	0.4779	1.1295	0.4363	0.5813	1.7236	1.8997	-0.8004	1.862	3.1024	1.1325	0.5788	0.07355	0.9727	2.551	0.3601	-0.1111	1.0694	0.8666	1.6206	1.2627	0.8234	0.5236	1.9947	0.4594	1.4065	0.9406	0.09128	1.9574	-0.1626	-1.7586	-0.4275	0.3539	1.6075	0.8578	0.4167	-0.5439	0.746	0.253	2.5906	-0.6489	-0.4794	-0.1599	0.6774	0.1845
MBOAT7	-1.7714	0.03855	-1.0345	0.4791	-2.8711	-0.6792	-0.5441	-0.008901	-1.0147	-0.4771	-1.9568	-0.1594	-2.3716	-0.2875	-0.3048	-0.1724	-0.5547	-0.2799	0.1459	-0.3253	-0.566	-0.1405	-0.01785	-1.8032	0.1134	-1.053	-0.06028	-2.1979	-0.4895	-0.421	-0.6739	-0.3519	-2.4008	-0.03032	0.6608	0.3815	-0.6278	-1.7065	-2.011	-1.2676	0.4873	-0.003309	-0.2257	-2.2993	0.05189	0.4311	0.7287	-0.686	-0.2876
PNKP	-1.0076	-0.07285	-0.4606	0.3502	-0.2916	0.4655	-0.256	0.1737	-0.5301	0.1501	-0.8293	-0.4802	-0.1948	-2.063	1.0693	-1.6466	0.02593	0.1822	0.8638	0.08457	-0.8559	-0.8821	0.4987	0.7356	2.4195	-1.125	-0.09372	0.08985	1.0644	1.4581	-0.2914	-0.304	5.0764	-1.3028	2.4614	-4.462	-0.4372	-0.04847	-0.6348	-0.1822	0.4639	0.5084	-0.4557	1.9005	-0.8594	-0.6953	0.6948	1.3253	2.8009
PSME2	-0.4558	0.5867	0.05049	-0.6174	0.1784	0.1327	0.1522	-0.4677	-0.5376	0.5096	0.1579	-0.2095	-0.9419	1.0988	0.6062	-0.7086	-0.1667	1.5001	0.247	-0.04152	0.7659	-1.1373	0.3715	-0.8175	0.2411	1.1195	0.5101	0.3095	2.4402	0.8239	0.2291	0.1046	1.0923	0.6453	1.7178	-0.3824	0.4518	0.0069	0.1257	0.6348	0.9418	1.4657	0.4761	-0.04369	0.2457	-0.364	-0.8756	0.7846	0.8518
NISCH	-0.2848	0.6363	0.03502	-0.7585	-0.3812	0.1098	-0.116	0.3604	0.1108	-0.636	-0.6021	-3.0348	-0.6376	0.5022	-3.6854	0.5393	0.185	-1.0909	-4.151	0.1923	-0.5522	-1.2317	-0.119	-0.5283	0.2308	0.2797	-1.098	0.3119	0.7776	-2.712	-2.4916	0.2704	-0.4171	0.3745	0.1537	0.3697	0.1464	0.7985	-0.5565	0.5245	-0.0505	-1.0138	-0.6225	0.2379	0.1309	0.37	-1.0422	0.6274	0.03149
SLC35A3	-0.2165	0.1019	0.009675	-0.136	0.1417	-1.5189	-0.6159	-0.337	-0.02366	-0.8284	-1.1316	5.7005	1.0613	0.3824	3.4378	2.3292	-0.7135	2.8519	2.9067	0.2949	1.0834	-0.01425	-0.9094	0.1201	-0.1019	-0.7611	-0.02904	-0.06794	0.1775	0.3985	2.5475	-0.3803	-0.09937	-0.7441	-0.9821	-0.9644	-0.3803	-0.1741	-0.6214	-1.3925	0.4156	-0.4144	1.5368	-0.997	-1.5223	-0.9758	3.44	1.6314	-0.2519
CPSF4	1.1459	0.1982	-0.5262	0.8439	-1.2273	-0.1768	-0.4485	-0.4472	-0.03092	-0.7555	0.7086	-0.1746	0.491	-2.7424	0.9291	0.207	-0.9832	-0.2722	-2.3469	0.1163	2.3207	-1.7961	0.7846	-0.0531	0.6938	0.1407	-0.5228	-0.2324	0.01876	-0.02672	-0.5965	0.0449	-0.4625	0.01495	1.1011	0.4562	-0.2904	0.6282	0.02507	-0.4029	-0.3163	-0.4008	-0.5232	-0.4514	0.3534	-0.5962	0.3452	0.6721	-0.994
LSR	-0.5184	0.2215	-0.9463	-0.8068	0.6441	-0.5167	4.6543	-0.8809	-0.09927	-0.8579	-0.7683	-1.1306	-0.4147	3.1577	0.5663	5.0894	-0.4616	0.2029	0.5015	-0.6789	-1.9511	-1.2656	0.0339	-1.3751	-0.2182	-1.0181	-0.5649	-0.8714	0.7362	-0.5448	-0.5926	0.6071	0.716	-1.1868	1.2299	-0.2991	-0.731	-0.6448	3.2891	-0.1702	0.2025	0.1045	0.1476	4.9882	3.4717	0.0579	0.1482	-0.8028	-0.067
COPB2	-2.7744	-0.0163	0.4517	0.07395	0.2838	0.4501	0.9122	0.8297	0.1508	0.1103	-1.1909	0.3453	0.6716	-1.1939	-0.8224	-3.3821	-0.2682	0.00804	-2.6179	0.4847	-0.6019	-0.4846	-0.3952	0.6478	-1.7791	0.4162	-0.8375	-0.589	-0.2866	-2.4597	-0.4012	-0.1193	-0.6071	0.1336	0.256	-0.1649	-0.2402	-0.1641	-0.5238	-0.7163	0.09495	0.8467	-0.196	-1.9896	0.5919	-0.03358	-2.2753	0.8782	0.5601
MEF2C	3.1554	0.4009	3.095	-1.5081	0.0992	-0.9379	-0.3024	1.6118	-0.1053	0.6181	-0.5734	-0.2137	-0.699	0.994	-0.3784	4.3123	4.0326	0.1206	-0.005263	-0.6795	5.2172	5.128	-0.7967	1.163	0.7271	0.2306	0.9668	-0.9077	3.3999	0.2903	0.5232	-0.4834	-0.2334	-1.0822	0.2977	3.0367	-0.1844	0.8162	-0.1431	0.5414	0.5945	-0.1881	-0.2391	-0.5629	-0.6034	-0.9476	3.2155	0.2538	-0.5707
GADD45A	1.9534	-0.0915	0.4643	0.3472	0.5636	-0.7527	0.2841	-0.2112	-0.1367	-0.5059	-0.1487	0.9752	-0.1895	1.6993	-1.9004	-2.0415	-1.9382	0.6299	-0.1906	0.9474	0.1106	2.5542	0.3577	0.4496	-0.7485	0.7789	1.7244	-0.03887	-0.6268	-1.6291	0.3284	-0.293	1.3308	1.3014	0.2444	0.7445	-0.1533	-0.3714	-0.932	-0.8591	-0.7056	0.8617	0.8288	-0.06082	0.1762	0.05856	0.2998	1.7625	-1.271
KDM5A	0.4772	0.9516	-0.5649	0.8419	0.123	-0.3268	-1.3995	0.1645	-0.5169	-0.0422	0.0358	0.8609	0.4835	-0.06261	0.8458	0.9782	-0.6498	2.003	-0.6119	0.3741	0.9165	-0.0405	-0.0438	-0.1	0.3268	-0.2738	-0.3395	-1.6489	1.8121	0.06024	0.05472	-0.2181	0.1742	-0.2646	0.9203	-1.1401	-0.195	-0.5318	-0.2415	-0.1393	0.6207	0.4586	0.4711	2.0351	0.8293	0.482	0.7812	-0.3457	-0.9417
FAM63A	-0.8522	-0.01805	-0.809	0.3758	-0.8016	-0.5135	-2.5046	-0.1422	-0.433	-0.9933	-2.6087	-0.3653	0.4611	-1.8733	-0.3573	0.356	-0.6267	-1.103	9.3714	-0.9944	1.0919	-1.2766	-0.4628	1.3039	0.2008	-0.2775	-0.3551	-0.9559	0.2342	-1.3006	-1.2363	-0.244	-0.8604	2.8668	0.3716	-1.0201	-0.1151	-0.1011	-1.2439	-0.7944	4.4968	-1.2591	0.244	4.7115	2.7045	0.1556	3.7528	-0.8672	0.2951
SMNDC1	-0.1891	0.8769	-0.2368	0.1828	-0.3339	0.1254	-2.2484	-0.6231	-0.07571	-0.5858	-0.5122	-0.0681	0.06401	-1.8892	-0.2991	-0.2075	0.826	-0.1863	-1.2002	-0.7741	-0.9376	-0.3035	-1.5388	-0.1364	-1.07	0.08584	0.1279	-0.8038	-1.5182	-1.6177	0.8338	-0.3402	-0.1422	-0.8163	-1.2631	3.6974	0.1149	-0.02641	-0.1711	-0.3344	1.669	-0.3235	0.3215	-3.0291	-0.2557	-0.3213	0.9968	-0.5706	-1.0256
NUDCD3	-0.1121	-0.357	0.2741	-0.5165	0.0446	-0.1384	-0.4075	-0.5245	-0.4203	0.01495	0.4381	1.3664	-0.3407	-1.9173	-0.6372	-0.6046	0.3715	0.3977	3.0984	0.7419	-1.2743	0.5181	0.5307	-1.6759	1.8479	0.5643	0.01353	-0.2079	0.1457	-0.1557	-2.0745	-0.04545	-0.1606	0.6492	-1.7004	-5.0816	-0.05826	0.579	-0.5184	0.4691	-0.4382	-1.1739	0.2124	-0.6536	-1.1973	-0.448	1.6282	0.703	-0.403
RAB4A	0.4699	0.088	-0.1138	0.2955	0.226	-1.1105	-2.0398	-0.4433	1.2515	1.6611	-0.9718	6.3131	-0.2722	1.0294	1.0093	-0.5167	2.9383	-1.0729	-1.7765	0.5158	3.422	0.2726	3.4864	-0.6576	-0.2666	-1.4488	-0.5205	-0.3931	-0.8182	0.4838	-0.1486	0.05835	-1.2425	-0.5433	0.5325	1.6546	2.1741	0.09135	-0.2426	1.1722	-0.1549	-0.4239	0.7258	1.5893	3.1936	0.5888	1.7036	-1.0525	-0.3012
FGFR2	-0.2976	-0.2402	0.1414	0.1129	0.0153	0.2122	1.0382	0.5007	0.6073	0.1485	1.2884	-0.2305	0.334	-0.02187	-0.3518	1.1624	0.03207	-0.1773	-1.5258	0.4245	-0.7583	0.4018	0.2605	0.3596	-1.0668	-0.1408	-0.03745	1.1422	0.1386	0.3238	1.2041	0.3315	-0.5527	-0.4811	0.05113	-0.4361	0.8514	0.435	0.4972	0.7293	-0.2261	0.2711	-0.4993	-0.8421	-0.111	0.62	-1.4493	-0.113	1.7652
IFRD2	0.3031	0.7638	0.4724	1.0893	1.0563	0.4989	-0.0943	0.9879	-0.1344	-0.45	0.918	0.7675	0.3548	-1.0225	0.5638	0.2722	1.5104	-2.2567	0.03118	0.1982	-0.1913	0.8453	0.5565	-0.4073	-1.7637	0.0457	-0.2541	0.842	-1.1552	-0.4704	-3.3819	-0.2318	0.2265	0.5262	-1.2991	1.0339	0.2567	0.07764	-0.8332	-0.004135	0.2441	0.4188	0.4557	-2.1934	0.1577	-5.3976	-0.6234	0.008979	-0.06217
BACE2	-0.8214	0.2204	-0.3389	-0.3052	0.8522	0.4936	-0.1979	-0.3443	0.0324	0.1342	-0.3919	-0.5245	0.2586	0.8553	-1.1493	-1.7698	0.3839	-0.02422	0.1795	0.5294	0.4557	0.4831	-0.6235	-0.4162	-0.9894	0.432	-0.4347	-0.5843	0.3963	-0.2891	0.7486	-0.2411	-0.6986	0.5054	-1.8453	0.9309	0.7119	0.3791	-0.1424	0.5086	0.1572	0.03891	-0.851	-0.9034	0.6216	0.4383	-1.0442	-0.1915	-0.5973
HMGCR	-0.02096	0.5669	0.3906	0.5109	0.01785	0.4804	0.1178	0.4706	0.6834	-0.09875	0.0244	0.3492	0.1668	-1.3986	-0.1367	0.3867	-0.4287	-0.9312	-0.8932	0.4653	0.196	-2.1457	0.0308	-0.1084	-1.6864	-0.07873	0.2733	0.5244	-1.0508	-2.3893	-0.3227	0.5846	0.4466	-0.2852	-0.6491	-2.1938	-0.1737	0.369	0.7888	0.4522	0.5391	-0.07846	-0.6894	-0.6374	-0.4025	-0.1126	0.8396	1.2043	0.3288
LYN	0.342	0.2202	-0.5686	0.4518	-0.0483	-0.7197	-0.6411	-0.3202	0.5778	-0.3671	5.0563	10	0.8984	0.276	-0.65	1.3913	-0.04361	-0.9735	0.1073	0.4999	-0.5615	-0.3826	-1.0121	0.468	5.7315	1.1417	-1.0157	-0.8904	3.7713	-0.3943	0.04659	0.6088	0.5128	-0.1166	0.3912	-0.1522	-0.2616	-0.6698	7.5879	6.196	-0.4838	-0.5075	3.1922	-0.979	-0.8378	5.0095	1.2808	0.3224	-0.3535
SLC35B1	0.5325	1.0963	1.5545	2.0024	-0.5519	-0.1903	-0.129	-0.6018	0.3715	-0.3417	0.68	1.5549	-0.09255	-3.1501	0.2249	-3.1784	1.1643	0.5427	-0.6694	0.4985	0.09165	-0.352	-0.1994	-0.9241	-2.428	0.9734	0.4391	0.1612	1.4743	-0.4832	0.8076	0.3535	0.5651	0.7325	0.8265	2.9278	-0.8341	0.007593	0.7209	0.3017	0.6682	-1.3916	0.6037	-1.7871	-0.4333	-0.1998	-0.6639	-0.2801	-0.1026
ISOC1	0.4541	-0.5684	1.7121	0.192	0.3564	-0.06907	1.1482	-0.07778	0.2468	0.9525	0.4409	-0.5359	0.5155	-0.3613	0.6838	3.6095	1.2935	0.787	-1.576	0.5025	-1.5614	0.6707	0.1495	0.3948	0.6642	0.2042	0.0463	-0.1415	0.4158	1.4413	1.2371	0.3492	0.4278	-0.2556	0.5684	1.2656	0.1954	1.3812	0.9189	0.05988	-1.0324	0.6941	-0.05964	1.8035	-0.6427	-0.3054	1.4728	-0.6269	0.4735
TIMP2	-1.9782	-0.2217	-1.6456	-0.0403	0.0825	-0.01741	0.5867	0.2096	0.2606	-0.5289	-0.9949	-0.5208	-0.5783	0.02966	-1.446	1.9486	0.7816	-1.5029	2.5271	0.4636	-0.2932	0.493	-0.86	0.2887	-2.7194	0.148	-0.7259	-0.2775	-1.0361	-0.8649	-0.538	0.2727	-1.1043	0.1346	-3.579	-0.1911	0.2066	1.046	-0.661	-1.2144	-2.1705	-0.8613	-0.2348	-1.8457	0.902	-0.3605	-1.4331	0.7571	-0.986
DUSP3	0.2568	1.5293	-0.01656	0.6072	-0.1996	-0.1948	-0.7499	-0.2018	0.4039	1.2735	0.8115	0.0832	0.2267	-0.2047	0.2075	0.1326	-0.2252	0.4137	1.1098	0.1915	0.8164	-0.3638	0.2531	-0.1706	-0.6394	0.6342	1.0782	-0.4184	1.5339	-0.07295	0.5971	-0.1663	0.7732	0.287	-0.3082	-0.6148	-0.2654	0.4141	-0.2514	0.2357	-0.003	0.06188	1.3839	-1.3242	0.7254	0.704	1.9538	-0.1975	0.9187
LSM6	0.5093	-0.4417	0.3988	-0.426	0.5275	0.4578	-0.09115	0.5002	0.119	-0.7675	-0.0334	0.9395	0.6937	-0.3779	-0.3132	-1.3905	0.8178	-0.8849	-1.7846	-0.1642	-0.7229	0.5114	-0.4664	-0.2595	0.1185	0.5715	-1.3095	0.3596	-0.9173	0.4617	-0.6271	0.5188	0.5197	0.2334	-0.4989	0.5749	0.4028	0.3457	-0.5129	0.3461	0.3302	-0.3814	-0.7494	-0.2429	0.3822	-1.3668	-0.9355	0.804	-0.7056
CALM3	0.02278	0.5056	3.2914	1.3204	-0.1569	1.5136	1.7441	0.9048	1.1472	0.9555	3.0786	-0.6817	2.011	1.2839	-1.0778	3.0353	1.1547	0.6902	-0.1879	2.2917	-0.9873	-0.3474	-0.513	0.7352	-0.3448	-0.2391	0.502	2.3984	0.2305	-2.2242	1.6651	0.1634	1.7664	1.7545	1.2858	2.2728	1.1471	0.7605	0.04916	-1.0063	-2.1698	-0.7822	0.4357	-0.7097	0.1386	-0.4184	0.07792	-0.1034	0.2934
MOK	0.5828	0.8157	-0.3057	0.132	0.4683	-0.3187	-1.2061	-0.2313	0.1789	0.1371	0.09915	0.3764	-1.7265	1.2681	0.5148	-1.2445	-0.1705	1.6112	-0.5173	1.2529	-1.7868	1.6097	-4.7828	-0.9599	-2.3226	0.5132	1.1336	0.0455	-1.6269	0.07474	0.09326	0.4628	-1.3104	0.02686	-3.6625	1.2924	-1.5828	0.02718	-0.6009	-0.01786	-0.9132	0.3936	1.302	-7.2682	0.4949	-0.4689	-0.7757	0.2715	-0.4706
PPP1R13B	3.5145	-0.8345	2.4124	-0.1085	2.5645	-0.1359	0.4257	0.06538	-0.2375	0.7017	0.2922	0.1783	0.2739	0.573	0.8702	3.8152	0.7043	0.9209	-0.144	0.004228	-0.2291	1.5122	0.3075	-0.1734	1.0603	-0.3214	0.2334	-0.007792	0.4523	1.4627	3.9048	3.561	4.6396	0.4676	0.5272	3.4448	-0.8308	0.83	2.2114	0.3191	-1.087	0.7357	-0.1404	-0.3652	-0.437	-1.0958	0.1506	-1.1114	0.4749
SACM1L	1.1611	-0.3	-4.1815	-0.1376	0.2128	-0.3811	-0.7881	-0.6448	-0.6601	0.2202	-0.8276	0.2776	0.0529	-1.142	1.1646	-3.7745	-1.0807	1.4632	-0.2664	-1.4279	-1.0017	0.5482	0.8892	0.2054	0.4122	0.2491	0.1948	-1.6563	-0.07165	1.3964	-0.4977	-1.0308	-0.9106	-1.1286	1.5055	1.7594	-0.5373	-0.4622	-2.9825	0.04671	0.8282	-0.1607	-0.03864	-1.0785	0.3063	-0.291	0.573	-1.0904	-0.8339
DNAJB2	0.6808	0.1129	-0.2507	0.6779	-0.0649	0.2461	0.7977	1.8378	0.1318	-0.6048	-0.1635	-0.7424	-0.03301	-0.4103	-0.1819	-1.2396	-0.0309	0.3445	-0.2598	0.32	-0.4171	1.2801	-1.5989	1.2591	-0.7496	-0.2962	1.0937	0.9673	-0.1018	-0.406	0.1294	-0.1606	-0.3604	-0.6028	-0.1978	-1.166	0.1559	0.2954	-0.4585	0.524	-1.0744	-0.6827	1.0157	-0.2917	1.4925	0.2859	-0.3525	0.6573	0.7367
TCERG1	-2.0731	0.8891	-0.5332	1.2783	0.4958	-0.7921	-0.5454	-0.773	0.2394	0.05685	0.4205	-0.5346	0.3796	-2.0625	-1.347	-1.67	-0.3154	-0.3458	-1.0386	-0.5382	0.1901	-0.4769	-0.1627	-0.03527	-2.1649	0.7319	-0.4759	-1.2986	-1.1336	-1.6555	0.2795	0.2583	0.3365	0.484	0.3861	0.6655	-0.6175	0.2287	-1.0967	-0.5863	0.32	0.4891	0.241	-1.5803	-0.2838	0.5314	-0.1732	-0.2629	-0.6671
CERK	-0.2783	-0.8794	-0.1299	0.1549	0.4322	0.03095	0.7638	1.7385	0.2295	-0.0046	1.1966	-0.7584	0.6364	0.8944	0.5293	4.0764	1.7293	-0.3799	0.5795	0.6094	-0.6549	2.3502	0.03495	0.08983	1.43	-0.1884	-0.04045	3.4812	-0.7713	1.1418	1.2761	0.183	-0.05253	-0.09584	1.6618	1.458	0.4658	-0.0426	0.9444	-0.4667	-0.9823	0.01776	-0.05357	3.7401	0.1582	-0.4419	1.4501	-0.4169	0.1871
KIAA0196	0.2538	-0.0475	0.4539	-0.2991	0.6154	0.3926	1.6159	0.6936	0.3442	1.2832	0.7785	-0.6091	0.6936	-1.3337	0.0046	3.9866	0.9763	-0.2492	0.00412	0.9005	1.0872	1.4922	0.5858	-0.003118	1.1086	0.6035	0.6708	1.145	-0.5167	1.3429	0.2497	-0.1083	-0.2825	0.8954	-1.7114	1.5002	0.1761	0.4697	1.8778	0.4844	-1.4014	-0.326	-0.2536	-1.2452	0.3614	-0.2946	-0.5599	0.7352	0.8039
DNM1	-2.381	0.1634	-0.5954	-0.0534	0.09475	-0.1459	-0.4667	0.09146	0.06466	-0.177	-0.4732	-0.2955	-0.7096	0.5274	-1.4899	-0.4591	0.4865	-1.5772	1.0451	-0.008466	-0.9606	-1.8364	0.1294	2.8505	-0.9309	-0.6624	-1.9262	-0.5582	0.7925	-1.8487	-1.2238	0.2195	0.2079	-0.3317	-0.556	-0.2674	0.1027	0.3165	-0.6999	0.05879	-1.1508	-0.2413	-0.1538	-0.2455	0.1955	1.8075	-1.5163	-0.9079	0.09987
LAP3	-0.7215	-0.1417	0.06107	-1.0105	-3.3699	0.02043	0.762	-0.8498	-0.6232	0.2465	-0.905	0.791	-0.7669	0.1749	-0.6306	-0.0382	-1.0883	1.2306	-1.6752	-0.4043	-1.9331	-1.0383	0.1488	-0.7166	-0.5556	1.5279	0.01275	0.2194	1.6718	0.02182	-1.0844	-0.2208	0.03436	0.428	1.3147	-0.6229	0.288	0.2609	-0.4091	-0.3848	0.3646	0.4099	-0.01761	-0.02369	-0.06806	-1.2086	-1.0587	1.2867	0.07167
DDIT4	7.6245	-0.4686	-1.95	-0.2086	-1.263	-0.4633	-0.3764	-1.9368	-0.534	-1.0293	-1.9481	-0.1446	-2.5845	-2.0956	-2.7402	0.242	-0.653	-1.3208	1.8654	-0.8886	0.2989	-2.4759	0.692	-0.7298	-1.9524	-0.4552	-1.5706	0.2871	3.0171	-5.6842	-4.1469	0.42	-0.3127	-1.6873	-5.0491	-0.3683	0.4314	0.2248	0.2848	0.388	0.4664	-2.8945	-1.6437	-0.9599	-0.9433	2.5289	0.691	-0.5656	0.8618
MAPKAPK5	0.4021	0.02645	-0.1385	0.3279	-0.3403	0.07993	-2.024	-0.418	-0.2331	-0.2659	0.7852	-1.3979	-0.2828	-1.2332	0.382	0.04621	-0.6707	0.1904	0.87	0.3045	0.2785	-1.3163	-0.372	-0.2946	-1.4453	-1.0176	-0.05592	-0.7752	0.1353	0.1885	0.4044	-0.4377	-1.4223	1.0496	-0.5698	-0.4561	-0.501	0.3269	-0.6186	-0.5336	0.7801	0.3959	0.08796	-1.1261	-0.4703	0.3328	0.45	1.2364	-0.1474
ALAS1	-0.1681	-0.8687	-0.5293	-1.0699	0.3643	-0.01815	1.6298	0.07847	0.1257	0.9011	0.9014	-0.7923	0.09377	1.2748	0.7165	2.7194	0.7846	1.3447	1.0283	1.0444	-0.3812	1.5061	0.9395	0.01243	1.5748	0.3527	0.5186	0.5325	-0.2458	2.0188	0.7475	0.2472	-0.11	-0.7953	-0.4506	2.9619	-0.0724	-0.6973	1.0791	-0.2115	-0.864	0.9512	-0.3533	2.8276	-0.4393	-0.7654	1.1793	0.07089	0.5746
HDGFRP3	0.9615	0.06595	0.1765	4.4855	0.5224	-0.06725	-1.1506	0.0535	0.9522	0.3827	0.02405	0.7848	0.6516	4.2009	5.4179	2.2087	0.404	2.8776	-0.8937	-0.6112	3.4182	1.0057	0.1935	-0.1616	0.001935	0.3327	1.1116	-0.7486	-0.949	-0.4453	-0.3651	0.5926	0.1295	0.01951	1.4013	-0.1952	0.1517	0.6184	-0.1478	0.4377	4.8724	-0.7102	-0.2812	-0.1176	0.5657	1.9089	2.1904	-0.4308	-0.9379
PAFAH1B1	0.2691	-1.1343	0.21	0.02435	0.5134	0.02753	1.3971	0.4182	0.3034	0.6697	0.7382	-0.6959	0.4118	0.5217	0.3566	3.7154	0.1606	0.6711	0.319	0.9087	-0.5062	1.485	1.0141	0.6721	1.6515	0.2782	0.439	0.5214	-0.1623	0.6739	1.0048	0.2951	-0.2913	0.03509	0.6982	1.0158	-0.3284	-0.2694	1.4261	0.2771	-1.1718	0.3102	0.3436	0.6421	-0.01781	0.5266	-0.525	-0.5001	0.8517
PRKCH	0.05546	-0.6816	-0.17	1.3604	0.7575	-0.3753	0.1446	2.1714	0.002121	-0.5523	5.7812	0.3658	0.1919	1.8598	1.0945	3.0992	2.5126	-0.3321	0.9305	0.4098	8.1865	0.4787	0.2157	0.6348	0.01812	1.2785	2.8151	-0.1061	0.132	2.5965	0.8283	-0.5897	-0.7134	-0.6449	0.3722	2.519	5.1517	2.0579	0.7948	2.4263	5.0876	-0.08985	2.2431	-0.1546	3.3695	5.0976	1.646	1.3815	1.7683
PSRC1	1.5062	0.54	0.6771	1.7984	1.2696	0.6262	0.7809	1.2499	0.6428	0.7826	1.7696	1.1422	1.5773	-2.98	0.5034	3.9388	0.6629	0.5207	-3.0879	1.6806	-0.4657	-0.0868	0.3778	0.429	-0.3476	0.6625	-0.1496	0.922	0.4451	0.3734	0.7534	-1.5049	0.07457	0.23	-2.3987	-0.1489	0.4343	0.4143	1.4568	0.888	-0.3234	-0.6414	-0.06513	-4.6737	0.07403	-0.3013	-1.6027	0.1763	0.5318
RAB21	-0.1866	-0.5665	-0.09296	-0.1951	-0.6145	-0.3679	-0.5343	0.2129	0.6275	-0.1872	-0.00175	0.8821	-0.1118	2.1773	0.4101	2.9709	0.02331	0.3599	0.4922	-0.1933	0.1383	1.7028	-0.2162	0.5502	0.2644	-0.05998	0.2711	-0.7432	-0.1861	1.5373	0.7016	2.6759	-0.3954	-0.2529	4.6227	2.4	-0.7119	-0.2845	0.1538	-1.2726	-0.6822	0.079	-0.4946	0.6137	-0.07463	-0.4843	1.4001	1.453	0.183
ERO1L	-1.1072	-1.2177	-1.0745	-0.4313	-1.4445	-0.5557	-1.7273	-0.95	-0.4365	-1.1503	-1.2424	-0.4816	-0.2694	-1.2202	-1.1286	-3.8925	-0.7256	-0.7655	1.8504	-0.5633	2.307	1.0224	-1.2294	-0.4149	-0.6977	-0.022	0.6739	-0.3096	-0.4815	-1.3242	-1.0348	-0.198	-1.1659	-0.3805	-0.8217	0.7834	-0.3167	0.2239	-1.9926	-0.07934	-0.3069	-1.1991	-0.6987	0.1242	0.5443	2.7208	0.6246	6.4421	0.4535
PSIP1	0.4133	-0.2385	-0.7259	0.8866	-0.3868	0.2107	-0.5574	0.3672	0.0819	-0.2749	0.9632	-0.5121	-2.7568	-0.9086	-0.2275	-3.6778	0.01204	0.7337	-3.4948	-0.4911	0.5888	-3.2734	0.3178	-0.3082	-0.1404	-0.5125	-2.0988	-1.3078	1.3112	-1.5485	-0.4294	0.187	-1.2696	-0.3129	0.7152	-3.4193	0.4085	0.03904	-3.9703	0.7277	-0.3345	-0.1603	-0.1713	-1.8662	0.2163	0.5929	-2.8605	-6.5687	0.9643
APOE	-0.7614	-0.5161	0.2976	0.1492	-0.1369	0.1186	0.6898	-0.6226	-0.6428	-0.3785	-0.2846	0.5346	0.5185	0.595	-1.4171	1.1209	-0.7731	-0.6152	-0.1632	-1.4293	-1.3481	0.3748	-0.2336	-0.6503	-0.4873	-0.2661	-0.3712	0.5584	0.3919	-0.5584	-0.6564	-0.4748	-1.3801	-0.3669	0.4213	0.08119	0.245	-0.2581	0.5145	0.0132	-0.2135	-1.535	0.05044	-2.4883	-0.01956	-0.5559	0.4298	0.3605	-0.6855
CREB1	0.6453	0.4829	-0.01625	-0.3711	0.5365	-0.08889	-0.2749	1.1876	0.5819	0.1713	0.2004	-0.9085	-0.4996	0.1649	1.0767	0.7718	0.4846	-0.05358	0.3741	1.3232	1.2989	-0.3796	0.2138	0.5904	0.5321	0.05996	-0.1317	-0.262	-0.4829	0.8577	-0.8503	0.4056	0.9079	0.1642	-0.7811	0.374	-0.5509	0.1297	-0.2883	-0.8946	0.4345	0.832	0.1593	1.2378	-0.2159	-0.2911	-0.2089	-0.6073	0.9884
MBNL2	-0.8313	-0.2556	0.4794	0.6865	-0.6055	0.001906	-0.3027	1.0413	0.4527	-0.6633	0.4358	0.2085	0.4054	-0.06377	-0.3674	0.5238	0.03559	0.2187	0.5801	0.9	0.7395	-1.0622	0.3329	1.0076	-0.1718	-0.2823	0.3661	-0.2879	-0.08818	0.4365	0.2074	-0.1469	-0.4328	0.09665	0.7461	1.3592	-0.5324	0.01726	-0.01825	-0.6262	0.3991	-0.1413	0.0845	0.7401	1.2194	0.5574	0.8089	0.6893	0.6252
RBM15B	0.6439	0.6632	-0.2733	0.1327	0.6471	0.3874	0.5731	-0.8429	0.1741	-0.1985	0.1271	0.398	0.3312	-1.2327	0.5106	0.0863	0.6902	0.002954	-1.9617	-0.7202	1.2303	0.1558	0.1829	-0.4971	-0.3189	0.4906	-0.4468	0.079	-0.2804	-0.434	-0.02679	-0.1047	0.2552	0.1891	-0.5508	-1.048	0.4815	0.2882	0.1868	0.295	-0.0626	-0.3714	-0.07677	-1.487	-1.6053	0.2348	-1.2343	-0.6913	-0.1745
PACSIN3	-0.1936	-1.0024	-0.4422	-0.6057	-0.3938	-0.8858	-0.365	-0.687	-0.07191	-0.4758	-0.07685	-0.6848	-0.1123	2.1188	-0.3771	3.3059	0.9569	-0.5922	-0.5447	0.1142	4.3214	-0.6492	0.4523	0.3569	1.4771	-2.3956	0.2177	-1.3877	-1.1489	-0.7419	0.4913	-0.7435	-0.2806	-0.8759	3.3216	2.8542	-0.6045	-0.5153	-0.5004	0.3284	3.1872	0.4819	0.5943	-2.1632	0.1698	0.1817	-0.8004	-1.8707	2.6498
TOMM70A	-0.3778	-0.1096	0.1461	1.1092	0.0661	0.8563	0.5015	-0.2557	0.1029	-0.2759	-1.1662	0.8568	0.2594	-1.8197	-1.7267	-0.3602	0.5074	0.8259	-2.1736	0.04434	-1.1224	-0.3298	-0.7578	2.0064	-3.7048	0.06871	-0.3597	-0.836	-0.07263	-2.5932	-0.06513	0.09991	-0.2082	0.06287	-1.8402	-1.7541	-0.1348	-0.1946	-1.1319	-0.7004	0.8007	-0.01219	0.6206	-2.6188	-0.4149	-0.3241	-0.6647	0.06762	-0.8946
CBR1	0.1695	0.5135	-0.1318	-0.5717	-0.2511	0.1638	-0.3438	-0.3413	-0.06063	0.1916	0.1296	0.8767	0.1981	0.1238	1.7589	0.1665	-0.4979	0.7554	-0.5414	0.7988	0.1938	0.2017	-0.605	0.9358	0.8943	0.1339	1.0523	-0.235	-0.4556	0.04619	-0.3521	0.3336	0.3034	-1.1798	1.4141	0.8244	0.1237	-0.5079	0.04721	0.4962	0.8483	0.1179	0.4492	0.4426	-0.6986	-0.5491	0.7847	-0.397	-0.146
MTA1	0.6313	0.0474	1.1053	1.0027	0.799	0.6105	0.6914	1.2221	0.6568	0.01165	1.2181	-0.6284	0.6356	0.5907	-0.547	0.8911	0.8375	-0.1427	0.09599	0.1819	1.1257	0.03885	0.4645	0.022	-0.6783	0.6715	0.0009256	-0.06885	0.8415	0.4334	1.3179	0.7202	-0.1728	0.8654	-1.2233	-0.1762	0.2713	0.3679	0.04388	0.5111	1.0933	0.4392	0.07778	0.2503	0.9789	0.797	0.5353	0.9289	0.2318
MACF1	-3.2159	0.2111	-0.1878	-0.00445	-0.6116	-0.456	-0.3659	-2.3282	-0.2649	-1.0883	-1.1521	-0.6904	-0.8135	0.05195	0.1508	-3.3053	0.8561	0.1917	0.556	-0.3685	2.1726	0.2826	0.3304	0.9048	1.9893	-0.6248	-0.0471	-1.0391	-0.8554	0.6339	-0.1838	-0.5178	-5.0539	-0.08423	0.7078	-0.8647	-0.311	0.1385	-2.651	-0.6997	-1.5201	-0.6341	0.2455	-1.357	0.5829	0.5186	0.3916	-0.08188	-1.2038
PRKCD	2.0746	-0.4913	-1.5033	0.0198	-0.1445	-0.9206	0.4432	-0.3713	-0.2561	-0.8105	-0.7876	-1.1785	-0.7712	0.05762	-1.5857	-1.6693	-1.4787	-1.2425	4.1795	-0.4646	-0.0061	1.6942	-0.5871	-0.1975	1.3591	0.1763	-0.03885	-0.6675	-1.383	-0.1499	-1.1265	-0.8318	-0.0226	-0.2927	0.2859	1.1733	-0.1603	0.2592	-0.9538	-0.3596	-1.1417	-0.1884	-0.5702	5.5523	0.8089	-0.6805	2.1129	0.3997	-0.9013
CCNA1	1.0475	-0.4687	1.0938	-0.3575	-0.4769	1.2773	0.04305	0.4157	1.5384	0.4949	0.1173	-0.5273	1.1252	0.2807	0.4579	3.1802	0.5932	0.3267	1.0743	1.3061	1.4232	-0.3309	0.2648	0.2484	1.1887	0.8489	2.0593	0.1899	0.2303	2.027	1.8332	-0.3337	0.2907	1.3379	1.3664	0.6252	1.4172	-0.555	1.0881	2.0839	-0.4053	-0.2283	0.5484	2.2724	0.6788	0.9487	2.1707	1.9416	1.8779
PIK3R4	0.9919	0.9102	0.03354	0.6364	0.9047	0.3515	-0.5584	0.5595	0.04568	0.07685	0.00355	0.0961	0.9641	-0.8691	-1.3675	-0.2051	0.737	-0.6162	-1.9374	0.1194	0.166	-1.2702	-0.5285	0.2971	-0.7328	-0.0108	-0.06997	0.6361	-0.6082	-3.4368	-0.3066	-0.5739	-0.7817	0.4035	-1.8337	-1.5035	-1.0705	0.7321	-0.3259	0.716	0.54	-0.1353	0.2111	-3.7833	0.8448	-0.7586	2.4853	0.03377	0.4754
CSNK1E	1.8451	-0.34	1.1399	-0.3611	0.3222	0.904	2.0042	0.4915	0.1439	0.2006	1.2546	-2.1753	0.5471	0.9696	0.4165	0.4134	0.2307	-0.1984	1.3958	-0.1443	0.01495	2.0722	0.2812	-0.8621	1.0842	0.3465	-0.177	0.5837	-0.1686	-0.9531	-0.9131	0.5453	0.6966	0.4913	-0.1902	-2.1787	0.2802	-0.2449	-0.8023	-0.5081	-1.8927	-0.5519	0.1421	1.3278	0.05354	-0.2296	1.0295	-0.4883	-0.1201
HIST1H2BK	0.3494	0.6382	0.5656	1.2638	0.7832	-0.4222	0.1549	1.1817	0.4058	0.8604	0.0378	1.6608	0.282	2.2043	1.2172	-1.5511	0.9874	0.881	1.0198	1.0225	0.612	0.4349	-0.8613	0.4831	0.6535	-0.4285	1.4075	-0.5587	-1.0396	1.1946	4.0286	-0.00929	-0.4038	0.3906	0.1589	1.8752	-0.43	-0.4338	0.09209	0.7237	2.3156	1.1293	0.2755	0.3634	0.3909	-0.1506	-0.5114	1.113	-0.6485
JUN	-0.8139	0.6188	2.8325	0.4668	0.9071	-0.02628	0.2038	0.3232	0.09961	0.3286	3.3403	0.2068	-0.2412	3.3987	0.263	0.8475	-0.09119	0.3107	3.2073	-0.333	-0.8827	3.9017	-0.116	1.01	1.2247	0.7722	0.5387	-0.1968	-1.1089	0.3053	2.4407	0.2962	0.2214	0.2341	0.2553	-0.7974	-0.3316	0.1756	-0.0709	1.8395	0.0365	1.025	0.425	3.176	0.8531	0.3682	5.6329	0.7572	1.3062
PCCB	-1.2043	-0.2787	-3.8691	-1.299	0.6015	-0.3445	-1.1733	-0.7011	-0.626	-0.05085	-3.5328	0.5282	-0.3987	-5.8248	-0.9455	-2.6072	-0.3157	0.3859	-3.3877	-0.815	-1.1305	-4.1101	0.7235	-0.5043	-1.1564	-0.3965	-6.1393	-1.0217	0.4405	-1.238	-3.0068	0.5315	-1.7628	-0.3796	-1.4605	2.1847	-0.3388	-1.029	-0.4483	-2.5305	-0.8433	0.3338	0.3058	-3.3741	-0.3904	0.2367	-3.3027	-0.3952	-3.5039
STAP2	-0.4804	-0.5226	-0.2399	0.5246	-0.1179	-0.7253	0.5559	-0.4285	1.1398	0.1975	-1.0135	10	-0.5425	-0.3683	-0.1533	7.8494	-0.06595	-0.1829	0.6443	4.2255	-1.0343	0.776	-0.07525	-0.8108	-0.1506	-0.4729	1.1529	0.05939	0.3099	1.0924	-1.4029	-0.04258	0.2579	1.389	1.6616	-0.3923	-0.2055	-0.2524	0.4334	0.4401	-0.4041	3.6515	-0.05626	-1.5627	-1.2352	-0.5616	-2.1381	-1.0138	-0.2985
TMEM50A	-1.2433	-0.2888	-1.0583	-1.9366	-0.4698	-0.3618	-0.1781	-0.5214	-0.6411	-0.2689	-2.1586	2.1132	-0.4012	0.9042	-1.2771	-3.8834	-2.6412	2.2603	-0.8082	-1.0254	0.5404	-0.7635	-0.5438	-0.6898	-0.9513	1.5949	-0.9792	-0.5418	1.8186	0.2205	-2.8413	-0.1528	0.1691	-0.2335	-0.3186	-1.4171	0.5179	0.54	-0.3854	-0.2542	-0.3427	0.108	-0.5419	-1.4264	0.7821	0.1291	-3.9654	0.6414	0.4712
PMM2	-0.1199	-0.024	-0.07013	0.1231	-1.1651	-0.03591	1.1679	-0.5155	0.3704	0.7244	0.6195	1.004	-0.4562	0.6415	0.1508	1.056	-0.376	0.3317	0.08091	0.2911	-0.5019	0.451	-0.0575	-0.05186	-0.1711	-0.2505	-0.03552	1.1703	-0.7176	0.7422	0.5092	-0.2833	0.8711	0.4809	-0.1984	0.7094	-0.3446	0.1357	0.8322	0.05177	0.1291	0.7945	-0.5267	-0.9928	-0.5757	0.1955	-0.1665	-0.409	0.5639
SCCPDH	0.2796	-0.5577	-0.3826	-1.2524	0.5021	0.1573	-1.0167	-0.04471	-0.1512	-0.9581	-0.2889	-1.7956	0.5374	-0.5745	0.7722	-1.5506	-0.07065	0.0785	0.6675	-0.2528	-0.5295	-1.1148	0.565	0.6056	-0.1356	-0.486	-1.0416	-0.3872	0.1801	0.7255	-0.3053	0.2645	-1.1126	-1.0033	0.6432	1.0715	1.0156	0.07253	-0.4226	-0.002716	-1.3112	-1.0041	-0.122	1.4803	0.2948	-0.318	-1.0276	0.155	0.3273
HSD17B11	-0.9806	-0.07105	0.6778	-1.5338	0.4494	-1.1788	-4.005	-0.8267	-2.5413	0.5466	0.3222	0.2964	-4.6716	-4.8711	0.7719	-0.01365	-0.713	-1.9664	-2.0533	-2.3087	-2.6514	-1.0745	0.2155	-2.551	1.5759	-2.705	0.5179	-3.2309	0.5768	-1.3824	-1.133	-0.9207	-0.3594	-3.7927	-4.5051	0.1286	0.7467	-2.0606	0.3399	-0.7035	-0.4351	-0.01091	0.3325	1.6097	-1.6214	-2.1657	-5.6535	-2.5025	0.3366
TSC22D3	1.2292	-0.06765	-0.2086	0.679	-0.0281	0.5526	0.5306	0.4256	1.2643	-0.7735	0.08695	-0.8158	2.2327	-0.3785	-1.5963	1.5244	0.7014	-0.04264	1.8039	1.0295	1.3038	-1.8369	-0.1915	0.5086	-1.8249	1.1452	-0.5747	1.0275	-0.2017	-1.0308	0.8345	0.4562	-0.4069	2.1956	-0.04388	-0.6722	0.2884	1.1725	0.6182	1.1443	-0.3465	-0.708	-0.6426	-1.5046	-0.6092	0.4387	1.4875	0.9814	0.1051
FBXL12	-2.6052	-0.4039	-0.5208	-0.3582	-0.7501	-0.4152	0.0121	0.08291	-0.7393	-0.3682	-0.6608	-0.0631	0.322	3.1224	-0.9952	3.6787	-0.6339	0.6054	-1.087	0.2616	1.6923	-0.2893	0.1429	0.4077	0.07835	0.0971	-0.5736	-0.1533	2.2133	-0.74	2.369	3.7213	0.2094	0.4204	1.4377	-4.3878	-0.4148	-0.3656	-0.256	-0.3101	-0.253	0.1526	0.2127	1.6319	0.1804	-0.0647	1.6064	0.4007	-0.7765
TFAP2A	0.6923	0.6252	0.7509	0.2105	0.762	1.0131	1.7735	0.5583	0.6843	1.2601	0.7242	0.9663	1.1288	-0.7224	-0.3275	3.0852	0.4585	-0.2901	-1.2677	0.6431	0.556	-0.2055	0.3025	0.2434	-0.5527	0.8478	-0.5783	1.0312	1.2353	-0.2266	1.986	-0.3879	0.0159	0.8181	-0.8444	-0.2717	0.01633	0.3944	0.8939	0.3659	-0.1446	0.1847	-0.6659	-1.997	0.3302	0.4706	-4.7948	1.0475	0.7714
WDR61	0.3542	0.1965	1.0122	-0.4231	1.261	0.2332	1.2472	0.3065	0.03144	-0.07125	0.8889	0.8368	0.8428	0.8827	0.6339	-1.1024	-0.4582	-0.2122	-0.09057	-0.006686	0.7831	-0.2993	0.9253	0.4069	-0.4034	0.9833	-0.1425	0.4175	0.2764	-0.7951	-0.001618	-0.09803	0.3193	0.4507	-1.0353	-0.7776	0.9479	0.6244	1.2432	0.1295	-0.3165	0.4199	-0.008577	-0.283	0.2585	0.7779	-0.2079	-0.2836	0.2203
ZNF395	-0.2963	-0.7967	0.9774	0.4359	-0.2541	1.1659	0.6235	0.1881	0.8069	1.4869	0.6524	-0.7942	0.6383	-0.1002	0.3509	3.8844	0.7033	0.8031	-0.8167	0.9155	-0.7549	1.4691	0.8636	-0.08034	1.8566	0.1418	1.02	1.7818	0.9338	1.7271	0.5479	0.6778	0.3754	0.9431	0.78	0.9883	0.6894	0.245	1.3508	0.3347	-0.6913	-0.8101	-0.3958	-1.5351	-0.9066	1.0775	-1.2736	0.2825	1.53
FAS	0.6994	0.136	1.6758	-0.7908	4.2413	1.4531	-1.0274	3.3607	0.1065	4.5038	4.4477	-0.3429	7.5389	1.6855	-0.1199	4.5838	-0.8672	0.6867	0.2774	-0.1042	1.0296	-0.4799	4.3624	1.2622	-0.01186	3.1392	1.8553	4.0078	0.1718	-0.578	-1.3466	2.5416	2.9157	2.4322	-0.1059	1.2698	1.3974	3.9471	0.1557	1.4436	3.0904	-0.3268	0.1798	0.5461	1.3165	-0.5278	0.06398	0.2907	3.9759
VPS72	-0.1754	-0.4478	1.1415	0.1266	0.5112	1.0367	1.8859	-0.03093	0.6847	-0.1164	0.186	-0.1985	0.623	-0.05422	-0.5338	2.8441	0.4588	-0.3438	-0.3084	0.7806	0.8137	0.8644	-0.365	-0.22	0.07824	0.7814	-0.3857	2.2247	-0.4685	-0.2045	0.882	-0.2991	1.2661	-0.04089	-0.3902	0.8519	0.9751	0.4728	1.6516	0.3872	-0.4178	-0.1486	-0.3673	-0.05758	0.7759	-0.6712	-1.5365	0.5472	0.7275
CENPE	-1.2754	0.357	-0.6153	2.0675	1.6913	-0.05716	1.7439	0.9098	0.9366	0.3475	-0.6323	3.2816	0.7798	-2.9428	-0.4123	0.6656	0.5538	1.1053	-1.823	-0.3436	2.0682	1.7406	0.7776	1.1427	-0.9234	0.7556	0.1133	-0.7062	-1.1257	0.09231	-0.5566	1.4406	-0.2469	-0.8533	1.709	1.5539	0.9384	0.4209	-0.9969	0.4913	-0.1168	2.033	1.2296	-3.3807	1.5873	0.232	-1.0233	0.1166	-0.208
CLSTN1	-0.3306	0.3051	0.3279	-0.8912	-1.7724	0.4507	-0.3917	-1.0136	-0.6439	0.5583	0.0178	-1.1129	-0.688	0.6715	-0.2671	-1.1382	-0.9451	-0.3367	0.1704	0.3621	-1.0673	-1.2947	-2.1715	-0.3451	0.3311	-2.794	0.3041	0.2578	0.1557	-0.8776	0.5007	-0.6802	0.617	-0.2098	-0.006162	0.2931	-0.8282	-0.8624	-0.2784	-0.9086	-0.3387	-0.7588	-0.5843	0.01758	-1.3422	0.5438	-2.105	-0.4002	0.3268
CREG1	0.8779	-0.4173	-0.08553	-0.8653	0.7905	-0.2668	0.7339	0.0773	-0.02978	-0.3634	0.6067	-1.3476	0.5946	1.8043	0.9675	0.1058	0.5089	0.7446	-1.5355	1.2992	-1.0297	-0.122	1.3267	0.02809	-0.2679	0.4544	0.2064	0.2947	0.5614	1.1594	0.4142	-0.3652	0.03101	1.135	1.0722	-0.2995	0.19	0.5199	-0.2551	0.1371	-0.2903	1.3105	-0.04082	1.4811	-0.0484	0.009984	-1.1661	0.5559	0.5754
MAPK9	-0.8724	0.1667	-0.3791	-0.3317	0.225	0.6208	0.1439	-0.4923	-0.112	0.5657	-0.2443	-0.1676	-0.1348	0.8158	0.3212	3.7829	0.1895	0.7026	1.0675	-0.1258	-0.7387	1.3875	-1.0445	-0.2686	0.7011	-0.1606	1.1564	0.2899	0.7907	1.6675	0.03093	-0.112	-0.04483	-0.267	0.8432	1.2254	-0.9819	-0.3138	0.7861	-0.2692	0.3999	-0.5185	-0.5381	0.3628	0.3619	0.2434	1.2835	-0.229	0.2473
PRR7	-0.2053	0.4169	-0.8581	0.5618	0.2495	0.3309	0.5359	-0.3069	-0.05049	-0.9875	0.0236	0.5934	0.08067	-1.8102	-0.1066	1.3286	1.8789	-1.0745	-0.2092	0.07651	-2.8752	-2.0482	-1.2679	-0.5225	-1.5299	-1.2753	0.5559	-1.0722	0.7399	-0.2143	-1.449	0.6355	5.0607	-1.8757	-1.0465	2.3619	1.1246	-0.05383	-1.1304	0.7669	0.8329	-0.6818	0.3383	-2.6582	-0.7129	0.3759	1.6686	-0.06811	-0.8427
SKP1	0.6429	0.6035	-0.118	0.3433	0.4262	0.2389	-0.7467	0.1733	0.6568	-0.0433	-0.3336	1.2472	1.0698	-0.00935	-0.7001	-4.2454	-0.08547	-1.2697	-0.5309	-0.8068	0.4708	-0.7196	-0.6226	0.5911	0.04929	1.0214	-1.7588	0.5657	0.6006	-2.4292	-0.204	0.4737	-0.6196	-0.1066	-1.7497	-0.1481	0.7252	0.7824	0.8881	0.7731	0.241	-0.7683	-0.8577	-0.1119	0.1805	-0.4783	-1.3086	0.6889	0.05823
POP4	1.1949	1.1683	0.6686	0.2713	0.1159	0.4446	-0.7729	-0.05367	0.527	-0.2571	1.0115	0.7786	0.8858	-0.8585	1.3052	-0.3527	0.1846	-0.1065	-0.05948	0.3545	-0.6238	0.3282	0.8081	0.7019	0.1154	0.3748	0.8444	0.5241	-0.1944	-0.9027	0.4181	0.2718	0.3693	-0.09735	-0.6788	1.2353	0.5015	0.005991	0.606	1.0945	0.36	-0.6333	0.1887	-0.4266	-0.06305	-0.8206	0.8672	-0.3915	-0.1359
TMEM110	-0.6043	-0.7375	-0.2326	0.2506	0.1159	-0.6543	-1.005	0.2251	-0.4656	-0.339	-1.1587	-1.2438	-0.2885	-0.9357	-0.353	4.9379	3.485	0.3937	-0.3987	-0.8598	-0.7379	0.2052	0.00295	0.2499	1.303	-0.4078	-0.09799	-0.7093	0.4742	1.1623	-0.4108	-0.2005	1.5978	-0.1261	2.1926	1.0133	-0.3438	-0.7937	-0.2754	-0.9859	0.4067	0.5558	0.3639	-0.0849	2.5305	0.4669	2.0904	-0.8388	0.05296
NFE2L2	3.5529	0.7877	1.4752	1.6723	0.4874	1.2354	0.3423	0.486	0.7342	0.4995	1.4504	0.7242	1.4667	-0.1647	2.0002	3.1352	1.6593	1.6167	0.361	1.0234	-0.4929	0.928	1.3512	1.0783	0.3922	0.8551	1.1163	0.796	1.3838	2.3385	1.7241	1.3776	0.3462	0.8338	0.5252	0.5814	-0.3353	-0.2181	0.8157	0.8613	1.003	0.3722	0.7169	1.7367	0.5878	-0.05926	-0.3189	-0.6449	-0.1305
ZNF589	0.4009	-0.3243	0.6858	-0.1421	1.0256	-0.5372	0.1136	-0.2256	0.1716	1.3743	0.5827	0	0.2926	4.1785	0.5746	3.9037	1.1258	1.0324	-1.2852	0.4832	3.3967	1.035	3.1578	-0.1537	0.7958	-0.2931	0.511	1.5816	0.5313	1.2741	1.6375	1.9688	-0.3719	-0.6843	4.8858	1.1181	-0.4766	0.03964	1.1369	-0.7262	3.6495	0.08856	0.3811	-1.1314	1.6332	2.1556	0.8803	1.8272	0.266
BAX	-0.2839	-0.6423	-0.2569	-0.3321	0.2827	0.2796	-0.7923	-0.05639	-0.1218	-0.5434	-0.538	-0.6422	0.6379	0.8157	-0.6489	1.2422	0.3904	-0.03728	-0.1878	0.2319	0.0211	0.8955	0.178	-0.2143	0.1888	0.2415	0.3841	-0.5439	-0.1933	-0.1812	0.04205	0.8908	-0.9908	0.09022	-0.613	0.5186	-0.3152	-0.3534	-1.6447	-0.4529	-0.7833	0.1029	-0.2597	-0.1645	0.402	-0.4165	0.4446	-0.6225	0.2528
BLCAP	-0.3195	-0.5089	-0.9713	-1.0747	-0.9157	-0.998	0.5175	-0.6371	-0.7083	-0.4107	-0.7538	-0.1588	-1.0661	0.8496	0.4574	-0.6497	-1.0173	0.02162	0.7508	-0.6737	-0.488	-0.2061	0.1336	0.07851	0.5669	-0.5402	-0.4078	-0.4422	0.5451	1.4088	-0.9006	-1.0722	0.1259	-1.0354	0.7412	0.2206	-0.0424	-0.3915	-0.1021	-0.259	-0.8043	0.104	-0.01263	0.7125	-0.3898	0.5166	0.3636	0.1244	-0.5357
CNDP2	-2.0507	-0.08765	-0.8129	-0.8183	0.24	-0.8737	1.0218	0.2623	-1.1869	-0.4992	-0.7858	-0.3749	-0.5135	-1.9258	-1.4128	-2.2354	0.524	0.08255	0.4678	-0.144	0.3503	-1.4465	-0.0999	-0.9116	-0.4403	0.7577	0.5754	-0.7514	0.2175	-0.5963	-1.0645	0.2561	-0.4213	0.4191	1.0982	-4.5691	0.6688	-0.2058	-0.7626	-0.4152	0.3807	1.2439	0.1013	-0.8195	0.895	0.05797	-1.6934	0.9007	0.3683
FAM20B	-0.006474	-0.8618	-0.4191	0.3266	0.2144	0.001025	0.2436	0.4918	0.7457	-1.5928	-0.6136	0.8734	0.1012	0.7478	-0.571	3.3451	-0.06314	-1.1414	0.2146	-0.6209	-1.6636	2.1964	-1.0287	0.7795	-0.2606	-0.7793	0.1201	-0.3689	0.06048	-0.4861	0.5279	-0.04611	-0.5697	0.4242	-0.2147	0.6608	-1.0105	-0.1214	0.01722	-0.2723	-0.5419	-0.4074	0.6079	-1.151	-0.1384	-1.1801	0.3334	-0.9565	0.11
PROS1	6.1651	-0.6906	-0.9762	4.0229	-0.5337	6.5427	-0.6906	5.6439	4.1771	-1.0042	-0.9196	-0.0195	1.8673	-0.7786	-1.7582	1.2215	-0.3956	-1.5998	-0.9112	2.1638	3.8793	5.1434	-0.4174	1.754	2.4666	1.4163	2.651	1.6681	-0.4904	1.6068	-0.8413	2.3765	4.1812	6.8475	3.2758	4.5656	-0.7975	0.5823	3.1451	2.8906	-1.2462	1.9	2.2677	-0.07782	3.0958	2.2826	-0.1006	6.6791	-0.5019
TNIP1	-6.4006	-0.185	0.02927	-5.0993	-0.018	-7.5662	0.3694	-5.9834	-4.467	-0.1867	0.5082	0.5184	-3.8181	1.5624	0.147	-2.1386	0.6577	0.5593	4.2311	-2.7281	-4.6542	-4.5105	0.0384	-1.8963	-4.1285	-2.2269	-1.5705	-2.591	-0.2078	-1.8479	-0.5675	-3.4114	-4.8142	-7.069	-3.7026	-4.5427	-0.4651	-0.8082	-3.411	-3.3135	-0.08005	-1.4323	-2.967	0.7904	-3.5898	-1.5393	-1.8465	-6.3195	-0.399
CRKL	0.6374	0.5735	0.6402	0.4513	0.3662	0.9092	0.3602	1.3205	0.008385	0.8941	1.1444	0.6313	0.3734	1.3037	2.8935	3.5199	1.2043	1.3781	0.2399	1.1278	-1.972	1.0689	1.0938	-0.8819	1.7162	-0.1488	0.8449	1.467	1.0114	2.0181	2.4095	0.4506	0.8507	0.8154	1.2329	1.3468	0.6365	-0.1622	1.3512	1.4128	1.2337	1.3602	0.09486	1.1029	0.03261	0.6367	1.1403	-0.2741	0.3211
P4HTM	0.4567	-0.0573	0.0245	-0.5742	-1.3156	0.3006	-0.455	-1.065	-0.3516	-0.4398	0.5986	0.7812	0.1415	0.08017	-1.5063	-2.5267	-0.9672	0.8708	-1.9476	-0.01882	4.0889	-2.686	-0.00455	0.929	0.6648	-0.03835	-2.1186	-0.4372	2.1314	-1.4443	-2.0354	0.1792	-0.2623	-0.2386	0.9219	-0.09102	-0.5683	-0.02552	-1.8848	-0.3865	-0.2075	-0.3969	-0.4295	-1.0558	-0.8726	0.7378	-2.6721	0.625	-0.03249
REEP5	1.0587	0.4123	0.406	0.4905	-0.184	0.6705	-0.095	0.812	-0.4246	-0.252	0.6878	-0.605	0.3827	-0.5114	-0.1769	-1.9712	-0.5517	-3.924	1.7292	-0.3152	1.9312	0.9181	-1.2429	-0.3146	-1.2499	0.3095	0.204	-2.8427	-1.3763	-0.7363	0.3026	-0.4076	0.8922	0.3267	-3.2027	-1.5466	-0.3165	0.08208	-0.6427	0.3193	-0.08685	-1.3742	-0.6934	-0.1958	0.8651	0.08297	1.4295	0.717	0.5987
ZNF318	0.7114	-0.3048	-0.2256	0.9046	-0.1804	0.4864	-1.405	-0.3749	-0.1218	-0.7025	-1.1382	0	-0.5755	-2.7188	-1.664	2.8772	-1.391	-0.7755	0.6194	-1.0622	-1.7767	-1.3097	-0.4665	-0.2205	1.7058	-0.1235	-1.0854	0.04654	-0.6718	0.2136	-0.9604	-1.3012	-1.4545	0.1019	3.449	0.4361	-1.4243	0.1152	-2.1791	-0.644	-1.648	-0.347	-0.0892	2.252	0.1317	-0.1325	1.6998	-1.2764	-0.4424
BZW2	0.1721	0.4293	1.1796	1.3662	0.8456	3.3244	0.4716	2.8281	1.2138	0.462	0.6835	1.0147	0.3319	0.02173	1.4671	1.0503	1.236	-0.1952	-0.367	-0.5069	0.56	2.2014	-0.1371	-1.0447	-1.109	3.488	0.6771	-0.08808	-1.8246	-0.4247	2.4053	0.07261	0.8999	2.926	4.1323	-0.7599	-0.05343	-0.3097	-0.05875	0.4755	-0.2481	0.9755	0.8286	1.7584	2.4194	-0.09991	1.5491	-0.1865	-0.02252
FDFT1	-0.5743	0.9405	0.5881	0.4626	0.4691	0.7287	-0.373	-1.2871	0.8311	0.4413	0.1963	-0.2702	0.4629	-0.6161	0.2775	-3.4973	-1.0186	0.2483	-2.0495	0.06119	-0.8024	-3.871	-0.3079	-0.3055	-2.4932	-2.4692	-0.1878	-0.1108	-1.3184	-2.124	0.2583	0.882	-0.7229	0.4923	-4.5259	-2.7247	0.3957	0.5696	0.848	0.6631	0.5623	0.3481	-0.8964	-3.1968	-1.9638	-0.3383	1.7652	0.4151	-0.108
CGRRF1	-0.09819	0.7002	-0.1484	-0.2982	-0.202	0.1339	0.4142	0.4596	0.9228	1.4642	-0.2914	-1.1164	0.1945	-0.6706	0.4456	0.3372	0.2501	-0.2027	-0.0708	-0.222	1.3013	-0.4763	1.5366	0.1795	-0.8705	0.8779	-0.06546	0.2923	0.648	1.3922	-0.3254	1.0436	0.4497	1.9035	-0.8973	1.8211	-0.253	0.8763	-0.8107	0.1903	1.8868	0.3032	-0.3895	-0.1827	-0.5029	-0.7838	-0.6962	0.924	0.0321
TRAP1	0.9077	0.2927	0.383	0.9369	0.4683	-0.5765	-0.3677	-0.08032	-0.3127	-1.184	0.4927	0.4873	0.9379	-1.2491	-0.2229	0.9304	1.3252	-0.07187	-2.1165	0.215	-1.6339	0.164	-0.937	-0.8779	-0.1804	0.4187	0.2766	0.2706	-1.0173	-1.6376	6.02e-05	-0.4759	1.2081	-0.6922	2.2396	1.2666	0.2437	-0.3822	0.01027	-0.3627	-0.7263	-0.2061	0.246	-2.7159	0.2016	0.06868	0.2163	0.2538	-0.7078
AMDHD2	-0.983	-1.1948	-0.6999	0.6576	-0.9445	-0.6327	-0.7821	-0.3787	0.9936	-1.0077	-1.7113	-1.7359	-0.5591	-1.1395	0.4159	-2.9802	-0.06346	-0.3244	2.1653	0.2139	-1.1572	1.0941	0.1232	2.8836	0.12	-0.4307	0.4146	-0.6651	-0.2877	1.6705	3.5796	-0.61	-1.0321	-0.4397	5.588	2.1858	-0.3447	-0.8129	-0.9378	-0.2386	-0.6503	-0.09305	0.7986	1.5948	-2.5049	-0.4162	2.5071	-0.9794	-1.1476
GTF2A2	0.6267	1.1327	0.4989	1.2614	0.9747	0.4102	-0.5905	0.7283	0.7182	0.2084	1.3328	-0.0778	1.3354	0.084	1.312	-1.6275	1.6745	-0.4564	-1.1173	0.4358	-0.6483	-0.0951	0.1635	0.008394	-0.384	-0.09668	0.7667	0.7792	0.2674	-0.2398	0.4899	0.8565	0.456	-0.1885	-2.6492	-3.0106	0.1287	0.06203	1.3732	0.9475	1.3604	-0.02827	0.1062	-0.6906	-0.8448	-0.5586	0.06454	-0.5596	0.1134
PEX11A	-0.5318	5.6179	4.2813	5.0881	0.4911	-0.1474	-1.0782	3.1308	-0.1774	0.1475	5.4338	10	3.3472	2.2597	0.3432	2.9415	0.6215	0.2302	-1.2159	3.1109	5.3679	-0.0948	0.8709	2.2662	3.5536	-1.892	0.7304	2.4034	2.985	-1.0633	-0.3098	0.2357	0.8964	2.488	-0.357	-0.8697	2.9461	-0.5973	2.5621	10	4.465	3.7373	-0.3215	-0.5377	-0.7317	0.06294	0.2636	3.7602	6.6297
PSMD9	-0.006265	-0.2311	-0.6273	-0.5098	0.01165	-0.5255	-1.015	-0.06935	-0.5349	-1.1948	-0.5039	0.1215	0.2917	-0.9834	-0.7328	-2.2062	0.09784	1.2315	1.3367	0.4892	-0.1644	1.1646	0.779	0.1993	-0.5802	-0.8121	0.4003	-0.762	-1.4407	-0.3706	-1.1274	0.3385	-0.3361	-0.6584	0.02751	0.5471	-0.8006	-0.2847	-0.9719	0.5304	0.366	0.07169	1.1289	-0.5351	-0.006363	-0.3	-0.02287	0.537	0.3881
GFOD1	2.8487	-0.713	-0.7027	0.7725	-0.09785	2.8759	0.2	2.8288	1.2205	0.7581	0.2849	-0.8007	-0.5442	-0.4497	0.2303	3.1735	0.4586	0.5941	0.6517	0.4274	-1.1362	-0.1099	3.9111	1.8992	-0.126	1.7933	-0.1449	0.03824	2.1988	-0.01694	1.0184	-0.7322	4.2245	-0.7527	0.712	0.1862	-0.1864	0.01101	0.1519	2.2454	-1.5998	-0.7034	-0.4963	-0.9787	-0.1012	5.7695	0.2963	4.6407	6.6888
MTFR1	0.04028	-0.1614	-0.277	0.321	0.3284	-1.4288	-0.03095	0.06291	0.4045	-0.1435	-0.0922	-0.3321	0.05543	0.1623	1.348	3.3706	0.9014	-0.2655	-0.629	0.4837	-0.4546	0.4862	0.07225	-0.6201	0.3365	-0.01673	0.6562	0.9024	-0.3366	0.3559	0.91	0.6242	-0.8538	0.1872	-0.5574	2.652	0.07355	-0.02107	1.4292	0.8628	0.5994	0.08738	0.1416	-0.8893	-0.4253	-1.2058	1.2513	-1.546	1.0583
PECR	-1.3525	1.2779	0.9254	0.5407	0.8063	-0.65	-0.4038	-0.5651	1.2591	-0.4727	4.7587	-1.3419	1.1019	-0.2828	-1.0035	3.0912	-0.6636	-0.9899	-1.4924	0.684	5.0191	-0.8685	-2.2822	0.9252	-1.8344	0.2259	0.2758	1.2057	1.6632	-1.3027	-1.2351	0.6982	0.494	-0.6347	-0.3768	6.2377	0.8844	0.07401	-0.7875	-0.01485	0.6148	-0.9689	-0.003991	-3.2274	-0.4111	-1.2179	1.4206	-0.1029	-1.027
UBE2A	-1.775	0.3873	-1.0695	-1.1296	-0.7071	-0.4885	-1.1653	0.1374	0.4987	-0.5336	-0.8294	-0.6963	-1.2295	0.7789	-0.6059	-3.5246	-1.0113	-0.1349	0.4554	-0.2275	-2.0952	-0.6659	-0.517	0.8067	0.6022	-0.4312	-0.6214	-1.0121	0.03202	-0.5848	-0.991	0.6428	-0.9792	-1.9814	-0.9939	0.956	0.4185	-0.01442	-0.2173	0.04029	-0.04425	-0.3646	0.4146	1.2195	-0.01755	0.2974	-0.3197	-1.078	-0.6063
NIT1	-0.1927	-0.3651	0.1701	-0.0468	-0.0914	0.1084	1.3798	0.4666	0.007635	1.2009	1.5331	0.1986	0.402	0.6917	0.1359	2.9513	0.0947	1.1775	3.5469	0.5623	-0.4403	1.0415	0.8229	0.1659	2.1362	0.3721	0.8713	1.3766	0.3206	1.4466	1.1509	0.4242	0.2947	-0.05225	-0.08218	-1.7853	0.5456	0.04036	1.0035	0.08164	-0.4515	0.3157	-0.2011	2.4145	-0.1669	0.006055	1.5405	-0.009372	0.6909
SOCS2	0.1527	-1.0551	-0.8619	0.0154	-0.0671	-0.1492	0.2075	0.5271	0.05609	0.454	-0.2502	-0.5299	0.4843	1.4299	1.3047	3.5626	0.2634	0.536	3.3468	-0.2269	-1.6897	0.2781	0.5132	-0.7469	-1.2828	0.1408	0.3809	4.0772	-0.1272	1.9286	1.0053	-0.08863	0.7736	-0.5284	0.9479	-0.7688	0.437	-0.6617	1.747	-0.9	0.6288	0.132	-0.1827	-1.068	-0.9063	-0.3535	1.484	-1.1237	3.3029
SYNGR3	0.3461	-0.0063	3.499	-0.5071	-0.1755	1.9619	-1.4003	-0.1835	0.5483	0.0645	-0.457	-1.0375	5.6846	-0.2576	0.4656	3.9786	2.6675	0.6969	1.7332	0.6019	-0.04185	1.3914	-0.7556	1.8467	0.2579	-0.3719	0.05446	3.3348	3.384	-0.2661	1.0235	2.8276	4.8051	-0.6219	0.3227	2.7558	4.6575	-0.7979	2.3875	0.3678	2.5599	0.1872	0.9021	0.1013	-0.6778	0.1642	5.4449	-1.5141	-0.8265
ZDHHC6	0.1038	0.538	-3.8733	-0.6328	-0.3248	-3.0476	-1.2344	0.04552	-0.3	-1.0622	0.067	0.1867	-6.3441	0.8704	0.3956	-5.4138	-3.3705	-2.2093	1.0103	-0.9673	-0.5995	0.4442	0.7365	-1.0697	-0.27	-0.7604	0.3312	-3.1723	-4.59	-0.9487	1.5936	-3.455	-5.0743	-0.8808	-1.6789	-3.9411	-3.4924	-0.03839	-3.7655	0.682	0.2249	-0.2934	0.2881	-0.2171	-0.7657	0.2918	-4.873	-0.2145	-0.8481
ITGAE	0.4092	0.6487	0.8809	0.6741	0.5299	0.06724	-0.2425	0.9508	0.209	0.5965	1.37	0.2281	0.9193	-0.5332	1.6601	1.5511	1.1876	-0.4442	-0.9588	0.5198	-5.6007	-0.03085	0.2438	0.4069	1.0514	-1.2048	0.3561	0.4761	-0.375	0.5663	0.9538	0.4783	0.28	-0.1704	-1.9966	-2.6734	0.305	-2.1457	1.1409	-2.6265	0.8615	0.4143	0.2159	0.3145	-0.7238	-0.02623	-4.1532	-0.8469	-0.01345
NFKB2	0.2847	-0.1049	-0.9438	-1.2308	0.4777	-1.399	-0.4647	-1.1394	0.1107	-0.911	-0.6159	-0.1048	-1.3578	-0.3491	-1.8033	3.2733	-1.4828	-0.6259	-0.8681	-0.2427	4.3548	0.3723	0.2109	-0.5269	-0.7216	-1.5919	-0.5113	-1.3427	-1.9384	-0.1608	-0.7466	-1.3379	-1.2937	-0.0619	0.2752	2.3494	-1.2017	2.3467	-1.3576	3.1616	0.4223	-0.2218	-1.1192	-0.3311	-0.08671	0.1381	5.1347	0.8532	-1.1869
STK25	-1.2567	0.2883	0.9402	-0.6637	1.2164	-2.7555	0.3076	0.4569	0.5308	0.4809	1.5192	-10	0.1076	1.5685	0.0452	0.935	1.9592	0.4691	-0.4144	0.5959	-6.0222	0.0172	0.7652	-0.696	-1.722	-0.5561	0.0259	0.1923	-0.6433	-0.8194	-0.125	0.5558	-0.6418	0.2677	-1.0736	-0.7206	1.0852	0.2684	-0.1307	0.3017	-0.7794	0.01535	0.3579	-2.6237	0.7047	1.5885	-0.08985	-0.2255	0.704
TMEM5	0.1698	-0.1262	-0.6809	-0.2723	-0.1804	1.3771	-2.2377	-0.2205	-0.5821	-0.2482	-0.7286	10	-0.3575	-0.8639	1.2635	-2.1586	0.832	-0.7704	-2.1966	-1.05	4.3987	-1.2393	0.5837	-0.6051	-0.5236	-0.8874	0.4391	-0.6749	-0.7696	0.4791	-1.2026	-0.6672	-1.4499	0.14	0.7769	-0.28	-0.09508	0.275	-0.9443	-0.2054	0.2105	0.6788	0.5844	-0.5175	-0.1761	-1.2933	1.7068	1.998	-0.2451
ABCF3	0.02962	0.331	-0.7089	0.8067	-0.7484	-0.2775	-0.2942	0.6363	-0.1171	-0.07245	-0.953	-3.1698	0.7446	-0.4935	-0.5424	-1.6	0.1629	-1.0219	-0.8783	0.4334	0.0699	0.295	0.4833	0.8606	0.1136	-0.9022	-1.2985	-0.4415	-0.3226	-1.0339	-0.899	-0.2569	-2.2734	0.1883	0.2486	2.5607	0.05369	-0.2312	0.212	-0.9205	0.2984	0.2174	-0.2159	-0.4778	-0.4185	0.238	0.06034	0.6146	0.438
ATP5S	0.1885	-0.4457	0.5203	0.6853	0.8055	0.276	0.5723	0.04493	0.2141	-0.7556	0.521	2.7048	1.3252	-0.1171	0.73	-1.047	-0.5103	0.2449	-0.201	-0.7675	0.6996	-0.847	-0.1743	0.2575	-0.5986	1.2696	-0.4152	-0.04086	-0.9533	0.05015	0.04462	0.9032	1.5548	-0.3417	-0.9093	-1.0914	0.2914	0.3085	-0.5217	1.1768	0.2636	-0.2779	0.6511	0.4465	0.431	-0.6297	-0.8919	-0.6745	-0.5084
FCHO1	1.7768	-1.3438	-0.06546	1.9585	0.149	-0.1236	-0.1281	0.8153	1.0257	0.1144	0.1605	-0.6046	-0.8479	0.1248	0.5579	1.8904	0.4285	0.6134	0.741	0.2306	-0.0356	0.3243	-0.5639	0.6583	1.5356	0.7878	0.1984	0.9768	0.2331	1.2955	1.0328	0.1139	-1.0135	1.2536	0.06716	0.03561	0.7599	0.1745	1.5287	0.5926	0.01845	0.002775	0.04858	1.4324	1.2675	1.0028	0.6682	0.6177	0.3773
NGRN	-1.221	0.7803	-0.5524	-1.3731	-0.2905	0.5386	-0.7506	-0.8025	-0.8832	0.2051	0.07565	0.4724	0.7844	0.4115	-0.8651	-0.1503	-0.3679	-0.3764	-0.7182	-0.5818	0.09065	0.2046	0.8704	-0.7002	-0.9192	-0.7959	-0.567	-0.5751	-0.7728	-1.0944	-1.6864	0.08898	0.5836	-0.7681	0.294	-0.9644	-1.9847	0.1745	-1.0946	0.02764	-0.063	0.08328	-0.1314	-1.2279	-0.6652	-1.5233	-1.0037	-0.3903	-0.6884
HOXA5	-2.477	0.5132	-0.4249	-2.1035	-2.1957	0.006456	-0.0394	-0.4333	-0.8183	-1.0341	-0.5825	0.2991	-1.0068	-1.8189	-1.6066	-0.4619	1.277	-0.8028	-0.8616	-1.7898	-3.68	-1.15	-1.8244	-0.6182	0.1228	-1.443	-1.7564	-1.2738	1.0507	-2.5992	-1.1972	0.6168	-0.2497	-0.01912	-2.3145	-0.06156	0.3279	0.05451	-0.6861	-0.8052	-0.4995	-1.6205	0.1289	0.1106	0.7208	-1.1214	-1.7837	-1.2089	0.1125
OXSR1	1.1517	0.4534	0.362	2.687	1.4345	1.1215	0.2661	1.0504	1.254	0.6665	0.8298	0.4338	1.3046	0.8496	1.2379	-2.012	-0.1067	0.4032	0.9512	1.0946	0.893	0.04125	0.2427	0.8012	-1.3218	1.6407	1.233	1.1354	-0.3309	0.2476	0.3809	-0.172	0.4143	-0.157	0.7427	-0.3978	0.398	0.5894	0.8476	2.2082	0.6032	0.762	-0.4475	-0.7299	0.5663	2.3129	-0.8339	1.5419	0.5521
GRN	-1.0604	-0.4884	-0.5354	-0.5771	-0.2266	-0.06559	0.6729	-0.4126	-1.6348	-0.7725	-1.2832	-0.0536	-2.6148	-0.8406	-0.3064	-4.5278	-1.0114	1.7213	1.5952	0.3155	-2.1806	-0.5185	0.6418	-0.1424	0.2613	0.7356	-0.459	0.02241	-0.09696	-0.6883	-0.4867	-0.04203	-3.669	-0.8446	-3.7959	0.523	-0.5232	-0.6761	-0.4925	-0.1104	-0.4024	-0.1574	-1.0387	-0.73	-0.5566	0.4874	-1.927	0.0976	-3.1614
SMARCC1	-0.2165	-0.8954	-0.7477	-0.2425	-0.6206	-0.2519	-1.3479	-0.02125	0.05697	0.5168	0.8688	-0.5241	-0.6718	-1.4161	-1.104	-0.8811	0.6588	0.04947	-2.4254	-0.3063	2.7961	-2.0961	0.0853	-0.1712	-0.977	-1.1739	-1.2004	-0.4219	0.4039	-2.0652	-0.8826	0.5102	0.696	0.1316	2.0662	-0.9026	-0.1468	0.5083	-0.4822	-0.6368	-0.9098	-0.03003	0.3037	-0.8114	0.9346	0.3153	-2.3719	-0.2107	1.1452
NUP85	-1.1257	-0.699	-3.4491	-0.168	-1.4009	-2.3134	-1.0091	-3.9909	-2.4034	-0.0658	-1.0705	0.0706	-0.741	-3.3028	-0.1725	-3.6993	-0.347	-0.2317	0.008532	-2.9629	-4.9605	-0.6126	-0.4189	-0.7267	-2.9087	-2.4369	0.3158	-3.3806	0.3518	-2.3876	-2.4171	-0.07703	-0.1334	-2.9815	-3.678	-2.2943	-0.1057	-2.3519	-3.5121	-0.4728	-0.5188	-2.6563	0.8214	-3.8768	-0.1991	0.05642	0.02373	-2.3217	-0.2213
PAK6	-0.3171	-1.3924	2.821	-0.03115	0.2562	3.2388	1.5871	0.01534	1.6522	0.1287	-0.8546	-0.3844	1.2427	1.2163	-0.9706	2.285	0.6131	0.3756	0.9068	1.1168	2.5736	1.8694	0.8898	0.6922	1.4207	0.8575	-0.2018	1.345	-0.02025	2.7001	2.2699	-0.6605	-0.1648	1.9039	2.7031	1.2813	-1.1333	1.0648	0.03784	1.5472	0.1312	2.1002	1.0836	1.5749	0.0694	-0.1757	1.7298	1.696	-0.5768
GHR	-0.4359	1.0489	0.8335	0.9408	-0.3659	-0.6098	0.1537	-1.0473	0.1579	-0.482	-0.4827	3.4129	-0.5633	-0.1621	0.0408	3.7565	-0.9733	-0.1603	-0.5229	0.9989	0.2005	0.3709	-1.0171	0.435	0.8209	1.3538	0.7093	-0.2669	1.7267	0.3535	-0.06412	0.6642	-0.08439	-0.8365	-0.1066	0.5336	1.6813	-0.1991	0.9588	-0.5778	1.1781	0.4494	-1.4222	0.9897	-0.4321	-0.0632	1.7082	0.4685	-0.1003
GTPBP8	0.01401	1.2708	0.1877	-0.93	0.4683	-0.1274	-0.0478	0.1062	-0.2057	-0.4389	-0.269	-4.3029	0.6912	-0.1055	0.639	-3.8566	-0.3962	-0.4328	-0.7841	-1.2038	-0.2982	-0.5131	0.1475	-0.8492	-0.1863	-0.5633	-1.0904	0.1019	-2.0955	0.2569	-0.8405	-0.09215	0.3151	-0.4097	0.06983	-0.2984	-0.6697	0.1967	0.7113	0.6302	0.7269	0.08095	0.3928	-1.3279	0.6295	0.09	2.0976	0.9378	0.7543
GLOD4	-0.4684	-0.3057	-1.1238	0.7592	0.2278	-0.1496	-1.3399	-1.1292	-0.8917	-1.4593	-0.269	0.3788	0.7079	0.3466	-0.7444	-3.9247	-0.4706	-0.3477	0.02234	-0.1756	-1.3389	0.1003	0.3455	-0.3961	-0.09804	-0.5871	-0.4302	0.3151	-0.3004	-1.4669	-1.0253	-0.4671	-1.5179	0.5089	-0.4448	0.2163	-0.3869	-0.6538	-0.1679	0.4088	-0.3778	-1.2187	-0.1041	0.4135	-0.4011	-0.003873	-1.4116	-0.7699	-0.1151
PTK2	-1.0961	0.5852	1.1185	-0.1548	-0.5785	0.1017	-0.08585	1.0033	0.8132	0.3183	0.7977	-0.3442	-0.527	0.2531	0.2398	0.1581	-0.2297	0.2139	0.6453	0.6461	0.2498	-0.5039	-0.5653	0.7184	0.2582	1.7025	0.1569	-0.5888	0.7925	0.8368	0.7183	1.1014	1.1238	-0.2314	-0.126	1.4175	0.8369	0.4255	-0.4107	0.4223	0.7673	0.9889	-0.2331	0.09255	0.6641	-0.1709	2.0361	0.9403	0.2947
CDK4	0.9942	-0.4081	-0.5518	-0.3836	1.0355	-0.2548	-0.9123	0.7172	-0.1726	-0.6093	-0.5246	0	-0.4653	-0.8374	-0.028	-3.089	0.7999	-0.4675	-1.9075	-0.6965	-0.5864	-1.8998	0.8408	-1.1273	-0.7684	-0.6803	-0.4969	-1.4387	1.1177	-0.8407	-1.5004	0.3895	-0.01534	-0.2404	-1.2604	-0.339	-0.695	-0.5624	-1.0058	0.3499	0.4219	0.5305	1.3749	-0.8301	-4.5361	0.4011	0.3843	-0.6705	0.3016
EPN2	-1.5878	-0.5257	-0.2984	-1.4137	4.6002	-0.4842	0.3033	-0.2569	-0.03271	0.2728	5.161	-0.407	-0.4785	1.4334	0.6442	3.3755	0.1642	2.3333	2.2037	0.765	4.6628	0.9592	0.02955	0.183	3.4619	-0.5273	0.6738	-0.708	-0.2815	3.7916	0.1263	-0.3431	-0.7579	0.4061	1.0913	1.1194	-0.4696	1.5405	0.648	-0.6188	-0.5462	0.1673	2.6825	3.9005	-0.3839	-0.2791	2.5702	-1.5828	0.1215
CCDC90A	-1.601	0.8366	-1.2812	-0.3504	-0.8521	-0.06408	0.3458	0.3222	-0.3195	-0.7875	-0.7588	-1.8873	-0.5521	-0.485	-0.5301	-0.1253	-0.1736	-0.8228	-0.0202	0.2228	0.4098	-0.2638	-0.4473	-0.06212	-0.8815	-1.1293	-0.2169	-1.333	-0.06105	-0.9943	-0.3426	0.3991	-1.5445	-0.4667	-0.09903	-1.287	-0.9557	-0.5916	-1.1394	-1.0403	0.09525	-0.3796	-0.002068	-0.1069	-1.1454	-0.6483	0.3487	-0.2035	-0.721
IL4R	1.0282	-0.9482	0.7564	0.6343	0.2009	0.1716	0.28	-0.07587	0.3577	0.5448	0.6849	2.9532	1.2252	0.958	0.4666	1.3431	0.674	1.072	1.0162	0.2533	-0.8582	1.0096	-0.24	-0.03188	1.0217	0.8579	-0.577	0.9214	-0.3387	1.6853	0.5318	0.2265	1.1528	0.5483	0.2781	1.3795	0.5826	-0.01662	1.3073	1.2413	-0.2585	-0.03818	-0.2461	1.2364	0.4343	-0.4373	-0.9219	-0.6327	0.1829
KIAA0528	-1.2524	-0.01985	-0.4646	0.469	0.02985	-0.1311	-6.3285	0.05096	-0.2085	-0.4712	1.0488	-0.4827	-0.01701	-2.2148	-5.4415	-3.045	-3.8638	1.1575	-4.4896	-0.2662	-4.9861	-1.7444	0.153	-0.9341	-0.07228	0.7941	-0.9202	0.1341	1.721	0.4113	-0.03486	-0.2007	-0.2949	0.3286	1.7104	1.4696	0.1069	-1.5655	-0.5802	-0.4348	-0.05515	-0.3296	0.5856	-2.8032	-0.2238	-0.2501	-3.556	-0.1322	0.3792
PRKAG2	-0.8565	1.1951	0.5647	0.3801	0.2402	-0.2616	0.3927	0.4287	0.5252	1.132	0.09775	-2.0686	0.3565	-0.9337	5.2979	1.1976	2.8658	-1.2473	0.9913	0.0393	0.7016	-0.1804	-0.3279	0.2789	-1.1971	-0.6106	-0.4772	-0.2776	-0.7509	-0.1696	1.8043	0.5285	1.2435	0.7372	0.0245	2.0903	-0.6844	0.2398	-0.105	0.3063	0.4026	0.429	0.1398	-3.3445	0.1653	-0.5276	0.8023	-0.9346	-1.7363
KIT	-0.6354	-1.5324	3.7809	5.1039	-1.5875	-0.6056	-0.7889	0.2645	0.209	0.131	-2.033	9.0461	3.2885	-1.2644	-0.0731	3.0883	-0.4771	-0.186	0.3418	0.7876	0.3018	0.1668	1.0065	0.5929	0.3374	1.1482	2.5213	0.3546	-0.005129	0.4756	3.4233	-0.08194	3.7119	0.4038	-0.3721	-0.1489	-0.6614	2.671	1.8709	-0.9774	-1.1162	-0.5962	-0.1559	3.1077	3.5265	4.5068	1.1054	1.951	3.8333
MRPS16	1.0676	0.1417	-3.9835	-4.7195	0.656	-2.9368	-0.7543	0.3011	-0.01852	0.00165	-0.1182	-10	-2.8059	-4.562	0.4269	-3.459	0.01145	-0.1809	0.2041	-0.1454	-5.1268	0.2531	-0.85	-0.1935	-0.5181	-2.9916	-3.8553	0.3028	-0.9717	-0.4183	-4.0028	0.6475	-4.7561	-3.5251	-0.8694	-0.651	0.48	-2.9256	-3.5598	0.612	-0.01685	-0.5465	0.4346	-3.994	-3.0452	-5.4031	0.8658	-2.4499	-2.6833
PTPRC	0.1796	0.0915	0.2726	1.8055	0.8183	-0.1271	0.9619	0.3933	0.5415	0.3262	0.6776	-0.225	0.7233	0.2115	-0.3106	2.1645	0.447	0.5843	-0.06672	0.1055	-0.1961	0.6588	-0.0856	0.2118	1.4632	0.4753	-0.2895	0.1698	0.1776	1.4087	0.4232	0.3964	1.3483	1.6838	0.8304	-0.269	0.5454	0.1016	1.592	1.1642	-0.4754	0.639	-0.5634	0.2715	-0.06572	-0.4052	-0.7626	-0.4708	0.4735
RPS5	0.4769	-1.4288	0.7565	-1.0209	-0.5851	-0.1321	-0.2436	-0.3615	-0.5082	-0.1508	0.9201	0.4656	-0.5604	0.9945	0.874	0.4581	0.6014	-0.1303	-0.1582	0.9817	-0.0388	0.2684	-0.4171	-0.7931	-0.7282	-1.2717	-0.1123	0.4737	-1.0982	-1.2364	0.3539	0.2584	-1.8141	-0.7831	-1.704	-0.439	-0.9586	0.1815	-0.8849	-1.064	-1.7271	-0.9814	0.00575	-1.8933	0.0924	-0.7455	0.1551	-0.7439	-0.4401
NOL3	-0.3621	-0.5108	0.5305	-0.3964	-0.086	-0.8988	1.0242	-0.3459	-0.0708	0.876	0.5728	-0.1278	-0.3158	0.3108	0.2723	3.7439	0.4682	3.6543	0.7631	0.3804	-1.1734	1.1853	0.3178	1.4414	0.5216	-0.5834	-0.06199	-0.07593	0.273	1.6289	1.3818	-0.01006	-0.2626	7.1845	0.3925	0.2382	-0.7502	-0.3548	3.0641	-0.2237	-1.7247	0.3887	-0.4108	1.4077	3.3867	1.0099	0.19	0.05342	0.4582
PSMG1	2.4283	0.7347	0.7367	0.07905	0.6747	0.008766	-0.5326	0.2463	0.2648	0.2432	0.9043	0.2411	0.8802	0.6185	0.1377	-3.7933	-0.06835	-0.7454	-3.0287	-0.6597	2.2399	-0.8827	0.1154	0.3721	-3.034	0.5902	-0.6025	0.318	-1.4081	-2.0555	-0.171	-0.4013	-0.03516	-2.5015	0.77	0.3497	0.6885	0.1052	0.2279	0.5544	0.4352	-0.007145	0.07166	-4.5877	0.163	-0.519	-1.875	-0.01904	0.279
NR1H2	1.2864	0.006	0.1395	4.2127	0.0471	-1.5096	0.772	-0.4005	0.2811	0.9633	0.0605	0.4296	-0.5564	0.3221	0.8292	3.4714	1.0831	1.5855	0.7998	0.8621	-0.5124	1.3966	-0.1001	0.6118	0.8781	4.0347	-0.9827	0.4982	0.7136	2.2357	1.9132	0.4461	0.268	-0.3033	-1.0163	-2.0956	6.3529	1.3023	-0.4536	0.347	0.01395	0.5045	-0.42	1.035	-0.9005	-0.9597	1.0279	3.345	-0.1057
TMEM97	-0.278	0.7578	0.5256	0.006	0.2697	0.7178	-0.9592	0.08486	0.2673	0.06425	0.5836	0.6745	0.4211	2.5001	-0.1919	-3.603	0.28	-1.8366	-5.2712	0.3887	0.01455	-3.5675	-0.6582	-0.4988	-2.8078	-0.9409	-0.7086	-0.765	0.4552	-2.4413	1.1251	0.3032	0.7732	0.7627	-0.03278	0.8773	-3.5756	0.3856	0.08211	0.6412	1.2085	-0.6694	-0.137	-5.2629	-2.2011	-0.6905	-1.5004	-0.6496	0.4842
LRRC41	-0.2114	-1.8119	-0.4424	-0.5027	0.1734	0.2892	0.6712	-4.1976	-0.9464	-0.2453	-0.6464	-0.2947	-0.007287	-3.6496	-0.3489	3.6936	-0.07045	-0.03773	0.7555	0.1059	-4.1281	0.4173	0.6899	-0.2809	1.0554	-0.3388	-0.8377	-0.3906	0.4818	0.7425	0.9843	-0.1984	-0.3668	0.4254	-0.2746	1.9669	-0.6093	-0.7282	-0.7308	-0.4392	-2.1156	0.09378	-0.6478	1.2616	0.2932	0.2985	1.4408	-0.1359	0.07403
PLS1	-0.972	1.2509	-0.1944	3.0731	0.8978	1.1748	-0.5006	3.7154	0.6468	5.5051	-0.3774	1.5112	0.5564	1.7823	0.5466	-1.5264	-0.7374	-2.109	-1.3608	-0.3897	4.7475	-0.556	-0.09355	-0.2273	-0.5353	0.3747	-0.3572	-0.6399	1.3029	0.3765	-1.4374	-0.006352	3.9713	0.3364	2.5355	1.831	0.4265	0.7276	-0.5982	0.04314	1.2774	-0.2095	-0.4606	-3.7809	2.6685	-0.06712	0.01256	-0.306	3.0976
DUSP22	1.2401	2.9126	-1.3732	0.1068	-0.2447	-1.2368	0.2693	0.635	0.4936	-0.6453	-1.1607	-0.0878	1.0537	0.09406	-1.0306	1.6865	2.0044	-0.6248	0.5353	-0.05575	0.9583	0.1372	-0.1248	-0.3471	0.1907	-0.5387	-0.3496	-0.4171	-0.09004	-1.6532	-0.4656	-0.02755	-0.3537	0.3595	1.4443	-2.122	1.7182	1.997	-0.1509	3.9425	-0.8659	-0.07487	-0.6298	0.6556	0.8772	1.7383	-0.2828	-0.3265	1.4685
KIAA1279	-1.7288	-1.7082	0.00157	0.44	0.3045	-0.5604	-0.4467	0.4595	-0.6505	-0.9603	0.3115	0.2283	-1.7099	0.3047	0.1472	-3.5692	-1.4539	1.7035	1.4543	-0.07781	-2.264	0.8825	-0.5811	0.5734	1.1688	-0.5213	-0.384	-0.353	0.1984	0.5376	-0.2826	0.03706	-1.0027	-1.9565	-0.4865	1.4676	-1.7541	-2.0683	-2.0988	-1.4506	-0.1495	-0.4113	-0.1861	1.3173	1.0306	-1.197	-0.9259	-0.2251	-0.708
RPS6KA1	-1.4208	-0.0095	-0.5791	-0.5099	-0.08755	1.7188	-0.7717	0.1705	0.8037	-0.8171	-0.5383	-0.7981	-0.1072	0.2877	0.4873	-3.6914	-0.3452	-2.387	0.2769	-0.4725	-5.3586	-1.1004	0.9367	1.2965	-0.4008	-1.0704	-0.7619	-0.3375	0.2304	-0.01026	0.01684	-0.3749	-0.4738	0.04077	1.6458	1.1151	0.632	1.1976	-0.8012	1.0228	-0.4712	1.7516	-0.6098	0.2369	-0.2171	0.09985	-1.7632	-0.09987	-0.01803
TCEAL4	0.8139	0.506	0.8907	1.3281	0.5983	0.004057	0.2441	0.5428	0.3262	0.3004	0.7951	0.7146	1.0021	0.4079	-1.5335	0.702	0.4584	-0.5644	-1.2464	0.7716	-1.2127	0.5353	-0.2012	-0.6356	-0.4313	0.4455	-0.05946	0.6883	0.8994	0.1888	-0.9859	0.05856	0.3823	1.7655	-1.8617	-0.4882	0.6173	0.4707	0.2181	-0.4425	-0.3556	-1.8354	0.3999	-2.3526	0.4974	0.5684	0.572	1.3714	0.04009
DCK	-0.8587	1.3859	0.1874	0.4339	0.01645	0.4746	-0.8731	0.09598	0.8515	0.3518	1.1483	0.5504	0.8282	1.2401	0.7339	-2.6545	0.6832	0.05289	-0.6017	0.07145	-0.6561	-0.4798	-5.0542	0.1249	-0.8072	-0.2403	-2.7176	-0.3153	0.6003	0.03082	0.4758	0.9301	-0.131	0.3337	-3.755	-3.7149	-0.03577	-0.3384	1.0337	1.6444	1.0306	0.3295	-3.6477	-4.2279	-0.227	-0.3663	-2.0538	-0.0411	0.1834
NUP133	0.5948	0.9448	1.0163	0.8627	0.3733	1.011	-0.1003	0.1566	0.3234	0.1808	-0.07315	0.1531	0.7224	-1.1716	0.2453	1.4597	0.4395	0.7666	-4.254	0.3428	-0.2539	-2.7656	0.712	0.5304	-1.3634	0.6687	-0.3306	-0.09685	0.3304	-0.5006	-0.001594	0.1156	0.4251	0.7967	2.1563	2.5392	-0.4489	0.6574	0.3473	0.1393	-0.2168	-0.7823	0.3688	-1.6372	-0.3907	-0.2282	-1.4731	0.7975	0.1276
NUP62	0.2814	0.4992	0.7797	0.8223	0.3705	0.7053	0.2732	-0.3227	0.6443	-0.4446	-0.3512	0.0261	0.6392	-0.8481	-1.365	1.7568	-0.4272	-1.4847	-0.8545	0.1629	0.721	-0.8126	-0.5771	-0.0373	-3.3296	0.887	-0.7096	-0.258	-0.2031	-1.8515	-0.3169	-0.09322	0.0008563	0.7868	-3.1835	0.06012	-0.2924	0.5316	-0.3087	-0.1132	-0.7258	-0.9347	-0.04584	-2.3664	1.063	-0.4414	-2.1584	0.6827	-0.2405
TRIM2	-0.2316	-0.9911	-0.2074	-0.6629	-0.4708	-0.4047	0.7628	0.04088	0.3077	1.2877	0.6458	-1.9461	1.4291	0.199	-0.05905	-0.774	0.3982	0.6934	0.05262	0.4474	-0.00975	0.2575	0.1129	0.1186	1.9459	0.0182	0.5433	0.7753	-0.05031	0.7846	0.8339	-0.1939	-0.5746	-0.5229	1.2321	1.1391	0.3724	-0.2556	1.6635	0.06078	-0.4967	0.7382	-0.1825	3.3461	-0.7895	-0.4303	1.3616	-1.2124	0.7954
SNCA	0.5059	0.3844	-0.04375	0.0093	-0.4561	-0.6286	0.2503	-2.0683	0.1597	-0.1447	0.1346	0	-0.0781	-6.3479	0.4261	2.0564	-2.5031	1.2374	2.1834	0.6054	-1.8266	-0.8776	0.4427	-1.6361	2.7042	-0.982	-1.5706	-3.5912	0.9895	1.7757	-0.1944	-0.04089	0.1647	-1.1071	-1.7547	0.7395	-2.3696	-1.9151	0.297	-0.421	-1.0477	-0.5941	0.5538	3.3339	-0.9953	-0.4413	0.4934	-0.4863	-0.03912
SPTAN1	-1.6012	0.6811	-0.5177	-0.0008	-0.7061	-0.06523	-0.3634	1.4125	-0.5271	-0.6105	-1.1408	0.1183	-0.003447	3.0672	0.0158	-2.1369	5.5523	-0.3091	0.3069	-0.4651	-0.9058	4.0424	-0.8073	1.3413	-1.1854	0.1172	1.6514	0.8917	-0.4464	-0.502	0.03476	-0.1741	0.2287	-0.104	1.2432	-0.1312	1.5717	1.8039	-1.4748	-0.5281	0.1249	0.8183	0.1987	-0.6716	0.6397	-0.1871	-1.8301	0.8966	-1.6917
MALT1	0.1982	-0.398	0.1803	1.2433	0.03325	-0.5047	-0.00475	0.8951	-0.2433	-0.6736	0.01695	-0.3529	0.6562	-0.9338	-0.1796	-2.7336	0.9046	-1.6154	0.3319	1.2263	0.6453	2.0057	-0.7127	-0.04459	-0.1957	-1.4456	0.6261	-0.03043	-2.8342	-1.0211	2.0277	0.3009	-0.3087	-0.3999	-1.9254	-2.9447	-0.0009364	-0.3712	-1.9264	-0.1657	-0.4607	0.9868	-0.01608	-1.4045	-1.0433	-0.4095	0.7744	-1.5391	-0.6798
VPS28	0.1252	-0.2684	-0.8143	-0.5272	2.1472	2.1595	-0.7781	0.7045	0.3078	-0.2264	-0.9486	0.332	-0.6811	2.4367	-0.8986	1.2723	-0.7003	0.2991	-1.3536	-0.8076	-0.8275	-2.3072	-0.2636	0.9344	-0.7574	1.0249	-1.1356	-0.116	0.5297	-0.726	-0.05131	0.2701	-1.1635	-0.4834	0.9488	-1.1682	-0.09651	-0.1217	1.6161	-0.5247	-0.1919	2.4077	1.2305	-0.4704	1.7842	-0.8388	1.0092	0.8588	0.9001
LRRC16A	-1.1224	-0.4716	-1.2368	0.3918	-1.0401	-0.4106	-0.972	-0.2289	-0.6184	-1.069	2.2847	-0.8193	-1.2399	-2.1792	-1.5601	-1.0741	-0.3231	-1.8747	-0.7105	-0.3501	-0.14	-0.1123	-0.4036	0.7477	-1.4284	-1.6498	-0.1648	-1.6485	-0.3729	-1.8904	-1.2109	-0.2735	-1.9601	2.1471	-0.6434	0.1612	-0.2991	0.04589	-1.7638	-0.4027	-1.6926	-0.689	0.2448	-0.5184	0.0244	0.3546	0.8161	-0.923	-0.2871
YKT6	-0.1651	0.8845	0.1161	0.4922	0.3752	-0.216	0.4554	0.438	0.299	-0.3895	0.7708	0.8435	0.9015	-1.4873	-0.4581	-3.5159	-0.5454	-0.2232	-5.638	0.8467	1.8449	-0.8548	-0.2774	0.3896	-0.9291	0.588	-0.4382	-1.4087	0.08034	-1.2604	-1.0572	0.4104	0.4637	-3.6408	-0.7677	2.8093	0.7347	0.744	-0.1564	0.7155	0.4428	-0.3057	0.1446	-6.1067	0.3232	-0.2865	-1.4208	-0.2333	0.5137
CHP	0.532	-0.1148	-0.4555	-0.1461	-0.7521	2.5239	-0.8765	1.1892	1.058	2.0435	0.7832	-1.4615	3.8361	1.5512	1.1921	3.2425	0.4054	0.4516	-0.2414	-0.3612	0.475	-1.0151	3.8894	0.08135	-0.08915	-1.1467	-0.4388	-1.1755	0.9	0.02143	-0.3032	-0.1752	-0.2455	-0.6154	2.8482	2.5954	2.3317	0.8802	1.2388	1.2049	0.1746	1.9298	1.4404	-0.9918	1.8705	-0.2747	0.9362	2.364	2.1136
KIF2C	-0.8271	-0.5903	-0.2988	-0.028	-0.293	0.2093	-0.4523	0.5662	-0.2063	-0.05955	-0.435	0.7012	-0.8835	1.3284	-1.5441	-3.4486	-0.5739	-1.357	1.2645	0.5492	0.5019	-1.0508	-2.0258	1.383	-2.1692	-0.7856	-0.3544	-0.3565	-0.9813	-3.5054	-1.1711	-0.1788	-0.3595	-0.1115	2.2616	-0.2277	0.2161	0.3743	-1.7158	-0.7398	-0.9053	0.2086	0.3754	-0.875	0.5154	0.2477	-2.2094	-0.321	-0.7682
NNT	0.3337	1.2081	0.6704	0.7144	0.0494	0.6367	0.4506	0.5952	0.9112	-0.05405	-0.8998	0.4795	1.3259	0.1807	-0.4201	-2.9904	-0.5357	-1.2804	-1.1699	0.3895	0.3223	-1.5688	-0.0758	1.7239	-0.3194	-0.01229	-0.5942	-0.04553	0.5623	-0.7049	-1.253	0.1604	0.5457	1.1552	0.5801	-0.9017	0.09544	1.4398	0.1062	0.8475	-0.3399	-0.8558	0.3841	-1.1837	0.3941	0.107	-0.8381	0.8603	0.6889
NR2F6	0.002898	-2.1669	-0.6551	-2.3564	0.8756	-1.0906	-1.5807	-1.0095	-0.7607	0.3645	0.4891	-1.4029	-1.3973	-0.3097	0.2846	1.7853	0.5049	0.9557	0.1901	0.1969	-1.7516	0.6317	0.418	-2.5904	0.4731	-0.5019	0.04279	0.2171	-0.3691	0.7232	0.5577	-0.5012	-0.2129	-1.267	-1.1941	-0.324	-0.898	-2.0731	-0.1265	-1.5486	-0.0879	-0.04058	-0.3412	-0.1312	-2.6388	-0.5104	-2.2382	-0.7092	-2.1944
COL1A1	-3.4466	0	-0.4596	-1.3956	-0.3372	0	0	0	-0.2474	-0.3372	0	0	-0.5811	-2.7084	0	-3.5412	-0.4372	-1.158	-0.8107	-0.2456	1.4544	-5.0972	-0.3372	0.2303	-5.4656	-0.7001	-2.1853	-0.3108	-0.8647	-5.0404	-0.5767	0	-1.826	0	-4.0626	-1.3365	-0.5738	-0.0229	-1.1541	-0.6826	-0.3372	0	-0.4888	-6.5945	-0.2396	-0.3372	-5.592	0.413	0
EXOSC4	0.2704	0.971	-0.6245	0.8163	5.1219	0.04582	-0.4312	0.1437	0.456	-0.4345	0.2005	10	0.07644	-0.03733	0.4714	1.8383	0.6306	3.6724	0.3352	-0.558	2.2552	0.01735	-0.01075	0.4547	0.4932	-0.2527	0.5218	5.7492	-0.8457	1.1791	0.2965	0.3923	0.5148	-0.6895	0.285	-0.4825	0.1455	-0.4659	-0.04902	0.1911	-0.0688	0.6397	-0.2139	2.9229	0.5218	0.1786	1.901	-1.097	-0.6661
CDC25A	-1.1986	-0.8489	-1.0201	-1.5101	-0.2218	-0.4661	-0.2919	-0.08312	-0.9278	-0.5943	-1.6007	-0.1412	-0.1855	1.4192	-0.2022	-2.0788	-0.9529	0.3063	-0.883	-0.721	-0.2131	1.5788	-0.2472	0.088	-1.7902	-0.3161	0.1083	-0.8852	-1.182	0.5302	0.08935	-0.6717	-0.2422	-0.7098	0.4343	1.6357	-0.1006	-0.05018	-1.2959	-0.4599	0.5663	1.0497	0.1242	-5.2644	0.6542	0.05121	-2.0667	-0.5997	-0.597
PDLIM1	-1.8144	0.7881	0.8285	1.2313	0.161	0.8886	1.3709	0.5341	0.7245	-0.1113	-0.1549	0.7193	0.7575	-0.06386	-1.6329	-1.2899	-1.1433	-1.5632	0.04691	0.7034	1.1111	-3.8339	-0.8023	-0.1346	-2.6552	0.9588	-0.9459	0.3642	0.7831	-3.5751	-0.3725	0.2814	0.1046	0.4315	-3.6714	-2.6382	0.2452	1.0643	0.3317	0.3462	-0.0973	-0.9499	-0.4218	-2.4087	0.8745	0.6514	-3.893	1.5991	0.7099
CRELD2	-0.5236	0.1279	-0.8091	-1.262	-0.3167	0.5053	-0.378	0.1291	-0.3745	1.9525	-1.2828	-1.4873	0.2793	0.03157	-0.02165	3.8622	-0.5707	0.5067	-0.4151	-0.04765	0.6298	-0.3039	-1.1416	-0.4281	-0.7712	-0.1743	0.04422	0.5655	3.4599	-0.988	-0.03109	1.5118	0.5491	-0.06293	-0.6397	5.0097	0.1903	-0.1428	1.0997	-0.5232	-1.1945	0.0253	0.4792	-2.5534	-0.3129	-0.2646	1.4692	-0.04051	4.2622
TP53	1.4673	0.8238	0.4557	0.07665	-0.08475	0.03507	0.0971	0.345	0.133	-0.1476	0.4627	-0.4151	-0.6837	-0.6152	-1.5867	-2.6177	1.067	0.6256	-3.4692	0.4303	0.2351	-4.8544	-0.0607	-0.8804	-3.1984	-0.3485	-1.7666	-0.1805	-1.9206	-3.1399	-1.8175	0.6746	0.289	-0.2626	0.2696	-4.449	0.3377	0.4796	0.01971	-0.08378	-0.5633	0.01602	0.5425	-3.9437	-0.4237	-0.001264	-7.9618	0.1893	-3.6561
IQGAP1	-0.5496	0.0308	0.5026	-0.1533	0.1566	1.2971	0.8205	0.9214	0.6108	0.4739	-0.3584	0.3195	0.8794	1.8954	-0.9979	0.5818	-0.8801	-0.8595	2.5831	0.8913	-4.399	1.1998	-0.0789	0.6142	1.1101	-0.01487	0.1911	0.5535	-0.3195	0.5105	-0.6212	-0.07126	-0.6483	0.2443	0.1369	0.2617	-0.007952	0.2851	0.7574	0.4858	-1.2789	-0.2204	-0.157	0.4362	1.0185	0.4003	0.234	-0.1041	0.1449
RRP12	0.7368	-0.4517	0.5321	0.3941	0.5328	0.06018	0.4858	-0.718	-0.3909	1.0651	-0.2259	0.022	0.8645	-0.7033	-0.0519	2.0136	1.0489	-1.1016	1.0955	0.544	3.4674	3.2152	0.0296	1.2666	-0.7611	-0.1915	1.6091	-0.8129	-2.0675	-0.4721	0.9461	-0.05427	-0.01139	0.7145	4.12	-1.518	-0.07755	0.02111	0.627	-0.6994	-0.8753	0.7371	0.2278	-1.6999	0.8019	-1.2141	1.1948	-0.02713	-0.7799
ACAT2	-0.3688	1.1325	0.6657	0.2632	0.3469	0.2947	-0.6064	0.3323	0.7782	-4.9307	0.1125	-10	-2.2651	0.16	0.3584	0.4929	0.02938	-0.7674	-2.181	-2.4254	-0.4836	-6.1452	-0.05485	-0.6217	-3.595	-4.0326	-0.1271	0.07182	-4.4508	-1.4412	0.6811	-2.322	-0.4255	-0.5668	-5.0406	-0.844	0.2906	-0.6887	-3.2217	0.9842	1.3084	0.2806	-0.2355	-4.0748	-0.02502	-3.0635	-4.4474	-2.3676	-0.0913
EGR1	-0.9236	-0.3412	-0.7098	-0.2684	-0.218	0.03559	-0.6001	-0.9108	0.3907	-0.7071	0.0987	6.6604	1.8341	-0.6666	0.6047	0.9885	-0.3852	0.7121	0.6989	1.5776	-0.5996	1.2412	-0.2704	0.08436	3.7035	2.2021	-0.7257	-0.03401	2.1671	-0.428	-0.04401	3.3336	-0.6035	0.2749	2.2643	-1.4482	0.02521	1.1533	0.6443	0.2675	0.2344	-0.3416	1.0302	6.846	-0.1787	2.8184	2.6572	1.3305	0.1685
MUC1	0.6158	0.2745	0.5728	-0.4396	0.7962	-0.6683	-1.0289	0.7501	-0.3096	0.2435	0.9954	0.833	0.8999	-0.2375	1.6527	1.3359	-0.6254	0.6743	0.5256	-0.4159	-0.1005	0.4684	-0.2395	-0.2904	0.04155	0.7727	-0.5353	0.1276	0.2994	0.9695	0.8592	0.2646	0.6262	0.2285	0.2068	-0.4938	0.1535	-0.2518	-0.2019	0.9401	0.1903	0.4474	0.02259	-0.1559	-0.3333	0.9419	1.1245	-0.617	-0.8614
THAP11	-0.2085	1.1365	-0.2619	0.6267	0.2376	1.6076	0.409	-0.4495	0.6994	1.0412	-0.1836	0.3923	-0.4096	1.2313	0.6977	1.5234	1.1496	0.07045	-0.1746	1.0793	0.3899	-0.413	1.2412	-0.03912	0.5508	0.3346	1.8906	0.8367	1.4035	1.0573	1.14	0.486	0.214	-0.4215	0.2808	0.2736	0.5303	-0.1782	1.1059	0.9161	0.9722	0.4255	0.6936	0.5627	1.2335	0.1386	-0.1176	0.8395	0.2306
AURKB	0.05652	-0.3763	0.7274	1.0655	0.9798	0.2212	1.3969	0.4256	0.6562	1.3218	1.6215	-0.373	0.9772	-0.01494	0.0472	4.0526	0.8686	-0.3898	-2.6803	1.7272	-0.8586	0.3898	-0.1699	-0.2705	-2.2608	-0.2006	0.09381	-0.0174	-1.2439	0.4122	1.4989	0.454	-0.1647	-0.3184	-0.909	0.3846	0.08175	0.1393	1.7061	0.08627	-1.4927	0.1613	-0.1325	-5.7121	0.03076	-0.5995	-1.8558	-0.7125	0.3213
CEBPD	-0.7384	-0.6658	0.5185	0.0011	-0.0671	0.04686	1.1663	-0.5807	0.3702	0.6073	0.0345	-0.5626	-0.7621	0.651	-0.1843	4.1515	0.2206	1.1886	1.0211	0.6876	-0.2923	0.2315	-0.0988	-0.1893	1.0036	-0.4388	-0.2502	0.7241	1.5702	1.4821	2.0241	-0.5626	0.3813	-0.7272	0.3994	-0.379	0.2395	0.06099	0.5981	0.1563	4.6343	0.3699	-0.268	0.1659	3.1037	0.004008	3.3596	-0.9143	-0.1499
HSPA4	-1.3835	-0.3683	0.1477	-0.5874	-0.7036	0.4593	-0.4463	0.409	-0.1243	-0.5564	-0.3164	-1.3395	0.6944	-0.5322	0.463	2.9916	0.5405	0.542	-1.9608	0.9061	-0.4301	-0.1377	-0.6094	0.4928	-0.8834	-0.07525	0.9288	-0.04468	-0.1327	1.6833	1.1815	0.3685	0.343	0.6498	-2.1311	3.1753	0.02812	-0.333	-0.5287	-0.141	1.0287	0.2392	-0.1703	-1.4465	0.6681	-0.438	0.152	0.2596	-0.6091
MAST2	-1.0858	0.01255	-0.2839	1.0394	-0.4191	-0.968	-0.6106	-0.348	0.392	-0.2089	0.0112	-0.71	0.5336	2.7288	-0.2534	0.7586	-0.7194	-0.2937	3.3161	-0.09408	5.2115	1.1268	0.6337	-0.189	-0.836	-0.9172	0.8774	-0.7456	-1.3141	-1.6748	0.4944	0.2434	4.8719	-0.816	3.6209	4.7749	-0.3397	-0.1416	-1.6629	-0.9075	-0.2654	0.7669	0.3373	-0.9162	3.6029	0.1913	-0.1072	-0.9076	-0.387
DHDDS	0.001809	-0.9344	0.136	-1.6535	0.0304	-1.126	0.0568	-0.5215	0.6847	-0.6428	-0.3447	0.3056	-0.5012	-0.3962	0.3892	3.5331	-0.1394	0.992	-0.4145	-0.827	4.464	0.8494	0.1588	0.1902	-0.4795	0.3166	1.196	-1.2277	-0.3113	0.7429	0.2923	-0.7357	-0.1019	-0.5951	0.3621	0.9038	-0.5615	-1.1835	-1.8405	-0.1186	0.01455	0.8575	-0.08232	2.732	-0.4069	0.08104	2.3762	-0.8028	-0.363
TOP2A	0.1925	1.0053	-0.08395	-0.9316	-0.5669	1.1549	0.2796	0.2242	0.2836	-0.5833	-0.6651	-0.174	1.1022	-4.7778	-0.2239	-3.4491	-0.2574	-0.6933	-7.8139	0.04589	-5.1079	-4.6512	1.1316	0.4519	-0.6004	0.1339	-1.5138	-1.1461	0.2002	-1.2525	-1.5204	0.1875	0.5893	0.3118	0.546	0.2712	0.8133	0.8793	-0.1676	0.4775	-0.1198	-0.9113	-0.5993	-7.4795	0.5169	0.1227	-4.7615	-0.3675	0.8819
GADD45B	0.1059	0.584	-1.2033	-1.4541	0.2559	-0.8466	-0.03135	-0.2255	0.3569	-0.7722	-0.4206	-1.2944	0.4954	-1.8879	-1.5101	0.08826	0.8074	-0.4292	-1.6813	0.1965	-0.7411	-1.5693	-0.1616	-0.2001	-1.7301	-0.1229	-0.7355	-1.3001	-1.6515	-1.282	-0.7519	0.3338	0.3874	-0.8592	-0.8981	-1.1891	-0.09623	-0.1631	-0.1365	-1.136	-0.5724	-0.292	-1.1475	-1.2591	-0.2541	0.4667	-1.2772	0.28	-0.04617
NCK2	-0.2624	-0.3432	0.516	1.4046	-1.0822	0.2498	-1.9156	0.1554	-0.2502	-0.1351	0.1055	1.1368	-1.1022	0.06629	-0.08335	-2.1249	-0.7501	0.1397	0.8405	-1.5216	1.0988	0.5965	-0.4345	-0.3957	1.2083	-0.1706	-0.2018	-0.4409	-0.2646	0.2443	-0.05372	-0.4734	-0.5536	0.542	0.9191	0.8113	-0.3609	0.3066	-0.464	0.2505	0.1021	-0.4747	0.8185	1.4911	0.8572	-0.1749	1.0803	-0.8239	-0.4893
AURKA	0.5863	0.8638	0.5867	1.1492	0.8349	0.3495	0.3753	0.9782	0.7451	0.3591	0.3931	-0.02	1.7994	-2.9845	-0.848	0.449	-0.01063	-0.5936	-3.2086	1.1796	0.2184	-0.5258	-0.6644	0.8001	-1.5994	0.8466	0.3555	1.0444	-0.7754	-1.4413	0.3411	0.7476	0.8342	-0.1454	-2.9526	1.4841	0.6808	0.5461	0.5383	0.09121	-0.1151	0.3323	0.4193	-3.8453	0.7978	-0.5821	-2.0562	-0.0007938	-0.09171
KIAA0355	-0.4447	0.3325	0.2761	-0.5554	-0.3688	-0.05389	2.3762	0.4734	0.4072	-0.876	0.7144	-1.4928	1.2155	-0.2606	-0.1039	0.8776	-0.9829	0.9469	2.0408	-0.8248	-0.4809	-1.0187	0.2377	0.8222	-0.5882	1.1497	0.3569	-0.717	-0.3134	1.484	-1.1588	0.02093	-1.3085	1.856	1.9222	-0.6914	3.5086	1.5639	-0.5009	0.7835	-0.5577	-0.3172	0.1486	0.5636	1.9608	-0.2675	2.8421	0.1889	-0.1361
B3GNT1	-0.5949	-0.1738	-0.3712	0.1921	-0.1053	-1.524	-2.0282	-0.7865	-0.6767	-2.9622	-1.1007	-0.1096	-0.3503	-2.1404	-1.678	-2.0209	-0.3777	-1.0546	-1.3033	-0.2448	0.3589	-1.0312	-0.03065	-0.1829	1.2088	-0.06092	-1.2911	-0.7467	0.6563	-1.2049	-1.8827	-0.4428	-1.4126	-1.3042	-1.809	1.9798	-0.5651	-0.258	-2.6198	0.5918	-0.2621	-0.4304	0.06809	0.7968	-0.2025	0.9543	-0.7798	-0.4902	0.7148
DYNLT3	-0.5758	-0.07245	-0.545	-0.925	-0.5225	1.588	0.7198	1.499	1.3456	2.2234	1.297	-1.4779	-0.001767	-2.5292	0.7569	-0.8896	-1.1283	-0.8373	0.4186	-0.2784	-0.147	-0.5328	-1.1237	0.11	0.5006	-0.2876	0.1676	0.1645	0.1807	-0.8347	0.9194	0.8085	1.2084	-0.5486	-0.3453	2.7738	1.3491	1.0668	1.6328	0.03717	0.6297	-0.4681	-0.2976	2.3629	0.7517	-0.1358	1.1583	-0.6129	0.4532
CDK5R1	-1.9908	0.7186	-1.2845	-1.4758	-1.0809	2.2028	-1.0856	-0.4363	1.957	-0.3228	-0.7912	-0.0206	-0.9302	-1.2424	4.7776	2.1129	-0.2157	-0.9656	1.169	-1.2313	4.622	0.3974	0.08375	0.4512	-0.8038	-0.7106	-1.1946	1.6572	-1.9556	3.3208	-0.8955	-1.0288	4.4899	3.5874	3.3941	-0.246	-1.1369	1.8138	-1.7125	2.4247	-1.0806	0.3535	0.05452	-0.9406	1.9226	-0.6584	2.8744	5.8125	3.2665
CHMP4A	2.6466	0.7225	1.2074	0.9354	0.5917	-2.7052	0.0733	0.05998	-1.8727	-0.1549	1.2822	1.0669	1.0033	-1.6425	-4.7988	-3.0151	-0.3574	0.7696	0.5286	0.1942	-4.6982	-0.9452	0.163	-0.2005	0.8782	0.564	-0.886	-2.5449	1.707	-3.797	0.9154	0.1654	-4.5272	-3.3628	-3.6325	-2.1533	0.1968	-0.9648	0.7137	-2.8611	-0.0962	-0.9772	0.02724	0.1203	-2.8679	-0.1369	-2.9436	-6.0714	-6.7109
IPO13	1.4392	-0.4663	2.3795	-0.8	-0.5118	-0.2404	0.964	-0.173	-0.6595	-0.1755	0.5383	3.6637	-0.2382	-0.2824	-1.173	3.0083	1.541	-0.332	-0.07752	-0.09295	0.4347	0.8368	-0.595	0.1378	0.0804	-0.7682	0.4305	0.8994	1.1305	0.7208	1.1658	-0.2119	-0.3789	-0.7957	-0.1331	1.4598	0.1205	0.07937	-0.7231	2.1119	1.2796	1.0497	0.0107	1.0155	0.5708	-0.9276	-0.02302	0.498	0.8854
SCP2	-2.1508	0.7843	-2.2896	0.2351	-0.1858	0.1847	-1.1047	0.1686	0.6752	-0.2316	-2.3289	-2.6121	-0.04982	-0.472	0.1363	-0.8492	-0.6881	-0.737	-0.8342	0.5201	-1.024	-2.0589	-0.9959	-0.3224	0.6168	-0.6688	-0.2759	-1.0695	-1.0915	-1.0299	-0.7791	0.1925	0.3295	-0.4805	0.4087	-0.3985	1.1271	-0.1885	0.07393	-1.5868	-1.0124	-0.7526	0.4117	-0.6447	-1.3429	-0.3274	1.5084	-1.2884	-1.125
ITFG1	0.7662	-1.2585	0.2026	-0.4326	-0.689	-1.3946	-2.5921	0.001411	-0.6556	0.3294	-0.8788	-1.0804	-2.0931	-0.8551	-1.6382	0.736	0.00321	0.01777	-0.1785	0.3053	1.3978	-1.9569	-1.071	-0.2189	-0.04422	0.529	0.625	0.741	-0.5979	0.07349	0.6828	0.4003	-0.4737	-0.8902	-1.034	-0.7146	-0.6902	-0.302	-1.961	-0.8824	-0.224	0.5674	0.04819	-0.1361	-0.5771	0.8602	-1.4967	-2.1376	0.5046
RAD9A	-0.8518	0.2223	-0.8801	-0.3604	0.1971	0.5344	0.6521	-0.2655	0.2889	-0.7544	0.1065	0.5895	0.6243	0.06075	-0.38	-0.4358	-0.317	-0.6383	-0.8162	-0.1998	0.5767	0.0448	0.2647	0.01226	-0.002025	0.08049	-1.0239	-1.0215	0.8863	-0.8174	-1.565	-0.1343	-0.1702	0.5678	0.5886	0.5293	0.2206	0.4016	1.447	0.7994	0.0033	0.006721	-0.1098	-0.2911	0.1055	-1.0997	0.461	0.9877	0.02061
DRAP1	1.7671	0.3771	1.2478	1.8865	1.0769	0.1136	1.4559	0.8611	0.7406	0.6426	2.1545	-0.1606	1.3292	1.1815	0.9398	-2.8969	0.3076	0.351	1.288	1.7199	-1.5537	1.5317	0.2444	-0.3617	2.4767	0.5633	0.7796	-0.2053	0.3365	2.094	2.499	0.3395	0.8941	0.2706	1.3399	2.0024	1.0466	0.03377	0.09328	0.3528	0.6732	0.7213	0.5277	0.1464	0.5014	0.3581	0.6561	0.2627	0.1488
SPP1	3.4021	0.5603	-0.2693	-0.2826	-0.156	-0.1475	0.1094	0.004638	1.2028	-0.5487	4.8435	-0.7769	0.7834	-0.2038	0.3819	0.06297	-1.0565	2.3717	-0.1237	-1.1625	5.3638	-0.4929	-0.4244	3.9158	1.831	-0.1892	-0.06974	3.4297	0.08825	-0.2707	-0.1272	-0.612	-0.8544	-0.8777	5.975	-0.8032	0.489	0.1384	2.7004	-0.8062	0.7	3.6184	0.1824	4.0264	0.6316	-0.1464	7.3378	0.07104	3.0716
HYOU1	0.367	-1.2096	0.2835	-0.8284	0.2432	0.2667	1.3803	-0.2814	0.03352	0.758	2.4279	0.0208	0.132	-0.0905	0.4119	0.7663	0.3746	0.3506	-0.9502	1.2867	-1.3053	0.7974	0.01045	-0.9731	0.07307	-0.02779	0.9355	0.5604	-0.188	0.4094	1.1395	1.202	0.3248	-0.3441	1.0747	1.8119	-0.2088	-0.3578	0.7208	-0.02628	-0.6257	1.2033	-0.2238	-1.2546	0.0943	-0.145	1.2	-0.4218	1.6261
PCMT1	-0.8122	1.2446	-0.4003	-0.2561	0.2308	-0.04654	0.2718	0.08004	0.01098	-0.0733	0.7215	0.1335	-0.2647	2.4267	0.2929	-1.4433	-0.1822	0.4698	0.6598	-0.7541	-0.651	-1.7653	-0.937	0.7616	-0.1735	0.493	-0.4969	-0.5132	0.7365	-1.0048	0.2189	0.008573	-1.0684	-0.5061	-4.4228	1.8972	0.3883	-0.01141	0.9374	1.1704	0.6059	-0.1783	-0.2431	-1.2503	-0.3767	0.2081	1.0721	0.3272	0.6472
FOS	1.123	0.1437	-0.5467	-0.3257	0.9211	0.7182	0.1432	0.5731	1.2765	1.9362	2.0421	3.2847	-1.0268	1.1552	0.7447	2.7105	0.2303	0.4961	1.6852	0.9686	2.2433	0.5192	-0.8021	0.5346	0.9294	0.5234	-0.08983	-0.6782	1.0416	0.5253	2.2718	1.2976	-0.6426	1.5389	-0.07508	0.1065	-0.06388	-0.3325	-0.02773	0.4023	2.1857	0.9713	2.2384	1.6448	1.3001	0.7829	1.5954	-1.4289	-0.5704
FYN	1.7537	-0.7627	0.2487	-0.1586	-0.7927	-0.9066	-0.7632	-0.1124	-1.6704	-1.3136	-2.2139	-2.9803	0.3326	0.319	-1.5032	1.2704	-0.6805	0.9041	0.3873	0.4101	-3.0475	0.01775	-0.02905	-0.1871	1.8814	-0.2581	-0.5016	0.387	-1.7638	-0.9111	-0.9592	-0.8203	0.3861	-0.9351	0.6238	0.5094	0.6285	-0.2808	-0.9427	-0.9174	-1.5461	-0.3504	-0.3225	4.7855	0.5678	-0.1152	1.6161	-0.5253	0.9872
MCOLN1	-0.2233	0.1007	0.5937	0.2352	0.5627	-1.1987	0.2414	-0.5065	-0.05785	-0.9913	-0.4617	0.5903	-1.1644	-0.8189	-0.0383	-0.2368	3.5409	-1.6168	0.7958	0.6832	1.7673	0.5389	0.5452	0.5994	-1.6675	-0.6244	0.8174	3.0189	-1.2762	-0.755	0.873	2.8742	-0.1146	0.293	-1.0856	3.4827	0.4233	-0.03313	-0.8074	1.1103	1.7654	0.4985	0.118	1.244	-0.1291	-0.7334	0.2655	0.4167	-0.6726
MYC	2.443	1.2141	0.4925	0.2872	0.3062	0.0572	0.8868	0.33	0.2344	0.574	-0.2102	0.4623	0.5796	-3.0332	0.6201	-2.6116	1.0558	3.7649	-1.8729	-0.3101	2.0404	1.1093	0.7918	-0.2438	-2.9724	1.408	0.2652	0.4283	-1.0189	-1.1066	-0.1968	0.1519	-0.3582	1.0087	-1.3039	1.2626	-0.2716	-0.3811	-1.0127	-0.1563	0.1392	0.5553	0.5306	-6.1251	0.9816	0.01738	-2.2084	1.1915	-1.9084
ID2	0.3748	-0.1005	0.5276	0.4559	1.0071	0.351	-0.3623	-0.2326	0.5974	0.6083	0.05605	1.6466	0.7919	-0.632	0.09765	0.2122	0.6421	0.6453	-1.0522	0.778	2.452	-0.2638	-0.6265	0.1943	1.9163	0.5326	0.07352	1.3074	1.3267	0.4664	1.1487	0.8206	0.2519	-0.1043	-0.9957	0.815	-0.2385	0.2639	-0.2998	0.4941	0.8694	0.5677	-0.5547	0.3145	1.1657	-0.231	0.1887	-0.8024	0.5973
POLB	-0.2922	0.9747	0.123	1.8168	0.411	0.008336	0.5156	1.0517	0.1984	0.06495	1.5094	-0.5504	1.3414	0.04445	1.8297	2.0408	0.9895	-0.3994	-0.02869	0.05109	0.1457	0.8786	0.7294	-0.106	0.2302	0.191	0.3466	-0.4975	0.3733	0.5215	2.0982	0.2119	0.6771	-0.3607	-0.1908	1.4495	0.849	0.08732	1.3933	0.765	0.5223	0.7024	0.4683	0.4836	-0.7513	0.2083	0.499	0.3424	-0.06359
CETN3	0.5838	0.4705	-0.04951	-0.9895	0.0783	0.7206	-0.07065	-0.3058	0.4395	0.00985	0.4122	0.7324	1.4673	0.2172	-0.5421	2.2662	-0.538	0.6263	-1.7928	-0.8784	2.3741	-0.3359	0.6172	-0.4599	-0.1024	1.5208	-1.1524	0.4276	0.09182	-0.3736	-1.7971	0.1467	-0.461	0.546	-0.4144	0.9033	-0.2661	0.6102	0.6068	0.454	-0.5899	-0.9242	-0.4217	-0.2476	0.7663	-0.5457	0.04385	1.5769	0.2288
KCNK1	-0.1227	-0.4268	2.7221	-0.7021	-0.2778	4.8215	0.9945	0.2869	0.01939	-0.2639	0.4148	5.3331	5.1106	0.4673	-0.578	4.3166	0.3247	-0.01172	-0.08054	2.2407	1.9158	0.9075	0.4236	-0.5432	0.02627	0.4828	3.9356	0.6517	0.1114	3.6839	0.2924	-1.0373	3.3202	-0.04689	-0.448	0.4513	2.511	2.1287	-0.5243	-0.584	-1.7745	-0.5876	-0.5802	0.6213	2.2282	-1.0901	0.8856	5.187	2.7407
AXIN1	-0.0955	-0.0256	0.2205	-0.1116	0.1538	-0.1015	-1.1252	0.1347	-0.233	-1.0606	0.9998	-1.0575	-0.4932	-0.3614	1.0095	2.8203	-0.1253	2.1869	1.2957	-0.4108	-0.2557	0.7027	-0.367	0.01152	-0.4513	0.3468	-0.1082	2.9383	0.1446	-0.5476	1.4304	-0.2422	0.01078	-0.6427	0.97	-0.9523	-0.7136	-0.4754	-0.6405	-0.6871	-0.1758	0.6356	2.7312	0.8294	0.0785	0.3446	1.0904	-0.794	-0.533
SMC4	1.5145	0.9641	1.6405	1.0693	0.0428	1.4727	0.1027	0.705	0.7255	0.4775	1.4173	0.9874	0.8721	-3.2362	-0.191	-3.2307	0.532	0.2458	-3.7532	0.6875	0.3844	-1.2405	0.1238	0.5224	-1.2661	0.524	-1.0851	0.3117	0.6925	-1.1359	-0.4457	0.29	0.2753	1.6188	0.04742	0.1157	0.2804	0.406	0.4383	0.4857	-0.296	-0.6068	0.297	-3.9802	0.6715	-0.07574	-2.0268	0.3344	0.1443
RAI14	0.1798	0.6061	0.5267	0.1553	-0.0799	0.3503	0.4252	0.4034	-1.0611	0.0074	0.3331	0.5639	-0.304	0.3911	0.4916	-1.984	0.5497	1.2865	5.1679	-2.0715	-0.791	1.3886	0.9179	-1.0503	3.6814	0.2473	0.4877	-1.1618	-0.5204	2.5127	-2.3029	-0.2789	-0.9372	0.0533	0.5018	-2.6705	0.2048	-1.4778	-0.1022	-0.2468	-1.3435	1.2904	0.2376	3.6732	0.1612	0.1197	2.8784	-0.2565	-1.5705
SMARCD2	-1.0676	-1.4748	-1.0021	-2.3599	-0.532	-1.5943	-0.7892	-0.952	0.4905	-0.9064	-1.2945	-1.2239	-1.078	-3.7978	-1.2332	-0.129	0.0237	-0.3568	-1.7665	-0.4659	-2.2136	-1.7925	0.2437	-0.7425	0.3427	-0.9646	-0.001598	-1.1098	-0.3917	-2.379	-1.3608	-0.4181	-0.3386	-0.434	1.3727	-0.1343	-0.5904	-0.5209	-1.431	-1.0861	-0.9835	-0.1152	0.229	0.1166	-0.124	0.2091	0.1628	-0.1229	-0.2531
DNAJC15	0.9882	1.1908	0.6713	0.9358	-0.00065	0.5868	-0.3895	0.4353	0.6865	0.7524	1.1547	0.4094	0.6354	0.05319	-0.6576	1.512	0.825	0.2825	-0.2398	0.3213	1.4399	0.7972	-1.0833	0.2531	-0.6212	0.5669	0.3863	0.3642	0.6	1.6906	1.5079	0.2124	1.5415	0.2784	-0.6166	1.3087	0.8554	0.043	2.0422	2.1701	0.202	0.2064	0.2344	-0.9339	2.0114	0.1891	-1.1311	0.5726	-0.05764
MPZL1	-0.5708	0.8189	-0.2795	-0.4446	0.6608	0.2508	0.4859	0.5845	0.06182	0.3993	-1.0519	0.8983	0.3446	1.7462	0.7352	-4.0116	-0.8962	-1.4007	-0.7631	0.3744	-1.0616	-1.5616	0.6074	0.2244	-1.1734	0.5245	0.2658	0.2087	0.2393	-0.6613	-1.0749	0.09599	-0.4546	0.3946	-0.5008	-1.2476	0.3789	0.5815	0.02065	-0.3122	1.1962	0.02858	-0.1747	-0.2706	-0.2727	0.2047	-2.302	0.3574	0.6958
HOXA10	-2.0726	0.1841	-0.5063	0.4172	-0.6286	-0.1463	0.0556	0.1512	0.3507	-0.2225	-0.03435	0.8656	-0.2653	-0.6659	-0.431	-2.6879	1.2073	-0.242	-3.1101	0.6869	-0.4747	-3.0071	1.1094	0.1476	-1.2322	0.3129	-1.2646	-0.4088	1.3015	-2.2269	-0.4639	-0.06646	-0.4264	1.0639	-0.5666	-1.5415	0.9212	0.1491	0.2736	1.0534	1.2445	-0.2715	0.8929	-0.6609	1.2895	0.187	-2.9317	0.5993	0.2842
NRAS	-0.721	0.9549	0.844	0.9067	0.1672	0.6375	-0.7416	0.5251	0.7901	0.5507	1.0061	1.2244	0.9109	-3.0289	-0.0804	0.7995	1.4128	-2.2901	-0.09981	-0.2826	0.3738	0.3301	-0.7839	0.1617	-2.0489	0.1574	-0.06636	0.5463	-1.3855	-1.2167	1.556	0.8344	0.3323	-0.4737	-0.8775	-2.4735	-0.4893	0.57	0.2746	-0.2271	0.2144	0.002004	-0.5879	-1.4897	-0.04963	-0.2662	-0.6893	-0.7212	-0.008838
CASP2	-0.7835	0.4794	3.8054	0.04865	-1.0542	-0.000538	-0.5466	0.7421	-0.05064	-0.2103	-0.3514	-0.7904	-0.5432	-0.4538	-1.155	0.5068	2.9766	-0.6078	-1.0596	0.2994	0.05375	-1.4866	-0.3933	0.1161	-1.7707	-0.3187	2.7785	-1.0675	-0.3135	-0.5988	-0.5639	-0.394	-0.3118	4.0314	0.8133	-0.3242	-0.4948	0.6717	-1.107	0.02264	0.5997	-0.8769	0.8655	-1.2744	0.6001	0.1912	0.4373	0.2747	-0.346
EBNA1BP2	0.7813	0.4773	0.5691	0.8508	0.6399	-0.335	-0.4498	0.218	-0.7786	0.1445	1.3155	-0.3375	-0.07735	-1.8894	0.8783	-2.8026	1.0906	0.7587	-1.5894	0.4215	-0.1055	1.9482	0.0176	-0.4174	-0.8823	-0.4514	1.1746	0.1602	-1.5029	1.5338	0.8101	0.3646	0.422	-0.5614	-0.1797	-1.7215	0.0292	-1.095	-0.3009	-0.07173	0.5107	0.9784	0.8722	-2.6998	0.8253	-0.09433	2.8531	-0.5472	-0.8533
CTNND1	-1.1742	-0.135	0.8034	-1.1416	0.4486	0.6656	1.4069	-0.1433	-0.973	0.7513	-0.9112	-2.2748	-0.04266	-0.2426	-1.5814	2.3471	0.7768	0.6052	-1.536	0.2665	-0.9729	-0.5343	0.1956	-0.5247	-0.7036	0.08211	0.7405	0.359	0.2333	0.9809	0.7821	0.1312	-0.9821	0.3299	-2.4152	-0.2415	-0.4705	-0.1397	1.3894	-0.7144	0.09575	-0.1821	0.2243	-0.4426	-1.384	-1.0998	-1.787	-0.07689	0.9781
TATDN2	1.2246	-1.0659	-0.1958	3.165	0.4172	-0.3643	-0.9368	-0.002064	1.5461	-0.8408	3.9307	1.472	0.1718	2.4833	3.4441	-2.9782	-0.3309	-0.7027	2.0194	-0.5987	0.1102	4.4995	-0.3893	0.7144	2.5893	-0.8492	-0.1377	-0.356	-1.1885	-0.8143	0.3848	-0.912	0.8986	0.1367	1.3982	0.4592	-0.2553	-0.33	-1.3403	2.5162	-0.3342	0.4546	0.3395	-0.413	0.6893	0.7311	0.5946	0.456	-0.2273
LRPAP1	-0.6966	-0.4843	-0.3927	-0.8347	0.1858	-0.5553	-0.9912	-0.9956	-0.8509	-0.2935	-1.4349	0.228	-0.9589	0.2409	-2.5342	2.1244	-0.7244	0.8186	-0.4102	0.1941	1.5643	0.4078	-0.3813	-0.8359	-0.5735	0.3616	0.8968	-0.2882	-0.01102	-0.1797	-1.2561	-0.9909	0.348	-0.0282	0.847	1.621	-0.0956	-0.4084	-0.9809	-0.1178	0.7217	0.4062	-0.1124	-1.432	-0.7552	0.5466	-1.1416	0.62	0.5251
ZNF131	0.1794	-0.1292	0.2979	-0.4256	0.3	0.437	0.4377	0.414	0.2522	0.7569	0.3067	0.5712	0.4801	0.5335	1.8282	0.2445	1.3731	0.4329	0.284	1.6853	-0.883	0.7795	0.8615	-0.5983	0.538	0.1214	2.2907	0.1349	2.1192	0.1147	1.486	0.4748	1.1822	0.04957	0.5366	0.7518	-0.318	-0.5395	1.1665	1.2012	0.2864	0.9619	0.3314	1.8315	0.94	-0.5887	-0.297	-0.5762	-0.2063
BNIP3L	-1.7517	0.5541	-0.4797	-0.303	-0.7441	0.01076	-1.0395	-0.09413	0.4968	-0.474	-0.4329	-0.5526	-0.1378	-0.4423	-0.3384	-3.3448	-0.07446	-0.1579	-0.2546	-0.3835	0.365	-0.3868	-0.8658	-0.2929	0.4237	-0.2667	-0.6048	-0.4428	1.0402	-2.3951	-0.9318	0.5745	-0.1815	-0.7914	-2.6676	-0.5933	0.8856	0.9396	1.4236	0.875	-1.3582	-1.5774	-0.5322	0.3641	0.6771	3.3038	-2.8386	0.03859	1.4067
HOOK2	0.6755	1.1039	4.6796	0.2743	0.5839	0.1763	-0.9984	3.6164	0.196	0.9123	1.1938	0.202	-0.3274	0.6978	1.6197	0.3096	0.9168	0.7179	-0.5927	1.9022	-0.964	-0.5213	0.8868	-0.7743	-0.4781	0.4686	0.8908	0.2758	1.9588	-0.583	0.4538	0.8066	0.4598	0.4281	2.5694	-0.4376	0.3042	-0.01203	1.1081	1.276	1.461	0.3383	0.9983	3.249	0.532	0.7665	-0.838	-1.4998	2.9334
ERBB2	-0.3845	-0.5071	-0.1424	0.8845	-0.2709	0.7532	-0.7896	0.7339	0.1519	0.6772	0.3262	-0.7076	-0.2594	-0.7679	-0.1495	0.3335	-0.1325	0.1182	-0.5237	0.08297	-1.097	-0.6262	-1.2557	0.2471	-0.8029	-0.2319	-0.4182	-0.3319	-0.2868	0.2485	-0.02379	0.9143	-0.1393	-0.2078	0.309	-0.3187	-0.5238	0.05165	0.5195	-0.0875	-0.2378	0.09698	0.0002432	-0.06755	-0.457	0.2963	-0.5343	0.4912	-0.08368
TBPL1	-0.3194	0.7337	-0.2313	-0.2803	0.6571	-1.1195	0.03615	-0.3988	-0.1927	-0.6344	0.3561	0.6162	-0.133	-0.8733	-0.3456	-1.9116	-0.08441	-0.2628	-0.6521	-0.5108	0.633	-0.0669	0.2591	-0.06306	0.3425	0.2614	0.3978	0.04965	-0.1223	-1.8606	-0.7245	-0.3935	-0.3146	0.1975	-1.0716	0.1902	0.9653	0.2155	-0.05778	0.4302	0.9526	-0.1179	0.3476	0.1399	0.7283	-0.591	-0.1983	-0.6005	0.07566
INTS3	0.665	-0.1723	0.9553	0.8708	-0.3474	0.2413	0.1182	0.3383	0.613	1.4372	0.9797	0.8054	0.4488	2.1869	-0.2635	3.2192	0.713	-0.6528	0.2924	0.4247	-0.2897	0.1635	-0.2976	0.2656	0.3517	0.7698	-0.09045	0.1668	-0.1255	-0.4634	-0.0106	-0.4327	2.5043	0.2357	-1.401	-2.5187	0.1746	0.2569	-0.3066	0.5313	-0.748	-0.5971	0.2654	1.9861	0.04876	-0.5861	-0.04957	0.2664	-0.04131
RAE1	0.4832	-0.5656	0.05585	-0.6355	-0.0578	-0.6553	-1.7292	-0.2625	-0.7465	0.2713	0.4644	-0.1129	0.2843	-1.367	0.7951	-3.6883	1.1448	0.4543	-0.7234	-0.2661	-1.5101	0.9972	0.3471	1.2755	0.3489	-0.3075	1.0489	-0.2547	-0.7781	-0.6195	1.4236	-0.5084	0.3927	-0.3938	-1.5145	2.2215	0.1569	-0.3466	-0.6654	0.4385	0.2225	0.2212	0.9586	-1.3189	0.3087	-0.3603	0.3903	-0.5047	-0.6726
CDK1	0.229	0.6878	0.757	-0.3089	-0.377	0.1477	-1.4411	-0.03799	0.7724	0.6471	-0.1687	-0.2374	0.5523	-0.8788	0.4805	0.5102	-0.05186	0.1294	-4.8331	0.1889	-0.2864	-1.4445	-0.486	-0.9297	-1.7421	0.2868	-0.8942	-0.4608	0.249	-2.0495	-1.6321	0.5115	0.4423	-0.5935	-4.1323	0.5878	0.248	0.5917	0.6294	0.9329	0.8599	-1.0003	0.1277	-4.4556	-0.5121	-0.3941	-1.6336	-1.1655	0.885
RFNG	-0.4149	-1.2968	-0.9295	-0.6457	-0.3169	-0.06643	0.12	-0.5873	-0.02973	0.1933	-0.3867	-1.6931	-0.5442	-1.0194	0.6542	1.6453	0.1989	0.4608	1.6969	0.8424	1.946	0.3562	0.8722	-0.2766	1.6413	0.2074	0.4739	0.3591	0.111	1.711	0.1311	0.4722	-0.4131	-0.7815	3.4644	-1.5477	0.05133	-0.5231	1.0803	0.08243	-0.783	-0.1681	-0.5853	1.5466	-0.5898	-0.02706	-0.4107	-0.8705	0.8992
MICALL1	0.6365	1.1489	-0.744	0.02535	0.492	0.3288	-0.4962	1.067	1.2674	0.0314	0.8756	-0.4288	0.9461	-0.04614	-0.1218	-1.0628	0.1402	-0.5438	0.8909	-0.4154	0.5422	2.2068	0.1548	0.09687	-1.0493	0.6112	0.802	-0.5375	0.7258	0.8046	0.6012	-0.174	-0.5501	-0.872	-1.2956	-0.1927	-0.665	0.03964	-0.6646	1.0051	-0.0212	0.4562	0.7072	0.3316	0.1796	0.06508	-1.169	0.2204	-0.1002
SLC35A1	-0.07055	-0.1762	0.398	1.0227	-0.702	-0.02924	0.3015	-0.5007	-0.4247	0.8998	0.5529	0.5065	-0.5855	0.8072	1.0104	1.518	0.3211	-0.03541	0.5128	0.7813	0.4107	0.4454	1.0179	0.3347	1.0906	-0.9779	-0.1127	0.3953	-0.05018	0.4431	0.4194	0.6786	0.4517	0.2577	0.6828	1.0729	0.1266	-0.7287	0.5885	0.7464	0.987	0.9533	0.4238	0.2283	-0.2736	0.0766	1.5453	-0.7662	-0.7378
KLHL21	-0.5323	0.4983	4.4772	5.1916	0.6068	3.3143	4.335	2.6196	1.8427	3.28	-0.9975	0.549	-0.2546	2.3825	0.00145	2.4883	0.0994	0.6904	0.06402	-0.934	-0.5253	1.603	-0.466	1.567	1.7929	0.7209	0.5821	0.5458	2.16	-0.8768	0.3701	0.06788	0.7504	0.2658	2.5309	0.785	0.1805	0.9079	3.648	0.07689	0.2144	-0.2471	-0.2811	0.05882	0.5956	-0.7693	2.2502	0.2595	-1.0432
NIPSNAP1	-1.5077	0.4352	-0.5671	0.8871	-0.6942	-0.4802	-0.43	0.1766	0.2374	-0.3408	-0.1361	-0.7314	-0.2673	-1.0408	-0.5532	-3.0819	1.0575	1.233	-3.1618	0.2975	-1.6682	-2.7155	0.7287	0.06083	-0.008342	-1.1613	-0.46	-0.2049	1.5393	-2.5195	-1.9097	-0.0367	-0.1236	-0.7126	0.1965	0.1511	0.3584	-0.06912	-0.8323	0.4811	0.2533	-1.1019	0.7705	-0.1471	-0.4707	0.1038	-1.6581	-0.9296	-0.1496
BCL7B	-0.2714	0.1593	-0.2563	0.2272	-0.1775	0.3848	-0.2652	-0.7285	-0.1493	-0.7354	0.2801	-0.7843	0.5374	0.5396	-0.3843	-0.4418	0.009895	0.5696	-0.3516	0.4958	-1.4311	0.8095	0.2929	0.09044	3.5227	-0.9358	0.8051	-0.3756	-0.1143	-0.724	-0.01633	0.4017	0.5627	-1.5377	2.7006	-2.0151	0.01448	-0.5766	-0.2291	0.0852	1.633	0.6434	0.1242	1.7279	-1.3284	-0.5053	1.6966	-0.4167	-1.157
TLE1	-1.6502	-0.09545	-0.4992	-0.139	-0.8521	0.2811	-0.6769	-0.3918	-0.4993	-0.08615	-0.038	-0.4526	-0.8506	0.6877	-0.7193	-3.2789	-2.9085	-0.668	2.3265	0.7993	0.0106	0.1929	-0.1781	1.478	-4.1553	0.1298	-3.7102	-0.4283	-0.6938	-1.4072	-1.1746	-0.02304	-0.7009	0.545	-0.0246	-0.2961	-0.3571	0.3946	-0.7887	-0.3918	-0.01725	-0.7875	0.54	1.4182	1.279	0.696	-0.8693	0.8633	-0.7924
FZD7	-1.6519	0.6305	-0.06931	0.2228	0.1468	-0.06077	-0.3777	0.1194	0.5108	1.2875	-0.2458	-0.5423	1.5152	-2.3279	-0.3703	-1.3001	-1.5214	-2.0143	-3.9594	0.1793	-1.3005	-1.9968	-1.6216	1.4045	-1.8633	-1.3888	0.1621	-0.6393	-0.1199	1.6649	0.2411	0.04467	-0.8523	-0.3645	2.5864	-0.8122	0.938	0.05529	1.0348	-0.313	0.03205	0.5375	1.447	-4.2493	1.1065	2.3211	-1.4171	-0.7309	0.185
TIMELESS	-1.2044	-0.1066	-0.4022	0.9128	0.7563	0.1684	0.2594	0.4039	-0.0898	-3.8467	0.1436	0.0624	-2.8577	-1.448	-0.0485	-0.2918	-0.6309	0.4494	-2.3434	0.7628	-0.8621	-1.9177	0.3665	-0.5451	0.05355	-0.2478	-0.9373	-0.4488	2.317	-2.6992	-0.9346	0.1132	-1.7012	-0.04464	-2.0853	-0.9908	-2.2354	-0.2986	-1.9145	0.5901	0.4924	0.1369	-2.717	-1.8438	-0.6781	-2.1523	-0.6096	-0.08876	0.2596
COG2	1.0484	-0.6329	0.2063	0.3376	1.1851	-0.02884	0.1641	-0.1187	-0.09316	0.715	0.8838	1.0955	-0.489	0.3378	0.1599	2.0796	0.2623	1.2695	0.02768	-0.4388	-0.8121	-0.1287	-0.4914	-0.007049	-0.1154	0.4511	0.4585	-0.3997	0.5363	-0.3865	1.2564	0.1976	0.7478	0.1112	0.5669	0.2614	-0.4468	-0.002568	-0.5776	-0.5477	1.2656	0.8912	1.3112	-0.4501	-0.2456	0.5115	1.1437	0.3787	1.4105
DHX29	-0.3327	0.5483	-0.539	-0.1126	-0.2428	-0.3666	-0.5512	0.6953	-0.01013	-0.6058	-0.0613	-0.2288	0.5866	-0.4713	0.0957	2.3659	0.0265	0.2215	-1.247	0.2557	0.3209	0.5268	0.6745	0.04074	0.1286	-0.3998	0.1601	0.351	-1.0476	0.7062	0.305	0.1122	-0.7353	0.1308	1.689	1.2847	0.4814	-0.7989	0.5493	0.6291	0.1309	0.9111	-0.09989	-0.3626	0.5655	-1.2315	-0.04284	-0.3956	-1.7721
MMP2	-0.5734	-1.128	0.002203	-0.5063	-0.2483	0.5223	0.8611	-0.3542	-0.04763	1.2734	1.5127	-0.9927	-0.307	-0.3184	0.1373	3.0689	0.1903	0.07346	-0.1461	0.5069	-1.016	0.0658	0.1951	-0.5002	-0.2789	-0.5193	-0.04724	0.9555	1.1654	0.5486	0.6991	-0.07948	-0.9617	-0.5095	1.8478	-0.09607	0.06374	0.04052	2.5875	-0.2603	-0.8167	-0.2646	0.0073	-0.3493	-0.3822	-0.1952	-0.4966	-0.3597	0.9737
MRPS2	0.5887	0.0139	0.1481	0.548	0.2826	0.02249	0.6244	0.6514	-0.3917	-2.0877	-1.5562	0.1107	-0.2257	0.6444	0.9564	-1.1587	1.4126	0.3425	0.1553	-0.09696	-0.483	0.9505	0.9391	-0.6664	-0.3601	0.3219	1.3295	-2.3239	-1.1588	-0.1758	-0.2083	0.0271	-0.03482	0.08137	-5.6959	2.0332	-0.7161	-0.3803	-0.6039	0.02236	1.226	1.1355	0.7744	-4.2858	0.02442	-0.09247	-0.1626	-0.4408	-1.2415
KCTD5	0.1878	-0.6179	-0.357	2.0547	0.945	0.3028	1.3004	-0.129	0.5048	-0.5627	-0.1734	-0.8394	-0.4248	1.3545	-0.1269	-0.8334	-0.1547	0.7967	1.2978	1.4299	1.159	-0.7117	-0.5081	0.831	0.3342	1.8326	-0.2135	0.328	-0.08129	-1.3321	1.7288	0.06849	-0.7037	-0.1885	0.6846	-0.6516	-0.1136	-0.1402	0.0488	-0.1264	1.5726	0.08193	-0.1579	1.8863	-0.5265	0.9268	-1.6219	0.7572	-0.3151
TCEA2	1.2942	-0.4135	0.2744	-1.0903	-0.2204	-0.2202	0.08045	0.1634	0.01163	0.5698	0.5368	0	0.4103	-0.3838	0.5738	3.4166	0.6687	1.5864	0.4178	-0.09452	-0.9897	0.03115	0.6009	-0.44	0.5079	-0.708	0.1542	0.3648	2.0813	1.4539	-0.1359	0.8571	0.3283	-0.614	-0.3999	-0.05176	0.4105	0.0191	0.9903	0.4936	-1.6248	0.2041	0.02628	0.3001	-1.0884	-0.9276	0.1299	-0.4806	0.5344
CNPY3	0.04755	0.2136	0.3118	0.5828	0.0782	-0.5776	0.4593	0.9817	0.5912	1.0275	-0.3225	-1.1574	0.9727	3.9904	0.6521	0.7002	-0.2582	-0.4686	-1.087	1.2477	0.4264	4.3176	-0.8823	0.122	-0.4472	0.9288	0.2181	4.163	1.3954	-0.4128	1.307	0.5189	0.8657	-1.0278	-1.2769	-1.7039	0.3334	1.3637	1.4952	0.6156	1.3959	0.6893	0.3483	-1.4076	-0.2598	0.02005	-0.7781	0.03655	0.4919
FHL2	-0.9314	0.4815	-0.2977	-0.992	0.3372	0.2911	-0.691	0.2155	-0.3096	-0.3469	-0.4553	-0.8236	0.1158	-0.06842	-0.0937	-3.004	-0.3728	0.362	-3.8546	0.2623	-0.2092	-5.6407	0.6038	0.278	-1.1047	-0.9227	-0.4054	-0.4321	-0.3352	-1.6233	-0.6583	0.739	-0.0211	0.04169	-0.7807	-2.4612	0.2435	-0.5659	0.09674	0.6193	0.08205	0.5729	0.2474	-1.468	0.7182	1.0289	-3.4711	0.2923	-0.05008
ADAM10	0.9169	0.2846	-0.1067	-0.1596	-0.4024	0.6867	-0.6705	-0.3984	0.0732	0.0841	-1.0087	0.2129	-0.3254	0.2999	-1.3941	-1.6781	-0.3908	-0.5678	-2.1799	0.1789	2.0094	-2.5094	-0.4658	0.2458	-0.6139	-0.2928	-0.3998	-0.5637	0.5655	-2.1259	-1.8142	-0.02057	-1.0349	-0.1452	0.3751	-1.4098	0.07984	0.6363	2.9143	-0.02334	-0.03655	-0.7859	-0.1937	-1.4225	0.406	2.9388	-3.1315	1.5162	0.7266
FKBP4	-1.3225	-0.936	-0.251	-0.2655	-0.6594	-0.115	0.4102	0.07941	-0.3538	0.7179	0.5712	-0.7959	-0.4507	-0.9595	0.6792	1.8525	0.5619	1.1653	-0.7612	0.6527	-1.5625	0.2365	0.2919	-0.1279	-0.02893	-0.6457	0.7048	0.1067	0.512	1.4143	0.8059	0.1532	-0.1948	-0.2246	-0.1304	1.0185	0.3354	-0.786	0.6593	-0.05753	0.6884	0.8154	0.1722	-0.3357	-0.5229	-0.2334	0.1842	-1.0409	0.3991
CD58	0.1082	0.6739	-0.458	-0.1069	-0.4474	0.2867	-1.4681	-0.6021	0.0747	-0.2343	-0.6116	-0.0946	0.09597	-1.8885	1.2298	-2.7833	-0.7095	-1.3318	1.8116	-0.8856	-0.148	-2.4672	0.0339	-0.001755	0.8622	-0.1791	-0.4997	-0.5061	0.4345	0.3924	-1.3004	0.7062	-1.0626	-0.2892	-3.336	-2.2065	-0.1049	0.2993	1.0269	0.807	2.1518	-0.4115	-0.6679	3.8749	-0.7997	-0.3686	-1.523	0.4597	0.3826
KAT6A	-1.0229	-0.5303	-1.3553	0.3603	-0.1159	-1.0317	-0.72	-0.6616	-0.2113	0.3223	-0.8455	0.0378	-0.7394	-2.2278	-1.4654	1.4272	-0.3689	0.08647	-0.9845	-0.6801	-0.7495	0.5184	0.5583	-0.007421	0.4213	-0.9199	-1.098	-2.5958	0.06873	-0.5211	0.3453	-0.4164	-0.7177	-1.2397	2.4455	1.606	-0.8075	-0.4095	-0.8687	-0.6375	0.01345	0.7841	1.0464	-0.1928	-0.4855	-0.2971	1.3901	-0.6862	-0.9257
CDK7	-0.6741	0.5433	-1.4241	-1.6226	-0.7631	-1.0954	-0.9474	-0.5492	-0.3439	-0.4036	-1.3084	-1.3602	-0.5555	-1.0579	1.2498	-1.1671	-0.2774	1.2731	0.3085	-1.0459	0.3014	0.7667	0.858	0.2396	1.0916	-0.178	0.8093	-1.2553	-0.8589	1.4376	0.1801	-0.1496	-1.1093	-0.766	0.3167	-1.9848	-0.5452	-0.3484	0.3858	0.5602	0.5684	0.2775	-0.008643	1.9454	0.2002	0.1953	-0.04852	-0.4943	-0.3713
KIF5C	0.2337	0.3368	0.2095	5.4998	0.1254	-0.6492	-0.4069	0.5578	2.0993	0.716	-0.02745	1.7242	-1.1151	0.2677	1.1095	1.5206	0.3507	0.6295	-0.05599	3.2246	5.3498	0.9026	0.01335	0.8524	0.405	-0.4265	0.5066	-0.8618	0.8389	3.1542	0.9432	-0.3783	0.1856	4.1283	0.141	0.4549	-0.561	1.3242	2.9674	0.446	0.4825	-0.03083	0.8385	-0.5574	3.8255	0.05919	1.2171	-0.3262	-0.08164
HMG20B	-1.9609	-0.1945	-0.5961	-0.2012	-0.656	-3.2037	-0.2316	-0.03844	-1.7402	-0.6019	-0.9298	-0.5825	-0.3599	-2.219	-0.1084	-3.5658	-0.2046	0.153	-1.542	0.1993	-1.5189	-1.0579	0.3187	-0.8642	0.3765	-2.4751	-3.4084	-0.06064	0.9916	-0.2724	-0.05297	0.1999	-0.2317	-0.6808	1.7077	-1.2956	0.09838	-0.8156	-0.06742	-0.119	-0.9479	0.3659	0.2744	0.1886	0.0007625	0.04627	-3.6357	-1.2878	0.4029
MAP3K4	-0.6046	0.343	-0.9295	-0.7127	-0.6133	0.3307	-1.66	-0.0708	0.6139	-0.375	-1.5026	-1.7916	-0.6842	-1.3649	-1.2528	-3.0605	-1.2934	-0.7303	-1.1139	-1.8191	-2.1869	-0.4626	-0.1244	-0.1216	0.7014	-1.3294	2.7297	-1.7361	-1.1004	-0.7622	-2.1791	-0.5539	-1.4706	-0.06512	0.6239	-0.2957	-1.2877	0.7895	-2.1202	0.06299	-1.8542	-0.8148	-0.2913	3.2011	-0.02229	-0.4047	2.0837	-0.784	0.09802
PIN1	-3.4855	-0.1052	-0.9294	-0.15	0.00555	-1.0215	-0.0938	-3.3436	-0.8042	0.06265	0.2447	-1.0954	-0.4139	-1.6499	0.4814	-3.469	0.2449	0.7998	0.1906	0.2852	-0.976	-0.0159	0.6091	-0.7677	-0.2809	-1.1648	0.01787	-0.6963	0.1168	-0.2096	0.00562	0.5097	0.563	-1.4649	-1.2806	1.8958	0.05213	-0.6863	-0.5269	0.2717	-0.3125	-0.08992	0.4159	-0.08573	-0.2815	-0.8257	-2.1525	-1.2054	-3.3806
ZFP36	0.9559	-0.2239	2.4306	0.8892	-0.2521	0.7085	1.0772	3.2885	0.2281	-0.07075	1.3412	-0.7782	0.3218	4.2345	-0.4254	3.7269	0.3652	2.5753	4.4076	1.487	-0.9052	1.5475	-0.06525	1.4464	0.5199	0.1157	0.6661	1.3566	0.5867	2.0078	2.041	-2.3565	0.9045	0.4515	-0.2636	0.3028	-0.2457	0.181	0.7238	-0.4148	-1.2729	0.1678	-1.1233	0.2124	-0.2573	-1.0852	0.583	0.5226	-0.2402
INPP1	2.8879	0.0261	0.3334	0.4757	-0.0429	-0.6299	-0.2103	-0.2496	-0.3649	0.03735	-0.2469	-1.8516	0.0819	2.3308	1.1066	-0.3821	-0.836	0.1772	2.5529	0.1082	0.2077	0.4358	-0.3199	-0.06086	2.6642	0.6698	0.8989	0.4892	1.0215	0.5765	1.5833	-0.1167	-1.7397	0.5485	-2.0572	0.8128	-0.1287	-0.8408	-0.4856	0.05202	1.5747	0.6631	0.1466	4.8826	-0.2658	-0.4391	3.4477	-0.05601	-0.7354
LAGE3	-0.04294	0.5016	-0.233	3.4037	0.7585	0.0288	-0.4019	-0.4677	0.846	-0.5828	-0.03895	-0.8583	0.1271	-1.3651	2.0045	0.6421	0.2958	-1.4044	-2.4634	-0.5528	3.3797	-2.2091	-0.8418	0.7058	-2.1322	2.1094	-0.9264	-1.0585	-0.09208	-3.0303	0.218	0.566	-0.08155	-0.03522	3.6765	0.8825	0.7767	0.7029	-0.3635	-0.3681	-0.7437	-0.9543	-0.1726	-1.8353	0.5532	-0.0128	-1.0048	1.0811	1.2621
RAC2	-1.3558	-1.0947	-0.7013	-0.2721	-0.7744	-0.3323	-0.4036	1.0603	-0.5427	-0.5909	-1.1461	-0.0573	-0.9933	-0.08085	-0.8734	-1.0811	-1.087	-0.4628	2.6826	-1.1208	-0.2227	1.2382	-0.2059	0.1471	1.001	0.4191	0.6874	-0.2873	-1.0894	0.6391	-1.1566	0.649	-1.5273	0.5432	0.6703	-2.7524	-0.4751	0.1351	-1.6602	-0.4366	0.0834	0.5543	-0.04501	3.1449	0.7693	0.1826	2.4608	-0.549	-0.7381
TNFRSF21	-0.3582	-0.2203	-0.3452	-0.4827	0.0908	-0.5651	0.8327	-1.3134	-0.1886	0.7345	0.4897	-0.7061	-0.5051	1.4863	0.5591	1.244	0.8163	1.4152	0.1146	0.4108	-1.0161	1.2046	0.7281	-0.5823	1.7214	-1.1641	0.1485	0.4108	0.4638	1.6675	1.2066	-0.3356	0.06849	-0.4307	-0.4043	-0.8286	-0.2526	-0.7598	0.08511	-0.0675	-0.8621	0.4905	-0.1611	0.6873	-1.1242	-0.4592	1.6735	-0.6412	-0.22
HMOX1	1.9128	-0.3583	0.008363	-0.684	-0.2832	-1.1101	-0.1942	-0.4778	-0.5506	-0.08785	-1.2473	0.4793	-0.6328	1.5869	-0.0151	-2.9662	-1.1977	-0.597	2.8514	-0.7388	-0.1432	3.12	-0.5362	0.7685	2.858	-0.4256	-0.9786	-1.17	0.8368	3.5155	1.3435	-0.8487	-0.2479	-0.9643	-0.6616	4.537	-0.9314	-0.4268	-1.3402	-1.92	0.8137	-0.05008	0.258	9.9158	0.3046	0.186	7.357	-0.6388	-1.1897
KIF14	0.5584	-0.2659	-1.078	-0.606	-0.5246	-0.6145	-0.7205	-1.1128	-0.4952	-0.4954	0.2731	-1.0617	-0.4851	-1.0515	0.5358	-2.1046	-1.6323	0.09902	-1.8558	-0.2983	-1.043	-0.5352	-0.7002	0.7231	1.5837	0.1484	0.7225	-0.866	-0.2103	-0.4169	-0.6902	0.4965	-0.7611	0.4353	-0.3571	0.6561	1.0009	-0.1176	-0.2561	1.368	-0.6414	-0.1605	0.4365	-1.0195	-0.2684	0.1469	0.4022	0.1884	-0.09796
COL4A1	-1.242	-0.5536	-1.0561	-2.0598	-0.5991	-0.1359	0	-0.5096	-0.45	0.7863	-0.5536	0	-1.1698	-0.7411	-3.2438	-3.5412	0.9101	1.5785	-4.5663	-0.2302	-5	-7.2717	-0.2618	0.04825	-10	-0.4414	-0.5642	-0.9161	-0.1814	-7.1568	-0.7631	0.1969	-0.3845	0.2238	0.5965	-5.8955	-0.6401	0.1331	-0.6617	-0.2033	-0.5991	0.8275	-0.3867	-8.8757	0.7238	0.3372	-10	0.3443	-0.3928
DUSP6	1.2631	-0.1744	-0.4903	-0.09075	0.0218	-0.1594	0.1619	-0.3923	-0.5058	-0.1718	-0.5213	-0.5209	-0.2507	1.4126	1.6208	0.8245	0.5989	2.0939	3.4726	-0.6406	4.6328	1.9002	-0.1389	-0.9168	6.4066	0.6178	0.5714	0.279	0.5953	2.7578	0.3012	-0.7095	-0.09454	0.7772	-0.3579	0.5626	-0.3073	-0.379	-0.5787	-0.434	-0.4658	0.796	2.4369	8.2871	0.09237	-0.5189	4.5905	0.3243	-0.6294
CYB561	-0.9347	-2.1891	0.2743	-0.5983	-0.3791	-1.5613	-0.8668	0.2139	1.2779	-0.9908	-0.221	-0.6897	-1.5919	-1.47	4.1411	3.2265	-0.1235	3.0546	4.1408	-0.6354	3.561	-0.598	-0.7952	0.2934	-1.7127	-0.66	-0.04852	-0.8544	0.7524	-1.5399	-2.0722	-0.2713	0.2145	0.4715	-1.2763	-0.6544	0.03409	1.3543	-0.849	-1.9397	1.9439	-0.5495	-0.9302	-0.4242	0.5084	-0.9272	5.6295	1.0313	1.5143
EPB41L2	-0.4639	0.2806	-0.2555	-0.1948	0.6609	0.3583	0.6189	0.388	-0.07313	-0.4654	-0.8769	0.3062	-0.05479	3.015	-0.8578	-3.9207	-0.7646	-0.7229	-0.2226	-0.3463	1.3788	-0.4627	0.4286	0.1708	-2.4943	0.968	0.3657	-0.4201	-1.5584	-0.7076	-1.6798	0.01505	0.5934	1.0971	-0.2233	-1.2537	0.1217	0.846	0.01778	-0.4337	-0.1312	-0.4979	0.2961	-3.3958	1.1741	0.5208	-0.8603	1.1764	0.17
GNAI2	-1.1139	-1.0314	0.0698	-0.0182	-0.2127	-0.004153	-0.7628	0.2043	-0.2602	-0.2985	-0.2851	-0.656	-1.1682	0.41	-1.5142	-3.4788	-0.7347	0.7574	1.5548	1.3849	0.4017	0.3447	-0.4955	-0.7199	-0.6354	-1.6549	0.6559	-0.5945	-0.7168	-1.4964	-0.6304	0.1999	-0.112	-1.496	-0.07704	-2.0531	-0.1455	-0.1849	-0.8602	-0.6613	-1.7568	0.5674	0.6313	0.1189	-0.2693	0.3766	-1.6275	-0.9282	-0.1732
HTRA1	0.1623	-0.2119	0.3886	0.4989	0.6129	2.763	0.8425	0.731	0.861	0.9621	1.2348	0.0966	0.5354	1.2246	0.4569	2.3883	0.1477	0.9524	0.3064	0.4281	0.418	1.2891	0.178	0.2332	1.1631	4.4342	0.2202	1.1184	0.9079	0.7174	1.3931	0.3719	0.9019	3.3926	3.0429	0.433	0.2147	0.03041	0.8889	0.2086	-0.1355	0.2794	0.1046	2.1713	-1.1973	-1.0625	0.02072	0.0993	0.04572
TSTA3	-1.5721	-1.9453	-0.4812	-0.2005	0.6285	-0.4542	-2.1632	0.3686	-0.4675	-0.2862	-0.8512	-0.2168	-1.3103	-2.1389	0.2689	-3.8163	-1.5486	0.3906	-0.6106	1.0445	-1.1916	-0.799	-0.3727	-2.0648	-1.9622	-0.5308	0.3298	0.1093	-1.5049	-1.4239	-0.3535	0.2704	-1.3598	-0.2857	-1.357	-2.8058	-0.2171	-0.3722	0.2531	-1.7739	-0.5897	0.118	0.4593	-3.5484	-0.261	-0.1129	-0.8941	0.1781	-0.9178
WASF3	-0.06782	2.9824	2.4016	-1.4623	-0.8995	-0.7191	2.347	0.1079	0.215	-0.1787	-1.3786	0.883	-1.5385	-1.088	-0.3635	-0.9622	1.0268	-0.9188	-2.7774	-0.4861	2.2424	-1.0156	0.04945	1.4144	-1.4277	0.1947	-0.5915	0.8391	-0.8894	-1.4962	-1.364	1.2381	-0.5459	-0.2049	0.9872	3.0072	-0.9719	-0.1826	-0.5593	0.6351	0.5329	-0.5077	-0.05952	0.935	0.5498	0.608	0.003136	0.1822	-0.2163
DNMT1	-0.8559	-0.0218	-0.4315	-0.7673	-0.0622	0.6554	1.402	0.3495	-0.002631	0.273	-0.0701	-0.348	0.7185	-1.5458	-0.0537	0.6019	1.1905	-0.3445	-4.0231	-0.5459	-0.6584	-1.0678	1.8926	0.2637	-0.09578	0.6006	-1.8597	-0.3117	0.1722	1.5301	-0.933	-0.03562	0.1891	0.8079	3.2527	-1.3643	-0.7906	0.3697	-0.6923	-0.4288	-0.5881	0.171	-0.6055	-1.3024	0.6788	-0.5205	-1.3269	0.2495	-0.2461
TSPAN6	-0.529	1.0219	0.1815	-0.1834	-1.0613	-0.1769	-0.9696	0.2919	1.1885	0.3001	0.892	0.6098	0.3087	-0.4667	2.2213	-1.9877	1.2272	-1.2172	-1.9798	-1.235	-0.9102	-2.0192	0.3152	-0.3997	-0.1018	-0.1457	0.2233	0.2813	0.7289	-0.5377	-1.032	0.4542	-0.01163	-0.1061	-0.551	-1.4004	0.1538	0.4556	0.9837	1.2291	1.3182	-0.8127	0.04984	0.9852	-0.332	-0.08535	-0.224	0.1123	0.02335
FBXO21	-0.1704	-0.7239	0.1814	-0.6461	-0.6581	-2.0608	0.594	-2.6888	-0.06807	1.0867	1.2389	0.1857	0.003153	-3.3253	0.5034	2.8712	0.8616	1.6768	-0.825	0.8346	-1.2825	0.5485	1.038	-0.6506	1.6979	-1.7837	-0.3403	0.004791	-0.9302	1.9192	0.9913	0.376	0.1686	0.1363	-1.5104	1.7779	-0.4347	-0.4744	1.1024	-2.4033	-1.0784	-0.1298	-0.4429	0.06746	-1.6277	-0.3436	-1.1848	0.5017	0.604
RAB27A	1.3165	1.4951	0.419	0.4545	1.1475	2.6569	0.1571	0.4943	0.4148	0.0615	0.5245	-0.5444	-0.02873	6.2226	0.1927	2.957	0.608	-0.6141	1.8924	1.66	-1.7907	0.4599	0.4916	0.3469	1.4304	0.3315	-0.0008339	0.8459	0.3378	1.017	1.9601	-0.06343	-0.6185	0.3553	0.8503	-0.8111	-0.3967	0.3446	1.2277	2.5067	-1.0124	0.4073	0.3891	-1.1423	-0.6759	-0.4357	0.2405	-1.3022	-0.2554
DDR1	-0.6736	-0.6653	-0.242	-1.0308	0.03155	-0.07002	0.3744	-0.6463	0.2062	0.1165	0.3267	-2.9177	-1.4158	0.7322	-1.5391	4.0919	-0.4928	-0.02831	0.8771	0.1083	-1.524	-0.05665	-0.01275	0.7598	-0.1649	-1.4731	-0.4423	-0.3037	1.4244	-0.6915	-1.0726	-0.7669	-0.4809	-0.08957	0.281	-0.734	-1.1356	1.3822	3.2928	-0.9856	-2.4814	-0.06105	0.3224	0.1377	-0.3487	-0.9264	-0.02879	-0.7207	0.2071
PPP2R3C	0.1182	0.3304	-0.6805	-0.3678	-0.1397	-1.2911	-1.8854	-0.6536	-0.207	0.04265	-0.2688	0.386	-0.01753	-1.8337	0.6586	-7.7828	-0.2466	0.2494	0.6366	-0.9366	-1.0582	-0.3352	-0.235	0.1239	1.2954	-0.5195	-0.392	-0.6531	-0.2572	0.04295	-0.6824	0.2788	-0.5581	-1.423	-1.267	-0.44	0.1075	-1.6331	-3.0178	0.675	0.9516	-0.06017	0.4279	2.2385	-1.0529	-0.6175	1.8855	-0.9078	0.05327
ADRB2	-0.8081	4.4852	1.6535	2.2922	-0.3737	2.3115	2.9891	-0.273	0.7169	3.0983	-0.6937	1.0439	1.037	3.0582	-0.2049	0.6278	-0.07822	0.3732	0.6097	0.9614	1.5758	2.1139	3.8176	1.0324	1.4471	4.4192	1.3395	1.8126	1.4895	2.2245	-0.7134	-0.5206	-1.1078	3.8388	0.2869	1.0434	0.7799	1.6432	0.7507	-0.8248	-0.3532	0.01381	1.6174	3.7607	4.9461	-1.1658	0.5232	0.7416	1.647
LPGAT1	2.6838	0.07915	-0.5776	0.5043	-0.6474	0.4238	-0.9132	-0.3821	-0.2043	0.1796	-0.8068	0.5026	-0.6836	0.4316	-1.3744	-1.3228	-0.1148	-0.06808	0.05007	-0.6683	-1.6412	-0.04605	0.05445	-0.03007	-0.0206	-0.9162	0.6149	-0.7009	0.04968	0.5281	-1.2153	-0.3075	-1.7342	0.7835	1.2716	0.1923	-0.65	-0.08051	-0.8413	-0.2184	-0.04245	-0.08979	0.8508	0.8536	0.03179	0.09599	1.1226	-0.5252	-0.2372
DUSP11	-1.1134	-0.8368	0.2591	-0.4514	-0.04495	-0.1639	0.8545	-0.2118	0.2582	0.3662	0.3949	-0.6606	-0.1144	0.3969	1.0117	3.6527	0.6689	0.8298	-0.2552	0.4692	-2.5237	0.4341	0.4256	-0.7285	0.4714	0.129	0.5905	1.3016	-0.2838	1.1909	1.5086	0.1295	0.4304	-0.172	-1.7806	1.0698	0.1844	0.05065	2.2157	0.7366	-0.3903	0.4625	-0.5984	0.8643	-0.6988	-0.591	-0.1594	-0.288	0.3128
GRB10	4.5352	0.4247	3.9159	-0.1564	-1.0198	-0.02862	-0.9444	-0.3696	-0.1092	0.1776	-0.5215	-1.2342	-0.694	-0.347	-1.3656	0.2367	0.9631	-1.3451	2.8907	0.4967	3.0535	-1.9272	-0.2372	0.9625	1.525	-0.01207	-1.6251	-0.2001	1.5395	-1.6823	-2.3774	-0.09247	-1.0138	2.3717	1.933	0.4011	-0.08107	-0.2334	0.1977	2.1699	0.1666	0.4234	-0.5963	2.3865	0.233	-0.3684	-0.9051	-0.8287	-0.3156
MMP1	2.5048	-0.1874	1.1322	0.1297	4.5799	-0.01249	0.2278	1.4328	1.5471	0.3763	-0.3093	0.2424	2.9815	-0.1583	7.8684	2.8438	1.139	0.06135	9.9338	-0.5162	2.9183	2.3122	3.839	1.5352	9.9578	-0.2839	0.08922	3.5084	3.3396	1.2003	-0.3984	2.0399	-0.3855	-0.1472	-0.2895	0.747	-0.4882	1.897	2.7967	3.1577	5.0638	-0.5709	-0.5024	10	2.548	-0.4951	9.5312	0.7084	-0.1869
TP53BP2	-0.9329	1.0263	1.1674	1.0724	0.6517	0.6926	0.5913	0.9955	0.4262	0.04645	0.5771	-0.4322	1.1003	0.9342	-0.5325	-1.8322	-0.05128	-0.4039	1.5806	1.107	0.1807	2.242	0.4424	0.6967	-1.0126	0.374	1.2234	0.5067	-0.9435	-1.3606	0.07198	0.6483	0.1259	1.1496	-0.866	-1.5021	0.02307	0.5581	0.6898	0.5498	-0.04075	0.0821	0.3905	-0.224	1.186	0.1099	0.3415	0.7304	-0.3309
CDKN1A	1.4198	-1.4325	-0.5898	-1.5707	-1.2074	-0.4722	-1.0568	-0.6363	-1.2424	-0.2208	-0.4104	0.0232	-0.1752	3.272	-1.3347	-0.09681	-0.286	1.2846	3.9896	1.666	0.5054	-0.8835	0.2745	-0.5672	1.1177	0.4902	-0.8877	0.4074	2.8674	-1.293	-2.0765	-0.1091	0.421	1.3946	1.3498	0.5798	0.1465	0.3976	-1.2942	-0.2955	-0.5453	-0.01856	0.4536	3.7285	0.3497	1.3812	-0.2687	2.4335	-0.4873
ZW10	-0.6335	-1.0926	-1.33	0.1791	0.0989	-2.0275	-0.5148	0.2779	-1.1506	-0.9202	-0.3604	-0.3433	-1.2379	1.7454	-1.333	0.6737	-0.6987	0.5733	-1.0599	-0.3054	1.1193	-0.6436	-2.8688	-0.5765	0.4278	-0.3182	-0.9172	0.7814	-0.3046	-2.5038	0.03735	-0.6401	1.3884	0.138	1.7921	-0.5949	-1.1995	0.7354	-0.6806	-1.5922	-0.0876	0.5014	-0.2072	-0.9453	0.4498	0.2764	0.6255	0.1096	-0.5473
CORO1A	1.769	0.4584	0.2822	0.9738	0.7229	0.7127	1.6115	0.2829	1.3129	0.5529	0.7754	-2.0105	2.2117	1.8508	0.4089	4.3319	1.8314	0.5962	-0.4144	3.4014	-0.7747	1.1294	0.0714	0.08174	0.7499	0.04688	0.4509	1.1475	0.8515	1.1276	1.1226	0.3098	1.2999	-0.2592	0.8915	-0.3512	1.3838	-0.05812	1.6277	-0.07366	-0.2837	0.5546	0.7328	0.5943	0.06427	3.3061	-0.2575	0.5404	-0.5673
TJP1	-2.2177	0.6327	0.3152	-1.108	-0.4624	-0.1922	-0.8258	-0.06321	-0.004778	0.05	-0.4047	-1.1104	0.02944	-0.9292	-0.7846	0.9581	-1.6699	1.7505	-0.7297	0.3287	0.2833	-1.5403	-0.2567	0.7014	-0.3086	0.01009	-0.008485	0.2758	0.1286	-1.803	-0.4535	0.4513	-0.05143	0.235	2.5271	-0.2033	0.4173	0.1759	0.7032	-0.1443	-0.84	0.6296	0.6645	-0.3711	-0.03892	0.09194	0.07479	-0.3862	-0.5362
ABCB6	0.2158	0.688	1.7599	1.2796	0.7581	1.4961	-0.2053	1.4577	0.7454	0.9433	0.7617	3.5427	0.6034	-0.1476	0.74	1.6977	0.4832	1.9132	0.03922	0.6651	1.9034	0.2336	0.8687	0.4607	0.9982	0.2224	0.4792	0.5824	1.8778	0.9096	0.6036	-0.1455	0.6313	0.445	2.1541	-0.04198	0.2747	-0.336	1.5978	1.5265	0.5382	0.3193	0.1848	0.4212	-0.1384	2.1374	-0.04209	-0.6768	0.2931
XPNPEP1	-0.4225	-0.8721	-1.1773	-2.9407	-0.8199	-2.409	0.3018	-2.2736	-1.6226	-1.0488	-0.8431	-5.6719	-0.8784	-1.1221	0.198	-1.1648	0.6949	-2.7183	-1.0349	-0.5733	-3.9048	-0.4014	-0.7382	-1.2512	-0.5125	-0.5174	-0.5101	-0.909	-1.4986	-0.8021	0.111	-0.2596	-2.8343	-1.2304	-3.0886	-0.8572	-1.0389	-0.2508	-1.9201	-2.7937	-0.06235	-0.5917	0.01623	-0.3835	-0.5719	-2.2707	-0.7164	0.3448	-0.6932
MAMLD1	0.1247	0.7914	-0.113	1.0127	5.3138	0.2348	-0.3404	2.939	0.7298	-0.3639	0.4954	-2.4227	-1.1977	-0.2783	0.5108	3.2353	-0.3926	-0.3835	0.7749	-0.408	3.5458	1.1628	-0.0139	-0.4511	0.4268	-0.2506	1.3521	3.199	-0.7411	4.586	0.9805	-0.08211	0.3375	0.188	1.1528	2.162	-1.3213	-0.08184	0.3789	-0.3815	1.3831	-0.5386	0.43	4.7618	0.1455	-0.08952	6.8653	0.106	-0.3179
MTHFD2	8.4389	-0.8199	-0.4918	-0.8551	-0.9377	-0.5142	-1.6558	-0.7433	-0.5786	-1.31	-0.4168	-0.4105	-0.6127	1.3463	-0.4959	-3.5208	1.3696	0.9204	-2.1275	-0.7664	0.9299	-2.6594	2.5045	-1.3964	-4.7451	0.5216	-0.9895	-0.06051	-0.1919	-3.0008	-1.3737	0.2329	0.4378	-0.3579	-1.7109	2.8136	-0.4696	0.1389	-0.6116	-0.5687	-0.1254	0.1135	-0.4537	-6.1841	-0.5342	0.08666	-4.8321	1.4727	-0.6536
DSG2	0.4884	-0.2381	0.5439	-0.1531	-0.5411	-0.4112	-1.0745	-0.1132	1.1032	-0.1745	-0.113	1.4694	1.0754	0.7303	1.345	-0.7096	-0.3296	0.07912	0.5754	0.06728	1.4155	-0.2329	0.1619	-0.1242	-1.2241	1.0488	-0.3342	-0.2623	-0.198	-0.4555	-1.4566	-0.2624	0.4547	0.1578	0.0324	-0.4554	0.3296	0.5798	1.5125	0.2615	0.5735	-0.9679	0.1172	0.9303	0.1036	0.2297	0.29	0.6381	-0.3114
PRAF2	0.3163	0.8932	0.3077	0.5562	0.161	-0.03096	-0.2239	0.114	-0.3776	0.1384	-0.3206	-0.6964	-0.5799	0.7065	-1.2636	-3.1279	-0.4812	0.1494	-0.2675	-0.1272	-0.2399	-1.5958	-0.4711	-0.2341	0.6932	-0.3097	-0.922	0.1637	0.73	-2.2462	0.3627	0.8571	0.06845	0.8493	-0.5198	0.3079	0.4826	0.6961	-1.1124	-0.03849	-0.2886	-0.8043	0.3036	-2.7433	1.0739	0.0007772	-2.2668	0.2732	0.4573
DNTTIP2	0.08389	0.9146	0.3749	0.8132	0.6778	0.7144	1.4891	0.4937	0.4617	0.2904	0.326	0.1342	1.0289	-0.8327	2.273	-2.8157	0.9708	0.1647	1.1067	0.3291	-0.6061	1.3765	0.2594	0.5791	-0.7452	1.391	1.9219	0.1053	-0.4854	-0.07499	2.0421	-0.2719	1.4863	0.6002	0.2725	1.2273	0.03132	0.1489	0.3699	1.1772	1.3424	1.0706	0.5361	-1.0518	0.7282	-0.8026	0.6712	0.7625	-0.9419
SLC27A3	0.4936	-0.5146	0.1705	-0.07195	0.1242	0.0227	2.7509	-0.4532	-0.4313	0.7632	0.7307	0.6686	0.1723	0.8223	0.8336	3.766	0.6214	1.1518	-0.08732	0.4835	-0.9528	1.1334	2.7842	-0.2398	1.0392	1.4665	0.4927	0.8438	0.1602	1.5556	2.3783	0.7058	-0.1784	-0.1874	0.8627	0.5953	-0.05202	-0.1056	1.3205	0.1822	-0.2553	0.6325	-0.3695	1.0436	-0.5244	-0.1997	-0.4047	-0.4765	0.7648
CD97	0.2592	-0.2839	-0.1355	0.6346	0.6395	-0.5987	-0.443	0.2039	-0.4146	0.5783	0.3043	1.1583	1.9103	-0.481	1.0843	-1.4769	-0.04462	1.664	3.4095	0.2541	0.5924	2.371	0.6522	-0.06042	2.3592	1.173	3.2258	0.8113	0.1867	2.553	0.4019	-0.8901	1.0584	-0.7705	3.0296	0.6762	-0.9013	0.18	-0.5979	-0.1099	0.7784	5.661	0.6197	3.4386	0.1598	-0.3985	2.3181	-0.4824	-1.1477
HTATSF1	-0.7118	-0.8506	-0.3721	0.5723	-0.5261	0.4399	0.6499	-0.2173	-0.5559	0.7892	1.0832	-0.23	-3.4302	-1.3658	0.4799	3.9865	0.281	0.9071	-0.7998	0.5459	-1.0582	0.08295	0.425	-0.279	1.1292	-0.1278	-1.8956	0.4285	0.8696	1.2923	0.04161	0.09115	-0.6153	-0.3865	-0.9295	1.005	0.512	-0.227	0.8135	-0.1004	-0.8781	-0.1697	0.1158	-1.69	0.04743	-0.6862	-1.3922	-1.2793	0.5677
IL13RA1	-0.2218	-0.9217	0.4056	0.3756	5.7733	-0.5485	-1.0297	-0.9022	0.2214	0.09785	-0.6249	-1.6494	2.5449	0.5464	-0.7815	3.0553	-0.7559	0.976	-1.3903	0.8585	-1.0201	-0.9409	-0.6123	-0.4628	-0.1176	1.0152	0.8078	0.7484	0.1538	0.04729	-0.04252	0.002685	2.4095	-0.2517	0.6527	-0.3607	0.05111	-0.4627	1.0992	0.2895	-0.5116	0.4861	0.5365	-0.1609	-0.3789	0.4936	0.7554	-0.9107	1.3598
NCAPD2	-0.1568	-0.3803	0.8402	0.4339	-0.3536	0.4395	0.09605	0.4291	0.1916	0.507	1.0188	-0.6745	0.09148	-2.57	-0.6059	3.7972	1.1084	0.8867	-5.2736	0.5401	-0.3284	-1.1825	-0.4719	0.1432	-0.3425	-1.1249	-0.2936	0.5476	0.2122	-0.9532	-1.1156	0.2064	-0.5218	0.09469	1.4768	-1.2485	0.9163	-0.1988	0.3332	-0.6204	-1.049	0.2858	0.7647	-3.0329	-0.3276	-0.1799	-1.7997	-1.241	0.6768
AGL	-1.5998	0.5919	6.0288	5.5139	4.8545	0.6552	-1.2723	-0.5856	-0.1943	0.436	-0.5617	0.4438	-0.6702	-0.9999	-0.819	3.1886	-0.656	-0.7093	-2.1328	-1.0179	10	-1.4241	-0.6106	-0.06159	-1.2503	-1.3578	5.9881	2.7365	4.1961	-1.5054	-2.2604	3.1995	0.3735	-0.4278	0.4455	-1.2963	-0.6709	0.6345	-0.7101	0.5752	1.0705	-0.7031	-0.5538	-2.3036	-0.6674	0.01308	-0.4151	1.2497	-0.401
TMEM109	-0.15	0.08905	-1.0633	-0.07695	0.8261	0.2104	0.0003	-0.2863	-0.3688	0.1038	-0.8429	1.3626	-0.4019	-0.6547	-1.3461	-2.6943	0.6911	0.7564	-1.9124	-0.4869	-4.3014	0.3193	-0.8237	-1.7425	-1.566	0.2723	1.3344	-1.3673	2.3191	-0.3452	-0.145	-0.8076	-0.1696	-0.48	0.8817	0.3054	-0.5393	-0.3096	-0.6918	0.04028	-0.8676	0.8228	0.6184	-2.9078	-0.4414	0.1698	-2.5932	0.4756	-0.1186
CDC25B	-1.0579	0.06655	-0.2531	0.1667	-0.5559	0.7954	-1.1588	-0.3023	0.2059	-0.1759	-0.6438	-0.1587	0.2809	-4.0697	-1.2318	-3.7523	-6.8272	-0.4213	-2.5612	0.4798	5.1561	-2.4975	0.3771	1.1163	-0.6274	-0.3037	-1.3571	-0.4591	-0.1543	-0.2232	-3.4233	0.0972	-5.4427	-3.0335	-1.2289	-2.5278	-0.1847	0.2127	-1.5488	0.8333	-0.7348	-0.2321	-0.6257	-3.8397	-0.7758	0.2411	-1.9083	-0.7975	0.1046
ICAM1	1.2984	-0.0309	-0.4575	-0.8031	-0.3777	-0.8315	-0.4413	-0.3498	0.04697	-0.5551	-0.5189	-0.2948	-0.2128	2.2068	-0.8924	-0.9717	2.6623	-0.5576	4.5865	0.09415	0.3729	-0.9652	0.09925	-1.0845	-2.3376	-0.1318	1.3748	0.1499	-1.1488	-0.2459	-2.223	-0.05851	-0.3111	1.8848	-0.1884	-0.8157	-0.1087	0.5192	0.0316	0.05055	0.6999	-0.4646	0.02617	3.3761	0.1697	0.7245	-2.7645	0.617	-0.4011
GATA3	-0.3611	-0.4715	-0.5824	0.1935	-0.1038	-0.4867	-0.08915	-0.7463	0.5349	-1.5042	-0.7045	-0.0257	-0.5162	-1.0521	-0.9361	2.2422	-0.4724	-0.579	-1.2954	-0.9149	0.9036	-1.9428	-1.2643	0.4616	1.198	-0.03582	-1.0967	-1.3695	0.6826	-1.0107	0.1167	-0.3341	-0.5595	-0.1708	0.3249	-0.04158	-0.3848	-0.1329	-0.8662	0.3822	0.6104	-0.3784	-1.3606	-0.5353	-0.9254	-0.4497	0.8018	-1.6337	2.8531
NUP93	-0.7378	-0.3467	-0.592	0.5129	0.244	-0.2846	-1.2145	-0.2364	-0.7321	-0.4757	-1.5129	-0.9153	-0.01401	-2.1851	-2.4639	-1.57	-0.5288	-0.3565	-2.2485	0.2259	0.2718	-0.9168	-0.889	-0.647	-2.3193	1.3602	-1.1421	-0.3027	-0.832	-2.2785	-0.3249	-0.2788	-0.04554	0.5626	0.6958	0.9572	-0.5811	0.2448	-1.0223	-0.5185	-0.3112	0.04647	-0.2632	-3.456	0.3895	-0.9107	-1.1688	1.1349	-0.5035
PLA2G15	-1.3323	-0.1812	0.08376	0.0374	-0.9809	0.8957	0.06415	-0.302	0.594	-0.2846	0.1062	3.9371	-0.2336	2.8514	1.0854	-3.9016	-2.0881	0.8176	1.1287	0.9306	1.9172	1.5717	-0.6591	0.5903	-0.4118	0.4646	1.3313	0.4331	-0.229	-0.5974	-0.736	-0.7193	0.161	0.002895	0.9529	0.3029	0.7763	0.5359	-1.1154	-0.1588	-0.9182	-0.1204	0.953	1.1573	0.3155	1.7166	-1.416	0.7367	0.286
RPA3	0.9464	0.2453	0.8484	0.2966	0.0095	-0.1375	-0.6046	0.5504	0.03596	0.6597	1.1458	-2.2373	1.2133	-0.9793	-0.3875	-0.6468	0.3141	-0.6377	-0.6551	-0.1232	-0.9313	-0.4051	0.0848	-0.3874	-0.747	0.8367	-1.0262	0.7084	0.6844	-0.3944	0.5827	0.721	0.3708	0.5057	-3.0572	-0.9083	-0.3313	0.03782	0.8899	0.7863	0.63	-1.2539	-1.6548	-1.7966	-0.7428	-2.0516	-1.2582	0.2547	0.5512
PIP4K2B	-0.6654	-0.06555	0.3191	0.8951	-0.5512	0.51	0.3033	-0.06896	0.2892	-1.1983	-0.8135	-0.5657	0.6417	-0.0635	-2.2805	-3.7059	-0.3201	-1.3257	-1.1444	-0.5724	-0.149	-1.4496	0.3501	0.2763	-0.667	0.7717	-0.6486	-1.2308	0.1118	-2.9171	-0.5383	-0.0754	-0.3611	0.568	1.1035	-0.5061	0.0305	0.7034	-0.4967	-0.154	-0.9609	-0.4591	-0.4351	-0.3417	-0.5603	0.1501	-1.3253	0.9278	-0.8985
TES	-0.2019	0.0596	0.7302	-0.6556	-0.01335	0.5689	0.5036	-3.8413	0.7094	0.7477	0.3695	0	-0.2529	0.4537	-0.7732	0.9526	0.966	-0.4486	0.08712	1.1058	-0.2244	-1.0712	0.1146	0.2757	-2.7941	-0.08321	-0.4765	0.5163	-0.1312	-1.3719	1.5042	0.5463	0.2796	0.2474	-2.6214	-3.1804	0.09377	0.3147	1.9606	0.9024	-0.2007	-0.3542	0.09548	-3.0564	-0.37	1.0616	-5.1861	-0.0131	0.7622
MYCBP2	0.4564	-0.6883	-0.9529	-1.4548	-1.1041	0.4492	-0.9509	-0.1888	0.1475	-0.2557	-1.8382	2.026	-1.1899	2.814	-1.2041	1.6875	1.489	0.3878	-1.3847	-0.6603	1.1607	-0.8053	-0.3954	0.007997	0.1544	0.2738	-0.5161	-1.1435	1.1392	1.3049	-1.978	-0.9272	-0.8552	0.7908	2.0242	0.4669	-1.6981	-0.6538	-1.6519	-0.02977	0.2301	-0.1581	2.8038	1.5325	0.09386	0.3329	3.4875	0.3969	-0.4338
SPR	-0.2621	0.8529	0.4481	0.6569	0.6856	-0.6308	0.01915	-0.247	-0.3492	0.992	-0.03705	-2.7256	1.2072	-3.5721	1.0136	1.3787	-1.3	0.4456	0.5236	-0.1127	-2.0537	1.619	0.4141	-0.636	1.059	-0.2092	1.2255	0.7693	-0.5382	0.8146	0.8351	0.9651	0.838	-0.3272	-1.6173	0.8394	0.372	-0.2038	0.3846	-0.9071	1.1968	0.5325	-1.6443	-1.7504	0.7995	-1.2907	-0.8041	-0.5187	0.3489
PGRMC1	-1.8767	0.179	-0.9633	-2.213	-0.4067	0.001844	-0.5411	0.2304	0.2503	-0.3004	-0.5709	-1.8875	-0.3269	1.3594	0.532	-3.5412	0.6525	-1.2175	-2.5792	-0.6619	0.1649	-0.533	0.0744	1.9317	-1.0132	-0.05389	0.4278	-0.581	-0.005817	-0.724	-0.2409	0.4773	-0.8115	-0.1828	-2.1167	0.5804	-0.1507	0.04013	-0.1784	0.6089	0.8395	-0.3595	0.3554	-2.3033	0.5358	0.6257	-0.4449	-0.2744	0.6158
RELB	0.1111	0.7768	0.3627	0.2995	0.06315	-0.9465	-0.8542	0.00199	-0.2484	-0.4114	1.1158	-0.7379	-0.5669	0.9687	1.1499	1.2507	0.7487	0.6558	2.3912	1.0621	-0.244	0.4728	0.8553	-0.4352	-0.9694	-0.9378	1.38	0.2459	0.2642	2.2323	0.7405	-0.3202	0.9311	0.9257	1.7308	1.3331	-0.01249	-0.1257	0.297	0.8453	1.5705	0.4604	0.8204	0.8595	3.9654	0.3994	-2.1753	0.3368	-0.1882
AARS	3.5137	0.3474	-0.07272	0.611	0.5386	0.3518	0.3792	0.3097	0.02702	-0.186	0.3995	-0.064	1.0522	0.8158	0.5318	0.2268	0.1996	-0.7872	-1.93	0.5415	2.8338	-1.722	0.6303	1.0423	-2.5372	0.08221	-0.3428	-0.8287	0.244	-2.8197	-0.8226	0.454	-0.6116	-1.1734	-1.289	1.995	-0.01636	0.2236	0.1891	0.7245	-0.4437	-1.6852	0.09985	-4.087	-1.0709	-1.0498	-0.962	0.5222	-0.2179
EPHB2	-1.3719	0.0852	-0.7299	0.0167	0.1084	-0.1372	0.1788	0.02337	-0.08964	-0.4186	-1.0706	-0.3022	-0.5995	-1.6071	-0.5739	-2.3099	-0.45	-0.4744	-1.3907	-0.2246	-1.3233	-1.7617	-1.1505	-0.3149	-1.7052	-0.5527	0.0155	-0.8374	-0.1377	0.195	-0.3731	-0.3422	-0.5817	-0.1789	0.5949	-0.5068	-0.01831	0.08797	0.1803	0.7105	-0.1768	1.8534	-0.1693	0.2916	1.8294	-0.1176	-1.9146	-0.1583	-1.0228
GPC1	-0.1006	0.422	0.07417	0.06385	0.2035	0.1614	0.4281	0.9339	0.2991	0.1273	0.373	-1.178	-0.2209	1.0607	-1.6145	3.658	-0.7504	-0.5766	-0.4342	1.705	-0.1205	-0.0754	-1.2996	1.1555	-1.62	-0.3182	-0.2625	0.6159	0.334	-0.1085	0.9454	0.7078	-0.04557	-0.5527	-0.8998	1.3171	0.5502	0.01531	0.8427	0.5384	-0.3128	0.3442	-0.06212	-1.4043	-0.07885	1.1142	-0.5427	0.1917	-0.7672
RPIA	0.8096	0.5796	0.6164	0.3976	0.7799	0.2659	0.6755	0.5881	-0.08104	-0.02105	1.0677	1.5007	1.1209	0.3601	-0.00645	-2.1266	0.8591	-0.511	-1.541	-0.7374	-4.5297	0.0277	0.1435	-1.74	0.2961	1.3928	0.2579	1.0455	0.8045	0.3326	-0.06248	-0.00731	1.1653	0.5625	-0.5058	0.7037	0.607	0.6607	-0.4128	0.4381	0.2148	0.3829	0.01866	-0.9322	-0.2317	-0.7394	0.08071	0.9202	-0.1598
ELAC2	-0.599	-0.6872	-0.3421	-1.2761	0.1548	-0.2328	0.1203	0.1293	-1.1387	0.642	-0.4412	-0.601	-1.1562	-0.7458	0.6876	-0.2542	0.6373	1.3561	-0.3486	-0.187	-5.3698	0.6571	1.0273	-0.05597	1.1095	-0.8429	0.8566	-0.9498	-0.08807	2.4802	0.3821	-0.1348	-0.7339	-0.376	-0.5775	1.6432	-0.3218	-0.8332	-0.6687	-0.446	-0.5192	1.1008	0.2932	-0.3386	0.3653	-0.08717	0.8068	-0.7765	-0.3164
GPR56	-1.282	-0.0349	-0.714	0.2172	-0.556	0.6056	-0.3566	-0.07519	0.3192	0.2498	-0.4336	-0.729	-0.9513	-1.5439	0.9531	2.3048	-1.4639	-1.5861	0.9132	0.03028	0.9374	-3.0129	2.1933	0.09585	2.6616	1.6988	-1.7769	-0.1877	0.7081	0.06827	1.0149	0.02921	-0.625	-1.027	0.9963	1.7136	-0.4052	-0.1746	0.239	1.9481	1.18	0.1518	0.1315	2.6808	0.3248	0.1688	0.0008792	-0.7813	-0.1363
NVL	0.2513	-0.5623	0.4009	-0.4931	0.5789	-0.3204	1.4743	0.4447	-0.4352	-0.0913	0.3652	0.281	-0.1763	1.2743	-0.00645	2.4064	1.0484	1.7111	-1.0992	0.08324	-0.9002	0.8285	0.3788	-0.4736	0.104	-0.2653	0.4984	1.1457	0.6182	1.7808	1.3688	-1.0689	1.8362	-0.1838	1.9587	1.5774	-0.4878	-0.1172	0.2538	-0.2369	-0.3109	0.694	0.5213	-0.03831	-0.9106	0.9348	-1.0891	-0.9945	0.1329
PLSCR1	-0.5268	0.1602	0.02756	-1.1595	-0.3162	0.01542	0.48	-1.3755	-0.6114	0.1841	-1.1748	0.6986	-0.8679	-0.2295	-0.8803	-0.3278	-1.859	1.148	0.2968	-0.5961	1.0977	-1.9078	-0.2629	-0.6227	-0.5606	1.2876	-0.177	0.07892	1.385	0.1184	-1.2846	-0.1685	-0.2797	0.1911	0.9841	-1.3627	0.3683	0.1426	-0.3109	-0.2146	0.4281	0.4825	-0.1123	-0.1905	-0.2957	-0.1393	-1.6858	0.9349	0.1297
CHEK1	-0.2641	-1.0324	-0.2931	-1.1876	0.2509	-0.2755	1.2689	-0.567	0.2136	0.3991	-0.3178	-0.1442	0.1287	-1.2108	-0.4387	3.0999	0.5969	-0.727	-0.667	-0.247	5.4315	0.4427	0.678	1.2473	3.6699	2.2114	-0.9089	0.5845	-1.0624	0.1443	-0.3763	-0.516	-0.5755	3.6697	2.3505	0.9028	0.2233	0.8719	0.4153	-0.203	-1.4116	-0.7928	-0.2693	-1.3788	0.8186	-0.7658	-1.9726	2.796	0.9786
CTSL1	0.1027	-1.047	-0.6186	0.023	-0.1531	-0.6781	-0.187	-0.2565	-1.3966	-0.7921	-0.6041	0.2497	-0.7052	-1.5971	-0.1302	-3.9758	-1.7623	1.3122	3.9803	-0.4718	-4.4009	2.7789	-0.0782	-0.0002036	-1.458	1.2737	-0.05197	0.166	-0.06017	1.5486	-0.6112	-0.5801	-0.3442	-0.1362	-0.4043	4.2771	-0.6711	-0.8442	-1.0275	-0.771	0.341	-0.02818	0.3743	7.8556	0.2774	-0.469	3.2542	-3.2025	0.1807
CTSD	-0.05484	-2.1007	-0.8214	-0.955	-0.4486	-0.5053	0.4019	-1.0516	-0.6362	0.3461	0.0331	-1.8957	-0.8584	-1.2022	-0.9025	2.5593	-0.4699	1.1362	0.03801	0.4536	0.4876	-0.0473	0.1156	2.3196	0.1818	-1.1051	-0.3683	0.3452	1.4946	0.9704	0.2648	-0.1284	-1.2315	-0.1293	0.7448	2.3811	-0.7888	-0.4825	0.5288	-1.88	-2.4739	0.4787	0.08022	0.06743	0.3422	-0.05064	-0.8789	-1.6539	0.3802
ME2	1.1238	0.4499	0.3415	1.6389	-0.1969	0.2388	-0.8267	0.4304	-0.3887	-0.7597	-1.461	1.3529	-0.2812	1.0641	-1.4266	-2.0129	-0.1636	-0.4571	0.2747	-0.03589	-0.3814	1.7561	0.2777	0.3728	0.03661	1.6897	0.4876	-0.9085	-1.4952	-1.1622	0.1655	-0.5517	1.7731	-0.3631	-0.008258	2.2313	0.2875	0.5512	-1.9294	1.1208	1.8997	-0.1015	0.6929	-0.1451	0.2906	-0.5768	-1.2086	2.6804	-0.983
ARHGEF2	1.9732	-0.3241	-0.7319	-0.01755	-1.3958	-0.6879	0.2901	-1.432	-0.6996	-0.1586	-0.1465	-1.9201	-0.2495	0.9395	-0.2697	-0.9535	0.317	0.7621	2.0823	-1.3559	0.9511	0.3347	-0.6251	0.1656	0.7885	0.2993	-0.2676	-0.1973	-0.7083	-0.4757	0.1109	-0.454	-2.0808	0.334	2.1221	0.09768	-0.9364	-0.6728	-0.5644	-0.9922	-0.9578	0.632	-0.3564	2.6002	-0.05318	-0.2262	1.1822	-0.03725	-0.9384
PDGFA	1.5332	0.4884	-0.3022	-0.2278	1.2887	-1.1342	-0.9711	-0.5944	0.9365	-0.447	-0.584	1.9898	-0.3145	-1.5571	-0.8005	0.2138	-0.5029	1.0273	1.8456	0.7277	-1.1745	0.86	1.7276	0.1554	-0.5105	-0.6538	0.2478	-0.9378	-0.2073	0.08267	-0.2022	0.3207	1.2685	-0.5818	0.2966	0.7419	0.5118	0.501	-1.3537	-0.3835	0.2394	-0.2034	0.3516	0.5094	0.6295	0.4838	2.3057	0.4575	0.5193
ILK	0.7748	0.5816	-0.01964	-0.2186	0.8699	0.154	0.617	1.1215	-1.3348	-1.0977	0.5387	0.7304	0.6135	-2.014	-0.2666	-3.221	-0.1109	-0.4692	1.4752	0.8829	0.4186	1.8451	-0.1797	-1.0096	-1.0862	-1.1662	1.1165	-0.5823	-1.5458	-0.07084	0.365	0.9068	0.561	-0.8331	0.6039	-3.2359	0.4335	0.03388	0.7591	0.8149	-0.0441	0.8755	0.03105	0.373	0.2229	-0.4249	1.7958	-0.4737	0.4936
WDR67	1.0667	5.2522	-0.4773	1.2151	-0.4345	-1.7401	0.0958	-0.6047	0.8877	0.2456	0.1464	-0.8773	-0.2137	-0.06805	-0.4918	2.9821	0.5448	0.2246	-2.5754	-0.1464	-2.6632	-2.5879	-0.7427	0.2495	-0.4872	-0.1619	-0.8788	-1.7815	-0.06366	-1.8462	-1.6437	-0.136	-0.1852	-0.07122	2.9399	2.9187	0.07389	0.1224	-0.2	0.2384	1.347	0.4398	0.08192	0.9458	0.4516	-1.166	0.3151	-0.1882	0.72
NFIL3	-0.2185	0.9658	-0.0117	0.5585	-0.7038	0.5049	-0.7801	-0.1007	0.7384	-0.4036	-0.2243	1.7823	0.08616	-1.0861	-0.1569	2.1482	-0.8125	-2.0005	5.2746	0.3015	2.5279	-1.0226	0.681	0.6728	-2.1356	0.1486	-0.8976	-0.2539	-0.05743	-1.7589	1.0907	0.4214	0.6885	-0.6286	0.254	-0.8341	1.0898	0.8264	2.7318	1.0579	0.5963	-0.6777	-0.1327	2.6254	2.1211	1.457	0.3825	1.1103	0.7907
RFC2	-1.1406	-0.915	-0.1619	0.6414	-0.6348	-0.6905	-1.4157	0.2059	-0.4612	-0.4853	1.0908	-5.6299	-0.4343	2.1447	0.01035	-3.5404	0.3261	-0.3432	-1.8512	0.1604	-3.0216	-0.8435	-0.9071	-0.7524	0.1241	-1.3276	-0.6417	-0.5848	0.7957	-1.0431	0.4779	-0.5156	-0.4176	-0.5855	-0.8564	-4.3166	-1.9014	-0.3154	-4.7623	-1.8341	-0.5185	0.7634	-0.155	-4.7308	-2.831	-1.0928	-5.3334	-0.9923	0.2331
ARL4C	-1.0156	-0.1522	-0.1377	0.7522	0.149	2.1119	0.2172	0.04831	0.1142	0.498	0.4156	0.0573	0.1523	-0.03535	5.1069	-1.3168	2.3931	-0.1818	3.0181	-0.4576	-2.5355	1.9226	0.1894	-0.8834	7.0098	0.02545	0.5702	0.3698	1.2465	3.8314	0.7383	-0.3457	-0.5193	-0.5991	-0.2618	1.2763	-0.2735	-0.3548	0.1171	-0.1027	0.6249	0.184	0.07424	8.3182	-0.6935	-1.1559	5.7259	-0.8231	-0.4232
TIMM9	0.7562	0.6028	-0.9136	-0.3454	-0.2526	-3.3636	-1.1331	-0.4129	-2.1649	0.358	-0.4724	0	0.2722	-2.3553	-2.4756	-0.1473	0.1435	0.03758	-1.0299	-1.1692	-1.1164	-0.01295	1.2656	-0.2787	-1.165	0.2071	-3.2289	-0.2327	-0.1032	0.07513	-1.0326	0.5704	0.08235	-0.6542	-0.08631	2.3418	-0.1914	0.1371	0.2009	1.0541	0.7689	-0.3888	0.48	-2.7641	0.4092	-0.3874	-1.4524	-2.0459	0.2971
CPNE3	-0.1111	-0.3928	0.2394	0.6495	0.101	0.6068	-0.9463	-0.3632	0.06802	0.2273	0.3163	1.359	-0.1035	-0.06919	1.7255	-0.369	-1.5308	-0.5195	1.6973	0.2482	-6.128	2.8039	0.5246	-0.4189	5.6693	0.9131	1.7248	-0.2416	-1.3639	4.5761	-0.1734	-0.2527	0.4832	0.6193	1.3716	1.8904	-0.04145	-0.1223	0.4122	0.3925	-0.8708	0.005122	0.2389	6.2691	-0.3373	-0.6201	3.9996	-0.4638	-0.4818
ORC1	-0.5	-1.173	0.1275	2.6708	-0.3285	-0.2622	0.9593	0.4491	0.178	0.7958	0.4162	-0.8135	0.4895	0.8291	0.348	2.4112	0.8035	1.8106	-1.0763	-0.3145	0.7357	0.6499	0.2458	-0.01813	0.7701	-0.4081	0.204	1.0712	0.633	1.4028	1.1738	0.0365	0.4597	-0.02325	-0.1476	0.05864	-0.1308	0.1614	0.3677	-0.6554	0.3865	0.1934	-0.1497	-0.448	-0.4995	-0.2864	-0.7894	0.007807	0.6003
C5	0.09239	-1.2896	0.2986	-0.6477	-0.3492	-1.0945	-0.6999	-1.0916	0.1333	-0.8183	-0.4165	1.668	-0.08895	0.2937	0.0219	3.1082	-0.01523	0.4188	0.161	0.1067	-0.3476	-0.4013	-0.477	-0.2051	1.2253	-0.0115	-0.8241	0.3092	1.2436	0.8319	0.615	0.07607	-0.2843	-0.005049	1.4511	-0.928	0.02212	-0.191	-0.07951	-1.3916	-1.9667	-0.1725	-0.2686	-0.6203	-1.2871	-0.1776	-0.335	0.03157	0.8071
PARP2	-0.5118	0.1791	-1.2543	0.6175	-0.07245	-0.2277	-1.3256	-0.5224	-0.8554	-0.6906	-0.2604	-1.0868	-0.0201	-0.3293	0.4543	-4.1966	-0.1505	-0.6386	-0.5646	-0.7188	0.4186	-1.3954	-0.2991	0.6989	-1.2153	-0.7318	-0.3028	-1.6717	0.08778	-2.2598	-0.07214	-0.695	-0.2518	-0.9231	0.6061	0.4585	-3.6544	-0.8212	-1.1987	0.186	1.5442	-0.3436	1.036	-2.7228	-0.3255	0.02208	0.5112	-0.9525	-0.3857
FASTKD5	-0.8413	0.1018	-0.6202	1.1802	0.1869	-0.3063	0.4198	-0.02937	-0.4211	-0.5796	-0.7846	-1.2541	-0.4157	-1.5038	2.4696	-3.3909	-0.5093	-0.7755	-0.4325	-0.4541	-0.9617	0.5047	1.3894	1.0038	-0.1772	-0.9173	0.2146	-1.5127	-1.3747	-0.2545	1.2544	-0.1501	-0.2191	0.528	1.0603	0.2125	-0.2381	0.3919	-1.4492	-0.7316	-0.2213	0.991	0.8338	-0.9415	-0.1119	-0.4883	1.7535	-0.84	-0.4037
SCRN1	-0.03618	-0.3316	0.6179	0.2477	0.5108	0.7864	0.9636	0.518	-0.6044	0.5889	0.6283	-0.1824	-0.4406	1.8134	-3.1938	0.5398	0.3334	1.6948	0.9505	-0.003756	-0.8485	2.3126	-0.7988	0.8132	-0.3323	0.418	1.0137	0.2711	-0.4029	0.4328	-2.1198	-0.5276	-0.4606	0.5719	-0.6405	1.9921	0.1049	-0.6749	-1.3554	-0.9115	-1.1672	0.4652	0.9457	-1.4001	0.4015	0.1662	2.0582	0.73	-0.8953
MAN2B1	-1.1032	0.52	0.2989	-0.2637	-0.5846	-1.0422	0.6035	-0.5216	-0.4979	-1.2944	-0.6312	1.0188	-1.1405	-0.6011	2.2898	-1.7691	0.3747	2.2316	-1.2518	-0.3543	5.5607	-1.0846	-0.0482	1.2776	4.258	-0.447	-0.5425	-0.5053	0.4219	1.5196	2.4139	0.1851	0.7426	-0.009747	1.0425	0.1754	0.458	1.6208	5.0567	2.7982	0.1096	0.329	-0.1642	0.75	0.2741	3.5697	-1.0318	0.2091	2.8872
PTPLAD1	-1.345	-0.374	-0.3761	-0.2287	-0.1103	0.2819	-0.1805	0.03132	-0.1011	-4.5445	0.112	-2.2984	-0.0677	1.8184	-4.4556	1.0071	0.4263	-3.844	-1.223	-0.54	-0.0407	-1.5057	-0.1482	-0.9778	-6.6154	-0.4634	-0.8566	-0.6612	0.3674	-4.5902	-4.6303	-0.1066	-1.2194	0.01885	-3.6435	0.373	0.01132	-1.6942	-6.0487	-3.466	-0.4599	-0.3814	0.1281	-2.3124	-0.06149	-2.3304	-0.9533	-0.6084	-2.9226
MSRA	1.9032	0.4062	0.3673	-0.8228	-0.2885	-0.03575	0.3075	-0.3702	0.6597	-0.6339	-1.0933	0.143	-0.1923	1.5537	1.1456	-0.2885	-0.5232	0.5392	0.4345	-0.4759	-1.0529	0.3727	3.9489	0.295	1.523	-0.3982	-0.9424	1.1349	1.8268	1.5108	1.0695	-0.005681	0.5725	0.08703	2.5918	0.921	0.2069	-0.2011	-0.5029	0.5742	-0.3666	0.1457	0.002187	4.4182	0.233	0.1201	0.4159	-0.278	0.8504
NFKBIA	1.0799	-0.2582	-0.3566	-0.7843	-0.3426	-0.8462	-0.7092	-0.4716	0.047	-1.2375	-0.8573	-0.6979	-1.0021	-1.1806	-1.065	-1.8363	0.19	-1.408	2.4835	0.7724	-1.4755	-0.8115	-3.5986	-0.8602	-3.3712	-0.6668	0.2419	-0.4749	-0.4913	1.2623	-0.3921	-0.05454	4.4878	0.7362	-1.0908	-1.4662	-0.8073	0.1418	-0.9877	-0.1688	0.7635	0.9088	0.2063	-0.7198	-0.2839	-0.4898	-4.978	-0.07988	-0.2256
DCTD	-0.6512	-0.4377	-0.9481	-0.02615	-0.1328	-0.9561	-0.0565	0.04268	-0.6334	-0.0657	-0.5348	0.8104	-1.1126	0.4745	0.2808	-3.3288	0.3791	1.8255	0.7154	0.1314	-1.6602	0.6898	0.3129	-0.6656	1.3589	-0.8332	0.8643	-0.1647	-0.2335	0.8111	-0.5775	-0.5469	-0.2275	-0.7458	1.8024	-1.4135	0.09355	-0.8299	-0.7211	-0.5148	-0.2087	0.7767	0.5381	0.8557	0.1335	0.04861	2.145	-0.8703	-0.3177
SYNE2	3.623	-0.06385	-0.08449	-0.6133	0.2078	0.2312	4.4964	0.5801	-0.2851	-0.2311	-0.3732	0.3694	-1.5956	0.5735	-0.8412	1.1757	-0.985	-0.5403	0.3466	3.9327	-1.0273	4.9027	0.3382	-0.3132	-0.3807	2.7015	-1.3948	-1.4546	1.1283	0.6559	-0.7107	0.2156	-0.7964	-0.01037	1.2258	-0.6228	-0.6045	1.3975	0.06461	0.207	-0.1568	-0.3916	0.08201	-0.001171	-0.6028	0.3198	0.5895	-1.1134	2.6658
MBNL1	0.4493	0.0062	0.6502	1.1016	0.2124	1.0877	-0.5253	-0.04397	-0.4267	0.07015	-0.0229	0.2873	0.1567	0.4784	-0.4651	-2.232	0.03297	1.1429	-1.5547	0.3839	-0.2316	0.7528	0.4232	0.7606	-0.1832	-0.6664	0.4385	-0.1588	0.4589	0.3549	1.1436	0.1243	-0.004106	0.1013	1.1808	-0.2147	-0.7371	-0.08946	-1.1076	0.1946	-0.0055	-0.07567	0.4934	-0.478	1.1299	-0.2863	-0.02087	-0.6629	0.4398
UBE3C	-0.6106	0.6761	-0.4967	-1.2711	-0.0747	-1.0149	-0.1388	0.2194	0.4028	-0.1608	-0.1527	0.9621	-0.2177	-0.5162	0.5892	-2.1211	0.09219	-0.6258	-0.8279	-0.5306	-0.09815	-0.7177	0.1125	-0.4781	-0.2187	0.3707	-0.2295	-0.8862	-1.9036	-0.4411	-0.5724	-0.224	0.3092	0.5445	-0.8412	0.736	0.6025	-0.2552	0.09431	-1.2113	0.8685	0.1464	-0.1987	-0.3776	-0.3043	0.649	-1.1232	0.6594	-1.877
CCDC92	0.03695	0.7715	0.2966	-0.6424	-0.6698	0.1841	-0.5362	0.5963	0.218	-0.6517	0.3233	0.665	-0.8552	-0.7819	-0.813	-1.7911	-0.7285	2.2463	3.5806	0.6532	-0.8749	-1.0997	-0.5152	-0.4454	1.6994	-0.4964	-1.3669	-0.6771	0.9194	2.3644	-0.9494	0.2855	-0.7501	-0.6674	2.8781	2.1725	-0.7868	0.407	2.5047	2.8582	1.1235	0.01769	-0.2479	5.8954	-0.9973	0.1998	-0.04353	-0.6915	2.6608
MYCBP	1.5192	0.7577	-0.4997	-0.5426	0.3932	-0.703	-0.8092	-0.1278	0.04919	-0.8249	-1.7049	-0.2379	-0.428	0.07368	-0.2892	-3.7699	0.5363	-4.1077	0.2997	-0.6435	-0.6662	-0.3099	-0.3611	0.1888	0.07763	0.2621	0.08095	-1.0184	0.2043	-4.0661	-1.8319	0.08906	-0.9325	-0.3737	-5.3015	1.7992	0.2379	-0.3192	-0.2381	-3.4514	0.3327	-0.531	-0.7104	-1.1979	1.1012	-1.4147	-1.4525	0.5785	0.9507
CXCL2	1.2076	0.4378	-1.5616	-0.6061	0.092	-0.1136	-0.4917	0.2924	0.05385	-0.4716	-0.03255	-0.8537	0.4323	0.6729	0.5252	0.3304	0.3	-0.05875	7.7413	0.2942	3.0729	1.3067	0.2785	0.5995	-0.1174	1.232	0.3899	0.6831	0.1689	1.038	0.005354	0.3864	0.08595	0.1706	0.6295	0.4457	-0.1647	1.1756	3.2483	0.164	1.5476	2.607	-0.04005	3.9315	0.007243	3.5746	2.9233	0.231	-0.6831
PTPN1	-1.1014	-0.8754	-0.3022	-1.3711	-0.0285	-0.4676	0.152	-0.3982	-0.7839	-0.2736	-1.039	-0.481	-0.492	1.4438	-0.8318	3.0179	2.2062	-0.3012	0.3022	-0.4054	-1.8471	1.579	-1.0119	0.624	0.4362	0.4034	0.4478	0.6831	-1.0524	0.4648	-0.2361	-0.2872	-0.5914	-0.545	0.7122	0.8652	0.335	0.06414	0.3072	-1.4103	-1.5228	0.6469	-0.2635	1.3098	1.0637	0.3865	0.7427	-0.159	-0.002162
BRP44	-2.6778	1.0923	0.8019	0.7772	1.2507	0.8097	-0.2428	1.105	1.0921	-0.2323	1.388	0.2667	1.6596	2.9067	0.2774	0.4257	0.02698	-1.2967	0.4554	0.8449	0.0215	0.6448	0.2503	0.8707	-1.1235	0.02331	0.4605	0.3737	0.3475	-1.1007	1.4799	0.9526	0.2297	0.2739	-3.193	0.6518	0.8913	0.4996	1.1846	1.1997	1.5544	-0.05727	0.1707	-2.9343	-0.4725	-0.2774	0.08146	0.2478	0.6176
TIMM22	4.6426	-0.1411	0.4667	0.9445	0.86	-0.2277	0.1352	0.5972	0.269	0.6442	0.7781	1.6357	0.285	-0.1353	-0.35	1.0943	0.1388	0.2179	-0.6686	0.4165	-0.3189	1.8306	-0.7552	0.3621	0.9723	-0.2357	-0.3962	0.2228	-0.5588	0.05282	1.8253	0.4714	1.348	-0.3341	2.1327	3.0222	-0.09687	-0.2472	-0.7009	-0.9815	0.187	-0.3732	1.1683	2.7725	0.1785	-0.7574	-1.0345	-0.3354	-0.9001
ATF5	-0.6336	-0.1089	0.3312	-0.739	0.33	-1.0133	-0.4036	-0.2026	0.2353	-0.3387	-0.6599	0.1098	0.2657	2.0557	-0.6852	1.019	0.5674	0.6173	0.3815	0.3751	0.2093	0.5799	-1.5266	0.2095	-0.08057	0.3482	0.2044	-0.5978	-0.6887	-0.05324	0.2626	1.1743	-0.3177	0.5867	-1.0496	0.4367	0.3496	0.04101	-0.4307	-0.2097	-0.3108	0.2225	-0.1291	-0.0736	0.1693	-0.1709	1.5535	0.1841	0.8808
ECD	0.4164	0.3108	-0.08149	-0.2632	-0.5087	-0.3251	0.0719	0.1819	-0.349	-0.2495	0.0295	0.7797	0.1914	-0.3486	0.7907	-1.561	0.2292	0.07064	-0.9574	0.1909	-0.0907	-0.5861	-1.0756	-0.1152	0.04411	-0.0438	0.4651	0.134	0.4556	0.4803	0.2407	-1.1058	0.8005	-0.2582	1.0952	1.2338	0.345	-0.3922	-0.4301	0.7532	0.5924	1.0279	0.577	-1.8886	0.2105	0.04912	1.0222	-0.005963	-0.9453
CIRBP	-0.6555	0.1118	-0.4506	-0.03785	-0.1579	-0.2382	-1.3308	-0.5697	-0.3347	-0.09185	-0.8083	-0.2944	-0.3375	-1.5205	0.1707	-1.2342	-0.1864	0.883	-0.1113	0.1185	-1.7677	-0.1449	0.01575	-0.4709	0.4221	0.1212	-0.7329	-0.4173	1.0428	-1.3644	-0.4256	-0.2108	-0.8838	-0.08062	0.5281	0.6903	-0.5484	-0.3295	-0.5971	-0.4989	-0.7801	-0.2149	0.9822	0.3022	-1.0638	-0.7637	1.8429	-0.6244	-1.7269
NSDHL	0.6867	-0.5189	0.2001	0.7851	-0.6496	0.01425	0.8464	1.5479	0.1944	-0.5382	1.0085	-0.8355	0.2559	0.241	-0.7975	0.2885	0.4127	0.5462	-0.07793	0.3824	0.1093	-0.7989	0.7016	0.008692	-0.9359	-0.3879	-0.1039	0.4138	-0.5285	0.1615	-0.09015	0.9053	0.0914	0.2908	-1.1449	-0.1631	0.5217	0.6033	0.7807	0.7045	-0.1109	-0.5512	0.1735	0.2195	1.1829	0.7489	0.4141	-0.176	0.7115
ADI1	-2.8454	0.3699	0.3621	-0.039	0.6899	-3.0992	-0.3977	0.3195	0.5453	-0.2874	-0.2134	-1.5638	-2.7768	0.8602	-3.8454	-1.4064	0.6011	-0.3935	-1.1202	-2.3587	-0.3607	-4.6723	0.3744	0.2293	-0.3536	-0.8391	-0.0474	-3.3782	-0.5707	-0.6482	0.2868	0.4695	-0.4284	-0.372	-3.3764	1.5244	0.7064	-1.3872	0.1872	0.7675	-3.3273	0.5731	0.375	-0.2014	-2.442	-0.3104	-1.8568	-1.1888	0.6433
NFKBIE	2.5316	-0.7283	-0.2185	-0.594	-0.3071	1.4742	0.2138	-1.0675	-0.3399	-0.1762	-0.4402	-1.6893	2.1269	0.8562	4.4536	3.5173	-0.09892	-0.2502	-0.2827	2.5935	-1.9949	2.7348	-0.8232	-1.5822	-0.7752	-0.749	0.1846	2.2478	-1.1921	1.5637	1.0312	-0.1258	-0.2435	0.3597	1.4582	-0.498	-1.0738	0.7228	-0.01195	-1.9223	4.8871	1.1658	-0.437	-1.1875	-0.5742	-1.678	1.0648	-1.0838	-0.3826
ADCK3	0.9738	-0.4513	0.5364	1.0083	-0.2408	2.7381	0.189	2.9267	1.5956	-0.05485	-0.2493	-0.9119	3.5557	-0.5373	-0.0074	2.4134	0.5128	3.6831	-0.6169	0.2219	0.7019	-0.5871	-0.0484	1.0546	0.1515	0.3513	2.6825	-0.678	0.829	-0.7934	-0.5595	-0.06038	5.9199	-0.5765	0.0768	4.421	3.6164	-0.2453	-0.3749	3.9017	5.65	-0.5265	0.8344	3.1508	1.1974	8.3171	1.4144	0.7903	0.04613
PRSS23	-1.8165	0.07905	-0.04892	-0.5853	-0.1126	0.105	-0.0091	0.3222	-0.6198	0.1031	-0.7403	0.4825	-1.135	-0.4569	-1.9367	-3.5907	-0.7831	0.4146	-6.8166	-0.2877	2.5412	-5	-1.3516	-0.04519	-3.4706	1.1938	-1.8873	0.04663	0.842	-3.4497	1.4366	0.1882	0.01497	-0.0678	0.815	-3.405	-0.4528	0.4299	0.2126	0.06529	-0.4689	-0.03964	-0.4309	-4.9635	0.02384	-0.3393	-5.7853	1.1559	0.03841
CCNH	1.4314	-0.05505	0.0391	-0.0694	0.0671	-0.9908	-1.3278	-0.7245	-0.2698	-0.1129	-1.0296	-0.2319	0.9065	-3.3947	0.882	2.2078	0.2353	-0.6553	-2.0256	-0.9134	-1.5357	0.8563	-1.0815	-0.6116	-0.5559	-0.1072	0.1247	-0.4455	-1.3247	1.2004	0.448	0.3093	0.1596	-0.4822	-1.955	0.1245	-0.3908	-0.282	-0.01269	-0.9467	0.1829	0.03375	-0.2263	-2.4451	0.04136	-1.3092	0.5698	-0.8637	-0.6781
GDPD5	0.001875	-0.5505	-0.3174	-1.7271	-0.1457	-1.5715	0.9689	-0.1072	0.1717	0.5591	-0.3142	-0.1653	0.9422	1.1643	1.0768	3.5148	-0.7878	0.6793	1.9204	-0.5696	-1.0136	2.3512	0.6345	-0.1992	0.8322	0.66	1.119	0.3471	-0.6977	0.8611	-0.1905	-0.1964	-0.3557	0.6052	-0.8635	2.2192	1.0812	-0.1922	0.9272	0.3191	-0.2694	0.6032	0.3625	0.5698	2.0389	0.4704	2.2357	-0.6658	0.3443
P4HA2	-2.9077	-0.3523	-0.5931	-0.8369	-0.5238	-0.4896	-0.3743	-0.8894	-0.2249	-2.4363	-3.0064	-0.1712	-0.9289	1.7582	-1.6162	-1.0445	-1.0251	-1.5488	2.3242	0.1698	1.5398	-0.9609	-0.5889	-0.6764	-4.1966	0.6804	0.5221	-0.2855	0.02003	-4.2337	-1.6121	0.262	-0.5513	-1.2066	-2.4932	-0.9829	0.1985	0.2928	0.6801	-0.09778	0.5419	-0.006584	-0.2495	-3.1216	-0.04315	2.5734	-3.0372	0.9157	0.6685
TARBP1	-0.3722	0.2885	-0.9175	-1.0654	-0.312	0.2538	-0.2385	0.2431	-0.09028	4.2973	2.3899	-0.2053	-0.9036	-1.744	1.1836	-0.6509	-0.8642	1.3442	-0.6227	-1.0661	1.0745	-1.3284	0.4218	-0.123	0.0606	2.0031	-0.8148	-1.0783	0.8614	-0.2792	-2.625	-0.546	0.2634	-0.7608	1.6791	0.1003	-0.9169	-0.1196	-1.9951	-0.999	-0.0369	-0.000968	1.4882	-1.0077	0.08511	-0.1407	0.9095	-0.1537	-0.6519
ATP6V0B	-0.755	-0.3432	-0.1124	-0.3765	0.0299	-1.0914	-1.8603	-0.7039	-0.64	-0.579	-0.7445	-0.413	-0.9601	1.8275	0.7821	-3.9882	0.1487	-0.2041	2.1115	-0.3945	-0.1875	1.4493	0.7629	0.6459	-0.2051	-0.7073	0.5122	-0.3544	-1.2238	1.9971	0.2603	-0.3851	0.0515	-1.2238	-1.3152	1.0283	-0.3145	-0.646	-1.2314	-0.8134	0.5222	0.3768	0.5546	1.2629	-1.4255	-0.8862	0.2399	-2.1765	-0.1304
RBKS	2.9392	0.0872	1.8972	-0.3715	2.1695	-0.6485	-1.0531	-0.3386	1.0515	0.05785	4.1396	0.3994	0.8057	3.3128	1.0168	1.6743	-0.5862	1.0119	3.4115	0.5448	3.9559	-0.4178	3.258	0.6204	1.039	0.1326	-0.4575	-0.6005	-1.1405	-0.3225	0.07809	-0.3178	-0.4296	-0.6794	2.2394	1.1826	0.8625	0.228	0.4467	-0.3798	0.2145	-0.3011	0.4383	0.5925	-0.7637	0.1435	0.8033	4.5373	1.6093
CAPN1	-0.9422	-0.2764	0.953	1.1932	-0.258	1.2121	-0.3123	-0.5895	0.2861	0.1279	-0.7073	3.1562	-0.9564	0.7855	-0.1104	1.6592	1.516	0.1478	0.09675	-0.7563	0.0682	0.6705	0.6221	-0.5431	-0.5238	0.5883	0.5438	0.6	0.3843	-0.03924	1.3577	0.2101	1.2764	1.3681	0.01323	-1.1201	-0.3364	0.4616	0.6476	1.0461	-0.6241	0.3729	0.1293	-0.1891	1.4593	2.1949	-0.4531	0.997	0.01526
KDM3A	-0.001537	0.3422	-2.7489	-3.5132	-0.2171	-1.6967	-0.6036	0.3552	-0.8046	-0.3374	0.6759	-4.5844	0.6416	-1.5413	2.9894	-0.1443	-0.8317	0.5283	-0.4298	-0.2528	1.0112	-0.3156	0.1347	-0.4308	0.8668	0.7449	0.2174	-1.1457	0.5774	1.2284	-1.1807	-0.3421	-1.7692	-2.6799	0.8421	0.4733	0.8897	-1.4525	-1.1049	-0.3546	1.6004	0.06044	0.07663	0.3241	-1.9218	-1.2046	1.5048	-1.4944	-0.268
BID	-2.1565	-1.5161	-0.5311	-2.9742	0.6199	0.3227	-1.0175	-1.539	-1.1543	0.3532	-0.2267	-3.9325	-0.7414	1.7462	0.4261	1.1718	-0.03866	0.05756	0.1209	-0.02184	-2.9046	0.8607	-1.0796	-0.7474	-0.5451	-3.6066	-0.8302	0.6137	-1.2909	1.3707	-0.998	-0.8336	-1.2162	-1.098	-1.3705	-0.7279	-1.1276	-2.7466	-0.1262	-3.4894	-0.9135	-0.1655	0.5039	-2.073	-0.9041	-2.2213	-0.9447	-3.2447	-2.5345
STXBP1	1.17	0.6653	0.232	1.9682	-0.412	-0.6038	0.6637	1.0573	0.3029	-0.7018	-1.2264	1.6998	-0.2377	1.4044	-0.6352	-1.8394	-0.7944	-0.004887	1.9761	-0.5364	0.2092	-0.1407	0.7643	0.368	1.0121	1.4572	-0.103	-0.4181	-0.4403	-1.001	-0.1638	0.1448	1.356	0.2379	0.5291	2.0974	0.3384	1.1625	-1.2321	1.6124	0.9723	-0.57	-0.08279	1.9447	0.4619	1.6617	0.5456	1.4251	0.8642
ITGB5	-0.9076	0.6436	-0.4629	-0.5711	-0.02335	0.1995	-0.2465	-0.1692	-0.372	-0.0702	-0.00305	-1.1593	-0.6595	-0.5456	-0.0791	-3.673	0.1867	0.4431	1.3409	-0.6416	0.4757	0.2647	0.6505	-0.6744	1.7836	0.1072	-0.464	-0.4473	1.2433	1.8395	-0.3673	-0.0006472	0.04755	-0.7734	-1.5565	-1.0238	0.3055	-0.2543	-0.5385	-0.7212	0.1158	-0.2245	0.09722	2.5717	0.07375	0.2583	0.3477	-0.505	-2.0723
MTF2	-0.1308	-0.3487	0.2488	0.05405	-0.6828	-0.1252	-0.8368	0.1161	-0.2296	0.5786	-0.3733	2.0459	0.4961	-0.348	0.6565	0.4109	-0.1893	0.2879	-1.0959	1.2235	-0.1091	-0.5729	-0.02925	0.7525	-0.842	-0.4522	0.08298	-0.1434	-0.2626	-0.2371	0.7379	-0.4652	-0.6161	1.395	-0.1904	1.4535	-0.4836	0.1051	-0.1363	0.6815	-0.2943	-0.1461	0.2372	1.1307	1.4337	-0.5638	-1.0911	0.6081	-1.1549
HLA-DRA	-0.7025	2.9564	-0.2575	0.3884	0.9632	0.643	3.4848	-0.4692	0.6642	-0.2483	1.8482	-0.7431	-0.2916	-0.2696	1.495	4.7597	0.7916	1.2519	-0.3596	0.1056	2.4227	-0.1368	1.7822	0.5373	0.3681	4.0766	-0.03059	0.1318	1.6692	0.7294	-0.5067	0.669	1.9878	0.07611	0.5483	0.9042	1.4405	-0.04042	0.691	-0.2264	0.2052	0.8294	0.3686	0.1517	1.0371	0.521	0.5124	0.7405	0.5875
SLC11A2	0.5417	-0.1553	0.2361	0.8217	0.09555	0.1571	-0.9542	-0.1941	0.491	0.3255	0.2325	-0.4003	0.004175	0.1017	1.8577	2.7171	0.4494	0.8375	0.9692	-0.5255	-2.4158	0.108	1.2912	0.8644	-0.6618	-1.9799	1.2416	-0.3038	-0.427	1.4443	0.6078	-0.7077	-1.1627	-0.05425	1.5153	0.2189	-0.1198	-0.0434	-0.09497	0.4568	0.8757	0.3826	-0.8663	0.2522	0.591	0.1924	1.5235	-1.2141	-0.1374
PDIA5	-2.2517	0.2975	0.11	0.6988	-0.0295	0.1119	0.0033	-0.3757	-0.2133	-0.9068	-2.0159	0.1939	0.4421	1.7246	-1.0769	-2.4941	-1.6359	-0.9027	0.6965	0.4152	1.4063	-1.2391	-0.3972	-1.3445	-1.5088	0.5475	-0.7189	-0.5146	0.4407	-2.0318	-1.7734	-0.1665	-0.6218	-0.4965	-1.0508	-1.3433	0.7627	0.9633	-0.9717	0.487	0.1367	-0.1015	-0.8075	-0.464	-0.07507	0.2366	-2.0927	1.3223	1.6207
PIK3C2B	-0.7493	0.627	0.7211	1.4653	-0.5739	-0.7203	-0.0156	-1.062	0.4053	2.2311	-1.3697	0.2948	-0.3971	0.1147	-0.6016	4.273	-0.2737	-0.7862	-1.1597	0.5821	-0.3992	-0.369	-0.188	-0.006	-1.1432	-0.6324	-0.04823	0.2908	0.2234	0.3716	-0.6316	-0.2678	0.1677	-0.5352	0.1044	0.2931	0.7091	0.02667	1.761	0.841	0.0214	0.4001	1.1476	0.3519	0.1548	0.303	0.2478	-0.66	0.7026
RAP1GAP	1.0676	0.3249	-0.03472	5.5505	0.1647	3.5388	-0.7512	0.2519	1.8625	1.0394	1.5136	-0.9747	0.742	0.6443	2.5711	3.8605	0.8942	0.4557	0.9175	3.5496	5.4512	1.153	0.3909	0.7154	6.7355	-0.09268	0.8508	1.7104	0.8704	4.3199	4.4442	0.04344	5.1163	0.3571	1.715	3.8952	-0.6697	2.3853	3.0176	1.4322	0.8275	0.286	1.2118	0.8643	0.1232	0.8815	0.2054	1.8242	0.077
SLC25A46	-0.9721	0.8454	-0.3282	-5.1975	-0.8194	-3.0191	-0.9448	0.2338	-1.22	0.7575	-0.4048	0.3372	0.1101	-0.3515	0.2176	-3.3503	-0.4814	-1.643	0.7094	-3.3663	-4.7497	0.1341	0.6992	-1.33	-6.5694	0.4724	1.1763	-0.1506	-0.8854	-2.563	-3.7103	-0.1742	-4.9421	-0.6055	-1.2203	-7.4167	-3.2693	-2.2823	-1.8776	1.0019	1.4119	0.1145	0.4596	-0.9795	0.5226	-3.3428	1.9651	-2.0506	0.6741
CDK19	-0.1497	1.9499	-0.3804	-0.7861	-0.9584	-0.9309	-1.0965	-0.605	0.03559	-0.7452	-0.241	-0.4131	-0.1049	0.1984	1.4003	-0.1036	0.2006	0.4528	0.09005	-0.3107	-0.7979	-0.3829	0.5193	-0.00268	1.7156	-1.5768	-0.4355	-1.4098	-0.6501	-0.3972	-0.3531	0.1233	1.2056	-0.7103	-0.1674	1.118	-0.5169	-0.04981	-0.7895	0.2455	-0.6405	-0.6866	-0.09685	1.3616	-0.2892	1.3727	1.5123	-1.3852	0.202
NOLC1	0.09542	-0.6458	-0.5546	0.683	-0.2384	0.002532	-1.0133	0.1037	-0.7949	-1.135	-0.5804	-0.0674	-0.5323	-2.6039	-0.6253	0.01929	1.0202	-0.3284	-3.6534	-0.459	1.3496	0.3921	-0.453	0.2065	-3.1611	-0.2458	0.3991	-1.2585	-2.4479	-2.1849	-0.2123	-0.3363	-1.1873	-0.04536	0.93	1.581	-0.6585	-0.2924	-2.7096	-1.5192	-1.3967	0.4162	0.881	-3.2778	0.7671	-0.2786	-1.0859	0.2604	-1.5428
CAT	5.6472	1.1665	0.7928	0.7838	1.0211	0.8423	-0.01175	1.1781	1.1055	0.9418	0.6095	-0.2769	0.3284	-0.4912	0.9224	2.4205	0.8765	-0.9556	-1.6374	0.5395	-1.2253	-0.7401	1.1314	1.1414	0.3778	0.3207	-0.0226	0.7413	1.2341	2.2373	-1.5126	0.6649	0.9907	0.6894	-0.6744	2.2378	0.5854	0.2275	1.0478	1.4814	1.7388	-0.6812	-0.5391	-1.0957	0.4643	0.7766	-0.6606	-0.142	0.6775
KIAA0753	-0.87	-0.8745	-1.131	-0.3235	-0.3947	-1.0026	0.8802	3.8319	-0.6423	0.9058	-0.307	-1.0186	-0.8519	-0.9984	-0.743	3.1673	0.1169	1.1911	2.9316	-0.4388	-2.8173	1.3579	0.3503	-0.5771	2.3043	-0.3485	-0.9105	0.09573	0.6119	2.0462	-0.4609	3.3353	-0.1979	0.2546	1.6303	0.8917	0.5431	-0.1564	-0.3869	-0.07809	-0.1344	0.0132	0.3645	0.2171	-1.0591	-0.1164	1.1433	0.03305	-0.2955
DUSP14	0.5662	-1.0499	0.06716	-0.0766	0.0894	0.0658	0.6755	0.4939	-0.9737	-1.3748	-0.279	-4.1218	1.1239	3.0042	0.9308	0.8842	0.7491	1.2251	-0.4035	-1.4864	-0.2341	2.3475	0.379	0.7547	-1.1759	0.5352	1.4611	-0.6693	-0.7701	-1.4818	2.5786	-1.1524	1.1927	-0.2042	1.0221	1.7247	0.1225	-0.2706	-0.9306	0.5605	-0.5561	1.4078	0.2883	-0.7532	0.8025	-0.2578	1.5297	0.4235	-1.2032
KAT6B	0.3342	3.0085	0.516	0.5386	0.0239	0.6757	-0.4679	1.2232	2.6198	3.0792	0.4413	5.6869	0.7995	-0.4261	0.0089	1.1569	1.257	-0.4526	-1.1966	2.5699	2.9337	0.3744	0.02885	0.0811	1.9009	0.4314	0.08457	1.8815	0.1251	3.4474	0.4614	1.7142	1.6317	1.9367	-1.3207	0.4608	0.08454	0.02912	1.3644	0.4194	2.3289	-0.3644	0.2601	-0.2211	0.1158	-0.004297	0.4781	1.2614	0.3951
CHN1	-0.2131	0.00135	-0.9351	-0.7154	-0.7812	-0.06492	-0.6761	-0.1763	-0.9691	-1.6827	-0.6611	-0.7042	-0.6862	-0.2837	1.3487	1.2473	0.143	0.8	-0.1117	-0.8563	-0.9108	-0.1592	-1.1679	-0.8534	-0.06004	0.3293	0.04418	0.09497	0.2228	-0.01669	0.728	-0.4568	1.5125	-0.2223	-0.5027	0.9939	0.3909	-0.9537	-0.4418	-1.4954	-0.8467	0.05101	0.3187	-0.1702	0.08516	-0.5778	0.7746	-0.08883	-0.4469
HMGA2	-0.1424	-0.5981	-0.1653	0.5033	-0.05045	-0.7351	0.1601	-0.6476	-0.4131	-0.5184	0.0996	-0.1708	-0.5453	0.564	1.6192	0.05362	-0.444	2.4147	4.9678	-0.2959	-0.4747	5.0486	-0.0723	-0.5285	5.9041	-0.09252	1.8544	0.07069	0.03934	4.8162	0.614	-0.7107	-0.6059	0.3197	-0.4125	3.1432	-0.8558	-0.2567	-1.3742	-0.2346	-0.0006	0.697	1.1003	7.0883	0.09766	-0.6212	6.3308	-1.1124	-0.7351
IGFBP3	-3.6396	-0.2574	0.2065	-1.5929	0.1301	0.2729	0.1533	0.05595	-0.04705	-0.4435	-0.716	0.6353	-0.4277	0.8747	-3.6359	-1.5889	-1.3554	-1.1145	-6.553	0.5919	2.1716	-2.8724	-0.6151	0.4225	-6.6254	0.1228	-0.5868	-0.0001683	-0.2282	-7.5309	-0.01282	0.6887	0.4926	0.1025	0.3885	-3.5882	0.4011	0.2596	0.7525	-0.1754	-0.612	0.2283	0.09813	-4.7738	0.5358	1.3704	-4.2228	1.1813	0.9971
MAPK13	-2.2761	-0.8941	0.1622	0.1949	4.7573	-0.6623	-0.6837	-1.1695	0.4883	-1.5625	-1.771	-0.1485	-0.6809	0.6939	1.2896	-0.7598	-2.3983	0.1981	4.9172	0.1024	-0.0499	4.4942	0.7566	-0.007782	2.7477	-0.2285	-0.02369	0.3757	2.425	-0.1282	-1.0512	-0.7836	-0.0879	2.8453	-0.1721	-0.5753	-0.4801	-0.555	-1.779	-1.513	-0.9671	0.2198	0.7114	8.3338	0.2056	0.02001	4.6539	0.05694	-0.2268
TRIB1	0.2816	-0.5015	0.4772	0.1549	0.1616	-0.1025	1.0545	0.05324	0.1147	1.047	1.0131	0.64	0.5047	1.2016	1.5329	3.7925	2.5428	1.6745	2.8859	0.1591	4.8931	2.4943	0.4895	-0.0556	2.3509	2.9453	0.7433	1.0925	-0.1809	1.5937	1.6475	0.4733	0.426	0.6274	0.08939	0.937	0.2636	-0.08583	1.8405	-1.1485	-0.8091	0.5801	-0.8256	3.4849	-0.8234	0.06167	1.9901	-0.1594	-0.1582
UFM1	-1.1254	-0.3834	-0.1904	-0.5139	-0.3247	-4.3881	-1.4469	-0.4085	-1.4326	-0.4662	-1.1853	-0.4529	-0.6009	-0.035	-0.4452	-3.1742	-0.6249	-0.6275	-2.9681	-4.6044	-4.7837	1.7069	-0.8279	-0.8114	-0.6623	-1.5142	0.2242	-0.3479	-0.725	-1.4777	-2.1672	0.03201	-0.1859	0.3783	-3.1962	0.3062	-0.3328	-0.1363	0.2851	-3.3707	-0.3361	-0.5105	-3.5352	1.1272	-0.3281	-0.2867	0.8153	1.1748	1.9245
GNA15	-0.1716	-0.3166	2.1385	-0.2077	-0.1939	0.5179	0.5175	0.1896	0.8	0.5952	1.2803	3.2661	0.2099	1.1219	-0.1483	2.9926	0.7105	0.7513	0.3314	0.5417	-0.7506	0.8687	0.4133	0.5939	0.799	0.6692	0.9025	1.0085	1.5086	1.4248	0.6325	0.1615	0.97	0.3508	3.3545	0.6691	2.3421	0.7053	1.2332	0.2081	-0.6037	0.2696	-0.2326	-0.754	-0.829	-0.3368	-1.0973	0.7611	2.3116
TP53BP1	-0.1018	-0.3601	-2.0686	-0.5803	-0.7362	0.4687	-1.0886	-0.4051	-0.7501	-0.4507	-0.91	0.3789	-0.9904	-2.4373	-1.0436	-0.5151	-0.162	0.669	-2.0119	-0.8773	-0.1269	-1.3851	-0.0461	0.9475	0.1735	-0.589	-0.3657	-0.8487	0.5666	-1.0372	-0.8084	-0.516	-1.7873	-0.5854	-1.4382	1.5432	-0.7763	-0.1079	-2.6825	-0.8136	-0.01325	-0.3898	0.3177	0.2959	0.7158	-0.5355	-0.9614	-0.04303	-0.7795
FRS2	-0.3339	-1.0584	0.1095	0.554	0.3057	0.2357	1.4502	0.5596	0.3173	0.6688	0.3198	-0.7463	0.6088	-0.8053	0.3719	3.4464	0.3128	0.04571	-0.06528	1.0694	0.288	1.6973	0.112	0.3971	-0.6077	0.06221	-0.3807	-0.145	3.1489	0.7416	1.0562	-0.2372	-0.6229	0.1328	-0.02298	-0.7629	-0.638	0.8664	0.1556	-0.7054	-1.7477	-0.07697	-0.6901	-0.8956	0.589	0.1059	-0.3837	0.5074	0.08996
IARS2	0.004712	0.1143	-0.2979	-0.1931	-0.7294	0.7288	-1.2472	0.348	-0.3941	-0.1409	-0.7696	0.9679	-0.3106	-2.4354	0.237	-1.3711	-0.7462	-0.3902	-1.163	-3.023	0.4474	-1.228	-0.1067	-0.1494	-3.2801	0.09371	-1.3339	-0.6672	-3.2046	-1.1553	-1.6477	-0.9336	0.09873	0.7558	0.3391	-1.0091	-0.5987	0.1477	-0.6857	0.08773	-0.8507	-1.0798	0.0422	-0.3623	0.2426	1.3322	-0.1672	0.1458	-0.158
BECN1	0.721	-0.3027	0.516	1.7801	-0.4782	-0.7182	0.2849	0.4944	-0.289	-0.1319	-1.2418	1.4998	0.007411	0.04404	-0.3494	-2.9617	-0.04634	1.7402	0.843	-0.199	0.7404	0.99	-0.7099	0.2253	0.7965	0.0399	0.06748	0.2159	0.4887	0.09074	-0.6188	-0.02965	0.03932	0.5591	-2.0231	-3.773	0.7453	-0.232	-1.2405	-0.3608	0.5041	-0.1281	1.0519	1.1704	-0.2499	-1.5581	2.5146	-0.003678	-1.1351
GATA2	0.3414	0.5282	0.1213	-0.1154	0.3971	0.304	3.6415	4.8064	-0.2676	1.2045	0.01105	8.6637	0.7936	2.588	4.44	1.0266	0.7235	0.7594	0.3436	0.1847	-0.5126	1.0228	0.2267	0.5873	0.6889	0.579	1.6985	3.1442	2.1031	0.6447	0.7904	0.3538	1.0664	-0.457	1.7073	3.1095	0.7135	1.1691	3.8712	0.6682	0.8072	0.1408	0.8878	-0.7235	0.4931	-0.2911	1.0073	1.1686	-1.0836
KDELR2	-1.5387	0.3602	0.5728	0.1433	0.9832	0.9534	0.6047	0.6148	1.1686	0.5026	0.3961	-0.6352	0.44	-0.9669	-0.2278	-3.0484	0.6485	-0.9793	-1.5078	-1.2735	0.5329	-0.9338	-0.6607	0.003179	-2.4923	0.3226	-0.3776	0.4138	-0.5347	-2.8722	0.1257	-0.07737	0.9836	-0.3482	-1.5556	-1.3945	-0.2364	0.6708	0.6091	0.8454	0.9059	-0.02057	-0.4756	-3.288	-0.2405	0.719	-2.9226	-0.2453	-0.9727
RALGDS	-0.2484	2.364	-0.9561	-0.8906	0.4533	0.4912	0.1168	0.07416	-0.2532	0.1506	-0.0725	-0.1293	-0.6207	3.296	-0.2533	0.2879	0.4741	2.3701	-0.2609	1.011	-0.8944	-0.4983	-0.1982	-0.2999	0.5062	-0.4083	0.001003	-0.2477	-0.141	-0.5129	0.6296	1.3371	0.1789	-0.6731	0.2653	2.569	0.7663	0.395	-0.03646	-0.459	-0.9331	-0.8607	2.0299	2.3242	-1.541	1.2439	0.4632	0.4113	-0.7892
ELAVL1	-1.6005	-0.3722	-0.609	0.8654	-0.7325	-0.2508	0.2264	0.4434	0.6808	-1.3471	-1.2358	-1.7151	-0.1585	-0.9975	-1.4074	0.6108	0.9036	-1.6041	-1.7092	0.5091	4.9261	-0.3977	-0.2348	-0.07287	-1.7966	-0.3877	-0.09271	-0.7068	-1.5553	-1.2311	1.338	0.3625	-0.6998	-0.9401	2.8878	0.1216	0.1747	0.4652	-2.1055	-0.9904	-0.46	-0.2976	0.1344	-1.3001	0.2385	-0.3524	-0.5524	-0.53	-0.5712
NRIP1	-1.4501	0.1977	-0.9094	-0.02245	-0.7072	0.9639	-0.4176	-0.1822	-0.2806	-0.6241	-1.433	0.4812	-0.198	-1.7824	0.6451	-4.5131	0.2264	0.01744	3.476	-1.4836	-5.1487	1.2349	0.5701	0.01471	3.5534	1.0265	0.2993	-0.2373	-0.8425	0.9964	-2.253	-0.6948	-0.0116	0.8802	-4.9733	-0.1993	-0.8273	0.4249	-1.7062	-0.1875	0.06435	-0.9289	-0.4294	4.9891	0.4782	0.0278	0.2451	0.5802	-0.6476
CCNB2	0.804	0.6605	1.0409	-0.2616	-0.0972	-2.8082	-0.3108	0.698	0.1143	0.7012	1.2328	0.8607	1.2028	-4.7414	0.581	-2.7371	1.0849	-3.1448	-6.3194	0.4125	0.4051	-2.7542	0.7885	-0.2734	-1.0072	0.385	-0.6258	0.1935	0.6245	-0.6925	-0.4197	0.6782	0.43	0.5479	-1.5438	-1.6827	0.3738	0.286	0.2924	1.3233	-4.5592	-1.2041	-0.4554	-5.6449	0.009288	-0.1527	-2.006	-0.6194	0.5337
IFNAR1	-0.04351	-1.3967	0.3876	-0.46	0.2354	0.175	1.7269	-0.5277	-0.09325	1.0114	1.0357	-0.2967	0.4924	1.2565	0.9608	3.4067	0.7216	1.4868	0.3131	0.9305	-1.5549	1.1546	0.3445	-0.02371	0.882	0.07607	0.8912	1.1806	0.5821	1.8904	1.2169	0.06104	0.7889	-0.3417	-0.4001	0.752	-0.1102	-0.2077	1.8572	-0.2354	-0.8009	0.745	-0.453	-0.09761	-0.5655	-0.6688	0.5611	-0.5562	0.164
MIF	0	0	-0.8457	0	0	0	0	0	-0.5293	-0.5824	0	0	0	-0.6415	0	-3.399	-0.3471	-0.3169	-0.7043	-0.4242	-2.4258	0	0	-0.5348	0	0	0	0	0.2032	0	0	0	-0.041	0	-1.8276	0	0	0.4754	0	-0.2989	0	-0.7903	-0.7561	-1.3997	-0.3285	0.5521	-1.6738	0.6321	0
RNPS1	0.7036	0.7926	4.284	-0.3271	-1.178	0.04026	0.0666	0.3747	-0.07604	0	0.8101	0	-0.01224	-0.8437	-0.3397	-3.716	1.0168	0.2553	-1.625	0.2108	4.6951	-1.0982	1.0865	-0.564	2.1727	0.6238	-0.6435	-1.2894	-0.2242	-0.5737	-0.4906	0.1197	0.9573	1.378	2.8306	-0.2537	-0.8625	0.01441	-1.0012	-0.08616	-0.4239	-0.4886	-0.6716	-1.9723	0.2591	0.06741	-2.1419	0.3228	-0.9617
DAG1	-0.4657	0.5863	-0.2039	1.0561	0.0985	0.718	-0.07785	0.3995	0.3862	0.234	-0.2753	0.617	-0.206	-2.2362	-1.3491	-2.5248	-1.1381	-2.1923	-0.901	1.101	0.2146	-1.8956	-0.8748	0.8108	-1.9664	-0.7384	-0.06217	-0.6689	0.1504	-2.0756	0.1569	0.5827	0.5631	-0.07406	0.4624	0.08333	0.5098	0.7018	-0.962	0.3376	0.2186	-0.2916	-0.5303	-2.7958	0.9434	1.0711	-3.9358	0.04342	0.5199
SATB1	0.3414	0.7549	-0.1355	0.8466	-0.5907	-0.4536	1.6065	0.2169	0.07759	0.5154	0.3958	0.0677	0.8638	0.2592	0.1064	0.1168	-0.34	-0.9374	1.0496	0.3287	0.5352	1.3559	-0.0435	0.5325	-0.02405	0.9272	-0.1068	0.8822	0.03205	-0.1161	-0.2618	1.0493	-0.946	-0.2686	0.05061	-0.8727	0.2731	0.9642	0.8872	-0.4563	0.2815	-1.0328	-0.04467	-0.1088	0.9659	0.3901	1.2838	1.5464	0.8902
ARID4B	-0.1881	-0.5072	-0.6647	0.6754	-0.8443	0.3381	-0.81	0.849	0.09015	1.2296	0.05885	1.6386	0.5385	0.3964	1.0957	-1.0238	0.3236	1.1265	-0.03272	-0.4154	4.2951	-0.9318	0.3983	0.6474	-0.004796	0.9195	-0.6018	-0.639	0.5221	-1.0262	-0.5256	0.1672	0.3945	0.3207	-0.4248	1.083	-0.08089	0.3719	-0.6912	-0.8369	0.315	0.4122	0.2211	-0.1478	0.8868	-0.1133	0.425	-0.5383	-1.0184
IGF2BP2	1.9241	-0.04235	0.2115	-0.212	0.4735	-0.6352	-0.08815	-0.8435	-0.4274	-1.4668	-0.9837	-1.5265	-1.1962	-0.6268	-1.7578	-0.2943	0.2155	1.1112	-0.473	-0.9957	-1.1228	1.1911	-0.1122	-0.4698	-0.08156	-1.1199	0.1894	-0.957	-1.3134	-0.2929	1.1135	-0.362	-0.6287	0.123	0.7856	1.0929	-0.4019	-0.6488	-1.3568	0.02987	-0.8216	0.1137	0.6112	0.7563	-0.6406	0.6144	1.6488	-0.02334	-0.7584
GSTZ1	-0.2676	0.1229	-0.06385	0.2683	-0.07845	-0.8252	-1.1371	-0.7326	0.6216	-0.4281	1.5459	0.2739	-0.6147	3.3319	2.7541	1.3795	0.1641	-0.02189	-0.3473	0.5768	2.754	1.4967	-0.4226	-0.2415	0.5967	-0.06533	-1.0547	-0.0509	2.8444	-0.4427	-1.6959	2.2265	0.08099	-0.5268	1.1467	-1.5907	0.253	0.1847	-0.03736	0.07563	-0.0453	-0.1989	0.4769	2.1025	0.1693	-0.7555	-2.1947	-0.3383	0.3909
IGF2R	0.7869	-0.1884	-0.3663	-0.4563	-1.1717	-0.781	0.5055	-0.5359	-0.4979	-0.0027	-0.6212	0.3696	-1.348	0.9791	-1.5125	0.2595	-0.5629	0.4162	2.316	0.09931	0.2894	1.2638	0.1672	0.851	-0.4477	-0.8572	0.8584	-0.6398	-0.8323	0.3617	-1.7601	-0.4577	-0.3805	-0.5712	-0.5724	-2.9067	-0.8661	-0.1981	-0.6247	-0.1704	-0.4695	0.2327	0.6876	-1.5941	0.02249	0.3259	-0.6419	-0.4448	-0.4713
SESN1	2.88	-1.0907	-0.2432	1.2339	3.8609	1.9415	3.5747	-0.2623	1.4477	1.6461	-0.781	-0.6748	-1.093	1.3006	-1.8774	2.2584	-0.07293	-0.3311	4.3397	0.4218	-0.06395	-1.6769	0.5122	0.4376	0.6777	0.02492	-0.4434	1.5423	1.5979	0.3215	-1.6178	-0.5859	2.9077	-0.6176	1.9464	0.5234	3.91	-0.5292	1.6095	-0.452	0.1377	-0.7126	-0.2361	1.9165	2.5544	3.1485	-0.6214	-0.01699	-1.2897
TIPARP	0.148	-0.2544	-0.696	0.1485	-0.6722	-0.6347	0.4466	-0.6284	-0.2265	0.0195	-1.3722	-0.7401	-0.4699	0.4247	1.5117	-2.7952	-1.1171	1.4577	1.7968	-0.83	-0.1927	2.1651	0.5534	-1.2311	2.8046	-0.0878	1.3442	-1.0507	-0.7484	2.6567	-0.5556	-0.7922	-0.3233	0.09902	-0.8826	1.0883	0.1628	-0.3812	-0.8467	-0.9956	0.4816	0.01451	0.3061	3.0173	-0.1371	-1.0792	1.8064	0.3662	-1.3166
CRTAP	0.5612	0.4175	0.588	0.8318	-0.584	0.7014	0.6907	-1.5369	-0.2534	-0.0206	-1.3761	0.428	-0.6842	-0.4528	-0.9343	-4.1902	-0.1355	-0.3247	-2.1227	-1.1219	0.6804	-0.9166	-0.03225	-0.007776	-1.9841	0.4476	0.01131	-1.4222	1.0132	0.2052	-0.708	-0.4634	-0.03169	-0.1093	0.656	-2.4213	0.532	0.08184	-0.9774	-0.2931	0.3072	-0.2512	-0.227	-1.8169	-0.6245	0.534	-0.8242	0.3315	-0.3212
SPEN	0.3692	-0.6029	-0.3878	-0.06185	0.5503	-0.3555	-0.2023	1.6974	0.2869	-0.3345	0.2403	-0.3828	1.3263	-0.1539	-1.3447	1.7378	0.3926	-0.9905	-1.2291	0.49	-1.8055	0.6137	0.7526	0.8486	-1.1733	-0.08902	0.7662	0.7913	-0.5303	-0.7974	-0.6008	0.1072	0.2418	0.7385	0.3707	0.3327	-0.09148	0.03802	0.03573	-0.005386	0.9358	-0.5249	0.1224	-2.9576	0.7676	0.06134	1.0001	-0.1827	-0.6702
GMNN	-0.3021	0.7204	-0.05194	-0.4772	-0.0517	0.3709	-0.3189	0.4076	0.8792	0.4488	0.4672	-0.3921	0.4791	0.5882	0.5066	-2.5143	0.5883	-0.6759	-1.7545	-0.9809	0.6431	-1.2428	0.2109	0.4154	-1.8925	0.9419	0.2217	0.03298	0.5283	-0.6219	-1.9459	0.689	0.2013	0.1498	-1.5747	-1.1758	-0.06298	0.4734	0.9155	1.6269	1.9886	-0.6182	-0.3554	-3.2786	-0.5005	-0.6214	-3.3766	0.3088	0.1171
PFKL	0.5037	0.5538	0.5191	0.4406	0.302	0.6591	0.2437	0.2881	0.2977	5.1141	-0.3106	-0.8063	-0.2012	0.1841	-0.8785	1.681	0.3632	-0.7087	2.8284	1.3512	1.3063	-0.4703	0.6847	0.2872	-0.01674	1.0041	-0.044	0.8527	0.7562	-1.64	-0.21	3.3423	1.2712	0.2486	0.2148	-1.3164	0.00259	0.965	-0.1118	-0.01315	-0.8266	-0.4256	0.37	0.2672	0.3921	1.7467	-0.278	2.8456	0.7897
CYTH1	0.1213	0.9356	0.5212	-0.05115	1.1219	1.1578	0.5746	0.2352	1.4213	0.046	0.5838	0.105	0.4501	-0.6365	1.0293	-3.3	-1.3343	-1.0776	0.5079	0.5033	0.9086	-2.2915	-0.2875	-0.9545	-2.7672	0.1239	-0.3109	0.667	0.4349	-1.0165	0.3803	0.02577	0.3033	-0.01417	0.9556	-1.565	0.5988	1.2357	1.7974	0.3499	0.2141	-0.2332	0.112	-1.1468	-0.06595	0.1028	-4.0156	0.467	-0.08859
PDHX	-1.3368	-0.3437	-0.06936	-0.2579	-2.6251	-1.0698	-0.1069	-0.4899	-1.9865	0.5869	-0.2098	0.4629	-1.9658	-0.65	-1.0498	-0.633	-0.6356	0.1536	-2.1417	-1.4967	-1.1069	-0.7355	0.1169	-0.394	-0.7725	-0.28	0.1206	-4.2131	-2.2095	-1.3234	1.009	-0.3273	-0.2207	-0.5818	-1.0236	1.0692	-4.9939	-2.6486	-2.8336	-0.3092	1.3904	0.6412	0.1296	-3.2662	0.01755	-0.7006	0.621	-0.3148	-0.6086
DENND2D	-0.1346	0.1381	-0.1758	0.2497	0.3404	-0.905	-0.3468	1.5462	1.3088	0.543	-0.0738	-0.4599	-0.993	3.1054	0.3224	3.8232	-1.6652	2.7224	-0.3424	-0.4639	-0.5343	-1.6826	-0.3974	1.1664	0.1276	0.3019	-0.05036	-0.785	1.1968	-0.5769	-0.358	0.001632	0.6903	0.4211	1.5015	-1.6467	-0.4886	-0.2044	-0.6397	2.2716	1.6375	0.5871	-0.4118	-2.3605	-0.3995	0.07677	-1.8809	0.3407	2.2083
PRCP	-2.3527	0.2516	0.4457	0.6028	0.4465	0.439	-0.6183	0.3646	0.06569	0.0807	0.0177	0.86	-0.6047	-0.9096	-0.4035	-1.2783	-0.8331	-3.8173	-3.8027	-0.06337	0.7808	-1.6734	-0.5621	-0.3888	-1.5673	0.151	-0.1414	0.4434	1.7542	-0.9802	1.1609	1.004	-0.9601	-0.354	-1.5728	0.4566	0.7946	0.5467	0.628	0.2629	1.0726	0.3855	0.209	-3.7338	-0.2692	0.5048	-3.6695	-0.08236	-1.0681
CTTN	-0.1255	-0.2606	-0.2251	0.702	0.4556	0.0695	-0.8005	0.00579	-0.03055	-0.557	1.0061	1.1064	-0.8667	0.09412	0.0765	-0.3903	0.1797	1.0864	1.5603	0.3551	0.0102	-0.7473	0.3603	0.655	-0.7484	-0.3593	0.4202	-0.1111	0.5123	-0.1376	-1.0616	0.5545	-0.4294	0.6391	0.5326	-1.0386	0.2199	0.1595	-0.7352	0.2346	-0.4873	-0.2361	1.1748	-1.1013	0.8559	-0.2612	0.3429	-0.3351	-0.3273
SMARCA4	-0.623	0.2688	0.375	-0.2175	-0.1898	-0.4549	-0.1117	0.05502	-0.3813	0.1238	-1.2486	-1.0267	0.09803	-0.512	-0.6596	-1.9402	0.2168	-0.8033	-1.6904	-0.09974	0.1119	0.2415	-0.02185	-0.09619	0.05347	0.5527	-0.4119	-0.2525	-1.1038	-0.4405	-0.5138	-0.8192	-0.1896	-0.4969	-0.1789	0.1124	-0.1687	-0.04195	-1.0247	-0.2467	0.225	-0.4411	-0.9219	0.8469	-0.2105	0.6864	1.3945	-0.08957	-0.8853
PYGL	-1.1495	0.8564	-0.5856	-1.3405	0.566	0.3433	0.5597	-2.5994	0.8605	0.2017	0.3426	0.2913	0.3813	0.4087	-1.1262	-3.2791	-0.653	-0.6294	-5.4849	0.5185	-0.01665	-1.6537	1.2887	-0.3131	-3.1413	0.6192	-0.3437	-0.5276	-1.3272	-3.2974	-1.2381	0.4777	0.2669	-0.1648	1.8053	-3.7229	0.4618	0.6148	0.5077	0.7409	-0.7524	0.3133	-0.8262	-10	0.8978	0.3456	-1.1632	1.3487	-0.299
UBR7	0.07756	-0.1636	-0.2043	0.4689	0.04125	0.6638	-0.951	2.8129	-0.06283	-0.6531	-0.2541	-0.3495	-0.1972	3.6741	-0.5968	-3.9533	-0.7342	1.2332	-1.3806	-0.5449	4.7952	-0.2014	-0.2148	0.8574	0.6654	0.3411	-1.3129	0.2878	1.617	-1.5401	0.308	-0.3445	0.3191	0.1097	2.9611	-3.6333	-0.4732	0.9982	-0.3567	-0.3477	-0.7921	-0.2465	-0.1936	3.905	-0.6598	-0.269	0.4841	0.1661	0.04434
GRB7	-0.06389	-0.8092	1.7029	0.6461	0.4776	0.9355	0.7879	-0.06306	0.2819	0.7797	-0.04175	-0.1697	0.1937	0.9486	0.0611	1.2045	0.6266	0.4556	0.03391	0.9378	0.7213	0.4384	-0.054	-0.1014	1.0662	-0.02917	0.6971	0.2016	1.4541	1.5214	0.6547	-0.03009	1.199	2.0085	0.02435	0.5053	0.4817	0.1512	0.9524	0.7191	1.0532	0.2492	-0.2626	0.09528	-0.952	0.05141	-0.1436	-0.6549	0.9401
RPA2	-0.4578	-0.2243	-1.5221	-1.5858	-0.9238	-1.5954	-0.6342	-0.114	-0.8783	-0.02965	-0.3604	-1.3881	-0.0508	1.7783	0.8126	-0.4894	0.2456	0.5564	-0.3772	0.1877	-0.8004	-1.8746	-0.2573	0.524	0.9716	0.1328	0.5857	0.3558	1.0842	-0.7979	0.2821	0.4556	1.3238	-5.4199	0.02149	0.7007	0.1552	-0.6914	0.1163	0.6348	1.0071	0.869	0.1509	-1.5744	-0.3912	-1.1225	-1.775	-0.6364	0.967
CD44	-1.0607	-1.1463	-0.6072	-0.3336	-0.7292	-0.5126	-0.2083	0.07006	-2.121	-0.469	-0.517	-0.5478	-3.852	0.3984	1.3435	-1.3563	-1.2621	0.8786	-1.7622	-0.465	0.1926	2.0446	0.4682	0.1189	4.7363	0.1393	1.0897	-0.3103	0.1307	-2.3413	0.03617	-0.9574	-0.04966	-0.1501	0.4187	2.9991	-0.5624	-0.5224	-1.7993	-1.0278	-0.5705	0.6144	0.5138	4.7573	0.2986	-0.2165	-2.3867	-0.07216	-0.9967
ERBB3	0.8527	0.9176	0.5427	1.4444	0.6791	0.1118	-0.288	0.683	0.2755	0.6166	-0.1362	-1.3319	1.4274	0.8498	1.2491	3.6734	-0.2781	0.2222	-0.6948	0.8426	-0.4458	0.3285	0.9262	1.0752	-0.7761	1.1372	-0.9869	0.9137	0.07727	-0.1021	2.8511	0.7387	1.2798	-0.23	-0.084	-1.3775	0.005963	-0.03052	-1.5309	1.208	-0.4955	1.0973	-0.5163	-1.5328	1.2375	-0.3764	-0.2416	0.122	-0.1286
GTF2E2	0.5636	0.7623	0.8278	0.3735	0.4783	0.9563	1.2571	1.2443	0.5455	0.4426	1.0028	2.2231	0.669	0.5453	-0.2495	1.4185	1.4737	-0.6527	1.6066	0.7174	-0.2621	0.7022	0.1443	0.07428	0.1234	1.2098	0.315	1.0394	-0.2975	0.02176	0.2449	0.2137	1.3022	0.805	-1.4729	0.03679	0.4144	0.6729	0.9377	0.9078	1.3053	-0.937	-0.4174	0.6135	0.6972	-0.5332	0.3539	0.9031	0.5776
VAV3	-0.1089	0.2715	-0.1806	-0.1268	0.09535	1.8663	-0.528	1.7383	1.6375	0.07525	4.9517	6.2884	0.221	0.4529	0.3534	2.8187	4.9817	0.03492	3.2552	3.3063	3.1574	-0.1349	4.0595	2.1416	0.07067	0.008779	-0.1024	1.1492	-0.424	0.4054	2.414	0.1695	2.8244	3.045	-0.3484	5.3325	3.1119	1.6669	3.4164	2.5431	5.3857	-0.1359	0.6783	1.8697	2.6513	-0.3266	0.49	-0.2548	1.9024
ABHD6	0.7059	-0.316	-0.8448	-1.4945	0.0674	-0.3387	0.1324	0.4518	1.345	0.6096	0.00655	0.2941	-0.2964	-0.4265	-0.3118	-0.4847	0.403	3.5677	0.5701	-0.2902	-2.4683	1.0876	4.8447	-1.0177	-0.03863	-0.1654	2.8467	-0.4492	0.284	1.943	0.003509	-0.1499	3.6417	3.5491	2.3885	0.4782	3.5844	-0.6426	0.4387	0.02179	-0.2842	3.9198	0.4254	1.6829	2.306	4.8086	1.6992	3.9986	4.0467
ANXA7	1.659	1.3392	-0.4384	0.02435	0.0548	0.3848	-1.6521	-0.006894	0.3966	0.3604	-0.1652	1.2767	0.4925	-2.0689	0.4608	-0.3908	-1.2698	0.5325	1.0307	0.1334	-1.596	-1.6865	0.9809	3.0568	-0.1178	0.06277	0.1254	-0.5846	-0.3667	0.3141	-1.1593	0.05034	-0.6613	-0.7276	-0.1852	0.4901	0.7837	0.009244	-0.01443	0.8927	0.5121	-0.5316	0.1929	0.4861	0.0344	0.4844	-1.7425	-1.0429	-0.125
MAPKAPK2	-1.764	-0.7571	-0.923	0.4381	-0.8854	-1.0261	0.7399	0.1327	0.5295	-0.1078	-0.5239	-0.3546	-0.1566	-1.5206	-0.6884	-3.5095	-1.2683	0.7642	0.5967	2.9272	4.6471	0.6658	0.9217	-0.3401	0.02343	-0.2994	1.6432	-1.0037	-0.4164	0.134	0.7178	-0.5275	0.6467	-0.5489	4.2189	-3.4797	-0.5212	-0.4774	0.1077	-0.2049	-0.8036	0.9706	-0.3061	1.3469	0.2549	0.8291	0.4435	-0.03315	-0.1341
TXNRD1	8.0794	-0.9081	0.7289	-0.3484	0.05355	0.1886	-0.8381	-0.01505	-0.3665	-0.3556	0.1537	0	-0.1536	3.226	-0.2306	-3.5117	-1.1834	2.4316	0.2451	-0.6475	-4.5694	2.1816	1.1345	2.3438	-1.5191	-0.4279	1.0976	-0.6329	-0.6502	2.1819	-2.674	0.02938	-0.1892	0.3064	-2.0528	1.2346	-0.2596	-0.3014	-4.5723	-0.9427	-0.8731	0.498	0.371	-0.275	1.0163	-0.2561	0.5808	0.1687	-0.2828
CAB39	0.5273	0.4333	1.1232	-4.5158	0.4315	-2.3222	-0.2691	0.9034	0.09062	-0.2837	-0.6858	1.5255	1.3843	1.0868	0.2471	4.0393	-3.8172	-6.9431	2.1101	-2.5663	-1.1582	2.5008	0.1067	0.2569	0.9623	-1.8141	1.1946	-2.651	-0.9741	-2.7402	2.4949	0.2259	-0.7161	0.5112	0.2284	2.3988	-0.3026	-2.4315	-0.8741	-3.6394	-0.407	0.449	0.5663	-6.1302	0.1755	-5.352	1.19	-1.8075	-0.7523
FZD1	-0.2985	-1.4007	-0.6078	3.6729	-0.625	2.1001	-0.1918	-0.8207	-0.4913	-0.704	-0.4342	0.3656	-0.6728	-0.001388	-0.1123	0.9324	2.7518	2.9231	0.4466	1.7529	-1.3864	1.0716	-0.6543	-0.1807	1.7721	0.9612	-0.3702	1.6018	0.02952	3.1886	0.8902	0.07416	-0.9711	-0.404	0.3947	0.1323	-0.4557	1.0264	0.04135	1.9172	-0.483	0.3721	-0.8476	2.7132	-1.3756	3.4642	0.2861	0.9782	-0.5586
CRYZ	-2.0167	0.5525	-0.6091	0.03195	0.1106	-0.1582	-1.658	0.7283	-0.1837	0.6119	-0.7776	-0.5884	0.6036	-1.1021	2.1	-3.1806	-0.5471	-1.0967	1.4894	-0.3363	-0.4936	-0.3447	-0.1859	-0.6647	4.4653	0.488	-0.02764	-1.0689	0.1732	2.0582	-0.6046	0.2937	-0.8208	-0.5956	-2.0192	0.07864	0.6425	0.1419	0.6694	0.9489	2.0322	0.3467	0.02847	5.1152	0.5942	-0.6283	2.3764	-0.5588	0.1145
TIAM1	-1.2554	0.3947	-0.5576	-0.2448	0.2712	-0.1612	-0.9243	3.9673	-0.637	-0.391	-0.7423	-1.1345	2.0487	0.8043	0.1695	0.4564	-0.8538	-0.1455	-0.597	-0.09954	-1.3115	-0.8296	-0.5388	-0.3449	-0.01741	-1.0308	0.3448	-1.184	-0.6749	-0.2283	1.3375	-0.09717	-1.4535	-0.8658	1.2016	0.8286	-0.03132	-0.5879	-0.2573	0.5591	0.349	0.4587	0.1963	0.9905	0.3105	0.1992	0.2118	-0.54	-0.5091
DNM1L	0.2905	-0.2341	-0.8407	-0.425	-0.2323	-0.9068	-1.1057	-0.9061	0.2186	-1.1521	-0.6539	0.1027	-0.3075	-2.3741	1.7623	-1.0336	-1.3021	0.475	0.4275	-0.5544	-0.1054	0.0254	0.1629	0.2903	-1.0027	-0.312	0.2183	-0.4471	-2.456	0.9005	-3.4332	-0.4072	-0.2518	-0.7032	1.486	0.1913	0.226	-0.2717	-1.2261	-0.1939	0.0522	-0.3004	-0.3496	-0.6094	-0.3508	0.09746	0.5279	-0.2086	-0.841
GAA	-0.05219	-0.4315	-0.3601	-0.7591	-0.6567	0.7932	-0.7127	-0.5898	-0.7255	-0.3604	-0.8077	-0.8427	-1.0882	-0.6046	-0.06345	-1.7748	-1.2988	-0.9736	-1.177	-0.7988	-0.6435	-0.3775	-1.5649	-0.9193	-1.585	-0.8212	-2.1332	-0.7321	0.9172	-1.8835	-1.1895	0.5916	-0.7741	-0.7031	0.1571	0.9167	-1.063	0.5483	-1.66	-0.6823	-0.2163	-0.5255	-0.1472	-0.7811	-0.6132	0.1909	-1.3151	0.2908	0.7619
DERA	-0.7078	0.03975	0.4335	0.9663	0.0261	0.5209	-0.5166	0.7988	0.2891	-0.2917	1.2179	-10	0.2438	-0.8755	0.2041	-1.1772	0.4074	-0.7945	-1.9229	0.8393	-2.2973	-2.1291	-0.1117	-0.139	-3.3568	-0.1893	-0.8416	-0.4656	-0.05686	-1.8484	0.5347	0.9946	-0.06601	-0.1524	-2.9127	-0.4711	0.8956	-0.6148	0.8071	1.1871	-0.3252	0.1355	0.5201	-1.6669	-3.2132	1.1212	-3.1322	-0.4392	0.6778
SKIV2L	0.5494	0.2732	0.4124	0.9542	0.6382	0.5006	0.01525	0.09601	0.5222	-0.2524	-0.6625	0.9626	0.6558	0.6673	-0.2338	-3.3159	0.00139	-1.1958	-0.1672	0.08232	0.2595	-0.9087	-0.7871	0.5621	0.1034	0.9859	-0.7603	-0.2551	-0.728	-1.2402	0.4771	0.4544	0.3724	-0.1123	0.6467	-3.9761	0.4479	0.6067	-0.8552	-0.226	0.3686	-0.1681	-0.0161	0.08279	0.8621	0.1337	-1.2959	-0.2387	-0.5295
BLMH	-1.0144	0.2977	-0.392	0.112	1.7448	0.0273	-0.2916	-0.104	0.4916	-0.5504	0.5431	1.0515	0.6175	-2.2927	-1.7914	-3.092	0.4913	-2.3769	-2.6694	-0.1495	0.4284	-1.6216	-0.1509	1.8632	1.5673	0.3392	-0.641	0.1548	0.163	-2.2422	-0.6246	-0.07327	0.6105	-0.1901	0.7708	0.3766	1.803	0.593	0.55	-0.1715	0.00455	-0.3849	0.3183	-2.3221	0.8215	0.0473	-2.4908	1.0592	-0.0606
PTPRK	0.4983	-0.3194	0.5782	-0.1543	-2.4031	0.05587	0.6084	0.1838	-0.6242	0.339	0.09275	-2.0983	0.06793	0.4841	0.7768	2.5389	-0.1717	0.5111	-0.04828	-0.1235	-0.2409	0.4066	-3.6099	-1.2521	-2.7451	-0.3055	0.2281	-0.5068	-0.279	1.9003	1.2484	-0.09343	-1.3208	0.2133	-2.3925	-0.1501	-1.6693	-0.7058	0.03708	0.1381	0.2754	0.2647	-1.5453	-2.3695	-1.0084	-0.8464	0.2278	-0.6439	-1.0084
HERC6	-0.6042	-0.0659	-0.3175	-0.8508	-0.5878	-0.1625	0.5986	-0.7716	-0.5193	0.2981	-1.1245	0.964	-1.0836	0.09762	-0.5274	-0.3222	-1.5917	1.4267	0.5344	-0.1915	1.0447	-1.3529	-0.6003	-0.4851	-0.2144	0.9309	-0.1701	-0.5304	1.5565	0.2117	-1.5505	-0.3349	-0.1744	0.2332	0.6355	-0.131	0.08591	-0.05657	-0.8851	-0.2915	0.5213	0.4105	-0.4397	-0.2135	-0.2365	0.2093	-1.4157	1.0165	0.1131
RRP1B	1.4447	0.6573	-0.1679	0.8605	1.3307	0.4328	-0.0711	0.2605	0.2093	-0.399	0.049	0.0784	0.3037	0.4911	0.111	0.7551	0.1074	0.2221	-1.4845	-0.6738	-0.7584	0.3862	0.1959	-0.07602	-0.8208	0.5129	0.694	1.9743	-0.8317	0.6165	1.1451	-0.6014	0.2032	-0.2345	2.0761	2.2562	0.02589	0.1931	0.2435	-0.5408	0.4602	0.2156	2.2837	-1.9584	-0.03975	0.5326	0.9146	-0.6739	-0.1876
MKNK1	-0.4978	0.7787	1.1226	-0.6639	0.3016	-0.01485	1.5607	0.5803	1.1601	1.1223	-0.1401	-0.0506	0.9662	0.6264	-0.3399	3.2951	0.1464	0.4069	1.5561	-0.125	-1.3548	1.081	0.297	1.1687	-0.04201	1.3246	-0.4063	1.2128	1.1669	3.8355	0.03423	0.4029	0.4522	0.1649	0.1645	0.7192	0.416	0.1023	0.406	-0.004024	-0.6482	0.06948	-0.4463	-0.8216	-0.6293	1.7477	0.4354	-0.8473	0.5768
TSPAN3	-0.6111	-0.8328	-0.466	-0.2366	0.06085	0.2422	-0.6752	-0.6507	-0.5911	0.5176	-0.8719	-0.6473	-0.8545	0.9661	-1.0175	-4.7285	-0.3967	-1.4914	-0.2669	-0.6334	0.7069	0.6143	-0.3928	-0.4921	-0.5709	0.08623	-0.2387	-0.5154	0.4347	-1.6253	-1.502	0.04055	0.6361	0.2583	-0.5418	1.2274	-0.2008	0.8815	0.1145	0.1582	-0.05505	-0.7405	-0.4632	0.04444	0.2747	0.133	-2.2199	1.0996	-0.03857
ACOT9	-0.198	1.2497	0.9195	0.5691	0.9375	0.692	-0.7685	0.4691	0.2554	-0.1822	0.701	0.101	0.6122	-0.08306	-0.6572	-3.1801	-0.1331	-0.6443	1.4325	0.9184	-4.7615	0.7533	-0.6801	-0.405	-1.3132	-3.805	-0.4364	0.452	-1.0133	-1.2151	0.2993	0.8736	0.4297	0.05913	-0.9523	-4.6607	0.3956	0.6699	-2.7238	0.7896	0.3037	-0.6731	0.09872	-1.173	0.3884	-0.08089	-0.4985	0.3076	0.2224
PIK3R3	-1.7182	-0.1343	-0.413	-0.8405	-0.2444	0.42	0.9837	-0.1685	0.2114	0.0177	0.3226	0.8901	-2.2933	1.3688	-2.0473	3.4237	-0.8348	-1.638	-2.7657	0.1731	-0.1098	-2.3951	-1.5464	-0.5629	-0.5951	0.2337	-2.6405	-1.806	2.9519	-1.6988	-0.1122	0.0384	0.1213	0.8817	-2.6132	3.9218	-1.309	0.3672	-2.7529	-0.4676	-0.1301	0.2859	-0.2955	-2.8121	-1.8458	-0.7813	0.1974	0.04188	0.7584
KEAP1	1.3275	0.8916	0.8264	1.8748	0.4639	0.8167	0.7185	0.4751	0.4116	0.1525	0.9326	0.7353	1.2226	1.0686	-0.09495	0.9902	0.193	-0.2395	-0.4537	0.3261	-0.2132	-1.0142	-0.6914	1.8629	0.9244	0.9192	-0.6823	0.5606	1.3068	0.00498	1.723	0.2744	-0.1172	-0.2241	-0.3126	2.8579	-0.09667	0.155	-0.4941	-0.01012	0.3389	-0.2213	-0.471	0.3609	-0.1667	0.3101	-2.459	-0.09795	-0.7772
ST3GAL5	-0.8828	0.7598	0.9148	-1.5203	0.3492	0.2543	0.2747	-0.4357	1.836	-0.03025	-0.0804	-2.515	-0.7361	0.03745	0.8274	3.0437	3.5787	-0.2833	-0.5136	-0.1991	5	-1.3128	-0.6228	2.0226	0.9632	-0.5297	-0.4797	-0.6439	-0.1997	0.1371	0.02647	-0.02239	-0.4334	-0.2245	-0.5182	3.8654	-0.03096	0.4931	0.1933	3.4651	1.61	0.2804	-0.3201	1.12	-1.0389	5.6907	5.8325	-1.2272	3.344
CTNNAL1	-0.9636	1.0154	0.5039	1.2501	0.9056	1.23	-0.1536	0.9474	-0.1864	0.1269	1.3087	-0.6906	1.1548	-0.3456	1.1122	-3.6081	0.3761	-2.6737	-0.7206	0.4182	0.9568	-0.7267	-0.0977	-0.0908	2.0846	0.1229	-0.4123	0.4155	-0.1911	0.1915	1.8328	0.3793	0.3978	0.4816	-3.5101	0.2477	0.7937	-0.4851	-2.3997	0.67	0.1269	-1.504	-2.3059	-1.2576	0.4949	-0.2434	-0.8874	-0.1196	-0.2085
TFDP1	-1.6662	-0.2385	-0.2786	-0.8974	-0.3309	0.431	-1.4265	0.2995	-0.207	-0.8064	-0.5586	-0.2499	-0.5063	1.6866	-1.6007	-1.4986	0.5136	0.1776	-0.4748	-0.0582	-0.3334	0.00965	-0.07755	-0.669	-1.1379	-0.06725	-0.9021	-0.7261	-0.1679	-1.498	0.4409	0.3849	-0.5711	0.6029	0.9526	0.2463	-0.519	0.9323	1.141	-0.7617	-1.0251	0.2134	1.4503	-1.2448	0.4291	-0.02037	-1.5332	-0.004093	-0.971
ABHD4	1.0371	-0.2912	-0.3127	1.0484	-0.5724	-0.3422	0.1984	0.9338	0.2919	0.4712	0.4682	-0.0305	-0.5431	0.1246	-1.1622	0.3913	-0.8424	0.5592	-1.717	-0.3775	-0.1654	0.4671	-0.08815	1.7033	0.7725	-1.0844	0.07418	1.4459	-0.7425	-0.5892	0.3601	-0.03499	0.05096	-0.3759	-1.1437	0.9651	-0.3942	0.4061	-0.4392	-0.3231	-1.1747	0.916	0.2043	-0.01811	0.8094	1.2064	0.09904	-0.7164	1.0148
SMC3	-0.5621	0.185	0.2432	0.19	-0.1515	0.7873	-0.3044	-0.6136	-0.0006657	-0.784	-0.02625	0.7423	0.3149	-0.7441	-0.2794	2.9885	0.7014	0.2466	-1.2764	-0.5875	-0.3297	-0.7014	0.4687	0.9349	-1.0973	0.3981	-0.5775	-2.4471	0.3668	0.46	0.7925	0.1638	-1.7187	0.9353	0.821	-0.4454	0.5958	0.2891	0.319	-0.6956	-0.4824	-1.0115	-0.1786	-0.7385	-0.4361	-1.0766	-2.1807	-0.3547	-1.115
INPP4B	0.7724	-0.6201	-0.2512	-0.1887	0.2081	3.3556	-0.4312	-0.05984	0.6674	-0.3848	-1.6024	1.1254	-0.5495	-0.3754	0.8911	-2.6821	1.7563	0.1099	0.4847	-0.4665	3.6916	3.285	0.2129	0.4855	-2.1578	-0.4812	3.7896	1.5754	0.8088	-0.7624	0.348	-1.3867	-0.1939	0.1365	2.0063	1.1899	-0.5028	0.05736	-1.506	-1.0952	-0.0967	0.1434	3.5529	0.5741	1.4587	-0.1784	1.5338	-0.1594	1.6721
LBR	-0.6248	1.0002	0.7914	-0.1348	0.03135	-0.09888	-0.9462	0.7288	0.3664	0.2275	1.4566	0	1.2163	-3.8358	0.76	-2.8952	0.3732	-1.1668	-3.2774	-0.2826	-0.7705	0.3752	0.1885	-0.1795	-1.3346	0.1035	-0.5574	0.0574	0.05163	-1.9773	0.9255	0.5065	0.002424	-0.3919	-2.3785	0.3689	0.4189	-0.1018	0.05302	0.8272	0.7729	0.0439	1.2749	-3.4832	0.1926	0.2207	-1.8193	-1.3321	0.6392
PPIE	0.2194	0.2663	-0.2673	-0.3546	-0.03405	-0.5912	-0.5678	-0.4626	0.5785	0.1858	-0.2273	1.0959	0.3921	-0.7115	0.1988	-0.5015	0.6656	0.346	-1.3172	0.08976	-0.534	-1.8822	-0.4782	0.05741	0.1027	0.4741	-0.07431	-1.1458	0.9005	-0.6516	-0.9812	0.3953	0.5481	0.1537	0.8677	-1.2128	-0.8679	0.3289	-0.2963	-0.3517	0.4257	-0.6217	0.3577	0.1334	-0.6675	-0.4788	0.2844	0.5315	0.2641
ZMIZ1	-0.6422	0.4912	0.3797	0.7646	0.7054	0.8283	0.4464	0.254	0.5598	-0.3454	0.7929	-0.1089	0.5476	-1.133	-0.7691	-0.5808	0.08805	-0.8759	-0.2323	-0.2103	1.014	-0.01875	0.6224	0.08522	-0.5319	-0.2384	-1.152	0.4883	-0.1033	-0.9252	0.1593	-0.002516	-0.1115	-0.007785	-0.6924	0.3153	0.8316	0.3963	0.403	0.2338	-0.2587	-0.4512	-0.4364	0.4162	0.7461	0.7932	-0.9566	-0.09947	-0.1837
PPARG	-0.3354	-0.2483	-0.4772	0.2708	0.3026	-0.5618	4.1985	-0.0343	1.7425	0.353	-1.3031	0.5304	3.1383	3.4121	1.6226	2.0474	-0.4391	0.6856	0.03452	0.3569	4.9787	1.1856	0.04615	1.7428	0.8811	-0.3251	3.2031	-0.3903	0.46	1.7464	-0.242	0.11	0.3296	-0.5317	0.4713	2.8409	0.4388	-0.6876	0.4757	0.8983	1.1472	0.2305	2.5989	-0.3638	0.1824	0.2586	4.0256	5.8143	-0.8364
TERF2IP	0.697	-0.2551	-0.2976	-0.4992	-0.582	-0.4288	1.1763	-1.0072	-0.7236	-0.4412	-1.2949	-0.4235	-0.6244	2.4036	0.402	1.0984	0.3831	2.7366	1.7749	-0.03008	-0.5677	2.6418	0.6364	0.2696	2.31	-0.1176	1.0268	-0.03178	0.5151	1.0275	1.727	-0.8996	0.3207	-0.08866	1.3599	1.2399	-0.6563	-0.7288	-0.6526	-0.5764	-0.1986	0.7894	0.8153	3.8877	-0.1412	-0.306	2.1936	0.6103	-0.5652
BNIP3	-3.6224	-1.1279	-1.0791	-0.906	-1.1754	-1.9143	-1.2582	-1.5579	-0.8053	-0.3065	-1.0415	-0.2644	-1.4135	-1.1731	-0.8834	-3.567	-0.0945	-0.7702	-0.06162	-0.6197	-3.7702	-0.1938	-0.4169	0.02008	0.219	0.6784	0.5334	-0.1495	1.2517	-1.5314	-2.2898	-0.06421	-0.1613	-2.9917	-1.6377	-2.117	0.2721	0.2479	-0.01221	-0.8951	-0.5961	-0.9982	-0.7023	-0.9273	-0.1371	2.8037	0.7493	0.3093	0.9079
RPP38	-0.3259	-0.124	-0.5085	-0.2407	-0.08545	1.7613	-0.7525	-0.519	0.06677	-0.06285	-0.4429	-1.762	-0.9268	-1.3095	0.7527	0.2338	-0.2789	0.4723	0.04723	0.4423	4.9768	-0.0662	0.4266	-0.01059	0.04444	-0.6745	1.171	-0.328	-0.5309	0.81	-0.03472	0.3982	3.1611	2.52	2.3532	0.1504	0.2314	-0.8178	-0.3289	0.271	1.0338	0.7334	0.4592	0.9292	-0.449	0.1279	-0.1927	-0.3268	-0.1821
BCL2	3.7425	0.3378	0.9393	5.0184	-0.5394	2.5208	0.2718	-0.1106	-0.003545	-0.5825	-0.1876	8.5666	0.602	0.092	0.3066	3.148	2.7419	-1.0794	2.1019	1.7871	4.2462	1.1321	-0.8898	0.2273	-0.2446	1.3561	-1.2284	0.6499	3.0813	2.5972	-0.01603	-0.01708	-0.1753	3.888	-0.4503	-0.8707	2.4812	1.5532	2.0657	2.8466	1.1602	-0.1457	2.913	3.2988	3.0826	4.0523	1.3018	0.8508	2.1622
CAST	-5.0275	-1.1312	-0.6191	-5.2665	-0.637	-3.5328	0.2521	0.005173	-0.8934	-0.1131	-0.9338	-10	-0.5032	-0.2459	-0.8809	-2.3641	-5.1772	0.1815	-1.5375	-2.9725	-2.4401	1.0805	-1.3072	0.6404	0.1893	-2.7529	0.6309	-0.413	-3.5902	-2.4398	0.06275	0.2775	-1.333	-3.6906	0.5403	-0.04409	-3.6465	-1.6967	-2.4404	-3.4479	-0.1062	0.7182	-2.1843	-2.4774	-3.0698	-5.5956	-0.3336	-2.0303	-3.5223
BAG3	-1.159	-0.7408	-0.08662	2.8045	-0.3849	0.01958	-0.1805	0.4893	-1.9076	-0.7582	-0.7675	-0.2779	-0.2188	-0.2073	-4.957	-3.564	-0.9935	1.7607	-0.9263	0.03368	-4.2811	2.6855	-0.4937	1.9285	-0.01042	-0.7702	0.9205	-0.5131	-1.0713	-0.5148	1.6879	-0.3053	-0.2551	0.6544	-2.8983	2.561	-3.6652	-0.8516	-1.6978	-0.674	0.3081	0.924	0.4687	0.7398	-3.2107	0.01055	-0.1095	-0.387	0.06156
RBM6	-1.6498	0.0283	-1.1446	0.4611	-0.0356	-0.5285	-0.3133	-0.333	-1.0199	-0.1465	-2.251	-0.2621	-1.1982	-2.5986	-1.4962	1.8138	-1.132	-0.02725	-1.2737	-1.2657	0.1712	-2.1416	0.8637	0.3113	-0.6562	-0.507	-0.6774	-1.4375	-0.2036	-1.8358	-1.9183	-0.1989	-1.4982	-0.6799	2.1913	-0.9422	2.5922	-0.02903	-1.3742	-0.2174	-0.5095	0.1086	0.113	-0.6596	4.0351	0.0001394	-1.6447	-0.2873	-0.3592
CSK	-0.905	-0.8415	-0.5618	-1.1883	0.9923	-1.0283	-0.5214	0.116	-0.256	0.1363	-0.8013	-0.6343	-0.04639	0.2034	0.9074	-0.3058	-0.2617	1.0599	0.6851	0.009504	0.1366	0.7132	0.4162	-1.0338	0.5961	-0.341	0.2008	-1.0684	-0.9791	0.1609	-1.1578	-0.7388	1.2379	-0.611	1.2066	0.8169	0.05858	-0.2551	-1.4137	-0.02461	-0.0039	0.4519	-0.168	0.4304	0.3306	0.3022	1.9295	-0.3444	-0.5384
GNA11	0.9115	0.5387	0.6096	0.8821	-0.6985	0.5724	-0.1538	0.1135	0.07651	-0.2516	0.9792	0.6677	-0.3258	0.2849	-0.8738	-1.2363	0.6599	-0.7648	0.3843	0.06848	1.9266	0.4735	0.1766	0.3473	-0.2897	-0.1818	0.1282	0.3273	0.5957	0.45	0.4388	0.2845	-0.6501	0.6827	-0.425	-0.2629	-0.5741	-0.2707	0.02173	-0.4916	-0.3065	-0.04517	0.1192	-1.3841	-0.5074	-0.1444	-0.6964	-0.1558	-0.8745
ALDOC	-1.7639	-1.1065	-0.8347	-0.05515	0.07885	-0.8424	-0.5289	-0.7761	0.3878	-1.4138	-0.1647	-1.2112	-1.1794	-0.1716	-0.7255	2.1591	-0.2188	-1.2669	-0.7746	-0.2146	-1.5385	-1.263	-1.2484	-0.3065	-0.4273	-0.3059	-0.2936	-0.4034	-0.4125	-1.5834	-0.9223	-0.1662	-0.7678	-0.7128	-1.4089	-2.0369	-0.01276	0.2961	-0.03923	-0.3461	0.00605	-0.4539	-0.4691	-0.5507	0.9792	3.4477	-0.6689	-1.8721	-0.8632
TOR1A	2.2928	-0.7398	-0.6569	-0.3054	0.1048	-0.1404	-0.6867	0.166	-0.08971	0.3878	0.411	-0.284	0.01164	1.037	-0.8752	1.8423	-0.08369	0.5008	-0.3092	-0.3673	-0.4229	-2.5082	-1.656	-0.6563	0.8172	-0.7651	-0.6377	-0.5973	0.3295	-1.0605	-0.7476	-0.8541	0.6233	-0.4221	0.3172	-2.4321	0.2376	0.3813	-0.1784	-0.1377	-0.06645	-0.1536	-0.4808	2.3945	-0.632	-0.8547	0.5977	0.2297	-0.5877
SLC25A13	0.7186	0.8359	1.2783	1.8269	-0.1707	-0.09278	1.4489	0.6555	0.2812	1.1288	1.4669	1.6832	1.4603	1.4369	1.4967	1.2104	-0.01167	0.5106	1.2519	0.8279	1.5302	-0.2136	1.0881	-0.152	1.4641	1.1509	1.4362	1.1466	1.2152	1.1157	1.14	0.4801	1.0912	0.6865	0.711	0.6298	1.6433	0.06557	1.9102	0.5064	2.7281	0.4821	0.2677	-0.1091	0.197	0.2122	-0.685	0.3896	1.0656
UBE2L6	-0.6458	-0.0939	0.01043	-0.7459	0.0144	-0.03916	0.4576	-0.6864	-0.4912	0.2252	-0.9552	0.8915	-1.0036	0.02183	-0.6729	0.1969	-0.9035	1.8383	0.1871	-0.229	1.0307	-0.9887	0.1654	-0.3346	-0.3788	1.5171	-0.06973	0.394	1.9078	0.02994	-0.9908	-0.1465	0.1887	0.2083	0.9367	-0.3358	-0.02649	0.09431	-0.3199	-0.2143	0.2906	0.6181	0.2261	0.3608	-0.3697	0.04367	-1.4073	1.1146	0.4305
SYK	0.2397	-1.0786	-0.4556	-0.3119	0.1109	-0.5109	0.08875	-1.495	0.3043	0.4162	0.61	0.9433	-1.08	1.0718	0.1278	4.2437	0.808	0.951	0.4021	0.2026	4.5099	0.7271	0.5766	-0.8545	1.2081	-0.6344	0.2194	-0.4397	0.0548	1.7139	0.02688	0.9575	-0.5382	-0.02978	1.3042	0.2681	-1.106	-0.6533	-0.07526	-0.05795	-0.02855	0.9628	-0.1071	0.2744	-0.8731	1.0364	0.8902	-0.4105	-0.4227
TSPAN4	0.3728	0.594	1.3064	0.7938	0.8292	0.4706	0.6675	0.6108	0.1481	-0.06605	-4.5053	1.057	0.06205	2.3464	0.659	-2.7432	0.07493	-2.6083	1.7363	0.3837	-5.2161	1.0383	-0.6791	-0.1707	0.5672	1.3333	0.5811	0.264	0.823	0.9226	0.5829	-0.3735	0.2472	1.1348	0.7537	0.1719	0.05541	0.01047	-1.1179	0.01155	0.0632	0.02671	-2.7438	-0.9553	-4.0969	-0.4011	-0.4498	0.5463	-0.622
NR3C1	-1.4468	4.9454	-0.03281	-0.5825	-0.4964	0.1667	-1.1184	-0.3631	0.2562	-1.0692	-0.2104	0.976	-1.1973	2.7932	-0.7519	1.6958	-0.6471	-0.0505	0.0471	2.6702	5.3212	4.5237	0.1215	0.272	-1.7111	0.1749	2.9199	-1.1683	0.9259	-1.5543	0.6205	-0.1352	-1.3415	-1.4478	-0.4212	0.2173	-0.07134	-0.6863	-0.2773	-0.5731	-1.3248	0.2392	0.13	-0.5908	-0.5781	0.2632	-0.7017	-0.3406	-0.5758
PCBD1	1.0648	0.7763	-0.1007	2.0039	0.2552	-0.03247	0.5479	0.266	0.3325	-1.0512	-0.0688	-0.9011	0.8883	-1.7312	-0.3772	-3.5801	0.8432	0.4257	-2.5273	0.8862	-0.0135	0.8901	1.3553	0.1509	-1.7583	0.173	-0.1545	-0.5293	-0.7277	0.2159	-1.3756	0.2307	-0.3605	1.3393	-0.3888	-0.9801	0.1088	0.3392	-1.2195	0.2831	0.1828	-1.0924	-1.0461	-6.8363	0.7258	-0.08011	-1.4763	0.0224	-0.9543
ICMT	0.147	0.3587	-0.2001	0.3601	-0.3808	0.6642	-0.351	0.595	-0.4868	0.3908	-0.7646	-0.171	0.03701	1.3421	-0.0987	-2.6665	0.2278	-0.9865	-0.576	-0.6523	-0.361	0.2603	-0.05205	-0.3298	0.9738	-0.7653	0.2221	-0.7787	-0.2276	0.1659	0.4466	0.5051	-0.652	-0.02423	1.0724	0.1594	-0.231	-0.2055	-1.0064	0.3368	-0.2296	0.2341	0.5651	0.5446	-0.3823	-0.6809	0.607	-1.3233	-1.8233
TRIB3	3.1168	-0.9054	-0.4876	-0.4633	0.1236	-0.7658	0.8662	-0.5448	0.3128	-0.07335	0.6137	-0.8311	-0.2095	0.6408	-0.045	0.7528	0.3239	1.048	0.3457	0.296	-0.2694	0.7542	0.9238	-0.212	1.2503	0.1172	0.1582	0.671	-0.01608	1.2158	0.485	0.03963	0.5019	-0.5111	-0.4153	0.4149	0.1283	-0.287	0.6147	-0.2945	-0.5785	0.09087	-0.7958	0.9446	-0.3227	0.3495	0.7913	-0.1709	0.8316
EIF4EBP1	7.6201	-0.5078	-0.1434	-1.0181	0.5562	-1.0774	-0.1061	0.5784	0.06777	-0.6493	-0.4457	0	0.2895	1.2037	-0.9553	-3.7285	0.5155	-2.1044	-2.1047	-0.8236	0.5888	0.8173	1.2037	-1.414	-1.3007	0.601	-0.9846	-0.01606	-1.9541	-1.5567	-1.1858	0.2271	0.1122	-0.1984	-2.2614	-1.0492	0.4434	0.5961	-0.4209	-0.2624	-0.489	-1.0335	-0.1293	-2.2557	1.0779	0.9011	-0.165	0.7915	-0.1758
PHF15	-0.5305	-0.242	-0.2974	0.3273	-0.2632	-0.863	0.0821	2.6234	-0.5926	-0.9704	-0.5822	0.3202	0.003995	-0.9029	-0.7916	-0.2187	-1.0589	2.178	-0.04896	-0.7896	1.604	4.7561	-0.6926	0.7186	0.08579	1.7378	-1.1349	-0.3043	1.3757	0.4352	2.0322	-0.8961	-0.2287	-0.331	1.3444	-0.7801	-0.05602	-0.313	4.8132	-0.741	-0.1299	-0.1137	0.2065	0.4711	0.0631	-1.0681	-0.3537	1.181	-0.8784
CXCR4	1.0431	-0.1269	0.5955	0.4967	0.2851	0.16	0.2467	2.0577	2.1479	0.3711	5.5538	-1.2136	2.6198	0.3051	3.2639	3.8096	0.5476	3.8226	0.009188	0.824	4.3714	0.3456	0.1696	0.1469	5.2082	-0.367	-0.08986	0.5914	0.4163	1.6891	0.839	0.1598	4.4785	-1.2562	1.9789	0.08825	-0.7517	0.8897	0.7622	-0.4055	-0.6617	0.0002447	-0.3917	10	-0.4555	-0.2276	0.9336	4.5818	-0.3971
GNPDA1	0.1817	-0.3492	0.3712	0.9253	0.2013	0.3178	-0.4776	-0.08813	-0.439	-0.0265	1.1331	-0.4025	-0.2653	1.3676	1.1472	0.2506	0.3876	0.04229	0.2515	-0.123	-0.7864	3.8967	1.0756	0.04049	1.7733	-0.003772	0.8319	0.5866	-0.2448	1.1076	0.9114	-0.3473	1.2546	0.4224	-2.7813	3.5734	0.3225	-0.5818	-0.193	0.5036	-0.5595	0.3202	1.8794	4.4762	-4.622	-0.9763	5.4472	-0.8738	-0.4599
CCND3	-0.9039	-0.1639	-1.0444	-2.008	-1.0861	-0.5562	0.2884	-0.8621	-1.325	-0.1797	-0.468	0.4459	-0.927	2.7605	-0.9376	-0.6883	-1.0231	1.1999	1.2701	-0.5475	0.5168	0.9052	-0.4848	0.5093	1.4781	0.6097	0.02246	-0.5581	0.3049	1.3449	0.04599	-0.3183	-0.08702	-1.7806	-0.6963	-0.1626	-0.08043	-0.6916	-1.3349	-0.4674	-0.2948	0.7135	-0.3035	-0.3998	-0.5579	-0.5659	0.3562	-0.3737	-0.2929
FKBP14	-1.5915	0.7522	0.5743	0.7517	2.0375	-0.1313	-0.6856	0.4945	1.5412	-0.1966	-1.3326	1.2345	1.4642	0.01273	1.4436	-2.6082	0.4437	-0.915	-0.9724	-0.5912	1.3309	-0.6068	-1.9378	-0.1364	-3.3816	-0.4238	1.0644	-0.8725	-1.5238	-2.0088	-0.2617	0.4817	-0.4462	-0.3812	0.1902	-0.6318	0.08654	0.385	1.5352	-0.4582	2.7788	0.3126	0.8113	0.1376	-0.01854	-0.1775	-0.3752	0.4861	0.9743
CIAPIN1	-0.1698	-0.3704	-0.8136	-0.704	-0.6307	0.389	0.0941	-0.02102	-0.04997	-0.342	-0.8094	-0.8779	-0.04244	0.09174	-0.3941	0.7665	0.1654	0.1697	-0.122	-0.5414	0.2316	-0.3716	-0.4733	0.1825	0.2045	-0.01117	-0.3782	-0.8602	-0.3005	0.02971	0.8769	0.05795	-0.8757	0.1334	0.06676	0.6921	0.9641	-0.5873	-0.5155	-0.0549	-0.4646	0.6604	0.2783	-0.03623	-0.3456	-0.4684	0.6654	-0.6342	-0.007918
NUCB2	-0.2845	-0.613	-0.148	-0.00755	0.5038	-1.0949	-0.5486	-0.1929	-0.5759	0.2182	-0.03325	0.445	-1.03	-0.4496	0.6197	0.08337	-0.8509	0.3422	2.6962	0.4137	1.564	-0.7006	0.2716	-0.265	-0.4549	-0.3329	0.496	0.2433	0.8227	0.1898	-1.1689	0.2595	0.0768	-1.2669	0.4173	-0.2137	-0.5399	-0.2195	-0.01663	0.1574	0.362	-0.09749	0.386	0.4135	-0.2035	0.5615	0.7026	-0.6666	3.1902
COG7	0.3852	0.05305	4.1628	-0.9268	-0.0071	0.02584	-0.5346	1.1736	-0.06049	0.4776	-0.1638	-1.088	0.117	-1.4839	-0.7127	2.316	0.9807	2.9017	-0.6123	0.5245	4.5108	3.7353	0.4818	0.4269	0.9117	-0.2112	-0.8994	-1.3447	0.8435	-0.7339	-0.1934	-0.0313	0.58	0.4145	0.4704	-0.9445	-0.2451	1.0705	-0.2454	0.1665	-1.6271	-1.0201	-0.5842	2.03	1.2422	-0.2995	-0.9817	-0.8704	0.3802
RSU1	0.9544	1.2012	1.3774	0.8497	0.6744	1.381	1.2873	0.7765	1.3711	0.5466	0.753	0.3695	0.9913	0.4286	-0.339	1.3165	0.559	-0.6816	-0.542	1.2856	0.1492	-2.7523	0.1436	-0.1853	-1.4669	0.5601	0.2856	0.98	-0.5772	-0.2453	0.4545	0.3255	0.4195	0.7643	0.4393	-0.3198	0.2019	0.9069	0.9009	0.7208	0.1774	-0.0443	-0.07281	-2.1998	0.4357	0.2582	-0.792	0.4746	0.1716
PTPN6	0.1177	0.1622	0.6559	-0.1625	-0.1846	0.3879	-0.1298	0.4278	-0.1164	0.7767	0.4719	1.0206	0.1133	0.5441	3.0079	3.2971	0.5716	1.463	-0.3928	0.2541	1.8338	1.0822	0.4698	0.2966	0.9686	-0.01295	0.4149	0.9323	2.3538	1.7823	0.7388	0.3053	0.2861	0.2673	1.0029	-0.4539	0.2125	-0.1815	-0.05844	-0.3251	1.718	0.7151	0.5698	0.1029	0.3648	1.2949	1.1625	-1.2755	0.7133
TUBB6	-0.6163	-0.2998	-0.7271	-0.9201	-0.5102	-4.0837	-0.4896	0.2826	-0.5428	-0.2998	-0.1286	-0.6698	-0.3857	0.2969	-0.9078	-5.6349	-0.8516	2.1655	1.2848	0.3547	-5.5103	-3.8588	0.6745	-1.0466	-1.0983	-3.7345	1.4471	-0.7358	-0.9474	1.6879	-1.6752	-0.2908	0.07897	-0.4004	-0.5583	2.7391	0.4456	-1.4931	0.1881	0.4889	-0.81	0.3188	-0.1929	-3.0021	0.00451	0.5583	3.6403	-2.7958	-0.2115
ABL1	0.7557	-0.9757	0.1602	-0.4031	-0.7167	-0.08505	0.2571	-2.9726	-0.2381	0.00205	-0.414	0.1047	-0.9926	-2.3328	-1.3716	-1.118	0.4069	0.8341	0.1278	-1.8678	-5.5205	-0.1939	0.09865	-0.003719	0.3328	-0.7899	0.6379	-3.0122	-0.3998	-0.8632	0.03669	-3.6238	0.02558	0.3376	1.3453	-0.6644	-0.4097	-0.3086	-1.1785	-0.5802	-0.9153	0.2584	0.3252	-2.5617	0.04988	0.8962	0.5659	-4.1944	-0.7927
DUSP4	-0.693	-0.697	-0.6582	0.0264	0.5203	-0.3055	0.4571	2.2072	-0.7145	0.3166	-1.4695	0.2367	-0.5973	4.0503	1.9341	1.8854	0.1451	2.0564	6.3373	-0.4712	-0.7179	2.011	0.3785	-0.5526	4.8488	0.5404	0.2675	0.03852	0.8787	1.8452	0.6323	-0.4753	0.5949	-0.07324	0.1782	-0.4119	-0.5817	-0.6612	-2.1148	-1.0855	0.1848	1.0896	0.3187	6.5424	-0.1919	-0.6296	3.954	0.5302	-1.4224
CCNF	0.1039	1.1018	0.04264	0.203	0.672	-0.1359	2.7383	0.9558	0.538	0.158	-0.5186	-0.0636	1.6623	-1.0136	-1.6457	-2.6081	0.5507	-1.4948	-2.3605	-0.01246	3.227	-0.9879	0.2447	-0.6202	-2.335	-0.2697	-0.6661	-0.5759	1.3143	-1.872	-0.5324	0.356	0.6657	0.5126	1.1006	3.2495	0.2743	1.1627	1.2825	0.4837	0.2621	-0.4117	0.01949	-5.2159	0.2835	-0.5331	0.00465	-0.5001	0.3834
PTPN12	0.07295	0.2189	-0.5675	1.942	-1.2082	0.2929	-0.07565	0.422	-0.5556	0.2731	0.2649	0.479	0.09631	-1.3706	0.3083	-3.8335	-0.3818	1.1486	2.8196	-0.817	-4.8566	0.9052	-0.7273	0.5624	2.3228	1.0471	0.5955	-0.004113	0.4612	-0.2044	0.9165	-0.6207	-1.3728	0.5553	-1.6656	-1.5188	-0.5396	-0.1008	-0.7641	-0.409	0.5856	-0.3189	-0.04562	5.2213	0.1656	-0.6158	3.0743	0.8941	-1.3983
HSPA1A	1.1049	-0.5285	-0.9937	1.7694	0.1916	-0.2154	-0.5063	0.2377	0.01102	-0.7464	0.06555	0.5237	0.04289	-0.9474	-0.9286	-0.6736	-1.4987	-0.2894	-0.1941	-0.9492	-0.2483	0.6912	-0.09025	1.2456	0.1238	-0.1377	-0.3064	-0.5054	-2.0442	0.4404	0.2914	-0.9271	0.01405	0.495	-1.5446	0.8856	-0.9016	-0.4769	-1.0164	-0.5807	3.2599	0.02413	0.146	-1.7414	0.6293	-0.3122	-0.5341	0.06228	-0.6121
PCK2	4.5261	0.7894	0.2865	-0.7043	-0.3205	0.4574	0.6649	-0.4836	-0.1168	0.5734	0.06695	0.0507	0.9245	0.9588	0.1502	1.5204	0.417	0.7094	0.6033	1.5388	1.5879	-0.7485	1.574	-0.8838	0.04754	0.8982	0.3135	0.2693	1.4449	-0.01422	-0.9146	0.6777	-0.1959	-0.3271	0.5157	-0.8904	0.5617	0.341	1.1407	0.4775	0.1669	-0.349	-0.1869	0.3129	-0.4711	0.1058	-1.082	0.3554	0.389
FAM57A	0.5241	0.3749	0.2877	-0.6689	1.0207	0.1926	0.3152	-0.2862	0.1566	0.06015	-0.9088	-0.8049	-0.6063	0.3968	0.7711	-1.6873	-0.3654	0.5824	-1.0638	-0.0803	-0.9577	0.3833	-1.003	0.6495	-1.0505	-0.5277	-0.4777	0.5469	0.5691	-0.2337	-0.834	0.04933	0.07863	0.1789	-0.5507	-1.3473	-0.1563	0.7083	0.09214	9.94e-05	1.1868	-0.01307	-0.3451	-0.9433	-0.02089	1.592	-1.9585	0.1072	0.4009
RB1	-1.3367	-0.3745	-0.6935	-0.4403	-1.2528	-0.1916	-0.6768	0.4458	-0.4493	-0.3296	-0.691	0.2666	-0.1102	0.27	-1.4934	0.8364	-0.6565	-0.5152	-0.6659	-0.5348	-0.4676	-2.5525	0.1043	-0.4234	-0.662	0.371	-0.481	-1.3383	-0.5996	-0.8028	-1.8408	-0.06852	-0.6645	-0.4966	1.1415	-1.3876	0.8742	-0.5298	-0.5953	-0.4826	-1.3551	0.03766	0.269	-1.2445	-0.3541	0.9479	-1.3109	0.1964	0.1732
EVL	-1.8273	0.5684	1.2722	1.1841	-0.2011	0.8967	-0.2334	0.3732	0.9618	0.6235	-0.1177	-1.4306	0.5701	-0.7035	0.8348	-1.2022	0.2885	-0.3832	-0.2674	-0.1428	0.5419	-1.1522	0.6675	0.4479	-0.355	-0.6917	0.2888	0.2472	0.135	-2.2362	0.4986	1.2495	-0.6787	-0.6065	-1.0099	1.5235	1.0396	0.6579	-0.3017	0.304	-0.02025	1.1176	0.694	-0.8043	1.6248	1.2461	-0.627	1.6126	1.3436
GFPT1	-0.6798	0.9699	-0.7159	0.05465	0.3685	0.6187	0.2869	0.5892	0.1531	-1.2211	0.6755	0.2082	0.1194	0.5499	-0.1043	0.7883	-0.5486	0.8051	-0.04447	0.5178	-1.1233	0.0936	-1.1562	-0.6305	-1.7209	1.2218	-0.1103	0.08438	-0.7655	-0.07212	-0.3533	-0.5167	0.6333	-0.1778	0.4183	0.1708	-0.5889	0.2534	0.8365	-0.189	0.8149	-0.4764	-0.1688	-2.0215	-2.0086	-1.0609	-1.6272	-1.1981	-0.04633
BLVRA	-1.0011	-0.4808	-1.77	-1.3681	-0.6751	-1.9618	-0.1141	-0.6206	-0.1463	-0.2227	-1.5005	-1.1796	-0.7228	-0.2671	-0.6004	-3.8086	-1.7951	1.0549	1.104	-0.5969	0.9861	-0.5194	0.6141	-0.0404	0.08832	-0.544	0.5093	-1.2683	0.1317	0.4898	-2.1568	0.1602	-0.2308	-0.9026	-0.5139	0.7409	-0.2928	-0.3426	-0.6189	0.228	-0.06525	-0.04763	0.2614	0.1158	-0.8241	0.3895	1.3851	-0.4034	0.4238
GPER	-0.1516	5.108	0.3557	0.1268	0.0721	2.8672	0.6237	0.755	1.0541	0.1364	-0.8765	0.2362	0.7614	0.8819	0.4138	3.6516	-0.5046	-0.8202	-1.0877	-0.02877	1.5003	0.1065	4.9141	0.6948	0.5058	5.0575	-0.7608	2.9042	-0.3722	0.4823	6.2808	4.0018	3.9961	3.4777	2.7367	-0.1432	4.1536	0.5593	0.4219	0.5418	0.5348	-0.372	3.5359	0.1723	0.3885	-0.7438	0.4257	0.7693	-0.5715
EAPP	0.5162	0.8066	1.084	-0.3697	0.0071	0.03968	-2.1065	0.146	1.0895	0.13	0.3325	0.4696	0.4411	-1.0187	-0.4849	0.639	0.238	0.9197	-1.9727	0.1345	5.0903	-2.0146	0.1647	-0.1724	-0.5007	0.2079	-0.7722	-0.1105	-0.4169	-1.5882	0.05339	0.9267	-0.08791	-0.3076	-1.5942	-2.4788	0.2855	1.38	1.4835	1.1028	0.6339	-0.3022	0.4976	-0.1002	-0.7307	2.8368	-2.5348	-1.1337	0.4177
S100A13	1.2552	0.6374	0.7183	0.4339	1.0957	0.4527	0.5342	0.815	0.05917	1.2236	1.41	0.7085	1.2115	2.5443	2.6634	-3.4293	0.1753	0.2152	3.5483	0.6658	-5.2519	2.3867	0.8484	-0.02958	7.9392	0.5368	0.2974	0.3437	0.6719	5.7772	0.8086	-0.2216	0.9075	-0.3154	-3.7888	5.2119	0.2993	0.0164	0.8787	1.7016	0.7635	-0.2264	-0.3148	6.5969	-0.593	0.2272	5.1615	0.1063	0.2217
EXT1	0.6097	0.1309	1.0389	-0.15	0.3246	-2.7799	1.8808	0.6983	0.04117	0.9035	1.5793	0.4979	1.2759	1.2799	0.61	1.0769	1.9311	1.2342	-0.9923	0.9419	-4.8875	0.6382	0.3474	-0.5352	0.05914	1.1054	0.5137	1.358	-2.3015	1.4276	0.7775	0.5004	0.9092	0.4413	-1.6754	-1.7448	-1.1101	-0.07176	-1.3103	-1.679	-0.3834	0.244	-0.06092	-2.005	0.3054	-0.2392	-1.7446	-1.1804	0.6357
MYBL2	-1.9093	0.3782	0.2774	0.5659	0.2456	0.7897	0.0471	0.6423	0.6552	-0.3482	0.8649	-0.5806	0.8126	1.887	-2.0735	0.6739	-0.1596	-2.4816	-2.0946	0.9724	-0.03425	-2.0056	-0.2523	0.4062	-5.4907	-1.0476	-0.9679	-0.09768	-0.5732	-4.4907	0.9543	0.401	-0.1551	-0.3314	0.1386	-2.4027	2.1906	0.3612	0.191	1.8157	-0.3696	-0.06459	-0.6036	-7.424	0.9916	0.2593	-5.9467	0.1807	-0.2007
POLE2	-0.7048	-0.0865	1.9589	-0.0064	-0.07095	-0.6587	0.174	0.3368	0.8162	-0.038	2.8379	-1.7017	0.6653	-0.6354	-0.0046	-0.7509	2.8176	-0.3775	-2.7342	-0.9998	-2.0325	-2.1575	-0.1285	0.4449	-1.1411	0.1871	-1.1219	0.0007738	0.3317	-0.8504	-0.5929	0.0112	0.2535	-0.534	1.4159	-0.4425	0.03344	-0.3621	2.4535	1.5373	1.0867	1.2732	0.06833	-2.3777	-0.5148	-0.5304	-1.5292	0.9901	-0.01392
STX4	-1.3319	-1.1285	-0.7813	0.8089	0.023	-0.523	0.0714	0.111	-0.3619	0.1623	-1.2093	-0.7335	-0.5195	-0.7516	0.3715	1.9226	-2.6749	-1.2013	3.9319	0.6875	-0.3628	2.25	0.1294	1.406	2.506	-0.8298	1.1663	-1.0676	-1.2266	2.5277	1.3109	-0.8085	-0.3584	-0.4735	-0.4348	0.9817	-0.1906	-0.9331	-1.1802	0.3077	0.6363	0.8917	0.4699	2.0742	-0.1677	-0.3686	1.0676	-1.0662	0.1105
PLCB3	-0.3553	1.0664	0.7639	-0.3446	0.6252	0.09733	0.7544	0.09942	0.8791	0.6553	0.6093	0.8868	-0.2212	0.6297	-0.03225	2.5255	-0.8008	0.536	0.9377	0.7052	4.2172	-0.7878	-0.226	-1.1575	0.5563	-0.7609	0.2874	-0.4768	-0.9043	-1.018	0.767	0.4874	0.04441	0.2034	4.1864	-1.1003	0.05568	-0.05937	-0.724	-0.5256	-0.1609	0.4492	-0.3409	0.6606	0.3271	-0.04461	0.2932	-0.5265	-0.1195
TMCO1	-0.06635	1.7457	0.8226	0.4877	0.6428	0.6501	-1.0657	0.5492	0.3227	0.6879	0.2376	1.032	0.5827	0.7974	2.1169	-3.5727	1.1173	-0.91	-0.9533	-0.3881	-4.7791	-0.7632	-0.418	-0.2593	-2.1363	0.3051	0.7373	0.1573	-0.7144	-0.9636	0.5367	0.3234	-0.8386	0.2771	-3.8681	-2.8258	0.0385	0.4193	0.4011	0.9358	2.1169	0.2533	0.3841	-1.7377	-0.1348	-0.283	-0.3626	-0.8999	0.9734
C2CD2	0.5081	1.3748	-0.09305	1.0922	0.6673	-0.02567	-0.1647	0.2127	0.3297	-0.1035	0.1372	-1.117	-0.8466	-1.4931	1.0132	1.0889	0.2265	0.5543	0.7713	-2.1334	5.1337	0.4851	-0.3341	-0.2015	2.4239	-0.2942	1.2247	0.2041	0.9167	1.5599	0.2707	2.5111	-1.6196	-0.6051	-0.04899	0.6783	-0.3442	-0.02602	-0.2257	-0.3783	1.2666	0.2614	0.1819	2.1029	-0.7057	2.9625	2.596	-1.3198	-0.7014
PARP1	1.3707	1.6093	1.3604	2.2379	1.7026	1.5477	0.9011	1.9041	0.9954	1.2125	1.9097	0.5901	2.1516	1.4087	0.9677	1.4915	1.7119	1.0675	-1.2622	1.8155	3.8809	0.425	1.0674	-0.3239	1.1263	1.2425	0.4537	1.8953	1.6788	0.9158	1.9874	0.9152	1.4339	1.9312	1.6748	0.2442	0.5456	0.6704	0.784	1.0349	1.5535	-0.01066	1.0695	1.1197	0.9968	0.03874	1.4724	0.7343	0.8452
ANKRD10	0.3333	-0.0119	1.4213	1.0373	1.1052	0.8366	-0.924	1.442	-0.06668	0.8359	0.5001	3.4655	0.5555	-0.429	-0.3785	-0.8697	0.8623	-1.2583	1.2523	-0.3928	0.9562	0.5495	0.05645	-0.4075	0.3985	0.2165	1.2419	1.5019	0.346	1.0667	0.5769	0.5045	0.6047	2.0145	1.8241	0.2272	1.0031	0.007167	0.9924	2.2883	2.4769	1.1943	1.7791	1.0962	-0.2166	0.1753	3.0426	0.4458	-0.9463
CCDC85B	-0.05498	-0.169	-0.9895	1.8991	-0.771	-0.1329	0.4708	-0.3917	0.6172	-0.6413	1.0002	-1.4595	0.2494	-1.6625	-0.02105	2.0543	-0.2182	-0.4201	-0.8097	0.8596	-0.3346	0.4507	-0.6201	-0.04573	0.6978	-0.2912	-0.985	-1.4105	1.4246	0.1783	0.7886	0.6625	0.7767	-1.1281	-1.9494	-1.0466	-0.4436	0.312	-0.3064	-0.3001	-0.6398	-1.0177	0.1396	0.00643	-1.3951	-0.1093	-1.6805	-0.498	0.2244
DDB2	1.9875	2.7887	-0.02986	-0.5084	-0.9688	-0.9832	-2.3425	-1.7984	-1.0724	-0.8376	-0.5994	-0.9032	-0.6457	2.552	-1.7221	-0.4195	-1.0733	0.2226	0.1307	0.6108	0.3491	-2.6133	0.3423	-0.6305	2.3898	0.8529	-1.0717	-0.2634	3.5697	-2.042	-0.308	-0.105	0.8409	0.9709	2.2335	-3.3733	-1.0051	-0.1262	-0.8575	-0.7353	-0.2754	0.3837	0.209	1.2221	0.2361	0.4031	1.3625	0.8554	-0.6169
DDX10	-2.0623	-2.8914	-0.01122	-0.3564	0.6578	-0.1212	-0.2787	-3.2221	-0.1382	0.2096	0.2021	-0.0956	0.2944	0.3687	1.1191	0.3932	0.6502	0.7096	-0.449	0.5143	-4.0825	0.2157	0.2087	-0.6429	-3.048	-0.8024	1.5095	-0.2993	-1.8892	1.6561	0.8829	0.2806	0.1685	0.5086	-0.8225	0.8145	0.05749	-0.6946	-0.01609	0.2214	0.621	-2.8273	1.2578	0.3362	1.2445	0.04762	-0.1694	-0.2602	0.4683
BAMBI	0.2958	0.6047	0.1659	-0.2377	-0.5641	-0.1381	-0.6539	-0.3922	0.1592	0.2413	0.5565	1.2376	0.005994	1.1528	-1.1941	0.844	0.2345	1.0398	3.6395	0.2242	0.4926	0.5419	0.6061	-0.1	0.9604	0.4403	1.3468	-0.567	0.2232	0.7886	-1.3233	0.05774	-0.3178	-0.09899	0.1461	-1.0785	0.04256	0.1612	-0.4279	-0.06377	0.3043	0.7115	-0.1278	0.8943	0.7835	-0.7289	-0.8741	0.4766	0.3837
CEP57	0.1866	-0.3398	0.6384	-0.9918	1.0231	-0.01572	-0.0288	0.7634	0.03171	0.1106	-0.4334	-0.5058	-0.6487	0.8574	0.2914	1.0913	-0.6535	0.07647	-0.441	0.1658	-0.7237	0.6557	-0.6136	0.1747	-1.015	0.3077	0.06592	0.08113	1.0211	-0.03164	1.1282	0.2015	0.3729	0.1983	0.4869	0.6066	0.8765	-0.09836	1.0806	0.8318	0.8038	-0.07099	0.799	0.4854	-0.1357	0.549	0.6464	-0.4984	0.3667
HADH	0.8169	0.07305	0.05312	-0.3515	-0.2521	0.3929	-0.892	-0.2049	0.2811	0.2041	0.7567	-0.9099	0.3256	1.0995	-0.2017	2.9862	0.9144	0.04402	-3.6719	0.07361	-2.2308	-1.2857	0.3715	-0.5386	-0.1555	-1.244	-0.5084	-0.1006	0.3004	-0.09692	-0.09456	0.8197	-1.5066	-0.009763	1.1421	0.2648	0.06183	0.1329	0.2414	0.1269	-0.8039	-0.5675	0.4681	-2.5812	-0.9849	-0.01584	-0.5933	-1.3048	0.2942
RAB31	-0.1642	-0.3104	-0.4115	0.4671	1.7588	-0.2987	0.9246	-1.2996	0.4187	-0.626	1.811	2.4081	2.3213	3.6225	-0.8549	0.8989	0.04691	-0.5271	3.9284	-0.3178	-0.5386	2.0886	0.1228	-0.1946	1.2348	-1.6341	0.4192	0.5508	5.0274	0.5658	-1.101	0.07602	3.4082	-0.7101	1.4754	0.6867	0.1803	-0.2309	-1.1263	-0.4094	2.0346	3.0866	0.7951	3.1991	-1.1028	1.2225	1.8574	-0.06621	-0.2917
ABCC5	-0.3208	0.4013	-0.2765	-0.0473	-0.8411	-1.1195	0.3149	0.7335	0.7798	0.2952	0.173	10	-0.563	-0.5371	-0.0012	0.4683	0.0923	0.4386	-0.3101	-0.5385	1.6911	-0.1128	-0.0372	0.6184	0.6285	-0.06262	-0.2084	-1.413	0.07554	-0.2569	-0.07019	-0.6819	0.4191	-0.3645	0.4962	0.8722	0.8637	-0.289	2.1468	6.8794	0.05765	0.009098	0.1303	0.02103	0.263	-0.6767	0.6258	3.1917	-0.1782
GLRX	0.4446	0.1098	-0.4517	-0.3866	-0.1285	-1.1906	-0.4331	-0.396	-0.7592	-0.0495	-1.4802	0.3748	-0.8161	2.1528	2.0628	-2.974	0.597	2.4637	2.9855	-1.4793	1.5518	3.6498	0.2195	-0.08752	6.1344	0.5208	1.063	-0.05788	0.05133	3.0669	0.1424	-0.5238	0.3372	-0.2148	-2.9329	0.726	-0.2432	-0.5808	0.0684	-0.1828	-0.2789	0.1235	0.4885	6.7879	-0.2475	-0.5518	5.2621	-0.6173	0.1438
MVP	-1.051	-0.3262	-0.3394	0.1112	-0.1174	-0.2754	0.4748	-0.6682	-0.7829	-0.6828	-1.186	-0.3543	-0.9744	-0.1083	-0.5105	-3.8474	-1.7643	-0.03814	4.3706	0.3636	-4.7694	1.0211	-0.1225	0.109	2.8748	0.3186	0.4212	-0.4461	0.2808	1.4921	-0.6736	-0.874	0.2828	-0.1951	1.159	-0.4068	-0.07142	-0.1071	-1.8061	-1.2431	-1.1358	0.4329	-0.1842	3.655	0.05148	-0.6493	1.0107	0.518	-0.6535
RFC5	-0.9252	0.2689	-0.1914	0.6772	0.00545	3.1664	-0.3983	-0.3049	-0.3866	0.037	0.1539	0.0797	-0.6423	-0.8855	1.0961	0.9547	0.6487	-0.9573	2.1017	-0.6809	10	-0.8199	0.2919	0.2299	1.7272	-0.998	-0.2154	-1.1496	0.2712	0.5549	-0.449	2.241	-0.3022	2.5617	-0.8239	1.854	-0.07208	-0.6305	-0.2389	-0.2603	-0.093	0.7092	0.2734	-0.2414	0.1128	-0.7045	1.4019	-1.4494	-0.4691
HES1	2.0807	0.2789	0.2859	-0.9297	0.0444	0.263	0.1266	0.6137	0.5645	0.2878	0.5108	0.3267	0.1738	0.03545	1.0559	3.6735	1.531	0.606	-0.2777	-0.625	0.5288	-0.747	-0.277	-0.5967	3.9096	0.188	0.001672	1.4492	0.8001	0.7607	0.315	0.04358	-0.6818	0.4229	0.7583	-0.4542	-0.01397	0.1221	2.1539	0.6391	0.4888	-0.2765	-1.1849	5.8271	-0.1914	-0.9371	0.2261	0.9884	0.162
STMN1	0.7792	0.1427	0.8492	-0.8044	0.2007	-0.01069	-1.0468	0.3736	0.7077	0.4783	1.499	-0.7848	0.2662	-0.8497	-0.1958	-2.775	1.4346	1.4147	-1.0375	0.3045	-1.2944	-0.4207	0.1975	0.1515	0.02101	-0.7278	-0.1926	-0.2168	0.3685	-0.05388	0.2717	0.4059	-0.02849	0.221	-1.6527	0.7003	0.5109	-0.1954	-0.496	0.68	-0.7147	0.001081	0.8361	-2.2464	-1.063	-0.0691	-2.5194	-0.559	0.09091
GALE	1.6273	0.3516	0.6049	1.0193	0.095	-0.5687	0.2032	0.4049	-0.08692	-0.478	-0.01545	0.4156	0.7044	0.7574	0.5279	0.3992	-0.2266	1.129	2.4835	0.4958	-0.6991	0.7085	0.2314	-0.4929	3.0736	0.8691	-0.1906	0.3289	0.6528	1.2193	-1.276	-0.05322	0.7378	0.5372	1.6356	-2.8645	-0.5702	-0.1233	-0.9961	0.2698	-0.1357	-0.2924	-0.3662	2.7485	0.2297	-0.4062	1.7429	0.08732	-0.9841
KLHL9	-0.2173	0.01565	-0.1415	-0.6992	1.6084	-0.7236	-1.0214	-0.08297	0.9066	1.691	1.4781	-0.9024	-0.4136	-0.546	-0.1887	-0.09181	1.8801	0.4405	0.1448	-0.3979	-0.4734	-0.7146	-2.7729	0.529	-0.7619	0.04454	0.7783	-0.9715	-0.7838	1.4695	-0.4029	-0.1752	-0.6508	-0.1041	-0.2644	1.1017	0.7665	-0.04773	2.4155	-0.5815	0.0088	-0.7657	2.7547	-0.7021	-0.1121	1.0073	-1.5343	-0.4941	0.3738
PTPRF	-1.0298	-0.513	0.5755	0.1884	-0.1094	-0.1232	1.0501	0.2409	0.3397	1.0622	0.6151	1.2859	0.7668	-0.3835	0.6115	2.3086	-0.2176	0.3102	1.0131	1.2248	-0.478	0.3352	0.7977	-0.5819	-1.0994	-0.1018	0.2696	0.7544	-0.7273	0.5603	-0.4758	-0.04114	-0.2145	0.2078	-0.3556	0.3798	-0.05218	-0.1819	1.0048	1.1224	0.487	0.3859	0.7954	-1.648	0.3969	0.08908	-0.5078	0.391	-0.9051
UBE2J1	-0.3921	0.3418	-0.05538	0.101	-0.5789	0.6513	0.00445	0.3069	-0.04932	-1.1119	-0.3637	-0.6507	-0.6688	1.2558	-1.3103	0.9532	-0.1647	-0.04232	-0.9191	-0.03988	0.4192	0.8208	-1.2506	0.347	-0.9792	-0.6437	0.7223	-0.3695	-1.1429	-0.6703	1.1134	-0.04288	-0.2598	-0.0552	-1.1059	-0.178	0.04845	-0.04363	-0.5052	-1.4037	-1.3706	-0.1246	-1.2168	-1.7787	-0.7569	0.4667	-1.2129	0.01893	0.5859
PGM1	-3.6022	-0.6804	-0.94	-0.8182	-0.8356	-0.5028	-0.9471	-1.5582	-0.6809	-1.0143	-2.59	-0.989	-1.2497	1.2465	-0.9118	-3.646	-1.1323	-1.6782	0.9611	-0.2953	0.2685	-1.8095	0.0834	-0.4793	-0.9433	-0.3195	0.06159	-0.704	1.1706	-1.5616	-2.3686	-0.1182	-2.2272	-0.8004	-1.9289	-3.815	-0.2481	-0.459	-0.4246	-0.5187	-0.4509	-0.6297	-0.8316	-2.7881	-0.01595	1.4466	-0.2094	0.253	0.2438
SLC37A4	-0.8972	0.0795	0.6236	1.7399	0.294	1.5177	-0.7664	2.1684	1.3328	-0.45	3.0903	-0.1364	0.08018	-1.4841	-0.075	0.7157	0.4016	-0.5303	-2.3203	0.269	0.392	-1.7524	0.2104	-0.9408	0.2908	0.524	-1.6863	0.3881	1.0111	-1.9221	-1.6461	0.02433	3.1889	-0.3603	1.2379	0.2689	0.4934	2.2745	-1.1032	0.3344	4.4583	-0.9207	-0.04377	0.4353	0.1142	1.6046	1.7669	0.3269	0.3095
LOXL1	-1.0022	0.4245	-0.4229	-0.9004	-0.2284	0.2924	-0.3024	-1.0837	0.4259	-0.2614	-0.3024	-0.1771	-1.186	-1.7116	-2.2148	-3.0277	0.05077	-1.3411	-0.3892	0.363	1.0089	-4.1222	-2.4016	-0.1251	-2.9715	-0.02016	-1.9342	-0.285	0.8128	-3.4036	-1.4052	0.3778	-0.1476	0.1486	-4.0061	-3.1255	0.08753	0.586	-1.2354	0.6197	-0.02975	-0.8045	-0.02755	-4.1948	0.08172	0.8567	-5.2491	0.7161	-0.2678
PLK1	-1.306	-1.3808	-0.1492	0.0789	-0.6603	-1.008	-1.5099	2.2048	-0.6281	-0.4694	-0.2209	-0.4594	1.6591	-8.3037	0.8173	-3.4012	-0.625	-0.6906	-5.9547	-0.4135	4.9577	-3.3999	2.4918	1.0419	-0.3829	-0.8944	-1.2576	-0.7801	-1.1007	-1.8971	0.8204	0.2809	-0.6226	-0.7524	5.0808	-0.1148	0.3019	1.679	1.9827	-0.7786	-0.6017	-0.327	1.2846	-3.3528	0.8859	1.0916	-3.6876	-1.3716	-0.188
MYO10	-2.1828	-0.3484	-0.2396	0.09115	-0.07695	-0.1541	0.489	-0.5761	-0.1916	0.2331	-1.2941	0.5784	-0.8913	0.7141	0.4994	-1.4733	-1.0003	-0.5773	-0.1018	-1.2269	0.4087	0.9993	-0.17	0.8067	2.3943	-0.6369	1.2458	-1.0282	-1.6913	1.8053	0.3415	-1.2184	-1.364	-0.6067	-2.3504	0.4059	-0.4799	-0.4589	-0.8925	-0.7292	1.0361	0.1498	-0.1314	1.6698	1.1033	0.3259	0.6484	-0.007218	-0.4983
NPRL2	0.006862	-0.33	0.8432	1.3065	0.9701	0.7199	0.5498	-0.1622	0.294	0.9014	-0.4705	2.6635	1.0451	0.6672	0.5535	3.0164	0.4155	-1.2872	-0.8233	0.2801	0.5703	0.9135	-0.0283	0.7899	0.9973	0.8333	-0.1494	-0.1008	-0.5513	0.6134	1.1237	-0.06853	1.6364	1.948	0.7633	0.318	2.0204	1.357	0.4579	0.1399	0.3743	-0.1747	1.2274	-0.3782	2.1134	-0.5446	3.3663	0.1698	0.4674
LIPA	-1.6652	0.7469	-0.2147	-0.8269	-0.3701	2.5636	0.04415	-0.5484	0.2356	0.1182	-1.2178	0.7215	-0.3545	0.2865	-0.2516	0.1613	-1.6127	-1.2792	1.9151	-0.757	2.8662	-2.0787	-0.5525	-1.2441	-1.3282	0.9016	1.5744	-0.03124	0.2901	-1.7158	-2.7229	0.3939	-0.2172	1.1942	-1.6735	-1.8144	0.816	0.4634	0.9255	1.2167	1.2948	0.02773	-0.4298	-3.1998	-0.6598	-0.4834	0.7433	0.651	0.7479
PWP1	-1.0212	-0.5744	-0.6327	-0.7345	0.2533	-4.0513	-0.7972	-0.3431	-1.255	-0.00915	-0.8373	0	-0.7075	-3.4861	1.215	-0.9021	-0.07058	0.5442	0.2465	-0.7366	-2.0003	0.6406	0.5592	0.1618	-2.6719	-0.9071	-0.3683	-0.94	-0.8647	0.6126	-0.02017	-0.192	-1.4329	-2.6713	-0.9725	0.7332	-2.3883	-1.2032	-0.6729	-1.3062	0.00455	1.1468	0.6627	-1.7393	0.343	0.3213	-2.038	-0.3674	-0.5706
PHGDH	8.7612	-1.241	0.2478	-0.9897	-0.3794	0.09323	0.1223	-0.5096	0.3989	-0.9821	1.415	0.1096	0.8483	0.8739	-2.4378	-1.926	0.106	-2.3493	-6.5397	-0.4787	-4.781	-2.7779	2.8948	-0.1994	-1.4384	0.05346	-1.7626	-0.3576	0.4268	-2.444	-1.465	1.2796	-0.4526	-0.5228	-4.4186	-1.59	0.5651	0.3906	0.1589	-0.1891	0.2151	-1.0029	-1.1117	-2.7231	0.03257	-0.4724	-3.981	0.09317	-1.261
PLEKHM1	0.1373	-0.5026	0.136	-0.4493	0.2873	-0.08404	0.09515	0.07071	-0.04794	0.8982	0.3654	-0.5459	0.1791	0.8495	0.3647	1.5794	0.7829	1.5569	-0.8796	0.1414	2.4942	1.3243	0.263	-0.09903	0.9164	-0.05176	0.6251	0.8082	-0.06191	1.262	1.0235	0.1144	0.02115	0.1821	0.1692	0.6382	-0.2607	-0.2495	0.9686	0.04064	-0.5951	0.4223	0.1355	0.0832	-0.6083	-0.7561	0.527	0.594	0.7588
ST7	-1.1208	5.0451	0.3877	0.3652	-0.6119	-0.09049	-0.0975	0.06611	-0.8052	-0.5054	-1.5038	-0.6516	-0.244	-0.3672	-0.4684	0.6976	-0.3704	-1.5783	1.8333	-0.6608	1.4694	-1.0328	-0.7128	0.1932	-0.8514	-0.8352	-1.1912	-1.0306	-0.1601	2.1993	1.4547	-0.07175	-0.5019	-1.1342	2.2792	0.5359	-0.2914	1.7283	-1.094	-0.5172	0.5426	0.8021	-0.03079	-1.1303	0.2941	-1.1586	-1.292	-0.02248	1.0606
VAT1	4.105	-4.8675	0.5459	0.5766	0.2142	0.2307	0.336	0.5011	0.145	0.1387	0.4155	-0.9727	0.2221	0.4031	-0.1233	-3.0861	-3.4861	-1.7287	0.2621	0.6347	-5.037	1.901	-0.1189	0.3283	0.8603	-1.0065	-3.2231	-0.2728	-1.6492	-3.6648	0.2733	0.6394	-3.9535	-0.3237	-2.7566	0.3049	0.4289	-2.0055	-0.945	0.2613	-1.0108	0.007781	0.6059	3.254	-3.6251	-0.569	0.1722	-0.1394	0.3493
IKBKB	0.2421	-0.3993	-0.8104	-1.2321	-0.9721	-1.6384	-1.6177	-1.2531	-1.1151	-0.7629	-1.526	-0.7158	-1.2522	-0.5373	-0.6952	1.7389	-1.5804	-0.4288	2.1138	-1.1372	4.1167	0.4231	-0.6626	-0.619	1.9894	-0.3636	-0.5456	-0.6096	0.3526	1.0553	-1.1284	-0.3985	-0.6734	0.1561	0.03756	-2.6037	-0.779	-0.06347	-1.1594	-1.1777	-0.2664	0.08357	-0.8185	1.6258	0.273	-0.7323	0.05052	-0.1005	-1.4331
KIF20A	-0.6176	0.6185	1.3382	0.4114	0.4893	1.2529	0.2638	1.1642	0.7194	-0.0551	0.2468	0.5109	0.3398	-6.3451	-1.3482	-3.2738	0.03901	0.06483	-7.0938	0.9363	-4.7008	-2.4725	-0.5237	-0.0185	-2.9691	0.05975	-1.3665	-0.05243	0.2897	-3.861	-1.5574	0.4817	0.5576	0.9041	-0.2537	0.8076	0.7359	0.7363	-0.7184	-0.1498	-1.3438	-0.4429	0.2639	-5.8833	0.7913	-0.06708	-2.9852	-3.666	0.6243
CDH3	-0.7741	3.1498	2.4396	1.0126	-0.6272	2.0159	0.1238	0.04474	0.865	-0.04735	2.7987	1.2855	1.7379	-0.3837	-0.3433	2.3867	-0.1576	-0.3364	1.668	1.8428	1.2284	2.775	-0.6532	1.4941	0.5814	3.3514	0.0737	1.0664	0.4208	0.8592	-0.07649	2.0359	0.7506	1.8957	-0.2248	0.3992	0.5572	1.9643	1.7081	-0.2772	3.3016	-0.4506	0.2072	2.2728	-0.3124	0.3738	-0.2663	3.1917	1.4185
PCM1	0.04498	-1.0574	-0.9479	0.2781	-1.1183	-0.1654	-2.0012	-0.5197	-0.4065	-1.0903	-2.2317	0.196	0.528	-1.1817	-1.7979	-4.2184	-0.5491	-0.5239	-1.2209	-1.7806	-0.0555	-1.4726	-0.5729	0.4104	0.5185	0.3165	-1.117	-0.5498	-0.3413	-1.8915	-0.8283	0.2124	0.5045	0.6883	1.3426	0.5724	-0.1042	0.4569	-0.7851	-0.8426	-1.551	-0.4062	0.468	1.2589	0.5988	0.51	-0.8403	0.5409	0.01492
IER3	0.6657	-0.4831	-0.7176	-0.4315	-0.8017	-0.6025	0.2471	-0.7128	-0.538	-0.166	-1.1664	-1.3372	-0.9998	0.5941	2.4338	-2.4208	-0.1245	-1.2285	8.3419	-0.6709	0.3443	3.5701	-0.1887	-1.4609	3.0479	-0.721	2.4786	-0.6229	-1.7245	2.8317	1.0617	-0.4665	-0.214	-0.4433	-0.6455	-2.1368	-0.4849	-0.1584	0.3366	-0.5463	0.1826	0.2759	0.3076	8.5953	-0.7059	0.1189	3.0558	0.4956	-1.0283
SSBP2	0.3916	0.2474	1.2821	-1.0881	0.673	1.0379	0.4578	0.6199	2.2011	0.5931	0.4267	-0.4159	-0.3583	1.0158	-0.3326	3.7276	-0.7187	-0.2909	0.04083	1.5465	2.9567	4.7543	-0.4349	0.3382	-0.6024	0.708	-0.05845	1.5074	0.9534	2.0194	0.04829	0.3499	0.7347	0.3958	-0.03328	-0.0166	1.0307	0.4446	3.1165	0.4123	-0.7343	-0.8421	-0.2802	-1.1196	-1.0737	0.8357	3.3155	-0.244	-0.02308
FAT1	0.6422	0.7631	0.05807	-1.1023	-0.6702	0.06997	0.4575	0.6422	0.5317	0.9242	-0.8053	0.4013	-0.4328	0.5052	-1.9662	-3.5568	0.2152	0.6009	-2.7841	0.368	0.4606	-0.7365	-0.3662	0.4496	-1.2899	-0.4981	0.4758	-0.2903	-0.593	-0.6083	-0.8951	-0.702	0.3198	0.6829	1.289	-0.9757	-0.3832	-0.3466	-1.1187	0.06587	-0.6132	-0.04206	0.131	-2.253	0.7686	1.1387	-2.7883	0.6115	-0.4542
SNX11	-0.2053	0.6431	-0.7047	0.5987	0.5409	0.2288	-0.4029	-0.04921	0.4757	-0.6406	-0.3724	2.0874	-0.2938	-0.1496	-1.3193	-2.9419	-0.6789	-1.6992	0.1701	-0.02775	0.7066	-1.7942	-0.08705	-0.03465	-1.7929	0.712	2.7693	0.2194	-0.3119	-2.9953	-1.0115	-0.4811	-0.5207	4.1821	-0.5593	-1.521	-0.3772	0.608	-0.1012	-0.8301	-0.3467	0.2259	-0.4421	-0.2742	0.3275	0.2392	-1.8773	2.8104	-0.3592
RNMT	-0.3879	0.951	-0.8204	-0.7807	-0.5673	0.5868	-0.9054	-0.7057	0.4062	-0.01685	-0.3827	-0.1232	-0.2829	0.008089	-0.2885	-3.4225	0.268	-0.8881	-0.2081	-0.1014	-1.1691	0.913	0.0407	0.01444	-0.5231	0.2104	-0.1108	-0.3302	-1.6982	-1.1371	-1.8548	-0.2514	-0.695	0.1103	-1.5155	3.0445	-0.7829	0.4907	-0.9224	-0.4074	-1.1583	-0.6852	-0.1119	-1.6318	-0.1771	-0.3199	0.342	1.3992	0.3159
SFN	0.8078	0.2565	0.6531	0.7914	0.4516	-0.2988	1.1448	0.9171	0.6928	-0.4505	0.5566	-0.7836	0.3055	0.1844	-0.4923	-1.5899	-1.0733	0.9339	4.3872	0.3076	0.1338	-0.2817	0.00945	0.3825	-1.8947	0.9381	-0.4514	0.9961	1.3707	-0.9125	0.0157	0.6442	0.692	0.3797	-0.1773	-1.498	0.9395	0.245	1.7537	-0.6639	-0.2646	-0.8039	0.2812	0.8115	0.443	1.4282	0.3522	0.219	-0.2018
EGFR	0.21	0.2731	-0.2411	-0.5457	-0.1458	-0.6558	0.2321	-0.4055	-0.1967	-0.01865	-0.03395	0.1915	0.3902	0.1513	-0.034	-0.1193	-1.2351	-0.4632	0.3874	-0.3032	0.7067	0.1537	0.7498	0.304	-0.2868	0.6849	0.2966	-0.262	-0.4321	0.09785	0.2909	-0.3823	-1.1452	0.4141	-0.09521	0.2314	-0.448	0.3684	0.6371	-0.5002	-1.1468	0.1175	0.5482	1.0368	1.1016	-0.2994	0.3516	0.4543	-0.9362
RFX5	-1.8868	-0.5865	-1.1199	-0.2289	-1.1012	0.03377	-0.7364	0.3069	-0.8606	-1.46	-1.4958	-1.4115	-2.3686	-1.2244	-1.295	-2.1144	0.3568	0.7422	-0.979	-0.3399	-1.4754	0.05175	-0.3158	-0.7088	-0.4245	-2.3841	-0.8944	-1.1553	-0.05832	-0.4006	-2.0367	-0.1762	0.2452	-0.5023	-0.1392	-0.9773	-0.4976	-1.0176	-2.102	-0.4612	0.191	-0.5344	-0.7887	-1.6138	-1.0432	-0.331	0.3542	-1.6414	-0.1507
NET1	-1.5046	0.1321	-0.6476	0.0313	-0.337	-0.5568	-1.3388	-0.6355	-0.6047	-1.6762	-0.6257	-0.2872	-0.1358	-0.9973	0.2419	-3.0766	1.4538	0.5184	1.0056	-2.4474	-0.7034	-0.048	0.1137	-1.1711	4.1644	0.8131	-0.428	-0.4408	0.2209	-0.4738	-1.2194	-1.1063	-1.6402	0.7766	0.3739	1.0298	-0.4997	-0.2967	-1.1966	-1.101	-0.9123	-0.5868	-1.1475	7.438	0.9546	-0.2758	0.7853	0.6479	-1.4009
PKIG	-0.44	0.6902	1.2684	0.0276	0.5603	0.794	1.0084	1.6153	0.5928	1.7758	1.9209	-0.0819	0.2532	1.2708	-0.0722	0.4797	0.1863	-0.9086	-0.5467	1.7682	-2.8882	0.4126	0.3412	-0.1904	-0.3805	-0.2803	0.2797	1.0414	-0.8672	-1.4995	2.0041	2.0242	1.6104	0.2165	-0.7642	0.09217	1.6434	0.007836	1.1136	0.897	-0.2855	-0.3198	2.2703	0.9982	0.6673	1.155	-0.9634	-0.4698	0.8712
DECR1	-0.1814	0.2253	-0.2303	0.2785	-0.0405	-1.0065	-0.1168	0.04596	0.2418	-0.1918	-0.2137	-1.6806	-0.9465	-0.3582	0.0094	-0.484	0.02624	0.1084	-0.9914	-0.3099	-2.2484	-1.5653	-1.0336	-0.9101	2.0237	-0.5529	0.1697	-0.4768	0.7717	0.1877	-1.5015	0.5334	0.6936	-0.06734	-0.1102	-0.6146	-0.6761	0.02041	0.4985	0.6783	0.3489	-0.5116	0.08188	0.9591	-0.8526	-0.6237	-1.7363	0.01438	-1.004
FSD1	-0.4003	0.7167	0.7797	-0.3171	-0.4487	-0.09671	-0.7874	-0.7373	0.2337	0.3073	-0.6349	3.3246	-0.2514	-0.04079	0.3899	2.1544	0.9996	0.3879	-0.0575	0.3489	2.2712	0.4185	1.0529	-0.06901	0.4864	0.7157	-0.1906	0.7577	0.3653	-0.6316	-0.2277	-0.1446	-1.0628	-0.2713	-0.04303	1.4014	0.828	0.1111	0.4696	-0.6245	-0.3181	-0.4578	0.6917	0.2795	-0.5091	1.5019	0.2568	-0.935	1.6589
ATP6V1D	0.1982	-0.1866	0.07495	-0.4595	0.4215	-0.7428	-0.7825	-0.3398	0.07651	-0.05585	-0.2192	0.3248	-0.2681	-1.7755	0.7765	-3.2529	-0.07664	0.4412	2.3927	0.2961	-1.5782	1.3166	0.051	0.3299	1.8433	-0.6863	1.4571	-3.861	-0.07437	0.8776	1.4538	-0.1223	0.1777	-0.6126	-0.5704	-0.08273	0.01783	-1.4375	-0.1365	1.0798	0.2893	1.1312	0.6271	1.9118	-3.4348	0.2038	1.255	-2.4783	-3.555
CDK6	-1.8368	-0.1288	-1.1944	-0.1439	-0.0721	0.09487	-0.8512	-0.08331	-0.652	-0.2108	-1.5236	-1.237	0.2089	-0.4402	0.0207	0.448	-0.2233	-0.4998	1.5471	0.122	0.1125	0.4121	0.9922	-0.001871	-2.3798	-0.6217	0.4659	3.2513	-1.9901	0.2069	-0.2258	-0.3756	-1.469	-0.3412	1.0602	-0.6196	-0.4479	1.0194	-1.6105	-0.4793	-0.6466	1.2001	0.7639	-2.5251	3.9575	0.279	-0.4842	2.0567	2.3482
CDC45	-2.1459	-0.5249	-0.6974	-0.2584	-0.3963	-0.7613	-0.9712	-4.6471	-1.1861	-1.0461	0.2011	-7.1947	-1.1772	0.8007	-0.1178	1.1961	0.3793	1.4599	-2.3244	-0.17	-1.3083	-2.5849	0.0959	0.5798	-1.7007	-1.0688	-0.9263	-0.6638	0.06806	-0.9022	-1.2141	0.1171	-1.043	-0.8944	-1.4091	-2.9532	-0.4355	-0.3684	-0.8143	-0.2056	-0.0549	-0.9975	-2.5302	-3.4086	-0.7317	-0.8359	-3.0179	-0.4126	0.1561
NPC1	2.2053	0.6572	0.0133	0.09885	0.7991	0.1489	0.5013	1.1433	0.6398	-0.3654	-0.6998	3.3652	0.1528	0.899	-0.6313	1.3766	-1.2175	-0.6788	4.9188	-0.203	0.8485	2.8078	-0.258	0.5892	2.1872	-0.1629	0.02133	-0.7202	-1.358	1.6963	2.561	-0.3488	-0.507	0.4677	0.7522	3.8926	-0.9021	0.1568	-0.221	0.08231	0.921	1.0175	-0.5827	4.3133	-0.3962	-1.0629	4.7683	0.1622	-1.589
EDEM1	0.1166	-1.0922	-1.7599	-1.5897	-0.8126	-1.0275	-0.3988	-0.8784	0.2337	-0.6847	-1.6202	0.2681	1.6221	0.2433	-0.0566	1.021	-0.3163	-0.5152	1.2942	-1.0794	5.4823	1.8162	0.4874	-0.7877	4.8329	-1.0362	1.4492	-1.3465	-0.2207	2.7645	-1.102	-0.5202	-1.8212	-1.2444	0.3322	0.288	-1.0072	-0.5912	-0.6013	-0.9934	-0.577	-0.02072	0.02124	7.5772	-0.3385	5.5206	3.2678	-0.8505	1.4971
MEST	-1.3669	-0.1255	0.7442	-0.0505	0.2074	0.733	1.1909	0.3425	0.5403	0.919	1.0496	0.3357	0.4059	-0.1483	0.9276	3.0045	1.036	0.7957	-2.5511	0.6544	0.9249	-0.8259	0.4619	0.6438	-1.9763	0.4092	-0.3944	1.2441	0.9112	-0.1457	1.7977	0.1845	0.9281	0.6671	-2.0074	-0.5922	0.2744	0.189	1.2917	0.465	-0.3561	-0.1236	-0.49	-4.3629	0.8026	-0.6462	-4.0775	-0.1584	0.2754
MYLK	0.6476	0.841	-0.09529	-0.346	-0.198	0.1216	-0.1624	0.1951	0.1205	-0.5544	-0.0909	0.5343	-0.03524	-1.7244	-1.3651	-0.2625	-0.8654	-0.3288	-1.1905	-0.2308	-0.3278	-3.3446	-0.2504	-0.4226	-0.7522	0.8466	-2.3273	-0.5175	1.0469	-2.4384	-0.7365	0.4017	-0.2572	0.556	1.3226	-2.2838	0.1048	0.5582	-0.6401	-0.2302	-0.6574	-0.7614	-0.9054	1.3947	1.4216	0.2763	-3.514	2.4705	0.4207
PAFAH1B3	-0.8136	0.7115	0.1277	0.7266	0.5087	-0.5061	-0.3104	0.3215	0.3973	-0.4468	0.4542	-0.7297	0.1925	0.1831	0.3142	-3.0279	1.1431	-0.8249	0.3576	0.3533	-1.8015	-1.6004	-0.4622	-1.048	0.1489	-1.3799	-0.6156	-0.535	1.1541	-1.0826	-1.1145	0.9967	-0.07295	-1.4814	-1.8255	-0.4069	-0.1349	0.1482	-0.03838	0.5245	-0.05635	0.1269	0.1738	-1.2814	-0.4115	0.1733	-0.1987	-3.0315	0.412
CALU	-1.5407	0.9663	0.3274	-1.0071	0.4031	0.6138	-0.1138	0.6517	0.76	0.3543	-0.7752	-0.4957	-0.4975	1.7868	-1.0155	-3.0834	0.8482	-0.4824	2.2414	1.0846	0.3421	0.9977	-0.6583	-0.1495	-2.4091	-0.6316	0.674	-0.3888	-1.1692	-0.9705	-1.0539	1.0132	-0.5237	0.01587	-2.6695	-1.7293	-0.05455	0.2494	0.1139	0.406	0.3284	-0.6014	-0.1304	-2.0668	0.4213	0.6955	1.7074	-0.1127	0.3945
USP6NL	-1.6763	0.3809	-1.1512	-0.3817	-0.6731	-0.04951	-1.2884	-0.4032	-0.6329	-0.8638	-1.4592	-0.8601	1.7227	-2.5092	0.2551	5.338	0.2028	-0.7455	-1.2225	3.1299	-3.1523	-1.3017	-0.3171	0.8261	1.3492	-0.5284	-1.0084	-2.0188	0.1181	-0.11	-1.6863	-0.8699	-1.0215	-1.6279	2.2964	0.5728	-0.3902	-0.3395	-2.2951	-1.1941	0.6934	1.1815	-0.2068	2.0219	0.0445	-0.6371	0.8543	-0.1709	-0.4367
LGALS8	0.2739	-0.2063	0.1948	-1.1857	-0.1531	0.5219	1.3739	0.1213	-0.2693	0.1108	0.0824	0.497	0.7208	0.795	-0.3509	3.3429	-0.6575	1.2646	0.0997	0.7055	1.2243	1.3463	0.3622	2.1001	1.1218	1.5342	0.3774	0.6866	0.5067	0.8465	0.2288	0.107	0.1841	0.7662	0.574	0.2752	0.3827	0.3291	0.7106	-0.6726	-1.0391	0.06735	-0.37	1.8823	0.09328	0.558	1.5622	1.0027	0.3655
NT5DC2	-0.5869	0.2617	0.2417	0.8095	0.131	0.4656	0.7332	0.9147	0.8087	0.00655	0.641	-0.1165	1.0604	1.1632	0.6291	0.216	1.6942	-2.1005	1.8212	-2.3289	-3.4058	1.1547	0.3245	0.2565	-2.226	-0.96	0.07129	0.3291	-1.0272	0.2083	0.1803	0.6649	-0.7904	-0.2706	-3.7403	1.2282	-0.06006	0.3749	1.2405	0.9465	-0.2728	-0.4686	0.2032	-2.9879	0.1437	0.802	-0.1199	-1.1863	1.4203
CCP110	0.3772	0.6924	0.183	0.5578	-0.0101	-0.1257	2.967	0.2641	-0.2567	-0.5889	0.06465	-1.228	-0.2869	1.3701	0.976	1.2045	0.6542	2.798	-1.2496	-0.02587	-0.6586	4.5746	0.6454	0.08925	-1.5093	0.1374	-0.4835	-0.3817	0.842	1.1414	-0.03949	0.1095	3.7158	-0.1142	2.4276	-0.7956	-0.4277	-0.3636	2.4092	0.2212	0.6528	0.5123	0.9941	-2.1827	0.0927	0.2469	0.959	-0.1106	-0.2195
LRP10	0.4578	0.1885	-0.0819	-1.3718	-0.5677	-0.2333	1.1214	-0.4693	0.06285	-0.1383	-1.3724	-0.1901	-0.3274	-0.1195	0.3609	-3.5319	-2.0789	0.6983	3.0586	0.1117	1.5148	1.3412	0.7765	-0.4261	3.5267	1.003	1.1395	-0.3011	1.1223	2.2906	0.1939	0.006045	-0.1023	0.4323	1.5095	-2.3305	-0.1567	-0.394	0.2075	-0.1418	0.0566	-0.2745	0.1498	4.0663	0.531	0.2001	0.06816	0.9955	-0.329
ATP1B1	0.08876	0.77	0.3589	0.7072	0.2666	0.5629	0.574	0.1583	0.702	-0.5386	0.9866	-0.0656	1.1166	-0.2052	-0.1712	1.4225	-1.2442	-1.6854	-1.2208	0.3043	0.9118	0.023	-0.3088	2.5592	-1.5321	-0.1061	-0.5672	0.3239	0.6195	1.0872	0.9383	0.4864	0.3015	-0.3292	-1.6167	1.0356	0.01996	0.4267	0.7108	1.0627	1.2576	0.007437	-0.1924	-3.824	0.2386	-0.3629	-2.4575	-0.2291	0.2881
STK10	-0.006591	-0.5674	-1.2933	-0.708	-0.5307	-0.07657	-0.3378	3.3383	0.3699	-0.2324	-1.1886	-1.9133	-0.07094	-0.6318	0.237	3.8686	-0.1384	1.05	4.279	0.06697	-0.6704	0.3778	-0.2515	0.823	-0.5585	2.2018	-0.7722	-0.4526	-1.3345	1.0678	-0.7212	0.2002	-0.4042	-0.4258	2.5015	-0.6977	-1.0558	-0.4234	0.4379	2.7512	-1.327	0.5239	0.4542	-0.3106	0.3833	-0.06482	3.9056	1.4776	2.6058
OXCT1	0.6228	0.8909	-0.2026	-0.5422	0.5827	0.6531	0.03575	-0.09815	-0.1806	0.8131	-0.3938	0.8057	0.3229	0.9724	1.3414	0.7102	0.3011	0.1958	-1.0875	0.09591	0.9084	-0.4317	0.2532	-0.6934	-0.09817	-0.2233	0.7608	0.6158	0.4179	0.8943	0.1007	-0.02869	0.5383	0.3803	0.4677	0.4205	0.2723	-0.09586	0.4121	1.1896	0.4509	-0.3762	0.1139	1.0346	0.4826	0.8402	0.2029	-0.9231	-0.146
UGDH	-0.02768	0.1547	0.5632	-0.3195	-0.2201	-0.5709	-0.5615	0.4643	0.5697	-0.261	1.0225	-1.24	0.1149	1.0101	0.3939	1.0263	-0.2757	0.4916	0.3748	-0.07516	-0.2742	-0.01195	0.5051	0.3678	0.5706	0.2065	-0.2728	-0.3053	0.02985	0.2762	1.0877	0.4039	-0.5985	-0.6114	-0.1384	-0.7951	-0.03073	-0.04112	-0.001473	-0.4265	0.6209	0.5719	0.3734	0.5577	-0.152	-0.7091	-0.1818	0.732	0.588
SLC25A4	-0.06842	1.2273	0.396	-0.01275	0.0236	1.4998	0.7808	0.479	0.8708	0.1606	-0.8146	0.8391	0.08466	2.6446	-1.0692	-2.7425	-1.406	0.5627	-3.2933	0.7183	-0.0327	-0.4159	-0.1115	0.6437	-3.2404	0.7785	1.0413	-0.1889	-0.1642	-0.6169	1.0631	0.28	0.8548	-0.6209	1.1743	-1.7976	0.722	0.5225	0.4199	0.7893	0.9435	0.05074	-0.4627	-3.3631	0.1666	1.8349	-2.3517	0.9179	-0.1313
SQRDL	-0.4778	-0.3262	-0.002521	-0.02165	-0.9319	1.7777	-0.6105	-0.2192	0.9043	-0.0363	2.8415	0.1342	-0.9342	1.063	0.5792	0.7073	-1.8174	0.6367	2.6978	-0.02546	4.7787	0.6956	0.2797	1.0309	1.9995	1.0027	0.4897	-0.7784	0.7576	1.7428	1.2486	-0.4051	-0.587	0.1234	1.8764	-0.9865	0.02428	0.12	-0.5572	0.4362	0.2544	0.6288	3.074	3.6448	-0.5589	-0.5755	1.2812	-0.3227	-0.3494
HEBP1	1.8473	-0.3023	-0.2379	0.03885	0.5973	-0.525	1.2415	-0.6221	0.139	-0.3994	-0.08245	-0.392	-0.7023	2.5253	0.4125	0.7961	-0.6097	0.2497	-0.2639	-0.6654	-0.4682	1.4911	0.455	0.02323	2.2462	0.5474	-0.191	-0.6435	1.1832	1.5515	0.5613	-0.3733	0.06437	0.1174	-0.3391	-0.1582	-0.1196	-0.2635	0.02563	0.02617	0.2109	0.4038	0.822	1.1711	-0.6966	-0.2388	1.6007	0.0007871	-0.5859
PSMB10	-0.9807	0.3304	-0.09416	-1.5108	-0.3116	0.03415	-0.8986	-0.1823	-0.6791	0.3166	-0.9498	0.975	0.1615	-1.6662	0.0643	2.1882	0.1986	0.4708	-0.3912	0.0103	-0.5455	-1.8749	-0.6966	-0.7071	-0.4102	-0.09347	-0.2809	0.4143	0.7838	0.7545	-0.9207	0.2799	-0.1586	-0.02828	1.5142	-1.975	-0.2141	-0.226	-0.05954	0.05142	-0.3105	0.191	-0.2835	-0.134	-0.1915	-0.39	-2.6069	-0.05385	0.09018
ASCC3	-0.4111	-0.00705	-1.2734	-1.3492	-0.3665	0.1441	0.5904	-0.3393	-0.1139	-0.5813	-2.1578	1.0965	0.1341	-0.5678	-2.2843	-4.6219	-1.0627	-0.8241	-0.4509	-0.5701	1.3772	-0.324	-0.6862	-0.6255	-1.3057	0.8734	-1.1625	-0.6319	0.2537	-2.1864	-2.7027	0.2665	-0.4002	0.7603	0.338	2.1778	0.1055	0.6564	-2.206	-0.5227	-0.7594	-0.2036	0.2202	-0.7153	1.0235	-0.2052	-0.8907	2.0611	-0.06219
FGFR4	-1.4316	0.4209	1.6545	-0.039	0.0814	1.8695	0.1578	-0.3347	1.7247	-0.5795	-0.3746	-1.6054	-0.6581	-1.5474	-0.1114	3.7141	1.0869	0.04985	-2.6048	-0.6594	-2.6989	-0.0065	-1.0032	1.3833	-1.3265	-0.7585	-0.5366	-1.4509	0.8167	-0.8639	0.2261	1.4548	-0.1735	1.8486	0.5528	-0.8345	-0.427	0.4816	1.7919	-0.05324	0.7796	0.1991	0.1457	-1.8395	-0.6084	-0.3161	-0.353	-0.9373	-0.8985
CDKN2A	0.2343	1.8965	0.7129	-0.1672	1.5562	0.3453	0	0.8505	1.007	0.9326	1.1027	0.3754	0.7442	0.2966	2.089	-2.66	2.0715	0.1259	0.3623	-3.2649	1.9361	1.7005	0.8636	-0.8063	1.4837	0.2072	0.1366	0.424	1.5531	2.272	3.0636	0.6307	-5.1702	1.168	0.3563	3.4359	0.5337	0.1131	0.8567	1.4572	1.5163	0.4385	0.1263	2.6456	0.6608	0.2447	1.2761	0.3588	0.4939
TRAM2	-0.2058	0.5139	-0.03828	0.6922	0.5289	0.4065	0.5408	0.4794	0.4469	-0.4471	-0.8314	-0.4966	0.5132	-1.7896	-1.1813	-3.286	0.4154	-0.7179	-0.6179	0.3872	0.3453	-0.8828	-0.2234	-0.2717	-0.5954	0.2231	-0.3044	-0.03067	-1.8955	0.2318	0.09619	0.2892	-0.8973	0.3676	0.5624	-2.4291	-0.2498	0.4794	0.04607	0.2334	-0.5068	-0.4309	-0.8664	-0.8006	1.4843	0.955	-0.62	0.5746	-0.114
ATP11B	1.2773	-0.03635	1.6443	-0.258	-0.2829	0.4237	1.2394	1.6842	0.9581	0.7415	0.7893	6.8606	-0.1744	0.9546	2.1983	3.1405	0.893	1.1022	0.3802	1.6364	2.7812	1.6269	0.1847	0.1719	1.7897	0.3161	0.1634	1.5625	0.7483	2.0654	0.5364	0.61	1.5377	0.6124	2.5376	0.7534	0.2963	0.384	1.9838	-0.6129	-0.9004	-0.468	-0.5847	0.7459	-1.0146	-0.04684	-0.3535	0.06026	0.9742
PYCR1	5.1488	0.7638	0.2773	0.4204	1.1227	0.06608	0.7374	-1.5641	0.191	0.3496	0.1471	-2.118	0.1077	-2.6968	-0.7941	-3.2737	0.5095	-0.4647	-1.2199	0.1782	-0.28	-2.5098	1.2708	-0.3987	-3.7406	-0.3207	0.5521	-1.1235	-2.0184	-1.4872	0.03398	0.8779	0.2069	-1.1055	-3.1285	-0.6155	0.157	-0.147	-0.006672	0.389	0.2691	0.9367	0.09732	-6.0685	0.2241	0.5117	-3.9243	0.07312	0.08878
CD320	-1.0886	0.155	0.08158	-4.7447	0.3331	-0.008631	0.44	0.07919	-1.1812	0.3912	0.1256	0.0791	-1.0443	1.1015	0.1718	-3.6466	1.1087	0.5258	-2.1432	-4.127	-5.0827	-6.1089	-0.4221	-2.1003	-0.1252	0.05126	0.07081	-0.7818	1.0064	0.87	0.2864	-0.06866	0.5693	-0.3321	-0.008523	2.7678	-0.2563	-0.579	-4.7526	-0.3599	0.65	0.9641	0.7224	-3.5421	-0.4435	0.4254	0.8012	-1.2339	-3.5897
NCOA3	-0.4859	-0.971	-1.6201	-1.4654	-0.2088	-0.585	0.2342	-0.6434	0.5168	-0.1016	-0.2087	-1.0729	-0.9119	1.0403	0.3845	3.4616	-0.05717	1.3702	1.3931	2.8863	4.974	4.6356	-0.1471	1.3679	1.0967	-0.5178	0.3082	0.3759	-0.6405	1.5606	-0.1454	-0.4949	-1.5651	0.2403	0.6458	1.5612	-0.6017	-0.695	3.055	-0.1154	0.1849	0.8259	-0.3314	4.4304	0.8067	0.08797	-0.9161	-0.4068	3.8032
CDKN1B	0.1314	0.02185	0.3616	-0.6878	0.1557	0.1424	-3.7694	-0.05644	-0.5423	-0.2176	-0.2516	0.0473	-2.6973	-6.1769	-0.3957	0.6017	-0.1314	0.3021	-3.0508	-1.803	-5.1297	-3.985	0.4582	-0.4502	-1.7145	-0.3901	-2.9246	-5.8903	1.553	-1.0528	-1.0147	-2.1253	-0.411	0.2416	-2.7208	-0.1892	-0.05772	0.1115	-2.1629	-0.0129	-0.5944	-0.8214	0.0301	-1.6824	0.5956	0.3173	-3.5868	-0.7843	0.268
POLD4	-1.0579	-1.0638	0.06311	-0.3886	-0.2634	-1.192	2.9779	0.0289	0.1262	0.03605	0.0097	-0.9523	2.3045	2.7169	0.9746	2.6006	-0.9772	1.4642	4.8301	0.7619	2.7271	1.1962	0.05315	1.343	4.8142	-0.7467	1.1597	5.8516	-0.8171	0.4581	-0.7021	3.2096	0.4247	-0.492	-1.1186	-4.1673	0.4414	0.1191	1.7861	0.463	-1.2241	-0.1425	-0.4226	6.7532	0.4795	0.42	3.3524	-1.432	0.7372
FOSL1	0.7931	-0.9786	-0.5027	0.3016	-0.066	-0.7652	0.0086	-0.4707	-0.7121	-0.794	-0.7949	-0.2348	-0.04646	-0.8179	-0.0631	-2.1562	-1.1873	1.3074	1.5946	-0.6456	-0.975	2.0413	0.4663	0.3476	1.8643	0.5518	0.9132	-0.0125	0.4206	2.3543	0.09169	-0.7147	-0.238	0.578	0.5885	2.618	-0.2773	-0.4892	-1.9105	-1.8315	-0.5253	0.5836	0.4235	1.2347	0.4903	-0.3837	3.2337	0.5082	-1.0264
MLLT11	-0.6671	0.2499	-0.2989	0.2123	-0.1962	-0.08701	-0.3196	-0.3517	0.5224	-0.3791	-0.1239	0.4438	0.1359	5.3493	-0.3899	-3.2497	-0.5837	-0.9995	5.9524	-0.2229	-0.4855	-1.9347	2.6641	6.431	0.2723	0.2621	-0.7962	0.4485	-0.4461	1.6605	0.08077	0.1501	0.8859	-0.3368	0.2786	0.01133	-0.259	0.2709	-0.03929	2.3162	1.133	-1.2063	-0.6046	2.6286	-1.307	0.5709	1.3302	-0.1547	0.175
CEBPZ	1.6726	0.6768	0.1953	0.0232	-0.1276	-0.4864	-0.05945	-0.03587	0.5927	0.4282	-0.4714	3.2532	-0.5229	1.3817	2.242	-0.4252	2.0903	1.6582	-0.3069	-0.1637	0.7501	-0.2637	-0.0303	-0.2471	0.02603	-0.3335	0.4561	0.05134	-0.1115	0.2405	0.09638	-0.7058	0.4169	-0.4034	0.4448	1.1251	-0.5979	-0.6129	-0.9252	-0.1382	0.8906	2.7381	1.1767	0.9218	1.4001	-0.9605	-0.3001	1.5337	0.8425
PRKACA	-1.5271	-0.4296	0.05502	0.2206	-0.1395	0.03178	0.7601	0.9125	-0.1389	0.2285	1.2226	-3.0324	-0.1469	2.3643	0.6957	2.6846	-0.1571	-0.5932	-0.5882	0.9109	-2.0866	-0.1621	-0.1088	0.6513	1.3479	-1.0601	0.4696	-0.7991	0.6517	1.1673	1.351	0.9246	0.2711	-0.445	1.4073	0.8076	0.3664	-0.6037	0.9368	0.4648	-0.4996	-2.715	-0.3295	-1.7915	-1.9614	0.02336	-0.01093	-2.7457	-2.3858
GAPDH	0	0	0	0	0	0	0	0	-0.09618	0	0	0	0	0	0	-3.5412	0	-3.8288	-0.6411	0	-5	-0.4424	-0.8849	0	-0.27	0	-0.3135	0	-0.2881	-0.3178	0	0	0	-0.2476	-0.3356	0	0	-1.3536	0	0	0	-0.3429	-3.6686	0	0	0	0	-2.054	0
CBR3	-1.4477	-2.1336	-3.3046	-1.6306	-0.2831	-2.1904	-4.9622	-1.3484	-2.0214	-2.1021	-2.5589	-5.2733	-1.2967	-4.0748	-0.5168	-2.0394	-1.7292	0.6684	-2.9024	-3.7667	-0.3679	-4.8635	-2.8138	0.2592	-2.7888	-0.8004	-1.8559	-2.5254	-2.3578	-2.4449	-2.6407	0.01555	-3.2488	-0.2582	1.2294	-3.3671	-3.1036	-0.8632	-3.7854	-2.5584	-2.0531	0.2819	-1.0124	-3.6974	-0.8679	0.1859	-3.4966	0.04129	0.08977
LYRM1	2.6383	1.3141	2.5908	1.11	0.9385	2.1429	1.9655	1.23	1.682	1.58	1.8989	1.8421	2.11	2.3865	0.3519	-0.2239	0.729	-0.9419	-0.1015	2.8561	-0.2137	2.3572	0.7893	0.5419	0.1874	1.7424	0.6273	1.9996	2.2578	-0.2458	0.4638	-0.133	2.3534	0.4444	0.4108	0.6609	1.6892	1.3372	2.7823	1.7375	1.099	-0.5499	-0.8216	0.8534	1.6235	-0.7934	-0.1361	-0.4218	-0.1666
[truncated: 987 more columns]
